# Supplementary material for: Randomised controlled trials on prevention, diagnosis and treatment of diabetes in African countries: a systematic review
Source: PubMed Central journal article supplement — BMJ Open. 2022 May 10;12(5):e050021. doi: 10.1136/bmjopen-2021-050021 (PMC9096485; doi:10.1136/bmjopen-2021-050021), 2022-05-10
Supplement: bmjopen-2021-050021.draft_revisions.pdf [file bmjopen-2021-050021.draft_revisions.pdf]

# BMJ Open

BMJ Open is committed to open peer review. As part of this commitment we make the peer review history of every article we publish publicly available.

When an article is published we post the peer reviewers' comments and the authors' responses online. We also post the versions of the paper that were used during peer review. These are the versions that the peer review comments apply to.

The versions of the paper that follow are the versions that were submitted during the peer review process. They are not the versions of record or the final published versions. They should not be cited or distributed as the published version of this manuscript.

BMJ Open is an open access journal and the full, final, typeset and author-corrected version of record of the manuscript is available on our site with no access controls, subscription charges or pay-per-view fees (<http://bmjopen.bmj.com>).

If you have any questions on BMJ Open's open peer review process please email [info.bmjopen@bmj.com](mailto:info.bmjopen@bmj.com)

# BMJ Open

## Randomized controlled trials on prevention, diagnosis, and treatment of diabetes in African countries - a systematic review

|                               |                                                                                                                                                                                                                                                                                                                                                                                                                                                                                                                                                                                                                                                                                                                                                                                                                                                                      |
|-------------------------------|----------------------------------------------------------------------------------------------------------------------------------------------------------------------------------------------------------------------------------------------------------------------------------------------------------------------------------------------------------------------------------------------------------------------------------------------------------------------------------------------------------------------------------------------------------------------------------------------------------------------------------------------------------------------------------------------------------------------------------------------------------------------------------------------------------------------------------------------------------------------|
| Journal:                      | <i>BMJ Open</i>                                                                                                                                                                                                                                                                                                                                                                                                                                                                                                                                                                                                                                                                                                                                                                                                                                                      |
| Manuscript ID                 | bmjopen-2021-050021                                                                                                                                                                                                                                                                                                                                                                                                                                                                                                                                                                                                                                                                                                                                                                                                                                                  |
| Article Type:                 | Original research                                                                                                                                                                                                                                                                                                                                                                                                                                                                                                                                                                                                                                                                                                                                                                                                                                                    |
| Date Submitted by the Author: | 28-Aug-2021                                                                                                                                                                                                                                                                                                                                                                                                                                                                                                                                                                                                                                                                                                                                                                                                                                                          |
| Complete List of Authors:     | Sandholzer-Yilmaz, Angelika; Martin Luther University of Halle Wittenberg Faculty of Medicine, Institute of General Practice and Family Medicine; University of Göttingen, Department of Haematology and Oncology,<br>Kroeber, Eric; Martin-Luther-Universität Halle-Wittenberg Medizinische Fakultät, Institute of General Practice and Family Medicine<br>Ayele, Wondimu; Addis Ababa University, Department of Preventive Medicine<br>Frese, T; University of Halle-Wittenberg,, Institute of General Practice & Family Medicine of the Medical Faculty<br>Kantelhardt, Eva; Martin-Luther-University Halle-Wittenberg, Institute for Medical Epidemiology, Biostatistics and Informatics<br>Unverzagt, Susanne; Institute of General Practice and Family Medicine, Martin-Luther University Halle-Wittenberg; Department of General Practice, University Leipzig |
| Keywords:                     | Diabetes in pregnancy < DIABETES & ENDOCRINOLOGY, Diabetes & endocrinology < INTERNAL MEDICINE, General diabetes < DIABETES & ENDOCRINOLOGY                                                                                                                                                                                                                                                                                                                                                                                                                                                                                                                                                                                                                                                                                                                          |
|                               |                                                                                                                                                                                                                                                                                                                                                                                                                                                                                                                                                                                                                                                                                                                                                                                                                                                                      |

SCHOLARONE™  
Manuscripts

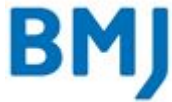

I, the Submitting Author has the right to grant and does grant on behalf of all authors of the Work (as defined in the below author licence), an exclusive licence and/or a non-exclusive licence for contributions from authors who are: i) UK Crown employees; ii) where BMJ has agreed a CC-BY licence shall apply, and/or iii) in accordance with the terms applicable for US Federal Government officers or employees acting as part of their official duties; on a worldwide, perpetual, irrevocable, royalty-free basis to BMJ Publishing Group Ltd ("BMJ") its licensees and where the relevant Journal is co-owned by BMJ to the co-owners of the Journal, to publish the Work in this journal and any other BMJ products and to exploit all rights, as set out in our [licence](#).

The Submitting Author accepts and understands that any supply made under these terms is made by BMJ to the Submitting Author unless you are acting as an employee on behalf of your employer or a postgraduate student of an affiliated institution which is paying any applicable article publishing charge ("APC") for Open Access articles. Where the Submitting Author wishes to make the Work available on an Open Access basis (and intends to pay the relevant APC), the terms of reuse of such Open Access shall be governed by a Creative Commons licence – details of these licences and which [Creative Commons](#) licence will apply to this Work are set out in our licence referred to above.

Other than as permitted in any relevant BMJ Author's Self Archiving Policies, I confirm this Work has not been accepted for publication elsewhere, is not being considered for publication elsewhere and does not duplicate material already published. I confirm all authors consent to publication of this Work and authorise the granting of this licence.

1  
2  
3 **Randomized controlled trials on prevention, diagnosis, and treatment of diabetes**  
4 **in African countries - a systematic review**  
5

6 Sandholzer-Yilmaz AS, Kroeber ES, Ayele W, Frese T, Kantelhardt EJ, Unverzagt S  
7  
8  
9

10 Mrs. Angelika Sabine Sandholzer-Yilmaz: University Medical Center Göttingen,  
11 Department of Haematology and Oncology, George-August-University Göttingen,  
12 Robert-Koch-Straße 40, 37075 Göttingen, Germany.  
13 Email: angelika.sandholzer@med.uni-goettingen.de  
14

15 Dr. Eric Sven Kroeber: Center of Health Sciences, Institute of General Practice and  
16 Family Medicine, Martin-Luther University Halle-Wittenberg, Magdeburger Straße 8,  
17 06112 Halle (Saale), Germany.  
18 Email: eric.kroeber@posteo.de  
19

20 Dr. Wondimu Ayele: School of Public Health, Addis Ababa University, P.O. Box: 9086,  
21 Addis Ababa, Ethiopia.  
22 Email: wondaay@gmail.com  
23  
24

25 Prof. Dr. Thomas Frese: Center of Health Sciences, Institute of General Practice and  
26 Family Medicine, Martin-Luther University Halle-Wittenberg, Magdeburger Straße 8,  
27 06112 Halle (Saale), Germany.  
28 Email: thomas.frese@uk-halle.de  
29

30 Dr. Eva Johanna Kantelhardt: Center of Health Sciences, Institute for Medical  
31 Epidemiology, Biostatistics and Informatics, Martin-Luther University Halle-Wittenberg,  
32 Magdeburger Straße 8, 06112 Halle (Saale), Germany.  
33 Email: eva.kantelhardt@uk-halle.de  
34

35 PD. Dr. Susanne Unverzagt: Center of Health Sciences, Institute of General Practice  
36 and Family Medicine, Martin-Luther University Halle-Wittenberg, Magdeburger Straße  
37 8, 06112 Halle (Saale), Germany.  
38 Email: susanne.unverzagt@uk-halle.de  
39  
40

41 Total word count: 5915  
42  
43  
44

45 **Corresponding author:**

46 Mrs. Angelika Sabine Sandholzer-Yilmaz: University Medical Center Göttingen,  
47 Department of Haematology and Oncology, George-August-University Göttingen,  
48 Robert-Koch-Straße 40, 37075 Göttingen, Germany.  
49 Email: angelika.sandholzer@med.uni-goettingen.de  
50  
51  
52  
53  
54  
55  
56  
57  
58  
59  
60

## ABSTRACT

**Objectives** The epidemiological transition from infectious to chronic diseases leads to novel challenges in African health systems. The prevalence of diabetes mellitus (DM) is increasing dramatically. Undiagnosed and undertreated DM leads to numerous complications including end-organ damage and death. Our objectives were to collect the best locally generated evidence on DM interventions, identify knowledge gaps, and determine underexplored research areas.

**Design** A systematic review and meta-analysis of randomized controlled trials.

**Participants and setting** African patients in primary, secondary and tertiary prevention, diagnosis and treatment DM type 1 (DM1), type 2 (DM2) and gestational DM (GDM).

**Outcome** All-cause mortality, glycemic control, complications, quality of life, hospital admission, treatment adherence and costs.

**Data sources** Articles published in MEDLINE Ovid, CENTRAL, CINAHL, African Journals Online and African Index Medicus and the International Clinical Trials Registry Platform in English language without time restrictions.

**Results** Out of 3736 identified publications, we included 60 eligible studies conducted in 15 countries 75 % were conducted in urban health care settings, including 10,112 participants. We included eight studies on DM1, six on GDM, two on pre-DM, 37 on mainly DM2 including seven on DM related complications. The design of the studied intervention was heterogeneous with a focus on educational strategies. The other studies investigated the efficacy of nutritional strategies including food supplementations, pharmacological strategies and strategies to enhance physical activities. Seven studies included interventions on DM-related complications.

**Conclusions:** Research activities increased in recent years, but available evidence is still not representative for all African countries and rural areas. We detected a lack of evidence in primary health care and locally implemented pharmacological interventions. The identified studies offer a variety of effective approaches as a basis for local guidelines in the different fields of action in DM care adjusted to regional circumstances.

**PROSPERO registration number:** CRD42019122785.

**Keywords:** Diabetes mellitus, Africa, systematic review, randomized-controlled trial

### Strengths and limitations of this systematic review

- This systematic review includes studies at the highest level of evidence to provide an overview of the best available interventions to prevent, diagnose and treat DM in the African context.
- Inclusion criteria are restricted to randomized controlled trials conducted in African countries published in English language with no restrictions on time of publication.
- We performed a systematic search in four international databases and updated the search in October 2020.
- The main aim of our systematic review is to provide an overview of interventions for DM. Meta-analyses are restricted to regularly reported results on HbA1c as strong clinical outcome indicator of an efficient DM management.
- Limited external validity due to the origin from few countries and urban areas, results concentrate on glycemetic control due to short follow-up periods.

## INTRODUCTION

Diabetes mellitus (DM) and other non-communicable diseases (NCDs) are responsible for a double burden in African countries due to the epidemiological transition from communicable to non-communicable diseases and resulting disabilities and deaths (1-3). In Africa, around 19.4 million adults are living with DM. Prevalence rates range from 4.7 % in Sub Saharan Africa (SSA) to 12.2 % in the Middle East and North Africa region (4). Due to the increasing prevalence of risk factors such as obesity and westernized lifestyle, the prevalence of DM is expected to increase by 96 % in SSA until 2045 (4). Currently, about 50 to 60 % of adults living with DM in African countries are undiagnosed (4, 5). Low awareness as well as genetic differences and lifestyle habits result in very heterogeneous prevalence rates of DM between different countries in Africa as well as rural and urban regions (6, 7). Undiagnosed and undertreated DM can result in organ damage, and lead to complications like cardiovascular diseases, peripheral neuropathy, retinopathy and diabetic foot (7, 8). Moreover, these factors attribute to substantial financial costs for households and governments (9). Recently, almost one fifth of COVID-19 deaths in African countries occurred among DM patients (10).

The United Nations 2030 Agenda aims to reduce the burden of premature mortality from NCD including DM through improvement in prevention and treatment (11). Measures on DM include early detection in primary health-care settings, lifestyle modifications including diet, physical activity and, if necessary, medication. Since DM patients need regular specialist assessment, a functioning referral system is necessary (12). These general management strategies have to be adjusted to local contexts in African countries including environmental, cultural and social aspects like the relatively young age of patients, co-infections, long distances to health-care facilities, traditional beliefs, decision making in the families and socioeconomic status. Furthermore, there is a huge genetic diversity on the African continent (13, 14).

The purpose of this review was to collect the best locally generated evidence, regarding preventive, diagnostic and therapeutic intervention on DM, as the lack of evidence is one of the major challenges to prevent and control DM in African countries. Therefore, we aimed to address existing knowledge gaps and identify unexplored research areas in the African context. This may support the formulation of local evidence-based strategies to systematically strengthen clinical and preventive capacities of healthcare systems in African countries.

## METHODS

We prospectively registered a protocol of this systematic review in the PROSPERO International Prospective Register of systematic reviews (CRD42019122785). This systematic review follows the recommendations of the Preferred Reporting Items for Systematic reviews and Meta-Analyses (PRISMA) (15) and the methods described in the Cochrane Handbook for Systematic Reviews of Interventions (16).

### Inclusion criteria and exclusion criteria

This systematic review includes studies conducted in African countries on the efficacy of interventions for prevention, diagnosis and treatment of patients with DM including prediabetes, type 1 (DM1), type 2 (DM2) and gestational DM (GDM). Primary outcome was defined to be all-cause mortality. Secondary outcomes included glycemic control (HbA1c, fasting serum or plasma glucose, insulin resistance, oral glucose tolerance test), quality of life, treatment adherence, hospital admissions, complications of DM and resulting costs (see Table 1 for detailed inclusion criteria).

We included full-text publications on randomized controlled trials (RCTs) (e.g. individual RCTs, cluster-RCTs and randomized cross-over trials) according to the Consolidated Standards of Reporting Trials (CONSORT) (17) published in English language. We excluded international multicenter studies with less than 50 % of sites in African countries to ensure that the study location was in Africa.

|                    |                                                                                                                                                                                                                                                                                                                                                                                                                                                                                                                                                                     |
|--------------------|---------------------------------------------------------------------------------------------------------------------------------------------------------------------------------------------------------------------------------------------------------------------------------------------------------------------------------------------------------------------------------------------------------------------------------------------------------------------------------------------------------------------------------------------------------------------|
| Design and setting | RCTs, mainly conducted in African countries (at least 50 % African countries in international studies)                                                                                                                                                                                                                                                                                                                                                                                                                                                              |
| Population         | African patients in primary, secondary or tertiary prevention with a clinical diagnosis of <ul style="list-style-type: none"> <li>• Prediabetes</li> <li>• Diabetes mellitus type 1 (DM1, due to autoimmune <math>\beta</math>-cell destruction)</li> <li>• Diabetes mellitus type 2 (DM2, due to a progressive loss of adequate <math>\beta</math>-cell insulin secretion)</li> <li>• Gestational diabetes (diagnosed in the second or third trimester of pregnancy that was not clearly overt diabetes prior to gestation)</li> </ul> As described by the authors |
| Interventions      | All interventions to of prevent, diagnose and treat diabetes                                                                                                                                                                                                                                                                                                                                                                                                                                                                                                        |
| Comparison         | Placebo or standard care<br>Another intervention or the same intervention with a different dose or timing                                                                                                                                                                                                                                                                                                                                                                                                                                                           |
| Outcome            | <u>Primary:</u> all-cause mortality<br><u>Secondary:</u> <ul style="list-style-type: none"> <li>• glucose control (HbA1c, oral glucose tolerance test, insulin resistance, fasting serum or blood glucose)</li> <li>• complications</li> <li>• quality of life</li> <li>• hospital admission</li> <li>• treatment adherence</li> </ul> <u>Additional:</u> costs at longest follow-up                                                                                                                                                                                |
| Publications       | Full-text publications according to CONSORT                                                                                                                                                                                                                                                                                                                                                                                                                                                                                                                         |



CONSORT: Consolidated Standards of Reporting Trials; DM: Diabetes mellitus; DM1: Type 1 diabetes; DM2: Type 2 diabetes; GDM: Gestational diabetes; HbA1c: hemoglobin A1c; RCT: randomized controlled trial

## Table 1: Inclusion and exclusion criteria

### Systematic search

We performed a systematic search in electronic bibliographic databases (MEDLINE Ovid, CENTRAL, International Clinical Trials Registry Platform of the WHO) as planned in the protocol and added a search in CINAHL and regional electronic databases (African Journals Online and African Index Medicus) (see Online Supplemental File 1 material). All searches were performed without time constrictions. The last search was conducted in October 2020. Search strings were based on Medical Subject Headings (MeSH) and terms on DM, Africa, a list of all 54 African countries and terms related to RCTs. All references retrieved from the literature search were exported into a reference manager software (EndNote) (18). Duplicate references were identified in case of congruence of authors, title, year and journal and thusly deleted. The search strategy is available in the supplementary file.

### Study selection and data extraction.

Two authors independently checked titles and abstracts based on the inclusion criteria (Table 1). The full texts of all potentially eligible papers were assessed for final inclusion. All disagreements were resolved by discussion until consensus was obtained (15). All reported information on the following were extracted and checked by another author:

- publications, registration and design,
- time and place (country, urban/ rural setting and health care setting)
- study population (inclusion and exclusion criteria, sample size and baseline characteristics on age, gender, type and length of DM, body mass index (BMI) and glycemic control at baseline)
- intervention and control groups with the number of randomized participants per group and duration of the interventions
- outcomes (classified into primary, secondary, non-specified) and
- results on pre-planned outcomes within the longest follow up period with intervention effects with their 95 % confidence intervals (CI) and level of significance.

The study names were defined by the surname of the first author and the year of the first full-text publication of the results. We compared study and patient characteristics across studies to ensure that each included study represents a unique publication of study data. In cross-over RCTs, only data from the first period were used (19).

### Quality assessment and risk of bias

Risk of bias was judged based on seven specific categories (sequence generation, allocation concealment, blinding of participants/personnel, blinding of outcome assessors, incomplete outcome data, selective outcome reporting and other sources of bias) of the Cochrane risk of bias tool as 'low', 'high' or 'unclear' (16). Judgments were done by two of the authors and all discrepancies were resolved by discussion.

Judgments on blinding and incomplete outcome data were based on the primary outcome of included studies. Selective outcome reporting was defined as low when the study protocol with pre-defined primary and secondary outcomes was available and high when any result of pre-planned outcomes was missing. Incomplete outcome data was judged as high when more than 10% of randomized participants dropped out from analyses. Other sources of bias were judged as high risk of bias including missing reporting of sample size calculation, no description of a primary endpoint, and relevant differences of main baseline characteristics between intervention and control groups (16).

### Data synthesis

The results of all pre-defined outcomes were described. Effect sizes on HbA1c for the longest follow-up period were visualized in forest plots using RevMan (20). Negative mean differences (MDs) describe lower HbA1c in the intervention compared to the control group. Statistically significant results on HbA1c with MDs over 0.25 % for HbA1c were considered clinically relevant. Heterogeneity was interpreted based on the  $I^2$  statistics as not important ( $I^2 < 30\%$ ), moderate (30-60 %) and substantial ( $I^2 > 60\%$ ) (16).

### Patient and Public Involvement

There is no patient involved

## RESULTS

A total of 2865 references were identified from electronic databases and 871 additional trials from the Clinical Trials Registry Platform were checked. We evaluated 185 potentially eligible full-text publications and included 60 eligible studies in 68 publications in this review (Figure 1 and Supplementary file).

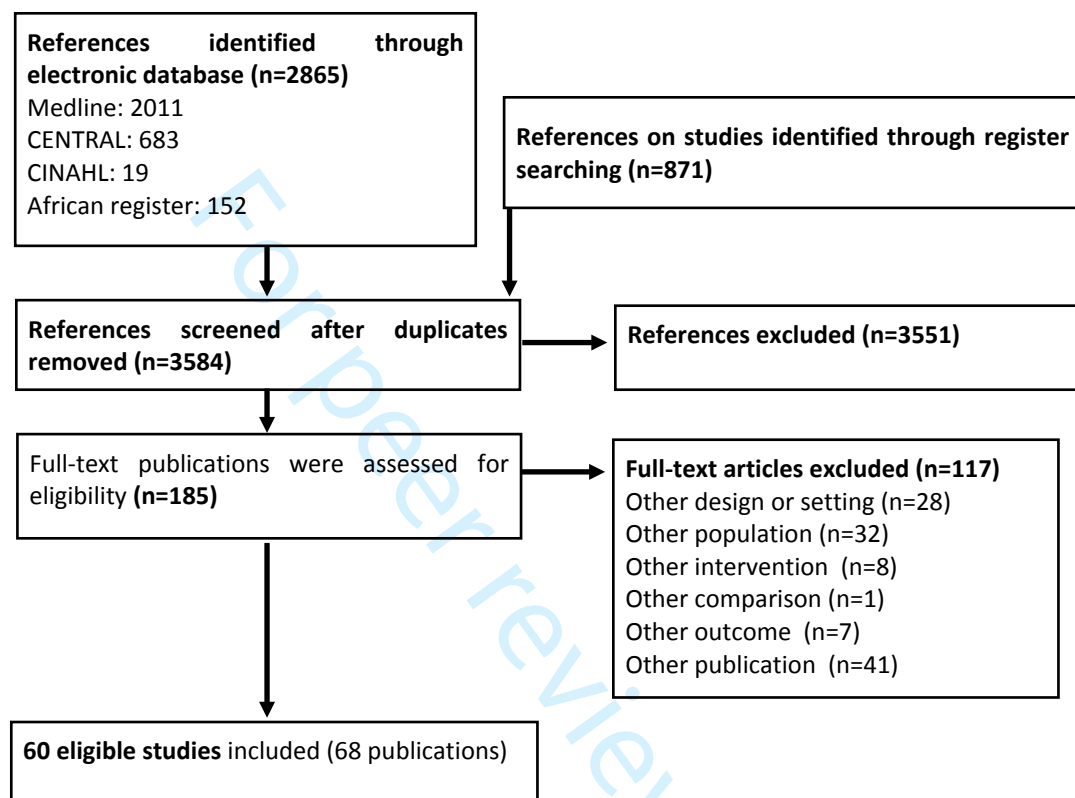

**Figure 1:** PRISMA flow chart describing the process of study selection

### Setting

In total 60 studies, which were conducted in 64 study centers of 15 African countries; North Africa (33 studies from four countries), West Africa (10 studies from three countries), East Africa (seven studies from 7 countries), Central Africa (three studies from two countries) and Southern Africa (11 studies only from South Africa) were included. Two studies (Malek 2015 and Chraibi 2017) were conducted in more than one African country and partially conducted in non-African countries. Chraibi (2017) was conducted in Egypt, Morocco, South Arabia and Vietnam. Malek (2015) included four study centers in Alergia, Tunesia, Egypt and South Africa. Those additional study centers are presented in brackets behind the country names in Figure 2. Egypt, South Africa and Nigeria are the three study centers included most often in this review (Figure 2 and Table 2 available in the supplement).

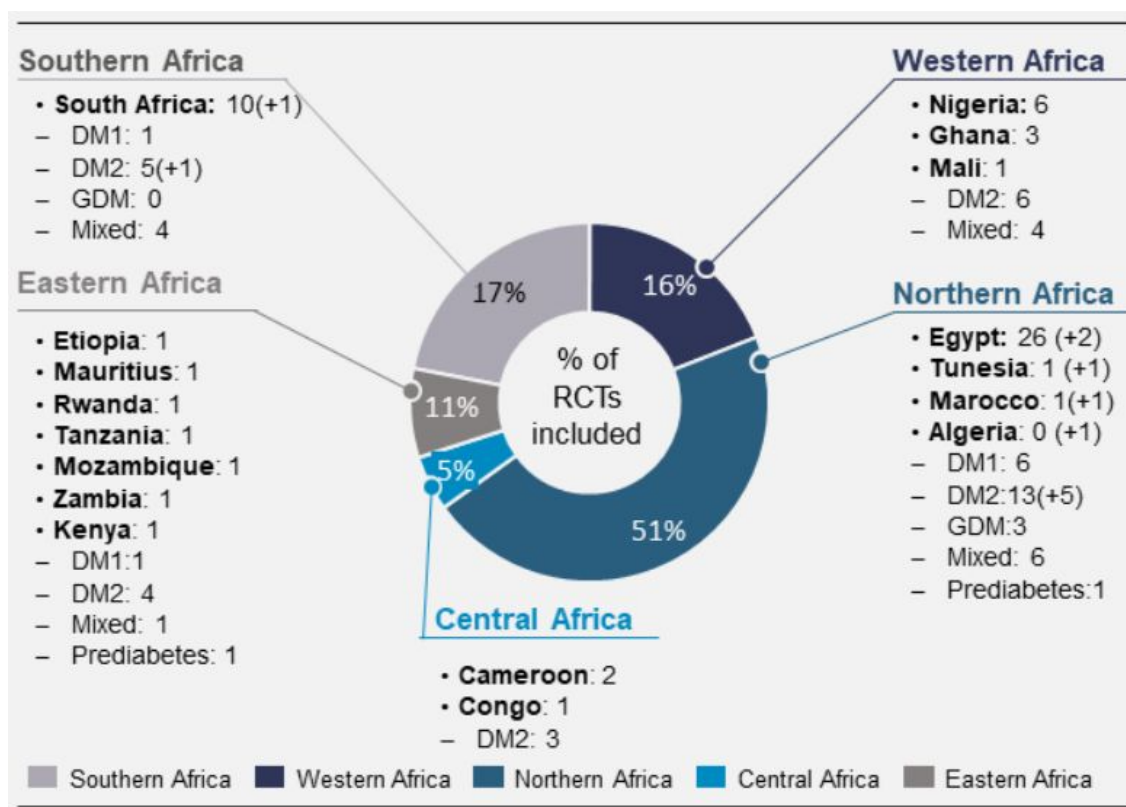

**Figure 2: Geographical regions, countries, and type of DM of the included studies**

Seventy-five percent of the studies (45/60) were set in urban areas, 5 % (3/60) were in rural areas only. The setting of the remaining 20 % (12/60 studies) was mixed or remained unclear. The majority, 83 % (50/60) of the studies, were conducted in secondary and tertiary health care centers, while 17 % (10/60) took place in primary care settings.

Though the search had no time restrictions, the oldest eligible study (Anderson 2001) was published in 2001. More than 60 % of the studies were published since 2015, and 22 % of them had been published in 2019 or 2020 (see Table 2 available in the supplement).

### Design

Fifty parallel-group studies randomized individual participants with DM. Six cluster-randomized studies (Fairall 2016, Labhardt 2011, Mash 2014, Steyn 2013, Utz 2018, Webb 2015) randomly assigned health care facilities to intervention and control groups. In three randomized cross-over studies (Abdulrhman 2013, Krawinkel 2018, van der Hoogt 2017) each participant received different interventions in a random sequence, and in one study (Ghoneim 2013) each patient received two different treatment doses for each eye based on a random allocation of eyes and doses.

### **Interventions for patients with pre-DM**

Two studies randomized a total of 112 overweight or obese patients (BMI 25–35 kg/m<sup>2</sup>) with pre-DM (HbA1c 5.7–7.5 %) and a mean age of 32.9 and 47.5 years (see Table 2: Characteristics and results of studies on patients with pre-DM available in the supplement). These studies stated the efficacy regarding glycemic control of low and high volume, high-intensity interval training strategies (RezkAllah 2019), and the consumption of bitter melon to improve glucose control (Krawinkel 2018).

### **Interventions for patients with DM1**

A total of 8 studies were conducted including 595 patients diagnosed with DM1 (Abdulrhman 2013, Elbarbary 2016, Elbarbary 2018, Elbarbary 2020, Malipa 2013, Mohamad 2009, Salem 2010, van der Hoogt 2017) (see table 3 Characteristics and results of studies on patients with DM1 available in the supplement). They mainly included children, adolescents, and young adults with a mean age between 10.4–19.9 years. The mean duration of DM ranged from 3.5 to 8.6 years and the mean baseline HbA1c from 7.21 to 9.52 %. The studies investigated heterogeneous strategies. Malipa 2013 showed the efficacy of weekly meetings to improve treatment compliance, reduce impact and worries about DM and improve general life satisfaction in adolescents. Salem 2010 evaluated the efficacy of two exercise programs to reduce cardiovascular risk with no relevant effect on glucose control. Three studies investigated different nutritional strategies and stated the beneficial effects of honey (Abdulrhman 2013) and camel milk (Mohamad 2009) on glucose control. Meals with low fat and protein (van der Hoogt 2017) caused less frequent hypoglycemic events. Elbarbary 2016 showed the efficacy of a low-glucose suspension algorithm during Ramadan to reduce the number of hypo- and hyperglycemic excursions. Two studies on food supplementation stated improved glycemic control with carnosine (Elbarbary 2018), but no benefit from a vitamin B complex (Elbarbary 2020).

### **Interventions for patients with DM2**

A total of 44 studies were conducted including 8881 patients suffering from DM2 or different diabetic illnesses (see Table 4: Characteristics and results of studies on patients with DM2 available in the supplement). Most studies included patients with a mean age between 50 and 60 years, only four studies included younger patients (Adjei 2015, El Gayar 2019, Matter 2020, Maharaj 2016). Most studies included more females than males. These studies presented a wide variety of patients in different stages of

1  
2  
3 DM2 and general conditions. They ranged from newly diagnosed DM (El Gayar 2019,  
4 Labhardt 2011, Mostafa 2019, Owolabi 2019, Somanah 2012), non-insulin dependency  
5 or oral insulin therapy (Adibe 2013, Ali 2019, Fayehun 2018, Maharaj 2016, Malek  
6 2015, Ragheb 2020) to durations of over 10 years with severe DM related  
7 complications (Abaza 2017, Nteleki 2015, Tsobigny-Tsague 2018, El-Shakawy 2016,  
8 Ghoneim 2013, Saeed 2013, Yakoot 2019). Thus, mean baseline HbA1c ranged from  
9 6.75% to 11.1%. Most studies included high proportions of overweight and obese  
10 participants with mean BMIs ranging from 22.4 to 40.8 kg/m<sup>2</sup>.

### 16 **Educational strategies**

17  
18 A total of 19 studies with 6942 patients and follow-up periods between 2-14 months  
19 investigated the impact of educational strategies on diabetes treatment. These included  
20 providing information about lifestyle modification measures, dietary recommendations,  
21 drug-based therapy, DM-related complications and self-management. Training  
22 sessions were provided based on group-based educational sessions or individual  
23 treatment plans by nursing staff or pharmacists and complemented by lectures,  
24 discussion services, brochures, newsletters, computer programs, electronic  
25 communication devices and tele-monitoring systems. Three of these studies were led  
26 by nurses (Adibe 2013, Hailu 2018, Labhardt 2011) and two cluster-randomized  
27 studies trained nurses to expand their role in the treatment of patients with NCDs  
28 (Fairall 2016) or aimed to improve guideline implementation in the treatment of patients  
29 with DM (Steyn 2013).

30  
31 Three studies (Abaza 2017, Adjei 2015, Labhardt 2011) reported results on treatment  
32 adherence. All strategies lead to improved adherence, measured by improved  
33 perception of patients to treatment recommendations (Abaza 2017) or higher regularity  
34 of appointment schedules (Adjei 2015, Labhardt 2011). Two studies (Adibe 2013, Mash  
35 2014) reported results on costs with lower costs for patients receiving educational  
36 strategies. Two studies reported fewer admissions to different health-care facilities  
37 (hospital or emergency room and clinic visits) (Abaza 2017, Chraibi 2017).

38  
39 Results on quality of life were reported in two studies with follow-up periods over 12  
40 months and conflicting results. A structured self-care education program by  
41 pharmacists and nurses (Adibe 2013) improved quality of life, but no benefit was  
42 shown after group education by trained professionals (Mash 2014).

43  
44 The majority of the educational strategies resulted in lower mean HbA1c levels in the  
45 intervention groups with a clinically relevant mean decrease of -0.66 % (95 %-CI -0.94  
46 to -0.39) and substantial heterogeneity between results of different studies ( $I^2=64\%$ )  
47 (Figure 3).

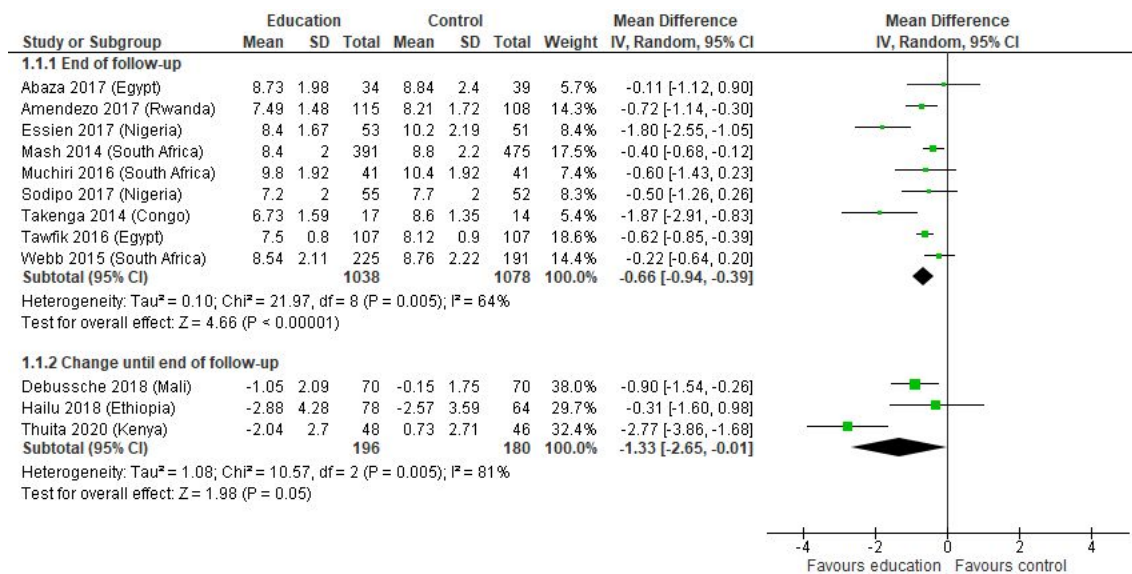

**Figure 3: Results of educational strategies on HbA1c levels or changes of HbA1c levels of patients with DM2**

### Strategies to enhance physical activity

Five studies with 359 participants evaluated the efficacy of different strategies to enhance physical activity on glucose control. Strategies included counselling, setting goals and training sessions with different intensities or both over periods between 8-12 weeks.

Two studies were successful in lowering HbA1c where patients were given goals to accumulate 10,000 steps per day (Fayehun 2018) or patients were allocated to rebound exercise (Maharaj 2016). A third study investigated the effects of aerobic exercise training and was able to decrease fasting plasma glucose (21).

Two other exercise interventions failed to reduce HbA1c by incremental exercises compared to relaxation (Van Rooijen 2004) or higher intensity of exercises (Yan 2014) (Figure 4). Results were not pooled due to considerable heterogeneity with different directions of treatment effects.

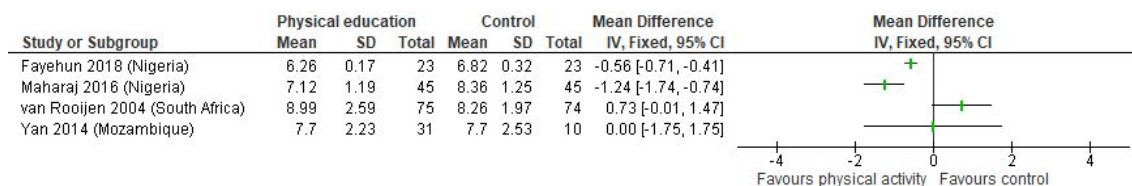

**Figure 4: Results of strategies to enhance physical activity on HbA1c levels of patients with DM2**

### **Pharmacological strategies**

Three studies with 479 participants tested the efficacy of pharmacological treatment strategies on glucose control of patients with DM2. El-Haggar 2015 found ketotifen and glimepiride an effective dual therapy. Malek 2015 described the non-inferiority of once-daily basal-bolus insulin analogues and thrice daily insulin therapy. Distiller 2014 did not find an additional improvement with exenatide in addition to insulin and metformin therapy on glycemic control.

### **Strategies on food supplementations**

Several different food supplementations were tested in 10 studies including 762 participants. Vitamin D3 supplementation had a positive effect on glycemic control in two studies (Ali 2019, Anyanwu 2016). Four studies tested the effect of plant-based substances. Ginger powder and balantines aegyptiaca (desert date) extract regimes supported glucose control (El Gayar 2019, Rashad 2017). Nigella sativa (black cumin) oil capsules slightly improved glucose control but were inferior to metformin (Moustafa 2019). A regime based on fermented papaya did show beneficial results (Somanah 2012). Anderson 2001 and Matter 2020 showed positive effects of zinc/ chromium in chronic DM and zinc supplementation in diabetic beta-thalassemia major patients. The addition of rutin and vitamin C did not improve the results of oral antidiabetics (Ragheb 2020). The addition of l-carnitine improved diabetic control achieved by glimepiride treatment (El-Sheikh 2019).

### **Strategies on the treatment of DM related complications**

Seven studies with 351 participants and follow-up periods between 3-12 months evaluated different strategies to treat possibly DM-related complications including periodontitis (3 studies), foot ulcerations (2 studies) and macular edema (2 studies). El-Makaky 2020 and Tsobgny-Tsague 2018 described the benefit of immediate vs. delayed non-surgical periodontal interventions on glucose control and El-Sharkawy 2016 stated the effectiveness of propolis as an additive in periodontitis treatment. Two studies stated a benefit of combined phototherapy and podiatric management (Nteleki 2015) and an additional local ointment application of royal jelly and panthenol (Yakoot 2019) on the healing of lower extremity ulcers. Ghoneim 2013 and Saeed 2013 tested different diabetic macular edema treatment strategies. Both studies described generally positive treatment effects but also considerable adverse events including rise of intra ocular pressure and glaucoma.



### **Interventions for patients with DM in a pregnant woman**

Six studies included a total of 574 pregnant women at increased risk for gestational DM (GDM) (Embaby 2016), with newly diagnosed GDM (Utz 2018, El-Shamy 2018, Ashoush 2016) or with newly diagnosed GDM or pre-existing DM (Beyuo 2015, Ibrahim 2014) between the 20<sup>th</sup> and 34<sup>th</sup> week of pregnancy. The mean age ranged from 24.2-33.3 years (see Table 5: Characteristics and results of studies on pregnant women with DM available in the supplements).

Three studies (Ashoush 2016, Beyuo 2015, Ibrahim 2014) with 289 participants examined metformin as an additional medication to insulin in comparison to insulin therapy only. Effects on glycemic control of metformin supported therapy ranged from a relevant decrease (Ashoush 2016) to no effect on fasting plasma glucose, but beneficial effect on two hour plasma glucose in a 75 g OGTT (Beyuo 2015) in women without insulin resistance. Adding metformin to insulin therapy of pregnant women with insulin resistant diabetes was associated with several benefits concerning the time of hospital stay, reduced occurrence of maternal or neonatal hyperglycemia, less neonatal intensive care unit (NICU) admissions and reduced cases of respiratory distress syndrome (Ibrahim 2014).

The other studies (285 participants) investigated non-pharmacological interventions. The tested interventions were aerobic exercise program (treadmill walking) (Embaby 2016), acupuncture (El-Shamy 2018) and screening for GDM, followed by nutritional and exercise counseling for positive tested women (Utz 2018). The aerobic exercise program resulted in a relevant reduction of fasting plasma glucose until delivery (Embaby 2016). The acupuncture intervention did not manage to show a benefit regarding glycemic control (El-Shamy 2018). Screening, counselling and intensive follow-up were able to improve glycemic control and reduce the number of newborns with macrosomia (Utz 2018).

### **Potential biases**

None of the included studies was categorized as low risk of bias in all seven domains only (see Table 6: Judgement on risk of bias available in the supplements).

The most common restriction on study quality was found in the domain performance bias due to a lack of blinding of participants and personnel in 48 studies. Detection bias due to blinding of the outcome assessors was judged as high or unclear in 38 studies. 14 studies with high risk of bias due to no blinding of participants and personnel, reported adequate methods to ensure blinding of the outcome assessors.

1  
2  
3 Another frequent problem was an incomplete analyses of outcome data in 26 studies  
4 defined as a loss to follow-up over 10 % of randomized participants or per-protocol  
5 analyses.  
6  
7

8 In 23 studies a protocol was available. Risk of bias due to selective outcome reporting  
9 was judged as low in 15 studies. High risk of bias, meaning lack of reporting of results  
10 of some pre-planned outcomes was judged in eight studies (Abdulrhman 2013, Beyuo  
11 2015, Elbarbary 2020, Matter 2020, Owolabi 2019, Somanah 2012, Utz 2018 Yakoot  
12 2019).  
13  
14

15 In the domain sequence generation, two studies were assessed as high risk. El- Nteleki  
16 2015 randomized only seven patients into three different treatment groups. Shamy  
17 2018 used a non-probability sampling method on the basis of the hospital admission  
18 code and was subsequently judged as high risk in domains sequence generation and  
19 allocation concealment.  
20  
21

22 In 31 studies, we identified further methodological limitations including missing  
23 reporting of information on sample-size calculation, definition of primary and secondary  
24 target criteria, relevant differences regarding baseline characteristics or reporting of  
25 intermediate results only.  
26  
27  
28  
29  
30  
31  
32  
33  
34  
35  
36  
37  
38  
39  
40  
41  
42  
43  
44  
45  
46  
47  
48  
49  
50  
51  
52  
53  
54  
55  
56  
57  
58  
59  
60

## DISCUSSION

This systematic review describes interventions from 60 studies to summarize the available evidence on strategies to prevent, diagnose and treat DM with a total of 12,113 participants from 15 African countries. Several promising interventions were identified, which could be useful to improve prevention, diagnosis and treatment, and thus, the prognosis of patients with diabetes.

Proven and effective actions to prevent or delay the onset of DM2 were based on the empowerment of the population, patients and health care providers (22). Recommended interventions include primary prevention programs with simple lifestyle measures to reduce consumption of sugar-sweetened beverages, mandatory detailed labels on food packaging as well as education and awareness campaigns to increase physical activity (23). Health systems must ensure technical and financial resources as well as training of healthcare staff to recognize the symptoms of DM, to perform and interpret diagnostic tests and provide adequate treatment and care (4). Concerning pharmacotherapy, prioritisation of metformin, gliclazide and human insulin is recommended (24). Glucometers, needles and test strips should be provided for people with DM (4). Only a fraction of patients have access to the same treatment as recommended in high-income countries (25, 26). Evidence-based guidelines support health care providers and stakeholders in their task to reduce population burden and improve clinical outcomes. Guidelines should be based on the observed spectrum of patients with DM and carefully contextualize interventions concerning specific socio-cultural and economic barriers and facilitators (27). At the moment, most guideline recommendations in LMIC are based on studies conducted in high-income Western countries (28). The need for research in LMIC including Africa has been recognized and may have led to the increasing number of published RCTs from African countries in recent years.

### Screening strategies to diagnose DM and its complications

The rate of undiagnosed patients with DM is estimated to be between 3.9 % in SSA (29) and 12 % in North Africa (30). This might be related to genetic disparities in the development level of the health care system and awareness in the general population (13). The high rates of undiagnosed DM highlight a high need for research on and implementation of DM screening strategies in the African context. We identified two studies to improve screening for DM and DM related complications (31-33). Both studies investigated different strategies in primary health care clinics to detect and manage women with GDM (31) and screen diabetic patients for complications (34). Utz 2018 detected a high prevalence of GDM with 23.7% of Moroccan pregnant women.

1  
2  
3 This underlines the importance of regular screening and management to enable early  
4 interventions at a primary care level (31). Screening strategies for diabetic  
5 complications in a diabetic population receiving primary care found a high rate of  
6 diabetic complications including retinopathy, maculopathy, neuropathy, nephropathy,  
7 possible infarction and severe erectile dysfunction (32-34). The high prevalence rates  
8 and the low rate of patients receiving recommended treatment by specialists resulted in  
9 non-relevant benefits on glucose control underlining the conclusions of two systematic  
10 reviews (7, 35) on the need to adapt preventive strategies to reduce DM and its  
11 complications.  
12  
13  
14  
15  
16

### 17 **Intervention for patients with pre-DM for primary prevention of DM**

18  
19  
20 We identified two studies on pre-DM patients (36, 37) with elevated blood glucose  
21 levels below diagnosis criteria of DM. RezkAllah et al. (37) were able to improve  
22 glucose levels via interval training. Krawinkel et al. (36) demonstrated reduced fasting  
23 plasma glucose levels in pre-DM using bitter melon, a plant with antidiabetic properties  
24 that is consumed in many Asian as well as some African countries. Pre-DM is strongly  
25 associated with the development of DM and thusly with its long-term consequences  
26 (38). Both studies offer effective strategies, but further research is necessary,  
27 exemplarily on early educational strategies, as a measure of patient empowerment and  
28 early tackling of DM (39).  
29  
30  
31  
32  
33

### 34 **Educational strategies for patients and health-care providers**

35  
36  
37 Since DM is a disease with complex challenges for patients and health care providers,  
38 educational campaigns are necessary to support health care providers and empower  
39 patients to manage their disease-associated decisions, lifestyle habits and medication  
40 use. Best benefits are proposed to be achieved by continuous individualized education,  
41 guided by patients' concerns, preferences and needs (22, 40).  
42  
43

44 We identified a couple of effective strategies, mainly for patients with DM2 (41-53), one  
45 for patients with DM1 (54) and one for pregnant women with GDM (31). Most of these  
46 studies investigated long-term interventions to supported patient empowerment based  
47 on improved knowledge, motivation, and capacity to take control of their disease (22).  
48 Three studies trialed nurse-led) (42, 48, 49, 55) and 2 studies investigated strategies to  
49 train healthcare providers in the management of patients with DM (56, 57).  
50  
51

52 In times of growing digitalization, modern communication technologies might have  
53 great potential to improve the accessibility of the African population to high-quality  
54 health care services where human resources are limited (58). The number of people  
55 having access to mobile services is already high and expected to rise over the next  
56  
57  
58  
59  
60

1  
2  
3 years (59). Lifestyle focused messages might be an effective low-cost option to keep  
4 patients motivated to adhere to healthy lifestyles (58). One small study (Takenga 2014)  
5 combined DM self-management with tele-medical approaches and stated a significant  
6 decrease of HbA1c levels (51). The application of telemedicine in different areas of DM  
7 management showed promising results in previous studies (60). Currently, the COVID-  
8 19 pandemic has forced all nations to implement alternative, oftentimes digital  
9 strategies including tele-monitoring and teleconsultation to continue care of NCDs (61).  
10 Improvement of patient empowerment resulted in improved adherence and glucose  
11 control, fewer admissions to healthcare facilities and lower costs. Only two studies  
12 reported on the quality of life with heterogeneous results (42, 55, 62). Adibe et al.  
13 (Adibe 2013) (42, 55) showed a benefit with an incremental gain in quality-adjusted life  
14 years (QALY) with improved cost-effectiveness of an additional structural self-care  
15 education program implemented by pharmacists, physicians and nurses. These  
16 findings are supported by results from two systematic reviews showing the usefulness  
17 of nurse-led interventions to reduce cardio-metabolic risk factors in adults with chronic  
18 conditions in Europe (63, 64).  
19 All included studies were adapted to local contexts and the trialed strategies are  
20 potentially adaptable to health care systems in other African and LMIC. Moreover, the  
21 tasks of nurses in NCD care could be redefined and expanded in countries with  
22 comparably few physicians in order to improve DM diagnostics, treatment and  
23 education with regards to local resources.

### 24 **Strategies to increase physical activity**

25 Seven studies (5 studies on DM2 (21, 65-68), 1 on DM1 (69) and 1 on GDM (70)) on  
26 exercise therapy showed generally positive results concerning effectiveness in  
27 glycemic control. Of the strategies to enhance physical activity, Fayehun 2018  
28 managed to improve glucose control by setting the goal to accumulate 10,000 steps  
29 per day, an intervention that does not require any cost-intensive infrastructure and still  
30 managed to show a significant decrease in HbA1c levels after 4 weeks (65). Similarly,  
31 Yan 2014 found one-hour walking per day to be equally effective as 3-5 times per day  
32 exercise training in HbA1c reduction. Physical activity is generally reviewed as a  
33 beneficial intervention in GDM (71), DM1 (72, 73) and DM2 (74, 75). Long-term  
34 adherence to this strategy needs to further be assessed.

### 35 **Pharmacological strategies**

36 We identified only six studies (3 studies on DM2 (76-78), 3 on GDM (79-81)) on  
37 pharmacological interventions as a central part of DM care (82) despite known  
38  
39  
40  
41  
42  
43  
44  
45  
46  
47  
48  
49  
50  
51  
52  
53  
54  
55  
56  
57  
58  
59  
60

1  
2  
3 differences in DM between African and European Americans (13). This can be due to  
4 the exclusion criteria as we excluded international studies with few sites in African  
5 countries (e.g. (83-88)). Most of the major pharmacological studies only have a few  
6 study centers in Africa. Thus, such research is important and more studies like this  
7 should be conducted in Africa as it is known that among different ethnic and racial  
8 groups the response to drugs can vary. Studies like this could lead to a prioritized use  
9 of medications, which are known to show a good response in African population. El-  
10 Hagggar et al. (77) investigated the addition of ketotifen in obese DM2 patients to  
11 glimepiride treatment showing beneficial effects. The beneficial effect of ketotifen as a  
12 mast cell stabilizer has been studied in mice receiving a Western diet and diabetic rats  
13 resulting in a significant reduction of weight gain and glycemic parameters (89, 90).  
14 Further research is necessary to generate more detailed evidence on the use of  
15 ketotifen in diabetic patients.

16  
17 Malek 2015 (78) reported the usability and safety of a basal-bolus insulin regime with  
18 stepwise intensification in an African setting as an easy to handle, practical option for  
19 DM care. The efficacy of basal-bolus insulin regimes has been previously described in  
20 other settings (91, 92). Currently, the available research on pharmacological  
21 interventions for DM is sparse in Africa. Further research should consider regional  
22 contexts like availability of medication, practicability of the medication (e.g. insulin  
23 needs proper storage (93, 94)) lifestyle habits and genetics (95, 96). Consideration of  
24 findings from African American cohorts seems advisable (97, 98). Three studies on  
25 women with gestational DM (79-81) tested metformin-based regimes (with or without  
26 insulin support) vs. insulin-only regimes. Metformin-based therapy regimes generally  
27 showed similar results compared to insulin-only regimes concerning glycemic control.  
28 The effectiveness and safety of metformin in GDM has been detailed in other  
29 systematic reviews (99, 100).

### 24 25 26 27 28 29 30 31 32 33 34 35 36 37 38 39 40 41 42 43 44 45 **Strategies on nutrition and food supplementations**

46  
47 Four small studies tested different nutritional interventions (36, 101-103), mainly for  
48 children and adolescents with DM1 (101-103) with promising results of long-term  
49 consumption of honey (101) and camel milk (102) and a low fat and protein content of  
50 meals (103) on metabolic control for DM1 patients. Especially the positive effects of  
51 camel milk, based on the traditional treatment of DM in arid areas of Africa and Asia,  
52 may offer an interesting management strategy to improve glycemic control, reduce  
53 insulin requirement and limit diabetic complications (104). The study on bitter gourd  
54 consumption for persons with pre-DM (Krawinkel 2018) (36) was discussed above.

1  
2  
3 The twelve included studies on food supplementations (2 for DM1, 10 for DM2) showed  
4 some promising results for different adjuvant DM therapies including zinc-gluconate  
5 (105) and zinc-chromium (106) supplementations, ginger powder (107), Nigella sativa  
6 oil capsules (108), L-carnitine (109), L-carnosine (110) as well as vitamin B, C or D  
7 supplementation (62, 111-113) on glycemic control. These results are in line with  
8 previous results from systematic reviews showing benefits in the prevention of DM and  
9 improved glycemic control, lipid profiles and management of DM-related complications  
10 (114-126). On the other hand, beneficial effects on glycemic control shown in two  
11 studies on vitamin D3 supplementation contrasts findings from recent systematic  
12 reviews (127, 128).

13  
14  
15  
16  
17  
18  
19 New evidence was generated by Rashad 2017 (129) who stated the beneficial effects  
20 of *balanites aegyptiaca* (desert date) extract on glycemic control. This evergreen tree is  
21 common in arid regions in Africa and was traditionally used in Egyptian traditional  
22 medicine. Helal et al. described similar results in diabetic rats (130).

### 23 24 25 26 27 **Strategies on the treatment of DM related complications**

28 Three studies tested the role of periodontitis treatment in diabetic patients (131-133).  
29 Tsobgny-Tsague et al. (133) and El-Makaky et al. (131) described the importance of  
30 early treatment start, resulting in favorable patient outcomes in periodontal health and  
31 glucose control. El-Sharkawy et al. (132) found propolis to be a favorable addition to  
32 planing and scaling. In an Ethiopian cohort, only 21% of DM patients received oral  
33 health screening (134). The WHO regards oral health as a crucial component of health  
34 care with 12-14 % of 35 to 44-year-old Africans suffering from periodontitis (135).

35  
36  
37  
38  
39  
40  
41  
42  
43  
44  
45  
46  
47  
48  
49  
50  
51  
52  
53  
54  
55  
56  
57  
58  
59  
60  
61  
62  
63  
64  
65  
66  
67  
68  
69  
70  
71  
72  
73  
74  
75  
76  
77  
78  
79  
80  
81  
82  
83  
84  
85  
86  
87  
88  
89  
90  
91  
92  
93  
94  
95  
96  
97  
98  
99  
100  
101  
102  
103  
104  
105  
106  
107  
108  
109  
110  
111  
112  
113  
114  
115  
116  
117  
118  
119  
120  
121  
122  
123  
124  
125  
126  
127  
128  
129  
130  
131  
132  
133  
134  
135  
136  
137  
138  
139  
140  
141  
142  
143  
144  
145  
146  
147  
148  
149  
150  
151  
152  
153  
154  
155  
156  
157  
158  
159  
160  
161  
162  
163  
164  
165  
166  
167  
168  
169  
170  
171  
172  
173  
174  
175  
176  
177  
178  
179  
180  
181  
182  
183  
184  
185  
186  
187  
188  
189  
190  
191  
192  
193  
194  
195  
196  
197  
198  
199  
200  
201  
202  
203  
204  
205  
206  
207  
208  
209  
210  
211  
212  
213  
214  
215  
216  
217  
218  
219  
220  
221  
222  
223  
224  
225  
226  
227  
228  
229  
230  
231  
232  
233  
234  
235  
236  
237  
238  
239  
240  
241  
242  
243  
244  
245  
246  
247  
248  
249  
250  
251  
252  
253  
254  
255  
256  
257  
258  
259  
260  
261  
262  
263  
264  
265  
266  
267  
268  
269  
270  
271  
272  
273  
274  
275  
276  
277  
278  
279  
280  
281  
282  
283  
284  
285  
286  
287  
288  
289  
290  
291  
292  
293  
294  
295  
296  
297  
298  
299  
300  
301  
302  
303  
304  
305  
306  
307  
308  
309  
310  
311  
312  
313  
314  
315  
316  
317  
318  
319  
320  
321  
322  
323  
324  
325  
326  
327  
328  
329  
330  
331  
332  
333  
334  
335  
336  
337  
338  
339  
340  
341  
342  
343  
344  
345  
346  
347  
348  
349  
350  
351  
352  
353  
354  
355  
356  
357  
358  
359  
360  
361  
362  
363  
364  
365  
366  
367  
368  
369  
370  
371  
372  
373  
374  
375  
376  
377  
378  
379  
380  
381  
382  
383  
384  
385  
386  
387  
388  
389  
390  
391  
392  
393  
394  
395  
396  
397  
398  
399  
400  
401  
402  
403  
404  
405  
406  
407  
408  
409  
410  
411  
412  
413  
414  
415  
416  
417  
418  
419  
420  
421  
422  
423  
424  
425  
426  
427  
428  
429  
430  
431  
432  
433  
434  
435  
436  
437  
438  
439  
440  
441  
442  
443  
444  
445  
446  
447  
448  
449  
450  
451  
452  
453  
454  
455  
456  
457  
458  
459  
460  
461  
462  
463  
464  
465  
466  
467  
468  
469  
470  
471  
472  
473  
474  
475  
476  
477  
478  
479  
480  
481  
482  
483  
484  
485  
486  
487  
488  
489  
490  
491  
492  
493  
494  
495  
496  
497  
498  
499  
500  
501  
502  
503  
504  
505  
506  
507  
508  
509  
510  
511  
512  
513  
514  
515  
516  
517  
518  
519  
520  
521  
522  
523  
524  
525  
526  
527  
528  
529  
530  
531  
532  
533  
534  
535  
536  
537  
538  
539  
540  
541  
542  
543  
544  
545  
546  
547  
548  
549  
550  
551  
552  
553  
554  
555  
556  
557  
558  
559  
560  
561  
562  
563  
564  
565  
566  
567  
568  
569  
570  
571  
572  
573  
574  
575  
576  
577  
578  
579  
580  
581  
582  
583  
584  
585  
586  
587  
588  
589  
590  
591  
592  
593  
594  
595  
596  
597  
598  
599  
600  
601  
602  
603  
604  
605  
606  
607  
608  
609  
610  
611  
612  
613  
614  
615  
616  
617  
618  
619  
620  
621  
622  
623  
624  
625  
626  
627  
628  
629  
630  
631  
632  
633  
634  
635  
636  
637  
638  
639  
640  
641  
642  
643  
644  
645  
646  
647  
648  
649  
650  
651  
652  
653  
654  
655  
656  
657  
658  
659  
660  
661  
662  
663  
664  
665  
666  
667  
668  
669  
670  
671  
672  
673  
674  
675  
676  
677  
678  
679  
680  
681  
682  
683  
684  
685  
686  
687  
688  
689  
690  
691  
692  
693  
694  
695  
696  
697  
698  
699  
700  
701  
702  
703  
704  
705  
706  
707  
708  
709  
710  
711  
712  
713  
714  
715  
716  
717  
718  
719  
720  
721  
722  
723  
724  
725  
726  
727  
728  
729  
730  
731  
732  
733  
734  
735  
736  
737  
738  
739  
740  
741  
742  
743  
744  
745  
746  
747  
748  
749  
750  
751  
752  
753  
754  
755  
756  
757  
758  
759  
760  
761  
762  
763  
764  
765  
766  
767  
768  
769  
770  
771  
772  
773  
774  
775  
776  
777  
778  
779  
780  
781  
782  
783  
784  
785  
786  
787  
788  
789  
790  
791  
792  
793  
794  
795  
796  
797  
798  
799  
800  
801  
802  
803  
804  
805  
806  
807  
808  
809  
810  
811  
812  
813  
814  
815  
816  
817  
818  
819  
820  
821  
822  
823  
824  
825  
826  
827  
828  
829  
830  
831  
832  
833  
834  
835  
836  
837  
838  
839  
840  
841  
842  
843  
844  
845  
846  
847  
848  
849  
850  
851  
852  
853  
854  
855  
856  
857  
858  
859  
860  
861  
862  
863  
864  
865  
866  
867  
868  
869  
870  
871  
872  
873  
874  
875  
876  
877  
878  
879  
880  
881  
882  
883  
884  
885  
886  
887  
888  
889  
890  
891  
892  
893  
894  
895  
896  
897  
898  
899  
900  
901  
902  
903  
904  
905  
906  
907  
908  
909  
910  
911  
912  
913  
914  
915  
916  
917  
918  
919  
920  
921  
922  
923  
924  
925  
926  
927  
928  
929  
930  
931  
932  
933  
934  
935  
936  
937  
938  
939  
940  
941  
942  
943  
944  
945  
946  
947  
948  
949  
950  
951  
952  
953  
954  
955  
956  
957  
958  
959  
960  
961  
962  
963  
964  
965  
966  
967  
968  
969  
970  
971  
972  
973  
974  
975  
976  
977  
978  
979  
980  
981  
982  
983  
984  
985  
986  
987  
988  
989  
990  
991  
992  
993  
994  
995  
996  
997  
998  
999  
1000

### 51 52 **Strength and limitations**

53 The external validity of this systematic review is limited by the focus on a limited  
54 number of countries and urban health care setting. The included studies were set in 15  
55 of the 54 African countries with a focus on the North African region, especially Egypt.  
56 Egypt is the country with the highest known prevalence of DM in the African continent  
57 (4). This might be related to economic expansion and urbanization, but also due to

1  
2  
3 specific dietary issues (e.g. white bread, polished rice, trans fats), reduced physical  
4 activity due to prohibition of exercise in public places, shortage of exercise facilities,  
5 poor physical education in schools. Poor diet and physical inactivity are causing a high  
6 rate of overweight and obesity among the Egyptian population (141).  
7  
8

9 The broad majority of included studies was conducted in urban settings, this is likely  
10 due to the better health care infrastructure and thusly the increased practicability of  
11 research. Health care workers, including doctors and nurses, seem to prefer providing  
12 services in urban areas leading to an even higher deficit of health care access in rural  
13 areas. The consequence is limited generalizability of the results on the needs of the  
14 rural population. People living in rural areas are rather diagnosed at an advanced stage  
15 of the disease and more likely to already suffer from DM related micro-and/or  
16 macrovascular complications (6). On the other hand, people living in rural areas  
17 probably perform more exercise, consume less processed food and are less obese  
18 with resulting lower incidence of DM.  
19  
20  
21  
22  
23  
24

25 Our pre-planned primary outcome was mortality which was not reported in any of the  
26 included studies. Since DM is a chronic disease with a slow progression and long-term  
27 development of organ damage, the survival time is higher than the follow-up time of  
28 most of the studies. The included studies looked at long-term treatment strategies  
29 rather than treatment for acute hypo- or hyperglycemic events that can lead to acutely  
30 fatal events. Nevertheless, long-term glucose control, being represented by the HbA1c  
31 value is one of the strongest clinical-outcome indicators of efficient DM management  
32 and health outcomes (142). It is easy to measure and serves as a representation of the  
33 individual's average blood glucose levels in the previous 3 months (142).  
34  
35  
36  
37  
38

39 This systematic review includes studies as the highest level of evidence to investigate  
40 the benefits and harms of interventions (143). We included studies published in the  
41 English language without time restrictions. Language bias was shown to be unlikely.  
42 Despite the high linguistic diversity on the African continent, the languages mostly  
43 spoken are English, Arabic, and French (144). Eventually, we did not exclude any  
44 study due to the publication language.  
45  
46  
47  
48  
49

## 50 **CONCLUSION**

51 This systematic review shows an increasing number of studies due to the rising  
52 prevalence and awareness of DM in African countries. However, the number of high-  
53 quality studies to improve prevention, early diagnoses and treatment and thus, the  
54 prognosis of African patients with DM is still low. Available studies are not  
55 representative of all African regions and were mainly conducted in urban areas.  
56 Especially primary care settings are underrepresented.  
57  
58  
59  
60



1  
2  
3 An improvement of the prognosis of DM patients in Africa requires adequate technical  
4 and financial resources, training of healthcare staff and the implementation of  
5 comprehensive strategies to improve early diagnostics, adherence to medical  
6 treatment and subsequent regular checks. The identified studies offer a variety of  
7 effective approaches as a basis for local guidelines in the different fields of action in  
8 DM care adjusted to regional circumstances.  
9  
10  
11  
12

### 13 14 **Ethics approval**

15  
16 No ethical approval is necessary  
17  
18

### 19 **Authors contribution**

20  
21 Sandholzer-Yilmaz AS developed the concept of the review, performed the initial  
22 systematic search in the International Trials Registry, screened the references,  
23 extracted study data in 2019, wrote a draft of the manuscript and worked in the  
24 coauthors comments on the final version of the manuscript and finally submitted the  
25 manuscript.  
26  
27

28  
29 Kroeber ES updated the systematic search, added a search in 2 regional databases,  
30 screened the updated search results and extracted the updated data and wrote the  
31 final version of the manuscript.  
32  
33

34 Unverzagt S has expertise in systematic reviews and is the guarantor of the  
35 methodological quality of the systematic review, developed the review concept has  
36 registered the protocol, performed the systematic search in 2 databases, screened all  
37 references, checked the initial as well as the updated data extraction and wrote the  
38 final version of this manuscript.  
39  
40

41  
42 Ayele W provided expertise on the needs of evidence in the African context, developed  
43 the review concept, discussed the protocol and critically read and commented on the  
44 manuscript.  
45  
46

47 Frese T and provided expertise on primary care, developed the review concept,  
48 critically read and commented on the manuscript.  
49

50 Kantelhardt EJ provided expertise on the needs of evidence in the African context,  
51 developed the review concept, critically read and commented on the manuscript.  
52

53 The authors wish it to be known that, in their opinion, the first 2 authors should be  
54 regarded as joint first authors.  
55  
56

### 57 **Acknowledgements:**

58  
59 Dawn Bielawski did the proofreading.  
60

## Funding statement

This research received no specific grant from any funding agency in the public, commercial or not-for-profit sectors.

For peer review only

## References

1. Kushitor MK, Boatemaa S. The double burden of disease and the challenge of health access: Evidence from Access, Bottlenecks, Cost and Equity facility survey in Ghana. *PLoS One*. 2018;13(3):e0194677.
2. Misganaw A, Mariam DH, Araya T. The double mortality burden among adults in Addis Ababa, Ethiopia, 2006-2009. *Prev Chronic Dis*. 2012;9.
3. Roth GA, Abate D, Abate KH, et al. Global, regional, and national age-sex-specific mortality for 282 causes of death in 195 countries and territories, 1980–2017: a systematic analysis for the Global Burden of Disease Study 2017. *The Lancet*. 2018;392(10159):1736-88.
4. International Diabetes Federation. IDF Diabetes Atlas, 9th edn. Brussels, Belgium: 2019. Available at: <https://www.diabetesatlas.org>. Accessed 7 Aug 2020
5. Beagley J, Guariguata L, Weil C, et al. Global estimates of undiagnosed diabetes in adults. *Diabetes Res Clin Pract*. 2014;103(2):150-60.
6. Asmelash D, Asmelash Y. The Burden of Undiagnosed Diabetes Mellitus in Adult African Population: A Systematic Review and Meta-Analysis. *J Diabetes Res*. 2019;2019:4134937.
7. Bos M, Agyemang C. Prevalence and complications of diabetes mellitus in Northern Africa, a systematic review. *BMC public health*. 2013;13(1):387.
8. Awadalla H, Noor SK, Elmadhoun WM, et al. Diabetes complications in Sudanese individuals with type 2 diabetes: overlooked problems in sub-Saharan Africa? *Diabetes Metab Syndr*. 2017;11:S1047-S51.
9. Mutyambizi C, Pavlova M, Chola L, et al. Cost of diabetes mellitus in Africa: a systematic review of existing literature. *Globalization and Health*. 2018;14(1):3.
10. Clark A, Jit M, Warren-Gash C, et al. Global, regional, and national estimates of the population at increased risk of severe COVID-19 due to underlying health conditions in 2020: a modelling study. *Lancet Glob Health*. 2020;8(8):e1003-e17.
11. Nations U. Sustainable development goals. Goal 3: Ensure healthy living and promote well-being for all at all ages 2019. Available from: <https://www.un.org/sustainabledevelopment/health/>. Accessed 29 Sep 2020
12. Cosentino F, Grant PJ, Aboyans V, et al. 2019 ESC Guidelines on diabetes, pre-diabetes, and cardiovascular diseases developed in collaboration with the EASD: The Task Force for diabetes, pre-diabetes, and cardiovascular diseases of the European Society of Cardiology (ESC) and the European Association for the Study of Diabetes (EASD). *Eur Heart J*. 2020;41(2):255-323.
13. Gomez F, Hirbo J, Tishkoff SA. Genetic variation and adaptation in Africa: implications for human evolution and disease. *Cold Spring Harb Perspect Biol*. 2014;6(7):a008524.
14. Owolabi MO, Yaria JO, Daivadanam M, et al. Gaps in guidelines for the management of diabetes in low-and middle-income versus high-income countries—a systematic review. *Diabetes Care*. 2018;41(5):1097-105.
15. Moher D, Liberati A, Tetzlaff J, et al. Preferred reporting items for systematic reviews and meta-analyses: the PRISMA statement. *PLoS med*. 2009;6(7):e1000097.
16. Higgins JPT, Thomas J, Chandler J, et al. Cochrane handbook for systematic reviews of interventions version 5.1. 0 [updated March 2011]. Collaboration TC, editor. Available from [www.handbook.cochrane.org](http://www.handbook.cochrane.org). Accessed 8 March 2020.
17. Moher D, Hopewell S, Schulz KF, et al. CONSORT 2010 explanation and elaboration: updated guidelines for reporting parallel group randomised trials. *Int J Surg*. 2012;10(1):28-55.
18. Team TE. EndNote. EndNote X9 ed. Philadelphia, PA: Clarivate; 2013.
19. Higgins JPT, Eldridge S, Li Te. Chapter 23: Including variants on randomized trials. In: Higgins JPT, Thomas J, Chandler J, Cumpston M, Li T, Page MJ, et al.,

- 1  
2  
3 editors. Cochrane Handbook for Systematic Reviews of Interventions version 61  
4 (updated September 2020. [www.training.cochrane.org/handbook](http://www.training.cochrane.org/handbook). Accessed 9 March  
5 2020.
- 6 20. Review Manager (RevMan) [Computer program]. Version 5.3. Copenhagen:  
7 The Nordic Cochrane Centre, The Cochrane Collaboration, 2014.
- 8 21. Asuako B, Moses MO, Eghan BA, et al. Fasting plasma glucose and lipid  
9 profiles of diabetic patients improve with aerobic exercise training. *Ghana Med J.*  
10 2017;51(3):120-7.
- 11 22. Gómez-Velasco DV, Almeda-Valdes P, Martagón AJ, et al. Empowerment of  
12 patients with type 2 diabetes: current perspectives. *Diabetes Metab Syndr Obes.*  
13 targets and therapy. 2019;12:1311.
- 14 23. Audain KA, Levy L, Ellahi B. Sugar sweetened beverage consumption in the  
15 early years and implications for type 2 diabetes: A sub-Saharan Africa context. *Proc*  
16 *Nutr Soc.* 2019;78(4):547-53.
- 17 24. World Health Organization. The WHO model list of essential medicines: 21st list  
18 2019. World Health Organization; 2019.  
19 [https://apps.who.int/iris/bitstream/handle/10665/325771/WHO-MVP-EMP-IAU-2019.06-](https://apps.who.int/iris/bitstream/handle/10665/325771/WHO-MVP-EMP-IAU-2019.06-eng.pdf)  
20 [eng.pdf](https://apps.who.int/iris/bitstream/handle/10665/325771/WHO-MVP-EMP-IAU-2019.06-eng.pdf). Accessed 30 Jan 2021
- 21 25. American Diabetes Association. Classification and Diagnosis of Diabetes:  
22 Standards of Medical Care in Diabetes. *Diabetes Care.* 2020;43(Suppl 1):S14.
- 23 26. Roglic G. WHO Global report on diabetes: A summary. *IJNCD.* 2016;1(1):3.
- 24 27. Owolabi MO, Yaria JO, Daivadanam M, et al. Gaps in Guidelines for the  
25 Management of Diabetes in Low- and Middle-Income Versus High-Income Countries-A  
26 Systematic Review. *Diabetes Care.* 2018;41(5):1097-105.
- 27 28. Checkley W, Ghannem H, Irazola V, et al. Management of NCD in low-and  
28 middle-income countries. *Glob Heart.* 2014;9(4):431-43.
- 29 29. International Diabetes Federation. IDF Diabetes Atlas. Africa  
30 [https://diabetesatlas.org/upload/resources/material/20191218\\_144539\\_afr\\_factsheet\\_e](https://diabetesatlas.org/upload/resources/material/20191218_144539_afr_factsheet_en.pdf2019)  
31 [n.pdf2019](https://diabetesatlas.org/upload/resources/material/20191218_144539_afr_factsheet_en.pdf2019). Accessed 21 Sep 2020.
- 32 30. International Diabetes Federation. IDF Diabetes Atlas. Middle East and North  
33 Africa  
34 [https://www.diabetesatlas.org/upload/resources/material/20191218\\_144557\\_mena\\_fac](https://www.diabetesatlas.org/upload/resources/material/20191218_144557_mena_factsheet_en.pdf2019)  
35 [tsheet\\_en.pdf2019](https://www.diabetesatlas.org/upload/resources/material/20191218_144557_mena_factsheet_en.pdf2019). Accessed 21 Sep 2020.
- 36 31. Utz B, Assarag B, Smekens T, et al. Detection and initial management of  
37 gestational diabetes through primary health care services in Morocco: An  
38 effectiveness-implementation trial. *PloS one.* 2018;13(12):e0209322.
- 39 32. Webb EM, Rheeder P. A cluster-randomized trial to estimate the effect of  
40 mobile screening and treatment feedback on HbA1c and diabetes-related  
41 complications in Tshwane primary health care clinics, South Africa. *Prim Care*  
42 *Diabetes.* 2017;11(6):546-54.
- 43 33. Webb EM, Rheeder P, Roux P. Screening in Primary Care for Diabetic  
44 Retinopathy, Maculopathy and Visual Loss in South Africa. *Ophthalmologica.*  
45 2016;235(3):141-9.
- 46 34. Webb EM, Rheeder P, Van Zyl DG. Diabetes care and complications in primary  
47 care in the Tshwane district of South Africa. *Prim Care Diabetes.* 2015;9(2):147-54.
- 48 35. Wagnev F, Eshetie S, Kibret GD, et al. Diabetic nephropathy and hypertension  
49 in diabetes patients of sub-Saharan countries: a systematic review and meta-analysis.  
50 *BMC Res Notes.* 2018;11(1):565.
- 51 36. Krawinkel MB, Ludwig C, Swai ME, et al. Bitter gourd reduces elevated fasting  
52 plasma glucose levels in an intervention study among prediabetics in Tanzania. *J*  
53 *Ethnopharmacol.* 2018;216:1-7.
- 54 37. RezkAllah SS, Takla MK. Effects of different dosages of interval training on  
55 glycemic control in people with prediabetes: a randomized controlled trial. *Diabetes*  
56 *Spectr.* 2019;32(2):125-31.
- 57  
58  
59  
60

- 1  
2  
3 38. Bansal N. Prediabetes diagnosis and treatment: A review. *World J Diabetes*.  
4 2015;6(2):296.
- 5 39. Mogueo A, Oga - Omenka C, Hatem M, et al. Effectiveness of interventions  
6 based on patient empowerment in the control of type 2 diabetes in sub-Saharan Africa:  
7 A review of randomized controlled trials. *Endocrinol, Diabetes Metab J*. e00174.
- 8 40. Beck J, Greenwood DA, Blanton L, et al. 2017 National Standards for Diabetes  
9 Self-Management Education and Support. *Diabetes Educ*. 2018;44(1):35-50.
- 10 41. Abaza H, Marschollek M, Schulze M. SMS Education for the Promotion of  
11 Diabetes Self-Management in Low & Middle Income Countries: A Randomized  
12 Controlled Trial in Egypt. *Stud Health Technol Inform*. 2017;245:1209.
- 13 42. Adibe MO, Ukwe CV, Aguwa CN. The Impact of Pharmaceutical Care  
14 Intervention on the Quality of Life of Nigerian Patients Receiving Treatment for Type 2  
15 Diabetes. *Value in Health Reg Issues*. 2013;2(2):240-7.
- 16 43. Adjei DN, Agyemang C, Dasah JB, et al. The effect of electronic reminders on  
17 risk management among diabetic patients in low resourced settings. *J Diabetes  
18 Complications*. 2015;29(6):818-21.
- 19 44. Amendezo E, Walker Timothy D, Karamuka V, et al. Effects of a lifestyle  
20 education program on glycemic control among patients with diabetes at Kigali  
21 University Hospital, Rwanda: A randomized controlled trial. *Diabetes Res Clin Pract*.  
22 2017;126:129-37.
- 23 45. Chraibi A, Al-Herz S, Nguyen BD, et al. An RCT Investigating Patient-Driven  
24 Versus Physician-Driven Titration of BIAsp 30 in Patients with Type 2 Diabetes  
25 Uncontrolled Using NPH Insulin. *Diabetes Ther*. 2017;8(4):767-80.
- 26 46. Debussche X, Besancon S, Balcou-Debussche M, et al. Structured peer-led  
27 diabetes self-management and support in a low-income country: The ST2EP  
28 randomised controlled trial in Mali. *PLoS One*. 2018;13(1):e0191262.
- 29 47. Essien O, Otu A, Umoh V, et al. Intensive Patient Education Improves  
30 Glycaemic Control in Diabetes Compared to Conventional Education: A Randomised  
31 Controlled Trial in a Nigerian Tertiary Care Hospital. *Plos One*. 2017;12(1):e0168835.
- 32 48. Hailu FB, Hjortdahl P, Moen A. Nurse-Led Diabetes Self-Management  
33 Education Improves Clinical Parameters in Ethiopia. *Front Public Health*. 2018;6:302.
- 34 49. Labhardt ND, Balo JR, Ndam M, et al. Improved retention rates with low-cost  
35 interventions in hypertension and diabetes management in a rural African environment  
36 of nurse-led care: a cluster-randomised trial. *Trop Med Int Health*. 2011;16(10):1276-  
37 84.
- 38 50. Mash RJ, Rhode H, Zwarenstein M, et al. Effectiveness of a group diabetes  
39 education programme in under-served communities in South Africa: a pragmatic cluster  
40 randomized controlled trial. *Diabetic Med*. 2014;31(8):987-93.
- 41 51. Takenga C, Berndt RD, Musongya O, et al. An ICT-Based Diabetes  
42 Management System Tested for Health Care Delivery in the African Context. *Int J  
43 Telemed Appl*. 2014;2014:437307.
- 44 52. Tawfik MY, Mohamed RA. The impact of communicating cardiovascular risk in  
45 type 2 diabetics on patient risk perception, diabetes self-care, glycosylated hemoglobin,  
46 and cardiovascular risk. *J Public Health (Berl.)*. 2016;24(2):153-64.
- 47 53. Thuita AW, Kiage BN, Onyango AN, et al. Effect of a nutrition education  
48 programme on the metabolic syndrome in type 2 diabetes mellitus patients at a level 5  
49 Hospital in Kenya: "a randomized controlled trial". *BMC Nutr*. 2020;6:30.
- 50 54. Malipa M, Menon J. The relationship between compliance and quality of life  
51 among adolescents with diabetes mellitus type1. *Medical J Zambia*. 2013;40(3):93-103.
- 52 55. Adibe MO, Aguwa CN, Ukwe CV. Cost-Utility Analysis of Pharmaceutical Care  
53 Intervention Versus Usual Care in Management of Nigerian Patients with Type 2  
54 Diabetes. *Value Health Reg Issues*. 2013;2(2):189-98.
- 55 56. Fairall LR, Folb N, Timmerman V, et al. Educational Outreach with an  
56 Integrated Clinical Tool for Nurse-Led Non-communicable Chronic Disease  
57  
58  
59  
60

1  
2  
3 Management in Primary Care in South Africa: a Pragmatic Cluster Randomised  
4 Controlled Trial. *Plos medicine*. 2016;13(11):e1002178.

5 57. Steyn K, Lombard C, Gwebushe N, et al. Implementation of national guidelines,  
6 incorporated within structured diabetes and hypertension records at primary level care  
7 in Cape Town, South Africa: a randomised controlled trial. *Glob Health Action*.  
8 2013;6:20796.

9 58. Haider R, Sudini L, Chow CK, et al. Mobile phone text messaging in improving  
10 glycaemic control for patients with type 2 diabetes mellitus: A systematic review and  
11 meta-analysis. *Diabetes Res Clin Pract*. 2019;150:27-37.

12 59. The Mobile Economy. The Mobile Economy Sub-Saharan Africa 2019.  
13 <https://www.gsma.com/mobileeconomy/sub-saharan-africa/>. Accessed 31 Aug 2020.

14 60. Tcherro H, Kangambega P, Briatte C, et al. Clinical effectiveness of telemedicine  
15 in diabetes mellitus: a meta-analysis of 42 randomized controlled trials. *Telemed J E*  
16 *Health*. 2019;25(7):569-83.

17 61. Rodriguez T. Telemedicine for Diabetes Management During the COVID-19  
18 Pandemic and Beyond- Endocrinology Advisor. 2020.  
19 [https://www.endocrinologyadvisor.com/home/topics/diabetes/telemedicine-for-diabetes-](https://www.endocrinologyadvisor.com/home/topics/diabetes/telemedicine-for-diabetes-management-update-and-interviews/)  
20 [management-update-and-interviews/](https://www.endocrinologyadvisor.com/home/topics/diabetes/telemedicine-for-diabetes-management-update-and-interviews/). Accessed 7 Aug 2020.

21 62. Ragheb SR, El Wakeel LM, Nasr MS, et al. Impact of Rutin and Vitamin C  
22 combination on oxidative stress and glycemic control in patients with type 2 diabetes.  
23 *Clin Nutr ESPEN*. 2020;35:128-35.

24 63. Shaw RJ, McDuffie JR, Hendrix CC, et al. Effects of nurse-managed protocols  
25 in the outpatient management of adults with chronic conditions: a systematic review  
26 and meta-analysis. *Ann Intern Med*. 2014;161(2):113-21.

27 64. Daly B, Tian CJL, Scragg RKR. Effect of nurse-led randomised control trials on  
28 cardiovascular risk factors and HbA1c in diabetes patients: a meta-analysis. *Diabetes*  
29 *Res Clin Pract*. 2017;131:187-99.

30 65. Fayehun AF, Olowookere OO, Ogunbode AM, et al. Walking prescription of 10  
31 000 steps per day in patients with type 2 diabetes mellitus: a randomised trial in  
32 Nigerian general practice. *Br J Gen Pract*. 2018;68(667):e139-e45.

33 66. Maharaj SS, Nuhu JM. Rebound exercise: A beneficial adjuvant for sedentary  
34 non-insulin-dependent type 2 diabetic individuals in a rural environment. *Aust J Rural*  
35 *Health*. 2016;24(2):123-9.

36 67. van Rooijen AJ, Rheeder P, Eales CJ, et al. Effect of exercise versus relaxation  
37 on haemoglobin A1C in Black females with type 2 diabetes mellitus. *Qjm*.  
38 2004;97(6):343-51.

39 68. Yan H, Prista A, Ranadive SM, et al. Effect of Aerobic Training on Glucose  
40 Control and Blood Pressure in T2DDM East African Males. *Isrn Endocrinology Print*.  
41 2014;2014:864897.

42 69. Salem MA, Aboelasar MA, Elbarbary NS, et al. Is exercise a therapeutic tool  
43 for improvement of cardiovascular risk factors in adolescents with type 1 diabetes  
44 mellitus? A randomised controlled trial. *Diabetol Metab Syndr*. 2010;2(1):47.

45 70. Embaby H, Elsayed E, Fawzy M. Insulin Sensitivity and Plasma Glucose  
46 Response to Aerobic Exercise in Pregnant Women at Risk for Gestational Diabetes  
47 Mellitus. *Ethiop J Health Sci*. 2016;26(5):409-14.

48 71. Russo LM, Nobles C, Ertel KA, et al. Physical activity interventions in pregnancy  
49 and risk of gestational diabetes mellitus: a systematic review and meta-analysis. *Obstet*  
50 *Gynecol*. 2015;125(3):576-82.

51 72. Quirk H, Blake H, Tennyson R, et al. Physical activity interventions in children  
52 and young people with type 1 diabetes mellitus: a systematic review with meta -  
53 analysis. *Diabet Med*. 2014;31(10):1163-73.

54 73. Aljawarneh YM, Wardell DW, Wood GL, et al. A systematic review of physical  
55 activity and exercise on physiological and biochemical outcomes in children and  
56 adolescents with type 1 diabetes. *J Nurse Scholarsh*. 2019;51(3):337-45.

- 1  
2  
3 74. Pan B, Ge L, Xun Y-q, et al. Exercise training modalities in patients with type 2  
4 diabetes mellitus: a systematic review and network meta-analysis. *Int J Behav Nutr*  
5 *Phys Act.* 2018;15(1):72.
- 6 75. Smith AD, Crippa A, Woodcock J, et al. Physical activity and incident type 2  
7 diabetes mellitus: a systematic review and dose-response meta-analysis of  
8 prospective cohort studies. *Springer.* 2016.
- 9 76. Distiller LA, Nortje H, Wellmann H, et al. A 24-week, prospective, randomized,  
10 open-label, treat-to-target pilot study of obese type 2 diabetes patients with severe  
11 insulin resistance to assess the addition of exenatide on the efficacy of U-500 regular  
12 insulin plus metformin. *Endocr Pract.* 2014;20(11):1143-50.
- 13 77. El-Haggag SM, Farrag WF, Kotkata FA. Effect of ketotifen in obese patients with  
14 type 2 diabetes mellitus. *J Diabetes Complications.* 2015;29(3):427-32.
- 15 78. Malek R, Ajili F, Assaad-Khalil SH, et al. Similar glucose control with basal-  
16 bolus regimen of insulin detemir plus insulin aspart and thrice-daily biphasic insulin  
17 aspart 30 in insulin-naive patients with type 2 diabetes: Results of a 50-week  
18 randomized clinical trial of stepwise insulin intensification. *Diabetes Metab.*  
19 2015;41(3):223-30.
- 20 79. Ashoush S, El-Said M, Fathi H, et al. Identification of metformin poor  
21 responders, requiring supplemental insulin, during randomization of metformin versus  
22 insulin for the control of gestational diabetes mellitus. *J Obstet Gynaecol Res.*  
23 2016;42(6):640-7.
- 24 80. Beyuo T, Obed SA, Adjepong-Yamoah KK, et al. Metformin versus Insulin in the  
25 Management of Pre-Gestational Diabetes Mellitus in Pregnancy and Gestational  
26 Diabetes Mellitus at the Korle Bu Teaching Hospital: A Randomized Clinical Trial. *PLoS*  
27 *One.* 2015;10(5):e0125712.
- 28 81. Ibrahim MI, Hamdy A, Shafik A, et al. The role of adding metformin in insulin-  
29 resistant diabetic pregnant women: a randomized controlled trial. *Arch Gynecol Obstet.*  
30 2014;289(5):959-65.
- 31 82. Cosentino F, Grant PJ, Aboyans V, et al. 2019 ESC Guidelines on diabetes,  
32 pre-diabetes, and cardiovascular diseases developed in collaboration with the EASD.  
33 *Eur Heart J.* 2020;41(2):255-323.
- 34 83. Bailey CJ, Iqbal N, T'Joen C, et al. Dapagliflozin monotherapy in drug-naive  
35 patients with diabetes: a randomized-controlled trial of low-dose range. *Diabetes Obes*  
36 *Metab.* 2012;14(10):951-9.
- 37 84. Chou HS, Truitt KE, Moberly JB, et al. A 26-week, placebo- and pioglitazone-  
38 controlled monotherapy study of rivoglitazone in subjects with type 2 diabetes mellitus.  
39 *Diabetes Obes Metab.* 2012;14(11):1000-9.
- 40 85. De Caterina R, Andersson U, Alexander JH, et al. History of bleeding and  
41 outcomes with apixaban versus warfarin in patients with atrial fibrillation in the  
42 Apixaban for Reduction in Stroke and Other Thromboembolic Events in Atrial  
43 Fibrillation trial. *Am Heart J.* 2016;175:175-83.
- 44 86. Kadiri A, Al-Nakhi A, El-Ghazali S, et al. Treatment of type 1 diabetes with  
45 insulin lispro during Ramadan. *Diabetes Metab.* 2001;27(4 Pt 1):482-6.
- 46 87. Schumm-Draeger PM, Burgess L, Koranyi L, et al. Twice-daily dapagliflozin co-  
47 administered with metformin in type 2 diabetes: a 16-week randomized, placebo-  
48 controlled clinical trial. *Diabetes Obes Metab.* 2015;17(1):42-51.
- 49 88. Van Olmen J, Van Pelt M, Malombo B, et al. Process evaluation of a mobile  
50 health intervention for people with diabetes in low income countries - the  
51 implementation of the TEXT4DSM study. *J Telemed Telecare.* 2017;23(1):96-105.
- 52 89. Wang J, Shi GP. Mast cell stabilization: novel medication for obesity and  
53 diabetes. *Diabetes Metab Res Rev.* 2011;27(8):919-24.
- 54 90. Chen Z, Sun H, Wang J, et al. Role of Ketotifen on metabolic profiles,  
55 inflammation and oxidative stress in diabetic rats. *Endocr J.* 2017:EJ16-0458.
- 56  
57  
58  
59  
60

- 1
  - 2
  - 3
  - 4
  - 5
  - 6
  - 7
  - 8
  - 9
  - 10
  - 11
  - 12
  - 13
  - 14
  - 15
  - 16
  - 17
  - 18
  - 19
  - 20
  - 21
  - 22
  - 23
  - 24
  - 25
  - 26
  - 27
  - 28
  - 29
  - 30
  - 31
  - 32
  - 33
  - 34
  - 35
  - 36
  - 37
  - 38
  - 39
  - 40
  - 41
  - 42
  - 43
  - 44
  - 45
  - 46
  - 47
  - 48
  - 49
  - 50
  - 51
  - 52
  - 53
  - 54
  - 55
  - 56
  - 57
  - 58
  - 59
  - 60
91. Wang C, Mamza J, Idris I. Biphasic vs basal bolus insulin regimen in type 2 diabetes: a systematic review and meta-analysis of randomized controlled trials. *Diabet Med.* 2015;32(5):585-94.
92. Meece J. Basal insulin intensification in patients with type 2 diabetes: a review. *Diabetes Ther.* 2018;9(3):877-90.
93. Heinemann L, Braune K, Carter A, et al. Insulin storage: a critical reappraisal. *J Diabetes Sci Technol.* 2020:1932296819900258.
94. Bahendeka S, Kaushik R, Swai AB, et al. EADSG guidelines: insulin storage and optimisation of injection technique in diabetes management. *Diabetes Ther.* 2019;10(2):341-66.
95. Asamoah EA, Obirikorang C, Acheampong E, et al. Heritability and Genetics of Type 2 Diabetes Mellitus in Sub-Saharan Africa: A Systematic Review and Meta-Analysis. *J Diab Res.* 2020.
96. Onengut-Gumuscu S, Chen WM, Robertson CC, et al. Type 1 Diabetes Risk in African-Ancestry Participants and Utility of an Ancestry-Specific Genetic Risk Score. *Diabetes Care.* 2019;42(3):406-15.
97. Cheng C-Y, Reich D, Haiman CA, et al. African ancestry and its correlation to type 2 diabetes in African Americans: a genetic admixture analysis in three US population cohorts. *PLoS One.* 2012;7(3):e32840.
98. Ng MC, Shriner D, Chen BH, et al. Meta-analysis of genome-wide association studies in African Americans provides insights into the genetic architecture of type 2 diabetes. *PLoS Genet.* 2014;10(8):e1004517.
99. Farrar D, Simmonds M, Bryant M, et al. Treatments for gestational diabetes: a systematic review and meta-analysis. *BMJ Open.* 2017;7(6).
100. Tarry-Adkins JL, Aiken CE, Ozanne SE. Comparative impact of pharmacological treatments for gestational diabetes on neonatal anthropometry independent of maternal glycaemic control: A systematic review and meta-analysis. *PLoS Med.* 2020;17(5):e1003126.
101. Abdulrhman MM, El-Hefnawy MH, Aly RH, et al. Metabolic effects of honey in type 1 diabetes mellitus: a randomized crossover pilot study. *J Med Food.* 2013;16(1):66-72.
102. Mohamad RH, Zekry ZK, Al-Mehdar HA, et al. Camel milk as an adjuvant therapy for the treatment of type 1 diabetes: verification of a traditional ethnomedical practice. *J Med Food.* 2009;12(2):461-5.
103. van der Hoogt M, van Dyk JC, Dolman RC, et al. Protein and fat meal content increase insulin requirement in children with type 1 diabetes - Role of duration of diabetes. *J Clin Transl Endocrinol.* 2017;10:15-21.
104. Shori AB. Camel milk as a potential therapy for controlling diabetes and its complications: A review of in vivo studies. *J Food Drug Anal.* 2015;23(4):609-18.
105. Matter RM, Elbarbary NS, Ismail EAR, et al. Zinc supplementation improves glucose homeostasis in patients with  $\beta^0$ -thalassemia major complicated with diabetes mellitus: a randomized controlled trial. *Nutrition.* 2020;73.
106. Anderson RA, Roussel AM, Zouari N, et al. Potential antioxidant effects of zinc and chromium supplementation in people with type 2 diabetes mellitus. *J Am Coll Nutr.* 2001;20(3):212-8.
107. El Gayar MH, Aboromia MMM, Ibrahim NA, et al. Effects of ginger powder supplementation on glycemic status and lipid profile in newly diagnosed obese patients with type 2 diabetes mellitus. *Obes Med.* 2019;14.
108. Moustafa HAM, El Wakeel LM, Halawa MR, et al. Effect of Nigella Sativa oil versus metformin on glycemic control and biochemical parameters of newly diagnosed type 2 diabetes mellitus patients. *Endocrine.* 2019;65(2):286-94.
109. El-Sheikh HM, El-Haggag SM, Elbedewy TA. Comparative study to evaluate the effect of L-carnitine plus glimepiride versus glimepiride alone on insulin resistance in type 2 diabetic patients. *Diabetes Metab Syndr.* 2019;13(1):167-73.



- 1  
2  
3 110. Elbarbary NS, Ismail EAR, El-Naggar AR, et al. The effect of 12 weeks  
4 carnosine supplementation on renal functional integrity and oxidative stress in pediatric  
5 patients with diabetic nephropathy: a randomized placebo-controlled trial. *Pediatr*  
6 *diabetes*. 2018;19(3):470-7.  
7 111. Ali S, Ghanem Y, Sharaki O, et al. The impact of different regimens of vitamin  
8 d3 on glucose homeostasis in type 2 diabetic patients. *Asian J Pharm Clin Res*.  
9 2019;12(12):21-6.  
10 112. Elbarbary NS, Ismail EAR, Zaki MA, et al. Vitamin B complex supplementation  
11 as a homocysteine-lowering therapy for early stage diabetic nephropathy in pediatric  
12 patients with type 1 diabetes: A randomized controlled trial. *Clin Nutr*. 2020;39(1):49-  
13 56.  
14 113. Anyanwu AC, Fasanmade OA, Odeniyi IA, et al. Effect of Vitamin D  
15 supplementation on glycemic control in Type 2 diabetes subjects in Lagos, Nigeria.  
16 *Indian J Endocrinol Metab*. 2016;20(2):189-94.  
17 114. Jayawardena R, Ranasinghe P, Galappatthy P, et al. Effects of zinc  
18 supplementation on diabetes mellitus: a systematic review and meta-analysis. *Diabetol*  
19 *Metab Syndr*. 2012;4(1):13.  
20 115. Wang X, Wu W, Zheng W, et al. Zinc supplementation improves glycemic  
21 control for diabetes prevention and management: a systematic review and meta-  
22 analysis of randomized controlled trials. *Am J Clin Nutr*. 2019;110(1):76-90.  
23 116. Daily JW, Yang M, Kim DS, et al. Efficacy of ginger for treating Type 2 diabetes:  
24 A systematic review and meta-analysis of randomized clinical trials. *J Ethn Foods*.  
25 2015;2(1):36-43.  
26 117. Zhu J, Chen H, Song Z, et al. Effects of ginger (*Zingiber officinale* Roscoe) on  
27 type 2 diabetes mellitus and components of the metabolic syndrome: A systematic  
28 review and meta-analysis of randomized controlled trials. *Evid Based Complement*  
29 *Alternat Med*. 2018;2018.  
30 118. Daryabeygi-Khotbehsara R, Golzarand M, Ghaffari MP, et al. *Nigella sativa*  
31 improves glucose homeostasis and serum lipids in type 2 diabetes: A systematic  
32 review and meta-analysis. *Complement Ther Med*. 2017;35:6-13.  
33 119. Heshmati J, Namazi N. Effects of black seed (*Nigella sativa*) on metabolic  
34 parameters in diabetes mellitus: A systematic review. *Complement Ther Med*.  
35 2015;23(2):275-82.  
36 120. Vidal-Casariago A, Burgos-Peláez R, Martínez-Faedo C, et al. Metabolic effects  
37 of L-carnitine on type 2 diabetes mellitus: systematic review and meta-analysis. *Exp*  
38 *Clin Endocrinol Diabetes*. 2013;121(04):234-8.  
39 121. Xu Y, Jiang W, Chen G, et al. L-carnitine treatment of insulin resistance: A  
40 systematic review and meta-analysis. *Adv Clin Exp Med*. 2017;26(2):333-8.  
41 122. Das UN. Vitamin C for Type 2 Diabetes Mellitus and Hypertension. *Arch Med*  
42 *Res*. 2019;50(2):11-4.  
43 123. Afkhami-Ardekani M, Shojaoddiny-Ardekani A. Effect of vitamin C on blood  
44 glucose, serum lipids & serum insulin in type 2 diabetes patients. *Indian J Med Res*.  
45 2007;126(5):471.  
46 124. Maritim A, Sanders a, Watkins lii J. Diabetes, oxidative stress, and antioxidants:  
47 a review. *J Biochem Mol Toxicol*. 2003;17(1):24-38.  
48 125. Zhou C, Na L, Shan R, et al. Dietary vitamin C intake reduces the risk of type 2  
49 diabetes in Chinese adults: HOMA-IR and T-AOC as potential mediators. *Plos One*.  
50 2016;11(9):e0163571.  
51 126. Hosseinzadeh H, Nassiri-Asl M. Review of the protective effects of rutin on the  
52 metabolic function as an important dietary flavonoid. *J Endocrinol Invest*.  
53 2014;37(9):783-8.  
54 127. Pittas AG, Dawson-Hughes B, Sheehan P, et al. Vitamin D Supplementation  
55 and Prevention of Type 2 Diabetes. *NEJM*. 2019;381(6):520-30.  
56  
57  
58  
59  
60

- 1  
2  
3 128. Seida JC, Mitri J, Colmers IN, et al. Effect of vitamin D3 supplementation on  
4 improving glucose homeostasis and preventing diabetes: a systematic review and  
5 meta-analysis. *J Clin Endocrinol Metab*. 2014;99(10):3551-60.
- 6 129. Rashad H, Metwally FM, Ezzat SM, et al. Randomized double-blinded pilot  
7 clinical study of the antidiabetic activity of *Balanites aegyptiaca* and UPLC-ESI-MS/MS  
8 identification of its metabolites. *Pharm Biol*. 2017;55(1):1954-61.
- 9 130. Helal EG, El-Wahab A, Samia M, et al. Antidiabetic and antihyperlipidemic  
10 effect of *Balanites aegyptiaca* seeds (aqueous extract) on diabetic rats. *Egypt J Hosp*  
11 *Med*. 2013;52(1):725-39.
- 12 131. El-Makaky Y, Shalaby HK. The effects of non-surgical periodontal therapy on  
13 glycemic control in diabetic patients: a randomized controlled trial. *Oral Dis*.  
14 2020;26:822-9.
- 15 132. El-Sharkawy HM, Anees MM, Van Dyke TE. Propolis improves periodontal  
16 status and glycemic control in patients with type 2 diabetes mellitus and chronic  
17 periodontitis: a randomized clinical trial. *J Periodontol*. 2016;87(12):1418-26.
- 18 133. Tsobgny-Tsague NF, Lontchi-Yimagou E, Nana ARN, et al. Effects of  
19 nonsurgical periodontal treatment on glycosylated haemoglobin on type 2 diabetes patients  
20 (PARODIA 1 study): a randomized controlled trial in a sub-Saharan Africa population.  
21 *BMC Oral Health*. 2018;18(1):28.
- 22 134. Sahile AT, Mgutshini T, Ayehu SM. Oral Health Screening Status of Diabetes  
23 Patients in Selected Hospitals of Addis Ababa, Ethiopia, 2018. *Patient Relat Outcome*  
24 *Meas*. 2020;11:173.
- 25 135. World Health Organization. Regional Office for Africa. (2016). Promoting Oral  
26 Health in Africa: Prevention and control of oral diseases and noma as part of essential  
27 noncommunicable disease interventions. World Health Organization. Regional Office  
28 for Africa. <https://apps.who.int/iris/handle/10665/205886>. Accessed 30 Jan 2021
- 29 136. Nteleki B, Abrahamse H, Houreld NN. Conventional podiatric intervention and  
30 phototherapy in the treatment of diabetic ulcers. *Semin Vasc Surg*. 2015;28(3-4):172-  
31 83.
- 32 137. Yakoot M, Abdelatif M, Helmy S. Efficacy of a new local limb salvage treatment  
33 for limb-threatening diabetic foot wounds-a randomized controlled study. *Diabetes*  
34 *Metab Syndr Obes*. 2019;12:1659.
- 35 138. Wang HT, Yuan JQ, Zhang B, et al. Phototherapy for treating foot ulcers in  
36 people with diabetes. *Cochrane Database Syst Rev*. 2017(6).
- 37 139. Henshaw FR, Bolton T, Nube V, et al. Topical application of the bee hive  
38 protectant propolis is well tolerated and improves human diabetic foot ulcer healing in a  
39 prospective feasibility study. *J Diabetes Complications*. 2014;28(6):850-7.
- 40 140. Afkhamizadeh M, Aboutorabi R, Ravari H, et al. Topical propolis improves  
41 wound healing in patients with diabetic foot ulcer: a randomized controlled trial. *Nat*  
42 *Prod Res*. 2018;32(17):2096-9.
- 43 141. Hegazi R, El-Gamal M, Abdel-Hady N, et al. Epidemiology of and risk factors for  
44 type 2 diabetes in Egypt. *Ann Glob Health*. 2015;81(6):814-20.
- 45 142. Sherwani SI, Khan HA, Ekhzaimy A, et al. Significance of HbA1c test in  
46 diagnosis and prognosis of diabetic patients. *Biomarker insights*. 2016;11:BMI.  
47 S38440.
- 48 143. OCEBM Levels of Evidence Working Group\*. "The Oxford 2011 Levels of  
49 Evidence". Oxford Centre for Evidence-Based Medicine.  
50 <http://www.cebm.net/index.aspx?o=5653>. Accessed 31 Jan 2021.
- 51 144. Matshego L. How Many Languages of Africa Are There?  
52 <https://africa.com/many-african-languages/>. Accessed 3 Aug 2020.
- 53  
54  
55  
56  
57  
58  
59  
60

Studies on patients with pre-DM

| Study name                                                  | Setting                            | Population                                                                                                                                                                                                                                                                                                                                                                                    | Intervention vs. Control                                                                                                                                                                                                                                                                                                                                                                                       | Outcomes                                                                        | Results                                                                                                                                                                                                                                                                                                      |
|-------------------------------------------------------------|------------------------------------|-----------------------------------------------------------------------------------------------------------------------------------------------------------------------------------------------------------------------------------------------------------------------------------------------------------------------------------------------------------------------------------------------|----------------------------------------------------------------------------------------------------------------------------------------------------------------------------------------------------------------------------------------------------------------------------------------------------------------------------------------------------------------------------------------------------------------|---------------------------------------------------------------------------------|--------------------------------------------------------------------------------------------------------------------------------------------------------------------------------------------------------------------------------------------------------------------------------------------------------------|
| registration number Design                                  | Place, setting and time            | Inclusion / Exclusion criteria Characteristics                                                                                                                                                                                                                                                                                                                                                | Description with duration                                                                                                                                                                                                                                                                                                                                                                                      | Primary and secondary                                                           | Longest follow-up period with intervention effects (IG vs. CG) with SD, 95%-CI or p value                                                                                                                                                                                                                    |
| <b>Strategies to enhance physical activity</b>              |                                    |                                                                                                                                                                                                                                                                                                                                                                                               |                                                                                                                                                                                                                                                                                                                                                                                                                |                                                                                 |                                                                                                                                                                                                                                                                                                              |
| <b>RezkAllah 2019</b><br>ACTRN126170<br>00631303<br>RCT     | Egypt, urban<br>07/2017-01/2018    | Pre-DM, 25-45 yrs, BMI of 25–30 kg/m <sup>2</sup> , HbA1C 5.7–6.4%, fasting glucose 100–125 mg/dL, sedentary lifestyle<br><br>No history of diabetes, cancer, prediabetic neuropathy, stroke, pulmonary embolism, or severe musculoskeletal problems restricting physical activity                                                                                                            | n=60<br>45 % females<br>age (yrs): 32.9±5.5<br>BMI (kg/m <sup>2</sup> ): 28.3±1.4<br><br><u>IG2 (n=20):</u><br>High-volume high intensity interval training, 40 min/session<br><br><u>IG1 (n=20):</u><br>Low-volume high intensity interval training, 25 min/session<br>Both with 90 % HR maximum, 3 times/week<br><u>CG (n=20):</u><br>No exercise intervention<br><u>Duration:</u> 12 weeks                  | <u>Primary:</u> HbA1c<br><u>Other:</u> fasting glucose                          | After 3 months<br><u>HbA1c (%)</u> :<br>Benefit for IG2 and IG1: Benefit for IG: 4.87±0.34 (-26 %) vs. 5.13±0.57 (-14.5 %) vs. 6.25±0.48 (+3.38 %) (p=0.0001)<br><u>fasting glucose (mg/dL)</u> :<br>Benefit for IG2 and IG1: 90.8±4.13 (-17.8 %) vs. 93.8±4.16 (-13.2 %) vs. 103.8±7.21 (+2.9 %) (p=0.0001) |
| <b>Strategies on nutrition</b>                              |                                    |                                                                                                                                                                                                                                                                                                                                                                                               |                                                                                                                                                                                                                                                                                                                                                                                                                |                                                                                 |                                                                                                                                                                                                                                                                                                              |
| <b>Krawinkel 2018</b><br>DRKS<br>00005131<br>Cross-over-RCT | Tanzania, urban<br>10/2013-03/2014 | Individuals with pre-DM age (yrs): 30 -65, FPG 5.6-6.9 mmol/l (100–125 mg/dL) on 2 days or on one day + HbA1c 5.7-7.5 %, BMI 27–35 kg/m <sup>2</sup> , BP 90/60-160/110 mmHg, waist circumference > 80/90 cm for women / men<br><br>No chronic disease, taking regular intake of medication, identified glucose-6-phosphatase-dehydrogenase deficiency, heavy alcohol consumption, pregnancy, | n=52<br>55% female<br>age (yrs): 47.5±8.7<br>HbA1c (%):5.85±0.43<br>FPG: (mmol/l): 5.34±0.49<br>BMI (kg/m <sup>2</sup> ):29.6±2.2<br><br><u>IG/CG (n=30):</u><br>started with bitter gourd supplementation (2,5 g) over 8 wks, followed by placebo over 8 wks<br><br><u>CG/IG (n=31):</u><br>first placebo over 8 wks, followed by bitter gourd over 8 wks<br>washout period: 4 wks<br><u>Duration</u> 8 weeks | <u>Primary:</u><br>FPG<br><u>Secondary:</u><br>HbA1c, Insulin, SBP, DBP, lipids | after 8 wks<br><u>FPG (mmol/l)</u> :<br>Benefit for IG/CG: MD 0.31 (0.08-0.54)<br><u>HbA1c: (%)</u> :<br>No differences (MD 0.05)                                                                                                                                                                            |

| Study name                                                                                                                                                                                                                                                                                                                                                                                                                           | Setting                 | Population                                        | Intervention vs. Control  | Outcomes              | Results                                                                                   |
|--------------------------------------------------------------------------------------------------------------------------------------------------------------------------------------------------------------------------------------------------------------------------------------------------------------------------------------------------------------------------------------------------------------------------------------|-------------------------|---------------------------------------------------|---------------------------|-----------------------|-------------------------------------------------------------------------------------------|
| registration number<br>Design                                                                                                                                                                                                                                                                                                                                                                                                        | Place, setting and time | Inclusion / Exclusion criteria<br>Characteristics | Description with duration | Primary and secondary | Longest follow-up period with intervention effects (IG vs. CG) with SD, 95%-CI or p value |
| lactation                                                                                                                                                                                                                                                                                                                                                                                                                            |                         |                                                   |                           |                       |                                                                                           |
| BMI: Body mass index; CG: Control group; CG/IG: Crossover from CG to IG; CI: Confidence interval; DBP: Diastolic blood pressure; DM: diabetes mellitus; FPG: fasting plasma glucose; HbA1c: haemoglobin A1c; IG/CG: cross over from IG to CG; IG: intervention group; n: number of participants; MD: mean difference; RCT: randomized controlled trial; SBP: Systolic blood pressure; SD: Standard-deviation; wks: weeks; yrs: years |                         |                                                   |                           |                       |                                                                                           |

**Table 2: Characteristics and results of studies on patients with pre-DM**

Studies on patients with DM1

| Study name                                          | Setting                                  | Population                                                                                                                                                                                                                                                   | Intervention vs. Control                                                                                                                                                                                                                                                                                             | Outcomes                                                                                                                                     | Results                                                                                                                                                                                                                                                                  |
|-----------------------------------------------------|------------------------------------------|--------------------------------------------------------------------------------------------------------------------------------------------------------------------------------------------------------------------------------------------------------------|----------------------------------------------------------------------------------------------------------------------------------------------------------------------------------------------------------------------------------------------------------------------------------------------------------------------|----------------------------------------------------------------------------------------------------------------------------------------------|--------------------------------------------------------------------------------------------------------------------------------------------------------------------------------------------------------------------------------------------------------------------------|
| registration number Design                          | Place, setting and time                  | Inclusion / Exclusion criteria Characteristics                                                                                                                                                                                                               | Description with duration                                                                                                                                                                                                                                                                                            | Primary and secondary                                                                                                                        | Longest follow-up period with intervention effects (IG vs. CG) with SD, 95%-CI or p value                                                                                                                                                                                |
| <b>Educational strategies</b>                       |                                          |                                                                                                                                                                                                                                                              |                                                                                                                                                                                                                                                                                                                      |                                                                                                                                              |                                                                                                                                                                                                                                                                          |
| <b>Malipa 2013</b><br>RCT                           | Zambia                                   | DM1, 16-19 yrs<br>n=40<br>55% females<br>16-17 yrs: 35 %<br>18-19 yrs: 65 %<br>Compliance: worse in IG 26.4 vs. 14.6 (p=0.001)<br>Impact of diabetes: 20.5<br>Worries about diabetes: 20.5<br>Satisfaction with life: 20.5                                   | <u>IG (n=20):</u> 1 meeting /wk over 8 wks<br><u>CG (n=20):</u> waiting list<br><u>Duration:</u> 8 wks                                                                                                                                                                                                               | Compliance to treatment (Rating scale for compliance)<br>Quality of life (impact and worries about diabetes, satisfaction with life)         | After 2 months:<br>Compliance: better in IG (11.0 vs. 30; p<0.001)<br>Impact of diabetes: better in IG (16.8 vs. 24.2; p=0.045)<br>Worries about diabetes: better in IG (14.32 vs. 26.68; p=0.001)<br>Satisfaction with life: better in IG (28.5 vs. 12.5; p<0.001)      |
| <b>Strategies to enhance physical activity</b>      |                                          |                                                                                                                                                                                                                                                              |                                                                                                                                                                                                                                                                                                                      |                                                                                                                                              |                                                                                                                                                                                                                                                                          |
| <b>Salem 2010</b><br>RCT                            | Egypt, urban<br>02/2009-11/2009          | DM1 for ≥3 years, 12-18 yrs, HbA1c ≥7.5 % for ≥6 months<br>no significant diabetic complications limiting exercise like, uncontrolled hypertension, diabetic keto-acidosis, severe hypoglycemia within the past 3 months, patients on lipid lowering therapy | n=196<br>61.7 % female<br>age (yrs): 14.78 ± 2.31<br>HbA1c (%): 8.7±1.7<br>duration of diabetes (yrs): 4.6 ± 1.9<br><u>IG2 (n=73):</u> attended exercise sessions three times/week vs. <u>IG 1 (n=75):</u> attended exercise sessions once times/week vs. <u>CG (n=48):</u> no exercise<br><u>Duration: 6 months</u> | glycemic control, plasma lipids values, blood pressure, severity and frequency of hypoglycemia, anthropometric measurements and insulin dose | Change over 6 months: <u>HbA1c (%)</u> : Benefit for IG2 and IG1: 7.8 ± 1.0 vs. 8.1 ± 1.1 vs. 8.9 ± 1.3% (p=0.2)                                                                                                                                                         |
| <b>Strategies on nutrition</b>                      |                                          |                                                                                                                                                                                                                                                              |                                                                                                                                                                                                                                                                                                                      |                                                                                                                                              |                                                                                                                                                                                                                                                                          |
| <b>Abdulrhman 2013</b><br>NCT01554566<br>Cross-over | Egypt, urban, tertiary care<br>01/2010 - | DM1, age > 2 yrs, HbA1c< 10 %<br>no renal or hepatic impairment, coexisting                                                                                                                                                                                  | n=20<br>50 % females<br>age (yrs): 11.3 ± 4.3<br>duration of diabetes (yrs): 4.7±4.5                                                                                                                                                                                                                                 | <u>IG/ CG (n=10):</u> Honey consumption (0.5 ml/kg body weight per day) vs.                                                                  | <u>Primary:</u> serum lipids, c-peptide<br><u>Secondary:</u> anthropometric measures (e.g. BMI), fasting and 2h-<br>After 12 weeks: (IG/CG vs. CG/IG): <u>HbA1c (%)</u> :<br>Benefit with CG/IG: 6.7±0.9 vs. 5.9±0.8 (p<0.01)<br>no differences in change in period 1: - |

| Study name<br>registration<br>number<br>Design         | Setting<br>Place,<br>setting and<br>time   | Population<br>Inclusion / Exclusion criteria<br>Characteristics                                                                                                                                                                                                                                                                                                                                           | Intervention vs. Control<br>Description with duration                                                                                                   | Outcomes<br>Primary and secondary                                                                                                                                                                                                                                                                                                  | Results<br>Longest follow-up period with<br>intervention effects (IG vs. CG) with<br>SD, 95%-CI or p value                                                                                                                                                                                                                                                                                                                                                                    |
|--------------------------------------------------------|--------------------------------------------|-----------------------------------------------------------------------------------------------------------------------------------------------------------------------------------------------------------------------------------------------------------------------------------------------------------------------------------------------------------------------------------------------------------|---------------------------------------------------------------------------------------------------------------------------------------------------------|------------------------------------------------------------------------------------------------------------------------------------------------------------------------------------------------------------------------------------------------------------------------------------------------------------------------------------|-------------------------------------------------------------------------------------------------------------------------------------------------------------------------------------------------------------------------------------------------------------------------------------------------------------------------------------------------------------------------------------------------------------------------------------------------------------------------------|
| RCT                                                    | 10 / 2011                                  | diseases or therapies that<br>may affect body weight or<br>serum lipids                                                                                                                                                                                                                                                                                                                                   | HbA1c (%): 7.21± 0.76<br>fasting glucose<br>(mg/dl): 154.5±22.5                                                                                         | <u>CG/IG (n=10)</u> : changed<br>after 12 wks and received<br>than honey<br><u>Duration</u> : 12 wks.                                                                                                                                                                                                                              | postprandial glucose,<br>HbA1c, serum lipid profile<br>5.83 ± 13.66 vs. 2.94±8.82 (p=0.105)<br><u>Fasting glucose (mg/dl)</u> :<br>• benefit with CG/IG: 142.7 ±26.6 vs.<br>116.7±19.4 (p<0.01)<br>benefit with IG/CG in period 1:-21.51 ±<br>10.84 vs. -0.08±5.14 (p=0.001)                                                                                                                                                                                                  |
| <b>Mohamad<br/>2009</b><br><br>RCT                     | Egypt,<br>urban                            | DM1, age 17 to 20 yrs<br><br>no acute metabolic<br>complications like diabetic<br>ketoacidosis, hypoglycaemia,<br>cardiovascular events, renal<br>or acute infections                                                                                                                                                                                                                                     | n=64<br>30 % female<br>age (yrs): 19.9±6.8<br>HbA1c (%): 9.52±2.08<br>fasting glucose<br>(mg/dl): 228.7±13.5<br>BMI (kg/m <sup>2</sup> ):<br>18.82±3.01 | <u>IG (n=27)</u> :<br>camel milk (500 ml)<br>+usual care<br>vs.<br><u>CG (n=27)</u> :<br>usual care for diabetes<br>(i.e. diet, exercise, insulin<br>mixtard)<br><u>Duration</u> : 16 weeks                                                                                                                                        | <u>Not specified</u> :<br>HbA1c, human C-peptide,<br>lipid profile, serum<br>insulin, anti-insulin<br>antibodies, creatinine<br>clearance, albumin<br>extraction in 24 h urine,<br>BMI, Diabetes QoL score,<br>fasting glucose<br>After 16 wks<br><u>HbA1c (%)</u> :<br>Benefit for IG: 7.16±1.84 vs. 9.59±2.05<br>fasting glucose (mg/dl):<br>benefit for IG: 227.2±17.7 vs.<br>98.9±16.2                                                                                    |
| <b>van der Hoogt<br/>2017</b><br><br>cross-over<br>RCT | South Africa                               | DM1, age 4-17 yrs on insulin<br>pump therapy, HbA1c>9,6%<br>for ≥3months, BMI/age<br>z.score -1 to < 3, total daily<br>insulin use of >0,5 u/kg<br>no remission of diabetes,<br>smoking, coeliac disease,<br>cystic fibrosis, diseases or<br>medication that are<br>associated with delayed<br>gastric emptying or altered<br>digestation, glucocorticoids,<br>oral diabetic drugs, no acute<br>illnesses | n=32<br>41% female<br>age (yrs): 10.4±4.0<br>HbA1c (%): 8.2±0.8<br>duration of Diabetes<br>(yrs): 3.5 (1.5-8.0)                                         | <u>IG1 (n=22)</u> :<br>1 home-based_low fat and<br>protein meal<br>vs.<br><u>IG2 (n=22)</u> :<br>1 high fat and protein<br>meal with identical<br>carbohydrate content<br>two meals were<br>consumed at dinner time<br>(18:00) under parental<br>supervision at least 1 day<br>apart within one month<br><u>Duration</u> : 3months | <u>primary</u> : peak sensor<br>glucose value post-meal,<br>time to peak sensor<br>glucose, time of first and<br>largest correction bolus,<br>total correction insulin,<br>total meal insulin,<br>additional insulin<br>required ,area under the<br>sensor glucose response<br>curve (AUC) (≥ 8 mmol/L),<br>duration of elevated post-<br>prandial glucose<br>Change over 12 weeks<br><u>Occurance of hypoglycaemic events</u> :<br>7 (32 %) vs. 1 patients after IG1 vs. IG2 |
| <b>Medical device</b>                                  |                                            |                                                                                                                                                                                                                                                                                                                                                                                                           |                                                                                                                                                         |                                                                                                                                                                                                                                                                                                                                    |                                                                                                                                                                                                                                                                                                                                                                                                                                                                               |
| Elbarbary<br>2016<br><br>RCT                           | Egypt,<br>urban<br><br>06/2014-<br>07/2014 | DM1, adolescents and adults<br>who wished to fast the<br>month of Ramadan with<br>insulin pump for ≥6 months<br>and attending the whole                                                                                                                                                                                                                                                                   | n=73<br>68.3% female<br>age (yrs): 15.6±2.7<br>HbA1c (%): 7.65±0.9<br>BMI (kg/m <sup>2</sup> ):                                                         | Insulin pump therapy<br>during Ramadan fasting<br><br><u>IG (n=25)</u> :<br>sensor with low glucose                                                                                                                                                                                                                                | <u>Primary</u> : hypoglycaemia<br><u>Other</u> : glucose value,<br>number of 'full fasted<br>days', emergency hospital<br>visit for diabetes-related<br>After 1 months:<br><u>Glucose value (mg/dl)</u> :<br>152.5±17.3 vs. 141±33.8 (p=0.9)<br><u>Complications</u> :<br>Number of hypoglycaemic excursions:                                                                                                                                                                 |

| Study name<br>registration<br>number<br>Design      | Setting<br>Place,<br>setting and<br>time   | Population<br>Inclusion / Exclusion criteria                                                                                                    | Characteristics                                                                                                                                             | Intervention vs. Control<br>Description with duration                                                                                   | Outcomes<br>Primary and secondary                                                                                                                                | Results<br>Longest follow-up period with<br>intervention effects (IG vs. CG) with<br>SD, 95%-CI or p value                                                                                                                                                                       |
|-----------------------------------------------------|--------------------------------------------|-------------------------------------------------------------------------------------------------------------------------------------------------|-------------------------------------------------------------------------------------------------------------------------------------------------------------|-----------------------------------------------------------------------------------------------------------------------------------------|------------------------------------------------------------------------------------------------------------------------------------------------------------------|----------------------------------------------------------------------------------------------------------------------------------------------------------------------------------------------------------------------------------------------------------------------------------|
|                                                     |                                            | education session 2 months<br>before fasting and committed<br>to follow-up the given<br>instructions                                            | 24.56±3.5<br>duration of diabetes<br>(yrs): 5.8±2.9<br>on pump therapy<br>(yrs): 1.73±0.99                                                                  | suspension activation<br>vs.<br><u>CG (n=35):</u><br>sensor without low<br>glucose suspension<br>activation<br><u>Duration:</u> 1 month | problem                                                                                                                                                          | 3.68±1.62 vs. 6.7±2.1 (p=0.001)<br>Number of hyperglycaemic excursions:<br>17.0±4.0 vs. 23.0±7.6 (p=0.001)<br>No severe hypoglycaemic events, no<br>episodes of diabetic ketoacidosis, no<br>hyperglycaemic events associated with<br>ketosis no deaths or device-related<br>SAE |
| <b>Pharmacological Strategies</b>                   |                                            |                                                                                                                                                 |                                                                                                                                                             |                                                                                                                                         |                                                                                                                                                                  |                                                                                                                                                                                                                                                                                  |
| <b>Elbarbary<br/>2018</b><br>NCT0292825<br><br>RCT  | Egypt,<br>urban                            | DM1, age: 9 - 18 yrs, ≥ 5 yrs<br>disease duration, active<br>diabetic nephropathy in the<br>form of microalbuminuria,<br>HbA1c ≤ 8.5 %          | n=90<br>52.3 % female<br>age (yrs): 12.85±3.1<br>HbA1c (%):7.85±1.95                                                                                        | <u>IG (n=45):</u><br>1 g/d carnosine<br>vs.<br><u>CG (n=45):</u><br>control/placebo group                                               | <u>Primary:</u> change in<br>tubular damage marker<br><u>Secondary:</u> urinary<br>albumin excretion (UAE),<br>oxidative stress markers<br><u>Safety:</u> any AE | After 12 wks:<br><u>HbA1c (%):</u><br>• Benefit for IG: 7.4 ±1.3 vs. 8.3±2.4<br>• change -9.88±7.12 vs. 3.89±2.28<br>(p=0.005)<br>No adverse reactions were reported                                                                                                             |
|                                                     |                                            | no infection, renal<br>impairment due to other<br>causes other than diabetes,<br>other diabetic complications,<br>hypersensitivity to carnosine |                                                                                                                                                             | Patients in both groups<br>received oral ACE-Is<br>captopril 25 mg<br><u>Duration:</u> 12 wks                                           |                                                                                                                                                                  |                                                                                                                                                                                                                                                                                  |
| <b>Elbarbary<br/>2020</b><br>NCT03594240<br><br>RCT | Egypt,<br>urban<br><br>03/2017-<br>03/2018 | DM1 on insulin therapy with<br>> 5 yrs of disease duration,<br>12-18 yrs, active<br>nephropathy, HbA1c< 8.5 %,                                  | n=80<br>55% female<br>age (yrs): 15.4 ± 1.6<br>HbA1c (%):7.95±0.5<br>fasting glucose<br>(mg/dl): 114.5±21.8<br>duration of diabetes<br>(years): 8.65 ± 2.65 | both groups received oral<br>angiotensin-converting-<br>enzyme inhibitors<br>(captopril)                                                | <u>Primary:</u> Cystatin C<br>diet, physical activity, and<br>metformin dosage                                                                                   | after 12 weeks<br><u>HbA1c (%):</u><br>Benefit for IG: 7.5±0.6 vs. 8.0±0.6<br><u>Fasting glucose (mg/dl):</u><br>107.7±14.1 vs. 116.4±17 (p=131)                                                                                                                                 |
|                                                     |                                            | no infections, renal<br>impairment due to other<br>causes than diabetes, other<br>diabetic complications ,                                      |                                                                                                                                                             | <u>IG (n=40)</u> oral vitamin B<br>complex (B1,B6,B12)<br>once daily<br>vs.                                                             |                                                                                                                                                                  |                                                                                                                                                                                                                                                                                  |

| Study name                                                                                                                                                                                                                                                                                                                                        | Setting                 | Population                                                                                                                                          | Intervention vs. Control                               | Outcomes              | Results                                                                                   |
|---------------------------------------------------------------------------------------------------------------------------------------------------------------------------------------------------------------------------------------------------------------------------------------------------------------------------------------------------|-------------------------|-----------------------------------------------------------------------------------------------------------------------------------------------------|--------------------------------------------------------|-----------------------|-------------------------------------------------------------------------------------------|
| registration number<br>Design                                                                                                                                                                                                                                                                                                                     | Place, setting and time | Inclusion / Exclusion criteria<br>Characteristics                                                                                                   | Description with duration                              | Primary and secondary | Longest follow-up period with intervention effects (IG vs. CG) with SD, 95%-CI or p value |
|                                                                                                                                                                                                                                                                                                                                                   |                         | elevated liver enzymes, hyper-or hypothyroidism, hypertension, neoplasm, taking any vitamins or food supplements within 1 months before study start | <u>CG (n=40): placebo</u><br><u>Duration: 12 weeks</u> |                       |                                                                                           |
| BMI: Body mass index; CG: Control group; CG/IG: Crossover from CG to IG; CI: Confidence interval; DM1: Type 1 diabetes; FPG: fasting plasma glucose; HbA1c: haemoglobin A1c; IG/CG: cross over from IG to CG; IG: intervention group; n: number of participants ;RCT: randomized controlled trial; SD: Standard-deviation; wks: weeks; yrs: years |                         |                                                                                                                                                     |                                                        |                       |                                                                                           |

**Table 3: Characteristics and results of studies on patients with DM1**



RCTs mainly including patients with DM2

| Study name                                  | Setting                                 | Population                                                                           | Intervention vs. Control                                                                                                                                                           | Outcomes                                                                                                                                                                                                                                                      | Results                                                                                                                                                                                                                                                                                                                                            |                                                                                                                                                                                                                                                                                                                                                                                                                                                                                                                                                  |
|---------------------------------------------|-----------------------------------------|--------------------------------------------------------------------------------------|------------------------------------------------------------------------------------------------------------------------------------------------------------------------------------|---------------------------------------------------------------------------------------------------------------------------------------------------------------------------------------------------------------------------------------------------------------|----------------------------------------------------------------------------------------------------------------------------------------------------------------------------------------------------------------------------------------------------------------------------------------------------------------------------------------------------|--------------------------------------------------------------------------------------------------------------------------------------------------------------------------------------------------------------------------------------------------------------------------------------------------------------------------------------------------------------------------------------------------------------------------------------------------------------------------------------------------------------------------------------------------|
| registration number Design                  | Place, setting and time                 | Inclusion / Exclusion criteria Characteristics                                       | Description with duration                                                                                                                                                          | Primary and secondary                                                                                                                                                                                                                                         | Longest follow-up period with intervention effects (IG vs. CG) with SD, 95%-CI or p value                                                                                                                                                                                                                                                          |                                                                                                                                                                                                                                                                                                                                                                                                                                                                                                                                                  |
| <b>Educational strategies</b>               |                                         |                                                                                      |                                                                                                                                                                                    |                                                                                                                                                                                                                                                               |                                                                                                                                                                                                                                                                                                                                                    |                                                                                                                                                                                                                                                                                                                                                                                                                                                                                                                                                  |
| <b>Abaza 2017</b><br>NCT02868320<br><br>RCT | Egypt, urban, tertiary care, 03-07/2015 | DM2, mobile phone, capable to read SMS or live with someone who could read           | n=73<br>56 % females<br>age (yrs): 51.5±9.2<br>majority had had diabetes for > 1 yr<br>hypertension: 41.1 %<br>on insulin: 19.2 %<br>DM complication: 80.8 %<br>HbA1c (%): 9.7±2.7 | Diabetes awareness program:<br>paper-based educations material plus<br><u>IG (n=34):</u> daily messages and weekly reminders addressing various diabetes care categories vs.<br><u>CG (n=39):</u> paper-based educations material<br><u>Duration:</u> 12 wks. | <u>Primary:</u> change in Hba1C<br><u>Secondary:</u> Random blood glucose levels, body weight, adherence of treatment and medication, diabetes self-efficacy and knowledge, rate of hospital/ER visits, frequency of measurements, regular exercise, patients confidence in healthcare provider and satisfaction, healthcare provider’s reputation | After 3 months:<br><u>HbA1c (%)</u> :<br>• No differences: 8.73 ±1.98 vs. 8.84±2.40, MD <sub>a</sub> : 0.290 (-0.402 to 0.983; p = 0.406)<br>• Benefit with IG: 47 vs. 15 % achieved the targeted 1% drop (p = 0.003)<br><u>Random blood glucose</u> (mg/dl):<br>• No difference: 181±65 vs. 201±87 (p=0.288)<br><u>Treatment adherence</u> (scores):<br>• Benefit with IG in SCI 3.42±0.48 vs. 2.52±0.49 (p<0.001) and Morisky: 3.76±0.55 vs. 2.74±1.07 (p<0.001)<br><u>Hospital /ER admission</u> (%):<br>No differences: 0 vs. 10.3 (p=0.118) |
| <b>Adibe 2013</b><br><br>RCT                | Nigeria, urban, tertiary care           | DM2, age≥ 18 yrs with oral hypoglycemic and / or insulin therapy<br><br>no pregnancy | n=220<br>58 % females<br>age (yrs): 52.6±7.9<br>duration of diabetes (yrs): 4.7±2.5,<br>60.5% with diabetes > 5 yrs<br>on insulin: 13.6 %<br>hypertension: 60.5 %                  | <u>IG (n=110):</u> structured self-care education and training program by pharmacists and nurses vs.<br><u>CG (n=110):</u> usual / conventional care<br><u>Duration:</u> 12 months                                                                            | <u>Primary:</u> incremental cost-utility ratio, net monetary benefit<br><u>Other:</u> quality of life                                                                                                                                                                                                                                              | After 12 months:<br><u>Quality of life</u> :<br>• Benefit with IG: 0.86 ± 0.12 vs. 0.64 ± 0.10 (p=0.0001) improved single attributes except “hearing” functioning of the patients<br><u>Costs</u> :<br>• benefit of \$0.76±0.15 vs. \$0.64± 0.15 QALY/patient and year; MD: \$ 0.12 (0.07 to 0.16)<br>• incremental cost-utility ratio of \$571 per QALY                                                                                                                                                                                         |
| <b>Adjei 2015</b>                           | Ghana, urban                            | DM                                                                                   | n=200<br>64.5% female                                                                                                                                                              | <u>IG: (n=100):</u> electronical reminder for                                                                                                                                                                                                                 | <u>Primary:</u> Compliance with appointment dates                                                                                                                                                                                                                                                                                                  | After 6 months:<br><u>Adherence to appointment schedules</u>                                                                                                                                                                                                                                                                                                                                                                                                                                                                                     |

| Study name<br>registration<br>number<br>Design | Setting<br>Place,<br>setting and<br>time                                                   | Population<br>Inclusion / Exclusion criteria<br>Characteristics                                                                                                                                                                                                                                                                                                                                                                                                                    | Intervention vs. Control<br>Description with duration                                                                                                                                                                                                                                                                                            | Outcomes<br>Primary and secondary                                                                                                                                                                                                                                                                                                                                                                                          | Results<br>Longest follow-up period with<br>intervention effects (IG vs. CG) with<br>SD, 95%-CI or p value                                                                                                                |                                                                                                                                                                                                                                                                                                                                                                                                                                                                                                                                                                                                 |
|------------------------------------------------|--------------------------------------------------------------------------------------------|------------------------------------------------------------------------------------------------------------------------------------------------------------------------------------------------------------------------------------------------------------------------------------------------------------------------------------------------------------------------------------------------------------------------------------------------------------------------------------|--------------------------------------------------------------------------------------------------------------------------------------------------------------------------------------------------------------------------------------------------------------------------------------------------------------------------------------------------|----------------------------------------------------------------------------------------------------------------------------------------------------------------------------------------------------------------------------------------------------------------------------------------------------------------------------------------------------------------------------------------------------------------------------|---------------------------------------------------------------------------------------------------------------------------------------------------------------------------------------------------------------------------|-------------------------------------------------------------------------------------------------------------------------------------------------------------------------------------------------------------------------------------------------------------------------------------------------------------------------------------------------------------------------------------------------------------------------------------------------------------------------------------------------------------------------------------------------------------------------------------------------|
| RCT                                            |                                                                                            | age (yrs):<br>< 50 yrs: 63 %<br>> 50 yrs: 37 %<br>fasting glucose<br>(mmol/l): 10.4±3.8                                                                                                                                                                                                                                                                                                                                                                                            | clinical appointments of<br>patients + alert system<br>for abnormal laboratory<br>results<br>vs.<br><u>CG: (n=100):</u><br>usual diabetes care,<br>paper based method<br><u>Duration: 6 months</u>                                                                                                                                               | <u>Other:</u> metabolic risk<br>factors, BMI                                                                                                                                                                                                                                                                                                                                                                               | (%)<br>Benefit for IG: 97.8 vs. 89.4 (p=0.010)<br><u>Fasting glucose (mmol/l):</u><br>Benefit for IG: 8.04±2.14 vs. 8.85±2.63;<br>MD 0.4 (-0.59 to -0.36, p=0.022)                                                        |                                                                                                                                                                                                                                                                                                                                                                                                                                                                                                                                                                                                 |
| <b>Amendezo<br/>2017</b><br>NCT02032108<br>RCT | Rwanda,<br>urban,<br>tertiary care                                                         | DM2>3mths, age>21yrs<br>no pregnancy or severe co-<br>morbid illnesses.                                                                                                                                                                                                                                                                                                                                                                                                            | n=251<br>69.3% females<br>age (yrs): 50.9 ±10.9<br>BMI (kg/m <sup>2</sup> ): 27.9<br>(27.0-28.5)<br>duration of diabetes :<br><10 yrs: 73.7%, >10<br>yrs: 16.3%<br>HbA1c (%): 8.98±8.6-<br>9.3                                                                                                                                                   | <u>IG (n=115):</u><br>standard care plus<br>monthly lifestyle<br>education sessions of 45<br>min duration<br>vs.<br><u>CG (n=108):</u> standard<br>care<br><u>Duration: 12 months</u>                                                                                                                                                                                                                                      | <u>Primary:</u> difference in<br>HbA1c<br><u>Secondary:</u> fasting<br>glucose, systolic and<br>diastolic blood pressure,<br>BMI                                                                                          | after 12 months:<br><u>HbA1c (%):</u><br>Benefit for IG with median reductions<br>of -1.70 (-2.09 to -1.31) vs. -0.52 (-0.95<br>to -0.10); MD: -0.72 ( -1.14 to -0.30;<br>p< 0.001)<br><u>Fasting glucose (mmol/L):</u><br>6.9 (6.45 to 7.36) vs. 9.02 (8.18 to<br>9.87) (p<0.001)                                                                                                                                                                                                                                                                                                              |
| <b>Chraibi 2017</b><br>NCT01589653<br>RCT      | Egypt,<br>Indonesia,<br>Morocco,<br>Saudi<br>Arabia,<br>Vietnam<br><br>05/2012-<br>07/2015 | DM2 with diagnosis ≥ 12<br>months, age≥18 , currently<br>being treated with NPH<br>Insulin for ≥ 3 months +<br>metformin (1000-1500 mg)<br>for ≥ 2 months, HbA1c ≥ 7.0%<br>≤10%, BMI ≤ 40.0 kg/m <sup>2</sup><br><br>no treatment with<br>thiazolidinedione, glucagon-<br>like peptide-1 receptor<br>agonists, pramlintide within<br>the last 3 months , >1 IU/kg<br>NPH insulin daily; previous<br>use of premixed or bolus<br>insulin, > 1 severe<br>hypoglycemic episode during | n=155<br>74.9 % female<br>age (yrs): 54.5 ±10.0<br>BMI (kg/m <sup>2</sup> ):<br>29.05±4.9<br>HbA1c (%): 8.6 ±0.83<br>fasting glucose<br>(mmol/L): 8.97<br>duration of diabetes<br>(yrs): 9.5±5.8<br>African patients:<br>• Egypt: 25.75 %<br>• Morocco: 27.7 %<br>Diabetic nephropathy<br>/ neuropathy /<br>retinopathy (%): 3.2 /<br>16.1 / 3.2 | <u>IG (n=76):</u><br>patient driven titration of<br>Biphasic insulin aspart 30<br>twice daily, 3 clinic visits<br>vs.<br><u>CG (n=79):</u><br>physician driven titration<br>twice daily, 6 clinic visits<br><br>Titration in both arms<br>according to the titration<br>protocol bases on self-<br>measured plasma glucose<br>values, measured twice<br>daily on 3 preceding days,<br>telephone contact<br>whenever deemed | <u>Primary:</u> change in HbA1c<br><u>Secondary:</u> proportion of<br>patients achieving the<br>ADA target of HbA1c<br><7.0 % and the HbA1c<br>target of <6.5 % after<br>20 weeks, FPG changes,<br>hypoglycemic episodes, | Change over 5 months:<br><u>HbA1c (%):</u><br>• Decreased in both arms with non-<br>inferiority between groups: MD -0.23<br>(-0.54 to 0.08)<br>• More patients reached HbA1c <7.0%:<br>40.8 vs. 29.1 %, RR: 1.79 (0.87 to 3.65)<br>and <6.5%: 25 vs. 19 %; RR: 1.52 (0.67<br>to 3.46)<br>• More patients reached target HbA1c<br>levels without severe or minor<br>hypoglycemic episodes: <7.0%: 38 vs.<br>27.8 %, RR: 1.52 (0.61 to 3.79), <6.5%:<br>18 vs. 14.8 %; RR 1.13 (0.36 to 3.52)<br><u>FPG (mmol/l):</u><br>• Decreased in both arms with no<br>difference between groups: 0.95±0.28 |

| Study name<br>registration<br>number<br>Design                   | Setting<br>Place,<br>setting and<br>time                           | Population<br>Inclusion / Exclusion criteria                                                                                                                              | Characteristics                                                                                                                                                     | Intervention vs. Control<br>Description with duration                                                                                                                                                                                                                                                              | Outcomes<br>Primary and secondary                                                                                                                                                                                                  | Results<br>Longest follow-up period with<br>intervention effects (IG vs. CG) with<br>SD, 95%-CI or p value                                                                                                                                                                                                                                                                                                                       |
|------------------------------------------------------------------|--------------------------------------------------------------------|---------------------------------------------------------------------------------------------------------------------------------------------------------------------------|---------------------------------------------------------------------------------------------------------------------------------------------------------------------|--------------------------------------------------------------------------------------------------------------------------------------------------------------------------------------------------------------------------------------------------------------------------------------------------------------------|------------------------------------------------------------------------------------------------------------------------------------------------------------------------------------------------------------------------------------|----------------------------------------------------------------------------------------------------------------------------------------------------------------------------------------------------------------------------------------------------------------------------------------------------------------------------------------------------------------------------------------------------------------------------------|
|                                                                  |                                                                    | the previous 12 month,<br>impaired kidney or hepatic<br>function, proliferative<br>retinopathy or maculopathy<br>requiring treatment                                      | Macroangiopathy (%):<br>5.2                                                                                                                                         | necessary<br><u>Duration</u> : 20 weeks                                                                                                                                                                                                                                                                            |                                                                                                                                                                                                                                    | vs. 0.67±0.28; MD: -0.28 (-1.07 to 0.52)<br><u>Costs</u><br>• Less frequent clinic visits to healthcare<br>professionals in IG: 4.8±0.65 vs.<br>7.5±1.42 visits/patient<br><u>Complications</u> :<br>• hypoglycemic episodes: no difference:<br>608.4 vs. 789.2 / 100 patient-years of<br>exposure; RR: 0.74 (0.44; 1.23)<br>treatment-emergent AEs: no<br>difference: 324.2 vs. 302.2 events /<br>100 patient-years of exposure |
| <b>Debussche<br/>2018</b><br>NCT01485913<br><br>RCT              | Mali,<br>urban,<br>secondary<br>care,<br><br>07/2011-<br>02/2013   | DM2, age 30-80 yrs,<br>HbA1c ≥ 8 %,<br><br>no DM1, severe diabetes<br>complications or concomitant<br>illnesses that threatened<br>their functional or vital<br>prognosis | n=151<br>76.2% female<br>age (yrs): 52.5±9.8<br>BMI (kg/m <sup>2</sup> ):28.6±5.4                                                                                   | <u>IG (n=76)</u> :<br>peer-led structured<br>patient education<br>received culturally<br>tailored structured<br>patient education (3<br>courses of 4 sessions)<br>delivered in the<br>community by five<br>trained peer educators<br>vs.<br><u>CG (n=75)</u> : conventional<br>care alone<br><u>Duration</u> :1 yr | <u>Primary</u> : HbA1c<br><u>Secondary</u> :<br>anthropometric<br>indicators (weight and<br>BMI, waist<br>circumference), SBP, DBP,<br>anti-diabetic and anti-<br>hypertensive treatment,<br>knowledge score, dietary<br>practices | Change to 12 months<br><u>HbA1c (%)</u> :<br>• Benefit in IG: MD 1.05 % (-1.54;-<br>0.56) vs. -0.15 % (-0.56; 0.26) (p =<br>0.006)                                                                                                                                                                                                                                                                                               |
| <b>Essien<br/>2017</b><br><br>PACTR201302<br>00047835<br><br>RCT | Nigeria,<br>urban,<br>tertiary<br>care,<br><br>09/2013-<br>05/2014 | DM1 or DM2, age: ≥ 18 yrs,<br>HbA1c> 8.5 %, able to engage<br>in moderate exercise,<br><br>no eye disease that would<br>limit the ability to read                         | n=118<br>60.2 % female<br>age (yrs): 52.7±10.5<br>BMI (kg/m <sup>2</sup> ):<br>28.9±7.5<br>HbA1c (%):10.7±1.6<br>type of diabetes<br>• DM1: 14.4 %<br>• DM2: 85.6 % | <u>IG: (n=59)</u> :<br>intensive and systematic<br>disease self-management<br>education programme<br>(invitation and<br>encouragement by<br>clinical staff to attend 12<br>structured teaching<br>sessions)<br>vs.                                                                                                 | <u>Primary</u> : HbA1c                                                                                                                                                                                                             | After 6 months:<br><u>HbA1c (%)</u> :<br>8.4 (8 to 8.9) vs. 10.2 (9.8 to 10.7);<br>MD <sub>a</sub> : -1.8 (-2.4 to -1.2); (p < 0.0001)                                                                                                                                                                                                                                                                                           |

| Study name<br>registration<br>number<br>Design               | Setting<br>Place,<br>setting and<br>time                                            | Population<br>Inclusion / Exclusion criteria                                                                                                                                                    | Characteristics                                                                                                                                                                                                                                     | Intervention vs. Control<br>Description with duration                                                                                                                                                                                                                                                                                                                                                                  | Outcomes<br>Primary and secondary                                                                                                                                             | Results<br>Longest follow-up period with<br>intervention effects (IG vs. CG) with<br>SD, 95%-CI or p value                                                                                                                                                                                                                                           |
|--------------------------------------------------------------|-------------------------------------------------------------------------------------|-------------------------------------------------------------------------------------------------------------------------------------------------------------------------------------------------|-----------------------------------------------------------------------------------------------------------------------------------------------------------------------------------------------------------------------------------------------------|------------------------------------------------------------------------------------------------------------------------------------------------------------------------------------------------------------------------------------------------------------------------------------------------------------------------------------------------------------------------------------------------------------------------|-------------------------------------------------------------------------------------------------------------------------------------------------------------------------------|------------------------------------------------------------------------------------------------------------------------------------------------------------------------------------------------------------------------------------------------------------------------------------------------------------------------------------------------------|
|                                                              |                                                                                     |                                                                                                                                                                                                 |                                                                                                                                                                                                                                                     | <u>CG (n=59):</u> conventional<br>disease-self-management<br>education<br><u>Duration:</u> 6 months                                                                                                                                                                                                                                                                                                                    |                                                                                                                                                                               |                                                                                                                                                                                                                                                                                                                                                      |
| <b>Fairall 2016</b><br>ISRCTN20283<br>604<br><br>Cluster-RCT | South Africa<br>,<br>urban/rural,<br>primary<br>care,<br><br>03/2011 –<br>11 / 2011 | age ≥ 18 yrs , clinics providing<br>service for NCD Patients with<br>DM, hypertension, chronic<br>respiratory disease or<br>depression, with self-<br>reported hypoglycaemic (in<br>case of DM) | n= 38 public sector<br>primary care clinics,<br>4393 patients,<br>n=1842 with DM<br>73 % female<br>age (yrs):median,<br>IQR): 52 (42-61) vs. 52<br>(44-62)<br>BMI (kg/m <sup>2</sup> ): 30±8<br>HbA1c (%):9 (4-17), in<br>HbA1c in DM≥ 7 %:<br>77 % | <u>IG (n=2166, 851 with<br/>DM):</u><br>Nurses were trained to<br>use a primary care<br>programme to support<br>and expand nurses`role in<br>NCD care and contains a<br>clinical management tool<br>with enhances<br>prescribing provisions<br>vs.<br><u>CG (n=2227, 991 with<br/>DM):</u><br>Nurses continued to use<br>the Lung Health and<br>HIV/AIDS approach with<br>usual training<br><u>Duration:</u> 14 months | <u>Primary (for DM):</u><br>treatment intensification<br>(addition or increase in<br>dose of metformin and/or<br>sulphonylurea, insulin,<br>ACE-inhibitor, aspirin,<br>statin | over 14 months<br><u>HbA1c (%):</u><br>• <7 %: 41 vs. 38 %; RR 1.08 (0.77 to<br>1.52; p=0.638)<br>• 7-10 %: 69 vs. 55 %; RR 1.30 (1.16 to<br>1.47; p<0.001)<br>• >10 %: 71 vs. 73 %; RR 0.97 (0.81 to<br>1.16; p=0.703)<br><u>Treatment intensification rates* (%):</u><br>• 57% vs. 50%, RRa: 1.11 (0.99 to 1.26)<br>(p=0.083) for patients with DM |
| <b>Hailu 2018</b><br>NCT03185689<br><br>RCT                  | Ethiopia,<br>urban,<br><br>02/2016-<br>10/2017                                      | DM2, age > 18 yrs<br><br>no DM1 or GDM, pregnant<br>women, severe cognitive or<br>physical impairment, and<br>terminally ill people                                                             | n=220<br>33 % female<br>age (yrs): 54.5±10<br>BMI (kg/m <sup>2</sup> ):25±4<br>HbA1c (%):10.5±4                                                                                                                                                     | <u>IG (n= 116):</u><br>Nurse-led disease-<br>management education:<br>6 sessions, supported<br>with illustrative pictures<br>handbooks and fliers,<br>customized to local<br>conditions by trained<br>nurses<br>vs.<br><u>CG (n=104):</u><br>usual follow-up care<br><u>Duration:</u> 9 months                                                                                                                         | <u>Primary:</u><br>patients with target<br>HbA1c ( ≤ 7 %)<br><u>Secondary:</u> systolic and<br>diastolic blood pressure,<br>fasting glucose, BMI,<br>waist circumference      | Change over 9 months:<br><u>HbA1c (%):</u><br>• No difference: 45 % vs. 50 % with<br>target values (p=0.21), MD: 2.88% (-<br>3.85 to -1.92) vs. 2.57% (-3.47 to -<br>1.67)<br><u>fasting glucose (mg/dl):</u><br>• Benefit with IG: 36 % vs.25 % with<br>target values, MD: -27 ( -45 to -9;<br>p=0.003)                                             |

| Study name                                             | Setting                                                    | Population                                                                                                                                                                    | Intervention vs. Control                                                                                                                                                                        | Outcomes                                                                                                                                                                                                                                                                                                                                                           | Results                                                                                                                                                                                                                                                                                                                               |                                                                                                                                                                                                                                                                                                                                                                                                                                                                                                                                                                                                           |
|--------------------------------------------------------|------------------------------------------------------------|-------------------------------------------------------------------------------------------------------------------------------------------------------------------------------|-------------------------------------------------------------------------------------------------------------------------------------------------------------------------------------------------|--------------------------------------------------------------------------------------------------------------------------------------------------------------------------------------------------------------------------------------------------------------------------------------------------------------------------------------------------------------------|---------------------------------------------------------------------------------------------------------------------------------------------------------------------------------------------------------------------------------------------------------------------------------------------------------------------------------------|-----------------------------------------------------------------------------------------------------------------------------------------------------------------------------------------------------------------------------------------------------------------------------------------------------------------------------------------------------------------------------------------------------------------------------------------------------------------------------------------------------------------------------------------------------------------------------------------------------------|
| registration number                                    | Place, setting and time                                    | Inclusion / Exclusion criteria                                                                                                                                                | Description with duration                                                                                                                                                                       | Primary and secondary                                                                                                                                                                                                                                                                                                                                              | Longest follow-up period with intervention effects (IG vs. CG) with SD, 95%-CI or p value                                                                                                                                                                                                                                             |                                                                                                                                                                                                                                                                                                                                                                                                                                                                                                                                                                                                           |
| Design                                                 |                                                            | Characteristics                                                                                                                                                               |                                                                                                                                                                                                 |                                                                                                                                                                                                                                                                                                                                                                    |                                                                                                                                                                                                                                                                                                                                       |                                                                                                                                                                                                                                                                                                                                                                                                                                                                                                                                                                                                           |
| <b>Labhardt 2011</b><br>NCT00744458<br><br>Cluster-RCT | Cameroon rural, primary care,<br><br>08/2008-02/2010       | newly detected adult patients with DM2 and /or hypertension in the catchment area of nurse-led health centres, staffed, equipped and trained to care for DM2 and hypertension | n=33 facilities, 221 patients<br>64% females<br>age (yrs): 59.8±12.7<br>diabetes: 15.4 %<br>Overweight (BMI 25-29.9 kg/m <sup>2</sup> ): 28.5 %<br>Obesity (BMI> 30 kg/m <sup>2</sup> ): 20.4 % | <u>IG 1 (11 centres, n=55): incentive group</u><br>free treatment for 1 months for patients who regularly attended follow up visits<br>vs.<br><u>IG 2 (11 centres, n=77): letter group:</u> reminder letters in case of a missed follow-up visit<br>vs.<br><u>CG (11 centres, n=89):</u> no additional intervention<br><u>Duration:</u> 12 months                  | <u>Primary:</u><br>Patient retention at 1 yr (≥ 12 follow-up visits within 12 months)<br><u>Secondary:</u><br>Adherence with timely attendance of follow-up visit schemes and changes in blood pressure and blood glucose levels.                                                                                                     | After 12 months:<br><u>Retention rates (%):</u><br>• Benefit for IG1 and IG2 vs.CG: 60 vs. 65 vs. 29 %; MD 34 (21 to 46) with no differences between IG1 and IG2; MD -5 (-22 to 12)<br><u>Loss to follow-up:</u><br>• Benefit for IG1 and IG2: IG1 vs. CG: HR 0.44 (0.27 to 0.72; p< 0.001)<br>• IG2 vs. CG: HR 0.38 (0.24 to 0.61; p<0.001)<br><u>Adherence (%):</u><br>• Benefit for IG1 and IG2: 38 vs. 35 vs. 10; MD 26 (14 to 42), IG1 vs CG: MD 28(13 to 37); IG2 vs. CG: MD 25 (13 to 37)<br>• no difference between IG1 and IG2: MD 3 (-14 to 20)<br><u>FPG:</u><br>No differences between groups |
| <b>Mash 2014</b><br><br>Cluster RCT                    | South Africa, urban, primary care,<br><br>12/2010 -12/2012 | DM2 with any therapy attending community health centres in the working class areas of Cape Town Metropole<br><br>no DM1, dementia, mental illness or acute illness            | n=34 public sector community health centres, 1570 patients<br>73.8% females<br>age (yrs): 56.1±11.6<br>HbA1c (%): 9.1±2.3                                                                       | <u>IG (17 health centres, n=710):</u><br>4 monthly sessions lasting 60 min with group education about diabetes topics (understanding diabetes and medication, living a healthy lifestyle and preventing complications), delivered by a health promotion officer vs.<br><u>CG (17 health centres, n=860):</u><br>usual care: ad hoc advice during consultations and | <u>Primary:</u><br>improvement of diabetes self-care activities (5 % weight loss, and a 1 % reduction in HbA1c level)<br><u>Secondary:</u><br>improved diabetes specific self-efficacy, locus of control, mean blood pressure, mean weight loss, mean waist circumference, mean HbA1c, mean total cholesterol levels, quality of life | After 12 months:<br><u>HbA1c (%):</u><br>No differences: 8.4±2.0 vs. 8.8±2.2; MD <sub>a</sub> : 0.01 (-0.27 to 0.28; p=0.967)<br><u>Adherence (self-care activities):</u><br>No differences in scores of physical activity, use of diet plan or medication, foot care or frequency of smoking<br><u>Quality of life:</u><br>No differences in physical functioning, role or social functioning, mental or general health and pain<br><u>Costs:</u><br>Incremental cost effectiveness ratio: 1862 Dollar/ QALY gained                                                                                      |

| Study name                                                 | Setting                                                       | Population                                                                                                                                                                                                                                                                                                                                                                                                                                                                                                                                    |                                                                                                                                                                                                                                                                                            | Intervention vs. Control                                                                                                                                                                                                                                                                                                                                                       | Outcomes                                                                                                                                                                                                                                 | Results                                                                                                                                           |
|------------------------------------------------------------|---------------------------------------------------------------|-----------------------------------------------------------------------------------------------------------------------------------------------------------------------------------------------------------------------------------------------------------------------------------------------------------------------------------------------------------------------------------------------------------------------------------------------------------------------------------------------------------------------------------------------|--------------------------------------------------------------------------------------------------------------------------------------------------------------------------------------------------------------------------------------------------------------------------------------------|--------------------------------------------------------------------------------------------------------------------------------------------------------------------------------------------------------------------------------------------------------------------------------------------------------------------------------------------------------------------------------|------------------------------------------------------------------------------------------------------------------------------------------------------------------------------------------------------------------------------------------|---------------------------------------------------------------------------------------------------------------------------------------------------|
| registration number<br>Design                              | Place, setting and time                                       | Inclusion / Exclusion criteria                                                                                                                                                                                                                                                                                                                                                                                                                                                                                                                | Characteristics                                                                                                                                                                                                                                                                            | Description with duration                                                                                                                                                                                                                                                                                                                                                      | Primary and secondary                                                                                                                                                                                                                    | Longest follow-up period with intervention effects (IG vs. CG) with SD, 95%-CI or p value                                                         |
|                                                            |                                                               |                                                                                                                                                                                                                                                                                                                                                                                                                                                                                                                                               |                                                                                                                                                                                                                                                                                            | occasional educational talks in waiting room<br><u>Duration:</u> 12 months                                                                                                                                                                                                                                                                                                     |                                                                                                                                                                                                                                          |                                                                                                                                                   |
| <b>Muchiri 2015</b><br><br>RCT                             | South Africa, rural, primary care,<br><br>04/2010-11/2011     | DM2, age 40-70 yrs attending community health centres, HbA1c ≥ 8 %, blood sugar levels ≥ 10 mmol/l, duration of diabetes ≥ 1 yr<br><br>no insulin therapy, pregnant women, full time employed                                                                                                                                                                                                                                                                                                                                                 | n=82<br>86.6 % female<br>age (yrs): 59±7.4<br>BMI(kg/m <sup>2</sup> ): 30.9±6.9<br>HbA1c (%): 11.1±2.0<br>duration of diabetes (yrs): 6                                                                                                                                                    | <u>IG (n=41):</u><br>education materials+ 8 weekly group educational sessions about diabetes and nutrition, follow-up sessions+vegetable gardening<br><u>CG (n=41):</u><br>education materials<br><u>Duration:</u> 12 months                                                                                                                                                   | <u>Primary:</u> HbA1c<br><u>Secondary:</u><br>Other clinical outcomes (BMI, blood pressure and blood lipids), HbA1c, dietary behaviours                                                                                                  | over 12 months<br><u>HbA1c (%):</u><br>no difference: 9.8±1.92 vs. 10.4±1.92; MD -0.63 (-0.26 to 1.50; p=0.16)                                    |
| <b>Owolabi 2019</b><br>PACTR201810<br>599931422<br><br>RCT | South Africa urban/rural, primary care<br><br>07/2018-04/2019 | DM, age ≥18 yrs, DM diagnosed at least in the last 6 months, currently receiving treatment at the selected clinics, on stable medication for ≥ 3 months prior to recruitment, uncontrolled glycaemic control, in possession of a mobile phone, able to retrieve and read SMSs and willing to receive SMSs<br><br>health or mental conditions that could interfere with the study, pregnant or planning to get pregnant within the next 6 months, debilitated or handicapped in such a way that obtaining anthropometric measurements could be | n=216<br>84.3 % females<br>age (yrs): 60.6±11.6<br>DM2 (%): 94<br>Treated with oral pills (%): 75.5<br>Duration of DM (yrs): 9.1±7.4<br>Duration of DM treatment (yrs): 8.8±7.2<br>Hypertension (%): 83.0<br>Random blood glucose (mmol/L): 14.34±3.9<br>BMI(kg/m <sup>2</sup> ): 32.2±6.2 | <u>IG (n=108):</u><br>daily SMS text-messaging SMS at an agreed time of the day, according to their needs, care plan and goal with motivational and support messages, advice on lifestyle behaviours (e.g. diets, physical activity, smoking cessation, medication and appointment reminders)<br>vs.<br><u>CG (n=108):</u><br>usual diabetes care<br><u>Duration:</u> 6 months | <u>Primary:</u> Morning random blood sugar<br><u>Secondary:</u><br>co-morbid outcomes (hypertension and obesity), obtained through blood pressure measurement, anthropometric measurements (body weight, BMI) acceptability, feasibility | Over 6 months:<br><u>Blood glucose levels</u> (mmol/L):<br>-1.58±5.29 vs. -1.95±4.69; MD 0.51(-0.8 to 1.82), MD <sub>a</sub> 0.26 (-0.81 to 1.32) |

| Study name<br>registration<br>number<br>Design | Setting<br>Place,<br>setting and<br>time                        | Population<br>Inclusion / Exclusion criteria                                                                                                                                                                                                                                                                                                                                     | Population<br>Characteristics                                                                                                                                                                                                                     | Intervention vs. Control<br>Description with duration                                                                                                                                                                                                                                                                                                                           | Outcomes<br>Primary and secondary                                                                                                      | Results<br>Longest follow-up period with<br>intervention effects (IG vs. CG) with<br>SD, 95%-CI or p value                                                                          |
|------------------------------------------------|-----------------------------------------------------------------|----------------------------------------------------------------------------------------------------------------------------------------------------------------------------------------------------------------------------------------------------------------------------------------------------------------------------------------------------------------------------------|---------------------------------------------------------------------------------------------------------------------------------------------------------------------------------------------------------------------------------------------------|---------------------------------------------------------------------------------------------------------------------------------------------------------------------------------------------------------------------------------------------------------------------------------------------------------------------------------------------------------------------------------|----------------------------------------------------------------------------------------------------------------------------------------|-------------------------------------------------------------------------------------------------------------------------------------------------------------------------------------|
| challenging                                    |                                                                 |                                                                                                                                                                                                                                                                                                                                                                                  |                                                                                                                                                                                                                                                   |                                                                                                                                                                                                                                                                                                                                                                                 |                                                                                                                                        |                                                                                                                                                                                     |
| <b>Sodipo 2017</b><br>RCT                      | Nigeria,<br>primary<br>care,<br><br>03/2013-<br>11/2013         | DM2 ≥ 18 yrs. on antidiabetic<br>medication<br><br>no patients with<br>emergencies, chronic<br>complications such as<br>nephropathy, neuropathy<br>etc., those already using<br>glucometer                                                                                                                                                                                       | n=120<br>gender: 50% female<br>age (yrs): 59±10.95<br>HbA1c (%): 8.7±2.45<br>fasting glucose<br>(mg/dl): 152±60.9<br>duration of diabetes<br>(yrs): 50%> 3yrs                                                                                     | <u>IG (n=60):</u><br>Self-monitoring of blood<br>glucose before and after<br>meals 3 days a week for<br>12 weeks<br><u>CG (n=60); non SMBG</u><br><u>Duration: 12 wks</u>                                                                                                                                                                                                       | HbA1C, fasting glucose                                                                                                                 | after 3 months:<br><u>HbA1c (%):</u><br>No difference: 7.2±2.0 vs. 7.7±2.0 (p=<br>0.174)<br>fasting glucose (mg/dl):<br>No difference: 123.2±35.1 vs.<br>137.6±50.1 (p=0.087)       |
| <b>Steyn 2013</b><br><br>Cluster-RCT           | South<br>Africa,<br>urban,<br>primary<br>care,<br><br>1999-2000 | public sector primary health<br>care clinics (CHC) with ≥ 25<br>diabetes and ≥ hypertension<br>patients<br>age ≥15yrs, a documented<br>attende at the particular<br>CHC with ≥ 4 visits during the<br>previous year for<br>hypertension or diabetes who<br>received treatment for these<br>conditions at each visit<br><br>no patients being unable to<br>answer a questionnaire | 18 community health<br>centres<br>n=1096, of them<br>n= 456 with DM<br>age (yrs): 58.3 ± 11<br>gender:74 % females<br>BMI (kg/m <sup>2</sup> ):<br>30.7 ± 6.2<br>Type of Diabetes:<br>• DM1: 5.8%<br>• DM2: 91.35%<br>uncertain DM type:<br>2.85% | <u>IG (9 clinics, n=229):</u><br>introduction of structured<br>clinical record with<br>guidelines prompts after<br>training of doctors in<br>their use and suggestions<br>to incorporate them in<br>regular patient records,<br>contact over 1 year<br>vs.<br><u>CG (9 clinics, n= 227):</u><br>usual care with passively<br>disseminated guidelines<br><u>Duration: 1 year</u> | <u>primary:</u> HbA1C in the<br>diabetes group<br><u>secondary:</u><br>uncontrolled glycaemia<br>(HbA1c ≥7%) in the<br>diabetes group. | After 3 months:<br><u>HbA1c (%):</u><br>IG: 8.8% vs. 8.8%; MDa -1.0 (-1.1 to -<br>0.9)<br><u>HbA1c ≥7% (%):</u><br>no relevant difference: 64.1 vs. 62.6;<br>MD 0.90 (0.53 to 1.53) |
| <b>Takenga 2014</b><br><br>RCT                 | Congo,<br>urban                                                 | DM2, 35-75 yrs                                                                                                                                                                                                                                                                                                                                                                   | n=40<br>20 % females<br>age (yrs): 53.3 ± 10.1<br>HbA1c (%): 8.63                                                                                                                                                                                 | <u>IG (n=20):</u><br>self-management of<br>diabetes with Mobil DIAB<br>(telemedical approach)<br><br><u>vs.</u><br><u>CG (n=20):</u><br>conventional therapy<br>without telemedical<br>system                                                                                                                                                                                   | <u>primary:</u> HbA1c                                                                                                                  | after 2 months:<br><u>HbA1c (%):</u><br>Benefit for IG: 6.73±1.59 vs. vs.<br>8.6±1.35 (MD -1.87 (-2.91 to -0.83)                                                                    |

| Study name<br>registration<br>number<br>Design            | Setting<br>Place,<br>setting and<br>time                          | Population<br>Inclusion / Exclusion criteria                                                                                                                                                                                                                                                             | Characteristics                                                                                                                                                                                                                                                                                                                                                | Intervention vs. Control<br>Description with duration                                                                                                                                                                               | Outcomes<br>Primary and secondary                                                                                                                                                                               | Results<br>Longest follow-up period with<br>intervention effects (IG vs. CG) with<br>SD, 95%-CI or p value                                                                                                                                                                                                                                                                                                                                                                                                                             |
|-----------------------------------------------------------|-------------------------------------------------------------------|----------------------------------------------------------------------------------------------------------------------------------------------------------------------------------------------------------------------------------------------------------------------------------------------------------|----------------------------------------------------------------------------------------------------------------------------------------------------------------------------------------------------------------------------------------------------------------------------------------------------------------------------------------------------------------|-------------------------------------------------------------------------------------------------------------------------------------------------------------------------------------------------------------------------------------|-----------------------------------------------------------------------------------------------------------------------------------------------------------------------------------------------------------------|----------------------------------------------------------------------------------------------------------------------------------------------------------------------------------------------------------------------------------------------------------------------------------------------------------------------------------------------------------------------------------------------------------------------------------------------------------------------------------------------------------------------------------------|
| <u>Duration:</u> 60 days                                  |                                                                   |                                                                                                                                                                                                                                                                                                          |                                                                                                                                                                                                                                                                                                                                                                |                                                                                                                                                                                                                                     |                                                                                                                                                                                                                 |                                                                                                                                                                                                                                                                                                                                                                                                                                                                                                                                        |
| <b>Tawfik 2016</b><br><br>RCT                             | Egypt,<br>urban,<br>primary<br>care,<br><br>05/2015-<br>09/2015   | DM2 for $\geq 1$ yr, 40-79 yrs<br>attending an outpatient clinic<br><br>no patients who were already<br>using a similar medication<br>chart, severe or terminal<br>health conditions, or patients<br>with behavioural health issue<br>that could make it difficult to<br>understand the<br>communication | n=255<br>53.7 % females<br>age (yrs): 55.7 $\pm$ 8.35<br>HbA1c (%): 8.14 $\pm$ 1.3<br>duration of diabetes<br>(yrs): 8.3 $\pm$ 1.3                                                                                                                                                                                                                             | <u>IG (n=127):</u><br>comprehensive<br>cardiovascular risk<br>communication<br>vs.<br><u>CG (n=128):</u><br>standard usual care<br><u>Duration:</u> 3 months                                                                        | <u>Primary:</u> HbA1c<br><u>Secondary:</u><br>Cardiovascular risk<br>perception, diabetes self-<br>care, cardiovascular risk<br>scores                                                                          | After 3 months:<br><u>HbA1c (%):</u><br>Benefit for IG: 7.5 $\pm$ 0.8 vs. 8.12 $\pm$ 0.9;<br>MD -0.62 (-0.85 to -0.39)<br><u>controlled HbA1c (%):</u><br>32.7 vs. 29.9                                                                                                                                                                                                                                                                                                                                                                |
| <b>Thuita 2020</b><br>PACTR201910<br>518676391<br><br>RCT | Kenya<br>Secondary<br>care<br>recruitment<br>08/2016 -<br>10/2016 | DM2, 20-79 yrs with regular<br>attendance of an outpatient<br>clinic<br><br>Pregnancy, complications<br>such as renal failure,<br>congestive heart failure, or<br>stroke                                                                                                                                 | n=153<br>59.5 % females<br>age (yrs). 56 $\pm$ 11.6<br>Family history of DM<br>(%): 46.6<br>Poor glycaemic<br>control (%) with<br>HbA1c>7%: 77.8<br>DM for 1-5 yrs (%):<br>58.2 %<br>Years with DM:<br>6.7 $\pm$ 6.9<br>Oral medications (%):<br>82.4<br>BMP (kg/m2): 27 $\pm$ 4.6<br>HbA1c (%): 8.49 $\pm$ 1.9<br>fasting glucose<br>(mmol/l): 11.0 $\pm$ 3.3 | <u>IG2 (n=51):</u><br>nutrition education<br>programme for 2 hrs<br>/week with peer-to-peer<br>support<br>vs.<br><u>IG1 (n=51):</u><br>Education programme<br>vs.<br><u>CG (n=51):</u><br>Standard care<br><u>Duration:</u> 8 weeks | <u>Primary:</u> metabolic<br>syndrome prevalence<br>(MetS)<br><u>Other:</u> anthropometry<br>and clinical data, blood<br>pressure, blood glucose<br>and lipid profile, physical<br>activity levels, food intake | After 6 months:<br><u>Metabolic syndrome prevalence:</u> lower<br>with IG2:<br>Harmonized criteria:52.1 vs.69.4 vs.<br>91.3 (p<0.001)<br>WHO: 58.3 vs. 77.6 vs. 89.1 (p=0.003)<br><u>HbA1c (%):</u><br>Mean change: no differences -<br>2.04 $\pm$ 2.70 vs. 1.48 $\pm$ 2.73 vs. -0.73 $\pm$ 2.71<br>High HbA1c: no differences: 47.9 vs.<br>29.0 vs. 34.8 %<br><u>fasting glucose (mmol/l):</u><br>no differences: -2.59 $\pm$ 0.66 vs. -<br>2.95 $\pm$ 0.64 vs. -1.55 $\pm$ 0.68<br>high fasting glucose: 79.2 vs. 83.7 vs.<br>91.3 % |



| Study name                                         | Setting                                                   | Population                                                                                                                                                                                                                               | Intervention vs. Control                                                                                                                                                                                                                                                                                                                                                                                                                                                                                   | Outcomes                                                                                                                                                                                                                                                                                                                                               | Results                                                                                                                                                                                                                                                            |                                                                                                                                                                                                                                                                                                                                                                                                                                                                                                               |
|----------------------------------------------------|-----------------------------------------------------------|------------------------------------------------------------------------------------------------------------------------------------------------------------------------------------------------------------------------------------------|------------------------------------------------------------------------------------------------------------------------------------------------------------------------------------------------------------------------------------------------------------------------------------------------------------------------------------------------------------------------------------------------------------------------------------------------------------------------------------------------------------|--------------------------------------------------------------------------------------------------------------------------------------------------------------------------------------------------------------------------------------------------------------------------------------------------------------------------------------------------------|--------------------------------------------------------------------------------------------------------------------------------------------------------------------------------------------------------------------------------------------------------------------|---------------------------------------------------------------------------------------------------------------------------------------------------------------------------------------------------------------------------------------------------------------------------------------------------------------------------------------------------------------------------------------------------------------------------------------------------------------------------------------------------------------|
| registration number                                | Place, setting and time                                   | Inclusion / Exclusion criteria                                                                                                                                                                                                           | Description with duration                                                                                                                                                                                                                                                                                                                                                                                                                                                                                  | Primary and secondary                                                                                                                                                                                                                                                                                                                                  | Longest follow-up period with intervention effects (IG vs. CG) with SD, 95%-CI or p value                                                                                                                                                                          |                                                                                                                                                                                                                                                                                                                                                                                                                                                                                                               |
| <b>Webb 2015</b><br>NCT01275040<br><br>Cluster RCT | South Africa, urban, primary care,<br><br>06/2010-03/2011 | primary health_care clinics, patients with clinical diagnosis of DM2 or DM1_for ≥5yrs, age ≥ 18 yrs                                                                                                                                      | n= 12 primary health care clinics<br>n= 599<br>gender:68.5 % female<br>age (yrs): 57.8±10.5<br>HbA1c (%): 8.73±2.3<br>HbA1c ≥ 7 %: 73 %<br>BMI (kg/m <sup>2</sup> ): 30.8±6.7<br>Typ of diabetes:<br><ul style="list-style-type: none"> <li>• DM1: 3.7 %,</li> <li>• DM2: 70.3 %</li> <li>• unknown: 26 %</li> </ul> duration of Diabetes:<br><ul style="list-style-type: none"> <li>• &lt; 5 yrs: 47.3 %</li> <li>• 5-10 yrs: 22.0 %</li> <li>• &gt; 10 yrs: 20.2 %</li> <li>• unknown: 10.5 %</li> </ul> | <u>IG (n=328):</u><br>mobile screening team visits primary care clinic and provides education and active screening for diabetic complications (foot, kidney, cardiac and renal complications) vs.<br><u>CG(n=273):</u><br>no mobile screening team, routine care with similar education for patients. and health care workers<br><u>Duration:</u> 1 yr | <u>Primary:</u> HbA1c, detected neuropathy, nephropathy and retinopathy, HbA1c categories<br><u>Secondary:</u> detected complications, referred patients for complication assessment or care, blood pressure and lipid control, costs, LDL cholesterol, creatinine | after 12 months<br><u>HbA1c (%):</u><br>no difference: 8.54±2.11 vs. 8,76 ±2.2, MD-0.22 (-0.64, 0.20)<br><u>screening rate for complications:</u> in IG 60% increase of screening in all complication indicator groups, in both groups testing of HbA1c and renal complications (serum-creatinine) increased , but no significant difference , screening for eye complications, only increased significantly in IG<br>no significant difference in the proportion of actions taken between IG and CG (p=0.83) |
| <b>Strategies to enhance physical activity</b>     |                                                           |                                                                                                                                                                                                                                          |                                                                                                                                                                                                                                                                                                                                                                                                                                                                                                            |                                                                                                                                                                                                                                                                                                                                                        |                                                                                                                                                                                                                                                                    |                                                                                                                                                                                                                                                                                                                                                                                                                                                                                                               |
| <b>Asuako 2017</b><br><br>RCT                      | Ghana, urban, tertiary care,<br><br>08/2015-03/2016       | DM, age: 20-68 yrs, ambulant patients, without diabetes complications with < 150 minutes /wk of moderate physical activity<br>no SBP > 140 or DBP> 90 mmHg, bilateral or unilateral lower or upper limbs amputation, use of insulin pump | n=12<br>83% female<br>age (yrs): 83% were 46-55 yrs.<br>BMI (kg/m <sup>2</sup> ):25.4±4.5<br>fasting glucose (mmol/l):9.33 ± 5.7<br>type of diabetes:<br>DM1: 17 %<br>DM2: 83 %<br>duration of diabetes (yrs):<br><ul style="list-style-type: none"> <li>• 1-5 yrs: 25 %</li> <li>• 6-10 yrs: 50 %</li> <li>• 10 yrs: 25 %</li> </ul>                                                                                                                                                                      | <u>IG (n=7):</u><br>walking aerobic exercise sessions without treadmills (3/week) vs.<br><u>CG (n=5):</u><br>only activity of daily living<br><br>Both continued regular medical/clinical routines<br><u>Duration:</u> 8 weeks                                                                                                                         | FPG, Lipid profile, body weight, BMI<br><br>Change over 2 months:<br><u>FPG (mmol/l):</u><br>Benefit for IG: 6.27 ± 0.91 vs. 8.00 ± 0.96; MD 1.73 (-1.88 to -1.59; p<0.001)                                                                                        |                                                                                                                                                                                                                                                                                                                                                                                                                                                                                                               |

| Study name<br>registration<br>number<br>Design | Setting<br>Place,<br>setting and<br>time             | Population<br>Inclusion / Exclusion criteria<br>Characteristics                                                                                                                                                                                                                    | Intervention vs. Control<br>Description with duration                                                                                                                                                     | Outcomes<br>Primary and secondary                                                                                                                                                                                                                                  | Results<br>Longest follow-up period with<br>intervention effects (IG vs. CG) with<br>SD, 95%-CI or p value                                                                                                                                                                                                                                                                                                              |
|------------------------------------------------|------------------------------------------------------|------------------------------------------------------------------------------------------------------------------------------------------------------------------------------------------------------------------------------------------------------------------------------------|-----------------------------------------------------------------------------------------------------------------------------------------------------------------------------------------------------------|--------------------------------------------------------------------------------------------------------------------------------------------------------------------------------------------------------------------------------------------------------------------|-------------------------------------------------------------------------------------------------------------------------------------------------------------------------------------------------------------------------------------------------------------------------------------------------------------------------------------------------------------------------------------------------------------------------|
| <b>Fayehun 2018</b>                            | Nigeria,<br>urban<br>06/2014-<br>11/2014             | DM2, age 18-64 yrs,<br>Diagnosed $\geq$ 12 months, non-<br>insulin dependent, on dietary<br>control $\pm$ hypoglycemic<br>agents, able to walk without<br>limitations<br><br>no pregnant women,<br>smokers, prescription of<br>medications that might<br>impair ability to walk    | n= 46<br>63 % female<br>age (yrs): 54 $\pm$ 7.7 (33-<br>64)<br>BMI (kg/m <sup>2</sup> ):<br>22.4 $\pm$ 3.3<br>HbA1c (%): 6.6 (5.3-<br>9.0)<br>duration of diabetes<br>(yrs): <7 yrs: 70 %,<br>>7 yrs 30 % | <u>IG (n=23):</u><br>Goal to accumulate<br>10000 steps per day<br>vs.<br><u>CG (n=23):</u><br>normal activity habits<br><u>Duration:</u> 10 weeks                                                                                                                  | <u>Primary:</u> HbA1c<br><u>Secondary:</u> step count<br><br>Change over 2.5 months:<br><u>HbA1c (%):</u><br>Benefit for IG: 6.26 (6.19 to 6.33) vs.<br>6.82 (6.69 to 6.95); MD <sub>a</sub> : -0.74 (-1.32<br>to -0.02; p=0.015)                                                                                                                                                                                       |
| <b>Maharaj 2016</b><br><br>RCT                 | Nigeria,<br>rural<br><br>07/2013-<br>06/2014         | DM2, non- insulin dependent,<br>blood glucose levels 6 -<br>13 mmol/l<br><br>no cardiac, abdominal or<br>spinal surgery $\leq$ 6 months,<br>history of fractures of lower<br>limbs, spine, weakness,<br>deformities, loss of sensation<br>in the feet, retinopathy,<br>nephropathy | n=90<br>52 % females<br>age (yrs): 39.4 $\pm$ 8.6<br>(30-58)<br>BMI (kg/m <sup>2</sup> ): 27.7 $\pm$ 5.8<br>HbA1c (%): 8.79 $\pm$ 2.11<br>duration of diabetes<br>(yrs): 2.5 $\pm$ 2.1                    | <u>IG (n=45):</u><br>rebound exercise 3<br>times/week for 20-<br>30 min, moderate<br>intensity of 40-60 % of HR<br>maximum<br>vs.<br><u>CG (n=45):</u><br>watched videos and read<br>health magazines<br><u>Duration:</u> 9 weeks                                  | <u>Primary:</u><br>HbA1c , FPG, BMI<br><u>Other:</u><br>Heart and respiratory<br>rates, blood pressure,<br>oxygen saturation<br><br>After 9 weeks<br><u>HbA1c (%):</u><br>Benefit for IG: 7.12 $\pm$ 1.19 vs. 8.36 $\pm$ 1.25;<br>MD <sub>a</sub> : 0.904 (0.832 to 0.984; p=0.017)<br><u>FPG (mmol/l):</u><br>Benefit for IG: 6.92 $\pm$ 1.21 vs. 8.73 $\pm$ 1.23;<br>MD <sub>a</sub> : 0.787 (0.7345- 0.841; p=0.002) |
| <b>van Rooijen<br/>2004</b><br><br>RCT         | South<br>Africa,<br>urban<br><br>03/2002-<br>11/2002 | black women with DM2, age<br>40-65yrs, duration of DM $\geq$ 12<br>months<br><u>no</u> chest pain on effort,<br>possible previous myocardial<br>infarction and intermittent<br>claudication, cerebro-<br>vascular incidents, arthritis,<br>retinopathy                             | n=158<br>gender:100 % females<br>age (yrs): 54-55<br>HbA1c (%): 9.35                                                                                                                                      | <u>IG (n=80):</u><br>education+ incremental<br>daily home exercise, use<br>of daily physical activity<br>records+6 fortnightly<br>supervised aerobic<br>exercise classes<br>vs.<br><u>CG(n=77):</u><br>education+ relaxation<br>exercise<br><u>Duration:</u> 12wks | <u>Primary:</u> HbA1c, BMI<br><u>Secondary:</u> walking<br>distance (6 min walk)<br><br>Change over 3 months:<br><u>HbA1c (%):</u><br>no difference: 8.99 $\pm$ 2.59 vs. 8.26 $\pm$ 1.97                                                                                                                                                                                                                                |
| <b>Yan 2014</b>                                | Mozambiqu<br>e,                                      | DM2, male, age 40-70 yrs,<br>diagnosis for $\geq$ 12 months                                                                                                                                                                                                                        | n=41<br>100% male                                                                                                                                                                                         | <u>IG (n=31):</u><br>low or vigorous intensity                                                                                                                                                                                                                     | plasma glucose, HbA1c<br><br>Change over 3 months:<br><u>HbA1c (%):</u>                                                                                                                                                                                                                                                                                                                                                 |

| Study name                        | Setting                 | Population                                                                                                                                                          | Intervention vs. Control                                                                                                | Outcomes                                                                                                                                                                                                                              | Results                                                                                                                                                                                                                                                                                                                                                                      |
|-----------------------------------|-------------------------|---------------------------------------------------------------------------------------------------------------------------------------------------------------------|-------------------------------------------------------------------------------------------------------------------------|---------------------------------------------------------------------------------------------------------------------------------------------------------------------------------------------------------------------------------------|------------------------------------------------------------------------------------------------------------------------------------------------------------------------------------------------------------------------------------------------------------------------------------------------------------------------------------------------------------------------------|
| registration number               | Place, setting and time | Inclusion / Exclusion criteria                                                                                                                                      | Description with duration                                                                                               | Primary and secondary                                                                                                                                                                                                                 | Longest follow-up period with intervention effects (IG vs. CG) with SD, 95%-CI or p value                                                                                                                                                                                                                                                                                    |
| RCT                               | urban                   | no known diseases other than DM2 and hypertension, no diagnosed cardiovascular diseases                                                                             | age(yrs): 54±2.5<br>HbA1c: 8.6±0.7<br>plasma glucose (mmol/l): 9.65±1.2<br>BMI ( kg/m <sup>2</sup> ): 27.1 ± 1.0        | exercise 3-5 times/week vs.<br><u>CG(n=10):</u><br>walked 1 hour per day as part of their daily lifestyle<br><u>Duration:12 wks</u>                                                                                                   | reduction in both groups with no differences between groups: 7.7±0.4 vs. 7.7±0.8<br><u>Plasma glucose (mmol/l):</u><br>9.6 ± 0.7 vs. 11.1 ± 1.3                                                                                                                                                                                                                              |
| <b>Pharmacological strategies</b> |                         |                                                                                                                                                                     |                                                                                                                         |                                                                                                                                                                                                                                       |                                                                                                                                                                                                                                                                                                                                                                              |
| <b>Distiller 2014</b>             | South Africa            | DM2 for ≥ 1 year with total insulin requirement of >200 U/d for ≥ 3 months, BMI > 30 kg/m <sup>2</sup> , HbA1c> 7,5 %, on long-term metformin therapy (1.7–2.5 g/d) | n=28<br>50% female<br>age (yrs): 51.7 (36-71)<br>HbA1c (%): 8.95 (7.6-11.3)<br>BMI (kg/m <sup>2</sup> ): 40.8 (31.2-47) | <u>IG (n=14):</u><br>regular Insulin (500 U/ml) + metformin + exenatide (5 µg orally twice a day for 1 month and titrated to 10 µg)<br>vs.<br><u>CG (n=14):</u><br>regular Insulin (500 U/ml) +metformin<br><u>Duration: 6 months</u> | <u>Primary:</u> HbA1c<br><u>Secondary:</u> Body weight, insulin dose, hypoglycemia<br>Change to 6 months:<br><u>HbA1c (%):</u><br>Significant improvement in both groups<br>8.7→7.7(p=0.002) vs. 9.2→7.5 (p=0.0001)<br>With no difference between groups (MD: 0.28; p=0.80)<br><u>Complications:</u><br>Mild hypoglycaemia: 5 vs. 2 persons with 20 vs. 5 events (p ≤ 0.001) |
| <b>EI-Haggar 2015</b>             | Egypt, urban            | DM2, age: 45-55 yrs, obese (BMI≥30 kg/m <sup>2</sup> ), with duration 5-10 yrs, treated with glimepiride alone                                                      | n=48<br>79 % female<br>age (yrs): 50.1±4.6<br>HbA1c (%): 7.83±0.87<br>fasting glucose (mg/dl): 193±50                   | <u>IG1 (n=16):</u><br>glimepiride (3 mg/d) + 2 (1 mg twice/d)<br>vs.<br><u>IG2 (n=16):</u><br>glimepiride (3 mg/d) +                                                                                                                  | <u>not specified:</u><br>glycemic markers, metabolic markers, adiponectin, interleukin-6, leukotriene B4, mast cell tryptase, lipid panel,<br>Changes over 12 weeks:<br><u>HbA1c (%):</u><br>• Highest benefit for IG1: 7.1±0.86 vs. 8.2±0.82 vs. 8.7±0.93 (p< 0.05)<br><u>fasting glucose (mg/dl):</u><br>• Highest benefit for IG1: 199±38 vs.                             |

| Study name<br>registration<br>number<br>Design | Setting<br>Place,<br>setting and<br>time                                  | Population<br>Inclusion / Exclusion criteria                                                                                                                                                                                                                                                                                                                                                                                                                         | Characteristics                                                                                                                                     | Intervention vs. Control<br>Description with duration                                                                                                                                                                                                  | Outcomes<br>Primary and secondary                                                                                | Results<br>Longest follow-up period with<br>intervention effects (IG vs. CG) with<br>SD, 95%-CI or p value                                                                                                                                                                                                                                                                                                       |
|------------------------------------------------|---------------------------------------------------------------------------|----------------------------------------------------------------------------------------------------------------------------------------------------------------------------------------------------------------------------------------------------------------------------------------------------------------------------------------------------------------------------------------------------------------------------------------------------------------------|-----------------------------------------------------------------------------------------------------------------------------------------------------|--------------------------------------------------------------------------------------------------------------------------------------------------------------------------------------------------------------------------------------------------------|------------------------------------------------------------------------------------------------------------------|------------------------------------------------------------------------------------------------------------------------------------------------------------------------------------------------------------------------------------------------------------------------------------------------------------------------------------------------------------------------------------------------------------------|
|                                                |                                                                           | severe hepatic or renal<br>disease, epilepsy<br>pregnant/lactating females                                                                                                                                                                                                                                                                                                                                                                                           | BMI (kg/m <sup>2</sup> ):<br>37.6±4.6<br>duration of diabetes<br>(yrs): 7.7 ±2.6                                                                    | ketotifen (1 mg once/d)<br>vs.<br>CG (n=16):<br>gliimepiride (3 mg/d)<br>alone<br>Duration: 12 weeks                                                                                                                                                   | BMI                                                                                                              | 207.7± 47.6 (p< 0.05)                                                                                                                                                                                                                                                                                                                                                                                            |
| <b>Malek 2015</b><br><br>RCT                   | Egypt,<br>Algeria,<br>Tunisia,<br>South Africa<br><br>03/2010-<br>05/2012 | DM2, age ≥ 18 yrs, currently<br>treated with suboptimal dose<br>of oral anti-diabetic drugs;<br>HbA1c 7-11 % (under<br>metformin-monotherapy)<br>and ≤ 10 % (under<br>combination therapy),<br>BMI≤40 kg/m <sup>2</sup><br><br>no allergies or<br>contraindications to the<br>product, pregnant or<br>breastfeeding, impaired<br>hepatic or renal function,<br>cardiovascular history,<br>uncontrolled hypertension,<br>proliferative retinopathy,<br>macular oedema | n=403<br>age (yrs): 52.8±9.6<br>59.8 % female<br>HbA1c (%): 8.65<br>BMI (kg/m <sup>2</sup> ):<br>29.7±4.5<br>duration of diabetes<br>(yrs): 7.5±5.1 | Stepwise individual<br>insulin intensification of<br>IG (n=200):<br>basal-bolus insulin<br>analogues (insulin<br>detemir +Insulin aspart)<br>vs.<br>CG (n=203):<br>thrice daily biphasic<br>insulin aspart depending<br>on HbA1c-values over<br>50 wks | <u>Primary:</u><br>HbA1c<br><u>Secondary:</u><br>patients achieving HbA1c<br>< 7.0 %, prandial plasma<br>glucose | Change over 50 weeks:<br><u>HbA1c (%)</u> :<br>Non-inferiority: 7.4 vs. 7.3; MD 0.1 (-<br>0.1 to 0.3 (full-analysis set), MD 0.2 (-<br>0.1 to 0.4 (per protocol)<br>40.3% and 44.9% achieved<br>HbA1c<7.0%<br><u>Hypoglycaemia (events/patient year)</u> :<br>9.4 vs. 9.8<br><u>Serious adverse events</u> :<br>6.5 vs. 3.4 % with 1 treatment-related<br>SAE in CG<br><u>Adverse events</u> :<br>58.5 vs. 63.1% |
| <b>Strategies on food supplementation</b>      |                                                                           |                                                                                                                                                                                                                                                                                                                                                                                                                                                                      |                                                                                                                                                     |                                                                                                                                                                                                                                                        |                                                                                                                  |                                                                                                                                                                                                                                                                                                                                                                                                                  |

| Study name registration number Design | Setting Place, setting and time                 | Population Inclusion / Exclusion criteria                                                                                                                                                                                                                                                                                                                                                                                                                                                   | Characteristics                                                                                                                                                                                                            | Intervention vs. Control Description with duration                                                                                                                                                                                                                                                                                                                                            | Outcomes Primary and secondary                                                                                                                                                                                                       | Results Longest follow-up period with intervention effects (IG vs. CG) with SD, 95%-CI or p value                                                                                                                                                                                                                                                                                                           |
|---------------------------------------|-------------------------------------------------|---------------------------------------------------------------------------------------------------------------------------------------------------------------------------------------------------------------------------------------------------------------------------------------------------------------------------------------------------------------------------------------------------------------------------------------------------------------------------------------------|----------------------------------------------------------------------------------------------------------------------------------------------------------------------------------------------------------------------------|-----------------------------------------------------------------------------------------------------------------------------------------------------------------------------------------------------------------------------------------------------------------------------------------------------------------------------------------------------------------------------------------------|--------------------------------------------------------------------------------------------------------------------------------------------------------------------------------------------------------------------------------------|-------------------------------------------------------------------------------------------------------------------------------------------------------------------------------------------------------------------------------------------------------------------------------------------------------------------------------------------------------------------------------------------------------------|
| <b>Ali 2019</b><br>RCT                | Egypt Urban, tertiary care<br>09/2017 – 04/2018 | DM2, oral antidiabetic agents with no change of type and dosage of antidiabetic agents in the past 3 months, ≥ 30 years<br><br>insulin-dependence, pregnancy, lactation, use of Ca, multivitamins, Vitamin D supplements, use of drugs that affect Vitamin D status, dietary Ca intake > 1500 mg/d, hypo- or hyperthyroidism, smoking, use of antiepileptic drugs, sarcoidosis, tuberculosis, potentially terminal illness, inflammatory bowel disease, liver or kidney disease, malignancy | n=85<br>age (yrs): 54.6 ±2.8<br>68 % females<br>BMI (kg/m <sup>2</sup> ): 28.6±3.3<br>Diabetic duration (yrs): 4.4±2.1<br>fasting glucose (mg/dL): 168±54.4<br>fasting serum insulin (μU/mL): 18.1±8.3<br>HbA1c(%):8.8±1.8 | oral antidiabetic agents as usual +<br><u>IG 1 (n=22):</u><br>continuous oral Vitamin D3 (4000 IU/ d)<br>vs.<br><u>IG 2 (n=22):</u><br>intermittent regimen of Vitamin D3 (50 000 IU/ week)<br>vs.<br><u>IG 3 (n=21):</u><br>single IM injection of 300 000 IU of Vitamin D3 at the start of the study<br>vs.<br><u>CG (n=20):</u> only oral antidiabetic agents<br><u>Duration:</u> 3 months | Not specified: serum creatinine, blood urea nitrogen, total and ionized Ca, serum phosphorus, fasting glucose, fasting serum insulin, 25(OH)D3 levels, HbA1c                                                                         | After 3 months:<br><u>fasting glucose</u> (mg/dL): higher decrease in IG1 and IG2: -20.9±18.1 vs. -23.0±37.9 vs. -3.5±6.9 vs. 1.0±5.6 (p<0.001)<br><u>fasting serum insulin</u> (μU/mL): higher decrease in IG1 and IG2: -4.44±5.2 vs.-5.88±4.6 vs. -1.55±9.4 vs. 0.10±1.0 (p< 0.001)<br><u>HbA1c (%)</u> :higher decrease in IG1 and IG2: -0.81±0.77 vs. -0.82±0.87 vs. -0.34±1.47 vs. 0.05±0.08 (p<0.001) |
| <b>Anderson 2001</b><br>RCT           | Tunesia, urban                                  | DM2 ≥ 5y, age< 65 yrs, fasting glucose > 8 mmol/l and HbA1C > 7.5 %<br><br>no pregnant or lactating women, receiving trace element supplements in past 3 months, with gastric or diuretic treatment, acute renal, acute infection or recent surgery                                                                                                                                                                                                                                         | n=110<br>age (yrs): 53.2 ±16.8<br>BMI (kg/m <sup>2</sup> ): 29.1±1.0<br>HbA1c (%):8.82±3.25<br>fasting glucose (mmol/l): 11.45±0.83<br>duration of diabetes (months): 73.6±66                                              | <u>IG 1 (n=27):</u><br>Zinc (30 mg/d)<br>vs.<br><u>IG 2 (n=27):</u><br>Chromium (400 μg/d)<br>vs.<br><u>IG 3 (n=27):</u><br>Zinc (30 mg /d) + Chromium (400 μg /d)<br>vs.<br><u>CG (n=29):</u><br>placebo<br><u>Duration:</u> 6 months                                                                                                                                                        | Not specified: HbA1C, fasting glucose plasma concentrations of zinc, copper, selenium, urinary chromium and zinc, Plasma thiobarbituric acid reactive substances, copper-zinc-superoxid dismutase, selenium - glutathione peroxidase | Change over 6 months:<br><u>HbA1c (%)</u> : 7.7±1.6 vs. 7.4±1.4 vs. 8.1±1.6<br>CG: not reported                                                                                                                                                                                                                                                                                                             |
| <b>Anyanwu 2016</b>                   | Nigeria, urban                                  | DM2, age 35-65 yrs on oral antidiabetics with vitamin D                                                                                                                                                                                                                                                                                                                                                                                                                                     | n=42<br>57.6 % female                                                                                                                                                                                                      | <u>IG (n=21):</u><br>Vitamin D3 supplements                                                                                                                                                                                                                                                                                                                                                   | <u>Primary:</u> HbA1c<br><u>Other:</u> fasting glucose,                                                                                                                                                                              | Changes over 12 wks:<br><u>HbA1c (%)</u> :                                                                                                                                                                                                                                                                                                                                                                  |

| Study name<br>registration<br>number<br>Design | Setting<br>Place,<br>setting and<br>time                   | Population<br>Inclusion / Exclusion criteria                                                                                                                                                                                                                                                                                                                                                                                                                                                                                                                                                                                    | Characteristics                                                                                                                                                                             | Intervention vs. Control<br>Description with duration                                                                                                                                          | Outcomes<br>Primary and secondary                                                            | Results<br>Longest follow-up period with<br>intervention effects (IG vs. CG) with<br>SD, 95%-CI or p value                                                                                                                                                                                                                                                                                                  |
|------------------------------------------------|------------------------------------------------------------|---------------------------------------------------------------------------------------------------------------------------------------------------------------------------------------------------------------------------------------------------------------------------------------------------------------------------------------------------------------------------------------------------------------------------------------------------------------------------------------------------------------------------------------------------------------------------------------------------------------------------------|---------------------------------------------------------------------------------------------------------------------------------------------------------------------------------------------|------------------------------------------------------------------------------------------------------------------------------------------------------------------------------------------------|----------------------------------------------------------------------------------------------|-------------------------------------------------------------------------------------------------------------------------------------------------------------------------------------------------------------------------------------------------------------------------------------------------------------------------------------------------------------------------------------------------------------|
| RCT                                            |                                                            | deficiency and poor glycemic control (HbA1c > 6.5 %)                                                                                                                                                                                                                                                                                                                                                                                                                                                                                                                                                                            | age (yrs): 51.8±2.05<br>HbA1c (%): 7.88<br>fasting glucose (mg/dl): 152.8±56.5                                                                                                              | (3000 IU/d)<br>vs.<br><u>CG(n=21):</u><br>placebo<br><u>Duration:</u> 12 weeks                                                                                                                 | levels of serum Vitamin D, calcium, albumin, phosphate, creatinine, and alanine transaminase | <ul style="list-style-type: none"> <li>MD (IG vs. CG): -0.66 (-0.161 to 0.29) vs 0.38 (-0.08 to 0.84);</li> <li>MD: -1.04 (-2.09 to 0.01)</li> <li>change from poor glycemic control (HbA1c&gt;6.5 %) to normal HbA1c (%): benefit for IF: 33.3 vs. -9.1 (p&lt;0.05)</li> </ul> <u>fasting glucose (mg/dl):</u><br>137.2±33.6 vs. 154±67.5<br><u>patient adherence</u> (tablet counts, %):<br>62.2 vs. 59.9 |
| <b>El Gayar 2019</b><br><br>RCT                | Egypt,<br>urban,<br>outpatients<br><br>01/2017-<br>01/2018 | DM2 for < 6 months, 30-60 yrs, HbA1c level < 9%, BMI≥30 kg/m <sup>2</sup><br><br>no insulin therapy, any injectable or oral antidiabetic medication other than metformin, no smoking, consumption of alcohol or narcotic drugs, no acute illnesses at the baseline or during the study, no pregnancy or lactation, autoimmune disorder, cardiac or renal diseases, thyroid, chronic inflammatory diseases, peptic ulcer, regular consumption of ginger or other herbal drugs, hypersensitivity to ginger, consumption of lipid lowering drugs or oral contraceptive pills or any supplements 2 months before starting the study | n=80<br>49 % female<br>age (yrs): 46.2 ± 9.1<br>HbA1c (%): 8.04±0.5<br>fasting glucose (mg/dl): 176.9±18.3<br>Fasting serum insulin (mIU/L): 19.3±3.3<br>BMI (kg/m <sup>2</sup> ): 32.3±1.4 | diet, physical activity, and metformin<br><u>IG (n=40):</u><br>ginger powder supplementation (600 mg/capsule, 3 capsules/d)<br>vs.<br><u>CG (n=40):</u><br>Placebo<br><u>Duration:</u> 8 weeks | <u>Not specified:</u> glycemic status, lipid profile and beta-cell function                  | After 8 wks:<br><u>HbA1c (%)</u> :<br>decrease in both groups to 6.94±0.38 vs. 7.26±0.45<br><u>Fasting serum insulin</u> (mIU/L):<br>decrease in both groups to 12.86±2.59 vs. 13.21±2.08<br>fasting glucose (mg/dl):<br>decrease in both groups to 120.88±9.06 vs. 151.70±13.23                                                                                                                            |

| Study name<br>registration<br>number<br>Design | Setting<br>Place,<br>setting and<br>time                     | Population<br>Inclusion / Exclusion criteria                                                                                                                                                                                                                                                                                                                                                                                                                                                                                                                       | Characteristics                                                                                                                                         | Intervention vs. Control<br>Description with duration                                                                                                                                                                    | Outcomes<br>Primary and secondary                                                                                                                                                                                                                   | Results<br>Longest follow-up period with<br>intervention effects (IG vs. CG) with<br>SD, 95%-CI or p value                                                                                                          |
|------------------------------------------------|--------------------------------------------------------------|--------------------------------------------------------------------------------------------------------------------------------------------------------------------------------------------------------------------------------------------------------------------------------------------------------------------------------------------------------------------------------------------------------------------------------------------------------------------------------------------------------------------------------------------------------------------|---------------------------------------------------------------------------------------------------------------------------------------------------------|--------------------------------------------------------------------------------------------------------------------------------------------------------------------------------------------------------------------------|-----------------------------------------------------------------------------------------------------------------------------------------------------------------------------------------------------------------------------------------------------|---------------------------------------------------------------------------------------------------------------------------------------------------------------------------------------------------------------------|
| <b>EI-Sheikh<br/>2019</b><br><br>RCT           | Egypt,<br>urban                                              | DM2 on glimepiride alone,<br>age ≥30 yrs<br><br>no insulin sensitizers,<br>steroids, NSAIDs, warfarin or<br>lipid lowering medications,<br>thyroid hormones, valproic<br>acid or suffered from: acute<br>or chronic inflammatory<br>diseases, end-stage renal<br>disease undergoing dialysis,<br>hypothyroidism epilepsy,<br>pregnant and breast-feeding<br>women                                                                                                                                                                                                  | n= 72<br>67 % female<br>age (yrs): 50.6±8.7<br>HbA1c (%):9.76±1<br><br>fasting glucose<br>(mg/dl):194.84±20.8<br>BMI (kg/m <sup>2</sup> ):<br>34.4±5.45 | <u>IG (n=38):</u><br>glimepiride 2 mg twice<br>daily + L-carnitine 1 gm<br>twice daily<br>vs.<br><u>CG (n=34):</u><br>glimepiride dose 2 mg<br>twice daily<br><u>Duration:</u> 6 months                                  | HbA1c, fasting glucose,<br>PPBG, fasting insulin,<br>extracellular part of<br>insulin regulated<br>aminopeptidase, tumor<br>necrosis factor-alpha,<br>visfatin and lipid panel,<br>BMI and homeostasis<br>model assessment of<br>insulin resistance | Change over 6 months:<br><u>HbA1c (%)</u> :<br>Benefit for IG: 7.41±0.5 vs. 9.5±0.78<br>(p<0.001)<br><u>fasting glucose (mg/dl)</u> :<br>Benefit for IG: 179.6±9.3 vs.<br>192.41±27.4 (p=0.018)                     |
| <b>Matter 2020</b><br>NCT03851055<br><br>RCT   | Egypt,<br>urban,<br>outpatients<br><br>08/2017 to<br>08/2018 | DM, treated with insulin, 10<br>to 18 yrs, transfusion<br>dependent beta-thalassemia<br>major<br><br>no other hemoglobinopathies<br>(e.g. a-thalassemia or sickle<br>thalassemia, disorders that<br>may affect glucose<br>homeostasis other than b-<br>TM, autoimmune diseases,<br>collagen diseases, hypo- or<br>hyperthyroidism, infections,<br>or tumours, or those who<br>were taking any vitamins or<br>food supplements < 1 month<br>before the study and<br>participating in a previous<br>investigational drug<br>study within 3 mo preceding<br>screening | n=80<br>52.5% females<br>age (yrs): 16.3±1.4<br>(range 12-18)<br>fasting glucose<br>(mg/dL): 144.5±22.4                                                 | diet schedule with<br>optimal macronutrient<br>distribution and<br>pharmacologic treatment<br><br><u>IG (n=40):</u><br>zinc gluconate<br>(2x20 mg/d)<br>vs.<br><u>CG (n=40):</u><br>placebo<br><u>Duration:</u> 3 months | <u>Primary:</u> fasting glucose<br><u>Secondary:</u> fructosamine,<br>fasting C-peptide, and<br>HOMA-IR<br><u>safety:</u> any AEs (e.g.<br>nausea, vomiting,<br>abdominal pain, diarrhea,<br>constipation, and<br>reduction of appetite)            | After 12 wks:<br>fasting glucose ( <u>mg/dL</u> ):<br>higher decrease with IG to 116.9±4.6<br>vs. 144.5±22.9 (p<0.001)<br><u>HbA1c (%)</u> :<br>higher in IG (no results reported)<br>no side effects were reported |
| <b>Moustafa</b>                                | Egypt,                                                       | DM2, newly diagnosed                                                                                                                                                                                                                                                                                                                                                                                                                                                                                                                                               | n=62                                                                                                                                                    | <u>IG (n=29, 21 analysed):</u>                                                                                                                                                                                           | Glycemic control,                                                                                                                                                                                                                                   | After 3 months:                                                                                                                                                                                                     |

| Study name<br>registration<br>number<br>Design | Setting<br>Place,<br>setting and<br>time                           | Population<br>Inclusion / Exclusion criteria                                                                                                                                                                                                                                                                           | Characteristics                                                                                                                                                                                                | Intervention vs. Control<br>Description with duration                                                                                                                                                                                 | Outcomes<br>Primary and secondary                                                                                                                           | Results<br>Longest follow-up period with<br>intervention effects (IG vs. CG) with<br>SD, 95%-CI or p value                                                                                                                                                                                                                                                                                                                                                                                                                                                                                                                                                       |
|------------------------------------------------|--------------------------------------------------------------------|------------------------------------------------------------------------------------------------------------------------------------------------------------------------------------------------------------------------------------------------------------------------------------------------------------------------|----------------------------------------------------------------------------------------------------------------------------------------------------------------------------------------------------------------|---------------------------------------------------------------------------------------------------------------------------------------------------------------------------------------------------------------------------------------|-------------------------------------------------------------------------------------------------------------------------------------------------------------|------------------------------------------------------------------------------------------------------------------------------------------------------------------------------------------------------------------------------------------------------------------------------------------------------------------------------------------------------------------------------------------------------------------------------------------------------------------------------------------------------------------------------------------------------------------------------------------------------------------------------------------------------------------|
| <b>2019</b><br><br>RCT                         | urban,<br>outpatients<br><br>recruitment<br>02/2016-<br>03/2018    | (within a time duration ≤6<br>months), 18–60 yrs<br><br>other antidiabetic<br>medications, pregnant and<br>lactating women, major<br>organ dysfunction (hepatic<br>failure, active hepatitis, liver<br>cirrhosis or renal<br>complications), changed their<br>standard medications during<br>the 12 weeks of the study | 72% females<br>HbA1c(%): 7.51±1.4<br>fasting glucose<br>(mg/dl): 154.4±51.6<br>BMI(kg/m <sup>2</sup> ): 33.9±6.1<br>family history of DM<br>(%): 78.5<br>retinopathy/altered<br>vision (%): 53<br>GDM (%): 9.2 | nigella sativa oil capsules<br>(3x 450 mg/d)<br>vs.<br><u>CG (n=33, 23 analysed):</u><br>metformin (2000 mg/d)<br><u>Duration:</u> 3 months                                                                                           | oxidative stress markers,<br>biochemical parameters,<br>weight/BMI/waist<br>circumference, total<br>antioxidant capacity TAC                                | <u>HbA1c (%)</u> :<br>no difference: 7.01±0.83 vs. 6.55±0.72<br><u>fasting glucose (mg/dl)</u> :<br>no difference: 119.8±23.7 vs.<br>120.7±25.4<br><u>Complications</u> :<br>no differences in occurrence of chills,<br>sweating, tachycardia, lethargy/<br>weakness, polydipsia, polyuria, dry<br>skin, polyphagia, blurred vision, foot<br>problems, or tingling/numbness<br>foot problems lower in IG: 4.8% vs.<br>33.3%, (p = 0.025).                                                                                                                                                                                                                        |
| <b>Ragheb 2020</b><br>NCT03437902<br><br>RCT   | Egypt,<br>urban,<br>outpatients<br>care<br><br>02/2019-<br>05/2018 | DM2, receiving standard oral<br>hypoglycemic agents,<br>≥ 35 yrs,<br><br>no history of overt vascular<br>disease, renal or hepatic<br>failure or antioxidant<br>supplementation or insulin<br>therapy, no change of oral<br>hypoglycemic drugs                                                                         | n=70<br>age (yrs): 54.9±8.4<br>70 % females<br>BMI (kg/m <sup>2</sup> ): 32.5±5.7<br>HbA1c(%): 8.50±1.86<br>fasting glucose<br>(mg/dl): 142.8±52.6                                                             | <u>IG2 (n=20):</u><br>Rutin (60) + vitamin C<br>(160 mg) 3x daily vs.<br><u>IG1 (n=20):</u><br>Vitamin C (500 mg) 1x<br>daily<br>vs.<br><u>CG (n=13):</u><br>only usual<br>oral antidiabetic<br>treatment<br><u>Duration:</u> 8 weeks | <u>Primary:</u> HbA1c,<br>oxidative stress marker,<br>antioxidant capacity,<br>insulin resistance, lipid<br>profile<br><u>Secondary:</u><br>Quality of life | After 2 months:<br><u>HbA1c (%)</u> :<br>no difference 7.494 ± 1.72 vs. 8.504 ±<br>2.059 vs. 8.504 ± 2.059 (p=0.1882)<br><u>fasting glucose (mg/dl)</u> :<br>lower in IG2 and CG: 111.3 (IQR 93.3-<br>135.2) vs. 144 (114.8-201) vs. 113.3<br>(94-152.2) (p=0.017)<br><u>Quality of life (SF 36)</u> :<br>• Benefit of physical functioning and<br>energy domains in IG2 vs. CG<br>(p=0.0049, p=0.0253).<br>• Benefit of role limitation to physical<br>health and emotional improved in<br>IG1 vs. CG (p=0.0267, p=0.0280)<br>• no difference between groups in<br>the other domains (emotional well-<br>being, social functioning, pain and<br>general health) |



1  
2  
3  
4  
5  
6  
7  
8  
9  
10  
11  
12  
13  
14  
15  
16  
17  
18  
19  
20  
21  
22  
23  
24  
25  
26  
27  
28  
29  
30  
31  
32  
33  
34  
35  
36  
37  
38  
39  
40  
41  
42  
43  
44  
45  
46

| Study name<br>registration<br>number<br>Design | Setting<br>Place,<br>setting and<br>time             | Inclusion / Exclusion criteria                                                                                                                                                                                                                                                                                                                                            | Population<br>Characteristics                                                                                                                                                                                                                                          | Intervention vs. Control<br>Description with duration                                                                                                                                                                                                                                           | Outcomes<br>Primary and secondary                                                                                                                                                                                                 | Results<br>Longest follow-up period with<br>intervention effects (IG vs. CG) with<br>SD, 95%-CI or p value                                                                                                                                                                                   |
|------------------------------------------------|------------------------------------------------------|---------------------------------------------------------------------------------------------------------------------------------------------------------------------------------------------------------------------------------------------------------------------------------------------------------------------------------------------------------------------------|------------------------------------------------------------------------------------------------------------------------------------------------------------------------------------------------------------------------------------------------------------------------|-------------------------------------------------------------------------------------------------------------------------------------------------------------------------------------------------------------------------------------------------------------------------------------------------|-----------------------------------------------------------------------------------------------------------------------------------------------------------------------------------------------------------------------------------|----------------------------------------------------------------------------------------------------------------------------------------------------------------------------------------------------------------------------------------------------------------------------------------------|
| <b>Rashad 2017</b><br><br>RCT                  | Egypt,<br>urban                                      | DM2, 50-62 yrs<br><br>no insulin medication,<br>allergies, recent thromboses<br>or uncontrollable<br>hypertension                                                                                                                                                                                                                                                         | n=34<br>43.3 % female<br>age (yrs): 55.5±6.15<br>HbA1c (%):6.75±1.2<br>fasting glucose<br>(mmol/l): 8.5±1.4<br>postprandial plasma<br>glucose(mmol/l):<br>15.6±3.3<br>BMI (kg/m <sup>2</sup> ):28.55±4<br>type of diabetes<br>duration of diabetes<br>(yrs): 6.1 ± 2.2 | <u>IG (n=17):</u><br>Balanites aegyptiaca<br>extract (400 mg))<br>vs.<br><u>CG: (n=17)</u><br>placebo capsules (potato<br>maltodextrin)<br><u>Duration: 8 wks</u>                                                                                                                               | glycemic markers, lipid<br>profile, FPG                                                                                                                                                                                           | Change over 8 wks:<br><u>2h postprandial plasma glucose:</u><br>benefit for IG :26.88% decrease vs. CG<br>2.6% increase<br><u>FPG (mmol/l):</u><br>benefit for IG: 7.8 ± 0.9 vs. CG: 8.5 ±<br>1.1                                                                                            |
| <b>Somanah 2012</b><br>NCT01248143<br><br>RCT  | Mauritius,<br>urban/rural<br><br>11/2010-<br>03/2011 | newly diagnosed DM, age 25–<br>60 yrs fasting glucose range:<br>5.1–5.9 mmol/L<br><br>no secondary complications,<br>non-smoker or stopped for ><br>6 months , alcoholic<br>consumption < 2 standard<br>drinks/day, post-menopausal<br>women without hormone<br>replacement treatment, no<br>glucose-lowering,<br>cholesterol-lowering or anti-<br>hypertension treatment | n=127<br>47% female<br>age (yrs): range 25–60<br>HbA1c (%): 5.99±0.4<br>fasting glucose<br>(mg/dL): 93.2±8.0<br>BMI (kg/m <sup>2</sup> ): 26.6 ±<br>3.7                                                                                                                | <u>IG (n=44):</u><br>supplementation of a<br>fermented papaya<br>preparation (6g/d twice<br>daily, over 12 wks),<br>followed by a 2 week<br>wash out period with the<br>same amount of water<br>vs.<br><u>CG (n=56):</u> consumed an<br>equivalent amount of<br>water<br><u>Duration: 14wks</u> | HbA1C fasting glucose,<br>Lipid profile, diet score,<br>blood pressure, alanine<br>aminotransferase;<br>aspartate<br>aminotransferase,<br>Ferritin, c-reactive<br>protein, uric acid,<br>microalbumin/urinary<br>creatinine ratio | After 14 wks:<br><u>HbA1c (%):</u><br>no difference (p=0.448)<br>fasting glucose ( <u>mg/dL</u> ):<br><ul style="list-style-type: none"> <li>remained relatively unchanged in<br/>boths genders:</li> <li>males: 96.2±17.0 vs. 87.6±11.7</li> <li>females: 95.6±15.8 vs. 94.3±5.0</li> </ul> |

**Strategies on treatment of DM related complications**



| Study name<br>registration<br>number<br>Design | Setting<br>Place,<br>setting and<br>time | Population<br>Inclusion / Exclusion criteria                                                                                                                                                                                                                                                                                                                                         | Population<br>Characteristics                                                                        | Intervention vs. Control<br>Description with duration                                                                                                                                                                                                               | Outcomes<br>Primary and secondary                                                                             | Results<br>Longest follow-up period with<br>intervention effects (IG vs. CG) with<br>SD, 95%-CI or p value                                                                                                                               |
|------------------------------------------------|------------------------------------------|--------------------------------------------------------------------------------------------------------------------------------------------------------------------------------------------------------------------------------------------------------------------------------------------------------------------------------------------------------------------------------------|------------------------------------------------------------------------------------------------------|---------------------------------------------------------------------------------------------------------------------------------------------------------------------------------------------------------------------------------------------------------------------|---------------------------------------------------------------------------------------------------------------|------------------------------------------------------------------------------------------------------------------------------------------------------------------------------------------------------------------------------------------|
|                                                |                                          | antibiotics, non-steroidal or anti-inflammatory drugs within the last 3 months, periodontal therapy ≤ 1 year, retinopathy grade 3/4, pregnancy, no contraceptive drugs                                                                                                                                                                                                               | (yrs): 8.1 ± 3.9<br>hypertension: 4.5%<br>neuropathy: 1.5%<br>retinopathy: 0.5%<br>nephropathy: 0%   |                                                                                                                                                                                                                                                                     |                                                                                                               |                                                                                                                                                                                                                                          |
| <b>Ghoneim 2013</b><br><br>RCT                 | Egypt,<br><br>03/2010-<br>03/2012        | DM, duration ≥ 15 yrs, bilateral diabetic macular edema (≥ 6 months)<br><br>no prior treatment with intravitreal corticosteroids, peribulbar steroid injection within ≤ 6 months, pars plana vitrectomy, history of glaucoma or steroid induced IOP elevation, ischemic maculopathy, foveal tracted, IOP≥ 23 mmHg                                                                    | n=19 (38 eyes)<br>89.5 % female<br>age (yrs): 52.3±11.4                                              | <u>IG (n=19):</u><br>one eye with 8 mg triamcinolone acetonide vs.<br><u>CG (n=19):</u><br>other eye with 4 mg of triamcinolone acetonide<br><br><u>Duration:</u> 6 months                                                                                          | <u>Primary:</u> Visual acuity<br><u>Others:</u> Intraocular pressure (IOP), IOP lowering drugs, complications | after 6 months:<br><u>Complications:</u><br>• no eyes with retinal detachment, vitreous haemorrhage, intraocular reaction or endophthalmitis.<br>• one eye in IG developed posterior subcapsular cataract.                               |
| <b>Nteleki 2015</b><br><br>RCT                 | South Africa,<br>urban                   | DM2 with neuropathic or mixed (venous and arterial) ulcers; lower extremity ulcer; stable or worsening ulcer that has been present for ≥ 4 weeks<br><br>no acute cellulitis, osteomyelitis, or gangrene, renal, hepatic, hematologic, neurologic, or immune disease not related to diabetes; presence of malignant disease not in remission for > 5 years; use of oral or parenteral | n=7 with 14 lower extremity ulcers<br>85 % male<br>age (yrs): 62<br>duration of diabetes (yrs): 16.7 | standard podiatric management <u>and</u><br><u>IG1 (n=2):</u><br>phototherapy to the regional lymphatic nodes and ulcer(s)<br>vs.<br><u>IG2 (n=3):</u><br>phototherapy on the ulcer<br>vs.<br><u>CG (n=2):</u><br>placebo phototherapy<br><u>Duration:</u> 12 weeks | healing rate (area and perimeter of the ulcer)                                                                | after 3 months:<br><u>Healing:</u><br>• The rate of healing increased in all three groups,<br>• 67% of ulcers received some form of phototherapeutic intervention, 40% of those ulcers resolved completely over 8 weeks<br>no <u>AEs</u> |

| Study name<br>registration<br>number<br>Design            | Setting<br>Place,<br>setting and<br>time                 | Population<br>Inclusion / Exclusion criteria                                                                                                                       | Characteristics                                                                                                                  | Intervention vs. Control<br>Description with duration                                                                                                                                                                                                                                                                                                                   | Outcomes<br>Primary and secondary                                                                                                           | Results<br>Longest follow-up period with<br>intervention effects (IG vs. CG) with<br>SD, 95%-CI or p value                                                                                                                                                                                                                                                                                   |
|-----------------------------------------------------------|----------------------------------------------------------|--------------------------------------------------------------------------------------------------------------------------------------------------------------------|----------------------------------------------------------------------------------------------------------------------------------|-------------------------------------------------------------------------------------------------------------------------------------------------------------------------------------------------------------------------------------------------------------------------------------------------------------------------------------------------------------------------|---------------------------------------------------------------------------------------------------------------------------------------------|----------------------------------------------------------------------------------------------------------------------------------------------------------------------------------------------------------------------------------------------------------------------------------------------------------------------------------------------------------------------------------------------|
|                                                           |                                                          | corticosteroids,<br>immunosuppressive, or<br>cytotoxic agents; known<br>infection with human<br>immunodeficiency virus or<br>presence of AIDS; other leg<br>ulcers |                                                                                                                                  |                                                                                                                                                                                                                                                                                                                                                                         |                                                                                                                                             |                                                                                                                                                                                                                                                                                                                                                                                              |
| <b>Saeed 2013</b><br><br>RCT                              | Egypt,<br>urban<br><br>11/2010-<br>07/2012               | DM, intractable diffuse<br>diabetic macular edema<br>without vitreomacular<br>traction.<br>central foveal thickness $\geq 300$<br>$\mu\text{m}$                    | n= 34 (34 eyes)<br>50% females<br>age (yrs): $55.5 \pm 8.9$<br>duration of diabetes<br>(yrs): $24 \pm 5.4$                       | <u>IG (n=15):</u><br>vitrectomy with removal<br>of the posterior hyaloid,<br>at the end of the<br>procedure injection of<br>intravitreal triamcinolone<br>acetone (IVTA, 0.1 mL,<br>40 mg/mL) +bevacizumab<br>(1.25 mg) +macular grid<br>laser photocoagulation<br>vs.<br><u>CG (n=15):</u><br>same intravitreal<br>injection combination<br><u>Duration:</u> 12 months | <u>primary:</u><br>BCVA, central foveal<br>thickness                                                                                        | Changes over 12 months<br><u>Complications:</u><br>• Changes in BCVA and central foveal<br>thickness at 3, 6, and 12 ( $P < 0.01$ ),<br>better mean BCVA in IG at 12 months.<br>• Better mean <u>central foveal thickness</u> in<br>IG at 12 months.<br><u>Major adverse events:</u><br>development of cataracts (3/15 vs.<br>6/15) and elevation of intraocular<br>pressure (7/15 vs. 2/15) |
| <b>Tsobgny-<br/>Tsague 2018</b><br>NCT02745015<br><br>RCT | Cameroon,<br>urban,<br>tertiary<br>care,<br><br>12/2014- | DM2, >11teeth, severe<br>chronic periodontitis<br>according to the 2012<br>CDC-AAP classification,<br><br>no periodontal treatment,                                | n=34<br>56% female<br>age (yrs): $51.4 \pm 8.8$<br>HbA1c (%): $9.3 \pm 1.3$<br>BMI ( $\text{kg}/\text{m}^2$ ): $28.3 \pm$<br>5.4 | <u>IG (n=17):</u><br>immediate ultrasonic<br>scaling, scaling and root<br>planning +subgingival<br>10% povidone iodine<br>irrigation                                                                                                                                                                                                                                    | <u>Primary:</u> change in HbA1c<br><u>Secondary:</u> Plaque index,<br>gingival bleeding index,<br>pocket depth, clinical<br>attachment loss | Change over 3 months:<br><u>HbA1c (%):</u><br>Benefit with IG: $6.7 \pm 2.0$ % vs. $8.1 \pm$<br>$2.6$ %, MD: 2.2 ( $p=0.029$ )<br><u>adverse events:</u><br>1 /15 patient reported tongue                                                                                                                                                                                                    |

1  
2  
3  
4  
5  
6  
7  
8  
9  
10  
11  
12  
13  
14  
15  
16  
17  
18  
19  
20  
21  
22  
23  
24  
25  
26  
27  
28  
29  
30  
31  
32  
33  
34  
35  
36  
37  
38  
39  
40  
41  
42  
43  
44  
45  
46

| Study name registration number Design        | Setting Place, setting and time     | Population Inclusion / Exclusion criteria                                                                                                                                                                                                                                                           | Characteristics                                                                                                                         | Intervention vs. Control Description with duration                                                                                                                                                                                                                    | Outcomes Primary and secondary                                                                                                            | Results Longest follow-up period with intervention effects (IG vs. CG) with SD, 95%-CI or p value |
|----------------------------------------------|-------------------------------------|-----------------------------------------------------------------------------------------------------------------------------------------------------------------------------------------------------------------------------------------------------------------------------------------------------|-----------------------------------------------------------------------------------------------------------------------------------------|-----------------------------------------------------------------------------------------------------------------------------------------------------------------------------------------------------------------------------------------------------------------------|-------------------------------------------------------------------------------------------------------------------------------------------|---------------------------------------------------------------------------------------------------|
|                                              | 05/2015                             | alteration of DM treatment 6 mths prior to the study, onset of systemic diseases or an acute condition, use of immunosuppressive medications or others drugs or presence of conditions able to alter periodontitis clinical features                                                                | duration of diabetes (months): 55.5 ± 42.6 complications: neuropathy (%): 40 nephropathy (%): 7 retinopathy (%): 7 diabetic foot (%): 3 | vs. <u>CG(n=17):</u> periodontal treatment 3 months later <u>Duration: 3 months</u>                                                                                                                                                                                   |                                                                                                                                           | irritation following chlorhexidine moth rinse in IG                                               |
| <b>Yakoot 2019</b><br>NCT01531517<br><br>RCT | Egypt, urban<br><br>07/2011-07/2013 | Adult DM2 or DM1 patients, limb-threatening diabetic foot ulcerations<br><br>no life-threatening extensive gangrenous lesions that needed immediate amputations; bad general condition; shock or unstable vital signs; critically ill with severe organ/system dysfunctions or advanced malignancy. | n=119<br>gender:44.5% female<br>age (yrs): 54.7 ±8.4<br>type of diabetes:<br>• DM1: 22.9%<br>• DM2: 86.2%                               | conservative debridement of necrotic tissue and irrigation with warm normal saline and <u>IG (n=61):</u> local application of ointment composed of royal jelly and panthenol<br><br>vs. <u>CG (n=58):</u> local application of Panthenol<br><u>duration: 12months</u> | <u>primary:</u> complete healing<br><u>secondary:</u> reduction of infection in the ulcer site, al reaction that may be due to study drug | after 12 months rate of complete healing (%): Benefit for IG: 32.4% vs. 12%; p=0.034              |

ADA: American Diabetes Association; BCVA: Best-corrected visual acuity; BMI: Body mass index; CG: Control group; CI: Confidence interval; CHC: Community health centre; DBP: Diastolic blood pressure; DM: diabetes mellitus; DM1: Type 1 diabetes; DM2: type 2 diabetes; FPG: fasting plasma glucose; HbA1c: haemoglobin A1c; IG: intervention group; IQR: interquartile range; n: number of participants; NCD: Non-communicable disease; NPH: neutral protamine Hagedorn; MD: mean difference; MDa: adjusted mean difference; NCD: Non-communicable disease ;RCT: randomized controlled trial; RR: Relative risk; RRa: adjusted relative risk; SAE: Serious adverse events; SBP: Systolic blood pressure; SCl: Diabetes Self-Care Inventory; SD: Standard-deviation; SMBG: self-monitoring of blood glucose; wks: weeks; yrs: years

**Table 4: Characteristics and results of studies on patients with DM2**

## RCTs on pregnant DM patients

| Study name<br>registration<br>number<br>Design  | Setting<br>Place,<br>setting and<br>time    | Population<br>Inclusion / Exclusion criteria<br>Characteristics                                                                                                                                                                                                                                                                                                                                                                                                                                                 | Intervention vs.<br>Control<br>Description with<br>duration                                                                                                                                                                                                             | Outcomes<br>Primary and secondary                                                                                                                                                                                                                                                       | Results<br>Longest follow-up period<br>with intervention effects<br>(IG vs. CG) with SD, 95%-<br>CI or p value     | Study name<br>registration number<br>Design                                                                                                                                                                                                        |
|-------------------------------------------------|---------------------------------------------|-----------------------------------------------------------------------------------------------------------------------------------------------------------------------------------------------------------------------------------------------------------------------------------------------------------------------------------------------------------------------------------------------------------------------------------------------------------------------------------------------------------------|-------------------------------------------------------------------------------------------------------------------------------------------------------------------------------------------------------------------------------------------------------------------------|-----------------------------------------------------------------------------------------------------------------------------------------------------------------------------------------------------------------------------------------------------------------------------------------|--------------------------------------------------------------------------------------------------------------------|----------------------------------------------------------------------------------------------------------------------------------------------------------------------------------------------------------------------------------------------------|
| <b>Strategies to increase physical activity</b> |                                             |                                                                                                                                                                                                                                                                                                                                                                                                                                                                                                                 |                                                                                                                                                                                                                                                                         |                                                                                                                                                                                                                                                                                         |                                                                                                                    |                                                                                                                                                                                                                                                    |
| <b>Embaby<br/>2016</b><br><br>RCT               | Egypt,<br>urban,<br><br>07/2014-<br>02/2015 | at increased risk for GDM due<br>to obesity (BMI $\geq$ 30 kg/m <sup>2</sup> ),<br>age: $>$ 25 yrs,<br>20-24th gestational wks,<br>multigravida, physically active<br>with $\geq$ 1 of the following 3<br>characteristics: history of<br>macrosomia, abnormal<br>glucose tolerance during<br>previous pregnancy or first<br>grade relative with DM2<br><br>no hypertension, GDM,<br>medications that affects<br>insulin secretion, serious<br>pulmonary disease, cardiac,<br>renal impairment and<br>malignancy | n=40<br>100% female<br>age (yrs): 29.2 $\pm$ 3.8<br>BMI (kg/m <sup>2</sup> ):28.7 $\pm$ 1.3<br>fasting glucose<br>(mmol/l): 6.5 $\pm$ 0.9<br>fasting insulin (IU/l):<br>15.78 $\pm$ 1.58                                                                                | <u>IG:</u><br>aerobic exercise program<br>(walking on treadmill)<br>three times weekly until<br>the end of 37 wks of<br>gestation + diet control.<br>vs.<br><u>CG:</u><br>diet control with usual<br>care given by<br>obstetricians and<br>midwives.<br><u>Duration:</u> appr. 4 months | Fasting plasma glucose,<br>Insulin level                                                                           | Change to 37 <sup>th</sup> week of gestation:<br><u>FPG (mmol/l)</u><br>Benefit for IG: 4.26 $\pm$ 0.67 vs. 5.07 $\pm$ 0.54<br>(p=0.0001)<br><u>Fasting insulin (IU/l):</u><br>Benefit for IG: 10.59 $\pm$ 1.10 vs.<br>12.43 $\pm$ 1.44 (p=0.0001) |
| <b>Other non-pharmacological therapies</b>      |                                             |                                                                                                                                                                                                                                                                                                                                                                                                                                                                                                                 |                                                                                                                                                                                                                                                                         |                                                                                                                                                                                                                                                                                         |                                                                                                                    |                                                                                                                                                                                                                                                    |
| <b>EI-Shamy<br/>2018</b><br><br>RCT             | Egypt,<br>urban<br><br>12/2016-<br>05/2017  | GDM, age: 20-30 yrs,<br>gestational age: 24-26 wks,<br>BMI $\leq$ 30 kg/m <sup>2</sup> , singleton live<br>fetus<br><br>no high-risk pregnancy, bad<br>obstetric situations or<br>diseases, smoking, oral<br>sedatives                                                                                                                                                                                                                                                                                          | n=30<br>100% female<br>age (yrs): 24.2 $\pm$ 2.8<br>75 g OGTT (mg/dl):<br><ul style="list-style-type: none"> <li>fasting glucose:<br/>129.05<math>\pm</math>0.6</li> <li>2h postprandial:<br/>146<math>\pm</math>1.65</li> </ul> BMI (kg/m <sup>2</sup> ): 27 $\pm$ 1.5 | <u>IG (n=15):</u><br>acupressure + standard<br>antenatal care<br>vs.<br><u>CG (n=15):</u><br>standard antenatal care<br>only<br><u>Duration:</u> 12 weeks                                                                                                                               | Primary:<br>glycemic control,<br>requirement for insulin,<br>insulin resistance<br>Secondary:<br>neonatal outcomes | Change over 3 months:<br>75 g OGTT (mg/dl):<br>Fasting: 116.1 $\pm$ 0.1 vs. 118.2 $\pm$ 0.7<br>2h postprandial:<br>125.3 $\pm$ 1.2 vs. 127.3 $\pm$ 0.9<br>Complication (%):<br>5-min Apgar-Score < 7: 6.7 vs. 6.7 %                                |



|                                                                                                                                                                      |                                                         |                                            |                                                                                                                                                                                                                                                                                                                                                                                                     |                                                                                                                                                                                                                        |                                                                                                                                                                                                                                                                                                                                                                                                                     |                                                                                                                                                                                                                                                                                                                                                                                                                                                                                                 |                                                                                                                                                                                                                                                                                                                                                                                                                                                                                                                                                                                                                                                                                        |
|----------------------------------------------------------------------------------------------------------------------------------------------------------------------|---------------------------------------------------------|--------------------------------------------|-----------------------------------------------------------------------------------------------------------------------------------------------------------------------------------------------------------------------------------------------------------------------------------------------------------------------------------------------------------------------------------------------------|------------------------------------------------------------------------------------------------------------------------------------------------------------------------------------------------------------------------|---------------------------------------------------------------------------------------------------------------------------------------------------------------------------------------------------------------------------------------------------------------------------------------------------------------------------------------------------------------------------------------------------------------------|-------------------------------------------------------------------------------------------------------------------------------------------------------------------------------------------------------------------------------------------------------------------------------------------------------------------------------------------------------------------------------------------------------------------------------------------------------------------------------------------------|----------------------------------------------------------------------------------------------------------------------------------------------------------------------------------------------------------------------------------------------------------------------------------------------------------------------------------------------------------------------------------------------------------------------------------------------------------------------------------------------------------------------------------------------------------------------------------------------------------------------------------------------------------------------------------------|
| 1<br>2<br>3<br>4<br>5<br>6<br>7<br>8<br>9<br>10<br>11<br>12<br>13<br>14<br>15<br>16<br>17<br>18                                                                      | <b>Beyuo 2015</b><br>ACTRN126140<br>00942651<br><br>RCT | Ghana,<br>urban<br><br>01/2013-<br>12/2013 | pregnant women with DM2<br>or GDM (plasma glucose<br>≥7 mmol/l after an overnight<br>fast or plasma glucose<br>concentration ≥11.1 mmol/l 2<br>hours after a 75 g glucose<br>drink), 20-30 wks gestation,<br>age: 18-45yrs, eligible for<br>insulin therapy<br><br>no T1DM, DM2 who have<br>previously failed to achieve<br>glycemic control on<br>metformin monotherapy,<br>allergies to metformin | n= 104<br>100% female<br>age (yrs): 33.3±4.6<br>fasting glucose<br>(mmol/l): 8<br>2HPG (mmol/l): 10.5<br>BMI (kg/m <sup>2</sup> ): 3.1±6.6<br>type of diabetes:<br>GDM (%): 65.9<br>DM2 (%): 34.0                      | <u>IG (n=52):</u><br>Metformin (starting with<br>500 mg / d, gradually<br>increase over 2 wks to a<br>maximum dose of 2500<br>mg/d, insulin was added<br>if necessary)<br>vs.<br><u>CG (n=52):</u><br>insulin treatment (daily<br>dose 0.3 IU/kg, titrated to<br>achieve the glycemic<br>targets, if necessary,<br>admission to the ward<br>and therapy with soluble<br>insulin)<br><u>Duration: until delivery</u> | Primary: 2-hour post<br>prandial blood glucose<br>(2HPG)<br>Secondary: fasting<br>glucose, 1HPG, maternal<br>weight gain, pregnancy<br>outcome and feto-<br>neonatal outcomes.                                                                                                                                                                                                                                                                                                                  | Change from enrolment to delivery:<br>glycemic control (mmol/l):<br>fasting glucose:<br>no difference: 6.42±0.98 vs. 6.62±1.57<br>(p=0.928)<br>1HPG:<br>no difference: 8.95±1.27 vs. 9.62±1.44<br>(p=0.078)<br>2HPG:<br>benefit for IG: 7.84±1.43 vs. 9.05±1.89<br>(p=0.004)                                                                                                                                                                                                                                                                                                                                                                                                           |
| 19<br>20<br>21<br>22<br>23<br>24<br>25<br>26<br>27<br>28<br>29<br>30<br>31<br>32<br>33<br>34<br>35<br>36<br>37<br>38<br>39<br>40<br>41<br>42<br>43<br>44<br>45<br>46 | <b>Ibrahim 2014</b><br>NCT01915550<br><br>RCT           | Egypt,<br>urban<br><br>08/2011-<br>04/2012 | GDM or pre-existing DM,<br>gestational age 20-34 wks<br>with insulin resistance<br>No DM1, secondary diabetes<br>or liver or renal impairment                                                                                                                                                                                                                                                       | n=90<br>100% female<br>age (yrs): 29.8 ± 5.4<br>BMI (kg/m <sup>2</sup> ):31.83 ±<br>3.23<br>Gestational age: 28.7<br>± 3.7 wks<br>GDM: 43.3 %<br>Pre-existing DM:<br>56.7 % with median<br>duration of 4 (1-15)<br>yrs | <u>IG (n=46):</u><br>Metformin (1500 mg,<br>raised to 2000 mg)<br>without increasing insulin<br>dose<br>Patients switched to CG if<br>treatment was not<br>successful to control<br>blood glucose<br>concentrations<br><u>CG (n=44):</u><br>insulin dose was<br>increased according to<br>the standard protocol                                                                                                     | Primary:<br>maternal glycemic control<br>(fasting glucose<br>≤ 95 mg/dl and 2-HPG<br>≤ 120 mg/dl)<br>Secondary:<br>maternal bouts of<br>hypoglycemia, need for<br>another hospital<br>admission for<br>uncontrolled diabetes<br>during pregnancy,<br>gestational age at<br>delivery, mode of<br>delivery, birth weight,<br>birth trauma, congenital<br>anomalies, Apgar score,<br>neonatal hypoglycemia,<br>need for neonatal<br>intensive care unit<br>admission, adverse<br>neonatal outcomes | glycemic control:<br><ul style="list-style-type: none"> <li>• better for CG: 76.1 vs. 100 %<br/>reached glycemic control (p=0.001)</li> <li>• 13 vs. 18.2 % had readmission for<br/>poor glycemic control</li> <li>• 6.5 vs. 22.7 % had bouts of<br/>maternal hypoglycaemia</li> </ul> Complications:<br><ul style="list-style-type: none"> <li>• 23.3 vs. 30.8 % had fetal<br/>macrosomia</li> <li>• 1 new-born in each group had<br/>congenital malformations</li> <li>• 7 vs. 38.5 % had neonatal<br/>hypoglycaemia</li> <li>• 18.6 vs. 41 % had NICU admission</li> <li>• 0 vs. 5.1 % had stillbirths</li> <li>• 11.6 vs. 25.6 % with respiratory<br/>distress syndrome</li> </ul> |



1  
2  
3  
4  
5  
6  
7  
8  
9  
10  
11  
12  
13  
14  
15  
16  
17  
18  
19  
20  
21  
22  
23  
24  
25  
26  
27  
28  
29  
30  
31  
32  
33  
34  
35  
36  
37  
38  
39  
40  
41  
42  
43  
44  
45  
46

BMI: Body mass index; CG: Control group; CI: Confidence interval; DM: diabetes mellitus; DM2: type 2 diabetes; FPG: fasting plasma glucose; GDM: gestational diabetes; HbA1c: haemoglobin A1c; 1 / 2HPG: 1 / 2-hour post prandial blood glucose; IG: intervention group; n: number of participants; MD: mean difference; MDa: adjusted mean difference; OGTT: Oral glucose tolerance test; RCT: randomized controlled trial; RR: Relative risk; RRa: adjusted relative risk; SD: Standard-deviation; wks: weeks; yrs: years

**Table 5: Characteristics and results of studies on pregnant women with DM**

For peer review only

1  
2  
3  
4  
5  
6  
7  
8  
9  
10  
11  
12  
13  
14  
15  
16  
17  
18  
19  
20  
21  
22  
23  
24  
25  
26  
27  
28  
29  
30  
31  
32  
33  
34  
35  
36  
37  
38  
39  
40  
41  
42  
43  
44  
45  
46

For peer review only

1  
2  
3  
4  
5  
6  
7  
8  
9  
10  
11  
12  
13  
14  
15  
16  
17  
18  
19  
20  
21  
22  
23  
24  
25  
26  
27  
28  
29  
30  
31  
32  
33  
34  
35  
36  
37  
38  
39  
40  
41  
42  
43  
44  
45  
46

**R**

For peer review only

Risk of bias

| Study            | Sequence generation | Allocation concealment | Blinding of participants/personnel | Blinding of outcome assessors | Incomplete outcome data | Selective outcome reporting | Other risk of bias |
|------------------|---------------------|------------------------|------------------------------------|-------------------------------|-------------------------|-----------------------------|--------------------|
| Abaza 2017       | 😊                   | 😊                      | 😞                                  | 😊                             | 😞                       | 😊                           | 😊                  |
| Abdulrhman 2013  | 😊                   | 😊                      | 😞                                  | 😊                             | 😊                       | 😞                           | 😊                  |
| Adibe 2013       | 😊                   | 😊                      | 😞                                  | 😞                             | 😞                       | 😊                           | 😊                  |
| Adjei 2015       | 😊                   | 😊                      | 😞                                  | 😊                             | 😊                       | 😊                           | 😞                  |
| Ali 2019         | 😊                   | 😊                      | 😞                                  | 😊                             | 😊                       | 😊                           | 😞                  |
| Amendezo 2017    | 😊                   | 😊                      | 😞                                  | 😊                             | 😞                       | 😊                           | 😞                  |
| Anderson 2001    | 😊                   | 😊                      | 😊                                  | 😊                             | 😊                       | 😊                           | 😊                  |
| Anyanwu 2016     | 😊                   | 😊                      | 😞                                  | 😊                             | 😞                       | 😊                           | 😊                  |
| Ashoush 2016     | 😊                   | 😊                      | 😞                                  | 😊                             | 😊                       | 😊                           | 😊                  |
| Asuako 2017      | 😊                   | 😊                      | 😞                                  | 😊                             | 😊                       | 😊                           | 😞                  |
| Beyuo 2015       | 😊                   | 😊                      | 😞                                  | 😊                             | 😞                       | 😞                           | 😞                  |
| Chraibi 2017     | 😊                   | 😊                      | 😞                                  | 😊                             | 😞                       | 😊                           | 😞                  |
| Debussche 2018   | 😊                   | 😊                      | 😞                                  | 😊                             | 😊                       | 😊                           | 😊                  |
| Distiller 2014   | 😊                   | 😊                      | 😞                                  | 😊                             | 😞                       | 😊                           | 😊                  |
| Elbarbary 2016   | 😊                   | 😊                      | 😞                                  | 😊                             | 😞                       | 😊                           | 😞                  |
| Elbarbary 2018   | 😊                   | 😊                      | 😊                                  | 😊                             | 😊                       | 😊                           | 😊                  |
| Elbarbary 2020   | 😊                   | 😊                      | 😊                                  | 😊                             | 😊                       | 😞                           | 😊                  |
| El Gayar 2019    | 😊                   | 😊                      | 😊                                  | 😊                             | 😊                       | 😊                           | 😞                  |
| El-Hagggar 2015  | 😊                   | 😊                      | 😞                                  | 😊                             | 😊                       | 😊                           | 😞                  |
| El-Makaky 2020   | 😊                   | 😊                      | 😞                                  | 😊                             | 😊                       | 😊                           | 😊                  |
| El-Shamy 2018    | 😞                   | 😞                      | 😊                                  | 😊                             | 😊                       | 😊                           | 😊                  |
| El-Sharkawy 2016 | 😊                   | 😊                      | 😊                                  | 😊                             | 😊                       | 😊                           | 😞                  |
| El-Sheikh 2019   | 😊                   | 😊                      | 😞                                  | 😊                             | 😞                       | 😊                           | 😞                  |
| Embaby 2016      | 😊                   | 😊                      | 😞                                  | 😊                             | 😞                       | 😊                           | 😞                  |
| Essien 2017      | 😊                   | 😊                      | 😊                                  | 😊                             | 😞                       | 😊                           | 😊                  |
| Fairall 2016     | 😊                   | 😊                      | 😊                                  | 😊                             | 😊                       | 😊                           | 😊                  |
| Fayehun 2018     | 😊                   | 😊                      | 😞                                  | 😞                             | 😊                       | 😊                           | 😊                  |
| Ghoneim 2013     | 😊                   | 😊                      | 😞                                  | 😊                             | 😊                       | 😊                           | 😞                  |
| Hailu 2018       | 😊                   | 😊                      | 😞                                  | 😊                             | 😞                       | 😊                           | 😞                  |
| Ibrahim 2014     | 😊                   | 😊                      | 😞                                  | 😊                             | 😞                       | 😊                           | 😞                  |
| Krawinkel 2018   | 😊                   | 😊                      | 😞                                  | 😞                             | 😞                       | 😊                           | 😊                  |

| Study               | Sequence generation | Allocation concealment | Blinding of participants/personnel | Blinding of outcome assessors | Incomplete outcome data | Selective outcome reporting | Other risk of bias |
|---------------------|---------------------|------------------------|------------------------------------|-------------------------------|-------------------------|-----------------------------|--------------------|
| Labhardt 2011       | 😊                   | 😊                      | 😞                                  | 😊                             | 😊                       | 😊                           | 😊                  |
| Maharaj 2016        | 😊                   | 😊                      | 😞                                  | 😊                             | 😊                       | 😊                           | 😞                  |
| Malek 2015          | 😊                   | 😊                      | 😞                                  | 😊                             | 😊                       | 😊                           | 😊                  |
| Malipa 2013         | 😊                   | 😊                      | 😞                                  | 😞                             | 😊                       | 😊                           | 😞                  |
| Mash 2014           | 😊                   | 😊                      | 😞                                  | 😞                             | 😞                       | 😊                           | 😊                  |
| Matter 2020         | 😊                   | 😊                      | 😊                                  | 😊                             | 😊                       | 😞                           | 😊                  |
| Mohamad 2009        | 😊                   | 😊                      | 😞                                  | 😊                             | 😊                       | 😊                           | 😞                  |
| Moustafa 2019       | 😊                   | 😊                      | 😞                                  | 😊                             | 😞                       | 😊                           | 😞                  |
| Muchiri 2015        | 😊                   | 😊                      | 😞                                  | 😊                             | 😊                       | 😊                           | 😞                  |
| Nteleki 2015        | 😞                   | 😊                      | 😞                                  | 😊                             | 😊                       | 😊                           | 😞                  |
| Owolabi 2019        | 😊                   | 😊                      | 😞                                  | 😊                             | 😊                       | 😞                           | 😞                  |
| Rashad 2017         | 😊                   | 😊                      | 😊                                  | 😊                             | 😞                       | 😊                           | 😞                  |
| Ragheb 2020         | 😊                   | 😊                      | 😞                                  | 😞                             | 😞                       | 😊                           | 😊                  |
| RezkAllah 2019      | 😊                   | 😊                      | 😞                                  | 😊                             | 😊                       | 😊                           | 😊                  |
| Saeed 2013          | 😊                   | 😊                      | 😞                                  | 😞                             | 😞                       | 😊                           | 😞                  |
| Salem 2010          | 😊                   | 😊                      | 😞                                  | 😞                             | 😊                       | 😊                           | 😞                  |
| Sodipo 2017         | 😊                   | 😊                      | 😞                                  | 😊                             | 😞                       | 😊                           | 😊                  |
| Somanah 2012        | 😊                   | 😊                      | 😞                                  | 😊                             | 😞                       | 😞                           | 😞                  |
| Steyn 2013          | 😊                   | 😊                      | 😞                                  | 😊                             | 😞                       | 😊                           | 😊                  |
| Takenga 2014        | 😊                   | 😊                      | 😞                                  | 😊                             | 😊                       | 😊                           | 😞                  |
| Tawfik 2016         | 😊                   | 😊                      | 😊                                  | 😊                             | 😞                       | 😊                           | 😊                  |
| Thuita 2020         | 😊                   | 😊                      | 😞                                  | 😊                             | 😊                       | 😊                           | 😊                  |
| Tsobgny-Tsague 2018 | 😊                   | 😊                      | 😞                                  | 😊                             | 😞                       | 😊                           | 😊                  |
| Utz 2018            | 😊                   | 😊                      | 😞                                  | 😊                             | 😊                       | 😞                           | 😞                  |
| Van der Hoogt 2017  | 😊                   | 😊                      | 😞                                  | 😊                             | 😞                       | 😊                           | 😞                  |
| Van Rooijen 2004    | 😊                   | 😊                      | 😞                                  | 😊                             | 😊                       | 😊                           | 😞                  |
| Webb 2015           | 😊                   | 😊                      | 😊                                  | 😊                             | 😞                       | 😊                           | 😊                  |
| Yakoot 2019         | 😊                   | 😊                      | 😞                                  | 😞                             | 😊                       | 😞                           | 😞                  |
| Yan 2014            | 😊                   | 😊                      | 😞                                  | 😊                             | 😊                       | 😊                           | 😞                  |

😊: low, 😞: unclear, 😞: high risk of bias

Table 6: Judgements on risk of bias

1  
2  
3  
4  
5  
6  
7  
8  
9  
10  
11  
12  
13  
14  
15  
16  
17  
18  
19  
20  
21  
22  
23  
24  
25  
26  
27  
28  
29  
30  
31  
32  
33  
34  
35  
36  
37  
38  
39  
40  
41  
42  
43  
44  
45  
46  
47  
48  
49  
50  
51  
52  
53  
54  
55  
56  
57  
58  
59  
60

For peer review only

1  
2  
3  
4  
5  
6  
7  
8  
9  
10  
11  
12  
13  
14  
15  
16  
17  
18  
19  
20  
21  
22  
23  
24  
25  
26  
27  
28  
29  
30  
31  
32  
33  
34  
35  
36  
37  
38  
39  
40  
41  
42  
43  
44  
45  
46  
47  
48  
49  
50  
51  
52  
53  
54  
55  
56  
57  
58  
59  
60

Supplement 2

For peer review only

## Search strategies

### Medline (Ovid)

Search on 19.11.2018, 1470 references, Update from 2018 to Current on 20.08.2020: 541 references

| Nr.       | Searches                                                            |
|-----------|---------------------------------------------------------------------|
| 1.        | exp Diabetes Mellitus/                                              |
| 2.        | Diabetes.tw                                                         |
| <b>3.</b> | <b>or/1-2</b>                                                       |
| 4.        | Africa.tw                                                           |
| 5.        | Exp Africa/                                                         |
| 6.        | Algeria\$.tw or exp Algeria/                                        |
| 7.        | Angol\$.tw or exp Angola/                                           |
| 8.        | Benin\$.tw or exp Benin/                                            |
| 9.        | Botswan\$.tw or exp Botswana/                                       |
| 10.       | Burkina Faso.tw or exp Burkina Faso/                                |
| 11.       | Burund\$.tw or exp Burundi/                                         |
| 12.       | Cameroon\$.tw or exp Cameroon/                                      |
| 13.       | Cape Verde.tw or exp Cape Verde/                                    |
| 14.       | Central African Republic\$.tw or exp Central African Republic/      |
| 15.       | Chad\$.tw or exp Chad/                                              |
| 16.       | Comoros\$.tw or exp Comoros/                                        |
| 17.       | Cote d'Ivoire.tw or exp Cote d'Ivoire/                              |
| 18.       | Democratic Republic of Congo.tw or exp Democratic Republic of Congo |
| 19.       | Djibout\$.tw or exp Djibouti/                                       |
| 20.       | Egypt\$.tw or exp Egypt/                                            |
| 21.       | Equatorial Guinea\$.tw or exp Equatorial Guinea/                    |
| 22.       | Eritrea\$.tw or exp Eritrea/                                        |
| 23.       | Ethiop\$.tw or exp Ethiopia/                                        |
| 24.       | Gabon\$.tw or exp Gabon/                                            |
| 25.       | Gambia\$.tw or exp Gambia/                                          |
| 26.       | Ghana\$.tw or exp Ghana/                                            |
| 27.       | Guinea\$.tw or exp Guinea/                                          |
| 28.       | Guinea-Bissau.tw or exp Guinea-Bissau/                              |
| 29.       | Kenya\$.tw or exp Kenya/                                            |
| 30.       | Lesoth\$.tw or exp Lesotho/                                         |
| 31.       | Liberia\$.tw or exp Liberia/                                        |
| 32.       | Libya\$.tw or exp Libya/                                            |
| 33.       | Madagascar\$.tw or exp Madagascar/                                  |
| 34.       | Malawi\$.tw or exp Malawi/                                          |



| Nr. | Searches                                     |
|-----|----------------------------------------------|
| 35. | Mali.tw or exp Mali/                         |
| 36. | Mauritania\$.tw or exp Mauritania/           |
| 37. | Mauritius\$.tw or exp Mauritius/             |
| 38. | Morocc\$.tw or exp Morocco/                  |
| 39. | Mozambique\$.tw or exp Mozambique/           |
| 40. | Namibia\$.tw or exp Namibia/                 |
| 41. | Niger.tw or exp Niger/                       |
| 42. | Nigeria\$.tw or exp Nigeria/                 |
| 43. | Rwanda\$.tw or exp Rwanda/                   |
| 44. | (Sao Tome and Principe).tw                   |
| 45. | Senegal\$.tw or exp Senegal/                 |
| 46. | Seychell\$.tw                                |
| 47. | Sierra Leone.tw or exp Sierra Leone/         |
| 48. | Somalia\$.tw or exp Somalia/                 |
| 49. | South Africa\$.tw or exp South Africa.de     |
| 50. | South Sudan.tw or exp South Sudan/           |
| 51. | Sudan\$.tw or exp Sudan/                     |
| 52. | Swaziland\$.tw or exp Swaziland/             |
| 53. | Tanzania\$.tw or exp Tanzania/               |
| 54. | Togo\$.tw or exp Togo/                       |
| 55. | Tunisia\$.tw or exp Tunisia/                 |
| 56. | Uganda\$.tw or exp Uganda/                   |
| 57. | Zambia\$.tw or exp Zambia/                   |
| 58. | Zimbabwe\$.tw or exp Zimbabwe/               |
| 59. | Somaliland\$.tw or exp Somaliland/           |
| 60. | Sahrawi Arab Democratic Republic.tw.         |
| 61. | or/4-60                                      |
| 62. | randomized controlled trial.pt.              |
| 63. | controlled clinical trial.pt.                |
| 64. | (randomized or randomised or randomly).ti,ab |
| 65. | placebo.ti,ab.                               |
| 66. | trial.ti,ab.                                 |
| 67. | groups.ti,ab.                                |
| 68. | or/62-67                                     |
| 69. | 3 and 61 and 68                              |
| 70. | exp animals/ not humans.sh.                  |
| 71. | 69 not 70                                    |
| 72. | 71 not (comment or editorial).pt.            |

**CENTRAL**

Search on 14.01.2019, 439 trials, Update from 2018 to Current on 20.08.2020: 244 trials

|    |                                                                                                                       |
|----|-----------------------------------------------------------------------------------------------------------------------|
| 1  | Africa, explode all trees                                                                                             |
| 2  | Algeria* or Angol* or Benin* or Botswan*                                                                              |
| 3  | (Burkina Faso) or Burund* or Cameroon* or (Cape Verde) or (Central African Republic)                                  |
| 4  | Chad* or Comoros* or Cote d'Ivoire or Congo*                                                                          |
| 5  | Djibout* or Egypt* or (Equatorial Guinea*) or Eritrea*                                                                |
| 6  | Ethiop* or Gabon* or Gambia* or Ghana* or Guinea* or Guinea-Bissau                                                    |
| 7  | Kenya* or Lesoth* or Liberia* or Libya* or Madagascar* or Malawi*                                                     |
| 8  | Mali* or Mauritania* or Mauritius* or Morocc* or Mozambique* or Namibia* or Niger*                                    |
| 9  | Nigeria* or Rwanda* or (Sao Tome and Principe) or Senegal* or Seychell*                                               |
| 10 | Sierra Leone or Somalia* or (South Africa) or (South Sudan*) or Sudan* or Swasiland                                   |
| 11 | Tanzania* or Togo* or Tunisia* or Uganda* or Zambia* or Zimbabwe* or Somaliland or (Sahrawi Arab Democratic Republic) |
| 12 | #1 or #2 or #3 or #4 or #5 or #6 or #7 or #8 or #9 or #10 or #11                                                      |
| 13 | MeSH descriptor Diabetes, this term only                                                                              |
| 14 | MESH descriptor Diabetes mellitus, explode all trees                                                                  |
| 15 | Diabetes near 3 gestation*                                                                                            |
| 16 | Latent autoimmune diabetes in adults                                                                                  |
| 17 | Prediabetes                                                                                                           |
| 18 | Insulin resistan*                                                                                                     |
| 20 | HBA1C                                                                                                                 |
| 21 | Diabet* near 3 (angiopath* or foot orfeet or retinopath*)                                                             |
| 22 | Diabet* near 3 (cardiomyopathy* or coma or ketoacido* or neuropath*)                                                  |
| 23 | #13 or #14 or #15 or #16 or #17 or #18 or #19 or #20 or #21                                                           |
| 32 | #12 and #23                                                                                                           |

**CINAHL**

Search on 20.08.2020: 19 results

(Africa\$ or Africa\$ or Algeria\$ or Angol\$ or Benin\$ or Botswan\$ or (Burkina Faso) or Burund\$ or Cameroon\$ or (Cape Verde) or (Central African Republic) or Chad\$ or Comoros\$ or Cote d'Ivoire or Congo\$ Djibout\$ or Egypt\$ or (Equatorial Guinea\$) or Eritrea\$

1  
2  
3 or Ethiopia\$ or Gabon\$ or Gambia\$ or Ghana\$ or Guinea\$ or Guinea-Bissau or Kenya\$ or  
4 Lesotho\$ or Liberia\$ or Libya\$ or Madagascar\$ or Malawi\$ or Mali\$ or Mauritania\$ or  
5 Mauritius\$ or Morocco\$ or Mozambique\$ or Namibia\$ or Niger\$ or Nigeria\$ or Rwanda\$ or  
6 (Sao Tome and Principe) or Senegal\$ or Seychell\$ or Sierra Leone or Somalia\$ or (South  
7 Africa) or (South Sudan\$) or Sudan\$ or Swasiland or Tanzania\$ or Togo\$ or Tunisia\$ or  
8 Uganda\$ or Zambia\$ or Zimbabwe\$ or Somaliland or (Sahrawi Arab Democratic Republic))

9  
10  
11 in Abstract

12  
13  
14 AND

15 diabetes in Abstract

16  
17 AND

18 randomized or rct or randomized in Abstract

19  
20 AND

21 In English

22  
23 AND

24 Peer-reviewed

25  
26 And

27 Humans

28  
29  
30  
31 **International Clinical Trials Registry Platform**

32 Search on 9.-10.10.2019, update on 25.08.2020 (registration January 2019 to 31.08.2020)

33 <http://apps.who.int/trialsearch/AdvSearch.aspx>

- 34  
35  
36 1. Africa or African in the Title and diabetes or diabetic or HbA1c in the condition,  
37 Recruitment status: all: 90 records for 90 trials (9.10.2019)
- 38 2. diabetes or diabetic or HbA1c in the condition  
39 Recruitment status: all  
40 Countries of recruitment: Algeria or Angola or Benin or Botswana or Burkina Faso or  
41 Burundi or Cameroon or Central African Republic or Chad or Congo or Cite D'ivoire:  
42 96 record for 63 trials
- 43 3. diabetes or diabetic or HbA1c in the condition  
44 Recruitment status: all  
45 Countries of recruitment: Democratic Republic of Congo or Djibouti or Egypt or  
46 Equatorial Guinea or Eritrea or Ethiopia: 292 records for 159 trials
- 47 4. diabetes or diabetic or HbA1c in the condition  
48 Recruitment status: all  
49 Countries of recruitment: Gabon or Gambia or Ghana or Guinea or Guinea-Bissau or  
50 Kenya or Lesotho or Liberia or Lybia: 22 records for 22 trials
- 51 5. diabetes or diabetic or HbA1c in the condition  
52  
53  
54  
55  
56  
57  
58  
59  
60

1  
2  
3 Recruitment status: all

4 Countries of recruitment: Madagascar or Malawi or Mali or Mauritania or Mauritius or  
5 Morocco or Mozambique: 96 records for 34 trials

- 6  
7  
8 6. diabetes or diabetic or HbA1c in the condition

9 Recruitment status: all

10 Countries of recruitment: Nigeria: 13 records for 13 trials

- 11  
12  
13 7. diabetes or diabetic or HbA1c in the condition

14 Recruitment status: all

15 Countries of recruitment: Namibia or Niger or Rwanda or (Sao Tome and Principe) or  
16 Senegal or Seychelles or Sierra Leone or Somalia or South Sudan or Sudan or  
17 Swaziland:

18  
19  
20 11 records for 11 trials

- 21  
22 8. diabetes or diabetic or HbA1c in the condition

23 Recruitment status: all

24 Countries of recruitment: South Africa: 1528 records for 429 trials:

- 25  
26  
27 9. diabetes or diabetic or HbA1c in the condition

28 Recruitment status: all

29 Countries of recruitment: Togo or Tunisia or Uganda or Zambia or Zimbabwe: 129  
30 records for 50 trials  
31  
32  
33  
34  
35  
36  
37  
38  
39  
40  
41  
42  
43  
44  
45  
46  
47  
48  
49  
50  
51  
52  
53  
54  
55  
56  
57  
58  
59  
60

## African Journals Online

<https://www.ajol.info/index.php/index/search/search?query=%28diabetes+or+diabetic+or+hba1c%29+and+%28random+or+randomized+or+randomised%29&dateFromYear=2004&dateFromMonth=01&dateFromDay=1&dateToYear=2020&dateToMonth=10&dateToDay=14&autohors=>

Advanced search 14.10.2020

Titel: (diabetes or diabetic or hba1c) and (random or randomized or randomised)

30 results

## African Index Medicus Database

[http://indexmedicus.afro.who.int/aim/opac\\_css/index.php?lvl=search\\_result&get\\_query=4](http://indexmedicus.afro.who.int/aim/opac_css/index.php?lvl=search_result&get_query=4)

Advanced search 14.10.2020

Titel, Expression booléenne: (diabetes or diabetic or hba1c) and (random or randomized or randomised)

122 results, no potentially eligible references

# 1 List of included and excluded studies

## 1.1 List of included studies

### Abaza 2017

Abaza H, Marschollek M. SMS education for the promotion of diabetes self-management in low & middle income countries: a pilot randomized controlled trial in Egypt. BMC public health. 2017;17(1):962.

Abaza H, Marschollek M, Schulze M. SMS Education for the Promotion of Diabetes Self-Management in Low & Middle Income Countries: A Randomized Controlled Trial in Egypt. Studies in Health Technology & Informatics. 2017;245:1209.

### Abdulrhman 2013

Abdulrhman MM, El-Hefnawy MH, Aly RH, Shatla RH, Mamdouh RM, Mahmoud DM, et al. Metabolic effects of honey in type 1 diabetes mellitus: a randomized crossover pilot study. Journal of Medicinal Food. 2013;16(1):66-72.

### Adibe 2013

Adibe MO, Ukwe CV, Aguwa CN. The Impact of Pharmaceutical Care Intervention on the Quality of Life of Nigerian Patients Receiving Treatment for Type 2 Diabetes. Value in Health Regional Issues. 2013;2(2):240-7.

Adibe MO, Aguwa CN, Ukwe CV. Cost-Utility Analysis of Pharmaceutical Care Intervention Versus Usual Care in Management of Nigerian Patients with Type 2 Diabetes. Value in Health Regional Issues. 2013;2(2):189-98.

### Adjei 2015

Adjei DN, Agyemang C, Dasah JB, Kuranchie P, Amoah AG. The effect of electronic reminders on risk management among diabetic patients in low resourced settings. Journal of Diabetes & its Complications. 2015;29(6):818-21.

### Ali 2019

Ali S, Ghanem Y, Sharaki O, Hewedy W, al. e. The impact of different regimens of vitamin d3 on glucose homeostasis in type 2 diabetic patients. Asian journal of pharmaceutical and clinical research. 2019;12(12):21- 6.

### Amendezo 2017

Amendezo E, Walker Timothy D, Karamuka V, Robinson B, Kavabushi P, Ntirenganya C, et al. Effects of a lifestyle education program on glycemic control among patients with diabetes at Kigali University Hospital, Rwanda: A randomized controlled trial. Diabetes Research & Clinical Practice. 2017;126:129-37.

### Anderson 2001

1  
2  
3 Anderson RA, Roussel AM, Zouari N, Mahjoub S, Matheau JM, Kerkeni A. Potential  
4 antioxidant effects of zinc and chromium supplementation in people with type 2 diabetes  
5 mellitus. *Journal of the American College of Nutrition*. 2001;20(3):212-8.

6  
7  
8 **Anyanwu 2016**

9 Anyanwu AC, Fasanmade OA, Odeniyi IA, Iwuala S, Coker HB, Ohwovoriole AE. Effect of  
10 Vitamin D supplementation on glycemic control in Type 2 diabetes subjects in Lagos,  
11 Nigeria. *Indian Journal of Endocrinology and Metabolism*. 2016;20(2):189-94.

12  
13  
14 **Ashoush 2016**

15 Ashoush S, El-Said M, Fathi H, Abdelnaby M. Identification of metformin poor responders,  
16 requiring supplemental insulin, during randomization of metformin versus insulin for the  
17 control of gestational diabetes mellitus. *Journal of obstetrics and gynaecology research*.  
18 2016;42(6):640- 7.

19  
20  
21  
22 **Asuako 2017**

23 Asuako B, Moses MO, Eghan BA, Sarpong PA. Fasting plasma glucose and lipid profiles of  
24 diabetic patients improve with aerobic exercise training. *Ghana Medical Journal*.  
25 2017;51(3):120-7.

26  
27  
28  
29 **Beyuo 2015**

30 Beyuo T, Obed SA, Adjepong-Yamoah KK, Bugyei KA, Oppong SA, Marfoh K. Metformin  
31 versus Insulin in the Management of Pre-Gestational Diabetes Mellitus in Pregnancy and  
32 Gestational Diabetes Mellitus at the Korle Bu Teaching Hospital: A Randomized Clinical  
33 Trial. *PLoS ONE [Electronic Resource]*. 2015;10(5):e0125712.

34  
35  
36  
37 **Chraibi 2017**

38 Chraibi A, Al-Herz S, Nguyen BD, Soeatmadji DW, Shinde A, Lakshmivenkataraman B, et al.  
39 An RCT Investigating Patient-Driven Versus Physician-Driven Titration of BIAsp 30 in  
40 Patients with Type 2 Diabetes Uncontrolled Using NPH Insulin. *Diabetes Therapy Research,*  
41 *Treatment and Education of Diabetes and Related Disorders*. 2017;8(4):767-80.

42  
43  
44  
45 **Debussche 2018**

46 Debussche X, Besancon S, Balcou-Debussche M, Ferdynus C, Delisle H, Huiart L, et al.  
47 Structured peer-led diabetes self-management and support in a low-income country: The  
48 ST2EP randomised controlled trial in Mali. *PLoS ONE*. 2018;13(1):e0191262.

49  
50  
51  
52 **Distiller 2014**

53 Distiller LA, Nortje H, Wellmann H, Amod A, Lombard L. A 24-week, prospective,  
54 randomized, open-label, treat-to-target pilot study of obese type 2 diabetes patients with  
55 severe insulin resistance to assess the addition of exenatide on the efficacy of U-500 regular  
56 insulin plus metformin. *Endocrine practice*. 2014;20(11):1143- 50.

57  
58  
59  
60 **El Gayar 2019**

1  
2  
3 El Gayar MH, Aboromia MMM, Ibrahim NA, Abdel Hafiz MH. Effects of ginger powder  
4 supplementation on glycemic status and lipid profile in newly diagnosed obese patients with  
5 type 2 diabetes mellitus. *Obesity medicine*. 2019;14.

6  
7  
8 **EI-Haggag 2015**

9 El-Haggag SM, Farrag WF, Kotkata FA. Effect of ketotifen in obese patients with type 2  
10 diabetes mellitus. *Journal of Diabetes & its Complications*. 2015;29(3):427-32.

11  
12  
13 **EI-Makaky 2020**

14 El-Makaky Y, Shalaby HK. The effects of non-surgical periodontal therapy on glycemic  
15 control in diabetic patients: a randomized controlled trial. *Oral diseases*. 2020;26:822-9.

16  
17  
18 **EI-Shamy 2018**

19 El-Shamy FF, El-Kholy SS, Labib M, Kabel AM. Ameliorative potential of acupressure on  
20 gestational diabetes mellitus: a randomized controlled trial. *Journal of complementary and*  
21 *integrative medicine*. 2018; 16(1).

22  
23  
24 **EI-Sheikh 2019**

25 El-Sheikh HM, El-Haggag SM, Elbedewy TA. Comparative study to evaluate the effect of L-  
26 carnitine plus glimepiride versus glimepiride alone on insulin resistance in type 2 diabetic  
27 patients. *Diabetes and metabolic syndrome: clinical research and reviews*. 2019;13(1):167-  
28 73.

29  
30  
31 **EI- Sharkawy 2016**

32 El- Sharkawy HM, Anees MM, Van Dyke TE. Propolis improves periodontal status and  
33 glycemic control in patients with type 2 diabetes mellitus and chronic periodontitis: a  
34 randomized clinical trial. *Journal of periodontology*. 2016;87(12):1418-26.

35  
36  
37 **Elbarbary 2016**

38 Elbarbary NS. Effectiveness of the low-glucose suspend feature of insulin pump during  
39 fasting during Ramadan in type 1 diabetes mellitus. *Diabetes/metabolism research and*  
40 *reviews*. 2016;32(6):623- 33.

41  
42  
43 **Elbarbary 2018**

44 Elbarbary NS, Ismail EAR, El-Naggag AR, Hamouda MH, El-Hamamsy M. The effect of 12  
45 weeks carnosine supplementation on renal functional integrity and oxidative stress in  
46 pediatric patients with diabetic nephropathy: a randomized placebo-controlled trial. *Pediatric*  
47 *diabetes*. 2018;19(3):470- 7.

48  
49  
50 **Elbarbary 2020**

51 Elbarbary NS, Ismail EAR, Zaki MA, Darwish YW, Ibrahim MZ, El-Hamamsy M. Vitamin B  
52 complex supplementation as a homocysteine-lowering therapy for early stage diabetic  
53 nephropathy in pediatric patients with type 1 diabetes: A randomized controlled trial. *Clinical*  
54 *Nutrition*. 2020;39(1):49-56.

55  
56  
57 **Embaby 2016**



1  
2  
3 Embaby H, Elsayed E, Fawzy M. Insulin Sensitivity and Plasma Glucose Response to  
4 Aerobic Exercise in Pregnant Women at Risk for Gestational Diabetes Mellitus. Ethiopian  
5 journal of health sciences. 2016;26(5):409- 14.  
6  
7

8 **Essien 2017**

9 Essien O, Otu A, Umoh V, Enang O, Hicks JP, Walley J. Intensive Patient Education  
10 Improves Glycaemic Control in Diabetes Compared to Conventional Education: A  
11 Randomised Controlled Trial in a Nigerian Tertiary Care Hospital. PLoS ONE  
12 2017;12(1):e0168835.  
13  
14

15 **Fairall 2016**

16 Fairall LR, Folb N, Timmerman V, Lombard C, Steyn K, Bachmann MO, et al. Educational  
17 Outreach with an Integrated Clinical Tool for Nurse-Led Non-communicable Chronic Disease  
18 Management in Primary Care in South Africa: a Pragmatic Cluster Randomised Controlled  
19 Trial. Plos medicine. 2016;13(11):e1002178.  
20  
21  
22

23 **Fayehun 2018**

24 Fayehun AF, Olowookere OO, Ogunbode AM, Adetunji AA, Esan A. Walking prescription of  
25 10 000 steps per day in patients with type 2 diabetes mellitus: a randomised trial in Nigerian  
26 general practice. British Journal of General Practice. 2018;68(667):e139-e45.  
27  
28  
29

30 **Ghoneim 2013**

31 Ghoneim EM, Abd El Ghany AA. Behavior of intraocular pressure after intravitreal injection of  
32 triamcinolone acetonide among egyptians. Ophthalmology and Therapy. 2013;2(2):121-30.  
33  
34

35 **Hailu 2018**

36 Hailu FB, Hjortdahl P, Moen A. Nurse-Led Diabetes Self-Management Education Improves  
37 Clinical Parameters in Ethiopia. Frontiers in Public Health. 2018;6:302.  
38  
39

40 **Ibrahim 2014**

41 Ibrahim MI, Hamdy A, Shafik A, Taha S, Anwar M, Faris M. The role of adding metformin in  
42 insulin-resistant diabetic pregnant women: a randomized controlled trial. Archives of  
43 Gynecology & Obstetrics. 2014;289(5):959-65.  
44  
45

46 **Krawinkel 2018**

47 Krawinkel MB, Ludwig C, Swai ME, Yang RY, Chun KP, Habicht SD. Bitter gourd reduces  
48 elevated fasting plasma glucose levels in an intervention study among prediabetics in  
49 Tanzania. Journal of Ethnopharmacology. 2018;216:1-7.  
50  
51

52 **Labhardt 2011**

53 Labhardt ND, Balo JR, Ndam M, Manga E, Stoll B. Improved retention rates with low-cost  
54 interventions in hypertension and diabetes management in a rural African environment of  
55 nurse-led care: a cluster-randomised trial. Tropical Medicine & International Health.  
56 2011;16(10):1276-84.  
57  
58  
59

60 **Maharaj 2016**

1  
2  
3 Maharaj SS, Nuhu JM. Rebound exercise: A beneficial adjuvant for sedentary non-insulin-  
4 dependent type 2 diabetic individuals in a rural environment. *Australian Journal of Rural*  
5 *Health*. 2016;24(2):123-9.

#### 8 **Malek 2015**

9 Malek R, Ajili F, Assaad-Khalil SH, Shinde A, Chen JW, Van den Berg E. Similar glucose  
10 control with basal-bolus regimen of insulin detemir plus insulin aspart and thrice-daily  
11 biphasic insulin aspart 30 in insulin-naive patients with type 2 diabetes: Results of a 50-week  
12 randomized clinical trial of stepwise insulin intensification. *Diabetes & Metabolism*.  
13 2015;41(3):223-30.

#### 17 **Marais 2018**

18 Marais C, Hall DR, van Wyk L, Conradie M. Randomized cross-over trial comparing the  
19 diagnosis of gestational diabetes by oral glucose tolerance test and a designed breakfast  
20 glucose profile. *International Journal of Gynaecology & Obstetrics*. 2018;141(1):85-90.

#### 23 **Malipa 2013**

24 Malipa M, Menon J. The relationship between compliance and quality of life among  
25 adolescents with diabetes mellitus type1. *Medical Journal of Zambia*. 2013;40(3):93-103.

#### 28 **Mash 2014**

29 Mash RJ, Rhode H, Zwarenstein M, Rollnick S, Lombard C, Steyn K, et al. Effectiveness of a  
30 group diabetes education programme in under-served communities in South Africa: a  
31 pragmatic cluster randomized controlled trial. *Diabetic Medicine*. 2014;31(8):987-93.

32 Mash R, Kroukamp R, Gaziano T, Levitt N. Cost-effectiveness of a diabetes group education  
33 program delivered by health promoters with a guiding style in underserved communities in  
34 Cape Town, South Africa. *Patient Education & Counseling*. 2015;98(5):622-6.

#### 39 **Matter 2020**

40 Matter RM, Elbarbary NS, Ismail EAR, Darwish YW, Nada AS, Banoub VP. Zinc  
41 supplementation improves glucose homeostasis in patients with  $\beta^2$ -thalassemia major  
42 complicated with diabetes mellitus: a randomized controlled trial. *Nutrition* 2020;73.

#### 45 **Mohamad 2009**

46 Mohamad RH, Zekry ZK, Al-Mehdar HA, Salama O, El-Shaieb SE, El-Basmy AA, et al.  
47 Camel milk as an adjuvant therapy for the treatment of type 1 diabetes: verification of a  
48 traditional ethnomedical practice. *Journal of Medicinal Food*. 2009;12(2):461-5.

#### 52 **Moustafa 2019**

53 Moustafa HAM, El Wakeel LM, Halawa MR, Sabri NA, El-Bahy AZ, Singab AN. Effect of  
54 *Nigella Sativa* oil versus metformin on glycemic control and biochemical parameters of newly  
55 diagnosed type 2 diabetes mellitus patients. *Endocrine*. 2019;65(2):286- 94.

#### 58 **Muchiri 2016**

1  
2  
3 Muchiri JW, Gericke GJ, Rheeder P. Effect of a nutrition education programme on clinical  
4 status and dietary behaviours of adults with type 2 diabetes in a resource-limited setting in  
5 South Africa: a randomised controlled trial. *Public Health Nutrition*. 2016;19(1):142-55.

6  
7 Muchiri JW, Gericke GJ, Rheeder P. Impact of nutrition education on diabetes knowledge  
8 and attitudes of adults with type 2 diabetes living in a resource-limited setting in South Africa:  
9 a randomised controlled trial. *Journal of Endocrinology, Metabolism and Diabetes of South  
10 Africa*. 2016;21(2):26-34.

#### 11 **Nteleki 2015**

12 Nteleki B, Abrahamse H, Houreld NN. Conventional podiatric intervention and phototherapy  
13 in the treatment of diabetic ulcers. *Seminars in Vascular Surgery*. 2015;28(3-4):172-83.

#### 14 **Owolabi 2019**

15 Owolabi EO, Goon DT, Ajayi AI. Efficacy, acceptability and feasibility of daily text-messaging  
16 in promoting glycaemic control and other clinical outcomes in a low-resource setting of South  
17 Africa: A randomised controlled trial. *PLoS ONE [Electronic Resource]*.  
18 2019;14(11):e0224791.

19 Owolabi EO, Goon DT, Ajayi AI. Impact of mobile phone text messaging intervention on  
20 adherence among patients with diabetes in a rural setting: A randomized controlled trial.  
21 *Medicine*. 2020;99(12):1-8.

#### 22 **Ragheb 2020**

23 Ragheb SR, El Wakeel LM, Nasr MS, Sabri NA. Impact of Rutin and Vitamin C combination  
24 on oxidative stress and glycemic control in patients with type 2 diabetes. *Clinical nutrition  
25 ESPEN*. 2020;35:128-35.

#### 26 **Rashad 2017**

27 Rashad H, Metwally FM, Ezzat SM, Salama MM, Hasheesh A, Abdel Motaal A. Randomized  
28 double-blinded pilot clinical study of the antidiabetic activity of *Balanites aegyptiaca* and  
29 UPLC-ESI-MS/MS identification of its metabolites. *Pharmaceutical Biology*. 2017;55(1):1954-  
30 61.

#### 31 **RezkAllah 2019**

32 RezkAllah SS, Takla MK. Effects of different dosages of interval training on glycemic control  
33 in people with prediabetes: a randomized controlled trial. *Diabetes spectrum*.  
34 2019;32(2):125- 31.

#### 35 **Saeed 2013**

36 Saeed AM. Combined vitrectomy and intravitreal injection versus combined laser and  
37 injection for treatment of intractable diffuse diabetic macular edema. *Clinical Ophthalmology*.  
38 2013;7:283-97.

#### 39 **Salem 2010**

1  
2  
3 Salem MA, Aboelasar MA, Elbarbary NS, Elhilaly RA, Refaat YM. Is exercise a therapeutic  
4 tool for improvement of cardiovascular risk factors in adolescents with type 1 diabetes  
5 mellitus? A randomised controlled trial. *Diabetology & metabolic syndrome*. 2010;2(1):47.

#### 8 **Sodipo 2017**

9 Sodipo OO, Adedokun A, Olusola AA. Effect of self-monitoring of blood glucose on  
10 glycaemic outcome among type 2 diabetic patients. *South african family practice*.  
11 2017;59(6):208- 13.

#### 14 **Somanah 2012**

15 Somanah J, Aruoma OI, Gunness TK, Kowelssur S, Dambala V, Murad F, et al. Effects of a  
16 short term supplementation of a fermented papaya preparation on biomarkers of diabetes  
17 mellitus in a randomized Mauritian population. *Preventive Medicine*. 2012;54 Suppl:S90-7.

#### 20 **Steyn 2013**

21 Steyn K, Lombard C, Gwebushe N, Fourie JM, Everett-Murphy K, Zwarenstein M, et al.  
22 Implementation of national guidelines, incorporated within structured diabetes and  
23 hypertension records at primary level care in Cape Town, South Africa: a randomised  
24 controlled trial. *Glob Health Action*. 2013;6:20796.

#### 28 **Takenga 2014**

29 Takenga C, Berndt RD, Musongya O, Kitero J, Katoke R, Molo K, et al. An ICT-Based  
30 Diabetes Management System Tested for Health Care Delivery in the African Context.  
31 *International Journal of Telemedicine & Applications*. 2014;2014:437307.

#### 35 **Tawfik 2016**

36 Tawfik MY, Mohamed RA. The impact of communicating cardiovascular risk in type 2  
37 diabetics on patient risk perception, diabetes self-care, glycosylated hemoglobin, and  
38 cardiovascular risk. *Journal of public health*. 2016;24(2):153- 64.

#### 41 **Thuita 2020**

42 Thuita AW, Kiage BN, Onyango AN, Makokha AO. Effect of a nutrition education programme  
43 on the metabolic syndrome in type 2 diabetes mellitus patients at a level 5 Hospital in Kenya:  
44 "a randomized controlled trial". *BMC Nutr*. 2020;6:30.

#### 47 **Tsobgny-Tsague 2018**

48 Tsobgny-Tsague NF, Lontchi-Yimagou E, Nana ARN, Tankeu AT, Katte JC, Dehayem MY,  
49 et al. Effects of nonsurgical periodontal treatment on glycated haemoglobin on type 2  
50 diabetes patients (PARODIA 1 study): a randomized controlled trial in a sub-Saharan Africa  
51 population. *BMC Oral Health*. 2018;18(1):28.

#### 55 **Utz 2018**

56 Utz B, Assarag B, Smekens T, Ennassiri H, Lekhal T, El Ansari N, et al. Detection and initial  
57 management of gestational diabetes through primary health care services in Morocco: An  
58 effectiveness-implementation trial. *PloS one*. 2018;13(12):e0209322.

**van der Hoogt 2017**

van der Hoogt M, van Dyk JC, Dolman RC, Pieters M. Protein and fat meal content increase insulin requirement in children with type 1 diabetes - Role of duration of diabetes. *Journal of clinical and translational endocrinology*. 2017;10:15- 21.

**van Rooijen 2004**

van Rooijen AJ, Rheeder P, Eales CJ, Becker PJ. Effect of exercise versus relaxation on haemoglobin A1C in Black females with type 2 diabetes mellitus. *Qjm*. 2004;97(6):343-51.

**Webb 2015**

Webb EM, Rheeder P, Van Zyl DG. Diabetes care and complications in primary care in the Tshwane district of South Africa. *Primary care diabetes*. 2015;9(2):147-54.

Webb EM, Rheeder P, Roux P. Screening in Primary Care for Diabetic Retinopathy, Maculopathy and Visual Loss in South Africa. *Ophthalmologica*. 2016;235(3):141-9.

Webb EM, Rheeder P. A cluster-randomized trial to estimate the effect of mobile screening and treatment feedback on HbA1c and diabetes-related complications in Tshwane primary health care clinics, South Africa. *Primary care diabetes*. 2017;11(6):546-54.

**Yakoot 2019**

Yakoot M, Abdelatif M, Helmy S. Efficacy of a new local limb salvage treatment for limb-threatening diabetic foot wounds-a randomized controlled study. *Diabetes, Metabolic Syndrome and Obesity: Targets and Therapy*. 2019;12:1659.

**Yan 2014**

Yan H, Prista A, Ranadive SM, Damasceno A, Caupers P, Kanaley JA, et al. Effect of Aerobic Training on Glucose Control and Blood Pressure in T2DDM East African Males. *Isrn Endocrinology Print*. 2014;2014:864897.

## 1.2 List of excluded studies

### 1.2.1 Other design (28 references)

1. Abd El Hameed AA, Shreif HE, Mowafy HE. The role of continuing metformin therapy during pregnancy in the reduction of gestational diabetes and improving pregnancy outcomes in women with polycystic ovary syndrome. *Middle east fertility society journal*. 2011;16(3):204- 8.
2. Abdelaziz TS, Sadek KM. Effect of reducing medication regimen complexity on glycaemic control in patients with diabetes. *Romanian Journal of Internal Medicine*. 2019;57(1):23-9.
3. Agboola-Abu CF, Ohwovoriole AE, Akinlade KS. The effect of oral hypoglycaemic agents on dyslipidaemia in Nigerian patients with newly diagnosed non-insulin dependent diabetes mellitus--a prospective study. *West African Journal of Medicine*. 2000;19(2):126-31.
4. Assah FK, Atanga EN, Enoru S, Sobngwi E, Mbanya JC. Community-based peer support significantly improves metabolic control in people with Type 2 diabetes in Yaounde, Cameroon. *Diabetic Medicine*. 2015;32(7):886-9.
5. Bahramikia S, Yazdanparast R. Phytochemistry and medicinal properties of *Teucrium polium* L. (Lamiaceae). *Phytotherapy Research*. 2012;26(11):1581-93.
6. Bailey CJ, Iqbal N, T'Joel C, List JF. Dapagliflozin monotherapy in drug-naive patients with diabetes: a randomized-controlled trial of low-dose range. *Diabetes, Obesity & Metabolism*. 2012;14(10):951-9.
7. Bekkouche L, Bouchenak M, Malaisse WJ, Yahia DA. The Mediterranean diet adoption improves metabolic, oxidative, and inflammatory abnormalities in Algerian metabolic syndrome patients. *Hormon- und Stoffwechselforschung / Hormones et métabolisme [Hormone and metabolic research]*. 2014;46(4):274- 82.
8. Bello SI, Ganiyu KA, Dakop YO, Erah PO. Pharmacist's intervention in the control of blood sugar levels in randomised diabetes patients at a primary health care setting in Benin City. *Nigerian Quarterly Journal of Hospital Medicine*. 2012;22(4):245-8.
9. Brown J, Martis R, Hughes B, Rowan J, Crowther CA. Oral anti-diabetic pharmacological therapies for the treatment of women with gestational diabetes. *Cochrane Database of Systematic Reviews*. 2017;1:CD011967.
10. Chou HS, Truitt KE, Moberly JB, Merante D, Choi Y, Mun Y, et al. A 26-week, placebo- and pioglitazone-controlled monotherapy study of rivoglitazone in subjects with type 2 diabetes mellitus. *Diabetes, Obesity & Metabolism*. 2012;14(11):1000-9.
11. De Caterina R, Andersson U, Alexander JH, Al-Khatib SM, Bahit MC, Goto S, et al. History of bleeding and outcomes with apixaban versus warfarin in patients with atrial fibrillation in the Apixaban for Reduction in Stroke and Other Thromboembolic Events in Atrial Fibrillation trial. *American Heart Journal*. 2016;175:175-83.

12. De Luca G, Michael Gibson C, Bellandi F, Murphy S, Maioli M, Noc M, et al. Benefits of pharmacological facilitation with glycoprotein IIb-IIIa inhibitors in diabetic patients undergoing primary angioplasty for STEMI. A subanalysis of the EGYPT cooperation. *Journal of Thrombosis & Thrombolysis*. 2009;28(3):288-98.
13. El-Fattah AAA, Hamed MI, Sadek SE, Abu-Elhana AS. Insulin resistance in type II diabetes mellitus with liver cirrhosis. *Global journal of pharmacology*. 2013;7(2):109- 17.
14. Fullerton B, Siebenhofer A, Jeitler K, Horvath K, Semlitsch T, Berghold A, et al. Short-acting insulin analogues versus regular human insulin for adults with type 1 diabetes mellitus. *Cochrane Database of Systematic Reviews*. 2016(6):CD012161.
15. Gessler N, Labhard ND, Stolt P, Manga E, Balo JR, Boffolo A, et al. The lesson of Monsieur Nouma: effects of a culturally sensitive communication tool to improve health-seeking behavior in rural Cameroon. *Patient Education & Counseling*. 2012;87(3):343-50.
16. Ibrahim MA, Sarhan, II, Halawa MR, Afify EN, Hebah HA, Al-Gohary EA, et al. Study of the effect of vitamin D supplementation on glycemic control in type 2 diabetic prevalent hemodialysis patients. *Hemodialysis international*. 2015;19:S11- S9.
17. Jingi AM, Noubiap JJ, Essouma M, Bigna JJ, Nansseu JR, Ellong A, et al. Association of insulin treatment versus oral hypoglycaemic agents with diabetic retinopathy and its severity in type 2 diabetes patients in Cameroon, sub-Saharan Africa. *Annals of Translational Medicine*. 2016;4(20):395.
18. Kadiri A, Al-Nakhi A, El-Ghazali S, Jabbar A, Al Arouj M, Akram J, et al. Treatment of type 1 diabetes with insulin lispro during Ramadan. *Diabetes & metabolism*. 2001;27(4 Pt 1):482- 6.
19. Kamau RK, Maina FW, Kigundu C, Mati JK. The effect of low-oestrogen combined pill, progestogen-only pill and medroxyprogesterone acetate on oral glucose tolerance test. *East African Medical Journal*. 1990;67(8):550-5.
20. Moghazy AM, Shams ME, Adly OA, Abbas AH, El-Badawy MA, Elsakka DM, et al. The clinical and cost effectiveness of bee honey dressing in the treatment of diabetic foot ulcers. *Diabetes Research & Clinical Practice*. 2010;89(3):276-81.
21. Notelovitz M. Sulphonylurea therapy in the treatment of the pregnant diabetic. *South African Medical Journal Suid-Afrikaanse Tydskrif Vir Geneeskunde*. 1971;45(9):226-9.
22. Osman H, Khamis O, Elfeky M, El Amin Ali A, Abdelwahed M. Effect of short-term erythropoietin therapy on insulin resistance and serum levels of leptin and neuropeptide y in hemodialysis patients. *Indian journal of endocrinology and metabolism*. 2017;21(5):724- 30.
23. Razak A, Isaacs AA. Implementation and evaluation of a weight-reduction programme for diabetic patients at a primary health care facility in the western cape: a pilot study. *South african family practice*. 2017;59(6):189- 94.

- 1  
2  
3 24. Schumm-Draeger PM, Burgess L, Koranyi L, Hrubá V, Hamer-Maansson JE, de Bruin  
4 TW. Twice-daily dapagliflozin co-administered with metformin in type 2 diabetes: a 16-week  
5 randomized, placebo-controlled clinical trial. *Diabetes, Obesity & Metabolism*. 2015;17(1):42-  
6 51.  
7  
8  
9 25. Speechly DP, Buffenstein R. Appetite dysfunction in obese males: evidence for role of  
10 hyperinsulinaemia in passive overconsumption with a high fat diet. *European journal of*  
11 *clinical nutrition*. 2000;54(3):225- 33.  
12  
13 26. Todowede OO, Sartorius B. Prevalence of metabolic syndrome, discrete or comorbid  
14 diabetes and hypertension in sub-Saharan Africa among people living with HIV versus HIV-  
15 negative populations: a systematic review and meta-analysis protocol. *BMJ Open*.  
16 2017;7(7):e016602.  
17  
18 27. Van Olmen J, Van Pelt M, Malombo B, Ku GM, Kanda D, Heang H, et al. Process  
19 evaluation of a mobile health intervention for people with diabetes in low income countries -  
20 the implementation of the TEXT4DSM study. *Journal of Telemedicine & Telecare*.  
21 2017;23(1):96-105.  
22  
23 28. Werfalli M, Raubenheimer P, Engel M, Peer N, Kalula S, Kengne AP, et al.  
24 Effectiveness of community-based peer-led diabetes self-management programmes (COMP-  
25 DSMP) for improving clinical outcomes and quality of life of adults with diabetes in primary  
26 care settings in low and middle-income countries (LMIC): a systematic review and meta-  
27 analysis. *BMJ Open*. 2015;5(7):e007635.  
28  
29  
30  
31  
32  
33  
34

### 1.2.2 Other population (32 references)

- 35  
36 1. Ali Hassan H, El-Gezeiry D, Nafaa TM, Baghdady I. Improved responsiveness of  
37 PCOS patients to clomiphene after CYP17a inhibitor. *Journal of assisted reproduction and*  
38 *genetics*. 2001;18(11):608- 11.  
39  
40 2. Amador-Licona N, Guízar-Mendoza J, Vargas E, Sánchez-Camargo G, Zamora-Mata  
41 L. The short-term effect of a switch from glibenclamide to metformin on blood pressure and  
42 microalbuminuria in patients with type 2 diabetes mellitus. *Archives of medical research*.  
43 2000;31(6):571- 5.  
44  
45 3. Ashoush S, Abou-Gamrah A, Bayoumy H, Othman N. Chromium picolinate reduces  
46 insulin resistance in polycystic ovary syndrome: randomized controlled trial. *Journal of*  
47 *obstetrics and gynaecology research*. 2016;42(3):279- 85.  
48  
49 4. Ashtary-Larky D, Ghanavati M, Lamuchi-Deli N, Payami SA, Alavi-Rad S,  
50 Boustaninejad M, et al. Rapid Weight Loss vs. slow weight loss: which is more effective on  
51 body composition and metabolic risk factors? *International journal of endocrinology and*  
52 *metabolism*. 2017;15(3) (no pagination).  
53  
54  
55  
56  
57  
58  
59  
60



- 1  
2  
3 5. 6. Bashandy GMN, Boules NS, Taha FM. Effects of a single preoperative dose of  
4 N(2)-L-alanyl-L-glutamine on insulin resistance and plasma glutathione levels in the early  
5 postoperative period. *Egyptian journal of anaesthesia*. 2013;29(4):319- 24.
- 6  
7 6. Bays HE, Evans JL, Maki KC, Evans M, Maquet V, Cooper R, et al. Chitin-glucan  
8 fiber effects on oxidized low-density lipoprotein: a randomized controlled trial. *European*  
9 *Journal of Clinical Nutrition*. 2013;67(1):2-7.
- 10  
11 7. Belinova L, Kahleova H, Malinska H, Topolcan O, Windrichova J, Oliyarnyk O, et al.  
12 The effect of meal frequency in a reduced-energy regimen on the gastrointestinal and  
13 appetite hormones in patients with type 2 diabetes: a randomised crossover study. *Plos one*.  
14 2017;12(4):e0174820.
- 15  
16 8. Campbell-Tofte JI, Mølgaard P, Josefsen K, Abdallah Z, Hansen SH, Cornett C, et al.  
17 Randomized and double-blinded pilot clinical study of the safety and anti-diabetic efficacy of  
18 the Rauwolfia-Citrus tea, as used in Nigerian traditional medicine. *Journal of*  
19 *ethnopharmacology*. 2011;133(2):402- 11.10.
- 20  
21 9. El-Haggag SM, Mostafa TM. Comparative clinical study between the effect of  
22 fenofibrate alone and its combination with pentoxifylline on biochemical parameters and liver  
23 stiffness in patients with non-alcoholic fatty liver disease. *Hepatology international*.  
24 2015;9(3):471- 9.
- 25  
26 10. Gupta V, Keshari BB, Tiwari SK, Murthy K. A comparative study of Shilajatu and  
27 Asanadi Ghana Vati in the management of Madhumeha w.s.r. to type-2 diabetes mellitus.  
28 *Ayu*. 2016;37(2):120-4.
- 29  
30 11. Hashim HA, Lakany NE, Sherief L. Combined metformin and clomiphene citrate  
31 versus laparoscopic ovarian diathermy for ovulation induction in clomiphene-resistant women  
32 with polycystic ovary syndrome: a randomized controlled trial. *Journal of obstetrics and*  
33 *gynaecology research*. 2011;37(3):169- 77.
- 34  
35 12. Home PD, Bolli GB, Mathieu C, Deerochanawong C, Landgraf W, Candelas C, et al.  
36 Modulation of insulin dose titration using a hypoglycaemia-sensitive algorithm: insulin  
37 glargine versus neutral protamine Hagedorn insulin in insulin-naive people with type 2  
38 diabetes. *Diabetes, Obesity & Metabolism*. 2015;17(1):15-22.
- 39  
40 13. Ismail NA, Ragab S, Abd El Baky ANE, Hamed M, Ibrahim ASA. Effect of oral  
41 curcumin administration on insulin resistance, serum resistin and fetuin-A in obese children:  
42 randomized placebo-controlled study. *Research journal of pharmaceutical, biological and*  
43 *chemical sciences*. 2014;5(1):887- 96.
- 44  
45 14. Kumari J, Mehta CS, Shukla VD, Dave AR, Shingala TM. A comparative clinical study  
46 of Nyagrodhadi Ghanavati and Virechana Karma in the management of Madhumeha. *Ayu*.  
47 2010;31(3):300-4.
- 48  
49  
50  
51  
52  
53  
54  
55  
56  
57  
58  
59  
60

15. Malin SK, Hinnerichs KR, Echtenkamp BG, Evetovich TK, Engebretsen BJ. Effect of adiposity on insulin action after acute and chronic resistance exercise in non-diabetic women. *European journal of applied physiology*. 2013;113(12):2933- 41.
16. Malin SK, Kullman EL, Scelsi AR, Haus JM, Filion J, Pagadala MR, et al. A whole-grain diet reduces peripheral insulin resistance and improves glucose kinetics in obese adults: a randomized-controlled trial. *Metabolism: clinical and experimental*. 2018;82:111- 7.
17. Malin SK, Niemi N, Solomon TP, Haus JM, Kelly KR, Filion J, et al. Exercise training with weight loss and either a high- or low-glycemic index diet reduces metabolic syndrome severity in older adults. *Annals of nutrition & metabolism*. 2012;61(2):135- 41.
18. Manaf A, Tjandrawinata RR, Malinda D. Insulin sensitizer in prediabetes: a clinical study with DLBS3233, a combined bioactive fraction of *Cinnamomum burmanii* and *Lagerstroemia speciosa*. *Drug design, development and therapy*. 2016;10:1279- 89.
19. Mendez-Del Villar M, Gonzalez-Ortiz M, Martinez-Abundis E, Perez-Rubio KG, Cortez-Navarrete M. Effect of *Irvingia gabonensis* on Metabolic Syndrome, Insulin Sensitivity, and Insulin Secretion. *Journal of Medicinal Food*. 2018;21(6):568-74.
20. Mogharnasi M, TaheriChadorneshin H, Papoli-Baravati SA, Teymuri A. Effects of upper-body resistance exercise training on serum nesfatin-1 level, insulin resistance, and body composition in obese paraplegic men. *Disability and health journal*. 2018;(no pagination).
21. Nadkarni MA, Vyas SN, Baghel MS, Ravishankar B. Randomized placebo-controlled trial of Mustadi Ghanavati in hyperlipidemia. *Ayu*. 2010;31(3):287-93.
22. Ngo-Matip ME, Pieme CA, Azabji-Kenfack M, Biapa PC, Germaine N, Heike E, et al. Effects of *Spirulina platensis* supplementation on lipid profile in HIV-infected antiretroviral naïve patients in Yaounde-Cameroon: a randomized trial study. *Lipids in health and disease*. 2014;13:191.
23. Ngondi JL, Etoundi BC, Nyangono CB, Mbofung CM, Oben JE. IGOB131, a novel seed extract of the West African plant *Irvingia gabonensis*, significantly reduces body weight and improves metabolic parameters in overweight humans in a randomized double-blind placebo controlled investigation. *Lipids in health and disease*. 2009;8:7.
24. Philis-Tsimikas A, Del Prato S, Satman I, Bhargava A, Dharmalingam M, Skjoth TV, et al. Effect of insulin degludec versus sitagliptin in patients with type 2 diabetes uncontrolled on oral antidiabetic agents. *Diabetes, Obesity & Metabolism*. 2013;15(8):760-6.
25. Pieber TR, Treichel HC, Hompesch B, Philotheou A, Mordhorst L, Gall MA, et al. Comparison of insulin detemir and insulin glargine in subjects with Type 1 diabetes using intensive insulin therapy. *Diabetic Medicine*. 2007;24(6):635-42.

- 1  
2  
3 26. Rizk AY, Bedaiwy MA, Al-Inany HG. N-acetyl-cysteine is a novel adjuvant to  
4 clomiphene citrate in clomiphene citrate-resistant patients with polycystic ovary syndrome.  
5 *Fertility and sterility*. 2005;83(2):367- 70.  
6  
7 27. Rost NS, Giugliano RP, Ruff CT, Murphy SA, Crompton AE, Norden AD, et al.  
8 Outcomes With Edoxaban Versus Warfarin in Patients With Previous Cerebrovascular  
9 Events: Findings From ENGAGE AF-TIMI 48 (Effective Anticoagulation With Factor Xa Next  
10 Generation in Atrial Fibrillation-Thrombolysis in Myocardial Infarction 48). *Stroke*.  
11 2016;47(8):2075-82.  
12  
13 28. Shabana W, Teleb M, Dawod T, Abu Taha H, Abdulla A, Shahin A, et al. Outcome of  
14 alpha-blockers, with or without methylprednisolone combination, in medical expulsive therapy  
15 for lower ureteric stones: a prospective randomised study. *Arab journal of urology*.  
16 2016;14(1):7- 11.  
17  
18 29. Strojek K, Yoon KH, Hrubá V, Sugg J, Langkilde AM, Parikh S. Dapagliflozin Added  
19 to Glimpiride in Patients with Type 2 Diabetes Mellitus Sustains Glycemic Control and  
20 Weight Loss Over 48 Weeks: a Randomized, Double-Blind, Parallel-Group, Placebo-  
21 Controlled Trial. *Diabetes therapy*. 2014;5(1):267- 83.  
22  
23 30. Timmers S, De Ligt M, Phielix E, Van De Weijer T, Hansen J, Moonen-Kornips E, et  
24 al. Resveratrol as add-on therapy in subjects with well-controlled type 2 diabetes: a  
25 randomized controlled trial. *Diabetes care*. 2016;39(12):2211- 7.  
26  
27 31. Van Olmen J, Kegels G, Korachais C, de Man J, Van Acker K, Kalobu JC, et al. The  
28 effect of text message support on diabetes self-management in developing countries - A  
29 randomised trial. *Journal of Clinical & Translational Endocrinology*. 2017;7:33-41.  
30  
31 32. Vázquez C, Botella-Carretero JI, Corella D, Fiol M, Lage M, Lurbe E, et al. White fish  
32 reduces cardiovascular risk factors in patients with metabolic syndrome: the WISH-CARE  
33 study, a multicenter randomized clinical trial. *Nutrition, metabolism, and cardiovascular  
34 diseases : NMCD*. 2014;24(3):328- 35.  
35  
36  
37

### 1.2.3 Other intervention (8 references)

- 38  
39  
40  
41  
42  
43  
44  
45 1. Babiker R, Elmusharaf K, Keogh MB, Saeed AM. Effect of Gum Arabic (Acacia  
46 Senegal) supplementation on visceral adiposity index (VAI) and blood pressure in patients  
47 with type 2 diabetes mellitus as indicators of cardiovascular disease (CVD): a randomized  
48 and placebo-controlled clinical trial. *Lipids in Health & Disease*. 2018;17(1):56.  
49  
50 2. Dirajlal-Fargo S, Musiime V, Cook A, Mirembe G, Kenny J, Jiang Y, et al. Insulin  
51 Resistance and Markers of Inflammation in HIV-infected Ugandan Children in the CHAPAS-3  
52 Trial. *Pediatric infectious disease journal*. 2017;36(8):761- 7.  
53  
54 3. Djoumessi RN, Noubiap JJ, Kaze FF, Essouma M, Menanga AP, Kengne AP, et al.  
55 Effect of low-dose spironolactone on resistant hypertension in type 2 diabetes mellitus: a  
56  
57  
58  
59  
60

1  
2  
3 randomized controlled trial in a sub-Saharan African population. *BMC Research Notes*.  
4 2016;9:187.

5  
6 4. Elnashar A, Fahmy M, Mansour A, Ibrahim K. N-acetyl cysteine vs. metformin in  
7 treatment of clomiphene citrate-resistant polycystic ovary syndrome: a prospective  
8 randomized controlled study. *Fertility and sterility*. 2007;88(2):406- 9.

9  
10 5. Elseddek M-EA, Elgindy E. Comparison between two clomiphene citrate protocols for  
11 induction of ovulation in clomiphene resistant polycystic ovary syndrome. *Middle east fertility*  
12 *society journal*. 2014;19(4):243- 7.

13  
14 6. Gopalan A, Paramanund J, Shaw PA, Patel D, Friedman J, Brophy C, et al.  
15 Randomised controlled trial of alternative messages to increase enrolment in a healthy food  
16 programme among individuals with diabetes. *BMJ Open*. 2016;6(11):e012009.

17  
18 7. Onyechi KC, Eseadi C, Okere AU, Onuigbo LN, Umoke PC, Anyaegbunam NJ, et al.  
19 Effects of cognitive behavioral coaching on depressive symptoms in a sample of type 2  
20 diabetic inpatients in Nigeria. *Medicine*. 2016;95(31):e4444.

21  
22 8. Shehata M, Hamza M. Impact of high loading dose of atorvastatin in diabetic patients  
23 with renal dysfunction undergoing elective percutaneous coronary intervention: a randomized  
24 controlled trial. *Cardiovascular therapeutics*. 2015;33(2):35-41.

#### 25 **1.2.4 Other comparison (1 reference)**

26  
27 1. Ahmed ME, Mohammed MS, Mahadi SI. Primary wound closure of diabetic foot  
28 ulcers by debridement and stitching. *Journal of Wound Care*. 2016;25(11):650-4.

#### 29 **1.2.5 Other outcome (7 references)**

30  
31 1. Belkhadir J, el Ghomari H, Klocker N, Mikou A, Nasciri M, Sabri M. Muslims with non-  
32 insulin dependent diabetes fasting during Ramadan: treatment with glibenclamide. *BMJ*.  
33 1993;307(6899):292-5.

34  
35 2. El-Tamalawy MM, Ibrahim OM, Hassan TM, El-Barbari AA. Effect of Combination  
36 Therapy of Ezetimibe and Atorvastatin on Remnant Lipoprotein Versus Double Atorvastatin  
37 Dose in Egyptian Diabetic Patients. *Journal of Clinical Pharmacology*. 2018;58(1):34-41.

38  
39 3. Hassanien M, Elawamy A, Kamel EZ, Khalifa WA, Abolfadl GM, Roushdy ASI, et al.  
40 Perineural Platelet-Rich Plasma for Diabetic Neuropathic Pain, Could It Make a Difference?  
41 *Pain Medicine*. 2020;21(4):757-65.

42  
43 4. Lakhdar N, Denguezli M, Zaouali M, Zbidi A, Tabka Z, Bouassida A. Diet and diet  
44 combined with chronic aerobic exercise decreases body fat mass and alters plasma and  
45 adipose tissue inflammatory markers in obese women. *Inflammation*. 2013;36(6):1239- 47.

46  
47 5. Marais C, Hall DR, van Wyk L, Conradie M. Randomized cross-over trial comparing  
48 the diagnosis of gestational diabetes by oral glucose tolerance test and a designed breakfast  
49 glucose profile. *International Journal of Gynaecology & Obstetrics*. 2018;141(1):85-90.

1  
2  
3 6. Saied GM, Kamel RM, Labib AM, Said MT, Mohamed AZ. The diabetic foot and leg:  
4 combined He-Ne and infrared low-intensity lasers improve skin blood perfusion and prevent  
5 potential complications. A prospective study on 30 Egyptian patients. *Lasers in Medical*  
6 *Science*. 2011;26(5):627-32.

7  
8  
9 7. Tawfik MY. The Impact of Health Education Intervention for Prevention and Early  
10 Detection of Type 2 Diabetes in Women with Gestational Diabetes. *Journal of Community*  
11 *Health*. 2017;42(3):500-10.

## 14 1.2.6

### 15 1.2.7 Other publications (41 references)

16  
17 1. Agbozo F, Abubakari A, Narh C, Jahn A. Are we missing pregnant women with  
18 gestational diabetes? Evidence from a diagnostic accuracy study comparing glycosuria,  
19 glycated haemoglobin, random and fasting glucose to oral glucose tolerance test. *Tropical*  
20 *medicine and international health Conference: 10th european congress on tropical medicine*  
21 *and international health Belgium*. 2017;22(Supplement 1):351- 2.

22  
23 2. Anyanwu AC, Fasanmade OA, Coker HB, Ohwovoriole AE. Vitamin D  
24 supplementation improves glycaemia in Vitamin D deficient nigerians with diabetes mellitus.  
25 *Endocrine reviews Conference: 96th annual meeting and expo of the endocrine society,*  
26 *ENDO 2014 Chicago, IL united states Conference start: 20140621 Conference end:*  
27 *20140624 Conference publication: (varpagings)*. 2014;35(no pagination).

28  
29 3. Aronson R, Cohen O, Conget I, Runzis S, Castaneda J, de Portu S, et al. OpT2mise:  
30 a randomized controlled trial to compare insulin pump therapy with multiple daily injections in  
31 the treatment of type 2 diabetes-research design and methods. *Diabetes Technology &*  
32 *Therapeutics*. 2014;16(7):414-20.

33  
34 4. Azar ST, Echtay A, Wan Bebakar WM, Alaraj S, Berrah A, Omar M, et al. Efficacy and  
35 safety of liraglutide versus sulfonylurea both in combination with metformin during ramadan  
36 in subjects with type 2 diabetes (lira-ramadan): a randomized trial. *Journal of endocrinology,*  
37 *metabolism and diabetes of south africa Conference: 51st congress of the society for*  
38 *endocrinology, metabolism and diabetes of south africa, SEMDSA 2016 South africa.*  
39 *2016;21(1):14.*

40  
41 5. Balde N, Camara A, Sobngwi-Tambekou J, Balti EV, Tchatchoua A, Fezeu L, et al.  
42 Improving access to HbA1c in sub-Saharan Africa (IA3) cohort: cohort profile. *The Pan*  
43 *African Medical Journal*. 2017;27.

44  
45 6. Chi CT. A Multicenter, randomized, double-blind, positive controlled clinical study to  
46 assess the efficacy and safety of Acetyl L-Carnitine in the treatment of diabetic peripheral  
47 neuropathy. *Chictr*. 2008.

- 1  
2  
3 7. Elnashar A, El Maghraby H, Nafee T, Guiziry D, Fourtia I. Randomized controlled trial  
4 of the effects of metformin versus combined oral contraceptives in adolescent PCOS women  
5 through a 24 months follow up period. *Human reproduction*. 2015;30:i5.
- 6  
7 8. Evans JL, Bays H, Maki KC, Evans M, Maquet V, Cooper R, et al. Chitin-glucan fiber  
8 effects on oxidized low-density lipoprotein: a randomized controlled trial. *Circulation*.  
9 2012;125(10 SUPPL. 1).
- 10  
11 9. Goedecke JH, Mendham AE, Clamp L, Nono Nankam PA, Fortuin-de Smidt MC, Phiri  
12 L, et al. An Exercise Intervention to Unravel the Mechanisms Underlying Insulin Resistance  
13 in a Cohort of Black South African Women: Protocol for a Randomized Controlled Trial and  
14 Baseline Characteristics of Participants. *JMIR Research Protocols*. 2018;7(4):e75.
- 15  
16 10. Lanasri N, Nibouche NW, Atif L, Makhoul L, Zeraouia F, Hansal F, et al. Comparison  
17 of two therapeutic education methods in diabetic patients: a randomised controlled trial.  
18 *Diabetologia Conference: 54th annual meeting of the european association for the study*  
19 *diabetes, EASD 2018 Germany*. 2018;61(Supplement 1):S433.
- 20  
21 11. Malin SK, Louis-Kullman E, Scelsi AR, Haus JM, Filion J, Godin JP, et al. Whole grain  
22 diet improves glucose tolerance, insulin sensitivity, and beta-cell function in overweight  
23 prediabetic adults. *Diabetes*. 2014;63:A78.
- 24  
25 12. Malin SK, Samat A, Wolski K, Abood B, Pothier C, Bhatt DL, et al. Gastric bypass  
26 surgery enhances ghrelin suppression and improves beta-cell function and central obesity at  
27 24 months in moderately obese adults with type 2 diabetes. *Diabetes*. 2013;62:A729.
- 28  
29 13. Mash B, Levitt N, Steyn K, Zwarenstein M, Rollnick S. Effectiveness of a group  
30 diabetes education programme in underserved communities in South Africa: pragmatic  
31 cluster randomized control trial. *BMC Family Practice*. 2012;13:126.
- 32  
33 14. Mwangi N, Bascaran C, Ng'ang'a M, Ramke J, Kipturgo M, Gichuhi S, et al. Feasibility  
34 of a cluster randomized controlled trial on the effectiveness of peer-led health education  
35 interventions to increase uptake of retinal examination for diabetic retinopathy in Kirinyaga,  
36 Kenya: a pilot trial. *Pilot feasibility stud*. 2020;6:102.
- 37  
38 15. Mwangi N, Bascaran C, Ramke J, Kipturgo M, Kim M, Ng'ang'a M, et al. Peer-support  
39 to increase uptake of screening for diabetic retinopathy: process evaluation of the DURE  
40 cluster randomized trial. *Tropical Medicine & Health*. 2020;48:1.
- 41  
42 16. Mwangi N, Ng'ang'a M, Gakuo E, Gichuhi S, Macleod D, Moorman C, et al.  
43 Effectiveness of peer support to increase uptake of retinal examination for diabetic  
44 retinopathy: study protocol for the DURE pragmatic cluster randomized clinical trial in  
45 Kirinyaga, Kenya. *BMC Public Health*. 2018;18(1):871.
- 46  
47 17. Nassar WF, El-Ansary M, Shehab T, Abdelhameed M, Saad A, Esa W, et al. Effect of  
48 cell-free mesenchymal stem cells microvesicles (MVS) and exosomes therapy on beta-cell  
49 mass in type 1 diabetes mellitus (T1DM). *Diabetes*. 2015;64:A282.
- 50  
51  
52  
53  
54  
55  
56  
57  
58  
59  
60

- 1  
2  
3 18. Nct. The Efficacy of Specialist Collaboration and Mobile Screening for Improving the  
4 Management of Diabetes. <https://clinicaltrials.gov/show/nct01275040>. 2010.
- 5  
6 19. Nct. Trial on an Educative Structured Intervention by Peer Educators to Improve  
7 HbA1c of Patients With Type 2 Diabetes in the Sikasso Region in Mali.  
8 <https://clinicaltrials.gov/show/nct01153048>. 2010.
- 9  
10 20. Nct. Propolis Improves Glycemic Control in Subjects With Type 2 Diabetes and  
11 Chronic Periodontitis. <https://clinicaltrials.gov/show/nct02794506>. 2016.
- 12  
13 21. Nct. Community- and mHealth-Based Integrated Management of Diabetes in Primary  
14 Healthcare in Rwanda. <https://clinicaltrials.gov/show/nct03376607>. 2017.
- 15  
16 22. Nct. Nutrition Education Intervention for Adults With Type 2 Diabetes.  
17 <https://clinicaltrials.gov/show/nct03334773>. 2017.
- 18  
19 23. Nct. Helium-Neon Laser Therapy Versus Infrared Laser Therapy in Treating Patients  
20 With Diabetic Foot Ulcer. <https://clinicaltrials.gov/show/nct03338517>. 2017.
- 21  
22 24. Nct. Diabetes Self-Management Education (DSME) and Its Effect on Clinical,  
23 Psychosocial, and Behavioral Outcomes. <https://clinicaltrials.gov/show/nct03185689>. 2017.
- 24  
25 25. Noakes TD. The Women's health initiative randomized controlled dietary modification  
26 trial: an inconvenient finding and the diet-heart hypothesis. *South african medical journal*.  
27 2013;103(11):824- 5.
- 28  
29 26. Orchard TJ, Sibomana L, Miller R. Evaluation of differing type 1 diabetes treatment  
30 regimens in youth in Rwanda. *Pediatric diabetes*. 2014;15:25- 6.
- 31  
32 27. Pengpid S, Peltzer K, Skaal L. Efficacy of a church-based lifestyle intervention  
33 programme to control high normal blood pressure and/or high normal blood glucose in  
34 church members: a randomized controlled trial in Pretoria, South Africa. *BMC Public Health*.  
35 2014;14:568.
- 36  
37 28. Rockers PC, Wirtz VJ, Vian T, Onyango MA, Ashigbie PG, Laing R. Study protocol for  
38 a cluster-randomised controlled trial of an NCD access to medicines initiative: evaluation of  
39 Novartis Access in Kenya. *BMJ Open*. 2016;6(11):e013386.
- 40  
41 29. Ross SM. African mango (IGOB131): a proprietary seed extract of *Irvingia*  
42 *gabonensis* is found to be effective in reducing body weight and improving metabolic  
43 parameters in overweight humans. *Holistic nursing practice*. 2011;25(4):215- 7.
- 44  
45 30. Salman SA, Farghaly TA, Attallah DA, Abdel-Hafeez HA, Shaaban OM. Insulin  
46 sensitizing agent (metformin) improves clinical pregnancy rate in clomiphene citrate resistant  
47 polycystic ovarian syndrome patients with acanthosis nigricans. *Fertility and sterility*.  
48 2014;102(3 SUPPL. 1):e139.
- 49  
50 31. Samir Elbarbary N, Abdel Rahman Ismail E, El-Naggar AR, Hany Hamouda M, El-  
51 Hamamsy M. Role of carnosine as an adjuvant therapy for diabetic nephropathy in children  
52 and adolescents with type 1 diabetes: relation to oxidative stress, renal functional integrity  
53  
54  
55  
56  
57  
58  
59  
60

1  
2  
3 and glycaemic control. Pediatric diabetes Conference: 43rd annual meeting of the  
4 international society for pediatric and adolescent diabetes , ISPAD 2017 Austria.  
5 2017;18(Supplement 25):115.  
6

7  
8 32. Sherif EM, El Tonbary KY, Abd Aziz MM. Comparative study between the use of  
9 insulin glargine and intermediate acting insulin (NPH) in type 1 diabetic children less than  
10 eight years old. *Pediatric diabetes*. 2014;15:46.  
11

12 33. Sibomana L, Rwabufigiri B, Kaberuka V, Gishoma C, Rubanzana W, Miller RG, et al.  
13 Type 1 diabetes-related quality of life in Rwanda. *Diabetes*. 2015;64:A368.  
14

15 34. Utz B, Assarag B, Essolbi A, Barkat A, El Ansari N, Fakhir B, et al. Improving  
16 detection and initial management of gestational diabetes through the primary level of care in  
17 Morocco: protocol for a cluster randomized controlled trial. *Reproductive Health*.  
18 2017;14(1):75.  
19

20 35. van Olmen J, Ku GM, van Pelt M, Kalobu JC, Hen H, Darras C, et al. The  
21 effectiveness of text messages support for diabetes self-management: protocol of the  
22 TEXT4DSM study in the democratic Republic of Congo, Cambodia and the Philippines. *BMC*  
23 *Public Health*. 2013;13:423.  
24

25 36. Vedanthan R, Kamano JH, Lee H, Andama B, Bloomfield GS, DeLong AK, et al.  
26 Bridging Income Generation with Group Integrated Care for cardiovascular risk reduction:  
27 rationale and design of the BIGPIC study. *American heart journal*. 2017;188:175- 85.  
28

29 37. Veleba J, Janovska P, Kuda O, Horakova O, Malinska H, Kazdova L, et al. Combined  
30 intervention with pioglitazone and N-3 fatty acids in metformin-treated diabetic patients.  
31 *Obesity facts*. 2015;8:213.  
32

33 38. Viviers C, Van Rooijen AJ. Daily physical activity and diet intervention for individuals  
34 with type 2 diabetes mellitus: a randomised controlled trial. *South african journal of clinical*  
35 *nutrition*. 2010;23(3 SUPPL. 2):S35.  
36

37 39. Wargny M, Kleinebreil L, Diop SN, Ndour-Mbaye M, Ba Diop M, Balkau B, et al. SMS-  
38 based intervention in type 2 diabetes: clinical trial in Senegal. *BMJ innovations*. 2018.  
39

40 40. Zeghari L, Aboussaleh Y. Comparison of two approaches of nutritional education in  
41 the management of diabetes. *Annals of nutrition and metabolism Conference: 21st*  
42 *international congress of nutrition, ICN 2017 Argentina*. 2017;71(Supplement 2):903- 4.  
43

44 41. Zennaki A, Niar S, Naceur M, Aichaoui H, Ouzzaa K, Aoui A, et al. Effect of  
45 paramedical treatment codified on balance, quality of life and knowledge of teenagers  
46 suffering from T1DM persisting imbalance. *Pediatric diabetes ( varpagings)*. 2015;16:89.  
47  
48  
49  
50  
51  
52  
53  
54  
55  
56  
57  
58  
59  
60



### Studies on patients with pre-DM

| Study name                                                  | Setting                            | Population                                                                                                                                                                                                                                                                                                                                                                                    | Intervention vs. Control                                                                                                          | Outcomes                                                                                                                                                                                                                                                                                                 | Results                                                                                   |                                                                                                                                                                                                                                                                                                            |
|-------------------------------------------------------------|------------------------------------|-----------------------------------------------------------------------------------------------------------------------------------------------------------------------------------------------------------------------------------------------------------------------------------------------------------------------------------------------------------------------------------------------|-----------------------------------------------------------------------------------------------------------------------------------|----------------------------------------------------------------------------------------------------------------------------------------------------------------------------------------------------------------------------------------------------------------------------------------------------------|-------------------------------------------------------------------------------------------|------------------------------------------------------------------------------------------------------------------------------------------------------------------------------------------------------------------------------------------------------------------------------------------------------------|
| registration number Design                                  | Place, setting and time            | Inclusion / Exclusion criteria Characteristics                                                                                                                                                                                                                                                                                                                                                | Description with duration                                                                                                         | Primary and secondary                                                                                                                                                                                                                                                                                    | Longest follow-up period with intervention effects (IG vs. CG) with SD, 95%-CI or p value |                                                                                                                                                                                                                                                                                                            |
| <b>Strategies to enhance physical activity</b>              |                                    |                                                                                                                                                                                                                                                                                                                                                                                               |                                                                                                                                   |                                                                                                                                                                                                                                                                                                          |                                                                                           |                                                                                                                                                                                                                                                                                                            |
| <b>RezkAllah 2019</b><br>ACTRN126170<br>00631303<br>RCT     | Egypt, urban<br>07/2017-01/2018    | Pre-DM, 25-45 yrs, BMI of 25–30 kg/m <sup>2</sup> , HbA1C 5.7–6.4%, fasting glucose 100–125 mg/dL, sedentary lifestyle<br><br>No history of diabetes, cancer, prediabetic neuropathy, stroke, pulmonary embolism, or severe musculoskeletal problems restricting physical activity                                                                                                            | n=60<br>45 % females<br>age (yrs): 32.9±5.5<br>BMI (kg/m <sup>2</sup> ): 28.3±1.4                                                 | <u>IG2 (n=20):</u><br>High-volume high intensity interval training, 40 min/session<br><br><u>IG1 (n=20):</u><br>Low-volume high intensity interval training, 25 min/session<br>Both with 90 % HR maximum, 3 times/week<br><br><u>CG (n=20):</u><br>No exercise intervention<br><u>Duration:</u> 12 weeks | <u>Primary:</u> HbA1c<br><u>Other:</u> fasting glucose                                    | After 3 months<br><u>HbA1c (%):</u><br>Benefit for IG2 and IG1: Benefit for IG: 4.87±0.34 (-26 %) vs. 5.13±0.57 (-14.5 %) vs. 6.25±0.48 (+3.38 %) (p=0.0001)<br><u>fasting glucose (mg/dL):</u><br>Benefit for IG2 and IG1: 90.8±4.13 (-17.8 %) vs. 93.8±4.16 (-13.2 %) vs. 103.8±7.21 (+2.9 %) (p=0.0001) |
| <b>Strategies on nutrition</b>                              |                                    |                                                                                                                                                                                                                                                                                                                                                                                               |                                                                                                                                   |                                                                                                                                                                                                                                                                                                          |                                                                                           |                                                                                                                                                                                                                                                                                                            |
| <b>Krawinkel 2018</b><br>DRKS<br>00005131<br>Cross-over-RCT | Tanzania, urban<br>10/2013-03/2014 | Individuals with pre-DM age (yrs): 30 -65, FPG 5.6-6.9 mmol/l (100–125 mg/dL) on 2 days or on one day + HbA1c 5.7-7.5 %, BMI 27–35 kg/m <sup>2</sup> , BP 90/60-160/110 mmHg, waist circumference > 80/90 cm for women / men<br><br>No chronic disease, taking regular intake of medication, identified glucose-6-phosphatase-dehydrogenase deficiency, heavy alcohol consumption, pregnancy, | n=52<br>55% female<br>age (yrs): 47.5±8.7<br>HbA1c (%):5.85±0.43<br>FPG: (mmol/l): 5.34±0.49<br>BMI (kg/m <sup>2</sup> ):29.6±2.2 | <u>IG/CG (n=30):</u><br>started with bitter gourd supplementation (2,5 g) over 8 wks, followed by placebo over 8 wks<br><br>vs.<br><u>CG/IG (n=31):</u><br>first placebo over 8 wks, followed by bitter gourd over 8 wks<br>washout period: 4 wks<br><u>Duration</u> 8 weeks                             | <u>Primary:</u><br>FPG<br><u>Secondary:</u><br>HbA1c, Insulin, SBP, DBP, lipids           | after 8 wks<br><u>FPG (mmol/l):</u><br>Benefit for IG/CG: MD 0.31 (0.08-0.54)<br><u>HbA1c: (%):</u><br>No differences (MD 0.05)                                                                                                                                                                            |

| Study name                                                                                                                                                                                                                                                                                                                                                                                                                           | Setting                 | Population                                        | Intervention vs. Control  | Outcomes              | Results                                                                                   |
|--------------------------------------------------------------------------------------------------------------------------------------------------------------------------------------------------------------------------------------------------------------------------------------------------------------------------------------------------------------------------------------------------------------------------------------|-------------------------|---------------------------------------------------|---------------------------|-----------------------|-------------------------------------------------------------------------------------------|
| registration number<br>Design                                                                                                                                                                                                                                                                                                                                                                                                        | Place, setting and time | Inclusion / Exclusion criteria<br>Characteristics | Description with duration | Primary and secondary | Longest follow-up period with intervention effects (IG vs. CG) with SD, 95%-CI or p value |
| lactation                                                                                                                                                                                                                                                                                                                                                                                                                            |                         |                                                   |                           |                       |                                                                                           |
| BMI: Body mass index; CG: Control group; CG/IG: Crossover from CG to IG; CI: Confidence interval; DBP: Diastolic blood pressure; DM: diabetes mellitus; FPG: fasting plasma glucose; HbA1c: haemoglobin A1c; IG/CG: cross over from IG to CG; IG: intervention group; n: number of participants; MD: mean difference; RCT: randomized controlled trial; SBP: Systolic blood pressure; SD: Standard-deviation; wks: weeks; yrs: years |                         |                                                   |                           |                       |                                                                                           |

**Table 2: Characteristics and results of studies on patients with pre-DM**

Studies on patients with DM1

| Study name                                          | Setting                                  | Population                                                                                                                                                                                                                                                   | Intervention vs. Control                                                                                                                                                                                                                                                                 | Outcomes                                                                                                                                     | Results                                                                                                                                                                                                                                                             |
|-----------------------------------------------------|------------------------------------------|--------------------------------------------------------------------------------------------------------------------------------------------------------------------------------------------------------------------------------------------------------------|------------------------------------------------------------------------------------------------------------------------------------------------------------------------------------------------------------------------------------------------------------------------------------------|----------------------------------------------------------------------------------------------------------------------------------------------|---------------------------------------------------------------------------------------------------------------------------------------------------------------------------------------------------------------------------------------------------------------------|
| registration number Design                          | Place, setting and time                  | Inclusion / Exclusion criteria<br>Characteristics                                                                                                                                                                                                            | Description with duration                                                                                                                                                                                                                                                                | Primary and secondary                                                                                                                        | Longest follow-up period with intervention effects (IG vs. CG) with SD, 95%-CI or p value                                                                                                                                                                           |
| <b>Educational strategies</b>                       |                                          |                                                                                                                                                                                                                                                              |                                                                                                                                                                                                                                                                                          |                                                                                                                                              |                                                                                                                                                                                                                                                                     |
| <b>Malipa 2013</b><br>RCT                           | Zambia                                   | DM1, 16-19 yrs<br>n=40<br>55% females<br>16-17 yrs: 35 %<br>18-19 yrs: 65 %<br>Compliance: worse in IG 26.4 vs. 14.6 (p=0.001)<br>Impact of diabetes: 20.5<br>Worries about diabetes: 20.5<br>Satisfaction with life: 20.5                                   | IG (n=20): 1 meeting /wk over 8 wks<br>CG (n=20); waiting list<br>Duration: 8 wks                                                                                                                                                                                                        | Compliance to treatment (Rating scale for compliance)<br>Quality of life (impact and worries about diabetes, satisfaction with life)         | After 2 months:<br>Compliance: better in IG (11.0 vs. 30; p<0.001)<br>Impact of diabetes: better in IG (16.8 vs. 24.2; p=0.045)<br>Worries about diabetes: better in IG (14.32 vs. 26.68; p=0.001)<br>Satisfaction with life: better in IG (28.5 vs. 12.5; p<0.001) |
| <b>Strategies to enhance physical activity</b>      |                                          |                                                                                                                                                                                                                                                              |                                                                                                                                                                                                                                                                                          |                                                                                                                                              |                                                                                                                                                                                                                                                                     |
| <b>Salem 2010</b><br>RCT                            | Egypt, urban<br>02/2009-11/2009          | DM1 for ≥3 years, 12-18 yrs, HbA1c ≥7.5 % for ≥6 months<br>no significant diabetic complications limiting exercise like, uncontrolled hypertension, diabetic keto-acidosis, severe hypoglycemia within the past 3 months, patients on lipid lowering therapy | n=196<br>61.7 % female<br>age (yrs): 14.78 ± 2.31<br>HbA1c (%): 8.7±1.7<br>duration of diabetes (yrs): 4.6 ± 1.9<br>IG2 (n=73): attended exercise sessions three times/week vs. IG 1 (n=75): attended exercise sessions once times/week vs. CG (n=48): no exercise<br>Duration: 6 months | glycemic control, plasma lipids values, blood pressure, severity and frequency of hypoglycemia, anthropometric measurements and insulin dose | Change over 6 months:<br>HbA1c (%):<br>Benefit for IG2 and IG1:<br>7.8 ± 1.0 vs. 8.1 ± 1.1 vs. 8.9 ± 1.3% (p=0.2)                                                                                                                                                   |
| <b>Strategies on nutrition</b>                      |                                          |                                                                                                                                                                                                                                                              |                                                                                                                                                                                                                                                                                          |                                                                                                                                              |                                                                                                                                                                                                                                                                     |
| <b>Abdulrhman 2013</b><br>NCT01554566<br>Cross-over | Egypt, urban, tertiary care<br>01/2010 - | DM1, age > 2 yrs, HbA1c< 10 %<br>no renal or hepatic impairment, coexisting                                                                                                                                                                                  | n=20<br>50 % females<br>age (yrs): 11.3 ± 4.3<br>duration of diabetes (yrs): 4.7±4.5                                                                                                                                                                                                     | IG/ CG (n=10):<br>Honey consumption (0.5 ml/kg body weight per day) vs.                                                                      | After 12 weeks: (IG/CG vs. CG/IG):<br>HbA1c (%):<br>Benefit with CG/IG: 6.7±0.9 vs. 5.9±0.8 (p<0.01)<br>no differences in change in period 1: -                                                                                                                     |

| Study name<br>registration<br>number<br>Design         | Setting<br>Place,<br>setting and<br>time   | Population<br>Inclusion / Exclusion criteria<br>Characteristics                                                                                                                                                                                                                                                                                                                                           | Intervention vs. Control<br>Description with duration                                                                                                   | Outcomes<br>Primary and secondary                                                                                                                                                                                                                                                                                 | Results<br>Longest follow-up period with<br>intervention effects (IG vs. CG) with<br>SD, 95%-CI or p value                                                                                                                                                                                                                                                                                                                                                           |
|--------------------------------------------------------|--------------------------------------------|-----------------------------------------------------------------------------------------------------------------------------------------------------------------------------------------------------------------------------------------------------------------------------------------------------------------------------------------------------------------------------------------------------------|---------------------------------------------------------------------------------------------------------------------------------------------------------|-------------------------------------------------------------------------------------------------------------------------------------------------------------------------------------------------------------------------------------------------------------------------------------------------------------------|----------------------------------------------------------------------------------------------------------------------------------------------------------------------------------------------------------------------------------------------------------------------------------------------------------------------------------------------------------------------------------------------------------------------------------------------------------------------|
| RCT                                                    | 10 / 2011                                  | diseases or therapies that<br>may affect body weight or<br>serum lipids                                                                                                                                                                                                                                                                                                                                   | HbA1c (%): 7.21± 0.76<br>fasting glucose<br>(mg/dl): 154.5±22.5                                                                                         | CG/IG (n=10): changed<br>after 12 wks and received<br>than honey<br><u>Duration:</u> 12 wks.                                                                                                                                                                                                                      | postprandial glucose,<br>HBA1c, serum lipid profile<br>5.83 ± 13.66 vs. 2.94±8.82 (p=0.105)<br><u>Fasting glucose (mg/dl):</u><br>• benefit with CG/IG: 142.7 ±26.6 vs.<br>116.7±19.4 (p<0.01)<br>benefit with IG/CG in period 1:-21.51 ±<br>10.84 vs. -0.08±5.14 (p=0.001)                                                                                                                                                                                          |
| <b>Mohamad<br/>2009</b><br><br>RCT                     | Egypt,<br>urban                            | DM1, age 17 to 20 yrs<br><br>no acute metabolic<br>complications like diabetic<br>ketoacidosis, hypoglycaemia,<br>cardiovascular events, renal<br>or acute infections                                                                                                                                                                                                                                     | n=64<br>30 % female<br>age (yrs): 19.9±6.8<br>HbA1c (%): 9.52±2.08<br>fasting glucose<br>(mg/dl): 228.7±13.5<br>BMI (kg/m <sup>2</sup> ):<br>18.82±3.01 | IG (n=27):<br>camel milk (500 ml)<br>+usual care<br>vs.<br>CG (n=27):<br>usual care for diabetes<br>(i.e. diet, exercise, insulin<br>mixtard)<br><u>Duration:</u> 16 weeks                                                                                                                                        | <u>Not specified:</u><br>HbA1c, human C-peptide,<br>lipid profile, serum<br>insulin, anti-insulin<br>antibodies, creatinine<br>clearance, albumin<br>extraction in 24 h urine,<br>BMI, Diabetes QoL score,<br>fasting glucose<br>After 16 wks<br>HbA1c (%):<br>Benefit for IG: 7.16±1.84 vs. 9.59±2.05<br>fasting glucose (mg/dl):<br>benefit for IG: 227.2±17.7 vs.<br>98.9±16.2                                                                                    |
| <b>van der Hoogt<br/>2017</b><br><br>cross-over<br>RCT | South Africa                               | DM1, age 4-17 yrs on insulin<br>pump therapy, HbA1c>9,6%<br>for ≥3months, BMI/age<br>z.score -1 to < 3, total daily<br>insulin use of >0,5 u/kg<br>no remission of diabetes,<br>smoking, coeliac disease,<br>cystic fibrosis, diseases or<br>medication that are<br>associated with delayed<br>gastric emptying or altered<br>digestation, glucocorticoids,<br>oral diabetic drugs, no acute<br>illnesses | n=32<br>41% female<br>age (yrs): 10.4±4.0<br>HbA1c (%): 8.2±0.8<br>duration of Diabetes<br>(yrs): 3.5 (1.5-8.0)                                         | IG1 (n=22):<br>1 home-based_low fat and<br>protein meal<br>vs.<br>IG2 (n=22):<br>1 high fat and protein<br>meal with identical<br>carbohydrate content<br>two meals were<br>consumed at dinner time<br>(18:00) under parental<br>supervision at least 1 day<br>apart within one month<br><u>Duration:</u> 3months | primary: peak sensor<br>glucose value post-meal,<br>time to peak sensor<br>glucose, time of first and<br>largest correction bolus,<br>total correction insulin,<br>total meal insulin,<br>additional insulin<br>required ,area under the<br>sensor glucose response<br>curve (AUC) (≥ 8 mmol/L),<br>duration of elevated post-<br>prandial glucose<br>Change over 12 weeks<br><u>Occurance of hypoglycaemic events:</u><br>7 (32 %) vs. 1 patients after IG1 vs. IG2 |
| <b>Medical device</b>                                  |                                            |                                                                                                                                                                                                                                                                                                                                                                                                           |                                                                                                                                                         |                                                                                                                                                                                                                                                                                                                   |                                                                                                                                                                                                                                                                                                                                                                                                                                                                      |
| Elbarbary<br>2016<br><br>RCT                           | Egypt,<br>urban<br><br>06/2014-<br>07/2014 | DM1, adolescents and adults<br>who wished to fast the<br>month of Ramadan with<br>insulin pump for ≥6 months<br>and attending the whole                                                                                                                                                                                                                                                                   | n=73<br>68.3% female<br>age (yrs): 15.6±2.7<br>HbA1c (%): 7.65±0.9<br>BMI (kg/m <sup>2</sup> ):                                                         | Insulin pump therapy<br>during Ramadan fasting<br><br>IG (n=25):<br>sensor with low glucose                                                                                                                                                                                                                       | Primary: hypoglycaemia<br><u>Other:</u> glucose value,<br>number of 'full fasted<br>days', emergency hospital<br>visit for diabetes-related<br>After 1 months:<br><u>Glucose value (mg/dl):</u><br>152.5±17.3 vs. 141±33.8 (p=0.9)<br><u>Complications:</u><br>Number of hypoglycaemic excursions:                                                                                                                                                                   |

1  
2  
3  
4  
5  
6  
7  
8  
9  
10  
11  
12  
13  
14  
15  
16  
17  
18  
19  
20  
21  
22  
23  
24  
25  
26  
27  
28  
29  
30  
31  
32  
33  
34  
35  
36  
37  
38  
39  
40  
41  
42  
43  
44  
45  
46

| Study name<br>registration<br>number<br>Design  | Setting<br>Place,<br>setting and<br>time   | Population<br>Inclusion / Exclusion criteria                                                                                                                                                            | Characteristics                                                                                                                                       | Intervention vs. Control<br>Description with duration                                                                                                    | Outcomes<br>Primary and secondary                                                                                                                       | Results<br>Longest follow-up period with<br>intervention effects (IG vs. CG) with<br>SD, 95%-CI or p value                                                                                                                                                        |
|-------------------------------------------------|--------------------------------------------|---------------------------------------------------------------------------------------------------------------------------------------------------------------------------------------------------------|-------------------------------------------------------------------------------------------------------------------------------------------------------|----------------------------------------------------------------------------------------------------------------------------------------------------------|---------------------------------------------------------------------------------------------------------------------------------------------------------|-------------------------------------------------------------------------------------------------------------------------------------------------------------------------------------------------------------------------------------------------------------------|
|                                                 |                                            | education session 2 months before fasting and committed to follow-up the given instructions                                                                                                             | 24.56±3.5 duration of diabetes (yrs): 5.8±2.9 on pump therapy (yrs): 1.73±0.99                                                                        | suspension activation vs. <u>CG (n=35):</u> sensor without low glucose suspension activation <u>Duration:</u> 1 month                                    | problem                                                                                                                                                 | 3.68±1.62 vs. 6.7±2.1 (p=0.001)<br>Number of hyperglycaemic excursions: 17.0±4.0 vs. 23.0±7.6 (p=0.001)<br>No severe hypoglycaemic events, no episodes of diabetic ketoacidosis, no hyperglycaemic events associated with ketosis no deaths or device-related SAE |
| <b>Pharmacological Strategies</b>               |                                            |                                                                                                                                                                                                         |                                                                                                                                                       |                                                                                                                                                          |                                                                                                                                                         |                                                                                                                                                                                                                                                                   |
| <b>Elbarbary 2018</b><br>NCT0292825<br><br>RCT  | Egypt,<br>urban                            | DM1, age: 9 - 18 yrs, ≥ 5 yrs disease duration, active diabetic nephropathy in the form of microalbuminuria, HbA1c ≤ 8.5 %                                                                              | n=90<br>52.3 % female<br>age (yrs): 12.85±3.1<br>HbA1c (%):7.85±1.95                                                                                  | <u>IG (n=45):</u><br>1 g/d carnosine vs. <u>CG (n=45):</u><br>control/placebo group                                                                      | <u>Primary:</u> change in tubular damage marker<br><u>Secondary:</u> urinary albumin excretion (UAE), oxidative stress markers<br><u>Safety:</u> any AE | After 12 wks:<br><u>HbA1c (%):</u><br>• Benefit for IG: 7.4 ±1.3 vs. 8.3±2.4<br>• change -9.88±7.12 vs. 3.89±2.28 (p=0.005)<br>No adverse reactions were reported                                                                                                 |
|                                                 |                                            | no infection, renal impairment due to other causes other than diabetes, other diabetic complications, hypersensitivity to carnosine                                                                     |                                                                                                                                                       | Patients in both groups received oral ACE-Is captopril 25 mg<br><u>Duration:</u> 12 wks                                                                  |                                                                                                                                                         |                                                                                                                                                                                                                                                                   |
| <b>Elbarbary 2020</b><br>NCT03594240<br><br>RCT | Egypt,<br>urban<br><br>03/2017-<br>03/2018 | DM1 on insulin therapy with > 5 yrs of disease duration, 12-18 yrs, active nephropathy, HbA1c< 8.5 %, no infections, renal impairment due to other causes than diabetes, other diabetic complications , | n=80<br>55% female<br>age (yrs): 15.4 ± 1.6<br>HbA1c (%):7.95±0.5<br>fasting glucose (mg/dl): 114.5±21.8<br>duration of diabetes (years): 8.65 ± 2.65 | both groups received oral angiotensin-converting-enzyme inhibitors (captopril)<br><br><u>IG (n=40)</u> oral vitamin B complex (B1,B6,B12) once daily vs. | <u>Primary:</u> Cystatin C diet, physical activity, and metformin dosage                                                                                | after 12 weeks<br><u>HbA1c (%):</u><br>Benefit for IG: 7.5±0.6 vs. 8.0±0.6<br><u>Fasting glucose (mg/dl):</u><br>107.7±14.1 vs. 116.4±17 (p=131)                                                                                                                  |

| Study name                                                                                                                                                                                                                                                                                                                                        | Setting                 | Population                                                                                                                                          | Intervention vs. Control                 | Outcomes              | Results                                                                                   |
|---------------------------------------------------------------------------------------------------------------------------------------------------------------------------------------------------------------------------------------------------------------------------------------------------------------------------------------------------|-------------------------|-----------------------------------------------------------------------------------------------------------------------------------------------------|------------------------------------------|-----------------------|-------------------------------------------------------------------------------------------|
| registration number<br>Design                                                                                                                                                                                                                                                                                                                     | Place, setting and time | Inclusion / Exclusion criteria<br>Characteristics                                                                                                   | Description with duration                | Primary and secondary | Longest follow-up period with intervention effects (IG vs. CG) with SD, 95%-CI or p value |
|                                                                                                                                                                                                                                                                                                                                                   |                         | elevated liver enzymes, hyper-or hypothyroidism, hypertension, neoplasm, taking any vitamins or food supplements within 1 months before study start | CG (n=40): placebo<br>Duration: 12 weeks |                       |                                                                                           |
| BMI: Body mass index; CG: Control group; CG/IG: Crossover from CG to IG; CI: Confidence interval; DM1: Type 1 diabetes; FPG: fasting plasma glucose; HbA1c: haemoglobin A1c; IG/CG: cross over from IG to CG; IG: intervention group; n: number of participants ;RCT: randomized controlled trial; SD: Standard-deviation; wks: weeks; yrs: years |                         |                                                                                                                                                     |                                          |                       |                                                                                           |

**Table 3: Characteristics and results of studies on patients with DM1**

## RCTs mainly including patients with DM2

| Study name                                  | Setting                                 | Population                                                                           | Intervention vs. Control                                                                                                                                                           | Outcomes                                                                                                                                                                                                                                                         | Results                                                                                                                                                                                                                                                                                                                                                 |                                                                                                                                                                                                                                                                                                                                                                                                                                                                                                                                                     |
|---------------------------------------------|-----------------------------------------|--------------------------------------------------------------------------------------|------------------------------------------------------------------------------------------------------------------------------------------------------------------------------------|------------------------------------------------------------------------------------------------------------------------------------------------------------------------------------------------------------------------------------------------------------------|---------------------------------------------------------------------------------------------------------------------------------------------------------------------------------------------------------------------------------------------------------------------------------------------------------------------------------------------------------|-----------------------------------------------------------------------------------------------------------------------------------------------------------------------------------------------------------------------------------------------------------------------------------------------------------------------------------------------------------------------------------------------------------------------------------------------------------------------------------------------------------------------------------------------------|
| registration number Design                  | Place, setting and time                 | Inclusion / Exclusion criteria Characteristics                                       | Description with duration                                                                                                                                                          | Primary and secondary                                                                                                                                                                                                                                            | Longest follow-up period with intervention effects (IG vs. CG) with SD, 95%-CI or p value                                                                                                                                                                                                                                                               |                                                                                                                                                                                                                                                                                                                                                                                                                                                                                                                                                     |
| <b>Educational strategies</b>               |                                         |                                                                                      |                                                                                                                                                                                    |                                                                                                                                                                                                                                                                  |                                                                                                                                                                                                                                                                                                                                                         |                                                                                                                                                                                                                                                                                                                                                                                                                                                                                                                                                     |
| <b>Abaza 2017</b><br>NCT02868320<br><br>RCT | Egypt, urban, tertiary care, 03-07/2015 | DM2, mobile phone, capable to read SMS or live with someone who could read           | n=73<br>56 % females<br>age (yrs): 51.5±9.2<br>majority had had diabetes for > 1 yr<br>hypertension: 41.1 %<br>on insulin: 19.2 %<br>DM complication: 80.8 %<br>HbA1c (%): 9.7±2.7 | Diabetes awareness program:<br>paper-based educations material plus<br><u>IG (n=34)</u> : daily messages and weekly reminders addressing various diabetes care categories vs.<br><u>CG (n=39)</u> : paper-based educations material<br><u>Duration</u> : 12 wks. | <u>Primary</u> : change in Hba1C<br><u>Secondary</u> :<br>Random blood glucose levels, body weight, adherence of treatment and medication, diabetes self-efficacy and knowledge, rate of hospital/ER visits, frequency of measurements, regular exercise, patients confidence in healthcare provider and satisfaction, healthcare provider's reputation | After 3 months:<br><u>HbA1c (%)</u> :<br>• No differences: 8.73 ±1.98 vs. 8.84±2.40, MD <sub>a</sub> : 0.290 (-0.402 to 0.983; p = 0.406)<br>• Benefit with IG: 47 vs. 15 % achieved the targeted 1% drop (p = 0.003)<br><u>Random blood glucose (mg/dl)</u> :<br>• No difference: 181±65 vs. 201±87 (p=0.288)<br><u>Treatment adherence (scores)</u> :<br>• Benefit with IG in SCI 3.42±0.48 vs. 2.52±0.49 (p<0.001) and Morisky: 3.76±0.55 vs. 2.74±1.07 (p<0.001)<br><u>Hospital /ER admission (%)</u> :<br>No differences: 0 vs. 10.3 (p=0.118) |
| <b>Adibe 2013</b><br><br>RCT                | Nigeria, urban, tertiary care           | DM2, age≥ 18 yrs with oral hypoglycemic and / or insulin therapy<br><br>no pregnancy | n=220<br>58 % females<br>age (yrs): 52.6±7.9<br>duration of diabetes (yrs): 4.7±2.5,<br>60.5% with diabetes > 5 yrs<br>on insulin: 13.6 %<br>hypertension: 60.5 %                  | <u>IG (n=110)</u> : structured self-care education and training program by pharmacists and nurses vs.<br><u>CG (n=110)</u> : usual / conventional care<br><u>Duration</u> : 12 months                                                                            | <u>Primary</u> : incremental cost-utility ratio, net monetary benefit<br><u>Other</u> : quality of life                                                                                                                                                                                                                                                 | After 12 months:<br><u>Quality of life</u> :<br>• Benefit with IG: 0.86 ± 0.12 vs. 0.64 ± 0.10 (p=0.0001) improved single attributes except "hearing" functioning of the patients<br><u>Costs</u> :<br>• benefit of \$0.76±0.15 vs. \$0.64± 0.15 QALY/patient and year; MD: \$ 0.12 (0.07 to 0.16)<br>• incremental cost-utility ratio of \$571 per QALY                                                                                                                                                                                            |
| <b>Adjei 2015</b>                           | Ghana, urban                            | DM                                                                                   | n=200<br>64.5% female                                                                                                                                                              | <u>IG: (n=100)</u> :<br>electronical reminder for                                                                                                                                                                                                                | <u>Primary</u> : Compliance with appointment dates                                                                                                                                                                                                                                                                                                      | After 6 months:<br><u>Adherence to appointment schedules</u>                                                                                                                                                                                                                                                                                                                                                                                                                                                                                        |

| Study name<br>registration<br>number<br>Design     | Setting<br>Place,<br>setting and<br>time                                                   | Population<br>Inclusion / Exclusion criteria<br>Characteristics                                                                                                                                                                                                                                                                                                                                                                                                                    | Intervention vs. Control<br>Description with duration                                                                                                                                                                                                                                                                                            | Outcomes<br>Primary and secondary                                                                                                                                                                                                                                                                                                                                                                                          | Results<br>Longest follow-up period with<br>intervention effects (IG vs. CG) with<br>SD, 95%-CI or p value                                                                                                                |                                                                                                                                                                                                                                                                                                                                                                                                                                                                                                                                                                                                 |
|----------------------------------------------------|--------------------------------------------------------------------------------------------|------------------------------------------------------------------------------------------------------------------------------------------------------------------------------------------------------------------------------------------------------------------------------------------------------------------------------------------------------------------------------------------------------------------------------------------------------------------------------------|--------------------------------------------------------------------------------------------------------------------------------------------------------------------------------------------------------------------------------------------------------------------------------------------------------------------------------------------------|----------------------------------------------------------------------------------------------------------------------------------------------------------------------------------------------------------------------------------------------------------------------------------------------------------------------------------------------------------------------------------------------------------------------------|---------------------------------------------------------------------------------------------------------------------------------------------------------------------------------------------------------------------------|-------------------------------------------------------------------------------------------------------------------------------------------------------------------------------------------------------------------------------------------------------------------------------------------------------------------------------------------------------------------------------------------------------------------------------------------------------------------------------------------------------------------------------------------------------------------------------------------------|
| RCT                                                |                                                                                            | age (yrs):<br>< 50 yrs: 63 %<br>> 50 yrs: 37 %<br>fasting glucose<br>(mmol/l): 10.4±3.8                                                                                                                                                                                                                                                                                                                                                                                            | clinical appointments of<br>patients + alert system<br>for abnormal laboratory<br>results<br>vs.<br><u>CG: (n=100):</u><br>usual diabetes care,<br>paper based method<br><u>Duration: 6 months</u>                                                                                                                                               | <u>Other:</u> metabolic risk<br>factors, BMI                                                                                                                                                                                                                                                                                                                                                                               | (%)<br>Benefit for IG: 97.8 vs. 89.4 (p=0.010)<br><u>Fasting glucose (mmol/l):</u><br>Benefit for IG: 8.04±2.14 vs. 8.85±2.63;<br>MD 0.4 (-0.59 to -0.36, p=0.022)                                                        |                                                                                                                                                                                                                                                                                                                                                                                                                                                                                                                                                                                                 |
| <b>Amendezo<br/>2017</b><br>NCT02032108<br><br>RCT | Rwanda,<br>urban,<br>tertiary care                                                         | DM2>3mths, age>21yrs<br><br>no pregnancy or severe co-<br>morbid illnesses.                                                                                                                                                                                                                                                                                                                                                                                                        | n=251<br>69.3% females<br>age (yrs): 50.9 ±10.9<br>BMI (kg/m <sup>2</sup> ): 27.9<br>(27.0-28.5)<br>duration of diabetes :<br><10 yrs: 73.7%, >10<br>yrs: 16.3%<br>HbA1c (%): 8.98±8.6-<br>9.3                                                                                                                                                   | <u>IG (n=115):</u><br>standard care plus<br>monthly lifestyle<br>education sessions of 45<br>min duration<br>vs.<br><u>CG (n=108):</u> standard<br>care<br><u>Duration: 12 months</u>                                                                                                                                                                                                                                      | <u>Primary:</u> difference in<br>HbA1c<br><u>Secondary:</u> fasting<br>glucose, systolic and<br>diastolic blood pressure,<br>BMI                                                                                          | after 12 months:<br><u>HbA1c (%):</u><br>Benefit for IG with median reductions<br>of -1.70 (-2.09 to -1.31) vs. -0.52 (-0.95<br>to -0.10); MD: -0.72 ( -1.14 to -0.30;<br>p< 0.001)<br><u>Fasting glucose (mmol/L):</u><br>6.9 (6.45 to 7.36) vs. 9.02 (8.18 to<br>9.87) (p<0.001)                                                                                                                                                                                                                                                                                                              |
| <b>Chraibi 2017</b><br>NCT01589653<br><br>RCT      | Egypt,<br>Indonesia,<br>Morocco,<br>Saudi<br>Arabia,<br>Vietnam<br><br>05/2012-<br>07/2015 | DM2 with diagnosis ≥ 12<br>months, age≥18 , currently<br>being treated with NPH<br>Insulin for ≥ 3 months +<br>metformin (1000-1500 mg)<br>for ≥ 2 months, HbA1c ≥ 7.0%<br>≤10%, BMI ≤ 40.0 kg/m <sup>2</sup><br><br>no treatment with<br>thiazolidinedione, glucagon-<br>like peptide-1 receptor<br>agonists, pramlintide within<br>the last 3 months , >1 IU/kg<br>NPH insulin daily; previous<br>use of premixed or bolus<br>insulin, > 1 severe<br>hypoglycemic episode during | n=155<br>74.9 % female<br>age (yrs): 54.5 ±10.0<br>BMI (kg/m <sup>2</sup> ):<br>29.05±4.9<br>HbA1c (%): 8.6 ±0.83<br>fasting glucose<br>(mmol/L): 8.97<br>duration of diabetes<br>(yrs): 9.5±5.8<br>African patients:<br>• Egypt: 25.75 %<br>• Morocco: 27.7 %<br>Diabetic nephropathy<br>/ neuropathy /<br>retinopathy (%): 3.2 /<br>16.1 / 3.2 | <u>IG (n=76):</u><br>patient driven titration of<br>Biphasic insulin aspart 30<br>twice daily, 3 clinic visits<br>vs.<br><u>CG (n=79):</u><br>physician driven titration<br>twice daily, 6 clinic visits<br><br>Titration in both arms<br>according to the titration<br>protocol bases on self-<br>measured plasma glucose<br>values, measured twice<br>daily on 3 preceding days,<br>telephone contact<br>whenever deemed | <u>Primary:</u> change in HbA1c<br><u>Secondary:</u> proportion of<br>patients achieving the<br>ADA target of HbA1c<br><7.0 % and the HbA1c<br>target of <6.5 % after<br>20 weeks, FPG changes,<br>hypoglycemic episodes, | Change over 5 months:<br><u>HbA1c (%):</u><br>• Decreased in both arms with non-<br>inferiority between groups: MD -0.23<br>(-0.54 to 0.08)<br>• More patients reached HbA1c <7.0%:<br>40.8 vs. 29.1 %, RR: 1.79 (0.87 to 3.65)<br>and <6.5%: 25 vs. 19 %; RR: 1.52 (0.67<br>to 3.46)<br>• More patients reached target HbA1c<br>levels without severe or minor<br>hypoglycemic episodes: <7.0%: 38 vs.<br>27.8 %, RR: 1.52 (0.61 to 3.79), <6.5%:<br>18 vs. 14.8 %; RR 1.13 (0.36 to 3.52)<br><u>FPG (mmol/l):</u><br>• Decreased in both arms with no<br>difference between groups: 0.95±0.28 |



| Study name<br>registration<br>number<br>Design                   | Setting<br>Place,<br>setting and<br>time                           | Population<br>Inclusion / Exclusion criteria                                                                                                                              | Population<br>Characteristics                                                                                                                                       | Intervention vs. Control<br>Description with duration                                                                                                                                                                                                                                                            | Outcomes<br>Primary and secondary                                                                                                                                                                                                | Results<br>Longest follow-up period with<br>intervention effects (IG vs. CG) with<br>SD, 95%-CI or p value                                                                                                                                                                                                                                                                                                                      |
|------------------------------------------------------------------|--------------------------------------------------------------------|---------------------------------------------------------------------------------------------------------------------------------------------------------------------------|---------------------------------------------------------------------------------------------------------------------------------------------------------------------|------------------------------------------------------------------------------------------------------------------------------------------------------------------------------------------------------------------------------------------------------------------------------------------------------------------|----------------------------------------------------------------------------------------------------------------------------------------------------------------------------------------------------------------------------------|---------------------------------------------------------------------------------------------------------------------------------------------------------------------------------------------------------------------------------------------------------------------------------------------------------------------------------------------------------------------------------------------------------------------------------|
|                                                                  |                                                                    | the previous 12 month,<br>impaired kidney or hepatic<br>function, proliferative<br>retinopathy or maculopathy<br>requiring treatment                                      | Macroangiopathy (%):<br>5.2                                                                                                                                         | necessary<br><u>Duration:</u> 20 weeks                                                                                                                                                                                                                                                                           |                                                                                                                                                                                                                                  | vs. 0.67±0.28; MD: -0.28 (-1.07 to 0.52)<br><u>Costs</u><br>• Less frequent clinic visits to healthcare<br>professionals in IG: 4.8±0.65 vs.<br>7.5±1.42 visits/patient<br><u>Complications:</u><br>• hypoglycemic episodes: no difference:<br>608.4 vs. 789.2 / 100 patient-years of<br>exposure; RR: 0.74 (0.44; 1.23)<br>treatment-emergent AEs: no<br>difference: 324.2 vs. 302.2 events /<br>100 patient-years of exposure |
| <b>Debussche<br/>2018</b><br>NCT01485913<br><br>RCT              | Mali,<br>urban,<br>secondary<br>care,<br><br>07/2011-<br>02/2013   | DM2, age 30-80 yrs,<br>HbA1c ≥ 8 %,<br><br>no DM1, severe diabetes<br>complications or concomitant<br>illnesses that threatened<br>their functional or vital<br>prognosis | n=151<br>76.2% female<br>age (yrs): 52.5±9.8<br>BMI (kg/m <sup>2</sup> ):28.6±5.4                                                                                   | <u>IG (n=76):</u><br>peer-led structured<br>patient education<br>received culturally<br>tailored structured<br>patient education (3<br>courses of 4 sessions)<br>delivered in the<br>community by five<br>trained peer educators<br>vs.<br><u>CG (n=75):</u> conventional<br>care alone<br><u>Duration:</u> 1 yr | <u>Primary:</u> HbA1c<br><u>Secondary:</u><br>anthropometric<br>indicators (weight and<br>BMI, waist<br>circumference), SBP, DBP,<br>anti-diabetic and anti-<br>hypertensive treatment,<br>knowledge score, dietary<br>practices | Change to 12 months<br><u>HbA1c (%)</u> :<br>• Benefit in IG: MD 1.05 % (-1.54;-<br>0.56) vs. -0.15 % (-0.56; 0.26) (p =<br>0.006)                                                                                                                                                                                                                                                                                              |
| <b>Essien<br/>2017</b><br><br>PACTR201302<br>00047835<br><br>RCT | Nigeria,<br>urban,<br>tertiary<br>care,<br><br>09/2013-<br>05/2014 | DM1 or DM2, age: ≥ 18 yrs,<br>HbA1c> 8.5 %, able to engage<br>in moderate exercise,<br><br>no eye disease that would<br>limit the ability to read                         | n=118<br>60.2 % female<br>age (yrs): 52.7±10.5<br>BMI (kg/m <sup>2</sup> ):<br>28.9±7.5<br>HbA1c (%):10.7±1.6<br>type of diabetes<br>• DM1: 14.4 %<br>• DM2: 85.6 % | <u>IG: (n=59):</u><br>intensive and systematic<br>disease self-management<br>education programme<br>(invitation and<br>encouragement by<br>clinical staff to attend 12<br>structured teaching<br>sessions)<br>vs.                                                                                                | <u>Primary:</u> HbA1c                                                                                                                                                                                                            | After 6 months:<br><u>HbA1c (%)</u> :<br>8.4 (8 to 8.9) vs. 10.2 (9.8 to 10.7);<br>MD <sub>a</sub> : -1.8 (-2.4 to -1.2); (p < 0.0001)                                                                                                                                                                                                                                                                                          |

| Study name<br>registration<br>number<br>Design               | Setting<br>Place,<br>setting and<br>time                                            | Population<br>Inclusion / Exclusion criteria                                                                                                                                                    | Characteristics                                                                                                                                                                                                                                     | Intervention vs. Control<br>Description with duration                                                                                                                                                                                                                                                                                                                                                                  | Outcomes<br>Primary and secondary                                                                                                                                             | Results<br>Longest follow-up period with<br>intervention effects (IG vs. CG) with<br>SD, 95%-CI or p value                                                                                                                                                                                                                                           |
|--------------------------------------------------------------|-------------------------------------------------------------------------------------|-------------------------------------------------------------------------------------------------------------------------------------------------------------------------------------------------|-----------------------------------------------------------------------------------------------------------------------------------------------------------------------------------------------------------------------------------------------------|------------------------------------------------------------------------------------------------------------------------------------------------------------------------------------------------------------------------------------------------------------------------------------------------------------------------------------------------------------------------------------------------------------------------|-------------------------------------------------------------------------------------------------------------------------------------------------------------------------------|------------------------------------------------------------------------------------------------------------------------------------------------------------------------------------------------------------------------------------------------------------------------------------------------------------------------------------------------------|
|                                                              |                                                                                     |                                                                                                                                                                                                 |                                                                                                                                                                                                                                                     | <u>CG (n=59):</u> conventional<br>disease-self-management<br>education<br><u>Duration:</u> 6 months                                                                                                                                                                                                                                                                                                                    |                                                                                                                                                                               |                                                                                                                                                                                                                                                                                                                                                      |
| <b>Fairall 2016</b><br>ISRCTN20283<br>604<br><br>Cluster-RCT | South Africa<br>,<br>urban/rural,<br>primary<br>care,<br><br>03/2011 –<br>11 / 2011 | age ≥ 18 yrs , clinics providing<br>service for NCD Patients with<br>DM, hypertension, chronic<br>respiratory disease or<br>depression, with self-<br>reported hypoglycaemic (in<br>case of DM) | n= 38 public sector<br>primary care clinics,<br>4393 patients,<br>n=1842 with DM<br>73 % female<br>age (yrs):median,<br>IQR): 52 (42-61) vs. 52<br>(44-62)<br>BMI (kg/m <sup>2</sup> ): 30±8<br>HbA1c (%):9 (4-17), in<br>HbA1c in DM≥ 7 %:<br>77 % | <u>IG (n=2166, 851 with<br/>DM):</u><br>Nurses were trained to<br>use a primary care<br>programme to support<br>and expand nurses`role in<br>NCD care and contains a<br>clinical management tool<br>with enhances<br>prescribing provisions<br>vs.<br><u>CG (n=2227, 991 with<br/>DM):</u><br>Nurses continued to use<br>the Lung Health and<br>HIV/AIDS approach with<br>usual training<br><u>Duration:</u> 14 months | <u>Primary (for DM):</u><br>treatment intensification<br>(addition or increase in<br>dose of metformin and/or<br>sulphonylurea, insulin,<br>ACE-inhibitor, aspirin,<br>statin | over 14 months<br><u>HbA1c (%):</u><br>• <7 %: 41 vs. 38 %; RR 1.08 (0.77 to<br>1.52; p=0.638)<br>• 7-10 %: 69 vs. 55 %; RR 1.30 (1.16 to<br>1.47; p<0.001)<br>• >10 %: 71 vs. 73 %; RR 0.97 (0.81 to<br>1.16; p=0.703)<br><u>Treatment intensification rates* (%):</u><br>• 57% vs. 50%, RRa: 1.11 (0.99 to 1.26)<br>(p=0.083) for patients with DM |
| <b>Hailu 2018</b><br>NCT03185689<br><br>RCT                  | Ethiopia,<br>urban,<br><br>02/2016-<br>10/2017                                      | DM2, age > 18 yrs<br><br>no DM1 or GDM, pregnant<br>women, severe cognitive or<br>physical impairment, and<br>terminally ill people                                                             | n=220<br>33 % female<br>age (yrs): 54.5±10<br>BMI (kg/m <sup>2</sup> ):25±4<br>HbA1c (%):10.5±4                                                                                                                                                     | <u>IG (n= 116):</u><br>Nurse-led disease-<br>management education:<br>6 sessions, supported<br>with illustrative pictures<br>handbooks and fliers,<br>customized to local<br>conditions by trained<br>nurses<br>vs.<br><u>CG (n=104):</u><br>usual follow-up care<br><u>Duration:</u> 9 months                                                                                                                         | <u>Primary:</u><br>patients with target<br>HbA1c ( ≤ 7 %)<br><u>Secondary:</u> systolic and<br>diastolic blood pressure,<br>fasting glucose, BMI,<br>waist circumference      | Change over 9 months:<br><u>HbA1c (%):</u><br>• No difference: 45 % vs. 50 % with<br>target values (p=0.21), MD: 2.88% (-<br>3.85 to -1.92) vs. 2.57% (-3.47 to -<br>1.67)<br><u>fasting glucose (mg/dl):</u><br>• Benefit with IG: 36 % vs.25 % with<br>target values, MD: -27 ( -45 to -9;<br>p=0.003)                                             |

| Study name<br>registration<br>number<br>Design             | Setting<br>Place,<br>setting and<br>time                                  | Population<br>Inclusion / Exclusion criteria                                                                                                                                                    | Characteristics                                                                                                                                                                                              | Intervention vs. Control<br>Description with duration                                                                                                                                                                                                                                                                                                                                                    | Outcomes<br>Primary and secondary                                                                                                                                                                                                                                                                                                                                      | Results<br>Longest follow-up period with<br>intervention effects (IG vs. CG) with<br>SD, 95%-CI or p value                                                                                                                                                                                                                                                                                                                                                                                                                                                                                                                            |
|------------------------------------------------------------|---------------------------------------------------------------------------|-------------------------------------------------------------------------------------------------------------------------------------------------------------------------------------------------|--------------------------------------------------------------------------------------------------------------------------------------------------------------------------------------------------------------|----------------------------------------------------------------------------------------------------------------------------------------------------------------------------------------------------------------------------------------------------------------------------------------------------------------------------------------------------------------------------------------------------------|------------------------------------------------------------------------------------------------------------------------------------------------------------------------------------------------------------------------------------------------------------------------------------------------------------------------------------------------------------------------|---------------------------------------------------------------------------------------------------------------------------------------------------------------------------------------------------------------------------------------------------------------------------------------------------------------------------------------------------------------------------------------------------------------------------------------------------------------------------------------------------------------------------------------------------------------------------------------------------------------------------------------|
| <b>Labhardt<br/>2011</b><br>NCT00744458<br><br>Cluster-RCT | Cameroon<br>rural,<br>primary<br>care,<br><br>08/2008-<br>02/2010         | newly detected adult patients<br>with DM2 and /or<br>hypertension in the<br>catchment area of nurse-led<br>health centres, staffed,<br>equipped and trained to care<br>for DM2 and hypertension | n=33 facilities, 221<br>patients<br>64% females<br>age (yrs): 59.8±12.7<br>diabetes: 15.4 %<br>Overweight (BMI 25-<br>29.9 kg/m <sup>2</sup> ): 28.5 %<br>Obesity<br>(BMI> 30 kg/m <sup>2</sup> ):<br>20.4 % | <u>IG 1 (11 centres, n=55):<br/>incentive group</u><br>free treatment for<br>1 months for patients<br>who regularly attended<br>follow up visits<br>vs.<br><u>IG 2 (11 centres, n=77):<br/>letter group:</u> reminder<br>letters in case of a missed<br>follow-up visit<br>vs.<br><u>CG (11 centres, n=89):</u><br>no additional<br>intervention<br><u>Duration:</u> 12 months                           | <u>Primary:</u><br>Patient retention at 1 yr<br>(≥ 12 follow-up visits<br>within 12 months)<br><u>Secondary:</u><br>Adherence with timely<br>attendance of follow-up<br>visit schemes and<br>changes in blood pressure<br>and blood glucose levels.                                                                                                                    | After 12 months:<br><u>Retention rates (%):</u><br>• Benefit for IG1 and IG2 vs.CG: 60 vs. 65<br>vs. 29 %; MD 34 (21 to 46) with no<br>differences between IG1 and IG2; MD -<br>5 (-22 to 12)<br><u>Loss to follow-up:</u><br>• Benefit for IG1 and IG2: IG1 vs. CG: HR<br>0.44 (0.27 to 0.72; p< 0.001)<br>• IG2 vs. CG: HR 0.38 (0.24 to 0.61;<br>p<0.001)<br><u>Adherence (%):</u><br>• Benefit for IG1 and IG2: 38 vs. 35 vs.<br>10; MD 26 (14 to 42), IG1 vs CG: MD<br>28(13 to 37); IG2 vs. CG: MD 25 (13 to<br>37)<br>• no difference between IG1 and IG2:<br>MD 3 (-14 to 20)<br><u>FPG:</u><br>No differences between groups |
| <b>Mash 2014</b><br><br>Cluster RCT                        | South<br>Africa,<br>urban,<br>primary<br>care,<br><br>12/2010<br>-12/2012 | DM2 with any therapy<br>attending community health<br>centres in the working class<br>areas of Cape Town<br>Metropole<br><br>no DM1, dementia, mental<br>illness or acute illness               | n=34 public sector<br>community health<br>centres, 1570<br>patients<br>73.8% females<br>age (yrs): 56.1±11.6<br>HbA1c (%): 9.1±2.3                                                                           | <u>IG (17 health centres,<br/>n=710):</u><br>4 monthly sessions lasting<br>60 min with group<br>education about diabetes<br>topics (understanding<br>diabetes and medication,<br>living a healthy lifestyle<br>and preventing<br>complications), delivered<br>by a health promotion<br>officer vs.<br><u>CG (17 health centres,<br/>n=860):</u><br>usual care: ad hoc advice<br>during consultations and | <u>Primary:</u><br>improvement of diabetes<br>self-care activities (5 %<br>weight loss, and a 1 %<br>reduction in HbA1c level)<br><u>Secondary:</u><br>improved diabetes<br>specific self-efficacy,<br>locus of control, mean<br>blood pressure, mean<br>weight loss, mean waist<br>circumference, mean<br>HbA1c, mean total<br>cholesterol levels, quality<br>of life | After 12 months:<br><u>HbA1c (%):</u><br>No differences: 8.4±2.0 vs. 8.8±2.2;<br>MD <sub>a</sub> : 0.01 (-0.27 to 0.28; p=0.967)<br><u>Adherence (self-care activities):</u><br>No differences in scores of physical<br>activity, use of diet plan or medication,<br>foot care or frequency of smoking<br><u>Quality of life:</u><br>No differences in physical functioning,<br>role or social functioning, mental or<br>general health and pain<br><u>Costs:</u><br>Incremental cost effectiveness ratio:<br>1862 Dollar/ QALY gained                                                                                                |

| Study name                                                 | Setting                                                       | Population                                                                                                                                                                                                                                                                                                                                                                                                                                                                                                                                               |                                                                                                                                                                                                                                                                                                                          | Intervention vs. Control                                                                                                                                                                                                                                                                                                                                                       | Outcomes                                                                                                                                                                                                                                 | Results                                                                                                                                                       |
|------------------------------------------------------------|---------------------------------------------------------------|----------------------------------------------------------------------------------------------------------------------------------------------------------------------------------------------------------------------------------------------------------------------------------------------------------------------------------------------------------------------------------------------------------------------------------------------------------------------------------------------------------------------------------------------------------|--------------------------------------------------------------------------------------------------------------------------------------------------------------------------------------------------------------------------------------------------------------------------------------------------------------------------|--------------------------------------------------------------------------------------------------------------------------------------------------------------------------------------------------------------------------------------------------------------------------------------------------------------------------------------------------------------------------------|------------------------------------------------------------------------------------------------------------------------------------------------------------------------------------------------------------------------------------------|---------------------------------------------------------------------------------------------------------------------------------------------------------------|
| registration number<br>Design                              | Place, setting and time                                       | Inclusion / Exclusion criteria                                                                                                                                                                                                                                                                                                                                                                                                                                                                                                                           | Characteristics                                                                                                                                                                                                                                                                                                          | Description with duration                                                                                                                                                                                                                                                                                                                                                      | Primary and secondary                                                                                                                                                                                                                    | Longest follow-up period with intervention effects (IG vs. CG) with SD, 95%-CI or p value                                                                     |
|                                                            |                                                               |                                                                                                                                                                                                                                                                                                                                                                                                                                                                                                                                                          |                                                                                                                                                                                                                                                                                                                          | occasional educational talks in waiting room<br><u>Duration:</u> 12 months                                                                                                                                                                                                                                                                                                     |                                                                                                                                                                                                                                          |                                                                                                                                                               |
| <b>Muchiri 2015</b><br><br>RCT                             | South Africa, rural, primary care,<br><br>04/2010-11/2011     | DM2, age 40-70 yrs attending community health centres, HbA1c $\geq$ 8 %, blood sugar levels $\geq$ 10 mmol/l, duration of diabetes $\geq$ 1 yr<br><br>no insulin therapy, pregnant women, full time employed                                                                                                                                                                                                                                                                                                                                             | n=82<br>86.6 % female<br>age (yrs): 59 $\pm$ 7.4<br>BMI(kg/m <sup>2</sup> ): 30.9 $\pm$ 6.9<br>HbA1c (%): 11.1 $\pm$ 2.0<br>duration of diabetes (yrs): 6                                                                                                                                                                | <u>IG (n=41):</u><br>education materials+ 8 weekly group educational sessions about diabetes and nutrition, follow-up sessions+vegetable gardening<br><u>CG (n=41):</u><br>education materials<br><u>Duration:</u> 12 months                                                                                                                                                   | <u>Primary:</u> HbA1c<br><u>Secondary:</u><br>Other clinical outcomes (BMI, blood pressure and blood lipids), HbA1c, dietary behaviours                                                                                                  | over 12 months<br><u>HbA1c (%):</u><br>• no difference: 9.8 $\pm$ 1.92 vs. 10.4 $\pm$ 1.92; MD -0.63 (-0.26 to 1.50; p=0.16)                                  |
| <b>Owolabi 2019</b><br>PACTR201810<br>599931422<br><br>RCT | South Africa urban/rural, primary care<br><br>07/2018-04/2019 | DM, age $\geq$ 18 yrs, DM diagnosed at least in the last 6 months, currently receiving treatment at the selected clinics, on stable medication for $\geq$ 3 months prior to recruitment, uncontrolled glycaemic control, in possession of a mobile phone, able to retrieve and read SMSs and willing to receive SMSs<br><br>health or mental conditions that could interfere with the study, pregnant or planning to get pregnant within the next 6 months, debilitated or handicapped in such a way that obtaining anthropometric measurements could be | n=216<br>84.3 % females<br>age (yrs): 60.6 $\pm$ 11.6<br>DM2 (%): 94<br>Treated with oral pills (%): 75.5<br>Duration of DM (yrs): 9.1 $\pm$ 7.4<br>Duration of DM treatment (yrs): 8.8 $\pm$ 7.2<br>Hypertension (%): 83.0<br>Random blood glucose (mmol/L): 14.34 $\pm$ 3.9<br>BMI(kg/m <sup>2</sup> ): 32.2 $\pm$ 6.2 | <u>IG (n=108):</u><br>daily SMS text-messaging SMS at an agreed time of the day, according to their needs, care plan and goal with motivational and support messages, advice on lifestyle behaviours (e.g. diets, physical activity, smoking cessation, medication and appointment reminders)<br>vs.<br><u>CG (n=108):</u><br>usual diabetes care<br><u>Duration:</u> 6 months | <u>Primary:</u> Morning random blood sugar<br><u>Secondary:</u><br>co-morbid outcomes (hypertension and obesity), obtained through blood pressure measurement, anthropometric measurements (body weight, BMI) acceptability, feasibility | Over 6 months:<br><u>Blood glucose levels (mmol/L):</u><br>-1.58 $\pm$ 5.29 vs. -1.95 $\pm$ 4.69; MD 0.51(-0.8 to 1.82), MD <sub>a</sub> 0.26 (-0.81 to 1.32) |

| Study name<br>registration<br>number<br>Design | Setting<br>Place,<br>setting and<br>time                        | Population<br>Inclusion / Exclusion criteria                                                                                                                                                                                                                                                                                                                                     | Characteristics                                                                                                                                                                                                                                   | Intervention vs. Control<br>Description with duration                                                                                                                                                                                                                                                                                                                           | Outcomes<br>Primary and secondary                                                                                                      | Results<br>Longest follow-up period with<br>intervention effects (IG vs. CG) with<br>SD, 95%-CI or p value                                                                          |
|------------------------------------------------|-----------------------------------------------------------------|----------------------------------------------------------------------------------------------------------------------------------------------------------------------------------------------------------------------------------------------------------------------------------------------------------------------------------------------------------------------------------|---------------------------------------------------------------------------------------------------------------------------------------------------------------------------------------------------------------------------------------------------|---------------------------------------------------------------------------------------------------------------------------------------------------------------------------------------------------------------------------------------------------------------------------------------------------------------------------------------------------------------------------------|----------------------------------------------------------------------------------------------------------------------------------------|-------------------------------------------------------------------------------------------------------------------------------------------------------------------------------------|
|                                                |                                                                 | challenging                                                                                                                                                                                                                                                                                                                                                                      |                                                                                                                                                                                                                                                   |                                                                                                                                                                                                                                                                                                                                                                                 |                                                                                                                                        |                                                                                                                                                                                     |
| <b>Sodipo 2017</b><br>RCT                      | Nigeria,<br>primary<br>care,<br><br>03/2013-<br>11/2013         | DM2 ≥ 18 yrs. on antidiabetic<br>medication<br><br>no patients with<br>emergencies, chronic<br>complications such as<br>nephropathy, neuropathy<br>etc., those already using<br>glucometer                                                                                                                                                                                       | n=120<br>gender: 50% female<br>age (yrs): 59±10.95<br>HbA1c (%): 8.7±2.45<br>fasting glucose<br>(mg/dl): 152±60.9<br>duration of diabetes<br>(yrs): 50%> 3yrs                                                                                     | <u>IG (n=60):</u><br>Self-monitoring of blood<br>glucose before and after<br>meals 3 days a week for<br>12 weeks<br><u>CG (n=60); non SMBG</u><br><u>Duration: 12 wks</u>                                                                                                                                                                                                       | HbA1C, fasting glucose                                                                                                                 | after 3 months:<br><u>HbA1c (%):</u><br>No difference: 7.2±2.0 vs. 7.7±2.0 (p=<br>0.174)<br>fasting glucose (mg/dl):<br>No difference: 123.2±35.1 vs.<br>137.6±50.1 (p=0.087)       |
| <b>Steyn 2013</b><br><br>Cluster-RCT           | South<br>Africa,<br>urban,<br>primary<br>care,<br><br>1999-2000 | public sector primary health<br>care clinics (CHC) with ≥ 25<br>diabetes and ≥ hypertension<br>patients<br>age ≥15yrs, a documented<br>attende at the particular<br>CHC with ≥ 4 visits during the<br>previous year for<br>hypertension or diabetes who<br>received treatment for these<br>conditions at each visit<br><br>no patients being unable to<br>answer a questionnaire | 18 community health<br>centres<br>n=1096, of them<br>n= 456 with DM<br>age (yrs): 58.3 ± 11<br>gender:74 % females<br>BMI (kg/m <sup>2</sup> ):<br>30.7 ± 6.2<br>Type of Diabetes:<br>• DM1: 5.8%<br>• DM2: 91.35%<br>uncertain DM type:<br>2.85% | <u>IG (9 clinics, n=229):</u><br>introduction of structured<br>clinical record with<br>guidelines prompts after<br>training of doctors in<br>their use and suggestions<br>to incorporate them in<br>regular patient records,<br>contact over 1 year<br>vs.<br><u>CG (9 clinics, n= 227):</u><br>usual care with passively<br>disseminated guidelines<br><u>Duration: 1 year</u> | <u>primary:</u> HbA1C in the<br>diabetes group<br><u>secondary:</u><br>uncontrolled glycaemia<br>(HbA1c ≥7%) in the<br>diabetes group. | After 3 months:<br><u>HbA1c (%):</u><br>IG: 8.8% vs. 8.8%; MDa -1.0 (-1.1 to -<br>0.9)<br><u>HbA1c ≥7% (%):</u><br>no relevant difference: 64.1 vs. 62.6;<br>MD 0.90 (0.53 to 1.53) |
| <b>Takenga 2014</b><br><br>RCT                 | Congo,<br>urban                                                 | DM2, 35-75 yrs                                                                                                                                                                                                                                                                                                                                                                   | n=40<br>20 % females<br>age (yrs): 53.3 ± 10.1<br>HbA1c (%): 8.63                                                                                                                                                                                 | <u>IG (n=20):</u><br>self-management of<br>diabetes with Mobil DIAB<br>(telemedical approach)<br><br>vs.<br><u>CG (n=20):</u><br>conventional therapy<br>without telemedical<br>system                                                                                                                                                                                          | <u>primary:</u> HbA1c                                                                                                                  | after 2 months:<br><u>HbA1c (%):</u><br>Benefit for IG: 6.73±1.59 vs. vs.<br>8.6±1.35 (MD -1.87 (-2.91 to -0.83)                                                                    |

| Study name<br>registration<br>number<br>Design            | Setting<br>Place,<br>setting and<br>time                          | Population<br>Inclusion / Exclusion criteria                                                                                                                                                                                                                                                        | Population<br>Characteristics                                                                                                                                                                                                                                                                                                    | Intervention vs. Control<br>Description with duration                                                                                                                                                                               | Outcomes<br>Primary and secondary                                                                                                                                                                               | Results<br>Longest follow-up period with<br>intervention effects (IG vs. CG) with<br>SD, 95%-CI or p value                                                                                                                                                                                                                                                                                                                                                                                         |
|-----------------------------------------------------------|-------------------------------------------------------------------|-----------------------------------------------------------------------------------------------------------------------------------------------------------------------------------------------------------------------------------------------------------------------------------------------------|----------------------------------------------------------------------------------------------------------------------------------------------------------------------------------------------------------------------------------------------------------------------------------------------------------------------------------|-------------------------------------------------------------------------------------------------------------------------------------------------------------------------------------------------------------------------------------|-----------------------------------------------------------------------------------------------------------------------------------------------------------------------------------------------------------------|----------------------------------------------------------------------------------------------------------------------------------------------------------------------------------------------------------------------------------------------------------------------------------------------------------------------------------------------------------------------------------------------------------------------------------------------------------------------------------------------------|
| <u>Duration:</u> 60 days                                  |                                                                   |                                                                                                                                                                                                                                                                                                     |                                                                                                                                                                                                                                                                                                                                  |                                                                                                                                                                                                                                     |                                                                                                                                                                                                                 |                                                                                                                                                                                                                                                                                                                                                                                                                                                                                                    |
| <b>Tawfik 2016</b><br><br>RCT                             | Egypt,<br>urban,<br>primary<br>care,<br><br>05/2015-<br>09/2015   | DM2 for ≥ 1 yr, 40-79 yrs<br>attending an outpatient clinic<br><br>no patients who were already<br>using a similar medication<br>chart, severe or terminal<br>health conditions, or patients<br>with behavioural health issue<br>that could make it difficult to<br>understand the<br>communication | n=255<br>53.7 % females<br>age (yrs): 55.7±8.35<br>HbA1c (%): 8.14±1.3<br>duration of diabetes<br>(yrs): 8.3±1.3                                                                                                                                                                                                                 | <u>IG (n=127):</u><br>comprehensive<br>cardiovascular risk<br>communication<br>vs.<br><u>CG (n=128):</u><br>standard usual care<br><u>Duration:</u> 3 months                                                                        | <u>Primary:</u> HbA1c<br><u>Secondary:</u><br>Cardiovascular risk<br>perception, diabetes self-<br>care, cardiovascular risk<br>scores                                                                          | After 3 months:<br><u>HbA1c (%):</u><br>Benefit for IG: 7.5±0.8 vs. 8.12±0.9;<br>MD -0.62 (-0.85 to -0.39)<br><u>controlled HbA1c (%):</u><br>32.7 vs. 29.9                                                                                                                                                                                                                                                                                                                                        |
| <b>Thuita 2020</b><br>PACTR201910<br>518676391<br><br>RCT | Kenya<br>Secondary<br>care<br>recruitment<br>08/2016 -<br>10/2016 | DM2, 20-79 yrs with regular<br>attendance of an outpatient<br>clinic<br><br>Pregnancy, complications<br>such as renal failure,<br>congestive heart failure, or<br>stroke                                                                                                                            | n=153<br>59.5 % females<br>age (yrs). 56±11.6<br>Family history of DM<br>(%): 46.6<br>Poor glycaemic<br>control (%) with<br>HbA1c>7%: 77.8<br>DM for 1-5 yrs (%):<br>58.2 %<br>Years with DM:<br>6.7±6.9<br>Oral medications (%):<br>82.4<br>BMP (kg/m2): 27±4.6<br>HbA1c (%): 8.49±1.9<br>fasting glucose<br>(mmol/l): 11.0±3.3 | <u>IG2 (n=51):</u><br>nutrition education<br>programme for 2 hrs<br>/week with peer-to-peer<br>support<br>vs.<br><u>IG1 (n=51):</u><br>Education programme<br>vs.<br><u>CG (n=51):</u><br>Standard care<br><u>Duration:</u> 8 weeks | <u>Primary:</u> metabolic<br>syndrome prevalence<br>(MetS)<br><u>Other:</u> anthropometry<br>and clinical data, blood<br>pressure, blood glucose<br>and lipid profile, physical<br>activity levels, food intake | After 6 months:<br><u>Metabolic syndrome prevalence:</u> lower<br>with IG2:<br>Harmonized criteria:52.1 vs.69.4 vs.<br>91.3 (p<0.001)<br>WHO: 58.3 vs. 77.6 vs. 89.1 (p=0.003)<br><u>HbA1c (%):</u><br>Mean change: no differences -<br>2.04±2.70 vs. 1.48±2.73 vs. -0.73±2.71<br>High HbA1c: no differences: 47.9 vs.<br>29.0 vs. 34.8 %<br><u>fasting glucose (mmol/l):</u><br>no differences: -2.59±0.66 vs. -<br>2.95±0.64 vs. -1.55±0.68<br>high fasting glucose: 79.2 vs. 83.7 vs.<br>91.3 % |

| Study name                                         | Setting                                                   | Population                                                                                                                                                                                                                               | Intervention vs. Control                                                                                                                                                                                                                                                                                                                                              | Outcomes                                                                                                                                                                                                                                                                                                                                               | Results                                                                                                                                                                                                                                                            |                                                                                                                                                                                                                                                                                                                                                                                                                                                                                                               |
|----------------------------------------------------|-----------------------------------------------------------|------------------------------------------------------------------------------------------------------------------------------------------------------------------------------------------------------------------------------------------|-----------------------------------------------------------------------------------------------------------------------------------------------------------------------------------------------------------------------------------------------------------------------------------------------------------------------------------------------------------------------|--------------------------------------------------------------------------------------------------------------------------------------------------------------------------------------------------------------------------------------------------------------------------------------------------------------------------------------------------------|--------------------------------------------------------------------------------------------------------------------------------------------------------------------------------------------------------------------------------------------------------------------|---------------------------------------------------------------------------------------------------------------------------------------------------------------------------------------------------------------------------------------------------------------------------------------------------------------------------------------------------------------------------------------------------------------------------------------------------------------------------------------------------------------|
| registration number<br>Design                      | Place, setting and time                                   | Inclusion / Exclusion criteria<br>Characteristics                                                                                                                                                                                        | Description with duration                                                                                                                                                                                                                                                                                                                                             | Primary and secondary                                                                                                                                                                                                                                                                                                                                  | Longest follow-up period with intervention effects (IG vs. CG) with SD, 95%-CI or p value                                                                                                                                                                          |                                                                                                                                                                                                                                                                                                                                                                                                                                                                                                               |
| <b>Webb 2015</b><br>NCT01275040<br><br>Cluster RCT | South Africa, urban, primary care,<br><br>06/2010-03/2011 | primary health care clinics, patients with clinical diagnosis of DM2 or DM1 for ≥5yrs, age ≥ 18 yrs                                                                                                                                      | n= 12 primary health care clinics<br>n= 599<br>gender:68.5 % female<br>age (yrs): 57.8±10.5<br>HbA1c (%): 8.73±2.3<br>HbA1c ≥ 7 %: 73 %<br>BMI (kg/m <sup>2</sup> ): 30.8±6.7<br>Typ of diabetes:<br>• DM1: 3.7 %,<br>• DM2: 70.3 %<br>• unknown: 26 %<br>duration of Diabetes:<br>• < 5 yrs: 47.3 %<br>• 5-10 yrs: 22.0 %<br>• > 10 yrs: 20.2 %<br>• unknown: 10.5 % | <b>IG (n=328):</b><br>mobile screening team visits primary care clinic and provides education and active screening for diabetic complications (foot, kidney, cardiac and renal complications) vs.<br><b>CG(n=273):</b><br>no mobile screening team, routine care with similar education for patients. and health care workers<br><b>Duration:</b> 1 yr | <b>Primary:</b> HbA1c, detected neuropathy, nephropathy and retinopathy, HbA1c categories<br><b>Secondary:</b> detected complications, referred patients for complication assessment or care, blood pressure and lipid control, costs, LDL cholesterol, creatinine | after 12 months<br><b>HbA1c (%):</b><br>no difference: 8.54±2.11 vs. 8,76 ±2.2, MD-0.22 (-0.64, 0.20)<br><b>screening rate for complications:</b> in IG 60% increase of screening in all complication indicator groups, in both groups testing of HbA1c and renal complications (serum-creatinine) increased , but no significant difference , screening for eye complications, only increased significantly in IG<br>no significant difference in the proportion of actions taken between IG and CG (p=0.83) |
| <b>Strategies to enhance physical activity</b>     |                                                           |                                                                                                                                                                                                                                          |                                                                                                                                                                                                                                                                                                                                                                       |                                                                                                                                                                                                                                                                                                                                                        |                                                                                                                                                                                                                                                                    |                                                                                                                                                                                                                                                                                                                                                                                                                                                                                                               |
| <b>Asuako 2017</b><br><br>RCT                      | Ghana, urban, tertiary care,<br><br>08/2015-03/2016       | DM, age: 20-68 yrs, ambulant patients, without diabetes complications with < 150 minutes /wk of moderate physical activity<br>no SBP > 140 or DBP> 90 mmHg, bilateral or unilateral lower or upper limbs amputation, use of insulin pump | n=12<br>83% female<br>age (yrs): 83% were 46-55 yrs.<br>BMI (kg/m <sup>2</sup> ):25.4±4.5<br>fasting glucose (mmol/l):9.33 ± 5.7<br>type of diabetes:<br>DM1: 17 %<br>DM2: 83 %<br>duration of diabetes (yrs):<br>• 1-5 yrs: 25 %<br>• 6-10 yrs: 50 %<br>• 10 yrs: 25 %                                                                                               | <b>IG (n=7):</b><br>walking aerobic exercise sessions without treadmills (3/week) vs.<br><b>CG (n=5):</b><br>only activity of daily living<br><br>Both continued regular medical/clinical routines<br><b>Duration:</b> 8 weeks                                                                                                                         | FPG, Lipid profile, body weight, BMI<br><br>Change over 2 months:<br><b>FPG (mmol/l):</b><br>Benefit for IG: 6.27 ± 0.91 vs. 8.00 ± 0.96; MD 1.73 (-1.88 to -1.59; p<0.001)                                                                                        |                                                                                                                                                                                                                                                                                                                                                                                                                                                                                                               |

| Study name<br>registration<br>number<br>Design | Setting<br>Place,<br>setting and<br>time             | Population<br>Inclusion / Exclusion criteria<br>Characteristics                                                                                                                                                                                                                    | Intervention vs. Control<br>Description with duration                                                                                                                                                     | Outcomes<br>Primary and secondary                                                                                                                                                                                                                                  | Results<br>Longest follow-up period with<br>intervention effects (IG vs. CG) with<br>SD, 95%-CI or p value                                                                                                                                                                                                                                                                                                              |
|------------------------------------------------|------------------------------------------------------|------------------------------------------------------------------------------------------------------------------------------------------------------------------------------------------------------------------------------------------------------------------------------------|-----------------------------------------------------------------------------------------------------------------------------------------------------------------------------------------------------------|--------------------------------------------------------------------------------------------------------------------------------------------------------------------------------------------------------------------------------------------------------------------|-------------------------------------------------------------------------------------------------------------------------------------------------------------------------------------------------------------------------------------------------------------------------------------------------------------------------------------------------------------------------------------------------------------------------|
| <b>Fayehun 2018</b>                            | Nigeria,<br>urban<br>06/2014-<br>11/2014             | DM2, age 18-64 yrs,<br>Diagnosed $\geq$ 12 months, non-<br>insulin dependent, on dietary<br>control $\pm$ hypoglycemic<br>agents, able to walk without<br>limitations<br><br>no pregnant women,<br>smokers, prescription of<br>medications that might<br>impair ability to walk    | n= 46<br>63 % female<br>age (yrs): 54 $\pm$ 7.7 (33-<br>64)<br>BMI (kg/m <sup>2</sup> ):<br>22.4 $\pm$ 3.3<br>HbA1c (%): 6.6 (5.3-<br>9.0)<br>duration of diabetes<br>(yrs): <7 yrs: 70 %,<br>>7 yrs 30 % | <u>IG (n=23):</u><br>Goal to accumulate<br>10000 steps per day<br>vs.<br><u>CG (n=23):</u><br>normal activity habits<br><u>Duration:</u> 10 weeks                                                                                                                  | <u>Primary:</u> HbA1c<br><u>Secondary:</u> step count<br><br>Change over 2.5 months:<br><u>HbA1c (%):</u><br>Benefit for IG: 6.26 (6.19 to 6.33) vs.<br>6.82 (6.69 to 6.95); MD <sub>a</sub> : -0.74 (-1.32<br>to -0.02; p=0.015)                                                                                                                                                                                       |
| <b>Maharaj 2016</b><br><br>RCT                 | Nigeria,<br>rural<br><br>07/2013-<br>06/2014         | DM2, non- insulin dependent,<br>blood glucose levels 6 -<br>13 mmol/l<br><br>no cardiac, abdominal or<br>spinal surgery $\leq$ 6 months,<br>history of fractures of lower<br>limbs, spine, weakness,<br>deformities, loss of sensation<br>in the feet, retinopathy,<br>nephropathy | n=90<br>52 % females<br>age (yrs): 39.4 $\pm$ 8.6<br>(30-58)<br>BMI (kg/m <sup>2</sup> ): 27.7 $\pm$ 5.8<br>HbA1c (%): 8.79 $\pm$ 2.11<br>duration of diabetes<br>(yrs): 2.5 $\pm$ 2.1                    | <u>IG (n=45):</u><br>rebound exercise 3<br>times/week for 20-<br>30 min, moderate<br>intensity of 40-60 % of HR<br>maximum<br>vs.<br><u>CG (n=45):</u><br>watched videos and read<br>health magazines<br><u>Duration:</u> 9 weeks                                  | <u>Primary:</u><br>HbA1c , FPG, BMI<br><u>Other:</u><br>Heart and respiratory<br>rates, blood pressure,<br>oxygen saturation<br><br>After 9 weeks<br><u>HbA1c (%):</u><br>Benefit for IG: 7.12 $\pm$ 1.19 vs. 8.36 $\pm$ 1.25;<br>MD <sub>a</sub> : 0.904 (0.832 to 0.984; p=0.017)<br><u>FPG (mmol/l):</u><br>Benefit for IG: 6.92 $\pm$ 1.21 vs. 8.73 $\pm$ 1.23;<br>MD <sub>a</sub> : 0.787 (0.7345- 0.841; p=0.002) |
| <b>van Rooijen<br/>2004</b><br><br>RCT         | South<br>Africa,<br>urban<br><br>03/2002-<br>11/2002 | black women with DM2, age<br>40-65yrs, duration of DM $\geq$ 12<br>months<br><u>no</u> chest pain on effort,<br>possible previous myocardial<br>infarction and intermittent<br>claudication, cerebro-<br>vascular incidents, arthritis,<br>retinopathy                             | n=158<br>gender:100 % females<br>age (yrs): 54-55<br>HbA1c (%): 9.35                                                                                                                                      | <u>IG (n=80):</u><br>education+ incremental<br>daily home exercise, use<br>of daily physical activity<br>records+6 fortnightly<br>supervised aerobic<br>exercise classes<br>vs.<br><u>CG(n=77):</u><br>education+ relaxation<br>exercise<br><u>Duration:</u> 12wks | <u>Primary:</u> HbA1c, BMI<br><u>Secondary:</u> walking<br>distance (6 min walk)<br><br>Change over 3 months:<br><u>HbA1c (%):</u><br>no difference: 8.99 $\pm$ 2.59 vs. 8.26 $\pm$ 1.97                                                                                                                                                                                                                                |
| <b>Yan 2014</b>                                | Mozambiqu<br>e,                                      | DM2, male, age 40-70 yrs,<br>diagnosis for $\geq$ 12 months                                                                                                                                                                                                                        | n=41<br>100% male                                                                                                                                                                                         | <u>IG (n=31):</u><br>low or vigorous intensity                                                                                                                                                                                                                     | plasma glucose, HbA1c<br><br>Change over 3 months:<br><u>HbA1c (%):</u>                                                                                                                                                                                                                                                                                                                                                 |



1  
2  
3  
4  
5  
6  
7  
8  
9  
10  
11  
12  
13  
14  
15  
16  
17  
18  
19  
20  
21  
22  
23  
24  
25  
26  
27  
28  
29  
30  
31  
32  
33  
34  
35  
36  
37  
38  
39  
40  
41  
42  
43  
44  
45  
46

| Study name                        | Setting                 | Population                                                                                                                                                          | Intervention vs. Control                                                                                                | Outcomes                                                                                                                                                                                                                              | Results                                                                                                                                                                                                                                                                                |
|-----------------------------------|-------------------------|---------------------------------------------------------------------------------------------------------------------------------------------------------------------|-------------------------------------------------------------------------------------------------------------------------|---------------------------------------------------------------------------------------------------------------------------------------------------------------------------------------------------------------------------------------|----------------------------------------------------------------------------------------------------------------------------------------------------------------------------------------------------------------------------------------------------------------------------------------|
| registration number               | Place, setting and time | Inclusion / Exclusion criteria                                                                                                                                      | Description with duration                                                                                               | Primary and secondary                                                                                                                                                                                                                 | Longest follow-up period with intervention effects (IG vs. CG) with SD, 95%-CI or p value                                                                                                                                                                                              |
| RCT                               | urban                   | no known diseases other than DM2 and hypertension, no diagnosed cardiovascular diseases                                                                             | age(yrs): 54±2.5<br>HbA1c: 8.6±0.7<br>plasma glucose (mmol/l): 9.65±1.2<br>BMI ( kg/m <sup>2</sup> ): 27.1 ± 1.0        | exercise 3-5 times/week vs.<br><u>CG(n=10):</u><br>walked 1 hour per day as part of their daily lifestyle<br><u>Duration:12 wks</u>                                                                                                   | reduction in both groups with no differences between groups: 7.7±0.4 vs. 7.7±0.8<br><u>Plasma glucose (mmol/l):</u><br>9.6 ± 0.7 vs. 11.1 ± 1.3                                                                                                                                        |
| <b>Pharmacological strategies</b> |                         |                                                                                                                                                                     |                                                                                                                         |                                                                                                                                                                                                                                       |                                                                                                                                                                                                                                                                                        |
| <b>Distiller 2014</b>             | South Africa            | DM2 for ≥ 1 year with total insulin requirement of >200 U/d for ≥ 3 months, BMI > 30 kg/m <sup>2</sup> , HbA1c> 7,5 %, on long-term metformin therapy (1.7–2.5 g/d) | n=28<br>50% female<br>age (yrs): 51.7 (36-71)<br>HbA1c (%): 8.95 (7.6-11.3)<br>BMI (kg/m <sup>2</sup> ): 40.8 (31.2-47) | <u>IG (n=14):</u><br>regular Insulin (500 U/ml) + metformin + exenatide (5 µg orally twice a day for 1 month and titrated to 10 µg)<br>vs.<br><u>CG (n=14):</u><br>regular Insulin (500 U/ml) +metformin<br><u>Duration: 6 months</u> | Change to 6 months:<br><u>HbA1c (%):</u><br>Significant improvement in both groups<br>8.7→7.7(p=0.002) vs. 9.2→7.5 (p=0.0001)<br>With no difference between groups (MD: 0.28; p=0.80)<br><u>Complications:</u><br>Mild hypoglycaemia: 5 vs. 2 persons with 20 vs. 5 events (p ≤ 0.001) |
| <b>EI-Haggar 2015</b>             | Egypt, urban            | DM2, age: 45-55 yrs, obese (BMI≥30 kg/m <sup>2</sup> ), with duration 5-10 yrs, treated with glimepiride alone                                                      | n=48<br>79 % female<br>age (yrs): 50.1±4.6<br>HbA1c (%): 7.83±0.87<br>fasting glucose (mg/dl): 193±50                   | <u>IG1 (n=16):</u><br>glimepiride (3 mg/d) + 2 (1 mg twice/d)<br>vs.<br><u>IG2 (n=16):</u><br>glimepiride (3 mg/d) +                                                                                                                  | Changes over 12 weeks:<br><u>HbA1c (%):</u><br>• Highest benefit for IG1: 7.1±0.86 vs. 8.2±0.82 vs. 8.7±0.93 (p< 0.05)<br><u>fasting glucose (mg/dl):</u><br>• Highest benefit for IG1: 199±38 vs.                                                                                     |

| Study name<br>registration<br>number<br>Design | Setting<br>Place,<br>setting and<br>time                                  | Population<br>Inclusion / Exclusion criteria                                                                                                                                                                                                                                                                                                                                                                                                                         | Characteristics                                                                                                                                     | Intervention vs. Control<br>Description with duration                                                                                                                                                                                                  | Outcomes<br>Primary and secondary                                                                                | Results<br>Longest follow-up period with<br>intervention effects (IG vs. CG) with<br>SD, 95%-CI or p value                                                                                                                                                                                                                                                                                                       |
|------------------------------------------------|---------------------------------------------------------------------------|----------------------------------------------------------------------------------------------------------------------------------------------------------------------------------------------------------------------------------------------------------------------------------------------------------------------------------------------------------------------------------------------------------------------------------------------------------------------|-----------------------------------------------------------------------------------------------------------------------------------------------------|--------------------------------------------------------------------------------------------------------------------------------------------------------------------------------------------------------------------------------------------------------|------------------------------------------------------------------------------------------------------------------|------------------------------------------------------------------------------------------------------------------------------------------------------------------------------------------------------------------------------------------------------------------------------------------------------------------------------------------------------------------------------------------------------------------|
|                                                |                                                                           | severe hepatic or renal<br>disease, epilepsy<br>pregnant/lactating females                                                                                                                                                                                                                                                                                                                                                                                           | BMI (kg/m <sup>2</sup> ):<br>37.6±4.6<br>duration of diabetes<br>(yrs): 7.7 ±2.6                                                                    | ketotifen (1 mg once/d)<br>vs.<br>CG (n=16):<br>gliimepiride (3 mg/d)<br>alone<br>Duration: 12 weeks                                                                                                                                                   | BMI                                                                                                              | 207.7± 47.6 (p< 0.05)                                                                                                                                                                                                                                                                                                                                                                                            |
| <b>Malek 2015</b><br><br>RCT                   | Egypt,<br>Algeria,<br>Tunisia,<br>South Africa<br><br>03/2010-<br>05/2012 | DM2, age ≥ 18 yrs, currently<br>treated with suboptimal dose<br>of oral anti-diabetic drugs;<br>HbA1c 7-11 % (under<br>metformin-monotherapy)<br>and ≤ 10 % (under<br>combination therapy),<br>BMI≤40 kg/m <sup>2</sup><br><br>no allergies or<br>contraindications to the<br>product, pregnant or<br>breastfeeding, impaired<br>hepatic or renal function,<br>cardiovascular history,<br>uncontrolled hypertension,<br>proliferative retinopathy,<br>macular oedema | n=403<br>age (yrs): 52.8±9.6<br>59.8 % female<br>HbA1c (%): 8.65<br>BMI (kg/m <sup>2</sup> ):<br>29.7±4.5<br>duration of diabetes<br>(yrs): 7.5±5.1 | Stepwise individual<br>insulin intensification of<br>IG (n=200):<br>basal-bolus insulin<br>analogues (insulin<br>detemir +Insulin aspart)<br>vs.<br>CG (n=203):<br>thrice daily biphasic<br>insulin aspart depending<br>on HbA1c-values over<br>50 wks | <u>Primary:</u><br>HbA1c<br><u>Secondary:</u><br>patients achieving HbA1c<br>< 7.0 %, prandial plasma<br>glucose | Change over 50 weeks:<br><u>HbA1c (%)</u> :<br>Non-inferiority: 7.4 vs. 7.3; MD 0.1 (-<br>0.1 to 0.3 (full-analysis set), MD 0.2 (-<br>0.1 to 0.4 (per protocol)<br>40.3% and 44.9% achieved<br>HbA1c<7.0%<br><u>Hypoglycaemia (events/patient year)</u> :<br>9.4 vs. 9.8<br><u>Serious adverse events</u> :<br>6.5 vs. 3.4 % with 1 treatment-related<br>SAE in CG<br><u>Adverse events</u> :<br>58.5 vs. 63.1% |
| <b>Strategies on food supplementation</b>      |                                                                           |                                                                                                                                                                                                                                                                                                                                                                                                                                                                      |                                                                                                                                                     |                                                                                                                                                                                                                                                        |                                                                                                                  |                                                                                                                                                                                                                                                                                                                                                                                                                  |

| Study name<br>registration<br>number<br>Design | Setting<br>Place,<br>setting and<br>time                     | Population<br>Inclusion / Exclusion criteria                                                                                                                                                                                                                                                                                                                                                                                                                                                                                                   | Characteristics                                                                                                                                                                                                                     | Intervention vs. Control<br>Description with duration                                                                                                                                                                                                                                                                                                                                                              | Outcomes<br>Primary and secondary                                                                                                                                                                                                                                  | Results<br>Longest follow-up period with<br>intervention effects (IG vs. CG) with<br>SD, 95%-CI or p value                                                                                                                                                                                                                                                                                                                            |
|------------------------------------------------|--------------------------------------------------------------|------------------------------------------------------------------------------------------------------------------------------------------------------------------------------------------------------------------------------------------------------------------------------------------------------------------------------------------------------------------------------------------------------------------------------------------------------------------------------------------------------------------------------------------------|-------------------------------------------------------------------------------------------------------------------------------------------------------------------------------------------------------------------------------------|--------------------------------------------------------------------------------------------------------------------------------------------------------------------------------------------------------------------------------------------------------------------------------------------------------------------------------------------------------------------------------------------------------------------|--------------------------------------------------------------------------------------------------------------------------------------------------------------------------------------------------------------------------------------------------------------------|---------------------------------------------------------------------------------------------------------------------------------------------------------------------------------------------------------------------------------------------------------------------------------------------------------------------------------------------------------------------------------------------------------------------------------------|
| <b>Ali 2019</b><br><br>RCT                     | Egypt<br>Urban,<br>tertiary care<br><br>09/2017 –<br>04/2018 | DM2, oral antidiabetic agents<br>with no change of type and<br>dosage of antidiabetic agents<br>in the past 3 months, ≥ 30<br>years<br><br>insulin-dependence,<br>pregnancy, lactation, use of<br>Ca, multivitamins, Vitamin D<br>supplements, use of drugs<br>that affect Vitamin D status,<br>dietary Ca intake > 1500<br>mg/d, hypo- or<br>hyperthyroidism,<br>smoking, use of antiepileptic<br>drugs, sarcoidosis,<br>tuberculosis, potentially<br>terminal illness, inflammatory<br>bowel disease, liver or kidney<br>disease, malignancy | n=85<br>age (yrs): 54.6 ±2.8<br>68 % females<br>BMI (kg/m <sup>2</sup> ): 28.6±3.3<br>Diabetic duration<br>(yrs): 4.4±2.1<br>fasting glucose<br>(mg/dL): 168±54.4<br>fasting serum insulin<br>(μU/mL): 18.1±8.3<br>HbA1c(%):8.8±1.8 | oral antidiabetic agents<br>as usual +<br><u>IG 1 (n=22):</u><br>continuous oral Vitamin<br>D3 (4000 IU/ d)<br>vs.<br><u>IG 2 (n=22):</u><br>intermittent regimen of<br>Vitamin D3 (50 000 IU/<br>week)<br>vs.<br><u>IG 3 (n=21):</u><br>single IM injection of<br>300 000 IU of Vitamin D3<br>at the start of the study<br>vs.<br><u>CG (n=20):</u> only oral<br>antidiabetic agents<br><u>Duration:</u> 3 months | Not specified: serum<br>creatinine, blood urea<br>nitrogen, total and<br>ionized Ca, serum<br>phosphorus, fasting<br>glucose, fasting<br>serum insulin, 25(OH)D3<br>levels, HbA1c                                                                                  | After 3 months:<br><u>fasting glucose</u> (mg/dL): higher<br>decrease in IG1 and IG2: -20.9±18.1 vs.<br>-23.0±37.9 vs. -3.5±6.9 vs. 1.0±5.6<br>(p<0.001)<br><u>fasting serum insulin</u> (μU/mL): higher<br>decrease in IG1 and IG2: -4.44±5.2 vs.-<br>5.88±4.6 vs. -1.55±9.4 vs. 0.10±1.0<br>(p< 0.001)<br><u>HbA1c (%)</u> :higher decrease in IG1 and<br>IG2: -0.81±0.77 vs. -0.82±0.87 vs. -<br>0.34±1.47 vs. 0.05±0.08 (p<0.001) |
| <b>Anderson<br/>2001</b><br><br>RCT            | Tunesia,<br>urban                                            | DM2 ≥ 5y, age< 65 yrs,<br>fasting glucose > 8 mmol/l<br>and HbA1C > 7.5 %<br><br>no pregnant or lactating<br>women, receiving trace<br>element supplements in past<br>3 months, with gastric or<br>diuretic treatment, acute<br>renal, acute infection or<br>recent surgery                                                                                                                                                                                                                                                                    | n=110<br>age (yrs): 53.2 ±16.8<br>BMI (kg/m <sup>2</sup> ):<br>29.1±1.0<br>HbA1c (%):8.82±3.25<br>fasting glucose<br>(mmol/l): 11.45±0.<br>83<br>duration of diabetes<br>(months): 73.6±66                                          | <u>IG 1 (n=27):</u><br>Zinc (30 mg/d)<br>vs.<br><u>IG 2 (n=27):</u><br>Chromium (400 μg/d)<br>vs.<br><u>IG 3 (n=27):</u><br>Zinc (30 mg /d) +<br>Chromium (400 μg /d)<br>vs.<br><u>CG (n=29):</u><br>placebo<br><u>Duration:</u> 6 months                                                                                                                                                                          | Not specified:<br>HbA1C, fasting glucose<br>plasma concentrations of<br>zinc, copper, selenium,<br>urinary chromium and<br>zinc, Plasma<br>thiobarbituric acid<br>reactive substances,<br>copper-zinc-superoxid<br>dismutase, selenium -<br>glutathione peroxidase | Change over 6 months:<br><u>HbA1c (%)</u> :<br>7.7±1.6 vs. 7.4±1.4 vs. 8.1±1.6<br>CG: not reported                                                                                                                                                                                                                                                                                                                                    |
| <b>Anyanwu<br/>2016</b>                        | Nigeria,<br>urban                                            | DM2, age 35-65 yrs on oral<br>antidiabetics with vitamin D                                                                                                                                                                                                                                                                                                                                                                                                                                                                                     | n=42<br>57.6 % female                                                                                                                                                                                                               | <u>IG (n=21):</u><br>Vitamin D3 supplements                                                                                                                                                                                                                                                                                                                                                                        | <u>Primary:</u> HbA1c<br><u>Other:</u> fasting glucose,                                                                                                                                                                                                            | Changes over 12 wks:<br><u>HbA1c (%)</u> :                                                                                                                                                                                                                                                                                                                                                                                            |

| Study name<br>registration<br>number<br>Design | Setting<br>Place,<br>setting and<br>time                   | Population<br>Inclusion / Exclusion criteria                                                                                                                                                                                                                                                                                                                                                                                                                                                                                                                                                                                    | Characteristics                                                                                                                                                                             | Intervention vs. Control<br>Description with duration                                                                                                                                          | Outcomes<br>Primary and secondary                                                            | Results<br>Longest follow-up period with<br>intervention effects (IG vs. CG) with<br>SD, 95%-CI or p value                                                                                                                                                                                                                                                                                                        |
|------------------------------------------------|------------------------------------------------------------|---------------------------------------------------------------------------------------------------------------------------------------------------------------------------------------------------------------------------------------------------------------------------------------------------------------------------------------------------------------------------------------------------------------------------------------------------------------------------------------------------------------------------------------------------------------------------------------------------------------------------------|---------------------------------------------------------------------------------------------------------------------------------------------------------------------------------------------|------------------------------------------------------------------------------------------------------------------------------------------------------------------------------------------------|----------------------------------------------------------------------------------------------|-------------------------------------------------------------------------------------------------------------------------------------------------------------------------------------------------------------------------------------------------------------------------------------------------------------------------------------------------------------------------------------------------------------------|
| RCT                                            |                                                            | deficiency and poor glycemic control (HbA1c > 6.5 %)                                                                                                                                                                                                                                                                                                                                                                                                                                                                                                                                                                            | age (yrs): 51.8±2.05<br>HbA1c (%): 7.88<br>fasting glucose (mg/dl): 152.8±56.5                                                                                                              | (3000 IU/d)<br>vs.<br><u>CG(n=21):</u><br>placebo<br><u>Duration:</u> 12 weeks                                                                                                                 | levels of serum Vitamin D, calcium, albumin, phosphate, creatinine, and alanine transaminase | <ul style="list-style-type: none"> <li>• MD (IG vs. CG): -0.66 (-0.161 to 0.29) vs 0.38 (-0.08 to 0.84);</li> <li>• MD: -1.04 (-2.09 to 0.01)</li> <li>• change from poor glycemic control (HbA1c&gt;6.5 %) to normal HbA1c (%): benefit for IF: 33.3 vs. -9.1 (p&lt;0.05)</li> </ul> <u>fasting glucose (mg/dl):</u><br>137.2±33.6 vs. 154±67.5<br><u>patient adherence</u> (tablet counts, %):<br>62.2 vs. 59.9 |
| <b>El Gayar 2019</b><br><br>RCT                | Egypt,<br>urban,<br>outpatients<br><br>01/2017-<br>01/2018 | DM2 for < 6 months, 30-60 yrs, HbA1c level < 9%, BMI≥30 kg/m <sup>2</sup><br><br>no insulin therapy, any injectable or oral antidiabetic medication other than metformin, no smoking, consumption of alcohol or narcotic drugs, no acute illnesses at the baseline or during the study, no pregnancy or lactation, autoimmune disorder, cardiac or renal diseases, thyroid, chronic inflammatory diseases, peptic ulcer, regular consumption of ginger or other herbal drugs, hypersensitivity to ginger, consumption of lipid lowering drugs or oral contraceptive pills or any supplements 2 months before starting the study | n=80<br>49 % female<br>age (yrs): 46.2 ± 9.1<br>HbA1c (%): 8.04±0.5<br>fasting glucose (mg/dl): 176.9±18.3<br>Fasting serum insulin (mIU/L): 19.3±3.3<br>BMI (kg/m <sup>2</sup> ): 32.3±1.4 | diet, physical activity, and metformin<br><u>IG (n=40):</u><br>ginger powder supplementation (600 mg/capsule, 3 capsules/d)<br>vs.<br><u>CG (n=40):</u><br>Placebo<br><u>Duration:</u> 8 weeks | <u>Not specified:</u> glycemic status, lipid profile and beta-cell function                  | After 8 wks:<br><u>HbA1c (%)</u> :<br>decrease in both groups to 6.94±0.38 vs. 7.26±0.45<br><u>Fasting serum insulin</u> (mIU/L):<br>decrease in both groups to 12.86±2.59 vs. 13.21±2.08<br><u>fasting glucose</u> (mg/dl):<br>decrease in both groups to 120.88±9.06 vs. 151.70±13.23                                                                                                                           |

| Study name<br>registration<br>number<br>Design | Setting<br>Place,<br>setting and<br>time                     | Population<br>Inclusion / Exclusion criteria                                                                                                                                                                                                                                                                                                                                                                                                                                                                                                                       | Characteristics                                                                                                                                         | Intervention vs. Control<br>Description with duration                                                                                                                                                                    | Outcomes<br>Primary and secondary                                                                                                                                                                                                                   | Results<br>Longest follow-up period with<br>intervention effects (IG vs. CG) with<br>SD, 95%-CI or p value                                                                                                          |
|------------------------------------------------|--------------------------------------------------------------|--------------------------------------------------------------------------------------------------------------------------------------------------------------------------------------------------------------------------------------------------------------------------------------------------------------------------------------------------------------------------------------------------------------------------------------------------------------------------------------------------------------------------------------------------------------------|---------------------------------------------------------------------------------------------------------------------------------------------------------|--------------------------------------------------------------------------------------------------------------------------------------------------------------------------------------------------------------------------|-----------------------------------------------------------------------------------------------------------------------------------------------------------------------------------------------------------------------------------------------------|---------------------------------------------------------------------------------------------------------------------------------------------------------------------------------------------------------------------|
| <b>EI-Sheikh<br/>2019</b><br><br>RCT           | Egypt,<br>urban                                              | DM2 on glimepiride alone,<br>age ≥30 yrs<br><br>no insulin sensitizers,<br>steroids, NSAIDs, warfarin or<br>lipid lowering medications,<br>thyroid hormones, valproic<br>acid or suffered from: acute<br>or chronic inflammatory<br>diseases, end-stage renal<br>disease undergoing dialysis,<br>hypothyroidism epilepsy,<br>pregnant and breast-feeding<br>women                                                                                                                                                                                                  | n= 72<br>67 % female<br>age (yrs): 50.6±8.7<br>HbA1c (%):9.76±1<br><br>fasting glucose<br>(mg/dl):194.84±20.8<br>BMI (kg/m <sup>2</sup> ):<br>34.4±5.45 | <u>IG (n=38):</u><br>glimepiride 2 mg twice<br>daily + L-carnitine 1 gm<br>twice daily<br>vs.<br><u>CG (n=34):</u><br>glimepiride dose 2 mg<br>twice daily<br><u>Duration:</u> 6 months                                  | HbA1c, fasting glucose,<br>PPBG, fasting insulin,<br>extracellular part of<br>insulin regulated<br>aminopeptidase, tumor<br>necrosis factor-alpha,<br>visfatin and lipid panel,<br>BMI and homeostasis<br>model assessment of<br>insulin resistance | Change over 6 months:<br><u>HbA1c (%)</u> :<br>Benefit for IG: 7.41±0.5 vs. 9.5±0.78<br>(p<0.001)<br><u>fasting glucose (mg/dl)</u> :<br>Benefit for IG: 179.6±9.3 vs.<br>192.41±27.4 (p=0.018)                     |
| <b>Matter 2020</b><br>NCT03851055<br><br>RCT   | Egypt,<br>urban,<br>outpatients<br><br>08/2017 to<br>08/2018 | DM, treated with insulin, 10<br>to 18 yrs, transfusion<br>dependent beta-thalassemia<br>major<br><br>no other hemoglobinopathies<br>(e.g. a-thalassemia or sickle<br>thalassemia, disorders that<br>may affect glucose<br>homeostasis other than b-<br>TM, autoimmune diseases,<br>collagen diseases, hypo- or<br>hyperthyroidism, infections,<br>or tumours, or those who<br>were taking any vitamins or<br>food supplements < 1 month<br>before the study and<br>participating in a previous<br>investigational drug<br>study within 3 mo preceding<br>screening | n=80<br>52.5% females<br>age (yrs): 16.3±1.4<br>(range 12-18)<br>fasting glucose<br>(mg/dL): 144.5±22.4                                                 | diet schedule with<br>optimal macronutrient<br>distribution and<br>pharmacologic treatment<br><br><u>IG (n=40):</u><br>zinc gluconate<br>(2x20 mg/d)<br>vs.<br><u>CG (n=40):</u><br>placebo<br><u>Duration:</u> 3 months | <u>Primary:</u> fasting glucose<br><u>Secondary:</u> fructosamine,<br>fasting C-peptide, and<br>HOMA-IR<br><u>safety:</u> any AEs (e.g.<br>nausea, vomiting,<br>abdominal pain, diarrhea,<br>constipation, and<br>reduction of appetite)            | After 12 wks:<br>fasting glucose ( <u>mg/dL</u> ):<br>higher decrease with IG to 116.9±4.6<br>vs. 144.5±22.9 (p<0.001)<br><u>HbA1c (%)</u> :<br>higher in IG (no results reported)<br>no side effects were reported |
| <b>Moustafa</b>                                | Egypt,                                                       | DM2, newly diagnosed                                                                                                                                                                                                                                                                                                                                                                                                                                                                                                                                               | n=62                                                                                                                                                    | <u>IG (n=29, 21 analysed):</u>                                                                                                                                                                                           | Glycemic control,                                                                                                                                                                                                                                   | After 3 months:                                                                                                                                                                                                     |

| Study name<br>registration<br>number<br>Design | Setting<br>Place,<br>setting and<br>time                           | Population<br>Inclusion / Exclusion criteria                                                                                                                                                                                                                                                                           | Characteristics                                                                                                                                                                                                | Intervention vs. Control<br>Description with duration                                                                                                                                                                                 | Outcomes<br>Primary and secondary                                                                                                                    | Results<br>Longest follow-up period with<br>intervention effects (IG vs. CG) with<br>SD, 95%-CI or p value                                                                                                                                                                                                                                                                                                                                                                                                                                                                                                                                                       |
|------------------------------------------------|--------------------------------------------------------------------|------------------------------------------------------------------------------------------------------------------------------------------------------------------------------------------------------------------------------------------------------------------------------------------------------------------------|----------------------------------------------------------------------------------------------------------------------------------------------------------------------------------------------------------------|---------------------------------------------------------------------------------------------------------------------------------------------------------------------------------------------------------------------------------------|------------------------------------------------------------------------------------------------------------------------------------------------------|------------------------------------------------------------------------------------------------------------------------------------------------------------------------------------------------------------------------------------------------------------------------------------------------------------------------------------------------------------------------------------------------------------------------------------------------------------------------------------------------------------------------------------------------------------------------------------------------------------------------------------------------------------------|
| <b>2019</b><br><br>RCT                         | urban,<br>outpatients<br><br>recruitment<br>02/2016-<br>03/2018    | (within a time duration ≤6<br>months), 18–60 yrs<br><br>other antidiabetic<br>medications, pregnant and<br>lactating women, major<br>organ dysfunction (hepatic<br>failure, active hepatitis, liver<br>cirrhosis or renal<br>complications), changed their<br>standard medications during<br>the 12 weeks of the study | 72% females<br>HbA1c(%): 7.51±1.4<br>fasting glucose<br>(mg/dl): 154.4±51.6<br>BMI(kg/m <sup>2</sup> ): 33.9±6.1<br>family history of DM<br>(%): 78.5<br>retinopathy/altered<br>vision (%): 53<br>GDM (%): 9.2 | nigella sativa oil capsules<br>(3x 450 mg/d)<br>vs.<br><u>CG (n=33, 23 analysed):</u><br>metformin (2000 mg/d)<br><u>Duration:</u> 3 months                                                                                           | oxidative stress markers,<br>biochemical parameters,<br>weight/BMI/waist<br>circumference, total<br>antioxidant capacity TAC                         | <u>HbA1c (%)</u> :<br>no difference: 7.01±0.83 vs. 6.55±0.72<br><u>fasting glucose (mg/dl)</u> :<br>no difference: 119.8±23.7 vs.<br>120.7±25.4<br><u>Complications</u> :<br>no differences in occurrence of chills,<br>sweating, tachycardia, lethargy/<br>weakness, polydipsia, polyuria, dry<br>skin, polyphagia, blurred vision, foot<br>problems, or tingling/numbness<br>foot problems lower in IG: 4.8% vs.<br>33.3%, (p = 0.025).                                                                                                                                                                                                                        |
| <b>Ragheb 2020</b><br>NCT03437902<br><br>RCT   | Egypt,<br>urban,<br>outpatients<br>care<br><br>02/2019-<br>05/2018 | DM2, receiving standard oral<br>hypoglycemic agents,<br>≥ 35 yrs,<br><br>no history of overt vascular<br>disease, renal or hepatic<br>failure or antioxidant<br>supplementation or insulin<br>therapy, no change of oral<br>hypoglycemic drugs                                                                         | n=70<br>age (yrs): 54.9±8.4<br>70 % females<br>BMI (kg/m <sup>2</sup> ): 32.5±5.7<br>HbA1c(%): 8.50±1.86<br>fasting glucose<br>(mg/dl): 142.8±52.6                                                             | <u>IG2 (n=20):</u><br>Rutin (60) + vitamin C<br>(160 mg) 3x daily vs.<br><u>IG1 (n=20):</u><br>Vitamin C (500 mg) 1x<br>daily<br>vs.<br><u>CG (n=13):</u><br>only usual<br>oral antidiabetic<br>treatment<br><u>Duration:</u> 8 weeks | Primary: HbA1c,<br>oxidative stress marker,<br>antioxidant capacity,<br>insulin resistance, lipid<br>profile<br><u>Secondary:</u><br>Quality of life | After 2 months:<br><u>HbA1c (%)</u> :<br>no difference 7.494 ± 1.72 vs. 8.504 ±<br>2.059 vs. 8.504 ± 2.059 (p=0.1882)<br><u>fasting glucose (mg/dl)</u> :<br>lower in IG2 and CG: 111.3 (IQR 93.3-<br>135.2) vs. 144 (114.8-201) vs. 113.3<br>(94-152.2) (p=0.017)<br><u>Quality of life (SF 36)</u> :<br>• Benefit of physical functioning and<br>energy domains in IG2 vs. CG<br>(p=0.0049, p=0.0253).<br>• Benefit of role limitation to physical<br>health and emotional improved in<br>IG1 vs. CG (p=0.0267, p=0.0280)<br>• no difference between groups in<br>the other domains (emotional well-<br>being, social functioning, pain and<br>general health) |

1  
2  
3  
4  
5  
6  
7  
8  
9  
10  
11  
12  
13  
14  
15  
16  
17  
18  
19  
20  
21  
22  
23  
24  
25  
26  
27  
28  
29  
30  
31  
32  
33  
34  
35  
36  
37  
38  
39  
40  
41  
42  
43  
44  
45  
46

| Study name<br>registration<br>number<br>Design             | Setting<br>Place,<br>setting and<br>time             | Population<br>Inclusion / Exclusion criteria                                                                                                                                                                                                                                                                                                                              | Characteristics                                                                                                                                                                                                                                                        | Intervention vs. Control<br>Description with duration                                                                                                                                                                                                                                           | Outcomes<br>Primary and secondary                                                                                                                                                                                                 | Results<br>Longest follow-up period with<br>intervention effects (IG vs. CG) with<br>SD, 95%-CI or p value                                                                                                                       |
|------------------------------------------------------------|------------------------------------------------------|---------------------------------------------------------------------------------------------------------------------------------------------------------------------------------------------------------------------------------------------------------------------------------------------------------------------------------------------------------------------------|------------------------------------------------------------------------------------------------------------------------------------------------------------------------------------------------------------------------------------------------------------------------|-------------------------------------------------------------------------------------------------------------------------------------------------------------------------------------------------------------------------------------------------------------------------------------------------|-----------------------------------------------------------------------------------------------------------------------------------------------------------------------------------------------------------------------------------|----------------------------------------------------------------------------------------------------------------------------------------------------------------------------------------------------------------------------------|
| <b>Rashad 2017</b><br><br>RCT                              | Egypt,<br>urban                                      | DM2, 50-62 yrs<br><br>no insulin medication,<br>allergies, recent thromboses<br>or uncontrollable<br>hypertension                                                                                                                                                                                                                                                         | n=34<br>43.3 % female<br>age (yrs): 55.5±6.15<br>HbA1c (%):6.75±1.2<br>fasting glucose<br>(mmol/l): 8.5±1.4<br>postprandial plasma<br>glucose(mmol/l):<br>15.6±3.3<br>BMI (kg/m <sup>2</sup> ):28.55±4<br>type of diabetes<br>duration of diabetes<br>(yrs): 6.1 ± 2.2 | <u>IG (n=17):</u><br>Balanites aegyptiaca<br>extract (400 mg))<br>vs.<br><u>CG: (n=17)</u><br>placebo capsules (potato<br>maltodextrin)<br><u>Duration: 8 wks</u>                                                                                                                               | glycemic markers, lipid<br>profile, FPG                                                                                                                                                                                           | Change over 8 wks:<br><u>2h postprandial plasma glucose:</u><br>benefit for IG :26.88% decrease vs. CG<br>2.6% increase<br><u>FPG (mmol/l):</u><br>benefit for IG: 7.8 ± 0.9 vs. CG: 8.5 ±<br>1.1                                |
| <b>Somanah 2012</b><br>NCT01248143<br><br>RCT              | Mauritius,<br>urban/rural<br><br>11/2010-<br>03/2011 | newly diagnosed DM, age 25–<br>60 yrs fasting glucose range:<br>5.1–5.9 mmol/L<br><br>no secondary complications,<br>non-smoker or stopped for ><br>6 months , alcoholic<br>consumption < 2 standard<br>drinks/day, post-menopausal<br>women without hormone<br>replacement treatment, no<br>glucose-lowering,<br>cholesterol-lowering or anti-<br>hypertension treatment | n=127<br>47% female<br>age (yrs): range 25–60<br>HbA1c (%): 5.99±0.4<br>fasting glucose<br>(mg/dL): 93.2±8.0<br>BMI (kg/m <sup>2</sup> ): 26.6 ±<br>3.7                                                                                                                | <u>IG (n=44):</u><br>supplementation of a<br>fermented papaya<br>preparation (6g/d twice<br>daily, over 12 wks),<br>followed by a 2 week<br>wash out period with the<br>same amount of water<br>vs.<br><u>CG (n=56):</u> consumed an<br>equivalent amount of<br>water<br><u>Duration: 14wks</u> | HbA1C fasting glucose,<br>Lipid profile, diet score,<br>blood pressure, alanine<br>aminotransferase;<br>aspartate<br>aminotransferase,<br>Ferritin, c-reactive<br>protein, uric acid,<br>microalbumin/urinary<br>creatinine ratio | After 14 wks:<br><u>HbA1c (%):</u><br>no difference (p=0.448)<br><u>fasting glucose (mg/dL):</u><br>• remained relatively unchanged in<br>both genders:<br>• males: 96.2±17.0 vs. 87.6±11.7<br>• females: 95.6±15.8 vs. 94.3±5.0 |
| <b>Strategies on treatment of DM related complications</b> |                                                      |                                                                                                                                                                                                                                                                                                                                                                           |                                                                                                                                                                                                                                                                        |                                                                                                                                                                                                                                                                                                 |                                                                                                                                                                                                                                   |                                                                                                                                                                                                                                  |

| Study name<br>registration<br>number<br>Design        | Setting<br>Place,<br>setting and<br>time                        | Population<br>Inclusion / Exclusion criteria<br>Characteristics                                                                                                                                                                                                                                                                                                                                                                                                                                                                                                                                                                                                                            | Intervention vs. Control<br>Description with duration                                                                                                                                 | Outcomes<br>Primary and secondary                                                                                                                                                                                                                                                                                                                              | Results<br>Longest follow-up period with<br>intervention effects (IG vs. CG) with<br>SD, 95%-CI or p value                                                                                                                                            |
|-------------------------------------------------------|-----------------------------------------------------------------|--------------------------------------------------------------------------------------------------------------------------------------------------------------------------------------------------------------------------------------------------------------------------------------------------------------------------------------------------------------------------------------------------------------------------------------------------------------------------------------------------------------------------------------------------------------------------------------------------------------------------------------------------------------------------------------------|---------------------------------------------------------------------------------------------------------------------------------------------------------------------------------------|----------------------------------------------------------------------------------------------------------------------------------------------------------------------------------------------------------------------------------------------------------------------------------------------------------------------------------------------------------------|-------------------------------------------------------------------------------------------------------------------------------------------------------------------------------------------------------------------------------------------------------|
| <b>EI-Makaky<br/>2020</b><br>NCT03783845<br><br>RCT   | Egypt,<br>urban/rural<br><br>recruited<br>06/2015 to<br>03/2016 | DM2 for >5 yrs, 40-70 yrs,<br>HbA1c 7 to 9% at the last<br>medical evaluation, no<br>change in diabetes treatment<br>over the previous 3 months, ≥<br>6 permanent teeth excluding<br>third molars, clinical<br>attachment level and pocket<br>depth ≥4 mm in >30 % of the<br>sites, diagnosis of chronic<br>periodontitis based on the<br>presence of 4 teeth as a<br>minimum with ≥ 1 site<br><br>Pregnancy, alcoholism and<br>smoking, Presence of any<br>systemic disorders other than<br>hypertension and<br>diabetes, diabetic major<br>complications, antimicrobial<br>therapies or periodontal<br>therapies in the last 6<br>months, allergy to<br>metronidazole and<br>amoxicillin | n=88<br>56.8 % females<br>age (yrs): 52.6±6.8<br>HbA1c (%): 8.16±0.72                                                                                                                 | <u>IG (n=44):</u><br>immediate periodontal<br>therapy: one-stage<br>scaling and root planing,<br>a combination of<br>systemic antibiotics<br>(amoxicillin 500 mg and<br>metronidazole 400 mg<br>3x/day for 2 weeks), and<br>oral hygiene instructions<br>vs.<br><u>CG(n=44):</u><br>delayed periodontal<br>therapy after 3 months<br><u>Duration: 3 months</u> | <u>Primary:</u> HbA1c<br><u>Secondary:</u> not named<br><br>After 3 months:<br><u>HbA1c (%)</u> :<br>benefit for IG: 7.27±0.5 vs. 8.34±0.64:<br>MD -1.07 (-1.32 to -0.83)                                                                             |
| <b>EI-Sharkawy<br/>2016</b><br>NCT02794506<br><br>RCT | Egypt,<br>urban<br><br>06/2014-<br>03/2015.                     | DM2 >5 yrs, >20 teeth,<br>chronic moderate or severe<br>periodontitis with probing<br>depth and clinical attachment<br>level >5 mm, bleeding by<br>probing, on oral<br>hypoglycemic drug therapy<br>> 6 months,<br><br>no smoking, use of                                                                                                                                                                                                                                                                                                                                                                                                                                                  | n=50<br>34% female<br>age (yrs): 50.5 ± 7.4<br>(38 to 63)<br>HbA1c (%): 8.66 ±0.73<br>FPG (mg/dl): 183.5<br>±12.547<br>BMI (kg/m <sup>2</sup> ): 26.9±<br>3.1<br>duration of diabetes | <u>IG (n=24):</u> scaling and<br>root planing (SRP)+<br>400mg oral Propolis once<br>daily<br>vs.<br><u>CG (n=26)</u> scaling and<br>root planing<br>(SRP)+Placebo<br><u>Duration: 6 months</u>                                                                                                                                                                 | <u>Primary:</u> HbA1c<br><u>Secondary:</u> FPG,<br>serum N-(carboxymethyl)<br>lysine, periodontal<br>parameters<br><br>after 6 months<br><u>HbA1c (%)</u><br>Benefit for IG 7.75± 0.48 vs.8.5±0.73<br>(p<0.01)<br><u>FPG(mg/dl)</u><br>Benefit for IG |



| Study name<br>registration<br>number<br>Design | Setting<br>Place,<br>setting and<br>time | Population<br>Inclusion / Exclusion criteria                                                                                                                                                                                                                                                                                                                                         | Population<br>Characteristics                                                                        | Intervention vs. Control<br>Description with duration                                                                                                                                                                                                               | Outcomes<br>Primary and secondary                                                                             | Results<br>Longest follow-up period with<br>intervention effects (IG vs. CG) with<br>SD, 95%-CI or p value                                                                                                                               |
|------------------------------------------------|------------------------------------------|--------------------------------------------------------------------------------------------------------------------------------------------------------------------------------------------------------------------------------------------------------------------------------------------------------------------------------------------------------------------------------------|------------------------------------------------------------------------------------------------------|---------------------------------------------------------------------------------------------------------------------------------------------------------------------------------------------------------------------------------------------------------------------|---------------------------------------------------------------------------------------------------------------|------------------------------------------------------------------------------------------------------------------------------------------------------------------------------------------------------------------------------------------|
|                                                |                                          | antibiotics, non-steroidal or anti-inflammatory drugs within the last 3 months, periodontal therapy ≤ 1 year, retinopathy grade 3/4, pregnancy, no contraceptive drugs                                                                                                                                                                                                               | (yrs): 8.1 ± 3.9<br>hypertension: 4.5%<br>neuropathy: 1.5%<br>retinopathy: 0.5%<br>nephropathy: 0%   |                                                                                                                                                                                                                                                                     |                                                                                                               |                                                                                                                                                                                                                                          |
| <b>Ghoneim 2013</b><br><br>RCT                 | Egypt,<br><br>03/2010-<br>03/2012        | DM, duration ≥ 15 yrs, bilateral diabetic macular edema (≥ 6 months)<br><br>no prior treatment with intravitreal corticosteroids, peribulbar steroid injection within ≤ 6 months, pars plana vitrectomy, history of glaucoma or steroid induced IOP elevation, ischemic maculopathy, foveal tracted, IOP≥ 23 mmHg                                                                    | n=19 (38 eyes)<br>89.5 % female<br>age (yrs): 52.3±11.4                                              | <u>IG (n=19):</u><br>one eye with 8 mg triamcinolone acetonide vs.<br><u>CG (n=19):</u><br>other eye with 4 mg of triamcinolone acetonide<br><br><u>Duration:</u> 6 months                                                                                          | <u>Primary:</u> Visual acuity<br><u>Others:</u> Intraocular pressure (IOP), IOP lowering drugs, complications | after 6 months:<br><u>Complications:</u><br>• no eyes with retinal detachment, vitreous haemorrhage, intraocular reaction or endophthalmitis.<br>• one eye in IG developed posterior subcapsular cataract.                               |
| <b>Nteleki 2015</b><br><br>RCT                 | South Africa,<br>urban                   | DM2 with neuropathic or mixed (venous and arterial) ulcers; lower extremity ulcer; stable or worsening ulcer that has been present for ≥ 4 weeks<br><br>no acute cellulitis, osteomyelitis, or gangrene, renal, hepatic, hematologic, neurologic, or immune disease not related to diabetes; presence of malignant disease not in remission for > 5 years; use of oral or parenteral | n=7 with 14 lower extremity ulcers<br>85 % male<br>age (yrs): 62<br>duration of diabetes (yrs): 16.7 | standard podiatric management <u>and</u><br><u>IG1 (n=2):</u><br>phototherapy to the regional lymphatic nodes and ulcer(s)<br>vs.<br><u>IG2 (n=3):</u><br>phototherapy on the ulcer<br>vs.<br><u>CG (n=2):</u><br>placebo phototherapy<br><u>Duration:</u> 12 weeks | healing rate (area and perimeter of the ulcer)                                                                | after 3 months:<br><u>Healing:</u><br>• The rate of healing increased in all three groups,<br>• 67% of ulcers received some form of phototherapeutic intervention, 40% of those ulcers resolved completely over 8 weeks<br>no <u>AEs</u> |

| Study name<br>registration<br>number<br>Design            | Setting<br>Place,<br>setting and<br>time                 | Population<br>Inclusion / Exclusion criteria                                                                                                                       | Characteristics                                                                                                                  | Intervention vs. Control<br>Description with duration                                                                                                                                                                                                                                                                                                                     | Outcomes<br>Primary and secondary                                                                                                           | Results<br>Longest follow-up period with<br>intervention effects (IG vs. CG) with<br>SD, 95%-CI or p value                                                                                                                                                                                                                                                                            |
|-----------------------------------------------------------|----------------------------------------------------------|--------------------------------------------------------------------------------------------------------------------------------------------------------------------|----------------------------------------------------------------------------------------------------------------------------------|---------------------------------------------------------------------------------------------------------------------------------------------------------------------------------------------------------------------------------------------------------------------------------------------------------------------------------------------------------------------------|---------------------------------------------------------------------------------------------------------------------------------------------|---------------------------------------------------------------------------------------------------------------------------------------------------------------------------------------------------------------------------------------------------------------------------------------------------------------------------------------------------------------------------------------|
|                                                           |                                                          | corticosteroids,<br>immunosuppressive, or<br>cytotoxic agents; known<br>infection with human<br>immunodeficiency virus or<br>presence of AIDS; other leg<br>ulcers |                                                                                                                                  |                                                                                                                                                                                                                                                                                                                                                                           |                                                                                                                                             |                                                                                                                                                                                                                                                                                                                                                                                       |
| <b>Saeed 2013</b><br><br>RCT                              | Egypt,<br>urban<br><br>11/2010-<br>07/2012               | DM, intractable diffuse<br>diabetic macular edema<br>without vitreomacular<br>traction.<br>central foveal thickness $\geq 300$<br>$\mu\text{m}$                    | n= 34 (34 eyes)<br>50% females<br>age (yrs): $55.5 \pm 8.9$<br>duration of diabetes<br>(yrs): $24 \pm 5.4$                       | <u>IG (n=15):</u><br>vitrectomy with removal<br>of the posterior hyaloid,<br>at the end of the<br>procedure injection of<br>intravitreal triamcinolone<br>acetonide (IVTA, 0.1 mL,<br>40 mg/mL) +bevacizumab<br>(1.25 mg) +macular grid<br>laser photocoagulation<br>vs.<br><u>CG (n=15):</u><br>same intravitreal<br>injection combination<br><u>Duration:</u> 12 months | <u>primary:</u><br>BCVA, central foveal<br>thickness                                                                                        | Changes over 12 months<br><u>Complications:</u><br>• Changes in BCVA and central foveal<br>thickness at 3, 6, and 12 ( $P < 0.01$ ),<br>better mean BCVA in IG at 12 months.<br>• Better mean central foveal thickness in<br>IG at 12 months.<br><u>Major adverse events:</u><br>development of cataracts (3/15 vs.<br>6/15) and elevation of intraocular<br>pressure (7/15 vs. 2/15) |
| <b>Tsobgny-<br/>Tsague 2018</b><br>NCT02745015<br><br>RCT | Cameroon,<br>urban,<br>tertiary<br>care,<br><br>12/2014- | DM2, >11teeth, severe<br>chronic periodontitis<br>according to the 2012<br>CDC-AAP classification,<br><br>no periodontal treatment,                                | n=34<br>56% female<br>age (yrs): $51.4 \pm 8.8$<br>HbA1c (%): $9.3 \pm 1.3$<br>BMI ( $\text{kg}/\text{m}^2$ ): $28.3 \pm$<br>5.4 | <u>IG (n=17):</u><br>immediate ultrasonic<br>scaling, scaling and root<br>planning +subgingival<br>10% povidone iodine<br>irrigation                                                                                                                                                                                                                                      | <u>Primary:</u> change in HbA1c<br><u>Secondary:</u> Plaque index,<br>gingival bleeding index,<br>pocket depth, clinical<br>attachment loss | Change over 3 months:<br><u>HbA1c (%):</u><br>Benefit with IG: $6.7 \pm 2.0$ % vs. $8.1 \pm$<br>$2.6$ %, MD: 2.2 ( $p=0.029$ )<br><u>adverse events:</u><br>1 /15 patient reported tongue                                                                                                                                                                                             |

1  
2  
3  
4  
5  
6  
7  
8  
9  
10  
11  
12  
13  
14  
15  
16  
17  
18  
19  
20  
21  
22  
23  
24  
25  
26  
27  
28  
29  
30  
31  
32  
33  
34  
35  
36  
37  
38  
39  
40  
41  
42  
43  
44  
45  
46

| Study name                        | Setting                             | Population                                                                                                                                                                                                                                                                                          | Intervention vs. Control                                                                                                                | Outcomes                                                                                                                                                                                                                                                                  | Results                                                                                                                                                                                                                               |
|-----------------------------------|-------------------------------------|-----------------------------------------------------------------------------------------------------------------------------------------------------------------------------------------------------------------------------------------------------------------------------------------------------|-----------------------------------------------------------------------------------------------------------------------------------------|---------------------------------------------------------------------------------------------------------------------------------------------------------------------------------------------------------------------------------------------------------------------------|---------------------------------------------------------------------------------------------------------------------------------------------------------------------------------------------------------------------------------------|
| registration number               | Place, setting and time             | Inclusion / Exclusion criteria                                                                                                                                                                                                                                                                      | Description with duration                                                                                                               | Primary and secondary                                                                                                                                                                                                                                                     | Longest follow-up period with intervention effects (IG vs. CG) with SD, 95%-CI or p value                                                                                                                                             |
|                                   | 05/2015                             | alteration of DM treatment 6 mths prior to the study, onset of systemic diseases or an acute condition, use of immunosuppressive medications or others drugs or presence of conditions able to alter periodontitis clinical features                                                                | duration of diabetes (months): 55.5 ± 42.6 complications: neuropathy (%): 40 nephropathy (%): 7 retinopathy (%): 7 diabetic foot (%): 3 | vs. <u>CG(n=17):</u> periodontal treatment 3 months later <u>Duration: 3 months</u>                                                                                                                                                                                       | irritation following chlorhexidine moth rinse in IG                                                                                                                                                                                   |
| <b>Yakoot 2019</b><br>NCT01531517 | Egypt, urban<br><br>07/2011-07/2013 | Adult DM2 or DM1 patients, limb-threatening diabetic foot ulcerations<br><br>no life-threatening extensive gangrenous lesions that needed immediate amputations; bad general condition; shock or unstable vital signs; critically ill with severe organ/system dysfunctions or advanced malignancy. | n=119<br>gender:44.5% female<br>age (yrs): 54.7 ±8.4<br>type of diabetes:<br>• DM1: 22.9%<br>• DM2: 86.2%                               | conservative debridement of necrotic tissue and irrigation with warm normal saline and <u>IG (n=61):</u> local application of ointment composed of royal jelly and panthenol<br><br>vs. <u>CG (n=58):</u> local application of Panthenol<br><br><u>duration: 12months</u> | <u>primary:</u> complete healing<br><u>secondary:</u> reduction of infection in the ulcer site, al reaction that may be due to study drug<br><br>after 12 months rate of complete healing (%): Benefit for IG: 32.4% vs. 12%; p=0.034 |

ADA: American Diabetes Association; BCVA: Best-corrected visual acuity; BMI: Body mass index; CG: Control group; CI: Confidence interval; CHC: Community health centre; DBP: Diastolic blood pressure; DM: diabetes mellitus; DM1: Type 1 diabetes; DM2: type 2 diabetes; FPG: fasting plasma glucose; HbA1c: haemoglobin A1c; IG: intervention group; IQR: interquartile range; n: number of participants; NCD: Non-communicable disease; NPH: neutral protamine Hagedorn; MD: mean difference; MDa: adjusted mean difference; NCD: Non-communicable disease ;RCT: randomized controlled trial; RR: Relative risk; RRa: adjusted relative risk; SAE: Serious adverse events; SBP: Systolic blood pressure; SCI: Diabetes Self-Care Inventory; SD: Standard-deviation; SMBG: self-monitoring of blood glucose; wks: weeks; yrs: years

**Table 4: Characteristics and results of studies on patients with DM2**

## RCTs on pregnant DM patients

| Study name<br>registration<br>number<br>Design  | Setting<br>Place,<br>setting and<br>time    | Population<br>Inclusion / Exclusion criteria<br>Characteristics                                                                                                                                                                                                                                                                                                                                                                                                                                                 | Intervention vs.<br>Control<br>Description with<br>duration                                                                                                                                        | Outcomes<br>Primary and secondary                                                                                                                                                                                                                                                       | Results<br>Longest follow-up period<br>with intervention effects<br>(IG vs. CG) with SD, 95%-<br>CI or p value     | Study name<br>registration number<br>Design                                                                                                                                                                                                        |
|-------------------------------------------------|---------------------------------------------|-----------------------------------------------------------------------------------------------------------------------------------------------------------------------------------------------------------------------------------------------------------------------------------------------------------------------------------------------------------------------------------------------------------------------------------------------------------------------------------------------------------------|----------------------------------------------------------------------------------------------------------------------------------------------------------------------------------------------------|-----------------------------------------------------------------------------------------------------------------------------------------------------------------------------------------------------------------------------------------------------------------------------------------|--------------------------------------------------------------------------------------------------------------------|----------------------------------------------------------------------------------------------------------------------------------------------------------------------------------------------------------------------------------------------------|
| <b>Strategies to increase physical activity</b> |                                             |                                                                                                                                                                                                                                                                                                                                                                                                                                                                                                                 |                                                                                                                                                                                                    |                                                                                                                                                                                                                                                                                         |                                                                                                                    |                                                                                                                                                                                                                                                    |
| <b>Embaby<br/>2016</b><br><br>RCT               | Egypt,<br>urban,<br><br>07/2014-<br>02/2015 | at increased risk for GDM due<br>to obesity (BMI $\geq$ 30 kg/m <sup>2</sup> ),<br>age: $>$ 25 yrs,<br>20-24th gestational wks,<br>multigravida, physically active<br>with $\geq$ 1 of the following 3<br>characteristics: history of<br>macrosomia, abnormal<br>glucose tolerance during<br>previous pregnancy or first<br>grade relative with DM2<br><br>no hypertension, GDM,<br>medications that affects<br>insulin secretion, serious<br>pulmonary disease, cardiac,<br>renal impairment and<br>malignancy | n=40<br>100% female<br>age (yrs): 29.2 $\pm$ 3.8<br>BMI (kg/m <sup>2</sup> ):28.7 $\pm$ 1.3<br>fasting glucose<br>(mmol/l): 6.5 $\pm$ 0.9<br>fasting insulin (IU/l):<br>15.78 $\pm$ 1.58           | <u>IG:</u><br>aerobic exercise program<br>(walking on treadmill)<br>three times weekly until<br>the end of 37 wks of<br>gestation + diet control.<br>vs.<br><u>CG:</u><br>diet control with usual<br>care given by<br>obstetricians and<br>midwives.<br><u>Duration:</u> appr. 4 months | Fasting plasma glucose,<br>Insulin level                                                                           | Change to 37 <sup>th</sup> week of gestation:<br><u>FPG (mmol/l)</u><br>Benefit for IG: 4.26 $\pm$ 0.67 vs. 5.07 $\pm$ 0.54<br>(p=0.0001)<br><u>Fasting insulin (IU/l):</u><br>Benefit for IG: 10.59 $\pm$ 1.10 vs.<br>12.43 $\pm$ 1.44 (p=0.0001) |
| <b>Other non-pharmacological therapies</b>      |                                             |                                                                                                                                                                                                                                                                                                                                                                                                                                                                                                                 |                                                                                                                                                                                                    |                                                                                                                                                                                                                                                                                         |                                                                                                                    |                                                                                                                                                                                                                                                    |
| <b>EI-Shamy<br/>2018</b><br><br>RCT             | Egypt,<br>urban<br><br>12/2016-<br>05/2017  | GDM, age: 20-30 yrs,<br>gestational age: 24-26 wks,<br>BMI $\leq$ 30 kg/m <sup>2</sup> , singleton live<br>fetus<br><br>no high-risk pregnancy, bad<br>obstetric situations or<br>diseases, smoking, oral<br>sedatives                                                                                                                                                                                                                                                                                          | n=30<br>100% female<br>age (yrs): 24.2 $\pm$ 2.8<br>75 g OGTT (mg/dl):<br>• fasting glucose:<br>129.05 $\pm$ 0.6<br>• 2h postprandial:<br>146 $\pm$ 1.65<br>BMI (kg/m <sup>2</sup> ): 27 $\pm$ 1.5 | <u>IG (n=15):</u><br>acupressure + standard<br>antenatal care<br>vs.<br><u>CG (n=15):</u><br>standard antenatal care<br>only<br><u>Duration:</u> 12 weeks                                                                                                                               | Primary:<br>glycemic control,<br>requirement for insulin,<br>insulin resistance<br>Secondary:<br>neonatal outcomes | Change over 3 months:<br>75 g OGTT (mg/dl):<br>Fasting: 116.1 $\pm$ 0.1 vs. 118.2 $\pm$ 0.7<br>2h postprandial:<br>125.3 $\pm$ 1.2 vs. 127.3 $\pm$ 0.9<br>Complication (%):<br>5-min Apgar-Score < 7: 6.7 vs. 6.7 %                                |

|                                   |                                                                              |                                                                                                                                                                                                                                                                                                                                                                         |                                                                                                                                                                                                 |                                                                                                                                                                                                                                                                                                                                                                                                                                                                                                                                                                                                                                                                                     |                                                                                                                                                                                                                                                                                                                                                                                                              |                                                                                                                                                                                                                                                                                                                                                                                                                                                                                                                                                                                                                                                                                                                                     |
|-----------------------------------|------------------------------------------------------------------------------|-------------------------------------------------------------------------------------------------------------------------------------------------------------------------------------------------------------------------------------------------------------------------------------------------------------------------------------------------------------------------|-------------------------------------------------------------------------------------------------------------------------------------------------------------------------------------------------|-------------------------------------------------------------------------------------------------------------------------------------------------------------------------------------------------------------------------------------------------------------------------------------------------------------------------------------------------------------------------------------------------------------------------------------------------------------------------------------------------------------------------------------------------------------------------------------------------------------------------------------------------------------------------------------|--------------------------------------------------------------------------------------------------------------------------------------------------------------------------------------------------------------------------------------------------------------------------------------------------------------------------------------------------------------------------------------------------------------|-------------------------------------------------------------------------------------------------------------------------------------------------------------------------------------------------------------------------------------------------------------------------------------------------------------------------------------------------------------------------------------------------------------------------------------------------------------------------------------------------------------------------------------------------------------------------------------------------------------------------------------------------------------------------------------------------------------------------------------|
| <b>Utz 2018</b><br>NCT02979756    | Marocco,<br>urban /<br>rural,<br>primary<br>care,<br><br>11/2016-<br>02/2018 | Health centres with ≥ 30<br>monthly antenatal care<br>consultations and all<br>pregnant women with newly<br>diagnosed GDM<br><br>no DM2, DM1                                                                                                                                                                                                                            | 20 health centres<br>n= 215<br>age (yrs):27.6±6.6<br>urban (%): 38.5<br>rural (%): 61.5                                                                                                         | 20 clinics were<br>randomized→ 10 in each<br>group<br><u>IG (n=120):</u><br>first screening for<br>GDM→positive tested<br>women received<br>counselling on nutrition<br>and exercise<br><u>vs.</u><br><u>CG (n=95):</u><br>routine practice                                                                                                                                                                                                                                                                                                                                                                                                                                         | Primary: birthweight<br>Secondary: maternal<br>weight gain,<br>glucose control,<br>pregnancy complications.                                                                                                                                                                                                                                                                                                  | Follow-up visits:<br>7.5±4.9 vs. 3.8±3.3 (p=0.001)<br><br>FBG within the norm: better with IG<br><1/3 of all values: 7.6 vs. 32.6 %<br>1/3-2/3 of all values: 17.8 vs. 32.6 %<br>>2/3 of all values: 74.6 vs. 34.8 %<br><br>Macrosomia (birthweight>4000 g): 3.5<br>vs. 18.4 % (p<0.001)                                                                                                                                                                                                                                                                                                                                                                                                                                            |
| <b>Pharmacological strategies</b> |                                                                              |                                                                                                                                                                                                                                                                                                                                                                         |                                                                                                                                                                                                 |                                                                                                                                                                                                                                                                                                                                                                                                                                                                                                                                                                                                                                                                                     |                                                                                                                                                                                                                                                                                                                                                                                                              |                                                                                                                                                                                                                                                                                                                                                                                                                                                                                                                                                                                                                                                                                                                                     |
| <b>Ashoush 2016</b><br>RCT        | Egypt,<br>urban,<br>tertiary care<br><br>01/2014-<br>11/2014                 | GDM, mothers with 26–32-<br>week GDM (oral 2-h 75 G<br>glucose tolerance test)<br>singleton pregnancies, failure<br>of satisfactory glycemic<br>control despite adequate diet<br>and exercise for ≥ 1 wk<br><br>no fetal anomalies on<br>ultrasonography, other<br>pregnancy complications,<br>known intolerance to<br>metformin or risk factors for<br>lactic acidosis | n=95<br>100% female<br>age (yrs): 31.8±3<br>HbA1c (%): 5.75 ±<br>0.55<br>75g OGTT (mg/dl)<br>• fasting: 106.05±4.6<br>• 1h:310.25±11.6<br>• 2h:176.65±9.4<br>BMI (kg/m <sup>2</sup> ): 31.2±1.4 | <u>IG (n = 47):</u><br>metformin (initial total<br>dose 1000 mg/d with<br>meals, increase by 500 or<br>850 mg every 1 or 2 wks<br>toward target or up to a<br>maximum dose of<br>2500 mg/d until delivery,<br>addition of insulin if<br>needed)<br><u>vs.</u><br><u>CG (n = 48):</u><br><u>regular insulin + neutral</u><br><u>protamine Hagedorn (3:7)</u><br><u>(starting dose 0.7 units</u><br><u>/kg*d, adjusted to</u><br><u>achieve adequate</u><br><u>glycemic control at</u><br><u>increments of 1</u><br><u>unit/10 mg glucose</u><br><u>higher than the desired</u><br><u>cut-off, short action</u><br><u>insulin whenever needed)</u><br><u>Duration: until delivery</u> | Primary: successful<br>maternal glycemic control<br>Secondary: maternal BMI,<br>glycemic control<br>parameters, maternal<br>weight gained during<br>pregnancy, side effects to<br>metformin, mode of<br>delivery, gestational age<br>at delivery, neonatal<br>birthweight, macrosomia,<br>neonatal hypoglycemia,<br>neonatal death,<br>congenital anomalies,<br>admission to neonatal<br>intensive care unit | Until delivery:<br>fasting glucose during treatment<br>(mg/dl): better with IG:<br>• during the last wk: 78±3.1 vs. 79.9±3.7<br>(p=0.008)<br>• during the last 2 wks: 78.9±3.5 vs.<br>80.8±4.7 (p=0.029)<br>maternal hypoglycaemia (%):<br>no difference: 6.25 vs. 12.5 (p=0.254)<br>neonatal hypoglycaemia (%):<br>12.8 vs. 14.6 (p=0.791)<br>Maternal weight gain (Kg):<br>4.4 ± 0.6 vs. 5.1 ± 0.8 (p=0.001)<br>neonatal congenital anomalies (%):<br>2.1 vs. 2.1 p= 0.747<br>headache (%):<br>27.3 (metformin+insulin) vs. 5.6<br>(metformin monotherapy) vs. 0%<br>(insulin monotherapy)<br>neonatal ICU admission (%):<br>8.5 vs. 10.4 (p= 0.514)<br>Costs (Egyptian pounds): 89.66±0.96<br>vs. 174.9±11.1 (for monotherapies) |

|                                                                                                                                                                      |                                                         |                                            |                                                                                                                                                                                                                                                                                                                                                                                                     |                                                                                                                                                                                                                        |                                                                                                                                                                                                                                                                                                                                                                                                                     |                                                                                                                                                                                                                                                                                                                                                                                                                                                                                                 |                                                                                                                                                                                                                                                                                                                                                                                                                                                                                                                                                                                                                                                                                        |
|----------------------------------------------------------------------------------------------------------------------------------------------------------------------|---------------------------------------------------------|--------------------------------------------|-----------------------------------------------------------------------------------------------------------------------------------------------------------------------------------------------------------------------------------------------------------------------------------------------------------------------------------------------------------------------------------------------------|------------------------------------------------------------------------------------------------------------------------------------------------------------------------------------------------------------------------|---------------------------------------------------------------------------------------------------------------------------------------------------------------------------------------------------------------------------------------------------------------------------------------------------------------------------------------------------------------------------------------------------------------------|-------------------------------------------------------------------------------------------------------------------------------------------------------------------------------------------------------------------------------------------------------------------------------------------------------------------------------------------------------------------------------------------------------------------------------------------------------------------------------------------------|----------------------------------------------------------------------------------------------------------------------------------------------------------------------------------------------------------------------------------------------------------------------------------------------------------------------------------------------------------------------------------------------------------------------------------------------------------------------------------------------------------------------------------------------------------------------------------------------------------------------------------------------------------------------------------------|
| 1<br>2<br>3<br>4<br>5<br>6<br>7<br>8<br>9<br>10<br>11<br>12<br>13<br>14<br>15<br>16<br>17<br>18                                                                      | <b>Beyuo 2015</b><br>ACTRN126140<br>00942651<br><br>RCT | Ghana,<br>urban<br><br>01/2013-<br>12/2013 | pregnant women with DM2<br>or GDM (plasma glucose<br>≥7 mmol/l after an overnight<br>fast or plasma glucose<br>concentration ≥11.1 mmol/l 2<br>hours after a 75 g glucose<br>drink), 20-30 wks gestation,<br>age: 18-45yrs, eligible for<br>insulin therapy<br><br>no T1DM, DM2 who have<br>previously failed to achieve<br>glycemic control on<br>metformin monotherapy,<br>allergies to metformin | n= 104<br>100% female<br>age (yrs): 33.3±4.6<br>fasting glucose<br>(mmol/l): 8<br>2HPG (mmol/l): 10.5<br>BMI (kg/m <sup>2</sup> ): 3.1±6.6<br>type of diabetes:<br>GDM (%): 65.9<br>DM2 (%): 34.0                      | <u>IG (n=52):</u><br>Metformin (starting with<br>500 mg / d, gradually<br>increase over 2 wks to a<br>maximum dose of 2500<br>mg/d, insulin was added<br>if necessary)<br>vs.<br><u>CG (n=52):</u><br>insulin treatment (daily<br>dose 0.3 IU/kg, titrated to<br>achieve the glycemic<br>targets, if necessary,<br>admission to the ward<br>and therapy with soluble<br>insulin)<br><u>Duration: until delivery</u> | Primary: 2-hour post<br>prandial blood glucose<br>(2HPG)<br>Secondary: fasting<br>glucose, 1HPG, maternal<br>weight gain, pregnancy<br>outcome and feto-<br>neonatal outcomes.                                                                                                                                                                                                                                                                                                                  | Change from enrolment to delivery:<br>glycemic control (mmol/l):<br>fasting glucose:<br>no difference: 6.42±0.98 vs. 6.62±1.57<br>(p=0.928)<br>1HPG:<br>no difference: 8.95±1.27 vs. 9.62±1.44<br>(p=0.078)<br>2HPG:<br>benefit for IG: 7.84±1.43 vs. 9.05±1.89<br>(p=0.004)                                                                                                                                                                                                                                                                                                                                                                                                           |
| 19<br>20<br>21<br>22<br>23<br>24<br>25<br>26<br>27<br>28<br>29<br>30<br>31<br>32<br>33<br>34<br>35<br>36<br>37<br>38<br>39<br>40<br>41<br>42<br>43<br>44<br>45<br>46 | <b>Ibrahim 2014</b><br>NCT01915550<br><br>RCT           | Egypt,<br>urban<br><br>08/2011-<br>04/2012 | GDM or pre-existing DM,<br>gestational age 20-34 wks<br>with insulin resistance<br>No DM1, secondary diabetes<br>or liver or renal impairment                                                                                                                                                                                                                                                       | n=90<br>100% female<br>age (yrs): 29.8 ± 5.4<br>BMI (kg/m <sup>2</sup> ):31.83 ±<br>3.23<br>Gestational age: 28.7<br>± 3.7 wks<br>GDM: 43.3 %<br>Pre-existing DM:<br>56.7 % with median<br>duration of 4 (1-15)<br>yrs | <u>IG (n=46):</u><br>Metformin (1500 mg,<br>raised to 2000 mg)<br>without increasing insulin<br>dose<br>Patients switched to CG if<br>treatment was not<br>successful to control<br>blood glucose<br>concentrations<br><u>CG (n=44):</u><br>insulin dose was<br>increased according to<br>the standard protocol                                                                                                     | Primary:<br>maternal glycemic control<br>(fasting glucose<br>≤ 95 mg/dl and 2-HPG<br>≤ 120 mg/dl)<br>Secondary:<br>maternal bouts of<br>hypoglycemia, need for<br>another hospital<br>admission for<br>uncontrolled diabetes<br>during pregnancy,<br>gestational age at<br>delivery, mode of<br>delivery, birth weight,<br>birth trauma, congenital<br>anomalies, Apgar score,<br>neonatal hypoglycemia,<br>need for neonatal<br>intensive care unit<br>admission, adverse<br>neonatal outcomes | glycemic control:<br><ul style="list-style-type: none"> <li>• better for CG: 76.1 vs. 100 %<br/>reached glycemic control (p=0.001)</li> <li>• 13 vs. 18.2 % had readmission for<br/>poor glycemic control</li> <li>• 6.5 vs. 22.7 % had bouts of<br/>maternal hypoglycaemia</li> </ul> Complications:<br><ul style="list-style-type: none"> <li>• 23.3 vs. 30.8 % had fetal<br/>macrosomia</li> <li>• 1 new-born in each group had<br/>congenital malformations</li> <li>• 7 vs. 38.5 % had neonatal<br/>hypoglycaemia</li> <li>• 18.6 vs. 41 % had NICU admission</li> <li>• 0 vs. 5.1 % had stillbirths</li> <li>• 11.6 vs. 25.6 % with respiratory<br/>distress syndrome</li> </ul> |

1  
2  
3  
4  
5  
6  
7  
8  
9  
10  
11  
12  
13  
14  
15  
16  
17  
18  
19  
20  
21  
22  
23  
24  
25  
26  
27  
28  
29  
30  
31  
32  
33  
34  
35  
36  
37  
38  
39  
40  
41  
42  
43  
44  
45  
46

BMI: Body mass index; CG: Control group; CI: Confidence interval; DM: diabetes mellitus; DM2: type 2 diabetes; FPG: fasting plasma glucose; GDM: gestational diabetes; HbA1c: haemoglobin A1c; 1 / 2HPG: 1 / 2-hour post prandial blood glucose; IG: intervention group; n: number of participants; MD: mean difference; MDa: adjusted mean difference; OGTT: Oral glucose tolerance test; RCT: randomized controlled trial; RR: Relative risk; RRa: adjusted relative risk; SD: Standard-deviation; wks: weeks; yrs: years

**Table 5: Characteristics and results of studies on pregnant women with DM**

For peer review only

1  
2  
3  
4  
5  
6  
7  
8  
9  
10  
11  
12  
13  
14  
15  
16  
17  
18  
19  
20  
21  
22  
23  
24  
25  
26  
27  
28  
29  
30  
31  
32  
33  
34  
35  
36  
37  
38  
39  
40  
41  
42  
43  
44  
45  
46

For peer review only



1  
2  
3  
4  
5  
6  
7  
8  
9  
10  
11  
12  
13  
14  
15  
16  
17  
18  
19  
20  
21  
22  
23  
24  
25  
26  
27  
28  
29  
30  
31  
32  
33  
34  
35  
36  
37  
38  
39  
40  
41  
42  
43  
44  
45  
46

**R**

For peer review only

## Risk of bias

| Study            | Sequence generation | Allocation concealment | Blinding of participants/personnel | Blinding of outcome assessors | Incomplete outcome data | Selective outcome reporting | Other risk of bias |
|------------------|---------------------|------------------------|------------------------------------|-------------------------------|-------------------------|-----------------------------|--------------------|
| Abaza 2017       |                     |                        |                                    |                               |                         |                             |                    |
| Abdulrhman 2013  |                     |                        |                                    |                               |                         |                             |                    |
| Adibe 2013       |                     |                        |                                    |                               |                         |                             |                    |
| Adjei 2015       |                     |                        |                                    |                               |                         |                             |                    |
| Ali 2019         |                     |                        |                                    |                               |                         |                             |                    |
| Amendezo 2017    |                     |                        |                                    |                               |                         |                             |                    |
| Anderson 2001    |                     |                        |                                    |                               |                         |                             |                    |
| Anyanwu 2016     |                     |                        |                                    |                               |                         |                             |                    |
| Ashoush 2016     |                     |                        |                                    |                               |                         |                             |                    |
| Asuako 2017      |                     |                        |                                    |                               |                         |                             |                    |
| Beyuo 2015       |                     |                        |                                    |                               |                         |                             |                    |
| Chraibi 2017     |                     |                        |                                    |                               |                         |                             |                    |
| Debussche 2018   |                     |                        |                                    |                               |                         |                             |                    |
| Distiller 2014   |                     |                        |                                    |                               |                         |                             |                    |
| Elbarbary 2016   |                     |                        |                                    |                               |                         |                             |                    |
| Elbarbary 2018   |                     |                        |                                    |                               |                         |                             |                    |
| Elbarbary 2020   |                     |                        |                                    |                               |                         |                             |                    |
| El Gayar 2019    |                     |                        |                                    |                               |                         |                             |                    |
| El-Haggag 2015   |                     |                        |                                    |                               |                         |                             |                    |
| El-Makaky 2020   |                     |                        |                                    |                               |                         |                             |                    |
| El-Shamy 2018    |                     |                        |                                    |                               |                         |                             |                    |
| El-Sharkawy 2016 |                     |                        |                                    |                               |                         |                             |                    |
| El-Sheikh 2019   |                     |                        |                                    |                               |                         |                             |                    |
| Embaby 2016      |                     |                        |                                    |                               |                         |                             |                    |
| Essien 2017      |                     |                        |                                    |                               |                         |                             |                    |
| Fairall 2016     |                     |                        |                                    |                               |                         |                             |                    |
| Fayehun 2018     |                     |                        |                                    |                               |                         |                             |                    |
| Ghoneim 2013     |                     |                        |                                    |                               |                         |                             |                    |
| Hailu 2018       |                     |                        |                                    |                               |                         |                             |                    |
| Ibrahim 2014     |                     |                        |                                    |                               |                         |                             |                    |
| Krawinkel 2018   |                     |                        |                                    |                               |                         |                             |                    |

| Study               | Sequence generation | Allocation concealment | Blinding of participants/personnel | Blinding of outcome assessors | Incomplete outcome data | Selective outcome reporting | Other risk of bias |
|---------------------|---------------------|------------------------|------------------------------------|-------------------------------|-------------------------|-----------------------------|--------------------|
| Labhardt 2011       | 😊                   | 😊                      | 😞                                  | 😊                             | 😊                       | 😊                           | 😊                  |
| Maharaj 2016        | 😊                   | 😊                      | 😞                                  | 😊                             | 😊                       | 😊                           | 😞                  |
| Malek 2015          | 😊                   | 😊                      | 😞                                  | 😊                             | 😊                       | 😊                           | 😊                  |
| Malipa 2013         | 😊                   | 😊                      | 😞                                  | 😞                             | 😊                       | 😊                           | 😞                  |
| Mash 2014           | 😊                   | 😊                      | 😞                                  | 😞                             | 😞                       | 😊                           | 😊                  |
| Matter 2020         | 😊                   | 😊                      | 😊                                  | 😊                             | 😊                       | 😞                           | 😊                  |
| Mohamad 2009        | 😊                   | 😊                      | 😞                                  | 😊                             | 😊                       | 😊                           | 😞                  |
| Moustafa 2019       | 😊                   | 😊                      | 😞                                  | 😊                             | 😞                       | 😊                           | 😞                  |
| Muchiri 2015        | 😊                   | 😊                      | 😞                                  | 😊                             | 😊                       | 😊                           | 😞                  |
| Nteleki 2015        | 😞                   | 😊                      | 😞                                  | 😊                             | 😊                       | 😊                           | 😞                  |
| Owolabi 2019        | 😊                   | 😊                      | 😞                                  | 😊                             | 😊                       | 😞                           | 😞                  |
| Rashad 2017         | 😊                   | 😊                      | 😊                                  | 😊                             | 😞                       | 😊                           | 😞                  |
| Ragheb 2020         | 😊                   | 😊                      | 😞                                  | 😞                             | 😞                       | 😊                           | 😊                  |
| RezkAllah 2019      | 😊                   | 😊                      | 😞                                  | 😊                             | 😊                       | 😊                           | 😊                  |
| Saeed 2013          | 😊                   | 😊                      | 😞                                  | 😞                             | 😞                       | 😊                           | 😞                  |
| Salem 2010          | 😊                   | 😊                      | 😞                                  | 😞                             | 😊                       | 😊                           | 😞                  |
| Sodipo 2017         | 😊                   | 😊                      | 😞                                  | 😊                             | 😞                       | 😊                           | 😊                  |
| Somanah 2012        | 😊                   | 😊                      | 😞                                  | 😊                             | 😞                       | 😞                           | 😞                  |
| Steyn 2013          | 😊                   | 😊                      | 😞                                  | 😊                             | 😞                       | 😊                           | 😊                  |
| Takenga 2014        | 😊                   | 😊                      | 😞                                  | 😊                             | 😊                       | 😊                           | 😞                  |
| Tawfik 2016         | 😊                   | 😊                      | 😊                                  | 😊                             | 😞                       | 😊                           | 😊                  |
| Thuita 2020         | 😊                   | 😊                      | 😞                                  | 😊                             | 😊                       | 😊                           | 😊                  |
| Tsobgny-Tsague 2018 | 😊                   | 😊                      | 😞                                  | 😊                             | 😞                       | 😊                           | 😊                  |
| Utz 2018            | 😊                   | 😊                      | 😞                                  | 😊                             | 😊                       | 😞                           | 😞                  |
| Van der Hoogt 2017  | 😊                   | 😊                      | 😞                                  | 😊                             | 😞                       | 😊                           | 😞                  |
| Van Rooijen 2004    | 😊                   | 😊                      | 😞                                  | 😊                             | 😊                       | 😊                           | 😞                  |
| Webb 2015           | 😊                   | 😊                      | 😊                                  | 😊                             | 😞                       | 😊                           | 😊                  |
| Yakoot 2019         | 😊                   | 😊                      | 😞                                  | 😞                             | 😊                       | 😞                           | 😞                  |
| Yan 2014            | 😊                   | 😊                      | 😞                                  | 😊                             | 😊                       | 😊                           | 😞                  |

😊: low, 😞: unclear, 😞: high risk of bias

Table 6: Judgements on risk of bias

1  
2  
3  
4  
5  
6  
7  
8  
9  
10  
11  
12  
13  
14  
15  
16  
17  
18  
19  
20  
21  
22  
23  
24  
25  
26  
27  
28  
29  
30  
31  
32  
33  
34  
35  
36  
37  
38  
39  
40  
41  
42  
43  
44  
45  
46  
47  
48  
49  
50  
51  
52  
53  
54  
55  
56  
57  
58  
59  
60

For peer review only

1  
2  
3  
4  
5  
6  
7  
8  
9  
10  
11  
12  
13  
14  
15  
16  
17  
18  
19  
20  
21  
22  
23  
24  
25  
26  
27  
28  
29  
30  
31  
32  
33  
34  
35  
36  
37  
38  
39  
40  
41  
42  
43  
44  
45  
46  
47  
48  
49  
50  
51  
52  
53  
54  
55  
56  
57  
58  
59  
60

Supplement 2

For peer review only

## Search strategies

### Medline (Ovid)

Search on 19.11.2018, 1470 references, Update from 2018 to Current on 20.08.2020: 541 references

| Nr.       | Searches                                                            |
|-----------|---------------------------------------------------------------------|
| 1.        | exp Diabetes Mellitus/                                              |
| 2.        | Diabetes.tw                                                         |
| <b>3.</b> | <b>or/1-2</b>                                                       |
| 4.        | Africa.tw                                                           |
| 5.        | Exp Africa/                                                         |
| 6.        | Algeria\$.tw or exp Algeria/                                        |
| 7.        | Angol\$.tw or exp Angola/                                           |
| 8.        | Benin\$.tw or exp Benin/                                            |
| 9.        | Botswan\$.tw or exp Botswana/                                       |
| 10.       | Burkina Faso.tw or exp Burkina Faso/                                |
| 11.       | Burund\$.tw or exp Burundi/                                         |
| 12.       | Cameroon\$.tw or exp Cameroon/                                      |
| 13.       | Cape Verde.tw or exp Cape Verde/                                    |
| 14.       | Central African Republic\$.tw or exp Central African Republic/      |
| 15.       | Chad\$.tw or exp Chad/                                              |
| 16.       | Comoros\$.tw or exp Comoros/                                        |
| 17.       | Cote d'Ivoire.tw or exp Cote d'Ivoire/                              |
| 18.       | Democratic Republic of Congo.tw or exp Democratic Republic of Congo |
| 19.       | Djibout\$.tw or exp Djibouti/                                       |
| 20.       | Egypt\$.tw or exp Egypt/                                            |
| 21.       | Equatorial Guinea\$.tw or exp Equatorial Guinea/                    |
| 22.       | Eritrea\$.tw or exp Eritrea/                                        |
| 23.       | Ethiop\$.tw or exp Ethiopia/                                        |
| 24.       | Gabon\$.tw or exp Gabon/                                            |
| 25.       | Gambia\$.tw or exp Gambia/                                          |
| 26.       | Ghana\$.tw or exp Ghana/                                            |
| 27.       | Guinea\$.tw or exp Guinea/                                          |
| 28.       | Guinea-Bissau.tw or exp Guinea-Bissau/                              |
| 29.       | Kenya\$.tw or exp Kenya/                                            |
| 30.       | Lesoth\$.tw or exp Lesotho/                                         |
| 31.       | Liberia\$.tw or exp Liberia/                                        |
| 32.       | Libya\$.tw or exp Libya/                                            |
| 33.       | Madagascar\$.tw or exp Madagascar/                                  |
| 34.       | Malawi\$.tw or exp Malawi/                                          |

| <b>Nr.</b> | <b>Searches</b>                              |
|------------|----------------------------------------------|
| 35.        | Mali.tw or exp Mali/                         |
| 36.        | Mauritania\$.tw or exp Mauritania/           |
| 37.        | Mauritius\$.tw or exp Mauritius/             |
| 38.        | Morocc\$.tw or exp Morocco/                  |
| 39.        | Mozambique\$.tw or exp Mozambique/           |
| 40.        | Namibia\$.tw or exp Namibia/                 |
| 41.        | Niger.tw or exp Niger/                       |
| 42.        | Nigeria\$.tw or exp Nigeria/                 |
| 43.        | Rwanda\$.tw or exp Rwanda/                   |
| 44.        | (Sao Tome and Principe).tw                   |
| 45.        | Senegal\$.tw or exp Senegal/                 |
| 46.        | Seychell\$.tw                                |
| 47.        | Sierra Leone.tw or exp Sierra Leone/         |
| 48.        | Somalia\$.tw or exp Somalia/                 |
| 49.        | South Africa\$.tw or exp South Africa.de     |
| 50.        | South Sudan.tw or exp South Sudan/           |
| 51.        | Sudan\$.tw or exp Sudan/                     |
| 52.        | Swaziland\$.tw or exp Swaziland/             |
| 53.        | Tanzania\$.tw or exp Tanzania/               |
| 54.        | Togo\$.tw or exp Togo/                       |
| 55.        | Tunisia\$.tw or exp Tunisia/                 |
| 56.        | Uganda\$.tw or exp Uganda/                   |
| 57.        | Zambia\$.tw or exp Zambia/                   |
| 58.        | Zimbabwe\$.tw or exp Zimbabwe/               |
| 59.        | Somaliland\$.tw or exp Somaliland/           |
| 60.        | Sahrawi Arab Democratic Republic.tw.         |
| 61.        | or/4-60                                      |
| 62.        | randomized controlled trial.pt.              |
| 63.        | controlled clinical trial.pt.                |
| 64.        | (randomized or randomised or randomly).ti,ab |
| 65.        | placebo.ti,ab.                               |
| 66.        | trial.ti,ab.                                 |
| 67.        | groups.ti,ab.                                |
| 68.        | or/62-67                                     |
| 69.        | 3 and 61 and 68                              |
| 70.        | exp animals/ not humans.sh.                  |
| 71.        | 69 not 70                                    |
| 72.        | 71 not (comment or editorial).pt.            |

**CENTRAL**

Search on 14.01.2019, 439 trials, Update from 2018 to Current on 20.08.2020: 244 trials

|    |                                                                                                                       |
|----|-----------------------------------------------------------------------------------------------------------------------|
| 1  | Africa, explode all trees                                                                                             |
| 2  | Algeria* or Angol* or Benin* or Botswan*                                                                              |
| 3  | (Burkina Faso) or Burund* or Cameroon* or (Cape Verde) or (Central African Republic)                                  |
| 4  | Chad* or Comoros* or Cote d'Ivoire or Congo*                                                                          |
| 5  | Djibout* or Egypt* or (Equatorial Guinea*) or Eritrea*                                                                |
| 6  | Ethiop* or Gabon* or Gambia* or Ghana* or Guinea* or Guinea-Bissau                                                    |
| 7  | Kenya* or Lesoth* or Liberia* or Libya* or Madagascar* or Malawi*                                                     |
| 8  | Mali* or Mauritania* or Mauritius* or Morocc* or Mozambique* or Namibia* or Niger*                                    |
| 9  | Nigeria* or Rwanda* or (Sao Tome and Principe) or Senegal* or Seychell*                                               |
| 10 | Sierra Leone or Somalia* or (South Africa) or (South Sudan*) or Sudan* or Swasiland                                   |
| 11 | Tanzania* or Togo* or Tunisia* or Uganda* or Zambia* or Zimbabwe* or Somaliland or (Sahrawi Arab Democratic Republic) |
| 12 | #1 or #2 or #3 or #4 or #5 or #6 or #7 or #8 or #9 or #10 or #11                                                      |
| 13 | MeSH descriptor Diabetes, this term only                                                                              |
| 14 | MESH descriptor Diabetes mellitus, explode all trees                                                                  |
| 15 | Diabetes near 3 gestation*                                                                                            |
| 16 | Latent autoimmune diabetes in adults                                                                                  |
| 17 | Prediabetes                                                                                                           |
| 18 | Insulin resistan*                                                                                                     |
| 20 | HBA1C                                                                                                                 |
| 21 | Diabet* near 3 (angiopath* or foot orfeet or retinopath*)                                                             |
| 22 | Diabet* near 3 (cardiomyopathy* or coma or ketoacido* or neuropath*)                                                  |
| 23 | #13 or #14 or #15 or #16 or #17 or #18 or #19 or #20 or #21                                                           |
| 32 | #12 and #23                                                                                                           |

**CINAHL**

Search on 20.08.2020: 19 results

(Africa\$ or Africa\$ or Algeria\$ or Angol\$ or Benin\$ or Botswan\$ or (Burkina Faso) or Burund\$ or Cameroon\$ or (Cape Verde) or (Central African Republic) or Chad\$ or Comoros\$ or Cote d'Ivoire or Congo\$ Djibout\$ or Egypt\$ or (Equatorial Guinea\$) or Eritrea\$



1  
2  
3 or Ethiop\$ or Gabon\$ or Gambia\$ or Ghana\$ or Guinea\$ or Guinea-Bissau or Kenya\$ or  
4 Lesoth\$ or Liberia\$ or Libya\$ or Madagascar\$ or Malawi\$ or Mali\$ or Mauritania\$ or  
5 Mauritius\$ or Morocc\$ or Mozambique\$ or Namibia\$ or Niger\$ or Nigeria\$ or Rwanda\$ or  
6 (Sao Tome and Principe) or Senegal\$ or Seychell\$ or Sierra Leone or Somalia\$ or (South  
7 Africa) or (South Sudan\$) or Sudan\$ or Swasiland or Tanzania\$ or Togo\$ or Tunisia\$ or  
8 Uganda\$ or Zambia\$ or Zimbabwe\$ or Somaliland or (Sahrawi Arab Democratic Republic))  
9  
10  
11  
12 in Abstract

13  
14 AND

15 diabetes in Abstract

16  
17 AND

18 randomized or rct or randomized in Abstract

19  
20 AND

21 In English

22  
23 AND

24 Peer-reviewed

25  
26 And

27 Humans  
28  
29  
30

### 31 **International Clinical Trials Registry Platform**

32 Search on 9.-10.10.2019, update on 25.08.2020 (registration January 2019 to 31.08.2020)

33 <http://apps.who.int/trialsearch/AdvSearch.aspx>

- 34  
35  
36  
37  
38  
39  
40  
41  
42  
43  
44  
45  
46  
47  
48  
49  
50  
51  
52  
53  
54  
55  
56  
57  
58  
59  
60
1. Africa or African in the Title and diabetes or diabetic or HbA1c in the condition,  
Recruitment status: all: 90 records for 90 trials (9.10.2019)
  2. diabetes or diabetic or HbA1c in the condition  
Recruitment status: all  
Countries of recruitment: Algeria or Angola or Benin or Botswana or Burkina Faso or  
Burundi or Cameroon or Central African Republic or Chad or Congo or Cite D'ivoire:  
96 record for 63 trials
  3. diabetes or diabetic or HbA1c in the condition  
Recruitment status: all  
Countries of recruitment: Democratic Republic of Congo or Djibouti or Egypt or  
Equatorial Guinea or Eritrea or Ethiopia: 292 records for 159 trials
  4. diabetes or diabetic or HbA1c in the condition  
Recruitment status: all  
Countries of recruitment: Gabon or Gambia or Ghana or Guinea or Guinea-Bissau or  
Kenya or Lesotho or Liberia or Lybia: 22 records for 22 trials
  5. diabetes or diabetic or HbA1c in the condition

1  
2  
3 Recruitment status: all

4 Countries of recruitment: Madagascar or Malawi or Mali or Mauritania or Mauritius or  
5 Morocco or Mozambique: 96 records for 34 trials

- 6  
7  
8 6. diabetes or diabetic or HbA1c in the condition

9 Recruitment status: all

10 Countries of recruitment: Nigeria: 13 records for 13 trials

- 11  
12  
13 7. diabetes or diabetic or HbA1c in the condition

14 Recruitment status: all

15 Countries of recruitment: Namibia or Niger or Rwanda or (Sao Tome and Principe) or  
16 Senegal or Seychelles or Sierra Leone or Somalia or South Sudan or Sudan or  
17 Swaziland:

18  
19  
20 11 records for 11 trials

- 21  
22 8. diabetes or diabetic or HbA1c in the condition

23 Recruitment status: all

24 Countries of recruitment: South Africa: 1528 records for 429 trials:

- 25  
26  
27 9. diabetes or diabetic or HbA1c in the condition

28 Recruitment status: all

29 Countries of recruitment: Togo or Tunisia or Uganda or Zambia or Zimbabwe: 129  
30 records for 50 trials  
31  
32  
33  
34  
35  
36  
37  
38  
39  
40  
41  
42  
43  
44  
45  
46  
47  
48  
49  
50  
51  
52  
53  
54  
55  
56  
57  
58  
59  
60

## African Journals Online

<https://www.ajol.info/index.php/index/search/search?query=%28diabetes+or+diabetic+or+hba1c%29+and+%28random+or+randomized+or+randomised%29&dateFromYear=2004&dateFromMonth=01&dateFromDay=1&dateToYear=2020&dateToMonth=10&dateToDay=14&autohors=>

Advanced search 14.10.2020

Titel: (diabetes or diabetic or hba1c) and (random or randomized or randomised)

30 results

## African Index Medicus Database

[http://indexmedicus.afro.who.int/aim/opac\\_css/index.php?lvl=search\\_result&get\\_query=4](http://indexmedicus.afro.who.int/aim/opac_css/index.php?lvl=search_result&get_query=4)

Advanced search 14.10.2020

Titel, Expression booléenne: (diabetes or diabetic or hba1c) and (random or randomized or randomised)

122 results, no potentially eligible references

# 1 List of included and excluded studies

## 1.1 List of included studies

### Abaza 2017

Abaza H, Marschollek M. SMS education for the promotion of diabetes self-management in low & middle income countries: a pilot randomized controlled trial in Egypt. *BMC public health*. 2017;17(1):962.

Abaza H, Marschollek M, Schulze M. SMS Education for the Promotion of Diabetes Self-Management in Low & Middle Income Countries: A Randomized Controlled Trial in Egypt. *Studies in Health Technology & Informatics*. 2017;245:1209.

### Abdulrhman 2013

Abdulrhman MM, El-Hefnawy MH, Aly RH, Shatla RH, Mamdouh RM, Mahmoud DM, et al. Metabolic effects of honey in type 1 diabetes mellitus: a randomized crossover pilot study. *Journal of Medicinal Food*. 2013;16(1):66-72.

### Adibe 2013

Adibe MO, Ukwe CV, Aguwa CN. The Impact of Pharmaceutical Care Intervention on the Quality of Life of Nigerian Patients Receiving Treatment for Type 2 Diabetes. *Value in Health Regional Issues*. 2013;2(2):240-7.

Adibe MO, Aguwa CN, Ukwe CV. Cost-Utility Analysis of Pharmaceutical Care Intervention Versus Usual Care in Management of Nigerian Patients with Type 2 Diabetes. *Value in Health Regional Issues*. 2013;2(2):189-98.

### Adjei 2015

Adjei DN, Agyemang C, Dasah JB, Kuranchie P, Amoah AG. The effect of electronic reminders on risk management among diabetic patients in low resourced settings. *Journal of Diabetes & its Complications*. 2015;29(6):818-21.

### Ali 2019

Ali S, Ghanem Y, Sharaki O, Hewedy W, al. e. The impact of different regimens of vitamin d3 on glucose homeostasis in type 2 diabetic patients. *Asian journal of pharmaceutical and clinical research*. 2019;12(12):21-6.

### Amendezo 2017

Amendezo E, Walker Timothy D, Karamuka V, Robinson B, Kavabushi P, Ntirenganya C, et al. Effects of a lifestyle education program on glycemic control among patients with diabetes at Kigali University Hospital, Rwanda: A randomized controlled trial. *Diabetes Research & Clinical Practice*. 2017;126:129-37.

### Anderson 2001

1  
2  
3 Anderson RA, Roussel AM, Zouari N, Mahjoub S, Matheau JM, Kerkeni A. Potential  
4 antioxidant effects of zinc and chromium supplementation in people with type 2 diabetes  
5 mellitus. *Journal of the American College of Nutrition*. 2001;20(3):212-8.  
6  
7

#### 8 **Anyanwu 2016**

9 Anyanwu AC, Fasanmade OA, Odeniyi IA, Iwuala S, Coker HB, Ohwovoriole AE. Effect of  
10 Vitamin D supplementation on glycemic control in Type 2 diabetes subjects in Lagos,  
11 Nigeria. *Indian Journal of Endocrinology and Metabolism*. 2016;20(2):189-94.  
12  
13

#### 14 **Ashoush 2016**

15 Ashoush S, El-Said M, Fathi H, Abdelnaby M. Identification of metformin poor responders,  
16 requiring supplemental insulin, during randomization of metformin versus insulin for the  
17 control of gestational diabetes mellitus. *Journal of obstetrics and gynaecology research*.  
18 2016;42(6):640-7.  
19  
20  
21

#### 22 **Asuako 2017**

23 Asuako B, Moses MO, Eghan BA, Sarpong PA. Fasting plasma glucose and lipid profiles of  
24 diabetic patients improve with aerobic exercise training. *Ghana Medical Journal*.  
25 2017;51(3):120-7.  
26  
27

#### 28 **Beyuo 2015**

29 Beyuo T, Obed SA, Adjepong-Yamoah KK, Bugyei KA, Oppong SA, Marfoh K. Metformin  
30 versus Insulin in the Management of Pre-Gestational Diabetes Mellitus in Pregnancy and  
31 Gestational Diabetes Mellitus at the Korle Bu Teaching Hospital: A Randomized Clinical  
32 Trial. *PLoS ONE [Electronic Resource]*. 2015;10(5):e0125712.  
33  
34  
35

#### 36 **Chraibi 2017**

37 Chraibi A, Al-Herz S, Nguyen BD, Soeatmadji DW, Shinde A, Lakshmivenkataraman B, et al.  
38 An RCT Investigating Patient-Driven Versus Physician-Driven Titration of BIAsp 30 in  
39 Patients with Type 2 Diabetes Uncontrolled Using NPH Insulin. *Diabetes Therapy Research,*  
40 *Treatment and Education of Diabetes and Related Disorders*. 2017;8(4):767-80.  
41  
42  
43

#### 44 **Debussche 2018**

45 Debussche X, Besancon S, Balcou-Debussche M, Ferdynus C, Delisle H, Huiart L, et al.  
46 Structured peer-led diabetes self-management and support in a low-income country: The  
47 ST2EP randomised controlled trial in Mali. *PLoS ONE*. 2018;13(1):e0191262.  
48  
49

#### 50 **Distiller 2014**

51 Distiller LA, Nortje H, Wellmann H, Amod A, Lombard L. A 24-week, prospective,  
52 randomized, open-label, treat-to-target pilot study of obese type 2 diabetes patients with  
53 severe insulin resistance to assess the addition of exenatide on the efficacy of U-500 regular  
54 insulin plus metformin. *Endocrine practice*. 2014;20(11):1143-50.  
55  
56  
57

#### 58 **El Gayar 2019**

59  
60

1  
2  
3 El Gayar MH, Aboromia MMM, Ibrahim NA, Abdel Hafiz MH. Effects of ginger powder  
4 supplementation on glycemic status and lipid profile in newly diagnosed obese patients with  
5 type 2 diabetes mellitus. *Obesity medicine*. 2019;14.

6  
7  
8 **El-Haggag 2015**

9 El-Haggag SM, Farrag WF, Kotkata FA. Effect of ketotifen in obese patients with type 2  
10 diabetes mellitus. *Journal of Diabetes & its Complications*. 2015;29(3):427-32.

11  
12  
13 **El-Makaky 2020**

14 El-Makaky Y, Shalaby HK. The effects of non-surgical periodontal therapy on glycemic  
15 control in diabetic patients: a randomized controlled trial. *Oral diseases*. 2020;26:822-9.

16  
17  
18 **El-Shamy 2018**

19 El-Shamy FF, El-Kholy SS, Labib M, Kabel AM. Ameliorative potential of acupressure on  
20 gestational diabetes mellitus: a randomized controlled trial. *Journal of complementary and*  
21 *integrative medicine*. 2018; 16(1).

22  
23  
24 **El-Sheikh 2019**

25 El-Sheikh HM, El-Haggag SM, Elbedewy TA. Comparative study to evaluate the effect of L-  
26 carnitine plus glimepiride versus glimepiride alone on insulin resistance in type 2 diabetic  
27 patients. *Diabetes and metabolic syndrome: clinical research and reviews*.  
28 2019;13(1):167-73.

29  
30  
31  
32 **El-Sharkawy 2016**

33 El-Sharkawy HM, Anees MM, Van Dyke TE. Propolis improves periodontal status and  
34 glycemic control in patients with type 2 diabetes mellitus and chronic periodontitis: a  
35 randomized clinical trial. *Journal of periodontology*. 2016;87(12):1418-26.

36  
37  
38 **Elbarbary 2016**

39 Elbarbary NS. Effectiveness of the low-glucose suspend feature of insulin pump during  
40 fasting during Ramadan in type 1 diabetes mellitus. *Diabetes/metabolism research and*  
41 *reviews*. 2016;32(6):623-33.

42  
43  
44 **Elbarbary 2018**

45 Elbarbary NS, Ismail EAR, El-Naggag AR, Hamouda MH, El-Hamamsy M. The effect of 12  
46 weeks carnosine supplementation on renal functional integrity and oxidative stress in  
47 pediatric patients with diabetic nephropathy: a randomized placebo-controlled trial. *Pediatric*  
48 *diabetes*. 2018;19(3):470-7.

49  
50  
51  
52 **Elbarbary 2020**

53 Elbarbary NS, Ismail EAR, Zaki MA, Darwish YW, Ibrahim MZ, El-Hamamsy M. Vitamin B  
54 complex supplementation as a homocysteine-lowering therapy for early stage diabetic  
55 nephropathy in pediatric patients with type 1 diabetes: A randomized controlled trial. *Clinical*  
56 *Nutrition*. 2020;39(1):49-56.

57  
58  
59  
60 **Embaby 2016**

1  
2  
3 Embaby H, Elsayed E, Fawzy M. Insulin Sensitivity and Plasma Glucose Response to  
4 Aerobic Exercise in Pregnant Women at Risk for Gestational Diabetes Mellitus. Ethiopian  
5 journal of health sciences. 2016;26(5):409-14.  
6  
7

8 **Essien 2017**

9 Essien O, Otu A, Umoh V, Enang O, Hicks JP, Walley J. Intensive Patient Education  
10 Improves Glycaemic Control in Diabetes Compared to Conventional Education: A  
11 Randomised Controlled Trial in a Nigerian Tertiary Care Hospital. PLoS ONE  
12 2017;12(1):e0168835.  
13  
14

15 **Fairall 2016**

16 Fairall LR, Folb N, Timmerman V, Lombard C, Steyn K, Bachmann MO, et al. Educational  
17 Outreach with an Integrated Clinical Tool for Nurse-Led Non-communicable Chronic Disease  
18 Management in Primary Care in South Africa: a Pragmatic Cluster Randomised Controlled  
19 Trial. Plos medicine. 2016;13(11):e1002178.  
20  
21  
22

23 **Fayehun 2018**

24 Fayehun AF, Olowookere OO, Ogunbode AM, Adetunji AA, Esan A. Walking prescription of  
25 10 000 steps per day in patients with type 2 diabetes mellitus: a randomised trial in Nigerian  
26 general practice. British Journal of General Practice. 2018;68(667):e139-e45.  
27  
28  
29

30 **Ghoneim 2013**

31 Ghoneim EM, Abd El Ghany AA. Behavior of intraocular pressure after intravitreal injection of  
32 triamcinolone acetonide among egyptians. Ophthalmology and Therapy. 2013;2(2):121-30.  
33  
34

35 **Hailu 2018**

36 Hailu FB, Hjortdahl P, Moen A. Nurse-Led Diabetes Self-Management Education Improves  
37 Clinical Parameters in Ethiopia. Frontiers in Public Health. 2018;6:302.  
38  
39

40 **Ibrahim 2014**

41 Ibrahim MI, Hamdy A, Shafik A, Taha S, Anwar M, Faris M. The role of adding metformin in  
42 insulin-resistant diabetic pregnant women: a randomized controlled trial. Archives of  
43 Gynecology & Obstetrics. 2014;289(5):959-65.  
44  
45

46 **Krawinkel 2018**

47 Krawinkel MB, Ludwig C, Swai ME, Yang RY, Chun KP, Habicht SD. Bitter gourd reduces  
48 elevated fasting plasma glucose levels in an intervention study among prediabetics in  
49 Tanzania. Journal of Ethnopharmacology. 2018;216:1-7.  
50  
51

52 **Labhardt 2011**

53 Labhardt ND, Balo JR, Ndam M, Manga E, Stoll B. Improved retention rates with low-cost  
54 interventions in hypertension and diabetes management in a rural African environment of  
55 nurse-led care: a cluster-randomised trial. Tropical Medicine & International Health.  
56 2011;16(10):1276-84.  
57  
58  
59

60 **Maharaj 2016**

1  
2  
3 Maharaj SS, Nuhu JM. Rebound exercise: A beneficial adjuvant for sedentary non-insulin-  
4 dependent type 2 diabetic individuals in a rural environment. *Australian Journal of Rural*  
5 *Health*. 2016;24(2):123-9.

6  
7  
8 **Malek 2015**

9 Malek R, Ajili F, Assaad-Khalil SH, Shinde A, Chen JW, Van den Berg E. Similar glucose  
10 control with basal-bolus regimen of insulin detemir plus insulin aspart and thrice-daily  
11 biphasic insulin aspart 30 in insulin-naive patients with type 2 diabetes: Results of a 50-week  
12 randomized clinical trial of stepwise insulin intensification. *Diabetes & Metabolism*.  
13 2015;41(3):223-30.

14  
15  
16  
17 **Marais 2018**

18 Marais C, Hall DR, van Wyk L, Conradie M. Randomized cross-over trial comparing the  
19 diagnosis of gestational diabetes by oral glucose tolerance test and a designed breakfast  
20 glucose profile. *International Journal of Gynaecology & Obstetrics*. 2018;141(1):85-90.

21  
22  
23 **Malipa 2013**

24 Malipa M, Menon J. The relationship between compliance and quality of life among  
25 adolescents with diabetes mellitus type 1. *Medical Journal of Zambia*. 2013;40(3):93-103.

26  
27  
28 **Mash 2014**

29 Mash RJ, Rhode H, Zwarenstein M, Rollnick S, Lombard C, Steyn K, et al. Effectiveness of a  
30 group diabetes education programme in under-served communities in South Africa: a  
31 pragmatic cluster randomized controlled trial. *Diabetic Medicine*. 2014;31(8):987-93.

32 Mash R, Kroukamp R, Gaziano T, Levitt N. Cost-effectiveness of a diabetes group education  
33 program delivered by health promoters with a guiding style in underserved communities in  
34 Cape Town, South Africa. *Patient Education & Counseling*. 2015;98(5):622-6.

35  
36  
37  
38  
39 **Matter 2020**

40 Matter RM, Elbarbary NS, Ismail EAR, Darwish YW, Nada AS, Banoub VP. Zinc  
41 supplementation improves glucose homeostasis in patients with  $\beta^0$ -thalassemia major  
42 complicated with diabetes mellitus: a randomized controlled trial. *Nutrition* 2020;73.

43  
44  
45  
46 **Mohamad 2009**

47 Mohamad RH, Zekry ZK, Al-Mehdar HA, Salama O, El-Shaieb SE, El-Basmy AA, et al.  
48 Camel milk as an adjuvant therapy for the treatment of type 1 diabetes: verification of a  
49 traditional ethnomedical practice. *Journal of Medicinal Food*. 2009;12(2):461-5.

50  
51  
52 **Moustafa 2019**

53 Moustafa HAM, El Wakeel LM, Halawa MR, Sabri NA, El-Bahy AZ, Singab AN. Effect of  
54 *Nigella Sativa* oil versus metformin on glycemic control and biochemical parameters of newly  
55 diagnosed type 2 diabetes mellitus patients. *Endocrine*. 2019;65(2):286-94.

56  
57  
58  
59 **Muchiri 2016**



1  
2  
3 Muchiri JW, Gericke GJ, Rheeder P. Effect of a nutrition education programme on clinical  
4 status and dietary behaviours of adults with type 2 diabetes in a resource-limited setting in  
5 South Africa: a randomised controlled trial. *Public Health Nutrition*. 2016;19(1):142-55.

6  
7  
8 Muchiri JW, Gericke GJ, Rheeder P. Impact of nutrition education on diabetes knowledge  
9 and attitudes of adults with type 2 diabetes living in a resource-limited setting in South Africa:  
10 a randomised controlled trial. *Journal of Endocrinology, Metabolism and Diabetes of South  
11 Africa*. 2016;21(2):26-34.

#### 12 13 14 **Nteleki 2015**

15 Nteleki B, Abrahamse H, Houreld NN. Conventional podiatric intervention and phototherapy  
16 in the treatment of diabetic ulcers. *Seminars in Vascular Surgery*. 2015;28(3-4):172-83.

#### 17 18 19 **Owolabi 2019**

20 Owolabi EO, Goon DT, Ajayi AI. Efficacy, acceptability and feasibility of daily text-messaging  
21 in promoting glycaemic control and other clinical outcomes in a low-resource setting of South  
22 Africa: A randomised controlled trial. *PLoS ONE [Electronic Resource]*.  
23 2019;14(11):e0224791.

24  
25  
26  
27 Owolabi EO, Goon DT, Ajayi AI. Impact of mobile phone text messaging intervention on  
28 adherence among patients with diabetes in a rural setting: A randomized controlled trial.  
29 *Medicine*. 2020;99(12):1-8.

#### 30 31 32 **Ragheb 2020**

33 Ragheb SR, El Wakeel LM, Nasr MS, Sabri NA. Impact of Rutin and Vitamin C combination  
34 on oxidative stress and glycemic control in patients with type 2 diabetes. *Clinical nutrition  
35 ESPEN*. 2020;35:128-35.

#### 36 37 38 **Rashad 2017**

39 Rashad H, Metwally FM, Ezzat SM, Salama MM, Hasheesh A, Abdel Motaal A. Randomized  
40 double-blinded pilot clinical study of the antidiabetic activity of *Balanites aegyptiaca* and  
41 UPLC-ESI-MS/MS identification of its metabolites. *Pharmaceutical Biology*. 2017;55(1):1954-  
42 61.

#### 43 44 45 46 **RezkAllah 2019**

47 RezkAllah SS, Takla MK. Effects of different dosages of interval training on glycemic control  
48 in people with prediabetes: a randomized controlled trial. *Diabetes spectrum*.  
49 2019;32(2):125-31.

#### 50 51 52 **Saeed 2013**

53 Saeed AM. Combined vitrectomy and intravitreal injection versus combined laser and  
54 injection for treatment of intractable diffuse diabetic macular edema. *Clinical Ophthalmology*.  
55 2013;7:283-97.

#### 56 57 58 59 **Salem 2010**

1  
2  
3 Salem MA, Aboelasar MA, Elbarbary NS, Elhilaly RA, Refaat YM. Is exercise a therapeutic  
4 tool for improvement of cardiovascular risk factors in adolescents with type 1 diabetes  
5 mellitus? A randomised controlled trial. *Diabetology & metabolic syndrome*. 2010;2(1):47.

#### 8 **Sodipo 2017**

9 Sodipo OO, Adedokun A, Olusola AA. Effect of self-monitoring of blood glucose on  
10 glycaemic outcome among type 2 diabetic patients. *South african family practice*.  
11 2017;59(6):208-13.

#### 14 **Somanah 2012**

15 Somanah J, Aruoma OI, Gunness TK, Kowelssur S, Dambala V, Murad F, et al. Effects of a  
16 short term supplementation of a fermented papaya preparation on biomarkers of diabetes  
17 mellitus in a randomized Mauritian population. *Preventive Medicine*. 2012;54 Suppl:S90-7.

#### 20 **Steyn 2013**

21 Steyn K, Lombard C, Gwebushe N, Fourie JM, Everett-Murphy K, Zwarenstein M, et al.  
22 Implementation of national guidelines, incorporated within structured diabetes and  
23 hypertension records at primary level care in Cape Town, South Africa: a randomised  
24 controlled trial. *Glob Health Action*. 2013;6:20796.

#### 28 **Takenga 2014**

29 Takenga C, Berndt RD, Musongya O, Kitero J, Katoke R, Molo K, et al. An ICT-Based  
30 Diabetes Management System Tested for Health Care Delivery in the African Context.  
31 *International Journal of Telemedicine & Applications*. 2014;2014:437307.

#### 35 **Tawfik 2016**

36 Tawfik MY, Mohamed RA. The impact of communicating cardiovascular risk in type 2  
37 diabetics on patient risk perception, diabetes self-care, glycosylated hemoglobin, and  
38 cardiovascular risk. *Journal of public health*. 2016;24(2):153-64.

#### 41 **Thuita 2020**

42 Thuita AW, Kiage BN, Onyango AN, Makokha AO. Effect of a nutrition education programme  
43 on the metabolic syndrome in type 2 diabetes mellitus patients at a level 5 Hospital in Kenya:  
44 "a randomized controlled trial". *BMC Nutr*. 2020;6:30.

#### 47 **Tsobgny-Tsague 2018**

48 Tsobgny-Tsague NF, Lontchi-Yimagou E, Nana ARN, Tankeu AT, Katte JC, Dehayem MY,  
49 et al. Effects of nonsurgical periodontal treatment on glycated haemoglobin on type 2  
50 diabetes patients (PARODIA 1 study): a randomized controlled trial in a sub-Saharan Africa  
51 population. *BMC Oral Health*. 2018;18(1):28.

#### 55 **Utz 2018**

56 Utz B, Assarag B, Smekens T, Ennassiri H, Lekhal T, El Ansari N, et al. Detection and initial  
57 management of gestational diabetes through primary health care services in Morocco: An  
58 effectiveness-implementation trial. *PloS one*. 2018;13(12):e0209322.

**van der Hoogt 2017**

van der Hoogt M, van Dyk JC, Dolman RC, Pieters M. Protein and fat meal content increase insulin requirement in children with type 1 diabetes - Role of duration of diabetes. *Journal of clinical and translational endocrinology*. 2017;10:15-21.

**van Rooijen 2004**

van Rooijen AJ, Rheeder P, Eales CJ, Becker PJ. Effect of exercise versus relaxation on haemoglobin A1C in Black females with type 2 diabetes mellitus. *Qjm*. 2004;97(6):343-51.

**Webb 2015**

Webb EM, Rheeder P, Van Zyl DG. Diabetes care and complications in primary care in the Tshwane district of South Africa. *Primary care diabetes*. 2015;9(2):147-54.

Webb EM, Rheeder P, Roux P. Screening in Primary Care for Diabetic Retinopathy, Maculopathy and Visual Loss in South Africa. *Ophthalmologica*. 2016;235(3):141-9.

Webb EM, Rheeder P. A cluster-randomized trial to estimate the effect of mobile screening and treatment feedback on HbA1c and diabetes-related complications in Tshwane primary health care clinics, South Africa. *Primary care diabetes*. 2017;11(6):546-54.

**Yakoot 2019**

Yakoot M, Abdelatif M, Helmy S. Efficacy of a new local limb salvage treatment for limb-threatening diabetic foot wounds-a randomized controlled study. *Diabetes, Metabolic Syndrome and Obesity: Targets and Therapy*. 2019;12:1659.

**Yan 2014**

Yan H, Prista A, Ranadive SM, Damasceno A, Caupers P, Kanaley JA, et al. Effect of Aerobic Training on Glucose Control and Blood Pressure in T2DDM East African Males. *Isrn Endocrinology Print*. 2014;2014:864897.

## 1.2 List of excluded studies

### 1.2.1 Other design (28 references)

1. Abd El Hameed AA, Shreif HE, Mowafy HE. The role of continuing metformin therapy during pregnancy in the reduction of gestational diabetes and improving pregnancy outcomes in women with polycystic ovary syndrome. *Middle east fertility society journal*. 2011;16(3):204-8.
2. Abdelaziz TS, Sadek KM. Effect of reducing medication regimen complexity on glycaemic control in patients with diabetes. *Romanian Journal of Internal Medicine*. 2019;57(1):23-9.
3. Agboola-Abu CF, Ohwovoriole AE, Akinlade KS. The effect of oral hypoglycaemic agents on dyslipidaemia in Nigerian patients with newly diagnosed non-insulin dependent diabetes mellitus--a prospective study. *West African Journal of Medicine*. 2000;19(2):126-31.
4. Assah FK, Atanga EN, Enoru S, Sobngwi E, Mbanya JC. Community-based peer support significantly improves metabolic control in people with Type 2 diabetes in Yaounde, Cameroon. *Diabetic Medicine*. 2015;32(7):886-9.
5. Bahramikia S, Yazdanparast R. Phytochemistry and medicinal properties of *Teucrium polium* L. (Lamiaceae). *Phytotherapy Research*. 2012;26(11):1581-93.
6. Bailey CJ, Iqbal N, T'Joel C, List JF. Dapagliflozin monotherapy in drug-naive patients with diabetes: a randomized-controlled trial of low-dose range. *Diabetes, Obesity & Metabolism*. 2012;14(10):951-9.
7. Bekkouche L, Bouchenak M, Malaisse WJ, Yahia DA. The Mediterranean diet adoption improves metabolic, oxidative, and inflammatory abnormalities in Algerian metabolic syndrome patients. *Hormon- und Stoffwechselforschung / Hormones et métabolisme [Hormone and metabolic research]*. 2014;46(4):274-82.
8. Bello SI, Ganiyu KA, Dakop YO, Erah PO. Pharmacist's intervention in the control of blood sugar levels in randomised diabetes patients at a primary health care setting in Benin City. *Nigerian Quarterly Journal of Hospital Medicine*. 2012;22(4):245-8.
9. Brown J, Martis R, Hughes B, Rowan J, Crowther CA. Oral anti-diabetic pharmacological therapies for the treatment of women with gestational diabetes. *Cochrane Database of Systematic Reviews*. 2017;1:CD011967.
10. Chou HS, Truitt KE, Moberly JB, Merante D, Choi Y, Mun Y, et al. A 26-week, placebo- and pioglitazone-controlled monotherapy study of rivoglitazone in subjects with type 2 diabetes mellitus. *Diabetes, Obesity & Metabolism*. 2012;14(11):1000-9.
11. De Caterina R, Andersson U, Alexander JH, Al-Khatib SM, Bahit MC, Goto S, et al. History of bleeding and outcomes with apixaban versus warfarin in patients with atrial fibrillation in the Apixaban for Reduction in Stroke and Other Thromboembolic Events in Atrial Fibrillation trial. *American Heart Journal*. 2016;175:175-83.

12. De Luca G, Michael Gibson C, Bellandi F, Murphy S, Maioli M, Noc M, et al. Benefits of pharmacological facilitation with glycoprotein IIb-IIIa inhibitors in diabetic patients undergoing primary angioplasty for STEMI. A subanalysis of the EGYPT cooperation. *Journal of Thrombosis & Thrombolysis*. 2009;28(3):288-98.
13. El-Fattah AAA, Hamed MI, Sadek SE, Abu-Elhana AS. Insulin resistance in type II diabetes mellitus with liver cirrhosis. *Global journal of pharmacology*. 2013;7(2):109-17.
14. Fullerton B, Siebenhofer A, Jeitler K, Horvath K, Semlitsch T, Berghold A, et al. Short-acting insulin analogues versus regular human insulin for adults with type 1 diabetes mellitus. *Cochrane Database of Systematic Reviews*. 2016(6):CD012161.
15. Gessler N, Labhard ND, Stolt P, Manga E, Balo JR, Boffolo A, et al. The lesson of Monsieur Nouma: effects of a culturally sensitive communication tool to improve health-seeking behavior in rural Cameroon. *Patient Education & Counseling*. 2012;87(3):343-50.
16. Ibrahim MA, Sarhan, II, Halawa MR, Afify EN, Hebah HA, Al-Gohary EA, et al. Study of the effect of vitamin D supplementation on glycemic control in type 2 diabetic prevalent hemodialysis patients. *Hemodialysis international*. 2015;19:S11-S9.
17. Jingi AM, Noubiap JJ, Essouma M, Bigna JJ, Nansseu JR, Ellong A, et al. Association of insulin treatment versus oral hypoglycaemic agents with diabetic retinopathy and its severity in type 2 diabetes patients in Cameroon, sub-Saharan Africa. *Annals of Translational Medicine*. 2016;4(20):395.
18. Kadiri A, Al-Nakhi A, El-Ghazali S, Jabbar A, Al Arouj M, Akram J, et al. Treatment of type 1 diabetes with insulin lispro during Ramadan. *Diabetes & metabolism*. 2001;27(4 Pt 1):482-6.
19. Kamau RK, Maina FW, Kigundu C, Mati JK. The effect of low-oestrogen combined pill, progestogen-only pill and medroxyprogesterone acetate on oral glucose tolerance test. *East African Medical Journal*. 1990;67(8):550-5.
20. Moghazy AM, Shams ME, Adly OA, Abbas AH, El-Badawy MA, Elsakka DM, et al. The clinical and cost effectiveness of bee honey dressing in the treatment of diabetic foot ulcers. *Diabetes Research & Clinical Practice*. 2010;89(3):276-81.
21. Notelovitz M. Sulphonylurea therapy in the treatment of the pregnant diabetic. *South African Medical Journal Suid-Afrikaanse Tydskrif Vir Geneeskunde*. 1971;45(9):226-9.
22. Osman H, Khamis O, Elfeky M, El Amin Ali A, Abdelwahed M. Effect of short-term erythropoietin therapy on insulin resistance and serum levels of leptin and neuropeptide y in hemodialysis patients. *Indian journal of endocrinology and metabolism*. 2017;21(5):724-30.
23. Razak A, Isaacs AA. Implementation and evaluation of a weight-reduction programme for diabetic patients at a primary health care facility in the western cape: a pilot study. *South african family practice*. 2017;59(6):189-94.

- 1  
2  
3 24. Schumm-Draeger PM, Burgess L, Koranyi L, Hrubá V, Hamer-Maansson JE, de Bruin  
4 TW. Twice-daily dapagliflozin co-administered with metformin in type 2 diabetes: a 16-week  
5 randomized, placebo-controlled clinical trial. *Diabetes, Obesity & Metabolism*. 2015;17(1):42-  
6 51.  
7  
8  
9 25. Speechly DP, Buffenstein R. Appetite dysfunction in obese males: evidence for role of  
10 hyperinsulinaemia in passive overconsumption with a high fat diet. *European journal of*  
11 *clinical nutrition*. 2000;54(3):225-33.  
12  
13 26. Todowede OO, Sartorius B. Prevalence of metabolic syndrome, discrete or comorbid  
14 diabetes and hypertension in sub-Saharan Africa among people living with HIV versus HIV-  
15 negative populations: a systematic review and meta-analysis protocol. *BMJ Open*.  
16 2017;7(7):e016602.  
17  
18 27. Van Olmen J, Van Pelt M, Malombo B, Ku GM, Kanda D, Heang H, et al. Process  
19 evaluation of a mobile health intervention for people with diabetes in low income countries -  
20 the implementation of the TEXT4DSM study. *Journal of Telemedicine & Telecare*.  
21 2017;23(1):96-105.  
22  
23 28. Werfalli M, Raubenheimer P, Engel M, Peer N, Kalula S, Kengne AP, et al.  
24 Effectiveness of community-based peer-led diabetes self-management programmes (COMP-  
25 DSMP) for improving clinical outcomes and quality of life of adults with diabetes in primary  
26 care settings in low and middle-income countries (LMIC): a systematic review and meta-  
27 analysis. *BMJ Open*. 2015;5(7):e007635.  
28  
29  
30  
31  
32  
33  
34

### 1.2.2 Other population (32 references)

- 35  
36 1. Ali Hassan H, El-Gezeiry D, Nafaa TM, Baghdady I. Improved responsiveness of  
37 PCOS patients to clomiphene after CYP17a inhibitor. *Journal of assisted reproduction and*  
38 *genetics*. 2001;18(11):608-11.  
39  
40 2. Amador-Licona N, Guízar-Mendoza J, Vargas E, Sánchez-Camargo G, Zamora-Mata  
41 L. The short-term effect of a switch from glibenclamide to metformin on blood pressure and  
42 microalbuminuria in patients with type 2 diabetes mellitus. *Archives of medical research*.  
43 2000;31(6):571-5.  
44  
45 3. Ashoush S, Abou-Gamrah A, Bayoumy H, Othman N. Chromium picolinate reduces  
46 insulin resistance in polycystic ovary syndrome: randomized controlled trial. *Journal of*  
47 *obstetrics and gynaecology research*. 2016;42(3):279-85.  
48  
49 4. Ashtary-Larky D, Ghanavati M, Lamuchi-Deli N, Payami SA, Alavi-Rad S,  
50 Boustaninejad M, et al. Rapid Weight Loss vs. slow weight loss: which is more effective on  
51 body composition and metabolic risk factors? *International journal of endocrinology and*  
52 *metabolism*. 2017;15(3) (no pagination).  
53  
54  
55  
56  
57  
58  
59  
60

- 1  
2  
3 5. 6. Bashandy GMN, Boules NS, Taha FM. Effects of a single preoperative dose of  
4 N(2)-L-alanyl-L-glutamine on insulin resistance and plasma glutathione levels in the early  
5 postoperative period. *Egyptian journal of anaesthesia*. 2013;29(4):319-24.  
6  
7
- 8 6. Bays HE, Evans JL, Maki KC, Evans M, Maquet V, Cooper R, et al. Chitin-glucan  
9 fiber effects on oxidized low-density lipoprotein: a randomized controlled trial. *European*  
10 *Journal of Clinical Nutrition*. 2013;67(1):2-7.  
11
- 12 7. Belinova L, Kahleova H, Malinska H, Topolcan O, Windrichova J, Oliyarnyk O, et al.  
13 The effect of meal frequency in a reduced-energy regimen on the gastrointestinal and  
14 appetite hormones in patients with type 2 diabetes: a randomised crossover study. *Plos one*.  
15 2017;12(4):e0174820.  
16  
17
- 18 8. Campbell-Tofte JI, Mølgaard P, Josefsen K, Abdallah Z, Hansen SH, Cornett C, et al.  
19 Randomized and double-blinded pilot clinical study of the safety and anti-diabetic efficacy of  
20 the Rauwolfia-Citrus tea, as used in Nigerian traditional medicine. *Journal of*  
21 *ethnopharmacology*. 2011;133(2):402-11.10.  
22  
23
- 24 9. El-Haggag SM, Mostafa TM. Comparative clinical study between the effect of  
25 fenofibrate alone and its combination with pentoxifylline on biochemical parameters and liver  
26 stiffness in patients with non-alcoholic fatty liver disease. *Hepatology international*.  
27 2015;9(3):471-9.  
28  
29
- 30 10. Gupta V, Keshari BB, Tiwari SK, Murthy K. A comparative study of Shilajatu and  
31 Asanadi Ghana Vati in the management of Madhumeha w.s.r. to type-2 diabetes mellitus.  
32 *Ayu*. 2016;37(2):120-4.  
33  
34
- 35 11. Hashim HA, Lakany NE, Sherief L. Combined metformin and clomiphene citrate  
36 versus laparoscopic ovarian diathermy for ovulation induction in clomiphene-resistant women  
37 with polycystic ovary syndrome: a randomized controlled trial. *Journal of obstetrics and*  
38 *gynaecology research*. 2011;37(3):169-77.  
39  
40
- 41 12. Home PD, Bolli GB, Mathieu C, Deerochanawong C, Landgraf W, Candelas C, et al.  
42 Modulation of insulin dose titration using a hypoglycaemia-sensitive algorithm: insulin  
43 glargine versus neutral protamine Hagedorn insulin in insulin-naive people with type 2  
44 diabetes. *Diabetes, Obesity & Metabolism*. 2015;17(1):15-22.  
45  
46
- 47 13. Ismail NA, Ragab S, Abd El Baky ANE, Hamed M, Ibrahim ASA. Effect of oral  
48 curcumin administration on insulin resistance, serum resistin and fetuin-A in obese children:  
49 randomized placebo-controlled study. *Research journal of pharmaceutical, biological and*  
50 *chemical sciences*. 2014;5(1):887-96.  
51  
52
- 53 14. Kumari J, Mehta CS, Shukla VD, Dave AR, Shingala TM. A comparative clinical study  
54 of Nyagrodhadi Ghanavati and Virechana Karma in the management of Madhumeha. *Ayu*.  
55 2010;31(3):300-4.  
56  
57  
58  
59  
60

15. Malin SK, Hinnerichs KR, Echtenkamp BG, Evetovich TK, Engebretsen BJ. Effect of adiposity on insulin action after acute and chronic resistance exercise in non-diabetic women. *European journal of applied physiology*. 2013;113(12):2933-41.
16. Malin SK, Kullman EL, Scelsi AR, Haus JM, Filion J, Pagadala MR, et al. A whole-grain diet reduces peripheral insulin resistance and improves glucose kinetics in obese adults: a randomized-controlled trial. *Metabolism: clinical and experimental*. 2018;82:111-7.
17. Malin SK, Niemi N, Solomon TP, Haus JM, Kelly KR, Filion J, et al. Exercise training with weight loss and either a high- or low-glycemic index diet reduces metabolic syndrome severity in older adults. *Annals of nutrition & metabolism*. 2012;61(2):135-41.
18. Manaf A, Tjandrawinata RR, Malinda D. Insulin sensitizer in prediabetes: a clinical study with DLBS3233, a combined bioactive fraction of *Cinnamomum burmanii* and *Lagerstroemia speciosa*. *Drug design, development and therapy*. 2016;10:1279-89.
19. Mendez-Del Villar M, Gonzalez-Ortiz M, Martinez-Abundis E, Perez-Rubio KG, Cortez-Navarrete M. Effect of *Irvingia gabonensis* on Metabolic Syndrome, Insulin Sensitivity, and Insulin Secretion. *Journal of Medicinal Food*. 2018;21(6):568-74.
20. Mogharnasi M, TaheriChadorneshin H, Papoli-Baravati SA, Teymuri A. Effects of upper-body resistance exercise training on serum nesfatin-1 level, insulin resistance, and body composition in obese paraplegic men. *Disability and health journal*. 2018;(no pagination).
21. Nadkarni MA, Vyas SN, Baghel MS, Ravishankar B. Randomized placebo-controlled trial of Mustadi Ghanavati in hyperlipidemia. *Ayu*. 2010;31(3):287-93.
22. Ngo-Matip ME, Pieme CA, Azabji-Kenfack M, Biapa PC, Germaine N, Heike E, et al. Effects of *Spirulina platensis* supplementation on lipid profile in HIV-infected antiretroviral naïve patients in Yaounde-Cameroon: a randomized trial study. *Lipids in health and disease*. 2014;13:191.
23. Ngondi JL, Etoundi BC, Nyangono CB, Mbofung CM, Oben JE. IGOB131, a novel seed extract of the West African plant *Irvingia gabonensis*, significantly reduces body weight and improves metabolic parameters in overweight humans in a randomized double-blind placebo controlled investigation. *Lipids in health and disease*. 2009;8:7.
24. Philis-Tsimikas A, Del Prato S, Satman I, Bhargava A, Dharmalingam M, Skjoth TV, et al. Effect of insulin degludec versus sitagliptin in patients with type 2 diabetes uncontrolled on oral antidiabetic agents. *Diabetes, Obesity & Metabolism*. 2013;15(8):760-6.
25. Pieber TR, Treichel HC, Hompesch B, Philotheou A, Mordhorst L, Gall MA, et al. Comparison of insulin detemir and insulin glargine in subjects with Type 1 diabetes using intensive insulin therapy. *Diabetic Medicine*. 2007;24(6):635-42.



- 1  
2  
3 26. Rizk AY, Bedaiwy MA, Al-Inany HG. N-acetyl-cysteine is a novel adjuvant to  
4 clomiphene citrate in clomiphene citrate-resistant patients with polycystic ovary syndrome.  
5 *Fertility and sterility*. 2005;83(2):367-70.  
6  
7 27. Rost NS, Giugliano RP, Ruff CT, Murphy SA, Crompton AE, Norden AD, et al.  
8 Outcomes With Edoxaban Versus Warfarin in Patients With Previous Cerebrovascular  
9 Events: Findings From ENGAGE AF-TIMI 48 (Effective Anticoagulation With Factor Xa Next  
10 Generation in Atrial Fibrillation-Thrombolysis in Myocardial Infarction 48). *Stroke*.  
11 2016;47(8):2075-82.  
12  
13 28. Shabana W, Teleb M, Dawod T, Abu Taha H, Abdulla A, Shahin A, et al. Outcome of  
14 alpha-blockers, with or without methylprednisolone combination, in medical expulsive therapy  
15 for lower ureteric stones: a prospective randomised study. *Arab journal of urology*.  
16 2016;14(1):7-11.  
17  
18 29. Strojek K, Yoon KH, Hrubá V, Sugg J, Langkilde AM, Parikh S. Dapagliflozin Added  
19 to Glimpiride in Patients with Type 2 Diabetes Mellitus Sustains Glycemic Control and  
20 Weight Loss Over 48 Weeks: a Randomized, Double-Blind, Parallel-Group, Placebo-  
21 Controlled Trial. *Diabetes therapy*. 2014;5(1):267-83.  
22  
23 30. Timmers S, De Ligt M, Phielix E, Van De Weijer T, Hansen J, Moonen-Kornips E, et  
24 al. Resveratrol as add-on therapy in subjects with well-controlled type 2 diabetes: a  
25 randomized controlled trial. *Diabetes care*. 2016;39(12):2211-7.  
26  
27 31. Van Olmen J, Kegels G, Korachais C, de Man J, Van Acker K, Kalobu JC, et al. The  
28 effect of text message support on diabetes self-management in developing countries - A  
29 randomised trial. *Journal of Clinical & Translational Endocrinology*. 2017;7:33-41.  
30  
31 32. Vázquez C, Botella-Carretero JI, Corella D, Fiol M, Lage M, Lurbe E, et al. White fish  
32 reduces cardiovascular risk factors in patients with metabolic syndrome: the WISH-CARE  
33 study, a multicenter randomized clinical trial. *Nutrition, metabolism, and cardiovascular  
34 diseases : NMCD*. 2014;24(3):328-35.  
35  
36  
37  
38  
39  
40  
41  
42  
43

### 1.2.3 Other intervention (8 references)

- 44  
45 1. Babiker R, Elmusharaf K, Keogh MB, Saeed AM. Effect of Gum Arabic (Acacia  
46 Senegal) supplementation on visceral adiposity index (VAI) and blood pressure in patients  
47 with type 2 diabetes mellitus as indicators of cardiovascular disease (CVD): a randomized  
48 and placebo-controlled clinical trial. *Lipids in Health & Disease*. 2018;17(1):56.  
49  
50 2. Dirajlal-Fargo S, Musiime V, Cook A, Mirembe G, Kenny J, Jiang Y, et al. Insulin  
51 Resistance and Markers of Inflammation in HIV-infected Ugandan Children in the CHAPAS-3  
52 Trial. *Pediatric infectious disease journal*. 2017;36(8):761-7.  
53  
54 3. Djoumessi RN, Noubiap JJ, Kaze FF, Essouma M, Menanga AP, Kengne AP, et al.  
55 Effect of low-dose spironolactone on resistant hypertension in type 2 diabetes mellitus: a  
56  
57  
58  
59  
60

1  
2  
3 randomized controlled trial in a sub-Saharan African population. BMC Research Notes.  
4 2016;9:187.

5  
6 4. Elnashar A, Fahmy M, Mansour A, Ibrahim K. N-acetyl cysteine vs. metformin in  
7 treatment of clomiphene citrate-resistant polycystic ovary syndrome: a prospective  
8 randomized controlled study. Fertility and sterility. 2007;88(2):406-9.

9  
10 5. Elseddek M-EA, Elgindy E. Comparison between two clomiphene citrate protocols for  
11 induction of ovulation in clomiphene resistant polycystic ovary syndrome. Middle east fertility  
12 society journal. 2014;19(4):243-7.

13  
14 6. Gopalan A, Paramanund J, Shaw PA, Patel D, Friedman J, Brophy C, et al.  
15 Randomised controlled trial of alternative messages to increase enrolment in a healthy food  
16 programme among individuals with diabetes. BMJ Open. 2016;6(11):e012009.

17  
18 7. Onyechi KC, Eseadi C, Okere AU, Onuigbo LN, Umoke PC, Anyaegbunam NJ, et al.  
19 Effects of cognitive behavioral coaching on depressive symptoms in a sample of type 2  
20 diabetic inpatients in Nigeria. Medicine. 2016;95(31):e4444.

21  
22 8. Shehata M, Hamza M. Impact of high loading dose of atorvastatin in diabetic patients  
23 with renal dysfunction undergoing elective percutaneous coronary intervention: a randomized  
24 controlled trial. Cardiovascular therapeutics. 2015;33(2):35-41.

#### 25 **1.2.4 Other comparison (1 reference)**

26  
27 1. Ahmed ME, Mohammed MS, Mahadi SI. Primary wound closure of diabetic foot  
28 ulcers by debridement and stitching. Journal of Wound Care. 2016;25(11):650-4.

#### 29 **1.2.5 Other outcome (7 references)**

30  
31 1. Belkhadir J, el Ghomari H, Klocker N, Mikou A, Nasciri M, Sabri M. Muslims with non-  
32 insulin dependent diabetes fasting during Ramadan: treatment with glibenclamide. BMJ.  
33 1993;307(6899):292-5.

34  
35 2. El-Tamalawy MM, Ibrahim OM, Hassan TM, El-Barbari AA. Effect of Combination  
36 Therapy of Ezetimibe and Atorvastatin on Remnant Lipoprotein Versus Double Atorvastatin  
37 Dose in Egyptian Diabetic Patients. Journal of Clinical Pharmacology. 2018;58(1):34-41.

38  
39 3. Hassanien M, Elawamy A, Kamel EZ, Khalifa WA, Abolfadl GM, Roushdy ASI, et al.  
40 Perineural Platelet-Rich Plasma for Diabetic Neuropathic Pain, Could It Make a Difference?  
41 Pain Medicine. 2020;21(4):757-65.

42  
43 4. Lakhdar N, Denguezli M, Zaouali M, Zbidi A, Tabka Z, Bouassida A. Diet and diet  
44 combined with chronic aerobic exercise decreases body fat mass and alters plasma and  
45 adipose tissue inflammatory markers in obese women. Inflammation. 2013;36(6):1239-47.

46  
47 5. Marais C, Hall DR, van Wyk L, Conradie M. Randomized cross-over trial comparing  
48 the diagnosis of gestational diabetes by oral glucose tolerance test and a designed breakfast  
49 glucose profile. International Journal of Gynaecology & Obstetrics. 2018;141(1):85-90.

1  
2  
3 6. Saied GM, Kamel RM, Labib AM, Said MT, Mohamed AZ. The diabetic foot and leg:  
4 combined He-Ne and infrared low-intensity lasers improve skin blood perfusion and prevent  
5 potential complications. A prospective study on 30 Egyptian patients. *Lasers in Medical*  
6 *Science*. 2011;26(5):627-32.

7  
8  
9 7. Tawfik MY. The Impact of Health Education Intervention for Prevention and Early  
10 Detection of Type 2 Diabetes in Women with Gestational Diabetes. *Journal of Community*  
11 *Health*. 2017;42(3):500-10.

## 14 1.2.6

### 15 1.2.7 Other publications (41 references)

16  
17 1. Agbozo F, Abubakari A, Narh C, Jahn A. Are we missing pregnant women with  
18 gestational diabetes? Evidence from a diagnostic accuracy study comparing glycosuria,  
19 glycated haemoglobin, random and fasting glucose to oral glucose tolerance test. *Tropical*  
20 *medicine and international health Conference: 10th european congress on tropical medicine*  
21 *and international health Belgium*. 2017;22(Supplement 1):351-2.

22  
23 2. Anyanwu AC, Fasanmade OA, Coker HB, Ohwovoriole AE. Vitamin D  
24 supplementation improves glycaemia in Vitamin D deficient nigerians with diabetes mellitus.  
25 *Endocrine reviews Conference: 96th annual meeting and expo of the endocrine society,*  
26 *ENDO 2014 Chicago, IL united states Conference start: 20140621 Conference end:*  
27 *20140624 Conference publication: (varpagings)*. 2014;35(no pagination).

28  
29 3. Aronson R, Cohen O, Conget I, Runzis S, Castaneda J, de Portu S, et al. OpT2mise:  
30 a randomized controlled trial to compare insulin pump therapy with multiple daily injections in  
31 the treatment of type 2 diabetes-research design and methods. *Diabetes Technology &*  
32 *Therapeutics*. 2014;16(7):414-20.

33  
34 4. Azar ST, Echtay A, Wan Bebakar WM, Alaraj S, Berrah A, Omar M, et al. Efficacy and  
35 safety of liraglutide versus sulfonylurea both in combination with metformin during ramadan  
36 in subjects with type 2 diabetes (lira-ramadan): a randomized trial. *Journal of endocrinology,*  
37 *metabolism and diabetes of south africa Conference: 51st congress of the society for*  
38 *endocrinology, metabolism and diabetes of south africa, SEMDSA 2016 South africa.*  
39 *2016;21(1):14.*

40  
41 5. Balde N, Camara A, Sobngwi-Tambekou J, Balti EV, Tchatchoua A, Fezeu L, et al.  
42 Improving access to HbA1c in sub-Saharan Africa (IA3) cohort: cohort profile. *The Pan*  
43 *African Medical Journal*. 2017;27.

44  
45 6. Chi CT. A Multicenter, randomized, double-blind, positive controlled clinical study to  
46 assess the efficacy and safety of Acetyl L-Carnitine in the treatment of diabetic peripheral  
47 neuropathy. *Chictr*. 2008.

- 1  
2  
3 7. Elnashar A, El Maghraby H, Nafee T, Guiziry D, Fourtia I. Randomized controlled trial  
4 of the effects of metformin versus combined oral contraceptives in adolescent PCOS women  
5 through a 24 months follow up period. *Human reproduction*. 2015;30:i5.
- 6  
7 8. Evans JL, Bays H, Maki KC, Evans M, Maquet V, Cooper R, et al. Chitin-glucan fiber  
8 effects on oxidized low-density lipoprotein: a randomized controlled trial. *Circulation*.  
9 2012;125(10 SUPPL. 1).
- 10  
11 9. Goedecke JH, Mendham AE, Clamp L, Nono Nankam PA, Fortuin-de Smidt MC, Phiri  
12 L, et al. An Exercise Intervention to Unravel the Mechanisms Underlying Insulin Resistance  
13 in a Cohort of Black South African Women: Protocol for a Randomized Controlled Trial and  
14 Baseline Characteristics of Participants. *JMIR Research Protocols*. 2018;7(4):e75.
- 15  
16 10. Lanasri N, Nibouche NW, Atif L, Makhoulouf L, Zeraoulia F, Hansal F, et al. Comparison  
17 of two therapeutic education methods in diabetic patients: a randomised controlled trial.  
18 *Diabetologia Conference: 54th annual meeting of the european association for the study*  
19 *diabetes, EASD 2018 Germany*. 2018;61(Supplement 1):S433.
- 20  
21 11. Malin SK, Louis-Kullman E, Scelsi AR, Haus JM, Filion J, Godin JP, et al. Whole grain  
22 diet improves glucose tolerance, insulin sensitivity, and beta-cell function in overweight  
23 prediabetic adults. *Diabetes*. 2014;63:A78.
- 24  
25 12. Malin SK, Samat A, Wolski K, Abood B, Pothier C, Bhatt DL, et al. Gastric bypass  
26 surgery enhances ghrelin suppression and improves beta-cell function and central obesity at  
27 24 months in moderately obese adults with type 2 diabetes. *Diabetes*. 2013;62:A729.
- 28  
29 13. Mash B, Levitt N, Steyn K, Zwarenstein M, Rollnick S. Effectiveness of a group  
30 diabetes education programme in underserved communities in South Africa: pragmatic  
31 cluster randomized control trial. *BMC Family Practice*. 2012;13:126.
- 32  
33 14. Mwangi N, Bascaran C, Ng'ang'a M, Ramke J, Kipturgo M, Gichuhi S, et al. Feasibility  
34 of a cluster randomized controlled trial on the effectiveness of peer-led health education  
35 interventions to increase uptake of retinal examination for diabetic retinopathy in Kirinyaga,  
36 Kenya: a pilot trial. *Pilot feasibility stud*. 2020;6:102.
- 37  
38 15. Mwangi N, Bascaran C, Ramke J, Kipturgo M, Kim M, Ng'ang'a M, et al. Peer-support  
39 to increase uptake of screening for diabetic retinopathy: process evaluation of the DURE  
40 cluster randomized trial. *Tropical Medicine & Health*. 2020;48:1.
- 41  
42 16. Mwangi N, Ng'ang'a M, Gakuo E, Gichuhi S, Macleod D, Moorman C, et al.  
43 Effectiveness of peer support to increase uptake of retinal examination for diabetic  
44 retinopathy: study protocol for the DURE pragmatic cluster randomized clinical trial in  
45 Kirinyaga, Kenya. *BMC Public Health*. 2018;18(1):871.
- 46  
47 17. Nassar WF, El-Ansary M, Shehab T, Abdelhameed M, Saad A, Esa W, et al. Effect of  
48 cell-free mesenchymal stem cells microvesicles (MVS) and exosomes therapy on beta-cell  
49 mass in type 1 diabetes mellitus (T1DM). *Diabetes*. 2015;64:A282.
- 50  
51  
52  
53  
54  
55  
56  
57  
58  
59  
60

18. Nct. The Efficacy of Specialist Collaboration and Mobile Screening for Improving the Management of Diabetes. <https://clinicaltrials.gov/show/nct01275040>. 2010.
19. Nct. Trial on an Educative Structured Intervention by Peer Educators to Improve HbA1c of Patients With Type 2 Diabetes in the Sikasso Region in Mali. <https://clinicaltrials.gov/show/nct01153048>. 2010.
20. Nct. Propolis Improves Glycemic Control in Subjects With Type 2 Diabetes and Chronic Periodontitis. <https://clinicaltrials.gov/show/nct02794506>. 2016.
21. Nct. Community- and mHealth-Based Integrated Management of Diabetes in Primary Healthcare in Rwanda. <https://clinicaltrials.gov/show/nct03376607>. 2017.
22. Nct. Nutrition Education Intervention for Adults With Type 2 Diabetes. <https://clinicaltrials.gov/show/nct03334773>. 2017.
23. Nct. Helium-Neon Laser Therapy Versus Infrared Laser Therapy in Treating Patients With Diabetic Foot Ulcer. <https://clinicaltrials.gov/show/nct03338517>. 2017.
24. Nct. Diabetes Self-Management Education (DSME) and Its Effect on Clinical, Psychosocial, and Behavioral Outcomes. <https://clinicaltrials.gov/show/nct03185689>. 2017.
25. Noakes TD. The Women's health initiative randomized controlled dietary modification trial: an inconvenient finding and the diet-heart hypothesis. *South african medical journal*. 2013;103(11):824-5.
26. Orchard TJ, Sibomana L, Miller R. Evaluation of differing type 1 diabetes treatment regimens in youth in Rwanda. *Pediatric diabetes*. 2014;15:25-6.
27. Pengpid S, Peltzer K, Skaal L. Efficacy of a church-based lifestyle intervention programme to control high normal blood pressure and/or high normal blood glucose in church members: a randomized controlled trial in Pretoria, South Africa. *BMC Public Health*. 2014;14:568.
28. Rockers PC, Wirtz VJ, Vian T, Onyango MA, Ashigbie PG, Laing R. Study protocol for a cluster-randomised controlled trial of an NCD access to medicines initiative: evaluation of Novartis Access in Kenya. *BMJ Open*. 2016;6(11):e013386.
29. Ross SM. African mango (IGOB131): a proprietary seed extract of *Irvingia gabonensis* is found to be effective in reducing body weight and improving metabolic parameters in overweight humans. *Holistic nursing practice*. 2011;25(4):215-7.
30. Salman SA, Farghaly TA, Attallah DA, Abdel-Hafeez HA, Shaaban OM. Insulin sensitizing agent (metformin) improves clinical pregnancy rate in clomiphene citrate resistant polycystic ovarian syndrome patients with acanthosis nigricans. *Fertility and sterility*. 2014;102(3 SUPPL. 1):e139.
31. Samir Elbarbary N, Abdel Rahman Ismail E, El-Nagggar AR, Hany Hamouda M, El-Hamamsy M. Role of carnosine as an adjuvant therapy for diabetic nephropathy in children and adolescents with type 1 diabetes: relation to oxidative stress, renal functional integrity

- 1  
2  
3 and glycemic control. Pediatric diabetes Conference: 43rd annual meeting of the  
4 international society for pediatric and adolescent diabetes , ISPAD 2017 Austria.  
5 2017;18(Supplement 25):115.  
6  
7  
8 32. Sherif EM, El Tonbary KY, Abd Aziz MM. Comparative study between the use of  
9 insulin glargine and intermediate acting insulin (NPH) in type 1 diabetic children less than  
10 eight years old. *Pediatric diabetes*. 2014;15:46.  
11  
12 33. Sibomana L, Rwabufigiri B, Kaberuka V, Gishoma C, Rubanzana W, Miller RG, et al.  
13 Type 1 diabetes-related quality of life in Rwanda. *Diabetes*. 2015;64:A368.  
14  
15 34. Utz B, Assarag B, Essolbi A, Barkat A, El Ansari N, Fakhir B, et al. Improving  
16 detection and initial management of gestational diabetes through the primary level of care in  
17 Morocco: protocol for a cluster randomized controlled trial. *Reproductive Health*.  
18 2017;14(1):75.  
19  
20 35. van Olmen J, Ku GM, van Pelt M, Kalobu JC, Hen H, Darras C, et al. The  
21 effectiveness of text messages support for diabetes self-management: protocol of the  
22 TEXT4DSM study in the democratic Republic of Congo, Cambodia and the Philippines. *BMC*  
23 *Public Health*. 2013;13:423.  
24  
25 36. Vedanthan R, Kamano JH, Lee H, Andama B, Bloomfield GS, DeLong AK, et al.  
26 Bridging Income Generation with Group Integrated Care for cardiovascular risk reduction:  
27 rationale and design of the BIGPIC study. *American heart journal*. 2017;188:175-85.  
28  
29 37. Veleba J, Janovska P, Kuda O, Horakova O, Malinska H, Kazdova L, et al. Combined  
30 intervention with pioglitazone and N-3 fatty acids in metformin-treated diabetic patients.  
31 *Obesity facts*. 2015;8:213.  
32  
33 38. Viviers C, Van Rooijen AJ. Daily physical activity and diet intervention for individuals  
34 with type 2 diabetes mellitus: a randomised controlled trial. *South african journal of clinical*  
35 *nutrition*. 2010;23(3 SUPPL. 2):S35.  
36  
37 39. Wargny M, Kleinebreil L, Diop SN, Ndour-Mbaye M, Ba Diop M, Balkau B, et al. SMS-  
38 based intervention in type 2 diabetes: clinical trial in Senegal. *BMJ innovations*. 2018.  
39  
40 40. Zeghari L, Aboussaleh Y. Comparison of two approaches of nutritional education in  
41 the management of diabetes. *Annals of nutrition and metabolism Conference: 21st*  
42 *international congress of nutrition, ICN 2017 Argentina*. 2017;71(Supplement 2):903-4.  
43  
44 41. Zennaki A, Niar S, Naceur M, Aichaoui H, Ouzzaa K, Aoui A, et al. Effect of  
45 paramedical treatment codified on balance, quality of life and knowledge of teenagers  
46 suffering from T1DM persisting imbalance. *Pediatric diabetes ( varpagings)*. 2015;16:89.  
47  
48  
49  
50  
51  
52  
53  
54  
55  
56  
57  
58  
59  
60

# BMJ Open

## Randomized controlled trials on prevention, diagnosis, and treatment of diabetes in African countries - a systematic review

|                                 |                                                                                                                                                                                                                                                                                                                                                                                                                                                                                                                                                                                                                                                                                                                                                                                                                                                                      |
|---------------------------------|----------------------------------------------------------------------------------------------------------------------------------------------------------------------------------------------------------------------------------------------------------------------------------------------------------------------------------------------------------------------------------------------------------------------------------------------------------------------------------------------------------------------------------------------------------------------------------------------------------------------------------------------------------------------------------------------------------------------------------------------------------------------------------------------------------------------------------------------------------------------|
| Journal:                        | <i>BMJ Open</i>                                                                                                                                                                                                                                                                                                                                                                                                                                                                                                                                                                                                                                                                                                                                                                                                                                                      |
| Manuscript ID                   | bmjopen-2021-050021.R1                                                                                                                                                                                                                                                                                                                                                                                                                                                                                                                                                                                                                                                                                                                                                                                                                                               |
| Article Type:                   | Original research                                                                                                                                                                                                                                                                                                                                                                                                                                                                                                                                                                                                                                                                                                                                                                                                                                                    |
| Date Submitted by the Author:   | 24-Jan-2022                                                                                                                                                                                                                                                                                                                                                                                                                                                                                                                                                                                                                                                                                                                                                                                                                                                          |
| Complete List of Authors:       | Sandholzer-Yilmaz, Angelika; Martin Luther University of Halle Wittenberg Faculty of Medicine, Institute of General Practice and Family Medicine; University of Göttingen, Department of Haematology and Oncology,<br>Kroeber, Eric; Martin-Luther-Universität Halle-Wittenberg Medizinische Fakultät, Institute of General Practice and Family Medicine<br>Ayele, Wondimu; Addis Ababa University, Department of Preventive Medicine<br>Frese, T; University of Halle-Wittenberg,, Institute of General Practitce & Family Medicine of the Medical Faculty<br>Kantelhardt, Eva; Martin-Luther-University Halle-Wittenber, Institute for Medical Epidemiology, Biostatistics and Informatics<br>Unverzagt, Susanne; Institute of General Practice and Family Medicine, Martin-Luther University Halle-Wittenberg; Department of General Practice, University Leipzig |
| <b>Primary Subject Heading</b>: | Diabetes and endocrinology                                                                                                                                                                                                                                                                                                                                                                                                                                                                                                                                                                                                                                                                                                                                                                                                                                           |
| Secondary Subject Heading:      | Diagnostics, Medical education and training, Medical management, Nutrition and metabolism, Global health                                                                                                                                                                                                                                                                                                                                                                                                                                                                                                                                                                                                                                                                                                                                                             |
| Keywords:                       | Diabetes in pregnancy < DIABETES & ENDOCRINOLOGY, Diabetes & endocrinology < INTERNAL MEDICINE, General diabetes < DIABETES & ENDOCRINOLOGY                                                                                                                                                                                                                                                                                                                                                                                                                                                                                                                                                                                                                                                                                                                          |
|                                 |                                                                                                                                                                                                                                                                                                                                                                                                                                                                                                                                                                                                                                                                                                                                                                                                                                                                      |

SCHOLARONE™  
Manuscripts

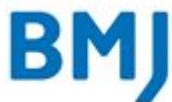

I, the Submitting Author has the right to grant and does grant on behalf of all authors of the Work (as defined in the below author licence), an exclusive licence and/or a non-exclusive licence for contributions from authors who are: i) UK Crown employees; ii) where BMJ has agreed a CC-BY licence shall apply, and/or iii) in accordance with the terms applicable for US Federal Government officers or employees acting as part of their official duties; on a worldwide, perpetual, irrevocable, royalty-free basis to BMJ Publishing Group Ltd ("BMJ") its licensees and where the relevant Journal is co-owned by BMJ to the co-owners of the Journal, to publish the Work in this journal and any other BMJ products and to exploit all rights, as set out in our [licence](#).

The Submitting Author accepts and understands that any supply made under these terms is made by BMJ to the Submitting Author unless you are acting as an employee on behalf of your employer or a postgraduate student of an affiliated institution which is paying any applicable article publishing charge ("APC") for Open Access articles. Where the Submitting Author wishes to make the Work available on an Open Access basis (and intends to pay the relevant APC), the terms of reuse of such Open Access shall be governed by a Creative Commons licence – details of these licences and which [Creative Commons](#) licence will apply to this Work are set out in our licence referred to above.

Other than as permitted in any relevant BMJ Author's Self Archiving Policies, I confirm this Work has not been accepted for publication elsewhere, is not being considered for publication elsewhere and does not duplicate material already published. I confirm all authors consent to publication of this Work and authorise the granting of this licence.



1  
2  
3 **Randomized controlled trials on prevention, diagnosis, and treatment of diabetes**  
4 **in African countries - a systematic review**  
5

6 Sandholzer-Yilmaz AS, Kroeber ES, Ayele W, Frese T, Kantelhardt EJ, Unverzagt S  
7  
8  
9

10 Mrs. Angelika Sabine Sandholzer-Yilmaz: Center of Health Sciences, Institute for  
11 Medical Epidemiology, Biostatistics and Informatics, Martin-Luther University Halle-  
12 Wittenberg, Magdeburger Straße 8, 06112 Halle (Saale), Germany.  
13 Email: angelika.sandholzer@med.uni-goettingen.de  
14

15 Dr. Eric Sven Kroeber: Center of Health Sciences, Institute of General Practice and  
16 Family Medicine, Martin-Luther University Halle-Wittenberg, Magdeburger Straße 8,  
17 06112 Halle (Saale), Germany. (Shared first author)  
18 Email: eric.kroeber@posteo.de  
19

20 Dr. Wondimu Ayele: School of Public Health, Addis Ababa University, P.O. Box: 9086,  
21 Addis Ababa, Ethiopia.  
22 Email: wondaay@gmail.com  
23  
24

25 Prof. Dr. Thomas Frese: Center of Health Sciences, Institute of General Practice and  
26 Family Medicine, Martin-Luther University Halle-Wittenberg, Magdeburger Straße 8,  
27 06112 Halle (Saale), Germany.  
28 Email: thomas.frese@uk-halle.de  
29

30 Dr. Eva Johanna Kantelhardt: Center of Health Sciences, Institute for Medical  
31 Epidemiology, Biostatistics and Informatics, Martin-Luther University Halle-Wittenberg,  
32 Magdeburger Straße 8, 06112 Halle (Saale), Germany.  
33 Email: eva.kantelhardt@uk-halle.de  
34

35 Prof. Dr. Susanne Unverzagt: Center of Health Sciences, Institute of General Practice  
36 and Family Medicine, Martin-Luther University Halle-Wittenberg, Magdeburger Straße  
37 8, 06112 Halle (Saale), Germany.  
38 Email: susanne.unverzagt@uk-halle.de  
39  
40

41 Total word count: 5915  
42  
43  
44

45 **Corresponding author:**

46 Mrs. Angelika Sabine Sandholzer-Yilmaz: University Medical Center Göttingen,  
47 Department of Haematology and Oncology, George-August-University Göttingen,  
48 Robert-Koch-Straße 40, 37075 Göttingen, Germany.  
49 Email: angelika.sandholzer@med.uni-goettingen.de  
50  
51  
52  
53  
54  
55  
56  
57  
58  
59  
60

## ABSTRACT

**Objectives** The epidemiological transition from infectious to chronic diseases leads to novel challenges in African health systems. The prevalence of diabetes mellitus (DM) is increasing dramatically. Undiagnosed and undertreated DM leads to numerous complications including end-organ damage and death. Our objectives were to collect the best locally generated evidence on DM interventions, identify knowledge gaps, and determine underexplored research areas.

**Design** A systematic review and meta-analysis of randomized controlled trials.

**Participants and setting** African patients in primary, secondary and tertiary prevention, diagnosis and treatment DM type 1 (DM1), type 2 (DM2) and gestational DM (GDM).

**Outcome** All-cause mortality, glycemic control, complications, quality of life, hospital admission, treatment adherence and costs.

**Data sources** Articles published in MEDLINE Ovid, CENTRAL, CINAHL, African Journals Online and African Index Medicus and the International Clinical Trials Registry Platform in English language without time restrictions. The systematic search was last updated in October 2020.

**Results** Out of 3736 identified publications, we included 60 eligible studies conducted in 15 countries, 75 % were conducted in urban health care settings, including 10,112 participants. We included eight studies on DM1, six on GDM, two on pre-DM, 37 on mainly DM2 including seven on DM related complications. The design of the studied intervention was heterogeneous with a focus on educational strategies. The other studies investigated the efficacy of nutritional strategies including food supplementations, pharmacological strategies and strategies to enhance physical activity. Seven studies included interventions on DM-related complications.

**Conclusions:** Research activities increased in recent years, but available evidence is still not representative for all African countries. There is a big lack of evidence in primary health care and rural settings, implementation research, pharmacological interventions, especially in poorer countries. Nevertheless, the identified studies offer a variety of effective interventions that can inform medical care and future research.

**PROSPERO registration number:** CRD42019122785.

**Keywords:** Diabetes mellitus, Africa, systematic review, randomized-controlled trial

### Strengths and limitations of this systematic review

- This systematic review includes studies at the highest level of evidence to provide an overview of the best available interventions to prevent, diagnose and treat DM in the African context.
- Inclusion criteria are restricted to randomized controlled trials conducted in African countries published in English language with no restrictions on time of publication.
- We performed a systematic search in four international databases and updated the search in October 2020.
- The main aim of our systematic review is to provide an overview of interventions for DM. Meta-analyses are restricted to regularly reported results on HbA1c as strong clinical outcome indicator of an efficient DM management.
- Limited external validity due to the origin from few countries and urban areas, results concentrate on glycemetic control due to short follow-up periods.

## INTRODUCTION

Diabetes mellitus (DM) and other non-communicable diseases (NCDs) are responsible for a double burden in African countries due to the epidemiological transition from communicable to non-communicable diseases and resulting disabilities and deaths (1-3). In Africa, around 19.4 million adults are living with DM. Prevalence rates range from 4.7 % in Sub Saharan Africa (SSA) to 12.2 % in the Middle East and North Africa region (4). Due to the increasing prevalence of risk factors such as obesity and westernized lifestyle, the prevalence of DM is expected to increase by 96 % in SSA until 2045 (4). Currently, about 50 to 60 % of adults living with DM in African countries are undiagnosed (4, 5). Low awareness as well as genetic differences and lifestyle habits result in very heterogeneous prevalence rates of DM between different countries in Africa as well as rural and urban regions (6, 7). Undiagnosed and undertreated DM can result in organ damage, and lead to complications like cardiovascular diseases, peripheral neuropathy, retinopathy and diabetic foot (7, 8). Moreover, these factors attribute to substantial financial costs for households and governments (9). Recently, almost one fifth of COVID-19 deaths in African countries occurred among DM patients (10).

The United Nations 2030 Agenda aims to reduce the burden of premature mortality from NCD including DM through improvement in prevention and treatment (11). Proven and effective actions to prevent or delay the onset of DM base on the empowerment of the population, patients and health care providers (12). Measures on DM include early detection in primary health-care settings, lifestyle modifications including diet, physical activity and, if necessary, medication. Primary prevention programs include lifestyle measures to reduce consumption of sugar-sweetened beverages, mandatory detailed labels on food packaging as well as education and awareness campaigns to increase physical activity are crucial since onset of DM can be detained (13). Moreover, health systems must ensure technical and financial resources as well as training of healthcare staff to recognize the symptoms of DM, to perform and interpret diagnostic tests and provide adequate treatment and care (4). Since DM patients need regular specialist assessment, a functioning referral system is necessary (14). Concerning pharmacotherapy, prioritization of metformin, gliclazide and human insulin is recommended (15). Glucometers, needles and test strips should be provided for people with DM (4).

Only a fraction of patients in African countries have access to the same treatment as recommended in high-income countries (16, 17). At the moment, most guideline recommendations in LMIC are based on studies conducted in high-income Western countries (18). These general management strategies have to be adjusted to local

1  
2  
3 contexts in African countries including environmental, cultural and social aspects like  
4 the relatively young age of patients, co-infections, long distances to health-care  
5 facilities, traditional beliefs, decision making in the families and socioeconomic status.  
6 Furthermore, there is a huge genetic diversity on the African continent (19, 20) .  
7

8  
9 The purpose of this review was to collect the best locally generated evidence,  
10 regarding preventive, diagnostic and therapeutic intervention on DM, as the lack of  
11 evidence is one of the major challenges to prevent and control DM in African countries.  
12  
13 Therefore, we aimed to address existing knowledge gaps and identify unexplored  
14 research areas in the African context. This may support the formulation of local  
15 evidence-based strategies to systematically strengthen clinical and preventive  
16 capacities of healthcare systems in African countries.  
17  
18  
19  
20  
21

## 22 **METHODS**

23 We prospectively registered a protocol of this systematic review in the PROSPERO  
24 International Prospective Register of systematic reviews (CRD42019122785). This  
25 systematic review follows the recommendations of the Preferred Reporting Items for  
26 Systematic reviews and Meta-Analyses (PRISMA) (21) and the methods described in  
27 the Cochrane Handbook for Systematic Reviews of Interventions (22).  
28  
29  
30  
31

### 32 **Inclusion criteria and exclusion criteria**

33  
34 This systematic review includes studies conducted in African countries on the efficacy  
35 of interventions for prevention, diagnosis and treatment of patients with DM including  
36 prediabetes, type 1 (DM1), type 2 (DM2) and gestational DM (GDM). Primary outcome  
37 was defined to be all-cause mortality. Secondary outcomes included glycemic control  
38 (HbA1c, fasting serum or plasma glucose, insulin resistance, oral glucose tolerance  
39 test), quality of life, treatment adherence, hospital admissions, complications of DM and  
40 resulting costs (see Table 1 for detailed inclusion criteria).  
41  
42  
43  
44

45 We included full-text publications on randomized controlled trials (RCTs) (e.g.  
46 individual RCTs, cluster-RCTs and randomized cross-over trials) according to the  
47 Consolidated Standards of Reporting Trials (CONSORT) (23) published in English  
48 language. We excluded international multicenter studies with less than 50 % of sites in  
49 African countries to ensure that the study location was in Africa.  
50  
51  
52

|                                                   |                                                                                                                                                                                                                                                                                                                                                                                        |
|---------------------------------------------------|----------------------------------------------------------------------------------------------------------------------------------------------------------------------------------------------------------------------------------------------------------------------------------------------------------------------------------------------------------------------------------------|
| 53 Design and setting                             | RCTs, mainly conducted in African countries (at least 50 % African countries in international studies)                                                                                                                                                                                                                                                                                 |
| 54<br>55<br>56<br>57<br>58<br>59<br>60 Population | African patients in primary, secondary or tertiary prevention with a clinical diagnosis of <ul style="list-style-type: none"> <li>• Prediabetes</li> <li>• Diabetes mellitus type 1 (DM1, due to autoimmune <math>\beta</math>-cell destruction)</li> <li>• Diabetes mellitus type 2 (DM2, due to a progressive loss of adequate <math>\beta</math>-cell insulin secretion)</li> </ul> |

|                                                                                                                                                                                                                   |                                                                                                                                                                                                                                                                                                                                                                                                  |
|-------------------------------------------------------------------------------------------------------------------------------------------------------------------------------------------------------------------|--------------------------------------------------------------------------------------------------------------------------------------------------------------------------------------------------------------------------------------------------------------------------------------------------------------------------------------------------------------------------------------------------|
|                                                                                                                                                                                                                   | <ul style="list-style-type: none"> <li>Gestational diabetes (diagnosed in the second or third trimester of pregnancy that was not clearly overt diabetes prior to gestation)</li> </ul> <p>As described by the authors</p>                                                                                                                                                                       |
| Interventions                                                                                                                                                                                                     | All interventions to of prevent, diagnose and treat diabetes                                                                                                                                                                                                                                                                                                                                     |
| Comparison                                                                                                                                                                                                        | Placebo or standard care<br>Another intervention or the same intervention with a different dose or timing                                                                                                                                                                                                                                                                                        |
| Outcome                                                                                                                                                                                                           | <p><u>Primary:</u> all-cause mortality</p> <p><u>Secondary:</u></p> <ul style="list-style-type: none"> <li>glucose control (HbA1c, oral glucose tolerance test, insulin resistance, fasting serum or blood glucose)</li> <li>complications</li> <li>quality of life</li> <li>hospital admission</li> <li>treatment adherence</li> </ul> <p><u>Additional:</u> costs<br/>at longest follow-up</p> |
| Publications                                                                                                                                                                                                      | Full-text publications according to CONSORT                                                                                                                                                                                                                                                                                                                                                      |
| <p>CONSORT: Consolidated Standards of Reporting Trials; DM: Diabetes mellitus; DM1: Type 1 diabetes; DM2: Type 2 diabetes; GDM: Gestational diabetes; HbA1c: hemoglobin A1c; RCT: randomized controlled trial</p> |                                                                                                                                                                                                                                                                                                                                                                                                  |

**Table 1:** Inclusion and exclusion criteria

### Systematic search

We performed a systematic search in electronic bibliographic databases (MEDLINE Ovid, CENTRAL, International Clinical Trials Registry Platform of the WHO) as planned in the protocol and added a search in CINAHL and regional electronic databases (African Journals Online and African Index Medicus) (see Online Supplemental File 1 material). All searches were performed without time constrictions. The last search was conducted in October 2020. Search strings were based on Medical Subject Headings (MeSH) and terms on DM, Africa, a list of all 54 African countries and terms related to RCTs. All references retrieved from the literature search were exported into a reference manager software (EndNote) (24). Duplicate references were identified in case of congruence of authors, title, year and journal and thusly deleted. The search strategy is available in the supplementary file.

### Study selection and data extraction.

Two authors independently checked titles and abstracts based on the inclusion criteria (Table 1). The full texts of all potentially eligible papers were assessed for final inclusion. All disagreements were resolved by discussion until consensus was obtained (21). All reported information on the following were extracted and checked by another author:

- publications, registration and design,
- time and place (country, urban/ rural setting and health care setting)

- study population (inclusion and exclusion criteria, sample size and baseline characteristics on age, gender, type and length of DM, body mass index (BMI) and glycaemic control at baseline)
- intervention and control groups with the number of randomized participants per group and duration of the interventions
- outcomes (classified into primary, secondary, non-specified) and
- results on pre-planned outcomes within the longest follow up period with intervention effects with their 95 % confidence intervals (CI) and level of significance.

The study names were defined by the surname of the first author and the year of the first full-text publication of the results. We compared study and patient characteristics across studies to ensure that each included study represents a unique publication of study data. In cross-over RCTs, only data from the first period were used (25).

### **Quality assessment and risk of bias**

Risk of bias was judged based on seven specific categories (sequence generation, allocation concealment, blinding of participants/personnel, blinding of outcome assessors, incomplete outcome data, selective outcome reporting and other sources of bias) of the Cochrane risk of bias tool as 'low', 'high' or 'unclear' (22). Judgments were done by two of the authors and all discrepancies were resolved by discussion.

Judgments on blinding and incomplete outcome data were based on the primary outcome of included studies. Selective outcome reporting was defined as low when the study protocol with pre-defined primary and secondary outcomes was available and high when any result of pre-planned outcomes was missing. Incomplete outcome data was judged as high when more than 10% of randomized participants dropped out from analyses. Other sources of bias were judged as high risk of bias including missing reporting of sample size calculation, no description of a primary endpoint, and relevant differences of main baseline characteristics between intervention and control groups (22).

### **Data synthesis**

The results of all pre-defined outcomes were described. Effect sizes on HbA1c for the longest follow-up period were visualized in forest plots using RevMan (26). Negative mean differences (MDs) describe lower HbA1c in the intervention compared to the control group. Statistically significant results on HbA1c with MDs over 0.25 % for HbA1c were considered clinically relevant. Heterogeneity was interpreted based on the

1  
2  
3 I<sup>2</sup> statistics as not important (I<sup>2</sup> < 30 %), moderate (30-60 %) and substantial (I<sup>2</sup> > 60 %)  
4 (22).  
5

### 6 **Protocol registration**

7  
8 We registered a protocol of this systematic review on the PROSPERO website:  
9 <https://www.crd.york.ac.uk/prospero/> under the registration number:  
10 CRD42019122785.  
11  
12  
13  
14

### 15 **Patient and Public Involvement**

16 There is no patient involved  
17  
18  
19  
20  
21  
22  
23  
24  
25  
26  
27  
28  
29  
30  
31  
32  
33  
34  
35  
36  
37  
38  
39  
40  
41  
42  
43  
44  
45  
46  
47  
48  
49  
50  
51  
52  
53  
54  
55  
56  
57  
58  
59  
60



## RESULTS

A total of 2865 references were identified from electronic databases and 871 additional trials from the Clinical Trials Registry Platform were checked. We evaluated 185 potentially eligible full-text publications and included 60 eligible studies in 68 publications in this review (Figure 1 and Supplementary file).

**Figure 1:** PRISMA flow chart describing the process of study selection

### Setting

In total 60 studies, which were conducted in 64 study centers of 15 African countries; North Africa (33 studies from four countries), West Africa (10 studies from three countries), East Africa (seven studies from 7 countries), Central Africa (three studies from two countries) and Southern Africa (11 studies only from South Africa) were included. Two studies (Malek 2015 and Chraibi 2017) were conducted in more than one African country and partially conducted in non-African countries. Chraibi (2017) was conducted in Egypt, Morocco, South Arabia and Vietnam. Malek (2015) included four study centers in Algeria, Tunisia, Egypt and South Africa. Those additional study centers are presented in brackets behind the country names in Figure 2. Egypt, South Africa and Nigeria are the three study centers included most often in this review (Figure 2 and supplementary Table 1 available in the supplement).

**Figure 2:** Geographical regions, countries, and type of DM of the included studies

Seventy-five percent of the studies (45/60) were set in urban areas, 5 % (3/60) were in rural areas only. The setting of the remaining 20 % (12/60 studies) was mixed or remained unclear. The majority, 83 % (50/60) of the studies, were conducted in secondary and tertiary health care centers, while 17 % (10/60) took place in primary care settings.

Though the search had no time restrictions, the oldest eligible study (Anderson 2001) was published in 2001. More than 60 % of the studies were published since 2015, and 22 % of them had been published in 2019 or 2020 (see supplementary Table 1 available in the supplement).

### Design

Fifty parallel-group studies randomized individual participants with DM. Six cluster-randomized studies (Fairall 2016, Labhardt 2011, Mash 2014, Steyn 2013, Utz 2018,

1  
2  
3 Webb 2015) randomly assigned health care facilities to intervention and control groups.  
4 In three randomized cross-over studies (Abdulrhman 2013, Krawinkel 2018, van der  
5 Hoogt 2017) each participant received different interventions in a random sequence,  
6 and in one study (Ghoneim 2013) each patient received two different treatment doses  
7 for each eye based on a random allocation of eyes and doses.  
8  
9  
10

### 11 **Interventions for patients with pre-DM**

12  
13 Two studies randomized a total of 112 overweight or obese patients (BMI 25–35 kg/m<sup>2</sup>)  
14 with pre-DM (HbA1c 5.7-7.5 %) and a mean age of 32.9 and 47.5 years (see  
15 supplementary Table 1: Characteristics and results of studies on patients with pre-DM  
16 available in the supplement). These studies stated the efficacy regarding glycemic  
17 control of low and high volume, high-intensity interval training strategies (RezkAllah  
18 2019), and the consumption of bitter melon to improve glucose control (Krawinkel  
19 2018).  
20  
21  
22  
23  
24  
25

### 26 **Interventions for patients with DM1**

27  
28 A total of 8 studies were conducted including 595 patients diagnosed with DM1  
29 (Abdulrhman 2013, Elbarbary 2016, Elbarbary 2018, Elbarbary 2020, Malipa 2013,  
30 Mohamad 2009, Salem 2010, van der Hoogt 2017) (see supplementary Table 2  
31 Characteristics and results of studies on patients with DM1 available in the  
32 supplement). They mainly included children, adolescents, and young adults with a  
33 mean age between 10.4-19.9 years. The mean duration of DM ranged from 3.5 to 8.6  
34 years and the mean baseline HbA1c from 7.21 to 9.52 %. The studies investigated  
35 heterogeneous strategies. Malipa 2013 showed the efficacy of weekly meetings to  
36 improve treatment compliance, reduce impact and worries about DM and improve  
37 general life satisfaction in adolescents. Salem 2010 evaluated the efficacy of two  
38 exercise programs to reduce cardiovascular risk with no relevant effect on glucose  
39 control. Three studies investigated different nutritional strategies and stated the  
40 beneficial effects of honey (Abdulrhman 2013) and camel milk (Mohamad 2009) on  
41 glucose control. Meals with low fat and protein (van der Hoogt 2017) caused less  
42 frequent hypoglycemic events. Elbarbary 2016 showed the efficacy of a low-glucose  
43 suspension algorithm during Ramadan to reduce the number of hypo- and  
44 hyperglycemic excursions. Two studies on food supplementation stated improved  
45 glycemic control with carnosine (Elbarbary 2018), but no benefit from a vitamin B  
46 complex (Elbarbary 2020).  
47  
48  
49  
50  
51  
52  
53  
54  
55  
56  
57  
58  
59  
60

## Interventions for patients with DM2

A total of 44 studies were conducted including 8881 patients suffering from DM2 or different diabetic illnesses (see supplementary Table 3: Characteristics and results of studies on patients with DM2 available in the supplement). Most studies included patients with a mean age between 50 and 60 years, only four studies included younger patients (Adjei 2015, El Gayar 2019, Matter 2020, Maharaj 2016). Most studies included more females than males. These studies presented a wide variety of patients in different stages of DM2 and general conditions. They ranged from newly diagnosed DM (El Gayar 2019, Labhardt 2011, Mostafa 2019, Owolabi 2019, Somanah 2012), non-insulin dependency or oral insulin therapy (Adibe 2013, Ali 2019, Fayehun 2018, Maharaj 2016, Malek 2015, Ragheb 2020) to durations of over 10 years with severe DM related complications (Abaza 2017, Nteleki 2015, Tsobigny-Tsague 2018, El-Shakawy 2016, Ghoneim 2013, Saeed 2013, Yakoot 2019). Thus, mean baseline HbA1c ranged from 6.75% to 11.1%. Most studies included high proportions of overweight and obese participants with mean BMIs ranging from 22.4 to 40.8 kg/m<sup>2</sup>.

## Educational strategies

A total of 19 studies with 6942 patients and follow-up periods between 2-14 months investigated the impact of educational strategies on diabetes treatment. These included providing information about lifestyle modification measures, dietary recommendations, drug-based therapy, DM-related complications and self-management. Training sessions were provided based on group-based educational sessions or individual treatment plans by nursing staff or pharmacists and complemented by lectures, discussion services, brochures, newsletters, computer programs, electronic communication devices and tele-monitoring systems. Three of these studies were led by nurses (Adibe 2013, Hailu 2018, Labhardt 2011) and two cluster-randomized studies trained nurses to expand their role in the treatment of patients with NCDs (Fairall 2016) or aimed to improve guideline implementation in the treatment of patients with DM (Steyn 2013).

Three studies (Abaza 2017, Adjei 2015, Labhardt 2011) reported results on treatment adherence. All strategies lead to improved adherence, measured by improved perception of patients to treatment recommendations (Abaza 2017) or higher regularity of appointment schedules (Adjei 2015, Labhardt 2011). Two studies (Adibe 2013, Mash 2014) reported results on costs with lower costs for patients receiving educational strategies. Two studies reported fewer admissions to different health-care facilities (hospital or emergency room and clinic visits) (Abaza 2017, Chraibi 2017).

1  
2  
3 Results on quality of life were reported in two studies with follow-up periods over 12  
4 months and conflicting results. A structured self-care education program by  
5 pharmacists and nurses (Adibe 2013) improved quality of life, but no benefit was  
6 shown after group education by trained professionals (Mash 2014).  
7  
8

9 The majority of the educational strategies resulted in lower mean HbA1c levels in the  
10 intervention groups with a clinically relevant mean decrease of -0.66 % (95 %-CI -0.94  
11 to -0.39) and substantial heterogeneity between results of different studies ( $I^2=64\%$ )  
12 (Figure 3).  
13  
14  
15  
16  
17  
18

19 **Figure 3:** Results of educational strategies on HbA1c levels or changes of HbA1c  
20 levels of patients with DM2  
21  
22  
23

### 24 **Strategies to enhance physical activity**

25  
26 Five studies with 359 participants evaluated the efficacy of different strategies to  
27 enhance physical activity on glucose control. Strategies included counselling, setting  
28 goals and training sessions with different intensities or both over periods between 8-12  
29 weeks.  
30  
31

32 Two studies were successful in lowering HbA1c where patients were given goals to  
33 accumulate 10,000 steps per day (Fayehun 2018) or patients were allocated to  
34 rebound exercise (Maharaj 2016). A third study investigated the effects of aerobic  
35 exercise training and was able to decrease fasting plasma glucose (27).  
36  
37

38 Two other exercise interventions failed to reduce HbA1c by incremental exercises  
39 compared to relaxation (Van Rooijen 2004) or higher intensity of exercises (Yan 2014)  
40 (Figure 4). Results were not pooled due to considerable heterogeneity with different  
41 directions of treatment effects.  
42  
43  
44  
45  
46  
47

48 **Figure 4:** Results of strategies to enhance physical activity on HbA1c levels of patients  
49 with DM2  
50  
51  
52

### 53 **Pharmacological strategies**

54  
55 Three studies with 479 participants tested the efficacy of pharmacological treatment  
56 strategies on glucose control of patients with DM2. El-Haggar 2015 found ketotifen and  
57 glimepiride an effective dual therapy. Malek 2015 described the non-inferiority of once-  
58  
59  
60

1  
2  
3 daily basal-bolus insulin analogues and thrice daily insulin therapy. Distiller 2014 did  
4 not find an additional improvement with exenatide in addition to insulin and metformin  
5 therapy on glycemic control.  
6  
7

### 8 **Strategies on food supplementations**

9  
10 Several different food supplementations were tested in 10 studies including 762  
11 participants. Vitamin D3 supplementation had a positive effect on glycemic control in  
12 two studies (Ali 2019, Anyanwu 2016). Four studies tested the effect of plant-based  
13 substances. Ginger powder and balantines aegyptiaca (desert date) extract regimes  
14 supported glucose control (El Gayar 2019, Rashad 2017). Nigella sativa (black cumin)  
15 oil capsules slightly improved glucose control but were inferior to metformin (Moustafa  
16 2019). A regime based on fermented papaya did show beneficial results (Somanah  
17 2012). Anderson 2001 and Matter 2020 showed positive effects of zinc/ chromium in  
18 chronic DM and zinc supplementation in diabetic beta-thalassemia major patients. The  
19 addition of rutin and vitamin C did not improve the results of oral antidiabetics (Ragheb  
20 2020). The addition of l-carnitine improved diabetic control achieved by glimepiride  
21 treatment (El-Sheikh 2019).  
22  
23  
24  
25  
26  
27  
28  
29

### 30 **Strategies on the treatment of DM related complications**

31  
32 Seven studies with 351 participants and follow-up periods between 3-12 months  
33 evaluated different strategies to treat possibly DM-related complications including  
34 periodontitis (3 studies), foot ulcerations (2 studies) and macular edema (2 studies).  
35 El-Makaky 2020 and Tsobgny-Tsague 2018 described the benefit of immediate vs.  
36 delayed non-surgical periodontal interventions on glucose control and El-Sharkawy  
37 2016 stated the effectiveness of propolis as an additive in periodontitis treatment. Two  
38 studies stated a benefit of combined phototherapy and podiatric management (Nteleki  
39 2015) and an additional local ointment application of royal jelly and panthenol (Yakoot  
40 2019) on the healing of lower extremity ulcers. Ghoneim 2013 and Saeed 2013 tested  
41 different diabetic macular edema treatment strategies. Both studies described generally  
42 positive treatment effects but also considerable adverse events including rise of intra  
43 ocular pressure and glaucoma.  
44  
45  
46  
47  
48  
49  
50  
51  
52

### 53 **Interventions for patients with DM in a pregnant woman**

54  
55 Six studies included a total of 574 pregnant women at increased risk for gestational DM  
56 (GDM) (Embaby 2016), with newly diagnosed GDM (Utz 2018, El-Shamy 2018,  
57 Ashoush 2016) or with newly diagnosed GDM or pre-existing DM (Beyuo 2015, Ibrahim  
58 2014) between the 20<sup>th</sup> and 34<sup>th</sup> week of pregnancy. The mean age ranged from 24.2-  
59  
60

1  
2  
3 33.3 years (see supplementary Table 4: Characteristics and results of studies on  
4 pregnant women with DM available in the supplements).

5  
6 Three studies (Ashoush 2016, Beyuo 2015, Ibrahim 2014) with 289 participants  
7 examined metformin as an additional medication to insulin in comparison to insulin  
8 therapy only. Effects on glycemic control of metformin supported therapy ranged from a  
9 relevant decrease (Ashoush 2016) to no effect on fasting plasma glucose, but  
10 beneficial effect on two hour plasma glucose in a 75 g OGTT (Beyuo 2015) in women  
11 without insulin resistance. Adding metformin to insulin therapy of pregnant women with  
12 insulin resistant diabetes was associated with several benefits concerning the time of  
13 hospital stay, reduced occurrence of maternal or neonatal hyperglycemia, less  
14 neonatal intensive care unit (NICU) admissions and reduced cases of respiratory  
15 distress syndrome (Ibrahim 2014).

16  
17 The other studies (285 participants) investigated non-pharmacological interventions.  
18 The tested interventions were aerobic exercise program (treadmill walking) (Embaby  
19 2016), acupressure (El-Shamy 2018) and screening for GDM, followed by nutritional  
20 and exercise counseling for positive tested women (Utz 2018). The aerobic exercise  
21 program resulted in a relevant reduction of fasting plasma glucose until delivery  
22 (Embaby 2016). The acupressure intervention did not manage to show a benefit  
23 regarding glycemic control (El-Shamy 2018). Screening, counselling and intensive  
24 follow-up were able to improve glycemic control and reduce the number of newborns  
25 with macrosomia (Utz 2018).

### 36 37 38 **Potential biases**

39  
40 None of the included studies was categorized as low risk of bias in all seven domains  
41 only (see supplementary Table 5: Judgement on risk of bias available in the  
42 supplements).

43  
44 The most common restriction on study quality was found in the domain performance  
45 bias due to a lack of blinding of participants and personnel in 48 studies. Detection bias  
46 due to blinding of the outcome assessors was judged as high or unclear in 38 studies.  
47 14 studies with high risk of bias due to no blinding of participants and personnel,  
48 reported adequate methods to ensure blinding of the outcome assessors.

49  
50 Another frequent problem was an incomplete analyses of outcome data in 26 studies  
51 defined as a loss to follow-up over 10 % of randomized participants or per-protocol  
52 analyses.

53  
54 In 23 studies a protocol was available. Risk of bias due to selective outcome reporting  
55 was judged as low in 15 studies. High risk of bias, meaning lack of reporting of results  
56  
57  
58  
59  
60

1  
2  
3 of some pre-planned outcomes was judged in eight studies (Abdulrhman 2013, Beyuo  
4 2015, Elbarbary 2020, Matter 2020, Owolabi 2019, Somanah 2012, Utz 2018 Yakoot  
5 2019).  
6  
7

8 In the domain sequence generation, two studies were assessed as high risk. El- Nteleki  
9 2015 randomized only seven patients into three different treatment groups. Shamy  
10 2018 used a non-probability sampling method on the basis of the hospital admission  
11 code and was subsequently judged as high risk in domains sequence generation and  
12 allocation concealment.  
13  
14

15 In 31 studies, we identified further methodological limitations including missing  
16 reporting of information on sample-size calculation, definition of primary and secondary  
17 target criteria, relevant differences regarding baseline characteristics or reporting of  
18 intermediate results only.  
19  
20  
21  
22  
23  
24  
25  
26  
27  
28  
29  
30  
31  
32  
33  
34  
35  
36  
37  
38  
39  
40  
41  
42  
43  
44  
45  
46  
47  
48  
49  
50  
51  
52  
53  
54  
55  
56  
57  
58  
59  
60

## DISCUSSION

This systematic review describes interventions from 60 studies to summarize the available randomized trials on to prevention, diagnosis and treatment of DM with a total of 12,113 participants from 15 African countries. Several promising interventions were identified that can be used in settings with limited resources or involved locally available materials. Despite a trend of increasing research activity in recent years, many areas of diabetes research in African countries are still underexplored leaving knowledge gaps that should be tackled in the future.

### Scarcity of randomized DM trials in African countries

While 60 included randomized trials are not nothing it also means an average only slightly higher than one randomized DM study per country for all types of diabetes that has ever been conducted and published. Only two studies on pre-diabetic interventions have been conducted, despite a clear need and aim to tackle early to avoid the future DM burden that is expected to arise (17). Implementation research, considered important in addressing know-do gaps in real-world settings, especially in primary care settings are still very rare (28). Implementing evidence-based care while observing, evaluating and publishing it's result deems crucial in the massive challenge of creating diabetes care infrastructure for millions of diabetes patients. Nevertheless, forty-three of the 60 studies have been conducted since 2015 demonstrating a positive trend of research activity.

### Rural vs. urban, primary vs. secondary care and geographic disparities

Three out of four studies were set in urban areas and only 5 % (3/60) were set in rural areas only. Despite decreasing population shares over the last decades, still almost 60 % of people in Sub-Saharan Africa are living in rural areas with rising absolute numbers (currently about 667 million) (29). Despite diabetes being considered to be associated with westernized lifestyle more prevalent in urban areas, prevalence rates in rural areas are still high, in some parts even higher (30, 31).

Moreover, the majority (83 %) of the studies were conducted in secondary and tertiary health care centers, leaving less than one fifth in primary care settings where most routine and day-to-day diabetes care should be carried out to support people in their everyday life with this chronic long-term illness to prevent long-term consequences.

Another considerable aspect is the geographical distribution of the conducted studies. Almost half (46%) of the included trial were conducted in Egypt, the country ranking 2<sup>nd</sup> on the African Infrastructure Development Index 2018 with the highest prevalence in



1  
2  
3 Northern Africa (32). South Africa, ranking fourth on the index, contributed another  
4 share of 18% (11 studies) (7). Almost three quarters of the studies were set in the top  
5 ten ranking countries on that list, all Northern and Southern Africa leaving huge blank  
6 spaces in Central, Western and Eastern Africa including countries with high  
7 prevalences including Kenya and Zimbabwe and pointing to both the infrastructural  
8 necessities of research as well as the structural development that is still ahead before  
9 to increase research activity (33). The broad majority of included studies was  
10 conducted in urban settings, this is likely due to the better health care infrastructure  
11 and thusly the increased practicability of research. Health care workers, including  
12 doctors and nurses, seem to prefer providing services in urban areas leading to an  
13 even higher deficit of health care access in rural areas. The consequence is limited  
14 generalizability of the results on the needs of the rural population.  
15  
16  
17  
18  
19  
20  
21  
22  
23

### 24 **Screening strategies to diagnose DM and its complications**

25  
26 The rate of undiagnosed patients with DM is estimated to be between 3.9 % in SSA  
27 (34) and 12 % in North Africa (35). This might be related to genetic disparities in the  
28 development level of the health care system and awareness in the general population  
29 (19). The high rates of undiagnosed DM highlight a high need for research on and  
30 implementation of DM screening strategies in the African context. We identified two  
31 studies (36-38) investigating primary care strategies to detect and manage women with  
32 GDM (36) and screen diabetic patients for complications (39). The observed GDM  
33 prevalence of 23.7% among pregnant Moroccan women underlines the importance of  
34 regular screening and management to enable early interventions at a primary care  
35 level (36). A diabetic population receiving primary care found a high rate of  
36 complications including retinopathy, maculopathy, neuropathy, nephropathy, possible  
37 infarction and severe erectile dysfunction (37-39).  
38  
39  
40  
41  
42  
43  
44  
45

### 46 **Intervention for patients with pre-DM for primary prevention of DM**

47  
48 We identified two studies patients (40, 41) with elevated blood glucose levels below  
49 diagnosis criteria of DM improving glucose levels via interval training bitter melon, a  
50 plant with antidiabetic properties that is consumed in many Asian as well as some  
51 African countries. Both studies offer effective strategies, but further research is  
52 necessary, exemplarily on early educational strategies, as a measure of patient  
53 empowerment and early tackling of DM (42).  
54  
55  
56  
57  
58  
59  
60

## **Educational strategies for patients and health-care providers**

Education is essential for effective diabetes control. It must be accomplished at, personal (patient empowerment), community (raise the awareness of the disease and its risk factors) and health care provider level (training of medical staff to diagnose, monitor and treat it correctly) to manage the rising burden of diabetes (43).

Due to complex challenges for DM patients and health care providers, educational campaigns are necessary to support health care providers and empower patients to manage their disease-associated decisions, lifestyle habits and medication use. Best benefits are proposed to be achieved by continuous individualized education, guided by patients' concerns, preferences and needs (12, 44).

Several studies on DM2 (45-57), DM1 (58) and GDM (36) investigated long-term interventions to support patient empowerment based on improved knowledge, motivation, and capacity to take control of their disease (12). Three studies trialed nurse-led (46, 52, 53, 59) and 2 studies investigated strategies to train healthcare providers in the management of patients with DM (60, 61). Improvement of patient empowerment improved adherence and glucose control, fewer admissions to healthcare facilities and lower costs. Only two studies reported on the quality of life with heterogeneous results (46, 59, 62).

Currently, the COVID-19 pandemic has forced all nations to implement alternative, oftentimes digital strategies including tele-monitoring and teleconsultation to continue care of NCDs (63). The application of telemedicine in DM management showed beneficial results (55, 64). Lifestyle focused messages might be an effective low-cost option to keep patients motivated to adhere to healthy lifestyles and further research seems advisable (65).

All included studies were adapted to local contexts and the trialed strategies hold the promise of adaptability to health care systems in other African and LMIC. Moreover, the tasks of nurses in NCD care could be reshaped and expanded in countries with comparably few physicians in order to improve DM diagnostics, treatment and education.

### **Strategies to increase physical activity**

As in the literature (GDM (66), DM1 (67, 68) and DM2 (69, 70)), exercise therapy generally showed positive effects (DM2 (27, 71-74), DM1 (75), GDM (76)) on glycemic control. Exemplarily, four weeks by setting the goal to accumulate 10,000 steps per day significantly reduced HbA1C levels (71). Due to limited follow up periods, it is advisable to target long-term adherence to these strategies in future research.

### **Pharmacological strategies**

Currently, the available research on pharmacological interventions for DM is sparse in Africa. We identified only six studies (3 on DM2 (77-79), 3 on GDM (80-82)) testing pharmacological interventions as a central part of DM care (83) despite known differences between African and European Americans (19). This might be attributable to our criteria excluding international studies with less than 50% of the sites in African countries (e.g. (84-89)). Many major multi centric pharmacological studies only have few study centers in Africa. Nevertheless, in-depth research into differing effectiveness of diabetic medications is still lacking.

reported the usability and safety of a basal-bolus insulin regime with stepwise intensification in an African setting The efficacy of basal-bolus insulin regimes, as an easy to handle, practical DM treatment option was successfully tested by Malek 2015 (79) and has been previously described in other settings (90, 91). Further research should consider regional contexts like availability of medication, practicability of the medication (e.g. insulin needs proper storage (92, 93)) lifestyle habits and genetic aspects (94, 95). Consideration of findings on African American cohorts seems advisable (96, 97).

### **Strategies on nutrition and food supplementations**

Nutritional and food supplementation interventions can successfully be used supporting pharmacological care or in early and pre-DM stages improving glycemic control, lipid profiles and management of DM-related complications (98-110). In this review, nutritional interventions (40, 111-113), including long-term consumption of honey (111), camel milk (112) and a low fat and protein content of meals (113) with positive effects on metabolic control. Camel milk, traditionally used for treatment of DM in arid areas of Africa and Asia, improves glycemic control, reduces insulin requirement and limits diabetic complications (114). Rashad 2017 (115) stated the beneficial effects of *balanites aegyptiaca* (desert date) extract on glycemic control. This evergreen tree is common in arid regions in Africa and was traditionally used in Egyptian traditional medicine (116).

Several food supplementations (zinc-gluconate (117) and zinc-chromium (118) supplementations, ginger powder (119), *Nigella sativa* oil capsules (120), L-carnitine (121), L-carnosine (122) as well as vitamin B, C or D supplementation (62, 123-125)) had positive effects on glycemic control.

### **Strategies on the treatment of DM related complications**

1  
2  
3 Three studies tested the role of periodontitis treatment in diabetic patients (126-128).  
4 Tsobgny-Tsague et al. (128) and El-Makaky et al. (126) described the importance of  
5 early treatment start, resulting in favorable patient outcomes in periodontal health and  
6 glucose control. El-Sharkawy et al. (127) found propolis to be a favorable addition to  
7 planing and scaling. In an Ethiopian cohort, only 21% of DM patients received oral  
8 health screening (129). The WHO regards oral health as a crucial component of health  
9 care with 12-14 % of 35 to 44-year-old Africans suffering from periodontitis (130).  
10  
11 Treatment options for diabetic wounds were tested in two studies (131, 132).  
12 Phototherapy in addition to usual care was first trialed in an African cohort of patients  
13 suffering from diabetic foot ulcers, showing beneficial wound healing outcomes. Similar  
14 results were described in other settings (133). The addition of propolis to usual care  
15 regimes showed improved wound healing. These findings are supported by studies  
16 from other settings (134, 135).  
17  
18  
19  
20  
21  
22  
23  
24  
25

### 26 **Strength and limitations**

27  
28 The external validity of this systematic review is limited by the focus on a limited  
29 number of countries and urban health care setting. The included studies were set in 15  
30 of the 54 African countries with a focus on the North African region, especially Egypt.  
31 Egypt is the country with the highest known prevalence of DM in the African continent  
32 (4, 7). This might be related to economic expansion and urbanization, but also due to  
33 specific dietary issues (e.g. white bread, polished rice, trans fats), reduced physical  
34 activity due to prohibition of exercise in public places, shortage of exercise facilities,  
35 poor physical education in schools. Poor diet and physical inactivity are causing a high  
36 rate of overweight and obesity among the Egyptian population (136).  
37  
38

39 Our pre-planned primary outcome was mortality which was not reported in any of the  
40 included studies. Since DM is a chronic disease with a slow progression and long-term  
41 development of organ damage, the survival time is higher than the follow-up time of  
42 most of the studies. The included studies looked at long-term treatment strategies  
43 rather than treatment for acute hypo- or hyperglycemic events that can lead to acutely  
44 fatal events. Nevertheless, long-term glucose control, being represented by the HbA1c  
45 value is one of the strongest clinical-outcome indicators of efficient DM management  
46 and health outcomes (137). It is easy to measure and serves as a representation of the  
47 individual's average blood glucose levels in the previous 3 months (137). Furthermore,  
48 it is up to discussion if improvement of glycemic control based on blood glucose  
49 measures like HbA1C are necessary the best strategic in LMIC or if diabetes  
50  
51  
52  
53  
54  
55  
56  
57  
58  
59  
60

1  
2  
3 complications are more effectively prevented by targeting bloodpressure or blood lipids  
4 (138).

5  
6 Next, this review does not include non-randomized study types including prospective  
7 cohort trials or qualitative research, probable not taking into account the evidence that  
8 has been accumulated. Nevertheless, our aim was to search for randomized trials,  
9 since these study types, if conducted well, have a high evidence quality, allowing to  
10 minimize biases. Moreover, many of the studies included had a high risk of bias.

11  
12 This systematic review includes studies as the highest level of evidence to investigate  
13 the benefits and harms of interventions (139). We included studies published in the  
14 English language without time restrictions. Language bias was shown to be unlikely.  
15 Despite the high linguistic diversity on the African continent, the languages mostly  
16 spoken are English, Arabic, and French (140). Eventually, we did not exclude any  
17 study due to the publication language, but we might have missed studies from journals  
18 that are not listened in searched databases.

## 25 26 27 **CONCLUSION**

28 This systematic review shows an increasing number of studies due to the rising  
29 prevalence and awareness of DM in African countries. However, the number of high-  
30 quality studies is still low and emphasizes knowledge gaps and underexplored  
31 research areas. Available studies are not representative of all African regions and were  
32 mainly conducted in urban areas of higher developed countries. Especially primary  
33 care settings and implementation research are underrepresented.

34  
35 An improvement of the prognosis of DM patients in Africa requires adequate technical  
36 and financial resources, training of healthcare staff and the implementation of  
37 comprehensive strategies to improve early diagnostics, adherence to medical  
38 treatment and subsequent regular checks. The identified studies offer a variety of  
39 effective approaches as a basis for local guidelines in the different fields of action in  
40 DM care adjusted to regional circumstances.

## 47 48 49 **Ethics approval**

50  
51 No ethical approval is necessary

## 52 53 54 **Authors contribution**

55  
56 Sandholzer-Yilmaz AS developed the concept of the review, performed the initial  
57 systematic search in the International Trials Registry, screened the references,  
58 extracted study data in 2019, wrote a draft of the manuscript and worked in the  
59  
60

1  
2  
3 coauthors comments on the final version of the manuscript and finally submitted the  
4 manuscript.  
5

6 Kroeber ES updated the systematic search, added a search in 2 regional databases,  
7  
8 screened the updated search results and extracted the updated data and wrote the  
9 final version of the manuscript.  
10

11 Unverzagt S has expertise in systematic reviews and is the guarantor of the  
12 methodological quality of the systematic review, developed the review concept has  
13 registered the protocol, performed the systematic search in 2 databases, screened all  
14 references, checked the initial as well as the updated data extraction and wrote the  
15 final version of this manuscript.  
16  
17

18 Ayele W provided expertise on the needs of evidence in the African context, developed  
19 the review concept, discussed the protocol and critically read and commented on the  
20 manuscript.  
21  
22

23 Frese T and provided expertise on primary care, developed the review concept,  
24 critically read and commented on the manuscript.  
25

26 Kantelhardt EJ provided expertise on the needs of evidence in the African context,  
27 developed the review concept, critically read and commented on the manuscript.  
28  
29

30  
31 Sandholzer-Yilmaz AS and Kroeber ES are joint first authors of this manuscript.  
32  
33

### 34 **Acknowledgements:**

35 Dawn Bielawski did the proofreading.  
36  
37  
38  
39

### 40 **Funding statement**

41 This research received no specific grant from any funding agency in the public,  
42 commercial or not-for-profit sectors.  
43  
44  
45

### 46 **Competing interests statement**

47 The authors declare no competing interests.  
48  
49  
50  
51  
52  
53  
54  
55  
56  
57  
58  
59  
60

## References

1. Kushitor MK, Boatemaa S. The double burden of disease and the challenge of health access: Evidence from Access, Bottlenecks, Cost and Equity facility survey in Ghana. *PLoS One*. 2018;13(3):e0194677.
2. Misganaw A, Mariam DH, Araya T. The double mortality burden among adults in Addis Ababa, Ethiopia, 2006-2009. *Preventing chronic disease*. 2012;9.
3. Roth GA, Abate D, Abate KH, Abay SM, Abbafati C, Abbasi N, et al. Global, regional, and national age-sex-specific mortality for 282 causes of death in 195 countries and territories, 1980–2017: a systematic analysis for the Global Burden of Disease Study 2017. *The Lancet*. 2018;392(10159):1736-88.
4. Federation ID. IDF Diabetes Atlas 9th edition <https://www.diabetesatlas.org/en/>: International Diabetes Federation; 2019 [
5. Beagley J, Guariguata L, Weil C, Motala AA. Global estimates of undiagnosed diabetes in adults. *Diabetes research and clinical practice*. 2014;103(2):150-60.
6. Asmelash D, Asmelash Y. The Burden of Undiagnosed Diabetes Mellitus in Adult African Population: A Systematic Review and Meta-Analysis. *Journal of Diabetes Research*. 2019;2019:4134937.
7. Bos M, Agyemang C. Prevalence and complications of diabetes mellitus in Northern Africa, a systematic review. *BMC public health*. 2013;13(1):387.
8. Awadalla H, Noor SK, Elmadhoun WM, Almobarak AO, Elmak NE, Abdelaziz SI, et al. Diabetes complications in Sudanese individuals with type 2 diabetes: overlooked problems in sub-Saharan Africa? *Diabetes & Metabolic Syndrome: Clinical Research & Reviews*. 2017;11:S1047-S51.
9. Mutyambizi C, Pavlova M, Chola L, Hongoro C, Groot W. Cost of diabetes mellitus in Africa: a systematic review of existing literature. *Globalization and health*. 2018;14(1):3.
10. Clark A, Jit M, Warren-Gash C, Guthrie B, Wang HH, Mercer SW, et al. Global, regional, and national estimates of the population at increased risk of severe COVID-19 due to underlying health conditions in 2020: a modelling study. *Lancet Glob Health*. 2020;8(8):e1003-e17.
11. Nations U. Sustainable development goals. Goal 3: Ensure healthy living and promote well-being for all at all ages 2019 [Assessed 29/09/2020]. Available from: <https://www.un.org/sustainabledevelopment/health/>.
12. Gómez-Velasco DV, Almeda-Valdes P, Martagón AJ, Galán-Ramírez GA, Aguilar-Salinas CA. Empowerment of patients with type 2 diabetes: current perspectives. *Diabetes, metabolic syndrome and obesity: targets and therapy*. 2019;12:1311.
13. Audain KA, Levy L, Ellahi B. Sugar sweetened beverage consumption in the early years and implications for type 2 diabetes: A sub-Saharan Africa context. *Proceedings of the Nutrition Society* 2019;78(4):547-53.
14. Cosentino F, Grant PJ, Aboyans V, Bailey CJ, Ceriello A, Delgado V, et al. 2019 ESC Guidelines on diabetes, pre-diabetes, and cardiovascular diseases developed in collaboration with the EASD: The Task Force for diabetes, pre-diabetes, and cardiovascular diseases of the European Society of Cardiology (ESC) and the European Association for the Study of Diabetes (EASD). *European heart journal*. 2020;41(2):255-323.
15. Organization WH. World Health Organization model list of essential medicines: 21st list 2019. World Health Organization; 2019.
16. Association AD. 2. Classification and Diagnosis of Diabetes: Standards of Medical Care in Diabetes-2020. *Diabetes Care*. 2020;43(Suppl 1):S14.
17. Roglic G. WHO Global report on diabetes: A summary. *International Journal of Noncommunicable Diseases*. 2016;1(1):3.

18. Checkley W, Ghannem H, Irazola V, Kimaiyo S, Levitt NS, Miranda JJ, et al. Management of NCD in low-and middle-income countries. *Global heart*. 2014;9(4):431-43.
19. Gomez F, Hirbo J, Tishkoff SA. Genetic variation and adaptation in Africa: implications for human evolution and disease. *Cold Spring Harbor perspectives in biology*. 2014;6(7):a008524.
20. Owolabi MO, Yaria JO, Daivadanam M, Makanjuola AI, Parker G, Oldenburg B, et al. Gaps in guidelines for the management of diabetes in low-and middle-income versus high-income countries—a systematic review. *Diabetes Care*. 2018;41(5):1097-105.
21. Moher D, Liberati A, Tetzlaff J, Altman DG, Group P. Preferred reporting items for systematic reviews and meta-analyses: the PRISMA statement. *PLoS med*. 2009;6(7):e1000097.
22. Higgins JPT, Green S. *Cochrane handbook for systematic reviews of interventions* version 5.1.0 [updated March 2011]. Collaboration TC, editor. Available from [www.handbook.cochrane.org](http://www.handbook.cochrane.org). 8.3.2020. 2011.
23. Moher D, Hopewell S, Schulz KF, Montori V, Gøtzsche PC, Devereaux P, et al. CONSORT 2010 explanation and elaboration: updated guidelines for reporting parallel group randomised trials. *International journal of surgery*. 2012;10(1):28-55.
24. Team TE. *EndNote*. EndNote X9 ed. Philadelphia, PA: Clarivate; 2013.
25. Higgins JPT, Eldridge S, Li Te. Chapter 23: Including variants on randomized trials. In: Higgins JPT, Thomas J, Chandler J, Cumpston M, Li T, Page MJ, et al., editors. *Cochrane Handbook for Systematic Reviews of Interventions* version 6.1 (updated September 2020). [www.training.cochrane.org/handbook](http://www.training.cochrane.org/handbook); Cochrane; 2020.
26. (RevMan) RM. Version 5.3. Copenhagen: The Nordic Cochrane Centre, The Cochrane Collaboration; 2014.
27. Asuako B, Moses MO, Eghan BA, Sarpong PA. Fasting plasma glucose and lipid profiles of diabetic patients improve with aerobic exercise training. *Ghana Medical Journal*. 2017;51(3):120-7.
28. Theobald S, Brandes N, Gyapong M, El-Saharty S, Proctor E, Diaz T, et al. Implementation research: new imperatives and opportunities in global health. *The Lancet*. 2018;392(10160):2214-28.
29. LLC M. Sub-Saharan Africa Rural Population 1960-2022 2022 [Available from: <https://www.macrotrends.net/countries/SSF/sub-saharan-africa-rural-population>].
30. Chiwanga FS, Njelekela MA, Diamond MB, Bajunirwe F, Guwatudde D, Nankya-Mutyoba J, et al. Urban and rural prevalence of diabetes and pre-diabetes and risk factors associated with diabetes in Tanzania and Uganda. *Glob Health Action*. 2016;9:31440.
31. Price AJ, Crampin AC, Amberbir A, Kayuni-Chihana N, Musicha C, Tafatatha T, et al. Prevalence of obesity, hypertension, and diabetes, and cascade of care in sub-Saharan Africa: a cross-sectional, population-based study in rural and urban Malawi. *The Lancet Diabetes & Endocrinology*. 2018;6(3):208-22.
32. Bank AD. The Africa Infrastructure Development Index (AIDI) 2018 2018 [Available from: <https://www.icafrica.org/en/knowledge-hub/article/the-africa-infrastructure-development-index-aidi-2018-358/>].
33. Hall V, Thomsen RW, Henriksen O, Lohse N. Diabetes in Sub Saharan Africa 1999-2011: epidemiology and public health implications. A systematic review. *BMC public health*. 2011;11(1):1-12.
34. Federation ID. IDF Diabetes Atlas. Africa [https://diabetesatlas.org/upload/resources/material/20191218\\_144539\\_afr\\_factsheet\\_en.pdf2019](https://diabetesatlas.org/upload/resources/material/20191218_144539_afr_factsheet_en.pdf2019) [
35. Federation ID. IDF Diabetes Atlas. Middle East and North Africa [https://www.diabetesatlas.org/upload/resources/material/20191218\\_144557\\_mena\\_factsheet\\_en.pdf2019](https://www.diabetesatlas.org/upload/resources/material/20191218_144557_mena_factsheet_en.pdf2019) [



- 1  
2  
3 36. Utz B, Assarag B, Smekens T, Ennassiri H, Lekhal T, El Ansari N, et al. Detection and initial management of gestational diabetes through primary health care services in Morocco: An effectiveness-implementation trial. *PloS one*. 2018;13(12):e0209322.
- 4  
5  
6  
7 37. Webb EM, Rheeder P. A cluster-randomized trial to estimate the effect of mobile screening and treatment feedback on HbA1c and diabetes-related complications in Tshwane primary health care clinics, South Africa. *Primary care diabetes*. 2017;11(6):546-54.
- 8  
9  
10  
11 38. Webb EM, Rheeder P, Roux P. Screening in Primary Care for Diabetic Retinopathy, Maculopathy and Visual Loss in South Africa. *Ophthalmologica*. 2016;235(3):141-9.
- 12  
13  
14  
15 39. Webb EM, Rheeder P, Van Zyl DG. Diabetes care and complications in primary care in the Tshwane district of South Africa. *Primary care diabetes*. 2015;9(2):147-54.
- 16  
17  
18 40. Krawinkel MB, Ludwig C, Swai ME, Yang RY, Chun KP, Habicht SD. Bitter gourd reduces elevated fasting plasma glucose levels in an intervention study among prediabetics in Tanzania. *Journal of Ethnopharmacology*. 2018;216:1-7.
- 19  
20  
21 41. RezkAllah SS, Takla MK. Effects of different dosages of interval training on glycemic control in people with prediabetes: a randomized controlled trial. *Diabetes spectrum*. 2019;32(2):125-31.
- 22  
23  
24 42. Mogueo A, Oga-Omenka C, Hatem M, Kuate Defo B. Effectiveness of interventions based on patient empowerment in the control of type 2 diabetes in sub-Saharan Africa: A review of randomized controlled trials. *Endocrinology, Diabetes & Metabolism*.e00174.
- 25  
26  
27 43. Atun R, Davies JI, Gale EA, Bärnighausen T, Beran D, Kengne AP, et al. Diabetes in sub-Saharan Africa: from clinical care to health policy. *The lancet Diabetes & endocrinology*. 2017;5(8):622-67.
- 28  
29  
30 44. Beck J, Greenwood DA, Blanton L, Bollinger ST, Butcher MK, Condon JE, et al. 2017 National Standards for Diabetes Self-Management Education and Support. *Diabetes Educ*. 2018;44(1):35-50.
- 31  
32  
33 45. Abaza H, Marschollek M, Schulze M. SMS Education for the Promotion of Diabetes Self-Management in Low & Middle Income Countries: A Randomized Controlled Trial in Egypt. *Studies in Health Technology & Informatics*. 2017;245:1209.
- 34  
35  
36 46. Adibe MO, Ukwe CV, Aguwa CN. The Impact of Pharmaceutical Care Intervention on the Quality of Life of Nigerian Patients Receiving Treatment for Type 2 Diabetes. *Value in Health Regional Issues*. 2013;2(2):240-7.
- 37  
38  
39 47. Adjei DN, Agyemang C, Dasah JB, Kuranchie P, Amoah AG. The effect of electronic reminders on risk management among diabetic patients in low resourced settings. *Journal of Diabetes & its Complications*. 2015;29(6):818-21.
- 40  
41  
42 48. Amendezo E, Walker Timothy D, Karamuka V, Robinson B, Kavabushi P, Ntirenganya C, et al. Effects of a lifestyle education program on glycemic control among patients with diabetes at Kigali University Hospital, Rwanda: A randomized controlled trial. *Diabetes Research & Clinical Practice*. 2017;126:129-37.
- 43  
44  
45 49. Chraibi A, Al-Herz S, Nguyen BD, Soeatmadji DW, Shinde A, Lakshminenkataraman B, et al. An RCT Investigating Patient-Driven Versus Physician-Driven Titration of BIAsp 30 in Patients with Type 2 Diabetes Uncontrolled Using NPH Insulin.[Erratum appears in *Diabetes Ther*. 2017 Jun 20;;; PMID: 28634880]. *Diabetes Therapy Research, Treatment and Education of Diabetes and Related Disorders*. 2017;8(4):767-80.
- 46  
47  
48 50. Debussche X, Besancon S, Balcou-Debussche M, Ferdynus C, Delisle H, Huiart L, et al. Structured peer-led diabetes self-management and support in a low-income country: The ST2EP randomised controlled trial in Mali. *PLoS ONE [Electronic Resource]*. 2018;13(1):e0191262.
- 49  
50  
51 51. Essien O, Otu A, Umoh V, Enang O, Hicks JP, Walley J. Intensive Patient Education Improves Glycaemic Control in Diabetes Compared to Conventional
- 52  
53  
54  
55  
56  
57  
58  
59  
60

- 1  
2  
3 Education: A Randomised Controlled Trial in a Nigerian Tertiary Care Hospital. *PLoS ONE* 2017;12(1):e0168835.
- 4  
5 52. Hailu FB, Hjortdahl P, Moen A. Nurse-Led Diabetes Self-Management  
6 Education Improves Clinical Parameters in Ethiopia. *Frontiers in Public Health*.  
7 2018;6:302.
- 8  
9 53. Labhardt ND, Balo JR, Ndam M, Manga E, Stoll B. Improved retention rates  
10 with low-cost interventions in hypertension and diabetes management in a rural African  
11 environment of nurse-led care: a cluster-randomised trial. *Tropical Medicine &*  
12 *International Health*. 2011;16(10):1276-84.
- 13  
14 54. Mash RJ, Rhode H, Zwarenstein M, Rollnick S, Lombard C, Steyn K, et al.  
15 Effectiveness of a group diabetes education programme in under-served communities  
16 in South Africa: a pragmatic cluster randomized controlled trial. *Diabetic Medicine*.  
17 2014;31(8):987-93.
- 18  
19 55. Takenga C, Berndt RD, Musongya O, Kitero J, Katoke R, Molo K, et al. An ICT-  
20 Based Diabetes Management System Tested for Health Care Delivery in the African  
21 Context. *International Journal of Telemedicine & Applications*. 2014;2014:437307.
- 22  
23 56. Tawfik MY, Mohamed RA. The impact of communicating cardiovascular risk in  
24 type 2 diabetics on patient risk perception, diabetes self-care, glycosylated hemoglobin,  
25 and cardiovascular risk. *Journal of public health (germany)*. 2016;24(2):153-64.
- 26  
27 57. Thuita AW, Kiage BN, Onyango AN, Makokha AO. Effect of a nutrition  
28 education programme on the metabolic syndrome in type 2 diabetes mellitus patients  
29 at a level 5 Hospital in Kenya: "a randomized controlled trial". *BMC Nutr*. 2020;6:30.
- 30  
31 58. Malipa M, Menon J. The relationship between compliance and quality of life  
32 among adolescents with diabetes mellitus type1. *Medical Journal of Zambia*.  
33 2013;40(3):93-103.
- 34  
35 59. Adibe MO, Aguwa CN, Ukwe CV. Cost-Utility Analysis of Pharmaceutical Care  
36 Intervention Versus Usual Care in Management of Nigerian Patients with Type 2  
37 Diabetes. *Value in Health Regional Issues*. 2013;2(2):189-98.
- 38  
39 60. Fairall LR, Folb N, Timmerman V, Lombard C, Steyn K, Bachmann MO, et al.  
40 Educational Outreach with an Integrated Clinical Tool for Nurse-Led Non-  
41 communicable Chronic Disease Management in Primary Care in South Africa: a  
42 Pragmatic Cluster Randomised Controlled Trial. *Plos medicine*. 2016;13(11):e1002178.
- 43  
44 61. Steyn K, Lombard C, Gwebushe N, Fourie JM, Everett-Murphy K, Zwarenstein  
45 M, et al. Implementation of national guidelines, incorporated within structured diabetes  
46 and hypertension records at primary level care in Cape Town, South Africa: a  
47 randomised controlled trial. *Glob Health Action*. 2013;6:20796.
- 48  
49 62. Ragheb SR, El Wakeel LM, Nasr MS, Sabri NA. Impact of Rutin and Vitamin C  
50 combination on oxidative stress and glycaemic control in patients with type 2 diabetes.  
51 *Clinical nutrition ESPEN*. 2020;35:128-35.
- 52  
53 63. Advisor E. Telemedicine for Diabetes Management During the COVID-19  
54 Pandemic and Beyond Telemedicine for Diabetes Management During the COVID-19  
55 Pandemic and Beyond - *Endocrinology Advisor*.2020 [
- 56  
57 64. Tchero H, Kangambega P, Briatte C, Brunet-Houdard S, Retali G-R, Rusch E.  
58 Clinical effectiveness of telemedicine in diabetes mellitus: a meta-analysis of 42  
59 randomized controlled trials. *Telemedicine and e-Health*. 2019;25(7):569-83.
- 60  
61 65. Haider R, Sudini L, Chow CK, Cheung NW. Mobile phone text messaging in  
62 improving glycaemic control for patients with type 2 diabetes mellitus: A systematic  
63 review and meta-analysis. *Diabetes research and clinical practice*. 2019;150:27-37.
- 64  
65 66. Russo LM, Nobles C, Ertel KA, Chasan-Taber L, Whitcomb BW. Physical  
66 activity interventions in pregnancy and risk of gestational diabetes mellitus: a  
67 systematic review and meta-analysis. *Obstetrics & Gynecology*. 2015;125(3):576-82.
- 68  
69 67. Quirk H, Blake H, Tennyson R, Randell T, Glazebrook C. Physical activity  
70 interventions in children and young people with type 1 diabetes mellitus: a systematic  
71 review with meta-analysis. *Diabetic Medicine*. 2014;31(10):1163-73.

- 1
- 2
- 3 68. Aljawarneh YM, Wardell DW, Wood GL, Rozmus CL. A systematic review of
- 4 physical activity and exercise on physiological and biochemical outcomes in children
- 5 and adolescents with type 1 diabetes. *Journal of Nursing Scholarship*. 2019;51(3):337-
- 6 45.
- 7 69. Pan B, Ge L, Xun Y-q, Chen Y-j, Gao C-y, Han X, et al. Exercise training
- 8 modalities in patients with type 2 diabetes mellitus: a systematic review and network
- 9 meta-analysis. *International Journal of Behavioral Nutrition and Physical Activity*.
- 10 2018;15(1):72.
- 11 70. Smith AD, Crippa A, Woodcock J, Brage S. Physical activity and incident type 2
- 12 diabetes mellitus: a systematic review and dose-response meta-analysis of
- 13 prospective cohort studies. Springer; 2016.
- 14 71. Fayehun AF, Olowookere OO, Ogunbode AM, Adetunji AA, Esan A. Walking
- 15 prescription of 10 000 steps per day in patients with type 2 diabetes mellitus: a
- 16 randomised trial in Nigerian general practice. *British Journal of General Practice*.
- 17 2018;68(667):e139-e45.
- 18 72. Maharaj SS, Nuhu JM. Rebound exercise: A beneficial adjuvant for sedentary
- 19 non-insulin-dependent type 2 diabetic individuals in a rural environment. *Australian*
- 20 *Journal of Rural Health*. 2016;24(2):123-9.
- 21 73. van Rooijen AJ, Rheeder P, Eales CJ, Becker PJ. Effect of exercise versus
- 22 relaxation on haemoglobin A1C in Black females with type 2 diabetes mellitus. *Qjm*.
- 23 2004;97(6):343-51.
- 24 74. Yan H, Prista A, Ranadive SM, Damasceno A, Caupers P, Kanaley JA, et al.
- 25 Effect of Aerobic Training on Glucose Control and Blood Pressure in T2DDM East
- 26 African Males. *Isrn Endocrinology Print*. 2014;2014:864897.
- 27 75. Salem MA, Aboelasar MA, Elbarbary NS, Elhilaly RA, Refaat YM. Is exercise a
- 28 therapeutic tool for improvement of cardiovascular risk factors in adolescents with type
- 29 1 diabetes mellitus? A randomised controlled trial. *Diabetology & metabolic syndrome*.
- 30 2010;2(1):47.
- 31 76. Embaby H, Elsayed E, Fawzy M. Insulin Sensitivity and Plasma Glucose
- 32 Response to Aerobic Exercise in Pregnant Women at Risk for Gestational Diabetes
- 33 Mellitus. *Ethiopian journal of health sciences*. 2016;26(5):409-14.
- 34 77. Distiller LA, Nortje H, Wellmann H, Amod A, Lombard L. A 24-week,
- 35 prospective, randomized, open-label, treat-to-target pilot study of obese type 2
- 36 diabetes patients with severe insulin resistance to assess the addition of exenatide on
- 37 the efficacy of U-500 regular insulin plus metformin. *Endocrine practice*.
- 38 2014;20(11):1143-50.
- 39 78. El-Haggag SM, Farrag WF, Kotkata FA. Effect of ketotifen in obese patients with
- 40 type 2 diabetes mellitus. *Journal of Diabetes & its Complications*. 2015;29(3):427-32.
- 41 79. Malek R, Ajili F, Assaad-Khalil SH, Shinde A, Chen JW, Van den Berg E.
- 42 Similar glucose control with basal-bolus regimen of insulin detemir plus insulin aspart
- 43 and thrice-daily biphasic insulin aspart 30 in insulin-naive patients with type 2 diabetes:
- 44 Results of a 50-week randomized clinical trial of stepwise insulin intensification.
- 45 *Diabetes & Metabolism*. 2015;41(3):223-30.
- 46 80. Ashoush S, El-Said M, Fathi H, Abdelnaby M. Identification of metformin poor
- 47 responders, requiring supplemental insulin, during randomization of metformin versus
- 48 insulin for the control of gestational diabetes mellitus. *Journal of obstetrics and*
- 49 *gynaecology research*. 2016;42(6):640-7.
- 50 81. Beyuo T, Obed SA, Adjepong-Yamoah KK, Bugyei KA, Oppong SA, Marfoh K.
- 51 Metformin versus Insulin in the Management of Pre-Gestational Diabetes Mellitus in
- 52 Pregnancy and Gestational Diabetes Mellitus at the Korle Bu Teaching Hospital: A
- 53 Randomized Clinical Trial. *PLoS ONE [Electronic Resource]*. 2015;10(5):e0125712.
- 54 82. Ibrahim MI, Hamdy A, Shafik A, Taha S, Anwar M, Faris M. The role of adding
- 55 metformin in insulin-resistant diabetic pregnant women: a randomized controlled trial.
- 56 *Archives of Gynecology & Obstetrics*. 2014;289(5):959-65.
- 57
- 58
- 59
- 60

- 1  
2  
3 83. Cosentino F, Grant PJ, Aboyans V, Bailey CJ, Ceriello A, Delgado V, et al. 2019  
4 ESC Guidelines on diabetes, pre-diabetes, and cardiovascular diseases developed in  
5 collaboration with the EASD. *Eur Heart J*. 2020;41(2):255-323.
- 6 84. Bailey CJ, Iqbal N, T'Joene C, List JF. Dapagliflozin monotherapy in drug-naive  
7 patients with diabetes: a randomized-controlled trial of low-dose range. *Diabetes,*  
8 *Obesity & Metabolism*. 2012;14(10):951-9.
- 9 85. Chou HS, Truitt KE, Moberly JB, Merante D, Choi Y, Mun Y, et al. A 26-week,  
10 placebo- and pioglitazone-controlled monotherapy study of rivoglitazone in subjects  
11 with type 2 diabetes mellitus. *Diabetes, Obesity & Metabolism*. 2012;14(11):1000-9.
- 12 86. De Caterina R, Andersson U, Alexander JH, Al-Khatib SM, Bahit MC, Goto S, et  
13 al. History of bleeding and outcomes with apixaban versus warfarin in patients with  
14 atrial fibrillation in the Apixaban for Reduction in Stroke and Other Thromboembolic  
15 Events in Atrial Fibrillation trial. *American Heart Journal*. 2016;175:175-83.
- 16 87. Kadiri A, Al-Nakhi A, El-Ghazali S, Jabbar A, Al Arouj M, Akram J, et al.  
17 Treatment of type 1 diabetes with insulin lispro during Ramadan. *Diabetes &*  
18 *metabolism*. 2001;27(4 Pt 1):482-6.
- 19 88. Schumm-Draeger PM, Burgess L, Koranyi L, Hrubá V, Hamer-Maansson JE, de  
20 Bruin TW. Twice-daily dapagliflozin co-administered with metformin in type 2 diabetes:  
21 a 16-week randomized, placebo-controlled clinical trial. *Diabetes, Obesity &*  
22 *Metabolism*. 2015;17(1):42-51.
- 23 89. Van Olmen J, Van Pelt M, Malombo B, Ku GM, Kanda D, Heang H, et al.  
24 Process evaluation of a mobile health intervention for people with diabetes in low  
25 income countries - the implementation of the TEXT4DSM study. *Journal of*  
26 *Telemedicine & Telecare*. 2017;23(1):96-105.
- 27 90. Wang C, Mamza J, Idris I. Biphasic vs basal bolus insulin regimen in type 2  
28 diabetes: a systematic review and meta-analysis of randomized controlled trials.  
29 *Diabetic Medicine*. 2015;32(5):585-94.
- 30 91. Meece J. Basal insulin intensification in patients with type 2 diabetes: a review.  
31 *Diabetes Therapy*. 2018;9(3):877-90.
- 32 92. Heinemann L, Braune K, Carter A, Zayani A, Krämer LA. Insulin storage: a  
33 critical reappraisal. *Journal of Diabetes Science and Technology*.  
34 2020:1932296819900258.
- 35 93. Bahendeka S, Kaushik R, Swai AB, Otieno F, Bajaj S, Kalra S, et al. EADSG  
36 guidelines: insulin storage and optimisation of injection technique in diabetes  
37 management. *Diabetes Therapy*. 2019;10(2):341-66.
- 38 94. Asamoah EA, Obirikorang C, Acheampong E, Annani-Akollor ME, Laing EF,  
39 Owiredu E-W, et al. Heritability and Genetics of Type 2 Diabetes Mellitus in Sub-  
40 Saharan Africa: A Systematic Review and Meta-Analysis. *Journal of diabetes research*.  
41 2020;2020.
- 42 95. Onengut-Gumuscu S, Chen WM, Robertson CC, Bonnie JK, Farber E, Zhu Z, et  
43 al. Type 1 Diabetes Risk in African-Ancestry Participants and Utility of an Ancestry-  
44 Specific Genetic Risk Score. *Diabetes Care*. 2019;42(3):406-15.
- 45 96. Cheng C-Y, Reich D, Haiman CA, Tandon A, Patterson N, Elizabeth S, et al.  
46 African ancestry and its correlation to type 2 diabetes in African Americans: a genetic  
47 admixture analysis in three US population cohorts. *PLoS one*. 2012;7(3):e32840.
- 48 97. Ng MC, Shriner D, Chen BH, Li J, Chen W-M, Guo X, et al. Meta-analysis of  
49 genome-wide association studies in African Americans provides insights into the  
50 genetic architecture of type 2 diabetes. *PLoS Genet*. 2014;10(8):e1004517.
- 51 98. Jayawardena R, Ranasinghe P, Galappatthy P, Malkanthi R, Constantine G,  
52 Katulanda P. Effects of zinc supplementation on diabetes mellitus: a systematic review  
53 and meta-analysis. *Diabetology & metabolic syndrome*. 2012;4(1):13.
- 54 99. Wang X, Wu W, Zheng W, Fang X, Chen L, Rink L, et al. Zinc supplementation  
55 improves glycemic control for diabetes prevention and management: a systematic  
56 review and meta-analysis of randomized controlled trials. *The American Journal of*  
57 *Clinical Nutrition*. 2019;110(1):76-90.
- 58  
59  
60

- 1  
2  
3 100. Daily JW, Yang M, Kim DS, Park S. Efficacy of ginger for treating Type 2  
4 diabetes: A systematic review and meta-analysis of randomized clinical trials. *Journal*  
5 *of Ethnic Foods*. 2015;2(1):36-43.
- 6 101. Zhu J, Chen H, Song Z, Wang X, Sun Z. Effects of ginger (*Zingiber officinale*  
7 Roscoe) on type 2 diabetes mellitus and components of the metabolic syndrome: A  
8 systematic review and meta-analysis of randomized controlled trials. *Evidence-based*  
9 *complementary and alternative medicine*. 2018;2018.
- 10 102. Daryabeygi-Khotbehsara R, Golzarand M, Ghaffari MP, Djafarian K. *Nigella*  
11 *sativa* improves glucose homeostasis and serum lipids in type 2 diabetes: A systematic  
12 review and meta-analysis. *Complementary therapies in medicine*. 2017;35:6-13.
- 13 103. Heshmati J, Namazi N. Effects of black seed (*Nigella sativa*) on metabolic  
14 parameters in diabetes mellitus: A systematic review. *Complementary therapies in*  
15 *medicine*. 2015;23(2):275-82.
- 16 104. Vidal-Casariiego A, Burgos-Peláez R, Martínez-Faedo C, Calvo-Gracia F,  
17 Valero-Zanuy M, Luengo-Pérez L, et al. Metabolic effects of L-carnitine on type 2  
18 diabetes mellitus: systematic review and meta-analysis. *Experimental and clinical*  
19 *endocrinology & diabetes*. 2013;121(04):234-8.
- 20 105. Xu Y, Jiang W, Chen G, Zhu W, Ding W, Ge Z, et al. L-carnitine treatment of  
21 insulin resistance: A systematic review and meta-analysis. *Advances in Clinical and*  
22 *Experimental Medicine*. 2017;26(2):333-8.
- 23 106. Das UN. Vitamin C for Type 2 Diabetes Mellitus and Hypertension. *Archives of*  
24 *medical research*. 2019;50(2):11-4.
- 25 107. Afkhami-Ardekani M, Shojaoddiny-Ardekani A. Effect of vitamin C on blood  
26 glucose, serum lipids & serum insulin in type 2 diabetes patients. *Indian Journal of*  
27 *medical research*. 2007;126(5):471.
- 28 108. Maritim A, Sanders a, Watkins lii J. Diabetes, oxidative stress, and antioxidants:  
29 a review. *Journal of biochemical and molecular toxicology*. 2003;17(1):24-38.
- 30 109. Zhou C, Na L, Shan R, Cheng Y, Li Y, Wu X, et al. Dietary vitamin C intake  
31 reduces the risk of type 2 diabetes in Chinese adults: HOMA-IR and T-AOC as  
32 potential mediators. *Plos one*. 2016;11(9):e0163571.
- 33 110. Hosseinzadeh H, Nassiri-Asl M. Review of the protective effects of rutin on the  
34 metabolic function as an important dietary flavonoid. *Journal of endocrinological*  
35 *investigation*. 2014;37(9):783-8.
- 36 111. Abdulrhman MM, El-Hefnawy MH, Aly RH, Shatla RH, Mamdouh RM,  
37 Mahmoud DM, et al. Metabolic effects of honey in type 1 diabetes mellitus: a  
38 randomized crossover pilot study. *Journal of Medicinal Food*. 2013;16(1):66-72.
- 39 112. Mohamad RH, Zekry ZK, Al-Mehdar HA, Salama O, El-Shaieb SE, El-Basmy  
40 AA, et al. Camel milk as an adjuvant therapy for the treatment of type 1 diabetes:  
41 verification of a traditional ethnomedical practice. *Journal of Medicinal Food*.  
42 2009;12(2):461-5.
- 43 113. van der Hoogt M, van Dyk JC, Dolman RC, Pieters M. Protein and fat meal  
44 content increase insulin requirement in children with type 1 diabetes - Role of duration  
45 of diabetes. *Journal of clinical and translational endocrinology*. 2017;10:15-21.
- 46 114. Shori AB. Camel milk as a potential therapy for controlling diabetes and its  
47 complications: A review of in vivo studies. *Journal of food and drug analysis*.  
48 2015;23(4):609-18.
- 49 115. Rashad H, Metwally FM, Ezzat SM, Salama MM, Hasheesh A, Abdel Motaal A.  
50 Randomized double-blinded pilot clinical study of the antidiabetic activity of *Balanites*  
51 *aegyptiaca* and UPLC-ESI-MS/MS identification of its metabolites. *Pharmaceutical*  
52 *Biology*. 2017;55(1):1954-61.
- 53 116. Helal EG, El-Wahab A, Samia M, El Refaey H, Mohammad AA. Antidiabetic and  
54 antihyperlipidemic effect of *Balanites aegyptiaca* seeds (aqueous extract) on diabetic  
55 rats. *The Egyptian Journal of Hospital Medicine*. 2013;52(1):725-39.
- 56 117. Matter RM, Elbarbary NS, Ismail EAR, Darwish YW, Nada AS, Banoub VP. Zinc  
57 supplementation improves glucose homeostasis in patients with  $\beta^2$ -thalassemia major  
58  
59  
60

1  
2  
3 complicated with diabetes mellitus: a randomized controlled trial. *Nutrition* (Burbank, Los Angeles County, Calif). 2020;73.

4 118. Anderson RA, Roussel AM, Zouari N, Mahjoub S, Matheau JM, Kerkeni A. Potential antioxidant effects of zinc and chromium supplementation in people with type  
5 2 diabetes mellitus. *Journal of the American College of Nutrition*. 2001;20(3):212-8.

6 119. El Gayar MH, Aboromia MMM, Ibrahim NA, Abdel Hafiz MH. Effects of ginger  
7 powder supplementation on glycemic status and lipid profile in newly diagnosed obese  
8 patients with type 2 diabetes mellitus. *Obesity medicine*. 2019;14.

9 120. Moustafa HAM, El Wakeel LM, Halawa MR, Sabri NA, El-Bahy AZ, Singab AN. Effect of Nigella Sativa oil versus metformin on glycemic control and biochemical  
10 parameters of newly diagnosed type 2 diabetes mellitus patients. *Endocrine*.  
11 2019;65(2):286-94.

12 121. El-Sheikh HM, El-Haggag SM, Elbedewy TA. Comparative study to evaluate the  
13 effect of L-carnitine plus glimepiride versus glimepiride alone on insulin resistance in  
14 type 2 diabetic patients. *Diabetes and metabolic syndrome: clinical research and  
15 reviews*. 2019;13(1):167-73.

16 122. Elbarbary NS, Ismail EAR, El-Naggag AR, Hamouda MH, El-Hamamsy M. The  
17 effect of 12 weeks carnosine supplementation on renal functional integrity and  
18 oxidative stress in pediatric patients with diabetic nephropathy: a randomized placebo-  
19 controlled trial. *Pediatric diabetes*. 2018;19(3):470-7.

20 123. Ali S, Ghanem Y, Sharaki O, Hewedy W, al. e. The impact of different regimens  
21 of vitamin d3 on glucose homeostasis in type 2 diabetic patients. *Asian journal of  
22 pharmaceutical and clinical research*. 2019;12(12):21-6.

23 124. Elbarbary NS, Ismail EAR, Zaki MA, Darwish YW, Ibrahim MZ, El-Hamamsy M. Vitamin B complex supplementation as a homocysteine-lowering therapy for early  
24 stage diabetic nephropathy in pediatric patients with type 1 diabetes: A randomized  
25 controlled trial. *Clinical Nutrition*. 2020;39(1):49-56.

26 125. Anyanwu AC, Fasanmade OA, Odeniyi IA, Iwuala S, Coker HB, Ohwovoriole  
27 AE. Effect of Vitamin D supplementation on glycemic control in Type 2 diabetes  
28 subjects in Lagos, Nigeria. *Indian Journal of Endocrinology and Metabolism*.  
29 2016;20(2):189-94.

30 126. El-Makaky Y, Shalaby HK. The effects of non-surgical periodontal therapy on  
31 glycemic control in diabetic patients: a randomized controlled trial. *Oral diseases*.  
32 2020;26:822-9.

33 127. El-Sharkawy HM, Anees MM, Van Dyke TE. Propolis improves periodontal  
34 status and glycemic control in patients with type 2 diabetes mellitus and chronic  
35 periodontitis: a randomized clinical trial. *Journal of periodontology*. 2016;87(12):1418-  
36 26.

37 128. Tsobgny-Tsague NF, Lontchi-Yimagou E, Nana ARN, Tankeu AT, Katte JC,  
38 Dehayem MY, et al. Effects of nonsurgical periodontal treatment on glycated  
39 haemoglobin on type 2 diabetes patients (PARODIA 1 study): a randomized controlled  
40 trial in a sub-Saharan Africa population. *BMC Oral Health*. 2018;18(1):28.

41 129. Sahile AT, Mgutshini T, Ayehu SM. Oral Health Screening Status of Diabetes  
42 Patients in Selected Hospitals of Addis Ababa, Ethiopia, 2018. *Patient Related  
43 Outcome Measures*. 2020;11:173.

44 130. Organization WH. Promoting Oral Health in Africa: Prevention and control of  
45 oral diseases and noma as part of essential noncommunicable disease interventions.  
46 2016.

47 131. Nteleki B, Abrahamse H, Hourel NN. Conventional podiatric intervention and  
48 phototherapy in the treatment of diabetic ulcers. *Seminars in Vascular Surgery*.  
49 2015;28(3-4):172-83.

50 132. Yakoot M, Abdelatif M, Helmy S. Efficacy of a new local limb salvage treatment  
51 for limb-threatening diabetic foot wounds-a randomized controlled study. *Diabetes,  
52 Metabolic Syndrome and Obesity: Targets and Therapy*. 2019;12:1659.

- 1  
2  
3 133. Wang HT, Yuan JQ, Zhang B, Dong ML, Mao C, Hu D. Phototherapy for  
4 treating foot ulcers in people with diabetes. Cochrane Database of Systematic  
5 Reviews. 2017(6).  
6 134. Henshaw FR, Bolton T, Nube V, Hood A, Veldhoen D, Pfrunder L, et al. Topical  
7 application of the bee hive protectant propolis is well tolerated and improves human  
8 diabetic foot ulcer healing in a prospective feasibility study. Journal of Diabetes and its  
9 Complications. 2014;28(6):850-7.  
10 135. Afkhamizadeh M, Aboutorabi R, Ravari H, Fathi Najafi M, Ataei Azimi S,  
11 Javadian Langaroodi A, et al. Topical propolis improves wound healing in patients with  
12 diabetic foot ulcer: a randomized controlled trial. Natural product research.  
13 2018;32(17):2096-9.  
14 136. Hegazi R, El-Gamal M, Abdel-Hady N, Hamdy O. Epidemiology of and risk  
15 factors for type 2 diabetes in Egypt. Ann Glob Health. 2015;81(6):814-20.  
16 137. Sherwani SI, Khan HA, Ekhzaimy A, Masood A, Sakharkar MK. Significance of  
17 HbA1c test in diagnosis and prognosis of diabetic patients. Biomarker insights.  
18 2016;11:BMJ. S38440.  
19 138. Basu S, Flood D, Geldsetzer P, Theilmann M, Marcus ME, Ebert C, et al.  
20 Estimated effect of increased diagnosis, treatment, and control of diabetes and its  
21 associated cardiovascular risk factors among low-income and middle-income countries:  
22 a microsimulation model. Lancet Glob Health. 2021;9(11):e1539-e52.  
23 139. Medicine OCfE-B. "The Oxford 2011 Levels of Evidence".  
24 <https://www.cebm.net/wp-content/uploads/2014/06/CEBM-Levels-of-Evidence-2.1.pdf>;  
25 2011 [  
26 140. Maho JF. How many languages are there in Africa, really? TRENDS IN  
27 LINGUISTICS STUDIES AND MONOGRAPHS. 2004;156:279-96.  
28  
29  
30  
31  
32  
33  
34  
35  
36  
37  
38  
39  
40  
41  
42  
43  
44  
45  
46  
47  
48  
49  
50  
51  
52  
53  
54  
55  
56  
57  
58  
59  
60

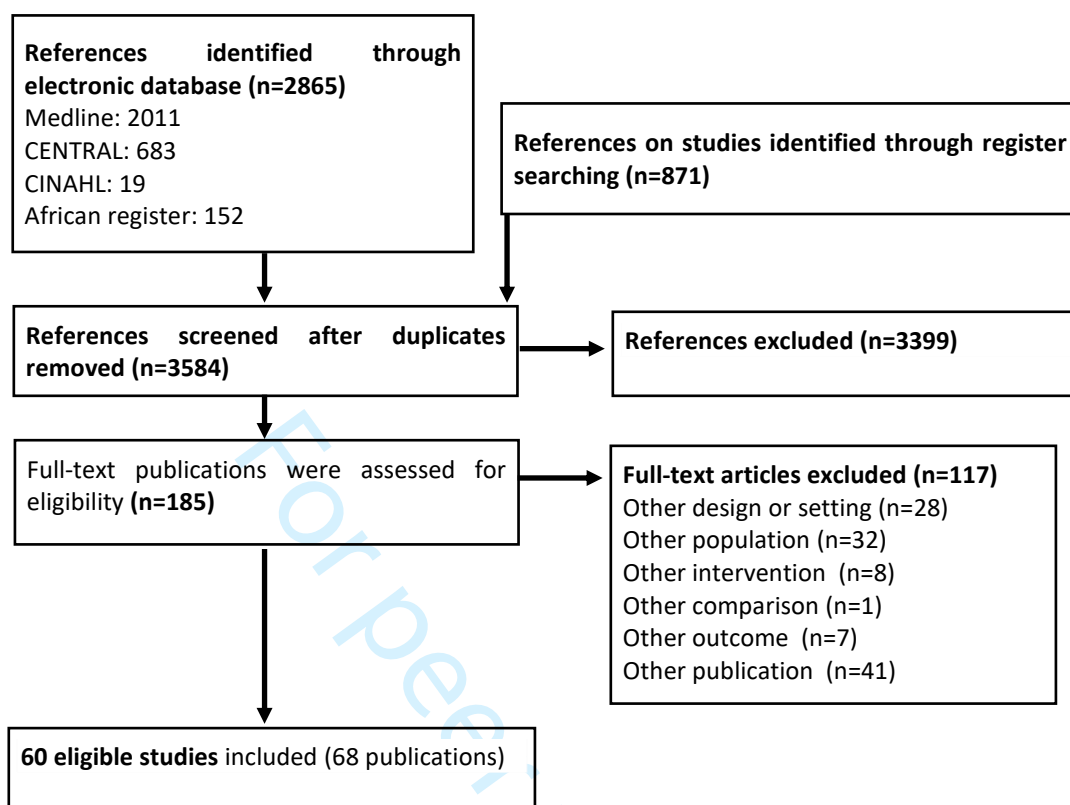



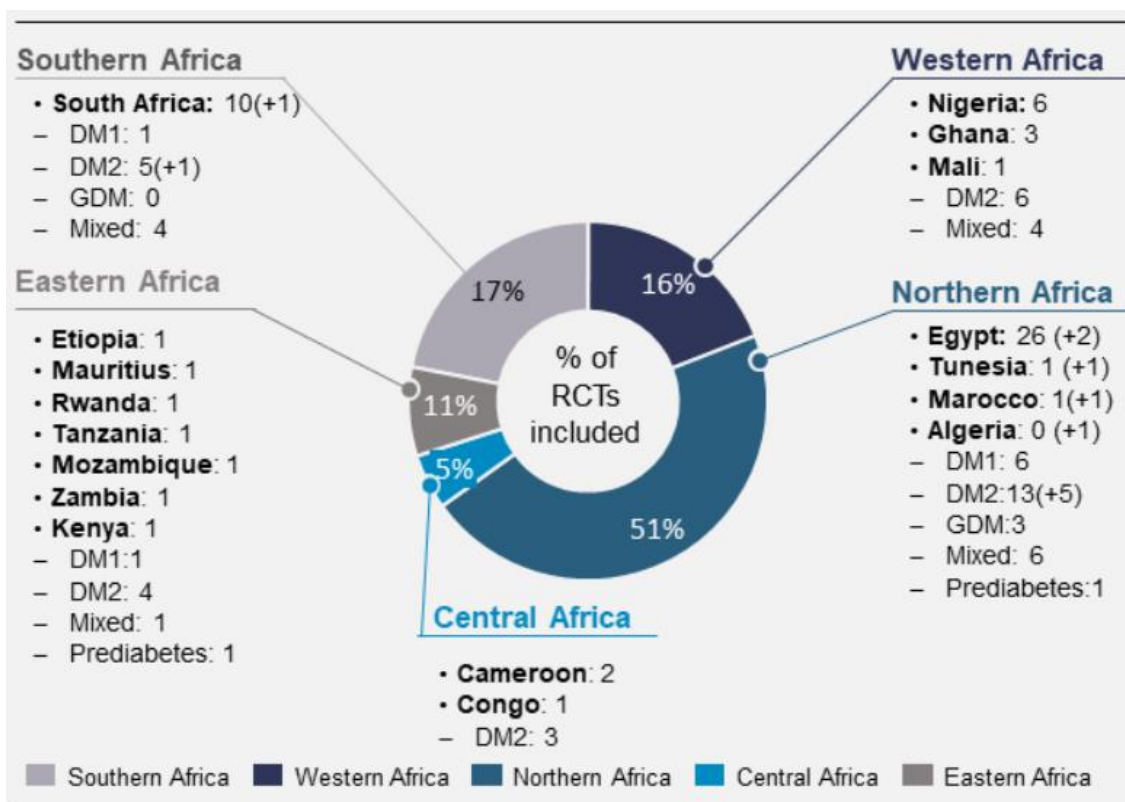

review only

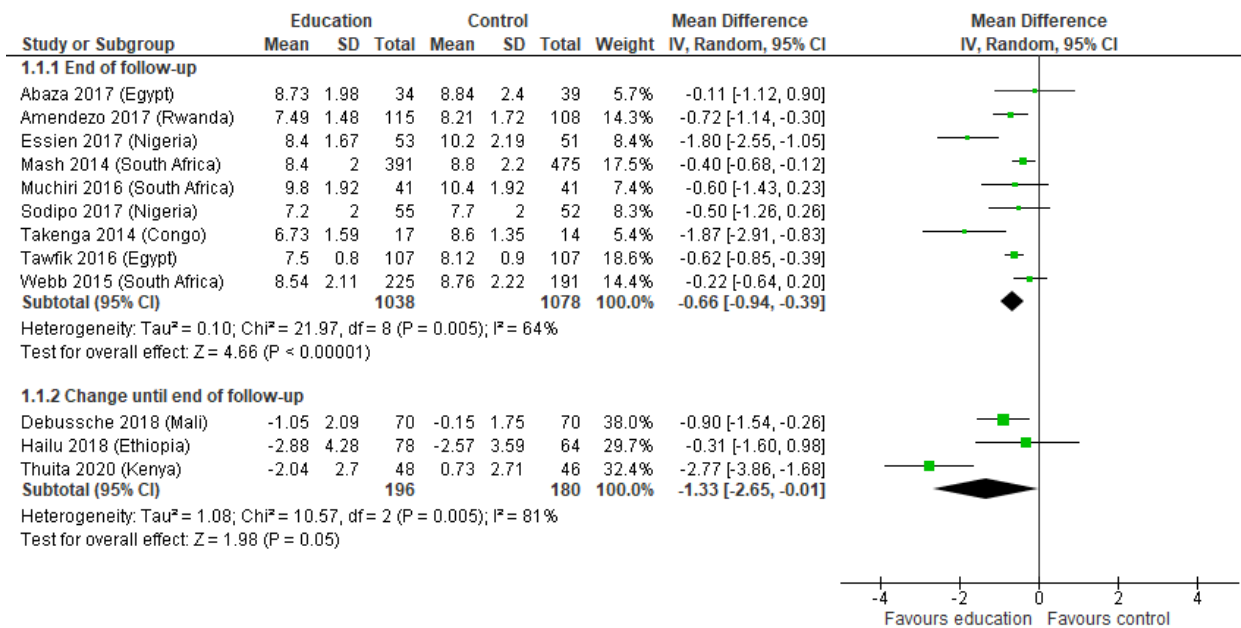

peer review only

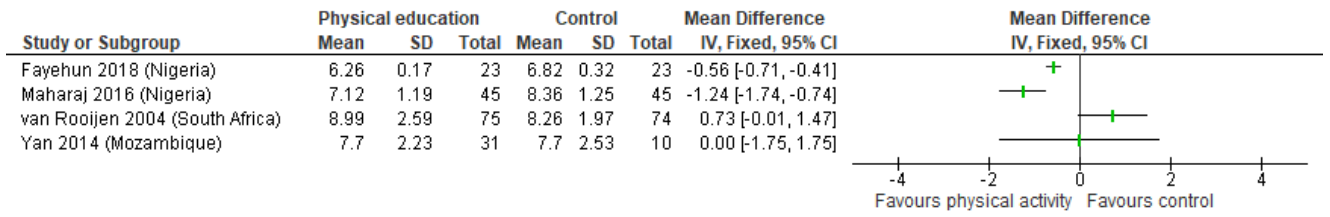

For peer review only

1  
2  
3  
4  
5  
6  
7  
8  
9  
10  
11  
12  
13  
14  
15  
16  
17  
18  
19  
20  
21  
22  
23  
24  
25  
26  
27  
28  
29  
30  
31  
32  
33  
34  
35  
36  
37  
38  
39  
40  
41  
42  
43  
44  
45  
46  
47  
48  
49  
50  
51  
52  
53  
54  
55  
56  
57  
58  
59  
60

### Studies on patients with pre-DM

| Study name                                                  | Setting                            | Population                                                                                                                                                                                                                                                                                                                                                                                    | Intervention vs. Control                                                                                                                                                                                                                                                                                                                                                                                       | Outcomes                                                                        | Results                                                                                                                                                                                                                                                                                                      |
|-------------------------------------------------------------|------------------------------------|-----------------------------------------------------------------------------------------------------------------------------------------------------------------------------------------------------------------------------------------------------------------------------------------------------------------------------------------------------------------------------------------------|----------------------------------------------------------------------------------------------------------------------------------------------------------------------------------------------------------------------------------------------------------------------------------------------------------------------------------------------------------------------------------------------------------------|---------------------------------------------------------------------------------|--------------------------------------------------------------------------------------------------------------------------------------------------------------------------------------------------------------------------------------------------------------------------------------------------------------|
| registration number Design                                  | Place, setting and time            | Inclusion / Exclusion criteria Characteristics                                                                                                                                                                                                                                                                                                                                                | Description with duration                                                                                                                                                                                                                                                                                                                                                                                      | Primary and secondary                                                           | Longest follow-up period with intervention effects (IG vs. CG) with SD, 95%-CI or p value                                                                                                                                                                                                                    |
| <b>Strategies to enhance physical activity</b>              |                                    |                                                                                                                                                                                                                                                                                                                                                                                               |                                                                                                                                                                                                                                                                                                                                                                                                                |                                                                                 |                                                                                                                                                                                                                                                                                                              |
| <b>RezkAllah 2019</b><br>ACTRN126170<br>00631303<br>RCT     | Egypt, urban<br>07/2017-01/2018    | Pre-DM, 25-45 yrs, BMI of 25–30 kg/m <sup>2</sup> , HbA1C 5.7–6.4%, fasting glucose 100–125 mg/dL, sedentary lifestyle<br><br>No history of diabetes, cancer, prediabetic neuropathy, stroke, pulmonary embolism, or severe musculoskeletal problems restricting physical activity                                                                                                            | n=60<br>45 % females<br>age (yrs): 32.9±5.5<br>BMI (kg/m <sup>2</sup> ): 28.3±1.4<br><br><u>IG2 (n=20):</u><br>High-volume high intensity interval training, 40 min/session<br><br><u>IG1 (n=20):</u><br>Low-volume high intensity interval training, 25 min/session<br>Both with 90 % HR maximum, 3 times/week<br><u>CG (n=20):</u><br>No exercise intervention<br><u>Duration:</u> 12 weeks                  | <u>Primary:</u> HbA1c<br><u>Other:</u> fasting glucose                          | After 3 months<br><u>HbA1c (%)</u> :<br>Benefit for IG2 and IG1: Benefit for IG: 4.87±0.34 (-26 %) vs. 5.13±0.57 (-14.5 %) vs. 6.25±0.48 (+3.38 %) (p=0.0001)<br><u>fasting glucose (mg/dL)</u> :<br>Benefit for IG2 and IG1: 90.8±4.13 (-17.8 %) vs. 93.8±4.16 (-13.2 %) vs. 103.8±7.21 (+2.9 %) (p=0.0001) |
| <b>Strategies on nutrition</b>                              |                                    |                                                                                                                                                                                                                                                                                                                                                                                               |                                                                                                                                                                                                                                                                                                                                                                                                                |                                                                                 |                                                                                                                                                                                                                                                                                                              |
| <b>Krawinkel 2018</b><br>DRKS<br>00005131<br>Cross-over-RCT | Tanzania, urban<br>10/2013-03/2014 | Individuals with pre-DM age (yrs): 30 -65, FPG 5.6-6.9 mmol/l (100–125 mg/dL) on 2 days or on one day + HbA1c 5.7-7.5 %, BMI 27–35 kg/m <sup>2</sup> , BP 90/60-160/110 mmHg, waist circumference > 80/90 cm for women / men<br><br>No chronic disease, taking regular intake of medication, identified glucose-6-phosphatase-dehydrogenase deficiency, heavy alcohol consumption, pregnancy, | n=52<br>55% female<br>age (yrs): 47.5±8.7<br>HbA1c (%):5.85±0.43<br>FPG: (mmol/l): 5.34±0.49<br>BMI (kg/m <sup>2</sup> ):29.6±2.2<br><br><u>IG/CG (n=30):</u><br>started with bitter gourd supplementation (2,5 g) over 8 wks, followed by placebo over 8 wks<br><br><u>CG/IG (n=31):</u><br>first placebo over 8 wks, followed by bitter gourd over 8 wks<br>washout period: 4 wks<br><u>Duration</u> 8 weeks | <u>Primary:</u><br>FPG<br><u>Secondary:</u><br>HbA1c, Insulin, SBP, DBP, lipids | after 8 wks<br><u>FPG (mmol/l)</u> :<br>Benefit for IG/CG: MD 0.31 (0.08-0.54)<br><u>HbA1c: (%)</u> :<br>No differences (MD 0.05)                                                                                                                                                                            |

| Study name                                                                                                                                                                                                                                                                                                                                                                                                                           | Setting                 | Population                                        | Intervention vs. Control  | Outcomes              | Results                                                                                   |
|--------------------------------------------------------------------------------------------------------------------------------------------------------------------------------------------------------------------------------------------------------------------------------------------------------------------------------------------------------------------------------------------------------------------------------------|-------------------------|---------------------------------------------------|---------------------------|-----------------------|-------------------------------------------------------------------------------------------|
| registration number<br>Design                                                                                                                                                                                                                                                                                                                                                                                                        | Place, setting and time | Inclusion / Exclusion criteria<br>Characteristics | Description with duration | Primary and secondary | Longest follow-up period with intervention effects (IG vs. CG) with SD, 95%-CI or p value |
| lactation                                                                                                                                                                                                                                                                                                                                                                                                                            |                         |                                                   |                           |                       |                                                                                           |
| BMI: Body mass index; CG: Control group; CG/IG: Crossover from CG to IG; CI: Confidence interval; DBP: Diastolic blood pressure; DM: diabetes mellitus; FPG: fasting plasma glucose; HbA1c: haemoglobin A1c; IG/CG: cross over from IG to CG; IG: intervention group; n: number of participants; MD: mean difference; RCT: randomized controlled trial; SBP: Systolic blood pressure; SD: Standard-deviation; wks: weeks; yrs: years |                         |                                                   |                           |                       |                                                                                           |

**Supplementary Table 1:** Characteristics and results of studies on patients with pre-DM

### Studies on patients with DM1

| Study name                                          | Setting                                      | Population                                                                                                                                                                                                                                                       | Intervention vs. Control                                                                                                                                                                                 | Outcomes                                                                                                                                                                                         | Results                                                                                                                                      |                                                                                                                                                                                                                                                                     |
|-----------------------------------------------------|----------------------------------------------|------------------------------------------------------------------------------------------------------------------------------------------------------------------------------------------------------------------------------------------------------------------|----------------------------------------------------------------------------------------------------------------------------------------------------------------------------------------------------------|--------------------------------------------------------------------------------------------------------------------------------------------------------------------------------------------------|----------------------------------------------------------------------------------------------------------------------------------------------|---------------------------------------------------------------------------------------------------------------------------------------------------------------------------------------------------------------------------------------------------------------------|
| registration number Design                          | Place, setting and time                      | Inclusion / Exclusion criteria Characteristics                                                                                                                                                                                                                   | Description with duration                                                                                                                                                                                | Primary and secondary                                                                                                                                                                            | Longest follow-up period with intervention effects (IG vs. CG) with SD, 95%-CI or p value                                                    |                                                                                                                                                                                                                                                                     |
| <b>Educational strategies</b>                       |                                              |                                                                                                                                                                                                                                                                  |                                                                                                                                                                                                          |                                                                                                                                                                                                  |                                                                                                                                              |                                                                                                                                                                                                                                                                     |
| <b>Malipa 2013</b><br>RCT                           | Zambia                                       | DM1, 16-19 yrs                                                                                                                                                                                                                                                   | n=40<br>55% females<br>16-17 yrs: 35 %<br>18-19 yrs: 65 %<br>Compliance: worse in IG 26.4 vs. 14.6 (p=0.001)<br>Impact of diabetes: 20.5<br>Worries about diabetes: 20.5<br>Satisfaction with life: 20.5 | <u>IG (n=20):</u> 1 meeting /wk over 8 wks<br><u>CG (n=20):</u> waiting list<br><u>Duration:</u> 8 wks                                                                                           | Compliance to treatment (Rating scale for compliance)<br>Quality of life (impact and worries about diabetes, satisfaction with life)         | After 2 months:<br>Compliance: better in IG (11.0 vs. 30; p<0.001)<br>Impact of diabetes: better in IG (16.8 vs. 24.2; p=0.045)<br>Worries about diabetes: better in IG (14.32 vs. 26.68; p=0.001)<br>Satisfaction with life: better in IG (28.5 vs. 12.5; p<0.001) |
| <b>Strategies to enhance physical activity</b>      |                                              |                                                                                                                                                                                                                                                                  |                                                                                                                                                                                                          |                                                                                                                                                                                                  |                                                                                                                                              |                                                                                                                                                                                                                                                                     |
| <b>Salem 2010</b><br>RCT                            | Egypt, urban<br><br>02/2009-11/2009          | DM1 for ≥3 years, 12-18 yrs, HbA1c ≥7.5 % for ≥6 months<br><br>no significant diabetic complications limiting exercise like, uncontrolled hypertension, diabetic keto-acidosis, severe hypoglycemia within the past 3 months, patients on lipid lowering therapy | n=196<br>61.7 % female<br>age (yrs): 14.78 ± 2.31<br>HbA1c (%): 8.7±1.7<br>duration of diabetes (yrs): 4.6 ± 1.9                                                                                         | <u>IG2 (n=73):</u> attended exercise sessions three times/week vs. <u>IG 1 (n=75):</u> attended exercise sessions once times/week vs. <u>CG (n=48):</u> no exercise<br><u>Duration: 6 months</u> | glycemic control, plasma lipids values, blood pressure, severity and frequency of hypoglycemia, anthropometric measurements and insulin dose | Change over 6 months: <u>HbA1c (%)</u> : Benefit for IG2 and IG1: 7.8 ± 1.0 vs. 8.1 ± 1.1 vs. 8.9 ± 1.3% (p=0.2)                                                                                                                                                    |
| <b>Strategies on nutrition</b>                      |                                              |                                                                                                                                                                                                                                                                  |                                                                                                                                                                                                          |                                                                                                                                                                                                  |                                                                                                                                              |                                                                                                                                                                                                                                                                     |
| <b>Abdulrhman 2013</b><br>NCT01554566<br>Cross-over | Egypt, urban, tertiary care<br><br>01/2010 - | DM1, age > 2 yrs, HbA1c< 10 %<br><br>no renal or hepatic impairment, coexisting                                                                                                                                                                                  | n=20<br>50 % females<br>age (yrs): 11.3 ± 4.3<br>duration of diabetes (yrs): 4.7±4.5                                                                                                                     | <u>IG/ CG (n=10):</u> Honey consumption (0.5 ml/kg body weight per day) vs.                                                                                                                      | <u>Primary:</u> serum lipids, c-peptide<br><u>Secondary:</u> anthropometric measures (e.g. BMI), fasting and 2h-                             | After 12 weeks: (IG/CG vs. CG/IG): <u>HbA1c (%)</u> :<br>Benefit with CG/IG: 6.7±0.9 vs. 5.9±0.8 (p<0.01)<br>no differences in change in period 1: -                                                                                                                |

| Study name<br>registration<br>number<br>Design         | Setting<br>Place,<br>setting and<br>time   | Population<br>Inclusion / Exclusion criteria<br>Characteristics                                                                                                                                                                                                                                                                                                                                           | Intervention vs. Control<br>Description with duration                                                                                                   | Outcomes<br>Primary and secondary                                                                                                                                                                                                                                                                                                  | Results<br>Longest follow-up period with<br>intervention effects (IG vs. CG) with<br>SD, 95%-CI or p value                                                                                                                                                                                                                                                                                                                                                                    |
|--------------------------------------------------------|--------------------------------------------|-----------------------------------------------------------------------------------------------------------------------------------------------------------------------------------------------------------------------------------------------------------------------------------------------------------------------------------------------------------------------------------------------------------|---------------------------------------------------------------------------------------------------------------------------------------------------------|------------------------------------------------------------------------------------------------------------------------------------------------------------------------------------------------------------------------------------------------------------------------------------------------------------------------------------|-------------------------------------------------------------------------------------------------------------------------------------------------------------------------------------------------------------------------------------------------------------------------------------------------------------------------------------------------------------------------------------------------------------------------------------------------------------------------------|
| RCT                                                    | 10 / 2011                                  | diseases or therapies that<br>may affect body weight or<br>serum lipids                                                                                                                                                                                                                                                                                                                                   | HbA1c (%): 7.21± 0.76<br>fasting glucose<br>(mg/dl): 154.5±22.5                                                                                         | <u>CG/IG (n=10)</u> : changed<br>after 12 wks and received<br>than honey<br><u>Duration</u> : 12 wks.                                                                                                                                                                                                                              | postprandial glucose,<br>HbA1c, serum lipid profile<br>5.83 ± 13.66 vs. 2.94±8.82 (p=0.105)<br><u>Fasting glucose (mg/dl)</u> :<br>• benefit with CG/IG: 142.7 ±26.6 vs.<br>116.7±19.4 (p<0.01)<br>benefit with IG/CG in period 1:-21.51 ±<br>10.84 vs. -0.08±5.14 (p=0.001)                                                                                                                                                                                                  |
| <b>Mohamad<br/>2009</b><br><br>RCT                     | Egypt,<br>urban                            | DM1, age 17 to 20 yrs<br><br>no acute metabolic<br>complications like diabetic<br>ketoacidosis, hypoglycaemia,<br>cardiovascular events, renal<br>or acute infections                                                                                                                                                                                                                                     | n=64<br>30 % female<br>age (yrs): 19.9±6.8<br>HbA1c (%): 9.52±2.08<br>fasting glucose<br>(mg/dl): 228.7±13.5<br>BMI (kg/m <sup>2</sup> ):<br>18.82±3.01 | <u>IG (n=27)</u> :<br>camel milk (500 ml)<br>+usual care<br>vs.<br><u>CG (n=27)</u> :<br>usual care for diabetes<br>(i.e. diet, exercise, insulin<br>mixtard)<br><u>Duration</u> : 16 weeks                                                                                                                                        | <u>Not specified</u> :<br>HbA1c, human C-peptide,<br>lipid profile, serum<br>insulin, anti-insulin<br>antibodies, creatinine<br>clearance, albumin<br>extraction in 24 h urine,<br>BMI, Diabetes QoL score,<br>fasting glucose<br>After 16 wks<br><u>HbA1c (%)</u> :<br>Benefit for IG: 7.16±1.84 vs. 9.59±2.05<br>fasting glucose (mg/dl):<br>benefit for IG: 227.2±17.7 vs.<br>98.9±16.2                                                                                    |
| <b>van der Hoogt<br/>2017</b><br><br>cross-over<br>RCT | South Africa                               | DM1, age 4-17 yrs on insulin<br>pump therapy, HbA1c>9,6%<br>for ≥3months, BMI/age<br>z.score -1 to < 3, total daily<br>insulin use of >0,5 u/kg<br>no remission of diabetes,<br>smoking, coeliac disease,<br>cystic fibrosis, diseases or<br>medication that are<br>associated with delayed<br>gastric emptying or altered<br>digestation, glucocorticoids,<br>oral diabetic drugs, no acute<br>illnesses | n=32<br>41% female<br>age (yrs): 10.4±4.0<br>HbA1c (%): 8.2±0.8<br>duration of Diabetes<br>(yrs): 3.5 (1.5-8.0)                                         | <u>IG1 (n=22)</u> :<br>1 home-based_low fat and<br>protein meal<br>vs.<br><u>IG2 (n=22)</u> :<br>1 high fat and protein<br>meal with identical<br>carbohydrate content<br>two meals were<br>consumed at dinner time<br>(18:00) under parental<br>supervision at least 1 day<br>apart within one month<br><u>Duration</u> : 3months | <u>primary</u> : peak sensor<br>glucose value post-meal,<br>time to peak sensor<br>glucose, time of first and<br>largest correction bolus,<br>total correction insulin,<br>total meal insulin,<br>additional insulin<br>required ,area under the<br>sensor glucose response<br>curve (AUC) (≥ 8 mmol/L),<br>duration of elevated post-<br>prandial glucose<br>Change over 12 weeks<br><u>Occurance of hypoglycaemic events</u> :<br>7 (32 %) vs. 1 patients after IG1 vs. IG2 |
| <b>Medical device</b>                                  |                                            |                                                                                                                                                                                                                                                                                                                                                                                                           |                                                                                                                                                         |                                                                                                                                                                                                                                                                                                                                    |                                                                                                                                                                                                                                                                                                                                                                                                                                                                               |
| Elbarbary<br>2016<br><br>RCT                           | Egypt,<br>urban<br><br>06/2014-<br>07/2014 | DM1, adolescents and adults<br>who wished to fast the<br>month of Ramadan with<br>insulin pump for ≥6 months<br>and attending the whole                                                                                                                                                                                                                                                                   | n=73<br>68.3% female<br>age (yrs): 15.6±2.7<br>HbA1c (%): 7.65±0.9<br>BMI (kg/m <sup>2</sup> ):                                                         | Insulin pump therapy<br>during Ramadan fasting<br><br><u>IG (n=25)</u> :<br>sensor with low glucose                                                                                                                                                                                                                                | <u>Primary</u> : hypoglycaemia<br><u>Other</u> : glucose value,<br>number of 'full fasted<br>days', emergency hospital<br>visit for diabetes-related<br>After 1 months:<br><u>Glucose value (mg/dl)</u> :<br>152.5±17.3 vs. 141±33.8 (p=0.9)<br><u>Complications</u> :<br>Number of hypoglycaemic excursions:                                                                                                                                                                 |

| Study name registration number Design           | Setting Place, setting and time     | Population Inclusion / Exclusion criteria                                                                                                                                                               | Characteristics                                                                                                                                       | Intervention vs. Control Description with duration                                                                                                       | Outcomes Primary and secondary                                                                                                                          | Results Longest follow-up period with intervention effects (IG vs. CG) with SD, 95%-CI or p value                                                                                                                                                                 |
|-------------------------------------------------|-------------------------------------|---------------------------------------------------------------------------------------------------------------------------------------------------------------------------------------------------------|-------------------------------------------------------------------------------------------------------------------------------------------------------|----------------------------------------------------------------------------------------------------------------------------------------------------------|---------------------------------------------------------------------------------------------------------------------------------------------------------|-------------------------------------------------------------------------------------------------------------------------------------------------------------------------------------------------------------------------------------------------------------------|
|                                                 |                                     | education session 2 months before fasting and committed to follow-up the given instructions                                                                                                             | 24.56±3.5 duration of diabetes (yrs): 5.8±2.9 on pump therapy (yrs): 1.73±0.99                                                                        | suspension activation vs. <u>CG (n=35):</u> sensor without low glucose suspension activation <u>Duration:</u> 1 month                                    | problem                                                                                                                                                 | 3.68±1.62 vs. 6.7±2.1 (p=0.001)<br>Number of hyperglycaemic excursions: 17.0±4.0 vs. 23.0±7.6 (p=0.001)<br>No severe hypoglycaemic events, no episodes of diabetic ketoacidosis, no hyperglycaemic events associated with ketosis no deaths or device-related SAE |
| <b>Pharmacological Strategies</b>               |                                     |                                                                                                                                                                                                         |                                                                                                                                                       |                                                                                                                                                          |                                                                                                                                                         |                                                                                                                                                                                                                                                                   |
| <b>Elbarbary 2018</b><br>NCT0292825<br><br>RCT  | Egypt, urban                        | DM1, age: 9 - 18 yrs, ≥ 5 yrs disease duration, active diabetic nephropathy in the form of microalbuminuria, HbA1c ≤ 8.5 %                                                                              | n=90<br>52.3 % female<br>age (yrs): 12.85±3.1<br>HbA1c (%):7.85±1.95                                                                                  | <u>IG (n=45):</u><br>1 g/d carnosine vs. <u>CG (n=45):</u><br>control/placebo group                                                                      | <u>Primary:</u> change in tubular damage marker<br><u>Secondary:</u> urinary albumin excretion (UAE), oxidative stress markers<br><u>Safety:</u> any AE | After 12 wks:<br><u>HbA1c (%):</u><br>• Benefit for IG: 7.4 ±1.3 vs. 8.3±2.4<br>• change -9.88±7.12 vs. 3.89±2.28 (p=0.005)<br>No adverse reactions were reported                                                                                                 |
|                                                 |                                     | no infection, renal impairment due to other causes other than diabetes, other diabetic complications, hypersensitivity to carnosine                                                                     |                                                                                                                                                       | Patients in both groups received oral ACE-Is captopril 25 mg<br><u>Duration:</u> 12 wks                                                                  |                                                                                                                                                         |                                                                                                                                                                                                                                                                   |
| <b>Elbarbary 2020</b><br>NCT03594240<br><br>RCT | Egypt, urban<br><br>03/2017-03/2018 | DM1 on insulin therapy with > 5 yrs of disease duration, 12-18 yrs, active nephropathy, HbA1c< 8.5 %, no infections, renal impairment due to other causes than diabetes, other diabetic complications , | n=80<br>55% female<br>age (yrs): 15.4 ± 1.6<br>HbA1c (%):7.95±0.5<br>fasting glucose (mg/dl): 114.5±21.8<br>duration of diabetes (years): 8.65 ± 2.65 | both groups received oral angiotensin-converting-enzyme inhibitors (captopril)<br><br><u>IG (n=40)</u> oral vitamin B complex (B1,B6,B12) once daily vs. | <u>Primary:</u> Cystatin C diet, physical activity, and metformin dosage                                                                                | after 12 weeks<br><u>HbA1c (%):</u><br>Benefit for IG: 7.5±0.6 vs. 8.0±0.6<br><u>Fasting glucose (mg/dl):</u><br>107.7±14.1 vs. 116.4±17 (p=131)                                                                                                                  |



| Study name                                                                                                                                                                                                                                                                                                                                        | Setting                 | Population                                                                                                                                                          | Intervention vs. Control                               | Outcomes              | Results                                                                                   |
|---------------------------------------------------------------------------------------------------------------------------------------------------------------------------------------------------------------------------------------------------------------------------------------------------------------------------------------------------|-------------------------|---------------------------------------------------------------------------------------------------------------------------------------------------------------------|--------------------------------------------------------|-----------------------|-------------------------------------------------------------------------------------------|
| registration number<br>Design                                                                                                                                                                                                                                                                                                                     | Place, setting and time | Inclusion / Exclusion criteria<br>Characteristics                                                                                                                   | Description with duration                              | Primary and secondary | Longest follow-up period with intervention effects (IG vs. CG) with SD, 95%-CI or p value |
|                                                                                                                                                                                                                                                                                                                                                   |                         | elevated liver enzymes,<br>hyper- or hypothyroidism,<br>hypertension, neoplasm,<br>taking any vitamins or food<br>supplements within 1 months<br>before study start | <u>CG (n=40): placebo</u><br><u>Duration: 12 weeks</u> |                       |                                                                                           |
| BMI: Body mass index; CG: Control group; CG/IG: Crossover from CG to IG; CI: Confidence interval; DM1: Type 1 diabetes; FPG: fasting plasma glucose; HbA1c: haemoglobin A1c; IG/CG: cross over from IG to CG; IG: intervention group; n: number of participants ;RCT: randomized controlled trial; SD: Standard-deviation; wks: weeks; yrs: years |                         |                                                                                                                                                                     |                                                        |                       |                                                                                           |

**Supplementary Table 2:** Characteristics and results of studies on patients with DM1

**RCTs mainly including patients with DM2**

| Study name                                  | Setting                                 | Population                                                                           | Intervention vs. Control                                                                                                                                                           | Outcomes                                                                                                                                                                                                                                                      | Results                                                                                                                                                                                                                                                                                                                                               |                                                                                                                                                                                                                                                                                                                                                                                                                                                                                                                                                  |
|---------------------------------------------|-----------------------------------------|--------------------------------------------------------------------------------------|------------------------------------------------------------------------------------------------------------------------------------------------------------------------------------|---------------------------------------------------------------------------------------------------------------------------------------------------------------------------------------------------------------------------------------------------------------|-------------------------------------------------------------------------------------------------------------------------------------------------------------------------------------------------------------------------------------------------------------------------------------------------------------------------------------------------------|--------------------------------------------------------------------------------------------------------------------------------------------------------------------------------------------------------------------------------------------------------------------------------------------------------------------------------------------------------------------------------------------------------------------------------------------------------------------------------------------------------------------------------------------------|
| registration number Design                  | Place, setting and time                 | Inclusion / Exclusion criteria Characteristics                                       | Description with duration                                                                                                                                                          | Primary and secondary                                                                                                                                                                                                                                         | Longest follow-up period with intervention effects (IG vs. CG) with SD, 95%-CI or p value                                                                                                                                                                                                                                                             |                                                                                                                                                                                                                                                                                                                                                                                                                                                                                                                                                  |
| <b>Educational strategies</b>               |                                         |                                                                                      |                                                                                                                                                                                    |                                                                                                                                                                                                                                                               |                                                                                                                                                                                                                                                                                                                                                       |                                                                                                                                                                                                                                                                                                                                                                                                                                                                                                                                                  |
| <b>Abaza 2017</b><br>NCT02868320<br><br>RCT | Egypt, urban, tertiary care, 03-07/2015 | DM2, mobile phone, capable to read SMS or live with someone who could read           | n=73<br>56 % females<br>age (yrs): 51.5±9.2<br>majority had had diabetes for > 1 yr<br>hypertension: 41.1 %<br>on insulin: 19.2 %<br>DM complication: 80.8 %<br>HbA1c (%): 9.7±2.7 | Diabetes awareness program:<br>paper-based educations material plus<br><u>IG (n=34):</u> daily messages and weekly reminders addressing various diabetes care categories vs.<br><u>CG (n=39):</u> paper-based educations material<br><u>Duration:</u> 12 wks. | <u>Primary:</u> change in Hba1C<br><u>Secondary:</u><br>Random blood glucose levels, body weight, adherence of treatment and medication, diabetes self-efficacy and knowledge, rate of hospital/ER visits, frequency of measurements, regular exercise, patients confidence in healthcare provider and satisfaction, healthcare provider's reputation | After 3 months:<br><u>HbA1c (%)</u> :<br>• No differences: 8.73 ±1.98 vs. 8.84±2.40, MD <sub>a</sub> : 0.290 (-0.402 to 0.983; p = 0.406)<br>• Benefit with IG: 47 vs. 15 % achieved the targeted 1% drop (p = 0.003)<br><u>Random blood glucose</u> (mg/dl):<br>• No difference: 181±65 vs. 201±87 (p=0.288)<br><u>Treatment adherence</u> (scores):<br>• Benefit with IG in SCI 3.42±0.48 vs. 2.52±0.49 (p<0.001) and Morisky: 3.76±0.55 vs. 2.74±1.07 (p<0.001)<br><u>Hospital /ER admission</u> (%):<br>No differences: 0 vs. 10.3 (p=0.118) |
| <b>Adibe 2013</b><br><br>RCT                | Nigeria, urban, tertiary care           | DM2, age≥ 18 yrs with oral hypoglycemic and / or insulin therapy<br><br>no pregnancy | n=220<br>58 % females<br>age (yrs): 52.6±7.9<br>duration of diabetes (yrs): 4.7±2.5,<br>60.5% with diabetes > 5 yrs<br>on insulin: 13.6 %<br>hypertension: 60.5 %                  | <u>IG (n=110):</u><br>structured self-care education and training program by pharmacists and nurses vs.<br><u>CG (n=110):</u> usual / conventional care<br><u>Duration:</u> 12 months                                                                         | <u>Primary:</u> incremental cost-utility ratio, net monetary benefit<br><u>Other:</u> quality of life                                                                                                                                                                                                                                                 | After 12 months:<br><u>Quality of life</u> :<br>• Benefit with IG: 0.86 ± 0.12 vs. 0.64 ± 0.10 (p=0.0001) improved single attributes except "hearing" functioning of the patients<br><u>Costs</u> :<br>• benefit of \$0.76±0.15 vs. \$0.64± 0.15 QALY/patient and year; MD: \$ 0.12 (0.07 to 0.16)<br>• incremental cost-utility ratio of \$571 per QALY                                                                                                                                                                                         |
| <b>Adjei 2015</b>                           | Ghana, urban                            | DM                                                                                   | n=200<br>64.5% female                                                                                                                                                              | <u>IG: (n=100):</u><br>electronical reminder for                                                                                                                                                                                                              | <u>Primary:</u> Compliance with appointment dates                                                                                                                                                                                                                                                                                                     | After 6 months:<br><u>Adherence to appointment schedules</u>                                                                                                                                                                                                                                                                                                                                                                                                                                                                                     |

| Study name<br>registration<br>number<br>Design     | Setting<br>Place,<br>setting and<br>time                                                   | Population<br>Inclusion / Exclusion criteria<br>Characteristics                                                                                                                                                                                                                                                                                                                                                                                                                    | Intervention vs. Control<br>Description with duration                                                                                                                                                                                                                                                                                            | Outcomes<br>Primary and secondary                                                                                                                                                                                                                                                                                                                                                                                          | Results<br>Longest follow-up period with<br>intervention effects (IG vs. CG) with<br>SD, 95%-CI or p value                                                                                                                |                                                                                                                                                                                                                                                                                                                                                                                                                                                                                                                                                                                                 |
|----------------------------------------------------|--------------------------------------------------------------------------------------------|------------------------------------------------------------------------------------------------------------------------------------------------------------------------------------------------------------------------------------------------------------------------------------------------------------------------------------------------------------------------------------------------------------------------------------------------------------------------------------|--------------------------------------------------------------------------------------------------------------------------------------------------------------------------------------------------------------------------------------------------------------------------------------------------------------------------------------------------|----------------------------------------------------------------------------------------------------------------------------------------------------------------------------------------------------------------------------------------------------------------------------------------------------------------------------------------------------------------------------------------------------------------------------|---------------------------------------------------------------------------------------------------------------------------------------------------------------------------------------------------------------------------|-------------------------------------------------------------------------------------------------------------------------------------------------------------------------------------------------------------------------------------------------------------------------------------------------------------------------------------------------------------------------------------------------------------------------------------------------------------------------------------------------------------------------------------------------------------------------------------------------|
| RCT                                                |                                                                                            | age (yrs):<br>< 50 yrs: 63 %<br>> 50 yrs: 37 %<br>fasting glucose<br>(mmol/l): 10.4±3.8                                                                                                                                                                                                                                                                                                                                                                                            | clinical appointments of<br>patients + alert system<br>for abnormal laboratory<br>results<br>vs.<br><u>CG: (n=100):</u><br>usual diabetes care,<br>paper based method<br><u>Duration: 6 months</u>                                                                                                                                               | <u>Other:</u> metabolic risk<br>factors, BMI                                                                                                                                                                                                                                                                                                                                                                               | (%)<br>Benefit for IG: 97.8 vs. 89.4 (p=0.010)<br><u>Fasting glucose (mmol/l):</u><br>Benefit for IG: 8.04±2.14 vs. 8.85±2.63;<br>MD 0.4 (-0.59 to -0.36, p=0.022)                                                        |                                                                                                                                                                                                                                                                                                                                                                                                                                                                                                                                                                                                 |
| <b>Amendezo<br/>2017</b><br>NCT02032108<br><br>RCT | Rwanda,<br>urban,<br>tertiary care                                                         | DM2>3mths, age>21yrs<br><br>no pregnancy or severe co-<br>morbid illnesses.                                                                                                                                                                                                                                                                                                                                                                                                        | n=251<br>69.3% females<br>age (yrs): 50.9 ±10.9<br>BMI (kg/m <sup>2</sup> ): 27.9<br>(27.0-28.5)<br>duration of diabetes :<br><10 yrs: 73.7%, >10<br>yrs: 16.3%<br>HbA1c (%): 8.98±8.6-<br>9.3                                                                                                                                                   | <u>IG (n=115):</u><br>standard care plus<br>monthly lifestyle<br>education sessions of 45<br>min duration<br>vs.<br><u>CG (n=108):</u> standard<br>care<br><u>Duration: 12 months</u>                                                                                                                                                                                                                                      | <u>Primary:</u> difference in<br>HbA1c<br><u>Secondary:</u> fasting<br>glucose, systolic and<br>diastolic blood pressure,<br>BMI                                                                                          | after 12 months:<br><u>HbA1c (%):</u><br>Benefit for IG with median reductions<br>of -1.70 (-2.09 to -1.31) vs. -0.52 (-0.95<br>to -0.10); MD: -0.72 ( -1.14 to -0.30;<br>p< 0.001)<br><u>Fasting glucose (mmol/L):</u><br>6.9 (6.45 to 7.36) vs. 9.02 (8.18 to<br>9.87) (p<0.001)                                                                                                                                                                                                                                                                                                              |
| <b>Chraibi 2017</b><br>NCT01589653<br><br>RCT      | Egypt,<br>Indonesia,<br>Morocco,<br>Saudi<br>Arabia,<br>Vietnam<br><br>05/2012-<br>07/2015 | DM2 with diagnosis ≥ 12<br>months, age≥18 , currently<br>being treated with NPH<br>Insulin for ≥ 3 months +<br>metformin (1000-1500 mg)<br>for ≥ 2 months, HbA1c ≥ 7.0%<br>≤10%, BMI ≤ 40.0 kg/m <sup>2</sup><br><br>no treatment with<br>thiazolidinedione, glucagon-<br>like peptide-1 receptor<br>agonists, pramlintide within<br>the last 3 months , >1 IU/kg<br>NPH insulin daily; previous<br>use of premixed or bolus<br>insulin, > 1 severe<br>hypoglycemic episode during | n=155<br>74.9 % female<br>age (yrs): 54.5 ±10.0<br>BMI (kg/m <sup>2</sup> ):<br>29.05±4.9<br>HbA1c (%): 8.6 ±0.83<br>fasting glucose<br>(mmol/L): 8.97<br>duration of diabetes<br>(yrs): 9.5±5.8<br>African patients:<br>• Egypt: 25.75 %<br>• Morocco: 27.7 %<br>Diabetic nephropathy<br>/ neuropathy /<br>retinopathy (%): 3.2 /<br>16.1 / 3.2 | <u>IG (n=76):</u><br>patient driven titration of<br>Biphasic insulin aspart 30<br>twice daily, 3 clinic visits<br>vs.<br><u>CG (n=79):</u><br>physician driven titration<br>twice daily, 6 clinic visits<br><br>Titration in both arms<br>according to the titration<br>protocol bases on self-<br>measured plasma glucose<br>values, measured twice<br>daily on 3 preceding days,<br>telephone contact<br>whenever deemed | <u>Primary:</u> change in HbA1c<br><u>Secondary:</u> proportion of<br>patients achieving the<br>ADA target of HbA1c<br><7.0 % and the HbA1c<br>target of <6.5 % after<br>20 weeks, FPG changes,<br>hypoglycemic episodes, | Change over 5 months:<br><u>HbA1c (%):</u><br>• Decreased in both arms with non-<br>inferiority between groups: MD -0.23<br>(-0.54 to 0.08)<br>• More patients reached HbA1c <7.0%:<br>40.8 vs. 29.1 %, RR: 1.79 (0.87 to 3.65)<br>and <6.5%: 25 vs. 19 %; RR: 1.52 (0.67<br>to 3.46)<br>• More patients reached target HbA1c<br>levels without severe or minor<br>hypoglycemic episodes: <7.0%: 38 vs.<br>27.8 %, RR: 1.52 (0.61 to 3.79), <6.5%:<br>18 vs. 14.8 %; RR 1.13 (0.36 to 3.52)<br><u>FPG (mmol/l):</u><br>• Decreased in both arms with no<br>difference between groups: 0.95±0.28 |

| Study name<br>registration<br>number<br>Design                   | Setting<br>Place,<br>setting and<br>time                           | Population<br>Inclusion / Exclusion criteria                                                                                                                              | Population<br>Characteristics                                                                                                                                       | Intervention vs. Control<br>Description with duration                                                                                                                                                                                                                                                              | Outcomes<br>Primary and secondary                                                                                                                                                                                                  | Results<br>Longest follow-up period with<br>intervention effects (IG vs. CG) with<br>SD, 95%-CI or p value                                                                                                                                                                                                                                                                                                                       |
|------------------------------------------------------------------|--------------------------------------------------------------------|---------------------------------------------------------------------------------------------------------------------------------------------------------------------------|---------------------------------------------------------------------------------------------------------------------------------------------------------------------|--------------------------------------------------------------------------------------------------------------------------------------------------------------------------------------------------------------------------------------------------------------------------------------------------------------------|------------------------------------------------------------------------------------------------------------------------------------------------------------------------------------------------------------------------------------|----------------------------------------------------------------------------------------------------------------------------------------------------------------------------------------------------------------------------------------------------------------------------------------------------------------------------------------------------------------------------------------------------------------------------------|
|                                                                  |                                                                    | the previous 12 month,<br>impaired kidney or hepatic<br>function, proliferative<br>retinopathy or maculopathy<br>requiring treatment                                      | Macroangiopathy (%):<br>5.2                                                                                                                                         | necessary<br><u>Duration</u> : 20 weeks                                                                                                                                                                                                                                                                            |                                                                                                                                                                                                                                    | vs. 0.67±0.28; MD: -0.28 (-1.07 to 0.52)<br><u>Costs</u><br>• Less frequent clinic visits to healthcare<br>professionals in IG: 4.8±0.65 vs.<br>7.5±1.42 visits/patient<br><u>Complications</u> :<br>• hypoglycemic episodes: no difference:<br>608.4 vs. 789.2 / 100 patient-years of<br>exposure; RR: 0.74 (0.44; 1.23)<br>treatment-emergent AEs: no<br>difference: 324.2 vs. 302.2 events /<br>100 patient-years of exposure |
| <b>Debussche<br/>2018</b><br>NCT01485913<br><br>RCT              | Mali,<br>urban,<br>secondary<br>care,<br><br>07/2011-<br>02/2013   | DM2, age 30-80 yrs,<br>HbA1c ≥ 8 %,<br><br>no DM1, severe diabetes<br>complications or concomitant<br>illnesses that threatened<br>their functional or vital<br>prognosis | n=151<br>76.2% female<br>age (yrs): 52.5±9.8<br>BMI (kg/m <sup>2</sup> ):28.6±5.4                                                                                   | <u>IG (n=76)</u> :<br>peer-led structured<br>patient education<br>received culturally<br>tailored structured<br>patient education (3<br>courses of 4 sessions)<br>delivered in the<br>community by five<br>trained peer educators<br>vs.<br><u>CG (n=75)</u> : conventional<br>care alone<br><u>Duration</u> :1 yr | <u>Primary</u> : HbA1c<br><u>Secondary</u> :<br>anthropometric<br>indicators (weight and<br>BMI, waist<br>circumference), SBP, DBP,<br>anti-diabetic and anti-<br>hypertensive treatment,<br>knowledge score, dietary<br>practices | Change to 12 months<br><u>HbA1c (%)</u> :<br>• Benefit in IG: MD 1.05 % (-1.54;-<br>0.56) vs. -0.15 % (-0.56; 0.26) (p =<br>0.006)                                                                                                                                                                                                                                                                                               |
| <b>Essien<br/>2017</b><br><br>PACTR201302<br>00047835<br><br>RCT | Nigeria,<br>urban,<br>tertiary<br>care,<br><br>09/2013-<br>05/2014 | DM1 or DM2, age: ≥ 18 yrs,<br>HbA1c> 8.5 %, able to engage<br>in moderate exercise,<br><br>no eye disease that would<br>limit the ability to read                         | n=118<br>60.2 % female<br>age (yrs): 52.7±10.5<br>BMI (kg/m <sup>2</sup> ):<br>28.9±7.5<br>HbA1c (%):10.7±1.6<br>type of diabetes<br>• DM1: 14.4 %<br>• DM2: 85.6 % | <u>IG: (n=59)</u> :<br>intensive and systematic<br>disease self-management<br>education programme<br>(invitation and<br>encouragement by<br>clinical staff to attend 12<br>structured teaching<br>sessions)<br>vs.                                                                                                 | <u>Primary</u> : HbA1c                                                                                                                                                                                                             | After 6 months:<br><u>HbA1c (%)</u> :<br>8.4 (8 to 8.9) vs. 10.2 (9.8 to 10.7);<br>MD <sub>a</sub> : -1.8 (-2.4 to -1.2); (p < 0.0001)                                                                                                                                                                                                                                                                                           |

| Study name<br>registration<br>number<br>Design               | Setting<br>Place,<br>setting and<br>time                                            | Population<br>Inclusion / Exclusion criteria                                                                                                                                                    | Characteristics                                                                                                                                                                                                                                     | Intervention vs. Control<br>Description with duration                                                                                                                                                                                                                                                                                                                                                                  | Outcomes<br>Primary and secondary                                                                                                                                             | Results<br>Longest follow-up period with<br>intervention effects (IG vs. CG) with<br>SD, 95%-CI or p value                                                                                                                                                                                                                                           |
|--------------------------------------------------------------|-------------------------------------------------------------------------------------|-------------------------------------------------------------------------------------------------------------------------------------------------------------------------------------------------|-----------------------------------------------------------------------------------------------------------------------------------------------------------------------------------------------------------------------------------------------------|------------------------------------------------------------------------------------------------------------------------------------------------------------------------------------------------------------------------------------------------------------------------------------------------------------------------------------------------------------------------------------------------------------------------|-------------------------------------------------------------------------------------------------------------------------------------------------------------------------------|------------------------------------------------------------------------------------------------------------------------------------------------------------------------------------------------------------------------------------------------------------------------------------------------------------------------------------------------------|
|                                                              |                                                                                     |                                                                                                                                                                                                 |                                                                                                                                                                                                                                                     | <u>CG (n=59):</u> conventional<br>disease-self-management<br>education<br><u>Duration:</u> 6 months                                                                                                                                                                                                                                                                                                                    |                                                                                                                                                                               |                                                                                                                                                                                                                                                                                                                                                      |
| <b>Fairall 2016</b><br>ISRCTN20283<br>604<br><br>Cluster-RCT | South Africa<br>,<br>urban/rural,<br>primary<br>care,<br><br>03/2011 –<br>11 / 2011 | age ≥ 18 yrs , clinics providing<br>service for NCD Patients with<br>DM, hypertension, chronic<br>respiratory disease or<br>depression, with self-<br>reported hypoglycaemic (in<br>case of DM) | n= 38 public sector<br>primary care clinics,<br>4393 patients,<br>n=1842 with DM<br>73 % female<br>age (yrs):median,<br>IQR): 52 (42-61) vs. 52<br>(44-62)<br>BMI (kg/m <sup>2</sup> ): 30±8<br>HbA1c (%):9 (4-17), in<br>HbA1c in DM≥ 7 %:<br>77 % | <u>IG (n=2166, 851 with<br/>DM):</u><br>Nurses were trained to<br>use a primary care<br>programme to support<br>and expand nurses`role in<br>NCD care and contains a<br>clinical management tool<br>with enhances<br>prescribing provisions<br>vs.<br><u>CG (n=2227, 991 with<br/>DM):</u><br>Nurses continued to use<br>the Lung Health and<br>HIV/AIDS approach with<br>usual training<br><u>Duration:</u> 14 months | <u>Primary (for DM):</u><br>treatment intensification<br>(addition or increase in<br>dose of metformin and/or<br>sulphonylurea, insulin,<br>ACE-inhibitor, aspirin,<br>statin | over 14 months<br><u>HbA1c (%):</u><br>• <7 %: 41 vs. 38 %; RR 1.08 (0.77 to<br>1.52; p=0.638)<br>• 7-10 %: 69 vs. 55 %; RR 1.30 (1.16 to<br>1.47; p<0.001)<br>• >10 %: 71 vs. 73 %; RR 0.97 (0.81 to<br>1.16; p=0.703)<br><u>Treatment intensification rates* (%):</u><br>• 57% vs. 50%, RRa: 1.11 (0.99 to 1.26)<br>(p=0.083) for patients with DM |
| <b>Hailu 2018</b><br>NCT03185689<br><br>RCT                  | Ethiopia,<br>urban,<br><br>02/2016-<br>10/2017                                      | DM2, age > 18 yrs<br><br>no DM1 or GDM, pregnant<br>women, severe cognitive or<br>physical impairment, and<br>terminally ill people                                                             | n=220<br>33 % female<br>age (yrs): 54.5±10<br>BMI (kg/m <sup>2</sup> ):25±4<br>HbA1c (%):10.5±4                                                                                                                                                     | <u>IG (n= 116):</u><br>Nurse-led disease-<br>management education:<br>6 sessions, supported<br>with illustrative pictures<br>handbooks and fliers,<br>customized to local<br>conditions by trained<br>nurses<br>vs.<br><u>CG (n=104):</u><br>usual follow-up care<br><u>Duration:</u> 9 months                                                                                                                         | <u>Primary:</u><br>patients with target<br>HbA1c ( ≤ 7 %)<br><u>Secondary:</u> systolic and<br>diastolic blood pressure,<br>fasting glucose, BMI,<br>waist circumference      | Change over 9 months:<br><u>HbA1c (%):</u><br>• No difference: 45 % vs. 50 % with<br>target values (p=0.21), MD: 2.88% (-<br>3.85 to -1.92) vs. 2.57% (-3.47 to -<br>1.67)<br><u>fasting glucose (mg/dl):</u><br>• Benefit with IG: 36 % vs.25 % with<br>target values, MD: -27 ( -45 to -9;<br>p=0.003)                                             |

| Study name                                             | Setting                                                    | Population                                                                                                                                                                    | Intervention vs. Control                                                                                                                                                                        | Outcomes                                                                                                                                                                                                                                                                                                                                                           | Results                                                                                                                                                                                                                                                                                                                               |                                                                                                                                                                                                                                                                                                                                                                                                                                                                                                                                                                                                            |
|--------------------------------------------------------|------------------------------------------------------------|-------------------------------------------------------------------------------------------------------------------------------------------------------------------------------|-------------------------------------------------------------------------------------------------------------------------------------------------------------------------------------------------|--------------------------------------------------------------------------------------------------------------------------------------------------------------------------------------------------------------------------------------------------------------------------------------------------------------------------------------------------------------------|---------------------------------------------------------------------------------------------------------------------------------------------------------------------------------------------------------------------------------------------------------------------------------------------------------------------------------------|------------------------------------------------------------------------------------------------------------------------------------------------------------------------------------------------------------------------------------------------------------------------------------------------------------------------------------------------------------------------------------------------------------------------------------------------------------------------------------------------------------------------------------------------------------------------------------------------------------|
| registration number                                    | Place, setting and time                                    | Inclusion / Exclusion criteria                                                                                                                                                | Description with duration                                                                                                                                                                       | Primary and secondary                                                                                                                                                                                                                                                                                                                                              | Longest follow-up period with intervention effects (IG vs. CG) with SD, 95%-CI or p value                                                                                                                                                                                                                                             |                                                                                                                                                                                                                                                                                                                                                                                                                                                                                                                                                                                                            |
| Design                                                 |                                                            | Characteristics                                                                                                                                                               |                                                                                                                                                                                                 |                                                                                                                                                                                                                                                                                                                                                                    |                                                                                                                                                                                                                                                                                                                                       |                                                                                                                                                                                                                                                                                                                                                                                                                                                                                                                                                                                                            |
| <b>Labhardt 2011</b><br>NCT00744458<br><br>Cluster-RCT | Cameroon rural, primary care,<br><br>08/2008-02/2010       | newly detected adult patients with DM2 and /or hypertension in the catchment area of nurse-led health centres, staffed, equipped and trained to care for DM2 and hypertension | n=33 facilities, 221 patients<br>64% females<br>age (yrs): 59.8±12.7<br>diabetes: 15.4 %<br>Overweight (BMI 25-29.9 kg/m <sup>2</sup> ): 28.5 %<br>Obesity (BMI> 30 kg/m <sup>2</sup> ): 20.4 % | <u>IG 1 (11 centres, n=55): incentive group</u><br>free treatment for 1 months for patients who regularly attended follow up visits<br>vs.<br><u>IG 2 (11 centres, n=77): letter group:</u> reminder letters in case of a missed follow-up visit<br>vs.<br><u>CG (11 centres, n=89):</u> no additional intervention<br><u>Duration:</u> 12 months                  | <u>Primary:</u><br>Patient retention at 1 yr (≥ 12 follow-up visits within 12 months)<br><u>Secondary:</u><br>Adherence with timely attendance of follow-up visit schemes and changes in blood pressure and blood glucose levels.                                                                                                     | After 12 months:<br><u>Retention rates (%):</u><br>• Benefit for IG1 and IG2 vs.CG: 60 vs. 65 vs. 29 %; MD 34 (21 to 46) with no differences between IG1 and IG2; MD - 5 (-22 to 12)<br><u>Loss to follow-up:</u><br>• Benefit for IG1 and IG2: IG1 vs. CG: HR 0.44 (0.27 to 0.72; p< 0.001)<br>• IG2 vs. CG: HR 0.38 (0.24 to 0.61; p<0.001)<br><u>Adherence (%):</u><br>• Benefit for IG1 and IG2: 38 vs. 35 vs. 10; MD 26 (14 to 42), IG1 vs CG: MD 28(13 to 37); IG2 vs. CG: MD 25 (13 to 37)<br>• no difference between IG1 and IG2: MD 3 (-14 to 20)<br><u>FPG:</u><br>No differences between groups |
| <b>Mash 2014</b><br><br>Cluster RCT                    | South Africa, urban, primary care,<br><br>12/2010 -12/2012 | DM2 with any therapy attending community health centres in the working class areas of Cape Town Metropole<br><br>no DM1, dementia, mental illness or acute illness            | n=34 public sector community health centres, 1570 patients<br>73.8% females<br>age (yrs): 56.1±11.6<br>HbA1c (%): 9.1±2.3                                                                       | <u>IG (17 health centres, n=710):</u><br>4 monthly sessions lasting 60 min with group education about diabetes topics (understanding diabetes and medication, living a healthy lifestyle and preventing complications), delivered by a health promotion officer vs.<br><u>CG (17 health centres, n=860):</u><br>usual care: ad hoc advice during consultations and | <u>Primary:</u><br>improvement of diabetes self-care activities (5 % weight loss, and a 1 % reduction in HbA1c level)<br><u>Secondary:</u><br>improved diabetes specific self-efficacy, locus of control, mean blood pressure, mean weight loss, mean waist circumference, mean HbA1c, mean total cholesterol levels, quality of life | After 12 months:<br><u>HbA1c (%):</u><br>No differences: 8.4±2.0 vs. 8.8±2.2; MD <sub>a</sub> : 0.01 (-0.27 to 0.28; p=0.967)<br><u>Adherence (self-care activities):</u><br>No differences in scores of physical activity, use of diet plan or medication, foot care or frequency of smoking<br><u>Quality of life:</u><br>No differences in physical functioning, role or social functioning, mental or general health and pain<br><u>Costs:</u><br>Incremental cost effectiveness ratio: 1862 Dollar/ QALY gained                                                                                       |

| Study name                                                 | Setting                                                       | Population                                                                                                                                                                                                                                                                                                                                                                                                                                                                                                                                    |                                                                                                                                                                                                                                                                                            | Intervention vs. Control                                                                                                                                                                                                                                                                                                                                                       | Outcomes                                                                                                                                                                                                                                 | Results                                                                                                                                           |
|------------------------------------------------------------|---------------------------------------------------------------|-----------------------------------------------------------------------------------------------------------------------------------------------------------------------------------------------------------------------------------------------------------------------------------------------------------------------------------------------------------------------------------------------------------------------------------------------------------------------------------------------------------------------------------------------|--------------------------------------------------------------------------------------------------------------------------------------------------------------------------------------------------------------------------------------------------------------------------------------------|--------------------------------------------------------------------------------------------------------------------------------------------------------------------------------------------------------------------------------------------------------------------------------------------------------------------------------------------------------------------------------|------------------------------------------------------------------------------------------------------------------------------------------------------------------------------------------------------------------------------------------|---------------------------------------------------------------------------------------------------------------------------------------------------|
| registration number<br>Design                              | Place, setting and time                                       | Inclusion / Exclusion criteria                                                                                                                                                                                                                                                                                                                                                                                                                                                                                                                | Characteristics                                                                                                                                                                                                                                                                            | Description with duration                                                                                                                                                                                                                                                                                                                                                      | Primary and secondary                                                                                                                                                                                                                    | Longest follow-up period with intervention effects (IG vs. CG) with SD, 95%-CI or p value                                                         |
|                                                            |                                                               |                                                                                                                                                                                                                                                                                                                                                                                                                                                                                                                                               |                                                                                                                                                                                                                                                                                            | occasional educational talks in waiting room<br><u>Duration:</u> 12 months                                                                                                                                                                                                                                                                                                     |                                                                                                                                                                                                                                          |                                                                                                                                                   |
| <b>Muchiri 2015</b><br><br>RCT                             | South Africa, rural, primary care,<br><br>04/2010-11/2011     | DM2, age 40-70 yrs attending community health centres, HbA1c ≥ 8 %, blood sugar levels ≥ 10 mmol/l, duration of diabetes ≥ 1 yr<br><br>no insulin therapy, pregnant women, full time employed                                                                                                                                                                                                                                                                                                                                                 | n=82<br>86.6 % female<br>age (yrs): 59±7.4<br>BMI(kg/m <sup>2</sup> ): 30.9±6.9<br>HbA1c (%): 11.1±2.0<br>duration of diabetes (yrs): 6                                                                                                                                                    | <u>IG (n=41):</u><br>education materials+ 8 weekly group educational sessions about diabetes and nutrition, follow-up sessions+vegetable gardening<br><u>CG (n=41):</u><br>education materials<br><u>Duration:</u> 12 months                                                                                                                                                   | <u>Primary:</u> HbA1c<br><u>Secondary:</u><br>Other clinical outcomes (BMI, blood pressure and blood lipids), HbA1c, dietary behaviours                                                                                                  | over 12 months<br><u>HbA1c (%):</u><br>no difference: 9.8±1.92 vs. 10.4±1.92; MD -0.63 (-0.26 to 1.50; p=0.16)                                    |
| <b>Owolabi 2019</b><br>PACTR201810<br>599931422<br><br>RCT | South Africa urban/rural, primary care<br><br>07/2018-04/2019 | DM, age ≥18 yrs, DM diagnosed at least in the last 6 months, currently receiving treatment at the selected clinics, on stable medication for ≥ 3 months prior to recruitment, uncontrolled glycaemic control, in possession of a mobile phone, able to retrieve and read SMSs and willing to receive SMSs<br><br>health or mental conditions that could interfere with the study, pregnant or planning to get pregnant within the next 6 months, debilitated or handicapped in such a way that obtaining anthropometric measurements could be | n=216<br>84.3 % females<br>age (yrs): 60.6±11.6<br>DM2 (%): 94<br>Treated with oral pills (%): 75.5<br>Duration of DM (yrs): 9.1±7.4<br>Duration of DM treatment (yrs): 8.8±7.2<br>Hypertension (%): 83.0<br>Random blood glucose (mmol/L): 14.34±3.9<br>BMI(kg/m <sup>2</sup> ): 32.2±6.2 | <u>IG (n=108):</u><br>daily SMS text-messaging SMS at an agreed time of the day, according to their needs, care plan and goal with motivational and support messages, advice on lifestyle behaviours (e.g. diets, physical activity, smoking cessation, medication and appointment reminders)<br>vs.<br><u>CG (n=108):</u><br>usual diabetes care<br><u>Duration:</u> 6 months | <u>Primary:</u> Morning random blood sugar<br><u>Secondary:</u><br>co-morbid outcomes (hypertension and obesity), obtained through blood pressure measurement, anthropometric measurements (body weight, BMI) acceptability, feasibility | Over 6 months:<br><u>Blood glucose levels</u> (mmol/L):<br>-1.58±5.29 vs. -1.95±4.69; MD 0.51(-0.8 to 1.82), MD <sub>a</sub> 0.26 (-0.81 to 1.32) |

| Study name<br>registration<br>number<br>Design | Setting<br>Place,<br>setting and<br>time                        | Population<br>Inclusion / Exclusion criteria                                                                                                                                                                                                                                                                                                                                     | Characteristics                                                                                                                                                                                                                                   | Intervention vs. Control<br>Description with duration                                                                                                                                                                                                                                                                                                                           | Outcomes<br>Primary and secondary                                                                                                      | Results<br>Longest follow-up period with<br>intervention effects (IG vs. CG) with<br>SD, 95%-CI or p value                                                                          |
|------------------------------------------------|-----------------------------------------------------------------|----------------------------------------------------------------------------------------------------------------------------------------------------------------------------------------------------------------------------------------------------------------------------------------------------------------------------------------------------------------------------------|---------------------------------------------------------------------------------------------------------------------------------------------------------------------------------------------------------------------------------------------------|---------------------------------------------------------------------------------------------------------------------------------------------------------------------------------------------------------------------------------------------------------------------------------------------------------------------------------------------------------------------------------|----------------------------------------------------------------------------------------------------------------------------------------|-------------------------------------------------------------------------------------------------------------------------------------------------------------------------------------|
|                                                |                                                                 | challenging                                                                                                                                                                                                                                                                                                                                                                      |                                                                                                                                                                                                                                                   |                                                                                                                                                                                                                                                                                                                                                                                 |                                                                                                                                        |                                                                                                                                                                                     |
| <b>Sodipo 2017</b><br>RCT                      | Nigeria,<br>primary<br>care,<br><br>03/2013-<br>11/2013         | DM2 ≥ 18 yrs. on antidiabetic<br>medication<br><br>no patients with<br>emergencies, chronic<br>complications such as<br>nephropathy, neuropathy<br>etc., those already using<br>glucometer                                                                                                                                                                                       | n=120<br>gender: 50% female<br>age (yrs): 59±10.95<br>HbA1c (%): 8.7±2.45<br>fasting glucose<br>(mg/dl): 152±60.9<br>duration of diabetes<br>(yrs): 50%> 3yrs                                                                                     | <u>IG (n=60):</u><br>Self-monitoring of blood<br>glucose before and after<br>meals 3 days a week for<br>12 weeks<br><u>CG (n=60); non SMBG</u><br><u>Duration: 12 wks</u>                                                                                                                                                                                                       | HbA1C, fasting glucose                                                                                                                 | after 3 months:<br><u>HbA1c (%):</u><br>No difference: 7.2±2.0 vs. 7.7±2.0 (p=<br>0.174)<br>fasting glucose (mg/dl):<br>No difference: 123.2±35.1 vs.<br>137.6±50.1 (p=0.087)       |
| <b>Steyn 2013</b><br><br>Cluster-RCT           | South<br>Africa,<br>urban,<br>primary<br>care,<br><br>1999-2000 | public sector primary health<br>care clinics (CHC) with ≥ 25<br>diabetes and ≥ hypertension<br>patients<br>age ≥15yrs, a documented<br>attende at the particular<br>CHC with ≥ 4 visits during the<br>previous year for<br>hypertension or diabetes who<br>received treatment for these<br>conditions at each visit<br><br>no patients being unable to<br>answer a questionnaire | 18 community health<br>centres<br>n=1096, of them<br>n= 456 with DM<br>age (yrs): 58.3 ± 11<br>gender:74 % females<br>BMI (kg/m <sup>2</sup> ):<br>30.7 ± 6.2<br>Type of Diabetes:<br>• DM1: 5.8%<br>• DM2: 91.35%<br>uncertain DM type:<br>2.85% | <u>IG (9 clinics, n=229):</u><br>introduction of structured<br>clinical record with<br>guidelines prompts after<br>training of doctors in<br>their use and suggestions<br>to incorporate them in<br>regular patient records,<br>contact over 1 year<br>vs.<br><u>CG (9 clinics, n= 227):</u><br>usual care with passively<br>disseminated guidelines<br><u>Duration: 1 year</u> | <u>primary:</u> HbA1C in the<br>diabetes group<br><u>secondary:</u><br>uncontrolled glycaemia<br>(HbA1c ≥7%) in the<br>diabetes group. | After 3 months:<br><u>HbA1c (%):</u><br>IG: 8.8% vs. 8.8%; MDa -1.0 (-1.1 to -<br>0.9)<br><u>HbA1c ≥7% (%):</u><br>no relevant difference: 64.1 vs. 62.6;<br>MD 0.90 (0.53 to 1.53) |
| <b>Takenga 2014</b><br><br>RCT                 | Congo,<br>urban                                                 | DM2, 35-75 yrs                                                                                                                                                                                                                                                                                                                                                                   | n=40<br>20 % females<br>age (yrs): 53.3 ± 10.1<br>HbA1c (%): 8.63                                                                                                                                                                                 | <u>IG (n=20):</u><br>self-management of<br>diabetes with Mobil DIAB<br>(telemedical approach)<br><br><u>vs.</u><br><u>CG (n=20):</u><br>conventional therapy<br>without telemedical<br>system                                                                                                                                                                                   | <u>primary:</u> HbA1c                                                                                                                  | after 2 months:<br><u>HbA1c (%):</u><br>Benefit for IG: 6.73±1.59 vs. vs.<br>8.6±1.35 (MD -1.87 (-2.91 to -0.83)                                                                    |



| Study name<br>registration<br>number<br>Design            | Setting<br>Place,<br>setting and<br>time                          | Population<br>Inclusion / Exclusion criteria                                                                                                                                                                                                                                                             | Characteristics                                                                                                                                                                                                                                                                                                                                                | Intervention vs. Control<br>Description with duration                                                                                                                                                                               | Outcomes<br>Primary and secondary                                                                                                                                                                               | Results<br>Longest follow-up period with<br>intervention effects (IG vs. CG) with<br>SD, 95%-CI or p value                                                                                                                                                                                                                                                                                                                                                                                                                               |
|-----------------------------------------------------------|-------------------------------------------------------------------|----------------------------------------------------------------------------------------------------------------------------------------------------------------------------------------------------------------------------------------------------------------------------------------------------------|----------------------------------------------------------------------------------------------------------------------------------------------------------------------------------------------------------------------------------------------------------------------------------------------------------------------------------------------------------------|-------------------------------------------------------------------------------------------------------------------------------------------------------------------------------------------------------------------------------------|-----------------------------------------------------------------------------------------------------------------------------------------------------------------------------------------------------------------|------------------------------------------------------------------------------------------------------------------------------------------------------------------------------------------------------------------------------------------------------------------------------------------------------------------------------------------------------------------------------------------------------------------------------------------------------------------------------------------------------------------------------------------|
| <u>Duration:</u> 60 days                                  |                                                                   |                                                                                                                                                                                                                                                                                                          |                                                                                                                                                                                                                                                                                                                                                                |                                                                                                                                                                                                                                     |                                                                                                                                                                                                                 |                                                                                                                                                                                                                                                                                                                                                                                                                                                                                                                                          |
| <b>Tawfik 2016</b><br><br>RCT                             | Egypt,<br>urban,<br>primary<br>care,<br><br>05/2015-<br>09/2015   | DM2 for $\geq 1$ yr, 40-79 yrs<br>attending an outpatient clinic<br><br>no patients who were already<br>using a similar medication<br>chart, severe or terminal<br>health conditions, or patients<br>with behavioural health issue<br>that could make it difficult to<br>understand the<br>communication | n=255<br>53.7 % females<br>age (yrs): 55.7 $\pm$ 8.35<br>HbA1c (%): 8.14 $\pm$ 1.3<br>duration of diabetes<br>(yrs): 8.3 $\pm$ 1.3                                                                                                                                                                                                                             | <u>IG (n=127):</u><br>comprehensive<br>cardiovascular risk<br>communication<br>vs.<br><u>CG (n=128):</u><br>standard usual care<br><u>Duration:</u> 3 months                                                                        | <u>Primary:</u> HbA1c<br><u>Secondary:</u><br>Cardiovascular risk<br>perception, diabetes self-<br>care, cardiovascular risk<br>scores                                                                          | After 3 months:<br><u>HbA1c (%):</u><br>Benefit for IG: 7.5 $\pm$ 0.8 vs. 8.12 $\pm$ 0.9;<br>MD -0.62 (-0.85 to -0.39)<br><u>controlled HbA1c (%):</u><br>32.7 vs. 29.9                                                                                                                                                                                                                                                                                                                                                                  |
| <b>Thuita 2020</b><br>PACTR201910<br>518676391<br><br>RCT | Kenya<br>Secondary<br>care<br>recruitment<br>08/2016 -<br>10/2016 | DM2, 20-79 yrs with regular<br>attendance of an outpatient<br>clinic<br><br>Pregnancy, complications<br>such as renal failure,<br>congestive heart failure, or<br>stroke                                                                                                                                 | n=153<br>59.5 % females<br>age (yrs). 56 $\pm$ 11.6<br>Family history of DM<br>(%): 46.6<br>Poor glycaemic<br>control (%) with<br>HbA1c>7%: 77.8<br>DM for 1-5 yrs (%):<br>58.2 %<br>Years with DM:<br>6.7 $\pm$ 6.9<br>Oral medications (%):<br>82.4<br>BMP (kg/m2): 27 $\pm$ 4.6<br>HbA1c (%): 8.49 $\pm$ 1.9<br>fasting glucose<br>(mmol/l): 11.0 $\pm$ 3.3 | <u>IG2 (n=51):</u><br>nutrition education<br>programme for 2 hrs<br>/week with peer-to-peer<br>support<br>vs.<br><u>IG1 (n=51):</u><br>Education programme<br>vs.<br><u>CG (n=51):</u><br>Standard care<br><u>Duration:</u> 8 weeks | <u>Primary:</u> metabolic<br>syndrome prevalence<br>(MetS)<br><u>Other:</u> anthropometry<br>and clinical data, blood<br>pressure, blood glucose<br>and lipid profile, physical<br>activity levels, food intake | After 6 months:<br><u>Metabolic syndrome prevalence:</u> lower<br>with IG2:<br>Harmonized criteria: 52.1 vs. 69.4 vs.<br>91.3 (p<0.001)<br>WHO: 58.3 vs. 77.6 vs. 89.1 (p=0.003)<br><u>HbA1c (%):</u><br>Mean change: no differences -<br>2.04 $\pm$ 2.70 vs. 1.48 $\pm$ 2.73 vs. -0.73 $\pm$ 2.71<br>High HbA1c: no differences: 47.9 vs.<br>29.0 vs. 34.8 %<br><u>fasting glucose (mmol/l):</u><br>no differences: -2.59 $\pm$ 0.66 vs. -<br>2.95 $\pm$ 0.64 vs. -1.55 $\pm$ 0.68<br>high fasting glucose: 79.2 vs. 83.7 vs.<br>91.3 % |

| Study name                                     | Setting                                                   | Population                                                                                                                                                                                                                               | Intervention vs. Control                                                                                                                                                                                                                                                                                                                                                                                                                                                                                   | Outcomes                                                                                                                                                                                                                                                                                                                                               | Results                                                                                                                                                                                                                                                            |                                                                                                                                                                                                                                                                                                                                                                                                                                                                                                               |
|------------------------------------------------|-----------------------------------------------------------|------------------------------------------------------------------------------------------------------------------------------------------------------------------------------------------------------------------------------------------|------------------------------------------------------------------------------------------------------------------------------------------------------------------------------------------------------------------------------------------------------------------------------------------------------------------------------------------------------------------------------------------------------------------------------------------------------------------------------------------------------------|--------------------------------------------------------------------------------------------------------------------------------------------------------------------------------------------------------------------------------------------------------------------------------------------------------------------------------------------------------|--------------------------------------------------------------------------------------------------------------------------------------------------------------------------------------------------------------------------------------------------------------------|---------------------------------------------------------------------------------------------------------------------------------------------------------------------------------------------------------------------------------------------------------------------------------------------------------------------------------------------------------------------------------------------------------------------------------------------------------------------------------------------------------------|
| registration number                            | Place, setting and time                                   | Inclusion / Exclusion criteria                                                                                                                                                                                                           | Description with duration                                                                                                                                                                                                                                                                                                                                                                                                                                                                                  | Primary and secondary                                                                                                                                                                                                                                                                                                                                  | Longest follow-up period with intervention effects (IG vs. CG) with SD, 95%-CI or p value                                                                                                                                                                          |                                                                                                                                                                                                                                                                                                                                                                                                                                                                                                               |
| <b>Webb 2015</b><br>NCT01275040                | South Africa, urban, primary care,<br><br>06/2010-03/2011 | primary health_care clinics, patients with clinical diagnosis of DM2 or DM1_for ≥5yrs, age ≥ 18 yrs                                                                                                                                      | n= 12 primary health care clinics<br>n= 599<br>gender:68.5 % female<br>age (yrs): 57.8±10.5<br>HbA1c (%): 8.73±2.3<br>HbA1c ≥ 7 %: 73 %<br>BMI (kg/m <sup>2</sup> ): 30.8±6.7<br>Typ of diabetes:<br><ul style="list-style-type: none"> <li>• DM1: 3.7 %,</li> <li>• DM2: 70.3 %</li> <li>• unknown: 26 %</li> </ul> duration of Diabetes:<br><ul style="list-style-type: none"> <li>• &lt; 5 yrs: 47.3 %</li> <li>• 5-10 yrs: 22.0 %</li> <li>• &gt; 10 yrs: 20.2 %</li> <li>• unknown: 10.5 %</li> </ul> | <u>IG (n=328):</u><br>mobile screening team visits primary care clinic and provides education and active screening for diabetic complications (foot, kidney, cardiac and renal complications) vs.<br><u>CG(n=273):</u><br>no mobile screening team, routine care with similar education for patients. and health care workers<br><u>Duration:</u> 1 yr | <u>Primary:</u> HbA1c, detected neuropathy, nephropathy and retinopathy, HbA1c categories<br><u>Secondary:</u> detected complications, referred patients for complication assessment or care, blood pressure and lipid control, costs, LDL cholesterol, creatinine | after 12 months<br><u>HbA1c (%):</u><br>no difference: 8.54±2.11 vs. 8,76 ±2.2, MD-0.22 (-0.64, 0.20)<br><u>screening rate for complications:</u> in IG 60% increase of screening in all complication indicator groups, in both groups testing of HbA1c and renal complications (serum-creatinine) increased , but no significant difference , screening for eye complications, only increased significantly in IG<br>no significant difference in the proportion of actions taken between IG and CG (p=0.83) |
| <b>Strategies to enhance physical activity</b> |                                                           |                                                                                                                                                                                                                                          |                                                                                                                                                                                                                                                                                                                                                                                                                                                                                                            |                                                                                                                                                                                                                                                                                                                                                        |                                                                                                                                                                                                                                                                    |                                                                                                                                                                                                                                                                                                                                                                                                                                                                                                               |
| <b>Asuako 2017</b><br><br>RCT                  | Ghana, urban, tertiary care,<br><br>08/2015-03/2016       | DM, age: 20-68 yrs, ambulant patients, without diabetes complications with < 150 minutes /wk of moderate physical activity<br>no SBP > 140 or DBP> 90 mmHg, bilateral or unilateral lower or upper limbs amputation, use of insulin pump | n=12<br>83% female<br>age (yrs): 83% were 46-55 yrs.<br>BMI (kg/m <sup>2</sup> ):25.4±4.5<br>fasting glucose (mmol/l):9.33 ± 5.7<br>type of diabetes:<br>DM1: 17 %<br>DM2: 83 %<br>duration of diabetes (yrs):<br><ul style="list-style-type: none"> <li>• 1-5 yrs: 25 %</li> <li>• 6-10 yrs: 50 %</li> <li>• 10 yrs: 25 %</li> </ul>                                                                                                                                                                      | <u>IG (n=7):</u><br>walking aerobic exercise sessions without treadmills (3/week) vs.<br><u>CG (n=5):</u><br>only activity of daily living<br><br>Both continued regular medical/clinical routines<br><u>Duration:</u> 8 weeks                                                                                                                         | FPG, Lipid profile, body weight, BMI<br><br>Change over 2 months:<br><u>FPG (mmol/l):</u><br>Benefit for IG: 6.27 ± 0.91 vs. 8.00 ± 0.96; MD 1.73 (-1.88 to -1.59; p<0.001)                                                                                        |                                                                                                                                                                                                                                                                                                                                                                                                                                                                                                               |

| Study name<br>registration<br>number<br>Design | Setting<br>Place,<br>setting and<br>time             | Population<br>Inclusion / Exclusion criteria                                                                                                                                                                                                                                       | Characteristics                                                                                                                                                                                           | Intervention vs. Control<br>Description with duration                                                                                                                                                                                                              | Outcomes<br>Primary and secondary                                                                                            | Results<br>Longest follow-up period with<br>intervention effects (IG vs. CG) with<br>SD, 95%-CI or p value                                                                                                                                                                          |
|------------------------------------------------|------------------------------------------------------|------------------------------------------------------------------------------------------------------------------------------------------------------------------------------------------------------------------------------------------------------------------------------------|-----------------------------------------------------------------------------------------------------------------------------------------------------------------------------------------------------------|--------------------------------------------------------------------------------------------------------------------------------------------------------------------------------------------------------------------------------------------------------------------|------------------------------------------------------------------------------------------------------------------------------|-------------------------------------------------------------------------------------------------------------------------------------------------------------------------------------------------------------------------------------------------------------------------------------|
| <b>Fayehun 2018</b>                            | Nigeria,<br>urban<br>06/2014-<br>11/2014             | DM2, age 18-64 yrs,<br>Diagnosed $\geq$ 12 months, non-<br>insulin dependent, on dietary<br>control $\pm$ hypoglycemic<br>agents, able to walk without<br>limitations<br><br>no pregnant women,<br>smokers, prescription of<br>medications that might<br>impair ability to walk    | n= 46<br>63 % female<br>age (yrs): 54 $\pm$ 7.7 (33-<br>64)<br>BMI (kg/m <sup>2</sup> ):<br>22.4 $\pm$ 3.3<br>HbA1c (%): 6.6 (5.3-<br>9.0)<br>duration of diabetes<br>(yrs): <7 yrs: 70 %,<br>>7 yrs 30 % | <u>IG (n=23):</u><br>Goal to accumulate<br>10000 steps per day<br>vs.<br><u>CG (n=23):</u><br>normal activity habits<br><u>Duration:</u> 10 weeks                                                                                                                  | <u>Primary:</u> HbA1c<br><u>Secondary:</u> step count                                                                        | Change over 2.5 months:<br><u>HbA1c (%):</u><br>Benefit for IG: 6.26 (6.19 to 6.33) vs.<br>6.82 (6.69 to 6.95); MD <sub>a</sub> : -0.74 (-1.32<br>to -0.02; p=0.015)                                                                                                                |
| <b>Maharaj 2016</b><br><br>RCT                 | Nigeria,<br>rural<br><br>07/2013-<br>06/2014         | DM2, non- insulin dependent,<br>blood glucose levels 6 -<br>13 mmol/l<br><br>no cardiac, abdominal or<br>spinal surgery $\leq$ 6 months,<br>history of fractures of lower<br>limbs, spine, weakness,<br>deformities, loss of sensation<br>in the feet, retinopathy,<br>nephropathy | n=90<br>52 % females<br>age (yrs): 39.4 $\pm$ 8.6<br>(30-58)<br>BMI (kg/m <sup>2</sup> ): 27.7 $\pm$ 5.8<br>HbA1c (%): 8.79 $\pm$ 2.11<br>duration of diabetes<br>(yrs): 2.5 $\pm$ 2.1                    | <u>IG (n=45):</u><br>rebound exercise 3<br>times/week for 20-<br>30 min, moderate<br>intensity of 40-60 % of HR<br>maximum<br>vs.<br><u>CG (n=45):</u><br>watched videos and read<br>health magazines<br><u>Duration:</u> 9 weeks                                  | <u>Primary:</u><br>HbA1c , FPG, BMI<br><u>Other:</u><br>Heart and respiratory<br>rates, blood pressure,<br>oxygen saturation | After 9 weeks<br><u>HbA1c (%):</u><br>Benefit for IG: 7.12 $\pm$ 1.19 vs. 8.36 $\pm$ 1.25;<br>MD <sub>a</sub> : 0.904 (0.832 to 0.984; p=0.017)<br><u>FPG (mmol/l):</u><br>Benefit for IG: 6.92 $\pm$ 1.21 vs. 8.73 $\pm$ 1.23;<br>MD <sub>a</sub> : 0.787 (0.7345- 0.841; p=0.002) |
| <b>van Rooijen<br/>2004</b><br><br>RCT         | South<br>Africa,<br>urban<br><br>03/2002-<br>11/2002 | black women with DM2, age<br>40-65yrs, duration of DM $\geq$ 12<br>months<br><u>no</u> chest pain on effort,<br>possible previous myocardial<br>infarction and intermittent<br>claudication, cerebro-<br>vascular incidents, arthritis,<br>retinopathy                             | n=158<br>gender:100 % females<br>age (yrs): 54-55<br>HbA1c (%): 9.35                                                                                                                                      | <u>IG (n=80):</u><br>education+ incremental<br>daily home exercise, use<br>of daily physical activity<br>records+6 fortnightly<br>supervised aerobic<br>exercise classes<br>vs.<br><u>CG(n=77):</u><br>education+ relaxation<br>exercise<br><u>Duration:</u> 12wks | <u>Primary:</u> HbA1c, BMI<br><u>Secondary:</u> walking<br>distance (6 min walk)                                             | Change over 3 months:<br><u>HbA1c (%):</u><br>no difference: 8.99 $\pm$ 2.59 vs. 8.26 $\pm$ 1.97                                                                                                                                                                                    |
| <b>Yan 2014</b>                                | Mozambiqu<br>e,                                      | DM2, male, age 40-70 yrs,<br>diagnosis for $\geq$ 12 months                                                                                                                                                                                                                        | n=41<br>100% male                                                                                                                                                                                         | <u>IG (n=31):</u><br>low or vigorous intensity                                                                                                                                                                                                                     | plasma glucose, HbA1c                                                                                                        | Change over 3 months:<br><u>HbA1c (%):</u>                                                                                                                                                                                                                                          |

| Study name                        | Setting                 | Population                                                                                                                                                          | Intervention vs. Control                                                                                                | Outcomes                                                                                                                                                                                                                              | Results                                                                                                                                                                                                                                                                                                                                                                      |
|-----------------------------------|-------------------------|---------------------------------------------------------------------------------------------------------------------------------------------------------------------|-------------------------------------------------------------------------------------------------------------------------|---------------------------------------------------------------------------------------------------------------------------------------------------------------------------------------------------------------------------------------|------------------------------------------------------------------------------------------------------------------------------------------------------------------------------------------------------------------------------------------------------------------------------------------------------------------------------------------------------------------------------|
| registration number               | Place, setting and time | Inclusion / Exclusion criteria                                                                                                                                      | Description with duration                                                                                               | Primary and secondary                                                                                                                                                                                                                 | Longest follow-up period with intervention effects (IG vs. CG) with SD, 95%-CI or p value                                                                                                                                                                                                                                                                                    |
| RCT                               | urban                   | no known diseases other than DM2 and hypertension, no diagnosed cardiovascular diseases                                                                             | age(yrs): 54±2.5<br>HbA1c: 8.6±0.7<br>plasma glucose (mmol/l): 9.65±1.2<br>BMI ( kg/m <sup>2</sup> ): 27.1 ± 1.0        | exercise 3-5 times/week vs.<br><u>CG(n=10):</u><br>walked 1 hour per day as part of their daily lifestyle<br><u>Duration:12 wks</u>                                                                                                   | reduction in both groups with no differences between groups: 7.7±0.4 vs. 7.7±0.8<br><u>Plasma glucose (mmol/l):</u><br>9.6 ± 0.7 vs. 11.1 ± 1.3                                                                                                                                                                                                                              |
| <b>Pharmacological strategies</b> |                         |                                                                                                                                                                     |                                                                                                                         |                                                                                                                                                                                                                                       |                                                                                                                                                                                                                                                                                                                                                                              |
| <b>Distiller 2014</b>             | South Africa            | DM2 for ≥ 1 year with total insulin requirement of >200 U/d for ≥ 3 months, BMI > 30 kg/m <sup>2</sup> , HbA1c> 7,5 %, on long-term metformin therapy (1.7–2.5 g/d) | n=28<br>50% female<br>age (yrs): 51.7 (36-71)<br>HbA1c (%): 8.95 (7.6-11.3)<br>BMI (kg/m <sup>2</sup> ): 40.8 (31.2-47) | <u>IG (n=14):</u><br>regular Insulin (500 U/ml) + metformin + exenatide (5 µg orally twice a day for 1 month and titrated to 10 µg)<br>vs.<br><u>CG (n=14):</u><br>regular Insulin (500 U/ml) +metformin<br><u>Duration: 6 months</u> | <u>Primary:</u> HbA1c<br><u>Secondary:</u> Body weight, insulin dose, hypoglycemia<br>Change to 6 months:<br><u>HbA1c (%):</u><br>Significant improvement in both groups<br>8.7→7.7(p=0.002) vs. 9.2→7.5 (p=0.0001)<br>With no difference between groups (MD: 0.28; p=0.80)<br><u>Complications:</u><br>Mild hypoglycaemia: 5 vs. 2 persons with 20 vs. 5 events (p ≤ 0.001) |
| <b>EI-Haggar 2015</b>             | Egypt, urban            | DM2, age: 45-55 yrs, obese (BMI≥30 kg/m <sup>2</sup> ), with duration 5-10 yrs, treated with glimepiride alone                                                      | n=48<br>79 % female<br>age (yrs): 50.1±4.6<br>HbA1c (%): 7.83±0.87<br>fasting glucose (mg/dl): 193±50                   | <u>IG1 (n=16):</u><br>glimepiride (3 mg/d) + 2 (1 mg twice/d)<br>vs.<br><u>IG2 (n=16):</u><br>glimepiride (3 mg/d) +                                                                                                                  | <u>not specified:</u><br>glycemic markers, metabolic markers, adiponectin, interleukin-6, leukotriene B4, mast cell tryptase, lipid panel,<br>Changes over 12 weeks:<br><u>HbA1c (%):</u><br>• Highest benefit for IG1: 7.1±0.86 vs. 8.2±0.82 vs. 8.7±0.93 (p< 0.05)<br><u>fasting glucose (mg/dl):</u><br>• Highest benefit for IG1: 199±38 vs.                             |

| Study name<br>registration<br>number<br>Design | Setting<br>Place,<br>setting and<br>time                                  | Population<br>Inclusion / Exclusion criteria                                                                                                                                                                                                                                                                                                                                                                                                                         | Characteristics                                                                                                                                     | Intervention vs. Control<br>Description with duration                                                                                                                                                                                                                | Outcomes<br>Primary and secondary                                                                                | Results<br>Longest follow-up period with<br>intervention effects (IG vs. CG) with<br>SD, 95%-CI or p value                                                                                                                                                                                                                                                                                                   |
|------------------------------------------------|---------------------------------------------------------------------------|----------------------------------------------------------------------------------------------------------------------------------------------------------------------------------------------------------------------------------------------------------------------------------------------------------------------------------------------------------------------------------------------------------------------------------------------------------------------|-----------------------------------------------------------------------------------------------------------------------------------------------------|----------------------------------------------------------------------------------------------------------------------------------------------------------------------------------------------------------------------------------------------------------------------|------------------------------------------------------------------------------------------------------------------|--------------------------------------------------------------------------------------------------------------------------------------------------------------------------------------------------------------------------------------------------------------------------------------------------------------------------------------------------------------------------------------------------------------|
|                                                |                                                                           | severe hepatic or renal<br>disease, epilepsy<br>pregnant/lactating females                                                                                                                                                                                                                                                                                                                                                                                           | BMI (kg/m <sup>2</sup> ):<br>37.6±4.6<br>duration of diabetes<br>(yrs): 7.7 ±2.6                                                                    | ketotifen (1 mg once/d)<br>vs.<br><u>CG (n=16):</u><br>gliimepiride (3 mg/d)<br>alone<br><u>Duration: 12 weeks</u>                                                                                                                                                   | BMI                                                                                                              | 207.7± 47.6 (p< 0.05)                                                                                                                                                                                                                                                                                                                                                                                        |
| <b>Malek 2015</b><br><br>RCT                   | Egypt,<br>Algeria,<br>Tunisia,<br>South Africa<br><br>03/2010-<br>05/2012 | DM2, age ≥ 18 yrs, currently<br>treated with suboptimal dose<br>of oral anti-diabetic drugs;<br>HbA1c 7-11 % (under<br>metformin-monotherapy)<br>and ≤ 10 % (under<br>combination therapy),<br>BMI≤40 kg/m <sup>2</sup><br><br>no allergies or<br>contraindications to the<br>product, pregnant or<br>breastfeeding, impaired<br>hepatic or renal function,<br>cardiovascular history,<br>uncontrolled hypertension,<br>proliferative retinopathy,<br>macular oedema | n=403<br>age (yrs): 52.8±9.6<br>59.8 % female<br>HbA1c (%): 8.65<br>BMI (kg/m <sup>2</sup> ):<br>29.7±4.5<br>duration of diabetes<br>(yrs): 7.5±5.1 | Stepwise individual<br>insulin intensification of<br><u>IG (n=200):</u><br>basal-bolus insulin<br>analogues (insulin<br>detemir +Insulin aspart)<br>vs.<br><u>CG (n=203):</u><br>thrice daily biphasic<br>insulin aspart depending<br>on HbA1c-values over<br>50 wks | <u>Primary:</u><br>HbA1c<br><u>Secondary:</u><br>patients achieving HbA1c<br>< 7.0 %, prandial plasma<br>glucose | Change over 50 weeks:<br><u>HbA1c (%):</u><br>Non-inferiority: 7.4 vs. 7.3; MD 0.1 (-<br>0.1 to 0.3 (full-analysis set), MD 0.2 (-<br>0.1 to 0.4 (per protocol)<br>40.3% and 44.9% achieved<br>HbA1c<7.0%<br><u>Hypoglycaemia (events/patient year):</u><br>9.4 vs. 9.8<br><u>Serious adverse events:</u><br>6.5 vs. 3.4 % with 1 treatment-related<br>SAE in CG<br><u>Adverse events:</u><br>58.5 vs. 63.1% |
| <b>Strategies on food supplementation</b>      |                                                                           |                                                                                                                                                                                                                                                                                                                                                                                                                                                                      |                                                                                                                                                     |                                                                                                                                                                                                                                                                      |                                                                                                                  |                                                                                                                                                                                                                                                                                                                                                                                                              |

1  
2  
3  
4  
5  
6  
7  
8  
9  
10  
11  
12  
13  
14  
15  
16  
17  
18  
19  
20  
21  
22  
23  
24  
25  
26  
27  
28  
29  
30  
31  
32  
33  
34  
35  
36  
37  
38  
39  
40  
41  
42  
43  
44  
45  
46

| Study name registration number Design | Setting Place, setting and time                              | Population Inclusion / Exclusion criteria                                                                                                                                                                                                                                                                                                                                                                                                                                                   | Characteristics                                                                                                                                                                                                            | Intervention vs. Control Description with duration                                                                                                                                                                                                                                                                                                                                            | Outcomes Primary and secondary                                                                                                                                                                                                       | Results Longest follow-up period with intervention effects (IG vs. CG) with SD, 95%-CI or p value                                                                                                                                                                                                                                                                                                             |
|---------------------------------------|--------------------------------------------------------------|---------------------------------------------------------------------------------------------------------------------------------------------------------------------------------------------------------------------------------------------------------------------------------------------------------------------------------------------------------------------------------------------------------------------------------------------------------------------------------------------|----------------------------------------------------------------------------------------------------------------------------------------------------------------------------------------------------------------------------|-----------------------------------------------------------------------------------------------------------------------------------------------------------------------------------------------------------------------------------------------------------------------------------------------------------------------------------------------------------------------------------------------|--------------------------------------------------------------------------------------------------------------------------------------------------------------------------------------------------------------------------------------|---------------------------------------------------------------------------------------------------------------------------------------------------------------------------------------------------------------------------------------------------------------------------------------------------------------------------------------------------------------------------------------------------------------|
| <b>Ali 2019</b><br><br>RCT            | Egypt<br>Urban,<br>tertiary care<br><br>09/2017 –<br>04/2018 | DM2, oral antidiabetic agents with no change of type and dosage of antidiabetic agents in the past 3 months, ≥ 30 years<br><br>insulin-dependence, pregnancy, lactation, use of Ca, multivitamins, Vitamin D supplements, use of drugs that affect Vitamin D status, dietary Ca intake > 1500 mg/d, hypo- or hyperthyroidism, smoking, use of antiepileptic drugs, sarcoidosis, tuberculosis, potentially terminal illness, inflammatory bowel disease, liver or kidney disease, malignancy | n=85<br>age (yrs): 54.6 ±2.8<br>68 % females<br>BMI (kg/m <sup>2</sup> ): 28.6±3.3<br>Diabetic duration (yrs): 4.4±2.1<br>fasting glucose (mg/dL): 168±54.4<br>fasting serum insulin (μU/mL): 18.1±8.3<br>HbA1c(%):8.8±1.8 | oral antidiabetic agents as usual +<br><u>IG 1 (n=22):</u><br>continuous oral Vitamin D3 (4000 IU/ d)<br>vs.<br><u>IG 2 (n=22):</u><br>intermittent regimen of Vitamin D3 (50 000 IU/ week)<br>vs.<br><u>IG 3 (n=21):</u><br>single IM injection of 300 000 IU of Vitamin D3 at the start of the study<br>vs.<br><u>CG (n=20):</u> only oral antidiabetic agents<br><u>Duration:</u> 3 months | Not specified: serum creatinine, blood urea nitrogen, total and ionized Ca, serum phosphorus, fasting glucose, fasting serum insulin, 25(OH)D3 levels, HbA1c                                                                         | After 3 months:<br><u>fasting glucose</u> (mg/dL): higher decrease in IG1 and IG2: -20.9±18.1 vs. -23.0±37.9 vs. -3.5±6.9 vs. 1.0±5.6 (p<0.001)<br><u>fasting serum insulin</u> (μU/mL): higher decrease in IG1 and IG2: -4.44±5.2 vs.- 5.88±4.6 vs. -1.55±9.4 vs. 0.10±1.0 (p< 0.001)<br><u>HbA1c (%)</u> :higher decrease in IG1 and IG2: -0.81±0.77 vs. -0.82±0.87 vs. - 0.34±1.47 vs. 0.05±0.08 (p<0.001) |
| <b>Anderson 2001</b><br><br>RCT       | Tunesia,<br>urban                                            | DM2 ≥ 5y, age< 65 yrs, fasting glucose > 8 mmol/l and HbA1C > 7.5 %<br><br>no pregnant or lactating women, receiving trace element supplements in past 3 months, with gastric or diuretic treatment, acute renal, acute infection or recent surgery                                                                                                                                                                                                                                         | n=110<br>age (yrs): 53.2 ±16.8<br>BMI (kg/m <sup>2</sup> ): 29.1±1.0<br>HbA1c (%):8.82±3.25<br>fasting glucose (mmol/l): 11.45±0.83<br>duration of diabetes (months): 73.6±66                                              | <u>IG 1 (n=27):</u><br>Zinc (30 mg/d)<br>vs.<br><u>IG 2 (n=27):</u><br>Chromium (400 μg/d)<br>vs.<br><u>IG 3 (n=27):</u><br>Zinc (30 mg /d) + Chromium (400 μg /d)<br>vs.<br><u>CG (n=29):</u><br>placebo<br><u>Duration:</u> 6 months                                                                                                                                                        | Not specified: HbA1C, fasting glucose plasma concentrations of zinc, copper, selenium, urinary chromium and zinc, Plasma thiobarbituric acid reactive substances, copper-zinc-superoxid dismutase, selenium - glutathione peroxidase | Change over 6 months:<br><u>HbA1c (%)</u> : 7.7±1.6 vs. 7.4±1.4 vs. 8.1±1.6<br>CG: not reported                                                                                                                                                                                                                                                                                                               |
| <b>Anyanwu 2016</b>                   | Nigeria,<br>urban                                            | DM2, age 35-65 yrs on oral antidiabetics with vitamin D                                                                                                                                                                                                                                                                                                                                                                                                                                     | n=42<br>57.6 % female                                                                                                                                                                                                      | <u>IG (n=21):</u><br>Vitamin D3 supplements                                                                                                                                                                                                                                                                                                                                                   | <u>Primary:</u> HbA1c<br><u>Other:</u> fasting glucose,                                                                                                                                                                              | Changes over 12 wks:<br><u>HbA1c (%)</u> :                                                                                                                                                                                                                                                                                                                                                                    |

| Study name<br>registration<br>number<br>Design | Setting<br>Place,<br>setting and<br>time                   | Population<br>Inclusion / Exclusion criteria                                                                                                                                                                                                                                                                                                                                                                                                                                                                                                                                                                                    | Characteristics                                                                                                                                                                             | Intervention vs. Control<br>Description with duration                                                                                                                                          | Outcomes<br>Primary and secondary                                                            | Results<br>Longest follow-up period with<br>intervention effects (IG vs. CG) with<br>SD, 95%-CI or p value                                                                                                                                                                                                                                                                                                  |
|------------------------------------------------|------------------------------------------------------------|---------------------------------------------------------------------------------------------------------------------------------------------------------------------------------------------------------------------------------------------------------------------------------------------------------------------------------------------------------------------------------------------------------------------------------------------------------------------------------------------------------------------------------------------------------------------------------------------------------------------------------|---------------------------------------------------------------------------------------------------------------------------------------------------------------------------------------------|------------------------------------------------------------------------------------------------------------------------------------------------------------------------------------------------|----------------------------------------------------------------------------------------------|-------------------------------------------------------------------------------------------------------------------------------------------------------------------------------------------------------------------------------------------------------------------------------------------------------------------------------------------------------------------------------------------------------------|
| RCT                                            |                                                            | deficiency and poor glycemic control (HbA1c > 6.5 %)                                                                                                                                                                                                                                                                                                                                                                                                                                                                                                                                                                            | age (yrs): 51.8±2.05<br>HbA1c (%): 7.88<br>fasting glucose (mg/dl): 152.8±56.5                                                                                                              | (3000 IU/d)<br>vs.<br><u>CG(n=21):</u><br>placebo<br><u>Duration:</u> 12 weeks                                                                                                                 | levels of serum Vitamin D, calcium, albumin, phosphate, creatinine, and alanine transaminase | <ul style="list-style-type: none"> <li>MD (IG vs. CG): -0.66 (-0.161 to 0.29) vs 0.38 (-0.08 to 0.84);</li> <li>MD: -1.04 (-2.09 to 0.01)</li> <li>change from poor glycemic control (HbA1c&gt;6.5 %) to normal HbA1c (%): benefit for IF: 33.3 vs. -9.1 (p&lt;0.05)</li> </ul> <u>fasting glucose (mg/dl):</u><br>137.2±33.6 vs. 154±67.5<br><u>patient adherence</u> (tablet counts, %):<br>62.2 vs. 59.9 |
| <b>El Gayar 2019</b><br><br>RCT                | Egypt,<br>urban,<br>outpatients<br><br>01/2017-<br>01/2018 | DM2 for < 6 months, 30-60 yrs, HbA1c level < 9%, BMI≥30 kg/m <sup>2</sup><br><br>no insulin therapy, any injectable or oral antidiabetic medication other than metformin, no smoking, consumption of alcohol or narcotic drugs, no acute illnesses at the baseline or during the study, no pregnancy or lactation, autoimmune disorder, cardiac or renal diseases, thyroid, chronic inflammatory diseases, peptic ulcer, regular consumption of ginger or other herbal drugs, hypersensitivity to ginger, consumption of lipid lowering drugs or oral contraceptive pills or any supplements 2 months before starting the study | n=80<br>49 % female<br>age (yrs): 46.2 ± 9.1<br>HbA1c (%): 8.04±0.5<br>fasting glucose (mg/dl): 176.9±18.3<br>Fasting serum insulin (mIU/L): 19.3±3.3<br>BMI (kg/m <sup>2</sup> ): 32.3±1.4 | diet, physical activity, and metformin<br><u>IG (n=40):</u><br>ginger powder supplementation (600 mg/capsule, 3 capsules/d)<br>vs.<br><u>CG (n=40):</u><br>Placebo<br><u>Duration:</u> 8 weeks | <u>Not specified:</u> glycemic status, lipid profile and beta-cell function                  | After 8 wks:<br><u>HbA1c (%)</u> :<br>decrease in both groups to 6.94±0.38 vs. 7.26±0.45<br><u>Fasting serum insulin</u> (mIU/L):<br>decrease in both groups to 12.86±2.59 vs. 13.21±2.08<br>fasting glucose (mg/dl):<br>decrease in both groups to 120.88±9.06 vs. 151.70±13.23                                                                                                                            |

| Study name<br>registration<br>number<br>Design | Setting<br>Place,<br>setting and<br>time                     | Population<br>Inclusion / Exclusion criteria                                                                                                                                                                                                                                                                                                                                                                                                                                                                                                                       | Characteristics                                                                                                                                         | Intervention vs. Control<br>Description with duration                                                                                                                                                                    | Outcomes<br>Primary and secondary                                                                                                                                                                                                                   | Results<br>Longest follow-up period with<br>intervention effects (IG vs. CG) with<br>SD, 95%-CI or p value                                                                                                          |
|------------------------------------------------|--------------------------------------------------------------|--------------------------------------------------------------------------------------------------------------------------------------------------------------------------------------------------------------------------------------------------------------------------------------------------------------------------------------------------------------------------------------------------------------------------------------------------------------------------------------------------------------------------------------------------------------------|---------------------------------------------------------------------------------------------------------------------------------------------------------|--------------------------------------------------------------------------------------------------------------------------------------------------------------------------------------------------------------------------|-----------------------------------------------------------------------------------------------------------------------------------------------------------------------------------------------------------------------------------------------------|---------------------------------------------------------------------------------------------------------------------------------------------------------------------------------------------------------------------|
| <b>EI-Sheikh<br/>2019</b><br><br>RCT           | Egypt,<br>urban                                              | DM2 on glimepiride alone,<br>age ≥30 yrs<br><br>no insulin sensitizers,<br>steroids, NSAIDs, warfarin or<br>lipid lowering medications,<br>thyroid hormones, valproic<br>acid or suffered from: acute<br>or chronic inflammatory<br>diseases, end-stage renal<br>disease undergoing dialysis,<br>hypothyroidism epilepsy,<br>pregnant and breast-feeding<br>women                                                                                                                                                                                                  | n= 72<br>67 % female<br>age (yrs): 50.6±8.7<br>HbA1c (%):9.76±1<br><br>fasting glucose<br>(mg/dl):194.84±20.8<br>BMI (kg/m <sup>2</sup> ):<br>34.4±5.45 | <u>IG (n=38):</u><br>glimepiride 2 mg twice<br>daily + L-carnitine 1 gm<br>twice daily<br>vs.<br><u>CG (n=34):</u><br>glimepiride dose 2 mg<br>twice daily<br><u>Duration:</u> 6 months                                  | HbA1c, fasting glucose,<br>PPBG, fasting insulin,<br>extracellular part of<br>insulin regulated<br>aminopeptidase, tumor<br>necrosis factor-alpha,<br>visfatin and lipid panel,<br>BMI and homeostasis<br>model assessment of<br>insulin resistance | Change over 6 months:<br><u>HbA1c (%)</u> :<br>Benefit for IG: 7.41±0.5 vs. 9.5±0.78<br>(p<0.001)<br><u>fasting glucose (mg/dl)</u> :<br>Benefit for IG: 179.6±9.3 vs.<br>192.41±27.4 (p=0.018)                     |
| <b>Matter 2020</b><br>NCT03851055<br><br>RCT   | Egypt,<br>urban,<br>outpatients<br><br>08/2017 to<br>08/2018 | DM, treated with insulin, 10<br>to 18 yrs, transfusion<br>dependent beta-thalassemia<br>major<br><br>no other hemoglobinopathies<br>(e.g. a-thalassemia or sickle<br>thalassemia, disorders that<br>may affect glucose<br>homeostasis other than b-<br>TM, autoimmune diseases,<br>collagen diseases, hypo- or<br>hyperthyroidism, infections,<br>or tumours, or those who<br>were taking any vitamins or<br>food supplements < 1 month<br>before the study and<br>participating in a previous<br>investigational drug<br>study within 3 mo preceding<br>screening | n=80<br>52.5% females<br>age (yrs): 16.3±1.4<br>(range 12-18)<br>fasting glucose<br>(mg/dL): 144.5±22.4                                                 | diet schedule with<br>optimal macronutrient<br>distribution and<br>pharmacologic treatment<br><br><u>IG (n=40):</u><br>zinc gluconate<br>(2x20 mg/d)<br>vs.<br><u>CG (n=40):</u><br>placebo<br><u>Duration:</u> 3 months | <u>Primary:</u> fasting glucose<br><u>Secondary:</u> fructosamine,<br>fasting C-peptide, and<br>HOMA-IR<br><u>safety:</u> any AEs (e.g.<br>nausea, vomiting,<br>abdominal pain, diarrhea,<br>constipation, and<br>reduction of appetite)            | After 12 wks:<br>fasting glucose ( <u>mg/dL</u> ):<br>higher decrease with IG to 116.9±4.6<br>vs. 144.5±22.9 (p<0.001)<br><u>HbA1c (%)</u> :<br>higher in IG (no results reported)<br>no side effects were reported |
| <b>Moustafa</b>                                | Egypt,                                                       | DM2, newly diagnosed                                                                                                                                                                                                                                                                                                                                                                                                                                                                                                                                               | n=62                                                                                                                                                    | <u>IG (n=29, 21 analysed):</u>                                                                                                                                                                                           | Glycemic control,                                                                                                                                                                                                                                   | After 3 months:                                                                                                                                                                                                     |



| Study name<br>registration<br>number<br>Design | Setting<br>Place,<br>setting and<br>time                           | Population<br>Inclusion / Exclusion criteria                                                                                                                                                                                                                                                                           | Characteristics                                                                                                                                                                                                | Intervention vs. Control<br>Description with duration                                                                                                                                                                                 | Outcomes<br>Primary and secondary                                                                                                                           | Results<br>Longest follow-up period with<br>intervention effects (IG vs. CG) with<br>SD, 95%-CI or p value                                                                                                                                                                                                                                                                                                                                                                                                                                                                                                                                                       |
|------------------------------------------------|--------------------------------------------------------------------|------------------------------------------------------------------------------------------------------------------------------------------------------------------------------------------------------------------------------------------------------------------------------------------------------------------------|----------------------------------------------------------------------------------------------------------------------------------------------------------------------------------------------------------------|---------------------------------------------------------------------------------------------------------------------------------------------------------------------------------------------------------------------------------------|-------------------------------------------------------------------------------------------------------------------------------------------------------------|------------------------------------------------------------------------------------------------------------------------------------------------------------------------------------------------------------------------------------------------------------------------------------------------------------------------------------------------------------------------------------------------------------------------------------------------------------------------------------------------------------------------------------------------------------------------------------------------------------------------------------------------------------------|
| <b>2019</b><br><br>RCT                         | urban,<br>outpatients<br><br>recruitment<br>02/2016-<br>03/2018    | (within a time duration ≤6<br>months), 18–60 yrs<br><br>other antidiabetic<br>medications, pregnant and<br>lactating women, major<br>organ dysfunction (hepatic<br>failure, active hepatitis, liver<br>cirrhosis or renal<br>complications), changed their<br>standard medications during<br>the 12 weeks of the study | 72% females<br>HbA1c(%): 7.51±1.4<br>fasting glucose<br>(mg/dl): 154.4±51.6<br>BMI(kg/m <sup>2</sup> ): 33.9±6.1<br>family history of DM<br>(%): 78.5<br>retinopathy/altered<br>vision (%): 53<br>GDM (%): 9.2 | nigella sativa oil capsules<br>(3x 450 mg/d)<br>vs.<br><u>CG (n=33, 23 analysed):</u><br>metformin (2000 mg/d)<br><u>Duration:</u> 3 months                                                                                           | oxidative stress markers,<br>biochemical parameters,<br>weight/BMI/waist<br>circumference, total<br>antioxidant capacity TAC                                | <u>HbA1c (%)</u> :<br>no difference: 7.01±0.83 vs. 6.55±0.72<br><u>fasting glucose (mg/dl)</u> :<br>no difference: 119.8±23.7 vs.<br>120.7±25.4<br><u>Complications</u> :<br>no differences in occurrence of chills,<br>sweating, tachycardia, lethargy/<br>weakness, polydipsia, polyuria, dry<br>skin, polyphagia, blurred vision, foot<br>problems, or tingling/numbness<br>foot problems lower in IG: 4.8% vs.<br>33.3%, (p = 0.025).                                                                                                                                                                                                                        |
| <b>Ragheb 2020</b><br>NCT03437902<br><br>RCT   | Egypt,<br>urban,<br>outpatients<br>care<br><br>02/2019-<br>05/2018 | DM2, receiving standard oral<br>hypoglycemic agents,<br>≥ 35 yrs,<br><br>no history of overt vascular<br>disease, renal or hepatic<br>failure or antioxidant<br>supplementation or insulin<br>therapy, no change of oral<br>hypoglycemic drugs                                                                         | n=70<br>age (yrs): 54.9±8.4<br>70 % females<br>BMI (kg/m <sup>2</sup> ): 32.5±5.7<br>HbA1c(%): 8.50±1.86<br>fasting glucose<br>(mg/dl): 142.8±52.6                                                             | <u>IG2 (n=20):</u><br>Rutin (60) + vitamin C<br>(160 mg) 3x daily vs.<br><u>IG1 (n=20):</u><br>Vitamin C (500 mg) 1x<br>daily<br>vs.<br><u>CG (n=13):</u><br>only usual<br>oral antidiabetic<br>treatment<br><u>Duration:</u> 8 weeks | <u>Primary:</u> HbA1c,<br>oxidative stress marker,<br>antioxidant capacity,<br>insulin resistance, lipid<br>profile<br><u>Secondary:</u><br>Quality of life | After 2 months:<br><u>HbA1c (%)</u> :<br>no difference 7.494 ± 1.72 vs. 8.504 ±<br>2.059 vs. 8.504 ± 2.059 (p=0.1882)<br><u>fasting glucose (mg/dl)</u> :<br>lower in IG2 and CG: 111.3 (IQR 93.3-<br>135.2) vs. 144 (114.8-201) vs. 113.3<br>(94-152.2) (p=0.017)<br><u>Quality of life (SF 36)</u> :<br>• Benefit of physical functioning and<br>energy domains in IG2 vs. CG<br>(p=0.0049, p=0.0253).<br>• Benefit of role limitation to physical<br>health and emotional improved in<br>IG1 vs. CG (p=0.0267, p=0.0280)<br>• no difference between groups in<br>the other domains (emotional well-<br>being, social functioning, pain and<br>general health) |

1  
2  
3  
4  
5  
6  
7  
8  
9  
10  
11  
12  
13  
14  
15  
16  
17  
18  
19  
20  
21  
22  
23  
24  
25  
26  
27  
28  
29  
30  
31  
32  
33  
34  
35  
36  
37  
38  
39  
40  
41  
42  
43  
44  
45  
46

| Study name<br>registration<br>number<br>Design             | Setting<br>Place,<br>setting and<br>time             | Population<br>Inclusion / Exclusion criteria                                                                                                                                                                                                                                                                                                                              | Characteristics                                                                                                                                                                                                                                                        | Intervention vs. Control<br>Description with duration                                                                                                                                                                                                                                           | Outcomes<br>Primary and secondary                                                                                                                                                                                                 | Results<br>Longest follow-up period with<br>intervention effects (IG vs. CG) with<br>SD, 95%-CI or p value                                                                                                                                                                                  |
|------------------------------------------------------------|------------------------------------------------------|---------------------------------------------------------------------------------------------------------------------------------------------------------------------------------------------------------------------------------------------------------------------------------------------------------------------------------------------------------------------------|------------------------------------------------------------------------------------------------------------------------------------------------------------------------------------------------------------------------------------------------------------------------|-------------------------------------------------------------------------------------------------------------------------------------------------------------------------------------------------------------------------------------------------------------------------------------------------|-----------------------------------------------------------------------------------------------------------------------------------------------------------------------------------------------------------------------------------|---------------------------------------------------------------------------------------------------------------------------------------------------------------------------------------------------------------------------------------------------------------------------------------------|
| <b>Rashad 2017</b><br><br>RCT                              | Egypt,<br>urban                                      | DM2, 50-62 yrs<br><br>no insulin medication,<br>allergies, recent thromboses<br>or uncontrollable<br>hypertension                                                                                                                                                                                                                                                         | n=34<br>43.3 % female<br>age (yrs): 55.5±6.15<br>HbA1c (%):6.75±1.2<br>fasting glucose<br>(mmol/l): 8.5±1.4<br>postprandial plasma<br>glucose(mmol/l):<br>15.6±3.3<br>BMI (kg/m <sup>2</sup> ):28.55±4<br>type of diabetes<br>duration of diabetes<br>(yrs): 6.1 ± 2.2 | <u>IG (n=17):</u><br>Balanites aegyptiaca<br>extract (400 mg))<br>vs.<br><u>CG: (n=17)</u><br>placebo capsules (potato<br>maltodextrin)<br><u>Duration: 8 wks</u>                                                                                                                               | glycemic markers, lipid<br>profile, FPG                                                                                                                                                                                           | Change over 8 wks:<br><u>2h postprandial plasma glucose:</u><br>benefit for IG :26.88% decrease vs. CG<br>2.6% increase<br><u>FPG (mmol/l):</u><br>benefit for IG: 7.8 ± 0.9 vs. CG: 8.5 ±<br>1.1                                                                                           |
| <b>Somanah 2012</b><br>NCT01248143<br><br>RCT              | Mauritius,<br>urban/rural<br><br>11/2010-<br>03/2011 | newly diagnosed DM, age 25–<br>60 yrs fasting glucose range:<br>5.1–5.9 mmol/L<br><br>no secondary complications,<br>non-smoker or stopped for ><br>6 months , alcoholic<br>consumption < 2 standard<br>drinks/day, post-menopausal<br>women without hormone<br>replacement treatment, no<br>glucose-lowering,<br>cholesterol-lowering or anti-<br>hypertension treatment | n=127<br>47% female<br>age (yrs): range 25–60<br>HbA1c (%): 5.99±0.4<br>fasting glucose<br>(mg/dL): 93.2±8.0<br>BMI (kg/m <sup>2</sup> ): 26.6 ±<br>3.7                                                                                                                | <u>IG (n=44):</u><br>supplementation of a<br>fermented papaya<br>preparation (6g/d twice<br>daily, over 12 wks),<br>followed by a 2 week<br>wash out period with the<br>same amount of water<br>vs.<br><u>CG (n=56):</u> consumed an<br>equivalent amount of<br>water<br><u>Duration: 14wks</u> | HbA1C fasting glucose,<br>Lipid profile, diet score,<br>blood pressure, alanine<br>aminotransferase;<br>aspartate<br>aminotransferase,<br>Ferritin, c-reactive<br>protein, uric acid,<br>microalbumin/urinary<br>creatinine ratio | After 14 wks:<br><u>HbA1c (%):</u><br>no difference (p=0.448)<br>fasting glucose ( <u>mg/dL</u> ):<br><ul style="list-style-type: none"> <li>remained relatively unchanged in<br/>both genders:</li> <li>males: 96.2±17.0 vs. 87.6±11.7</li> <li>females: 95.6±15.8 vs. 94.3±5.0</li> </ul> |
| <b>Strategies on treatment of DM related complications</b> |                                                      |                                                                                                                                                                                                                                                                                                                                                                           |                                                                                                                                                                                                                                                                        |                                                                                                                                                                                                                                                                                                 |                                                                                                                                                                                                                                   |                                                                                                                                                                                                                                                                                             |

| Study name<br>registration<br>number<br>Design        | Setting<br>Place,<br>setting and<br>time                        | Population<br>Inclusion / Exclusion criteria<br>Characteristics                                                                                                                                                                                                                                                                                                                                                                                                                                                                                                                                                                                                                            | Intervention vs. Control<br>Description with duration                                                                                                                                 | Outcomes<br>Primary and secondary                                                                                                                                                                                                                                                                                                                              | Results<br>Longest follow-up period with<br>intervention effects (IG vs. CG) with<br>SD, 95%-CI or p value      |                                                                                                                                |
|-------------------------------------------------------|-----------------------------------------------------------------|--------------------------------------------------------------------------------------------------------------------------------------------------------------------------------------------------------------------------------------------------------------------------------------------------------------------------------------------------------------------------------------------------------------------------------------------------------------------------------------------------------------------------------------------------------------------------------------------------------------------------------------------------------------------------------------------|---------------------------------------------------------------------------------------------------------------------------------------------------------------------------------------|----------------------------------------------------------------------------------------------------------------------------------------------------------------------------------------------------------------------------------------------------------------------------------------------------------------------------------------------------------------|-----------------------------------------------------------------------------------------------------------------|--------------------------------------------------------------------------------------------------------------------------------|
| <b>EI-Makaky<br/>2020</b><br>NCT03783845<br><br>RCT   | Egypt,<br>urban/rural<br><br>recruited<br>06/2015 to<br>03/2016 | DM2 for >5 yrs, 40-70 yrs,<br>HbA1c 7 to 9% at the last<br>medical evaluation, no<br>change in diabetes treatment<br>over the previous 3 months, ≥<br>6 permanent teeth excluding<br>third molars, clinical<br>attachment level and pocket<br>depth ≥4 mm in >30 % of the<br>sites, diagnosis of chronic<br>periodontitis based on the<br>presence of 4 teeth as a<br>minimum with ≥ 1 site<br><br>Pregnancy, alcoholism and<br>smoking, Presence of any<br>systemic disorders other than<br>hypertension and<br>diabetes, diabetic major<br>complications, antimicrobial<br>therapies or periodontal<br>therapies in the last 6<br>months, allergy to<br>metronidazole and<br>amoxicillin | n=88<br>56.8 % females<br>age (yrs): 52.6±6.8<br>HbA1c (%): 8.16±0.72                                                                                                                 | <u>IG (n=44):</u><br>immediate periodontal<br>therapy: one-stage<br>scaling and root planing,<br>a combination of<br>systemic antibiotics<br>(amoxicillin 500 mg and<br>metronidazole 400 mg<br>3x/day for 2 weeks), and<br>oral hygiene instructions<br>vs.<br><u>CG(n=44):</u><br>delayed periodontal<br>therapy after 3 months<br><u>Duration: 3 months</u> | <u>Primary:</u> HbA1c<br><u>Secondary:</u> not named                                                            | After 3 months:<br><u>HbA1c (%)</u> :<br>benefit for IG: 7.27±0.5 vs. 8.34±0.64:<br>MD -1.07 (-1.32 to -0.83)                  |
| <b>EI-Sharkawy<br/>2016</b><br>NCT02794506<br><br>RCT | Egypt,<br>urban<br><br>06/2014-<br>03/2015.                     | DM2 >5 yrs, >20 teeth,<br>chronic moderate or severe<br>periodontitis with probing<br>depth and clinical attachment<br>level >5 mm, bleeding by<br>probing, on oral<br>hypoglycemic drug therapy<br>> 6 months,<br><br>no smoking, use of                                                                                                                                                                                                                                                                                                                                                                                                                                                  | n=50<br>34% female<br>age (yrs): 50.5 ± 7.4<br>(38 to 63)<br>HbA1c (%): 8.66 ±0.73<br>FPG (mg/dl): 183.5<br>±12.547<br>BMI (kg/m <sup>2</sup> ): 26.9±<br>3.1<br>duration of diabetes | <u>IG (n=24):</u> scaling and<br>root planing (SRP)+<br>400mg oral Propolis once<br>daily<br>vs.<br><u>CG (n=26)</u> scaling and<br>root planing<br>(SRP)+Placebo<br><u>Duration: 6 months</u>                                                                                                                                                                 | <u>Primary:</u> HbA1c<br><u>Secondary:</u> FPG,<br>serum N-(carboxymethyl)<br>lysine, periodontal<br>parameters | after 6 months<br><u>HbA1c (%)</u><br>Benefit for IG 7.75± 0.48 vs.8.5±0.73<br>(p<0.01)<br><u>FPG(mg/dl)</u><br>Benefit for IG |

| Study name<br>registration<br>number<br>Design | Setting<br>Place,<br>setting and<br>time | Population<br>Inclusion / Exclusion criteria                                                                                                                                                                                                                                                                                                                                         | Characteristics                                                                                      | Intervention vs. Control<br>Description with duration                                                                                                                                                                                                               | Outcomes<br>Primary and secondary                                                                             | Results<br>Longest follow-up period with<br>intervention effects (IG vs. CG) with<br>SD, 95%-CI or p value                                                                                                                               |
|------------------------------------------------|------------------------------------------|--------------------------------------------------------------------------------------------------------------------------------------------------------------------------------------------------------------------------------------------------------------------------------------------------------------------------------------------------------------------------------------|------------------------------------------------------------------------------------------------------|---------------------------------------------------------------------------------------------------------------------------------------------------------------------------------------------------------------------------------------------------------------------|---------------------------------------------------------------------------------------------------------------|------------------------------------------------------------------------------------------------------------------------------------------------------------------------------------------------------------------------------------------|
|                                                |                                          | antibiotics, non-steroidal or anti-inflammatory drugs within the last 3 months, periodontal therapy ≤ 1 year, retinopathy grade 3/4, pregnancy, no contraceptive drugs                                                                                                                                                                                                               | (yrs): 8.1 ± 3.9<br>hypertension: 4.5%<br>neuropathy: 1.5%<br>retinopathy: 0.5%<br>nephropathy: 0%   |                                                                                                                                                                                                                                                                     |                                                                                                               |                                                                                                                                                                                                                                          |
| <b>Ghoneim 2013</b><br><br>RCT                 | Egypt,<br><br>03/2010-<br>03/2012        | DM, duration ≥ 15 yrs, bilateral diabetic macular edema (≥ 6 months)<br><br>no prior treatment with intravitreal corticosteroids, peribulbar steroid injection within ≤ 6 months, pars plana vitrectomy, history of glaucoma or steroid induced IOP elevation, ischemic maculopathy, foveal tracted, IOP≥ 23 mmHg                                                                    | n=19 (38 eyes)<br>89.5 % female<br>age (yrs): 52.3±11.4                                              | <u>IG (n=19):</u><br>one eye with 8 mg triamcinolone acetonide vs.<br><u>CG (n=19):</u><br>other eye with 4 mg of triamcinolone acetonide<br><br><u>Duration:</u> 6 months                                                                                          | <u>Primary:</u> Visual acuity<br><u>Others:</u> Intraocular pressure (IOP), IOP lowering drugs, complications | after 6 months:<br><u>Complications:</u><br>• no eyes with retinal detachment, vitreous haemorrhage, intraocular reaction or endophthalmitis.<br>• one eye in IG developed posterior subcapsular cataract.                               |
| <b>Nteleki 2015</b><br><br>RCT                 | South Africa,<br>urban                   | DM2 with neuropathic or mixed (venous and arterial) ulcers; lower extremity ulcer; stable or worsening ulcer that has been present for ≥ 4 weeks<br><br>no acute cellulitis, osteomyelitis, or gangrene, renal, hepatic, hematologic, neurologic, or immune disease not related to diabetes; presence of malignant disease not in remission for > 5 years; use of oral or parenteral | n=7 with 14 lower extremity ulcers<br>85 % male<br>age (yrs): 62<br>duration of diabetes (yrs): 16.7 | standard podiatric management <u>and</u><br><u>IG1 (n=2):</u><br>phototherapy to the regional lymphatic nodes and ulcer(s)<br>vs.<br><u>IG2 (n=3):</u><br>phototherapy on the ulcer<br>vs.<br><u>CG (n=2):</u><br>placebo phototherapy<br><u>Duration:</u> 12 weeks | healing rate (area and perimeter of the ulcer)                                                                | after 3 months:<br><u>Healing:</u><br>• The rate of healing increased in all three groups,<br>• 67% of ulcers received some form of phototherapeutic intervention, 40% of those ulcers resolved completely over 8 weeks<br>no <u>AEs</u> |

| Study name<br>registration<br>number<br>Design            | Setting<br>Place,<br>setting and<br>time                 | Population<br>Inclusion / Exclusion criteria                                                                                                                       | Characteristics                                                                                                                  | Intervention vs. Control<br>Description with duration                                                                                                                                                                                                                                                                                                                   | Outcomes<br>Primary and secondary                                                                                                           | Results<br>Longest follow-up period with<br>intervention effects (IG vs. CG) with<br>SD, 95%-CI or p value                                                                                                                                                                                                                                                                                   |
|-----------------------------------------------------------|----------------------------------------------------------|--------------------------------------------------------------------------------------------------------------------------------------------------------------------|----------------------------------------------------------------------------------------------------------------------------------|-------------------------------------------------------------------------------------------------------------------------------------------------------------------------------------------------------------------------------------------------------------------------------------------------------------------------------------------------------------------------|---------------------------------------------------------------------------------------------------------------------------------------------|----------------------------------------------------------------------------------------------------------------------------------------------------------------------------------------------------------------------------------------------------------------------------------------------------------------------------------------------------------------------------------------------|
|                                                           |                                                          | corticosteroids,<br>immunosuppressive, or<br>cytotoxic agents; known<br>infection with human<br>immunodeficiency virus or<br>presence of AIDS; other leg<br>ulcers |                                                                                                                                  |                                                                                                                                                                                                                                                                                                                                                                         |                                                                                                                                             |                                                                                                                                                                                                                                                                                                                                                                                              |
| <b>Saeed 2013</b><br><br>RCT                              | Egypt,<br>urban<br><br>11/2010-<br>07/2012               | DM, intractable diffuse<br>diabetic macular edema<br>without vitreomacular<br>traction.<br>central foveal thickness $\geq 300$<br>$\mu\text{m}$                    | n= 34 (34 eyes)<br>50% females<br>age (yrs): $55.5 \pm 8.9$<br>duration of diabetes<br>(yrs): $24 \pm 5.4$                       | <u>IG (n=15):</u><br>vitrectomy with removal<br>of the posterior hyaloid,<br>at the end of the<br>procedure injection of<br>intravitreal triamcinolone<br>acetone (IVTA, 0.1 mL,<br>40 mg/mL) +bevacizumab<br>(1.25 mg) +macular grid<br>laser photocoagulation<br>vs.<br><u>CG (n=15):</u><br>same intravitreal<br>injection combination<br><u>Duration:</u> 12 months | <u>primary:</u><br>BCVA, central foveal<br>thickness                                                                                        | Changes over 12 months<br><u>Complications:</u><br>• Changes in BCVA and central foveal<br>thickness at 3, 6, and 12 ( $P < 0.01$ ),<br>better mean BCVA in IG at 12 months.<br>• Better mean <u>central foveal thickness</u> in<br>IG at 12 months.<br><u>Major adverse events:</u><br>development of cataracts (3/15 vs.<br>6/15) and elevation of intraocular<br>pressure (7/15 vs. 2/15) |
| <b>Tsobgny-<br/>Tsague 2018</b><br>NCT02745015<br><br>RCT | Cameroon,<br>urban,<br>tertiary<br>care,<br><br>12/2014- | DM2, >11teeth, severe<br>chronic periodontitis<br>according to the 2012<br>CDC-AAP classification,<br><br>no periodontal treatment,                                | n=34<br>56% female<br>age (yrs): $51.4 \pm 8.8$<br>HbA1c (%): $9.3 \pm 1.3$<br>BMI ( $\text{kg}/\text{m}^2$ ): $28.3 \pm$<br>5.4 | <u>IG (n=17):</u><br>immediate ultrasonic<br>scaling, scaling and root<br>planning +subgingival<br>10% povidone iodine<br>irrigation                                                                                                                                                                                                                                    | <u>Primary:</u> change in HbA1c<br><u>Secondary:</u> Plaque index,<br>gingival bleeding index,<br>pocket depth, clinical<br>attachment loss | Change over 3 months:<br><u>HbA1c (%):</u><br>Benefit with IG: $6.7 \pm 2.0$ % vs. $8.1 \pm$<br>$2.6$ %, MD: 2.2 ( $p=0.029$ )<br><u>adverse events:</u><br>1 /15 patient reported tongue                                                                                                                                                                                                    |

| Study name<br>registration<br>number<br>Design                                                                                                                                                                                                                                                                                                                                                                                                                                                                                                                                                                                                                                                                                                                                                                                               | Setting<br>Place,<br>setting and<br>time   | Population<br>Inclusion / Exclusion criteria<br>Characteristics                                                                                                                                                                                                                                     | Intervention vs. Control<br>Description with duration                                                                                   | Outcomes<br>Primary and secondary                                                                                                                                                                                                                                     | Results<br>Longest follow-up period with<br>intervention effects (IG vs. CG) with<br>SD, 95%-CI or p value                                                                                                                            |
|----------------------------------------------------------------------------------------------------------------------------------------------------------------------------------------------------------------------------------------------------------------------------------------------------------------------------------------------------------------------------------------------------------------------------------------------------------------------------------------------------------------------------------------------------------------------------------------------------------------------------------------------------------------------------------------------------------------------------------------------------------------------------------------------------------------------------------------------|--------------------------------------------|-----------------------------------------------------------------------------------------------------------------------------------------------------------------------------------------------------------------------------------------------------------------------------------------------------|-----------------------------------------------------------------------------------------------------------------------------------------|-----------------------------------------------------------------------------------------------------------------------------------------------------------------------------------------------------------------------------------------------------------------------|---------------------------------------------------------------------------------------------------------------------------------------------------------------------------------------------------------------------------------------|
|                                                                                                                                                                                                                                                                                                                                                                                                                                                                                                                                                                                                                                                                                                                                                                                                                                              | 05/2015                                    | alteration of DM treatment 6 mths prior to the study, onset of systemic diseases or an acute condition, use of immunosuppressive medications or others drugs or presence of conditions able to alter periodontitis clinical features                                                                | duration of diabetes (months): 55.5 ± 42.6 complications: neuropathy (%): 40 nephropathy (%): 7 retinopathy (%): 7 diabetic foot (%): 3 | vs. <u>CG(n=17):</u> periodontal treatment 3 months later <u>Duration: 3 months</u>                                                                                                                                                                                   | irritation following chlorhexidine moth rinse in IG                                                                                                                                                                                   |
| <b>Yakoot 2019</b><br>NCT01531517<br><br>RCT                                                                                                                                                                                                                                                                                                                                                                                                                                                                                                                                                                                                                                                                                                                                                                                                 | Egypt,<br>urban<br><br>07/2011-<br>07/2013 | Adult DM2 or DM1 patients, limb-threatening diabetic foot ulcerations<br><br>no life-threatening extensive gangrenous lesions that needed immediate amputations; bad general condition; shock or unstable vital signs; critically ill with severe organ/system dysfunctions or advanced malignancy. | n=119<br>gender:44.5% female<br>age (yrs): 54.7 ±8.4<br>type of diabetes:<br>▪ DM1: 22.9%<br>▪ DM2: 86.2%                               | conservative debridement of necrotic tissue and irrigation with warm normal saline and <u>IG (n=61):</u> local application of ointment composed of royal jelly and panthenol<br><br>vs. <u>CG (n=58):</u> local application of Panthenol<br><u>duration: 12months</u> | <u>primary:</u> complete healing<br><u>secondary:</u> reduction of infection in the ulcer site, al reaction that may be due to study drug<br><br>after 12 months rate of complete healing (%): Benefit for IG: 32.4% vs. 12%; p=0.034 |
| <p>ADA: American Diabetes Association; BCVA: Best-corrected visual acuity; BMI: Body mass index; CG: Control group; CI: Confidence interval; CHC: Community health centre; DBP: Diastolic blood pressure; DM: diabetes mellitus; DM1: Type 1 diabetes; DM2: type 2 diabetes; FPG: fasting plasma glucose; HbA1c: haemoglobin A1c; IG: intervention group; IQR: interquartile range; n: number of participants; NCD: Non-communicable disease; NPH: neutral protamine Hagedorn; MD: mean difference; MDa: adjusted mean difference; NCD: Non-communicable disease ;RCT: randomized controlled trial; RR: Relative risk; RRa: adjusted relative risk; SAE: Serious adverse events; SBP: Systolic blood pressure; SCI: Diabetes Self-Care Inventory; SD: Standard-deviation; SMBG: self-monitoring of blood glucose; wks: weeks; yrs: years</p> |                                            |                                                                                                                                                                                                                                                                                                     |                                                                                                                                         |                                                                                                                                                                                                                                                                       |                                                                                                                                                                                                                                       |

**Supplementary Table 3:** Characteristics and results of studies on patients with DM2

## RCTs on pregnant DM patients

| Study name<br>registration<br>number<br>Design  | Setting<br>Place,<br>setting and<br>time    | Population<br>Inclusion / Exclusion criteria<br>Characteristics                                                                                                                                                                                                                                                                                                                                                                                                                                                 | Intervention vs.<br>Control<br>Description with<br>duration                                                                                                                                                                                                             | Outcomes<br>Primary and secondary                                                                                                                                                                                                                                                       | Results<br>Longest follow-up period<br>with intervention effects<br>(IG vs. CG) with SD, 95%-<br>CI or p value     | Study name<br>registration number<br>Design                                                                                                                                                                                                        |
|-------------------------------------------------|---------------------------------------------|-----------------------------------------------------------------------------------------------------------------------------------------------------------------------------------------------------------------------------------------------------------------------------------------------------------------------------------------------------------------------------------------------------------------------------------------------------------------------------------------------------------------|-------------------------------------------------------------------------------------------------------------------------------------------------------------------------------------------------------------------------------------------------------------------------|-----------------------------------------------------------------------------------------------------------------------------------------------------------------------------------------------------------------------------------------------------------------------------------------|--------------------------------------------------------------------------------------------------------------------|----------------------------------------------------------------------------------------------------------------------------------------------------------------------------------------------------------------------------------------------------|
| <b>Strategies to increase physical activity</b> |                                             |                                                                                                                                                                                                                                                                                                                                                                                                                                                                                                                 |                                                                                                                                                                                                                                                                         |                                                                                                                                                                                                                                                                                         |                                                                                                                    |                                                                                                                                                                                                                                                    |
| <b>Embaby<br/>2016</b><br><br>RCT               | Egypt,<br>urban,<br><br>07/2014-<br>02/2015 | at increased risk for GDM due<br>to obesity (BMI $\geq$ 30 kg/m <sup>2</sup> ),<br>age: $>$ 25 yrs,<br>20-24th gestational wks,<br>multigravida, physically active<br>with $\geq$ 1 of the following 3<br>characteristics: history of<br>macrosomia, abnormal<br>glucose tolerance during<br>previous pregnancy or first<br>grade relative with DM2<br><br>no hypertension, GDM,<br>medications that affects<br>insulin secretion, serious<br>pulmonary disease, cardiac,<br>renal impairment and<br>malignancy | n=40<br>100% female<br>age (yrs): 29.2 $\pm$ 3.8<br>BMI (kg/m <sup>2</sup> ):28.7 $\pm$ 1.3<br>fasting glucose<br>(mmol/l): 6.5 $\pm$ 0.9<br>fasting insulin (IU/l):<br>15.78 $\pm$ 1.58                                                                                | <u>IG:</u><br>aerobic exercise program<br>(walking on treadmill)<br>three times weekly until<br>the end of 37 wks of<br>gestation + diet control.<br>vs.<br><u>CG:</u><br>diet control with usual<br>care given by<br>obstetricians and<br>midwives.<br><u>Duration:</u> appr. 4 months | Fasting plasma glucose,<br>Insulin level                                                                           | Change to 37 <sup>th</sup> week of gestation:<br><u>FPG (mmol/l)</u><br>Benefit for IG: 4.26 $\pm$ 0.67 vs. 5.07 $\pm$ 0.54<br>(p=0.0001)<br><u>Fasting insulin (IU/l):</u><br>Benefit for IG: 10.59 $\pm$ 1.10 vs.<br>12.43 $\pm$ 1.44 (p=0.0001) |
| <b>Other non-pharmacological therapies</b>      |                                             |                                                                                                                                                                                                                                                                                                                                                                                                                                                                                                                 |                                                                                                                                                                                                                                                                         |                                                                                                                                                                                                                                                                                         |                                                                                                                    |                                                                                                                                                                                                                                                    |
| <b>EI-Shamy<br/>2018</b><br><br>RCT             | Egypt,<br>urban<br><br>12/2016-<br>05/2017  | GDM, age: 20-30 yrs,<br>gestational age: 24-26 wks,<br>BMI $\leq$ 30 kg/m <sup>2</sup> , singleton live<br>fetus<br><br>no high-risk pregnancy, bad<br>obstetric situations or<br>diseases, smoking, oral<br>sedatives                                                                                                                                                                                                                                                                                          | n=30<br>100% female<br>age (yrs): 24.2 $\pm$ 2.8<br>75 g OGTT (mg/dl):<br><ul style="list-style-type: none"> <li>fasting glucose:<br/>129.05<math>\pm</math>0.6</li> <li>2h postprandial:<br/>146<math>\pm</math>1.65</li> </ul> BMI (kg/m <sup>2</sup> ): 27 $\pm$ 1.5 | <u>IG (n=15):</u><br>acupressure + standard<br>antenatal care<br>vs.<br><u>CG (n=15):</u><br>standard antenatal care<br>only<br><u>Duration:</u> 12 weeks                                                                                                                               | Primary:<br>glycemic control,<br>requirement for insulin,<br>insulin resistance<br>Secondary:<br>neonatal outcomes | Change over 3 months:<br>75 g OGTT (mg/dl):<br>Fasting: 116.1 $\pm$ 0.1 vs. 118.2 $\pm$ 0.7<br>2h postprandial:<br>125.3 $\pm$ 1.2 vs. 127.3 $\pm$ 0.9<br>Complication (%):<br>5-min Apgar-Score < 7: 6.7 vs. 6.7 %                                |

|                                                                                                                                                                                        |                                |                                                                              |                                                                                                                                                                                                                                                                                                                                                                              |                                                                                                                                                                                                                                   |                                                                                                                                                                                                                                                                                                                                                                                                                                                                                                                                                                                                                                                                                     |                                                                                                                                                                                                                                                                                                                                                                                                              |                                                                                                                                                                                                                                                                                                                                                                                                                                                                                                                                                                                                                                                                                                                                                                                 |
|----------------------------------------------------------------------------------------------------------------------------------------------------------------------------------------|--------------------------------|------------------------------------------------------------------------------|------------------------------------------------------------------------------------------------------------------------------------------------------------------------------------------------------------------------------------------------------------------------------------------------------------------------------------------------------------------------------|-----------------------------------------------------------------------------------------------------------------------------------------------------------------------------------------------------------------------------------|-------------------------------------------------------------------------------------------------------------------------------------------------------------------------------------------------------------------------------------------------------------------------------------------------------------------------------------------------------------------------------------------------------------------------------------------------------------------------------------------------------------------------------------------------------------------------------------------------------------------------------------------------------------------------------------|--------------------------------------------------------------------------------------------------------------------------------------------------------------------------------------------------------------------------------------------------------------------------------------------------------------------------------------------------------------------------------------------------------------|---------------------------------------------------------------------------------------------------------------------------------------------------------------------------------------------------------------------------------------------------------------------------------------------------------------------------------------------------------------------------------------------------------------------------------------------------------------------------------------------------------------------------------------------------------------------------------------------------------------------------------------------------------------------------------------------------------------------------------------------------------------------------------|
| 1<br>2<br>3<br>4<br>5<br>6<br>7<br>8<br>9<br>10<br>11<br>12<br>13<br>14<br>15                                                                                                          | <b>Utz 2018</b><br>NCT02979756 | Marocco,<br>urban /<br>rural,<br>primary<br>care,<br><br>11/2016-<br>02/2018 | Health centres with $\geq 30$<br>monthly antenatal care<br>consultations and all<br>pregnant women with newly<br>diagnosed GDM<br><br>no DM2, DM1                                                                                                                                                                                                                            | 20 health centres<br>n= 215<br>age (yrs):27.6 $\pm$ 6.6<br>urban (%): 38.5<br>rural (%): 61.5                                                                                                                                     | 20 clinics were<br>randomized $\rightarrow$ 10 in each<br>group<br><u>IG (n=120):</u><br>first screening for<br>GDM $\rightarrow$ positive tested<br>women received<br>counselling on nutrition<br>and exercise<br><u>vs.</u><br><u>CG (n=95):</u><br>routine practice                                                                                                                                                                                                                                                                                                                                                                                                              | Primary: birthweight<br>Secondary: maternal<br>weight gain,<br>glucose control,<br>pregnancy complications.                                                                                                                                                                                                                                                                                                  | Follow-up visits:<br>7.5 $\pm$ 4.9 vs. 3.8 $\pm$ 3.3 (p=0.001)<br><br>FBG within the norm: better with IG<br><1/3 of all values: 7.6 vs. 32.6 %<br>1/3-2/3 of all values: 17.8 vs. 32.6 %<br>>2/3 of all values: 74.6 vs. 34.8 %<br><br>Macrosomia (birthweight>4000 g): 3.5<br>vs. 18.4 % (p<0.001)                                                                                                                                                                                                                                                                                                                                                                                                                                                                            |
| <b>Pharmacological strategies</b>                                                                                                                                                      |                                |                                                                              |                                                                                                                                                                                                                                                                                                                                                                              |                                                                                                                                                                                                                                   |                                                                                                                                                                                                                                                                                                                                                                                                                                                                                                                                                                                                                                                                                     |                                                                                                                                                                                                                                                                                                                                                                                                              |                                                                                                                                                                                                                                                                                                                                                                                                                                                                                                                                                                                                                                                                                                                                                                                 |
| 16<br>17<br>18<br>19<br>20<br>21<br>22<br>23<br>24<br>25<br>26<br>27<br>28<br>29<br>30<br>31<br>32<br>33<br>34<br>35<br>36<br>37<br>38<br>39<br>40<br>41<br>42<br>43<br>44<br>45<br>46 | <b>Ashoush 2016</b><br>RCT     | Egypt,<br>urban,<br>tertiary care<br><br>01/2014-<br>11/2014                 | GDM, mothers with 26–32-<br>week GDM (oral 2-h 75 G<br>glucose tolerance test)<br>singleton pregnancies, failure<br>of satisfactory glycemic<br>control despite adequate diet<br>and exercise for $\geq 1$ wk<br><br>no fetal anomalies on<br>ultrasonography, other<br>pregnancy complications,<br>known intolerance to<br>metformin or risk factors for<br>lactic acidosis | n=95<br>100% female<br>age (yrs): 31.8 $\pm$ 3<br>HbA1c (%): 5.75 $\pm$<br>0.55<br>75g OGTT (mg/dl)<br>• fasting: 106.05 $\pm$ 4.6<br>• 1h:310.25 $\pm$ 11.6<br>• 2h:176.65 $\pm$ 9.4<br>BMI (kg/m <sup>2</sup> ): 31.2 $\pm$ 1.4 | <u>IG (n = 47):</u><br>metformin (initial total<br>dose 1000 mg/d with<br>meals, increase by 500 or<br>850 mg every 1 or 2 wks<br>toward target or up to a<br>maximum dose of<br>2500 mg/d until delivery,<br>addition of insulin if<br>needed)<br><u>vs.</u><br><u>CG (n = 48):</u><br><u>regular insulin + neutral</u><br><u>protamine Hagedorn (3:7)</u><br><u>(starting dose 0.7 units</u><br><u>/kg*d, adjusted to</u><br><u>achieve adequate</u><br><u>glycemic control at</u><br><u>increments of 1</u><br><u>unit/10 mg glucose</u><br><u>higher than the desired</u><br><u>cut-off, short action</u><br><u>insulin whenever needed)</u><br><u>Duration: until delivery</u> | Primary: successful<br>maternal glycemic control<br>Secondary: maternal BMI,<br>glycemic control<br>parameters, maternal<br>weight gained during<br>pregnancy, side effects to<br>metformin, mode of<br>delivery, gestational age<br>at delivery, neonatal<br>birthweight, macrosomia,<br>neonatal hypoglycemia,<br>neonatal death,<br>congenital anomalies,<br>admission to neonatal<br>intensive care unit | Until delivery:<br>fasting glucose during treatment<br>(mg/dl): better with IG:<br>• during the last wk: 78 $\pm$ 3.1 vs. 79.9 $\pm$ 3.7<br>(p=0.008)<br>• during the last 2 wks: 78.9 $\pm$ 3.5 vs.<br>80.8 $\pm$ 4.7 (p=0.029)<br>maternal hypoglycaemia (%):<br>no difference: 6.25 vs. 12.5 (p=0.254)<br>neonatal hypoglycaemia (%):<br>12.8 vs. 14.6 (p=0.791)<br>Maternal weight gain (Kg):<br>4.4 $\pm$ 0.6 vs. 5.1 $\pm$ 0.8 (p=0.001)<br>neonatal congenital anomalies (%):<br>2.1 vs. 2.1 p= 0.747<br>headache (%):<br>27.3 (metformin+insulin) vs. 5.6<br>(metformin monotherapy) vs. 0%<br>(insulin monotherapy)<br>neonatal ICU admission (%):<br>8.5 vs. 10.4 (p= 0.514)<br>Costs (Egyptian pounds): 89.66 $\pm$ 0.96<br>vs. 174.9 $\pm$ 11.1 (for monotherapies) |



|                                                                                                                                                                      |                                                         |                                            |                                                                                                                                                                                                                                                                                                                                                                                                     |                                                                                                                                                                                                                        |                                                                                                                                                                                                                                                                                                                                                                                                                     |                                                                                                                                                                                                                                                                                                                                                                                                                                                                                                 |                                                                                                                                                                                                                                                                                                                                                                                                                                                                                                                                      |
|----------------------------------------------------------------------------------------------------------------------------------------------------------------------|---------------------------------------------------------|--------------------------------------------|-----------------------------------------------------------------------------------------------------------------------------------------------------------------------------------------------------------------------------------------------------------------------------------------------------------------------------------------------------------------------------------------------------|------------------------------------------------------------------------------------------------------------------------------------------------------------------------------------------------------------------------|---------------------------------------------------------------------------------------------------------------------------------------------------------------------------------------------------------------------------------------------------------------------------------------------------------------------------------------------------------------------------------------------------------------------|-------------------------------------------------------------------------------------------------------------------------------------------------------------------------------------------------------------------------------------------------------------------------------------------------------------------------------------------------------------------------------------------------------------------------------------------------------------------------------------------------|--------------------------------------------------------------------------------------------------------------------------------------------------------------------------------------------------------------------------------------------------------------------------------------------------------------------------------------------------------------------------------------------------------------------------------------------------------------------------------------------------------------------------------------|
| 1<br>2<br>3<br>4<br>5<br>6<br>7<br>8<br>9<br>10<br>11<br>12<br>13<br>14<br>15<br>16<br>17<br>18                                                                      | <b>Beyuo 2015</b><br>ACTRN126140<br>00942651<br><br>RCT | Ghana,<br>urban<br><br>01/2013-<br>12/2013 | pregnant women with DM2<br>or GDM (plasma glucose<br>≥7 mmol/l after an overnight<br>fast or plasma glucose<br>concentration ≥11.1 mmol/l 2<br>hours after a 75 g glucose<br>drink), 20-30 wks gestation,<br>age: 18-45yrs, eligible for<br>insulin therapy<br><br>no T1DM, DM2 who have<br>previously failed to achieve<br>glycemic control on<br>metformin monotherapy,<br>allergies to metformin | n= 104<br>100% female<br>age (yrs): 33.3±4.6<br>fasting glucose<br>(mmol/l): 8<br>2HPG (mmol/l): 10.5<br>BMI (kg/m <sup>2</sup> ): 3.1±6.6<br>type of diabetes:<br>GDM (%): 65.9<br>DM2 (%): 34.0                      | <u>IG (n=52):</u><br>Metformin (starting with<br>500 mg / d, gradually<br>increase over 2 wks to a<br>maximum dose of 2500<br>mg/d, insulin was added<br>if necessary)<br>vs.<br><u>CG (n=52):</u><br>insulin treatment (daily<br>dose 0.3 IU/kg, titrated to<br>achieve the glycemic<br>targets, if necessary,<br>admission to the ward<br>and therapy with soluble<br>insulin)<br><u>Duration: until delivery</u> | Primary: 2-hour post<br>prandial blood glucose<br>(2HPG)<br>Secondary: fasting<br>glucose, 1HPG, maternal<br>weight gain, pregnancy<br>outcome and feto-<br>neonatal outcomes.                                                                                                                                                                                                                                                                                                                  | Change from enrolment to delivery:<br>glycemic control (mmol/l):<br>fasting glucose:<br>no difference: 6.42±0.98 vs. 6.62±1.57<br>(p=0.928)<br>1HPG:<br>no difference: 8.95±1.27 vs. 9.62±1.44<br>(p=0.078)<br>2HPG:<br>benefit for IG: 7.84±1.43 vs. 9.05±1.89<br>(p=0.004)                                                                                                                                                                                                                                                         |
| 19<br>20<br>21<br>22<br>23<br>24<br>25<br>26<br>27<br>28<br>29<br>30<br>31<br>32<br>33<br>34<br>35<br>36<br>37<br>38<br>39<br>40<br>41<br>42<br>43<br>44<br>45<br>46 | <b>Ibrahim 2014</b><br>NCT01915550<br><br>RCT           | Egypt,<br>urban<br><br>08/2011-<br>04/2012 | GDM or pre-existing DM,<br>gestational age 20-34 wks<br>with insulin resistance<br>No DM1, secondary diabetes<br>or liver or renal impairment                                                                                                                                                                                                                                                       | n=90<br>100% female<br>age (yrs): 29.8 ± 5.4<br>BMI (kg/m <sup>2</sup> ):31.83 ±<br>3.23<br>Gestational age: 28.7<br>± 3.7 wks<br>GDM: 43.3 %<br>Pre-existing DM:<br>56.7 % with median<br>duration of 4 (1-15)<br>yrs | <u>IG (n=46):</u><br>Metformin (1500 mg,<br>raised to 2000 mg)<br>without increasing insulin<br>dose<br>Patients switched to CG if<br>treatment was not<br>successful to control<br>blood glucose<br>concentrations<br><u>CG (n=44):</u><br>insulin dose was<br>increased according to<br>the standard protocol                                                                                                     | Primary:<br>maternal glycemic control<br>(fasting glucose<br>≤ 95 mg/dl and 2-HPG<br>≤ 120 mg/dl)<br>Secondary:<br>maternal bouts of<br>hypoglycemia, need for<br>another hospital<br>admission for<br>uncontrolled diabetes<br>during pregnancy,<br>gestational age at<br>delivery, mode of<br>delivery, birth weight,<br>birth trauma, congenital<br>anomalies, Apgar score,<br>neonatal hypoglycemia,<br>need for neonatal<br>intensive care unit<br>admission, adverse<br>neonatal outcomes | glycemic control:<br>• better for CG: 76.1 vs. 100 %<br>reached glycemic control (p=0.001)<br>• 13 vs. 18.2 % had readmission for<br>poor glycemic control<br>• 6.5 vs. 22.7 % had bouts of<br>maternal hypoglycaemia<br>Complications:<br>• 23.3 vs. 30.8 % had fetal<br>macrosomia<br>• 1 new-born in each group had<br>congenital malformations<br>• 7 vs. 38.5 % had neonatal<br>hypoglycaemia<br>• 18.6 vs. 41 % had NICU admission<br>• 0 vs. 5.1 % had stillbirths<br>• 11.6 vs. 25.6 % with respiratory<br>distress syndrome |

1  
2  
3  
4  
5  
6  
7  
8  
9  
10  
11  
12  
13  
14  
15  
16  
17  
18  
19  
20  
21  
22  
23  
24  
25  
26  
27  
28  
29  
30  
31  
32  
33  
34  
35  
36  
37  
38  
39  
40  
41  
42  
43  
44  
45  
46

BMI: Body mass index; CG: Control group; CI: Confidence interval; DM: diabetes mellitus; DM2: type 2 diabetes; FPG: fasting plasma glucose; GDM: gestational diabetes; HbA1c: haemoglobin A1c; 1 / 2HPG: 1 / 2-hour post prandial blood glucose; IG: intervention group; n: number of participants; MD: mean difference; MDa: adjusted mean difference; OGTT: Oral glucose tolerance test; RCT: randomized controlled trial; RR: Relative risk; RRa: adjusted relative risk; SD: Standard-deviation; wks: weeks; yrs: years

**Supplementary Table 4:** Characteristics and results of studies on pregnant women with DM

For peer review only

## Risk of bias

| Study            | Sequence generation | Allocation concealment | Blinding of participants/personnel | Blinding of outcome assessors | Incomplete outcome data | Selective outcome reporting | Other risk of bias |
|------------------|---------------------|------------------------|------------------------------------|-------------------------------|-------------------------|-----------------------------|--------------------|
| Abaza 2017       |                     |                        |                                    |                               |                         |                             |                    |
| Abdulrhman 2013  |                     |                        |                                    |                               |                         |                             |                    |
| Adibe 2013       |                     |                        |                                    |                               |                         |                             |                    |
| Adjei 2015       |                     |                        |                                    |                               |                         |                             |                    |
| Ali 2019         |                     |                        |                                    |                               |                         |                             |                    |
| Amendezo 2017    |                     |                        |                                    |                               |                         |                             |                    |
| Anderson 2001    |                     |                        |                                    |                               |                         |                             |                    |
| Anyanwu 2016     |                     |                        |                                    |                               |                         |                             |                    |
| Ashoush 2016     |                     |                        |                                    |                               |                         |                             |                    |
| Asuako 2017      |                     |                        |                                    |                               |                         |                             |                    |
| Beyuo 2015       |                     |                        |                                    |                               |                         |                             |                    |
| Chraibi 2017     |                     |                        |                                    |                               |                         |                             |                    |
| Debussche 2018   |                     |                        |                                    |                               |                         |                             |                    |
| Distiller 2014   |                     |                        |                                    |                               |                         |                             |                    |
| Elbarbary 2016   |                     |                        |                                    |                               |                         |                             |                    |
| Elbarbary 2018   |                     |                        |                                    |                               |                         |                             |                    |
| Elbarbary 2020   |                     |                        |                                    |                               |                         |                             |                    |
| El Gayar 2019    |                     |                        |                                    |                               |                         |                             |                    |
| El-Haggag 2015   |                     |                        |                                    |                               |                         |                             |                    |
| El-Makaky 2020   |                     |                        |                                    |                               |                         |                             |                    |
| El-Shamy 2018    |                     |                        |                                    |                               |                         |                             |                    |
| El-Sharkawy 2016 |                     |                        |                                    |                               |                         |                             |                    |
| El-Sheikh 2019   |                     |                        |                                    |                               |                         |                             |                    |
| Embaby 2016      |                     |                        |                                    |                               |                         |                             |                    |
| Essien 2017      |                     |                        |                                    |                               |                         |                             |                    |
| Fairall 2016     |                     |                        |                                    |                               |                         |                             |                    |
| Fayehun 2018     |                     |                        |                                    |                               |                         |                             |                    |
| Ghoneim 2013     |                     |                        |                                    |                               |                         |                             |                    |
| Hailu 2018       |                     |                        |                                    |                               |                         |                             |                    |
| Ibrahim 2014     |                     |                        |                                    |                               |                         |                             |                    |
| Krawinkel 2018   |                     |                        |                                    |                               |                         |                             |                    |

| Study               | Sequence generation | Allocation concealment | Blinding of participants/personnel | Blinding of outcome assessors | Incomplete outcome data | Selective outcome reporting | Other risk of bias |
|---------------------|---------------------|------------------------|------------------------------------|-------------------------------|-------------------------|-----------------------------|--------------------|
| Labhardt 2011       | 😊                   | 😊                      | 😞                                  | 😊                             | 😊                       | 😊                           | 😊                  |
| Maharaj 2016        | 😊                   | 😊                      | 😞                                  | 😊                             | 😊                       | 😊                           | 😞                  |
| Malek 2015          | 😊                   | 😊                      | 😞                                  | 😊                             | 😊                       | 😊                           | 😊                  |
| Malipa 2013         | 😊                   | 😊                      | 😞                                  | 😞                             | 😊                       | 😊                           | 😞                  |
| Mash 2014           | 😊                   | 😊                      | 😞                                  | 😞                             | 😞                       | 😊                           | 😊                  |
| Matter 2020         | 😊                   | 😊                      | 😊                                  | 😊                             | 😊                       | 😞                           | 😊                  |
| Mohamad 2009        | 😊                   | 😊                      | 😞                                  | 😊                             | 😊                       | 😊                           | 😞                  |
| Moustafa 2019       | 😊                   | 😊                      | 😞                                  | 😊                             | 😞                       | 😊                           | 😞                  |
| Muchiri 2015        | 😊                   | 😊                      | 😞                                  | 😊                             | 😊                       | 😊                           | 😞                  |
| Nteleki 2015        | 😞                   | 😊                      | 😞                                  | 😊                             | 😊                       | 😊                           | 😞                  |
| Owolabi 2019        | 😊                   | 😊                      | 😞                                  | 😊                             | 😊                       | 😞                           | 😞                  |
| Rashad 2017         | 😊                   | 😊                      | 😊                                  | 😊                             | 😞                       | 😊                           | 😞                  |
| Ragheb 2020         | 😊                   | 😊                      | 😞                                  | 😞                             | 😞                       | 😊                           | 😊                  |
| RezkAllah 2019      | 😊                   | 😊                      | 😞                                  | 😊                             | 😊                       | 😊                           | 😊                  |
| Saeed 2013          | 😊                   | 😊                      | 😞                                  | 😞                             | 😞                       | 😊                           | 😞                  |
| Salem 2010          | 😊                   | 😊                      | 😞                                  | 😞                             | 😊                       | 😊                           | 😞                  |
| Sodipo 2017         | 😊                   | 😊                      | 😞                                  | 😊                             | 😞                       | 😊                           | 😊                  |
| Somanah 2012        | 😊                   | 😊                      | 😞                                  | 😊                             | 😞                       | 😞                           | 😞                  |
| Steyn 2013          | 😊                   | 😊                      | 😞                                  | 😊                             | 😞                       | 😊                           | 😊                  |
| Takenga 2014        | 😊                   | 😊                      | 😞                                  | 😊                             | 😊                       | 😊                           | 😞                  |
| Tawfik 2016         | 😊                   | 😊                      | 😊                                  | 😊                             | 😞                       | 😊                           | 😊                  |
| Thuita 2020         | 😊                   | 😊                      | 😞                                  | 😊                             | 😊                       | 😊                           | 😊                  |
| Tsobgny-Tsague 2018 | 😊                   | 😊                      | 😞                                  | 😊                             | 😞                       | 😊                           | 😊                  |
| Utz 2018            | 😊                   | 😊                      | 😞                                  | 😊                             | 😊                       | 😞                           | 😞                  |
| Van der Hoogt 2017  | 😊                   | 😊                      | 😞                                  | 😊                             | 😞                       | 😊                           | 😞                  |
| Van Rooijen 2004    | 😊                   | 😊                      | 😞                                  | 😊                             | 😊                       | 😊                           | 😞                  |
| Webb 2015           | 😊                   | 😊                      | 😊                                  | 😊                             | 😞                       | 😊                           | 😊                  |
| Yakoot 2019         | 😊                   | 😊                      | 😞                                  | 😞                             | 😊                       | 😞                           | 😞                  |
| Yan 2014            | 😊                   | 😊                      | 😞                                  | 😊                             | 😊                       | 😊                           | 😞                  |

😊: low, 😞: unclear, 😞: high risk of bias

Supplementary Table 5: Judgements on risk of bias

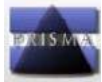

## PRISMA 2020 Checklist

1  
2  
3  
4  
5  
6  
7  
8  
9  
10  
11  
12  
13  
14  
15  
16  
17  
18  
19  
20  
21  
22  
23  
24  
25  
26  
27  
28  
29  
30  
31  
32  
33  
34  
35  
36  
37  
38  
39  
40  
41  
42  
43  
44  
45  
46  
47

| Section and Topic             | Item # | Checklist item                                                                                                                                                                                                                                                                                       | Location where item is reported        |
|-------------------------------|--------|------------------------------------------------------------------------------------------------------------------------------------------------------------------------------------------------------------------------------------------------------------------------------------------------------|----------------------------------------|
| <b>TITLE</b>                  |        |                                                                                                                                                                                                                                                                                                      |                                        |
| Title                         | 1      | Identify the report as a systematic review.                                                                                                                                                                                                                                                          | 1 (Numbers are manuscript pages)       |
| <b>ABSTRACT</b>               |        |                                                                                                                                                                                                                                                                                                      |                                        |
| Abstract                      | 2      | See the PRISMA 2020 for Abstracts checklist.                                                                                                                                                                                                                                                         | 2                                      |
| <b>INTRODUCTION</b>           |        |                                                                                                                                                                                                                                                                                                      |                                        |
| Rationale                     | 3      | Describe the rationale for the review in the context of existing knowledge.                                                                                                                                                                                                                          | 4                                      |
| Objectives                    | 4      | Provide an explicit statement of the objective(s) or question(s) the review addresses.                                                                                                                                                                                                               | 5                                      |
| <b>METHODS</b>                |        |                                                                                                                                                                                                                                                                                                      |                                        |
| Eligibility criteria          | 5      | Specify the inclusion and exclusion criteria for the review and how studies were grouped for the syntheses.                                                                                                                                                                                          | 5                                      |
| Information sources           | 6      | Specify all databases, registers, websites, organisations, reference lists and other sources searched or consulted to identify studies. Specify the date when each source was last searched or consulted.                                                                                            | 6                                      |
| Search strategy               | 7      | Present the full search strategies for all databases, registers and websites, including any filters and limits used.                                                                                                                                                                                 | Supplementary data                     |
| Selection process             | 8      | Specify the methods used to decide whether a study met the inclusion criteria of the review, including how many reviewers screened each record and each report retrieved, whether they worked independently, and if applicable, details of automation tools used in the process.                     | 6                                      |
| Data collection process       | 9      | Specify the methods used to collect data from reports, including how many reviewers collected data from each report, whether they worked independently, any processes for obtaining or confirming data from study investigators, and if applicable, details of automation tools used in the process. | 6-7                                    |
| Data items                    | 10a    | List and define all outcomes for which data were sought. Specify whether all results that were compatible with each outcome domain in each study were sought (e.g. for all measures, time points, analyses), and if not, the methods used to decide which results to collect.                        | 6                                      |
|                               | 10b    | List and define all other variables for which data were sought (e.g. participant and intervention characteristics, funding sources). Describe any assumptions made about any missing or unclear information.                                                                                         | 5-7                                    |
| Study risk of bias assessment | 11     | Specify the methods used to assess risk of bias in the included studies, including details of the tool(s) used, how many reviewers assessed each study and whether they worked independently, and if applicable, details of automation tools used in the process.                                    | 7                                      |
| Effect measures               | 12     | Specify for each outcome the effect measure(s) (e.g. risk ratio, mean difference) used in the synthesis or presentation of results.                                                                                                                                                                  | 7-8                                    |
| Synthesis methods             | 13a    | Describe the processes used to decide which studies were eligible for each synthesis (e.g. tabulating the study intervention characteristics and comparing against the planned groups for each synthesis (item #5)).                                                                                 | 6-7                                    |
|                               | 13b    | Describe any methods required to prepare the data for presentation or synthesis, such as handling of missing summary statistics, or data conversions.                                                                                                                                                | 7                                      |
|                               | 13c    | Describe any methods used to tabulate or visually display results of individual studies and syntheses.                                                                                                                                                                                               | 7                                      |
|                               | 13d    | Describe any methods used to synthesize results and provide a rationale for the choice(s). If meta-analysis was performed, describe the model(s), method(s) to identify the presence and extent of statistical heterogeneity, and software package(s) used.                                          | 7                                      |
|                               | 13e    | Describe any methods used to explore possible causes of heterogeneity among study results (e.g. subgroup analysis, meta-regression).                                                                                                                                                                 | not done due to the narrative approach |

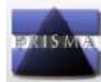

## PRISMA 2020 Checklist

| Section and Topic             | Item # | Checklist item                                                                                                                                                                                                                                                                       | Location where item is reported                                                                                               |
|-------------------------------|--------|--------------------------------------------------------------------------------------------------------------------------------------------------------------------------------------------------------------------------------------------------------------------------------------|-------------------------------------------------------------------------------------------------------------------------------|
|                               | 13f    | Describe any sensitivity analyses conducted to assess robustness of the synthesized results.                                                                                                                                                                                         | not done due to the narrative approach                                                                                        |
| Reporting bias assessment     | 14     | Describe any methods used to assess risk of bias due to missing results in a synthesis (arising from reporting biases).                                                                                                                                                              | Not done due to the narrative approach                                                                                        |
| Certainty assessment          | 15     | Describe any methods used to assess certainty (or confidence) in the body of evidence for an outcome.                                                                                                                                                                                | Not done due to the narrative approach                                                                                        |
| <b>RESULTS</b>                |        |                                                                                                                                                                                                                                                                                      |                                                                                                                               |
| Study selection               | 16a    | Describe the results of the search and selection process, from the number of records identified in the search to the number of studies included in the review, ideally using a flow diagram.                                                                                         | 9                                                                                                                             |
|                               | 16b    | Cite studies that might appear to meet the inclusion criteria, but which were excluded, and explain why they were excluded.                                                                                                                                                          | Supplementary data, list of excluded studies                                                                                  |
| Study characteristics         | 17     | Cite each included study and present its characteristics.                                                                                                                                                                                                                            | 9-16                                                                                                                          |
| Risk of bias in studies       | 18     | Present assessments of risk of bias for each included study.                                                                                                                                                                                                                         | Supplementary Data – Table: Risk of Bias                                                                                      |
| Results of individual studies | 19     | For all outcomes, present, for each study: (a) summary statistics for each group (where appropriate) and (b) an effect estimate and its precision (e.g. confidence/credible interval), ideally using structured tables or plots.                                                     | Supplementary Data – Tables                                                                                                   |
| Results of syntheses          | 20a    | For each synthesis, briefly summarise the characteristics and risk of bias among contributing studies.                                                                                                                                                                               | 11-15                                                                                                                         |
|                               | 20b    | Present results of all statistical syntheses conducted. If meta-analysis was done, present for each the summary estimate and its precision (e.g. confidence/credible interval) and measures of statistical heterogeneity. If comparing groups, describe the direction of the effect. | Figures 3 and 4 in the results section (page 13)                                                                              |
|                               | 20c    | Present results of all investigations of possible causes of heterogeneity among study results.                                                                                                                                                                                       | Page 9 (study designs, participants, settings)<br>Pages 10 – 15 (interventions) narrative description of heterogenous studies |
|                               | 20d    | Present results of all sensitivity analyses conducted to assess the robustness of the synthesized results.                                                                                                                                                                           | Not done due to the narrative approach                                                                                        |

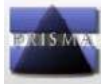

## PRISMA 2020 Checklist

1  
2  
3  
4  
5  
6  
7  
8  
9  
10  
11  
12  
13  
14  
15  
16  
17  
18  
19  
20  
21  
22  
23  
24  
25  
26  
27  
28  
29  
30  
31  
32  
33  
34  
35  
36  
37  
38  
39  
40  
41  
42  
43  
44  
45  
46  
47

| Section and Topic                              | Item # | Checklist item                                                                                                                                                                                                                             | Location where item is reported                                                           |
|------------------------------------------------|--------|--------------------------------------------------------------------------------------------------------------------------------------------------------------------------------------------------------------------------------------------|-------------------------------------------------------------------------------------------|
| Reporting biases                               | 21     | Present assessments of risk of bias due to missing results (arising from reporting biases) for each synthesis assessed.                                                                                                                    | Not done due to the narrative approach                                                    |
| Certainty of evidence                          | 22     | Present assessments of certainty (or confidence) in the body of evidence for each outcome assessed.                                                                                                                                        | Only for HbA1c measures: Figures 3 and 4; others not done due to narrative approach       |
| <b>DISCUSSION</b>                              |        |                                                                                                                                                                                                                                            |                                                                                           |
| Discussion                                     | 23a    | Provide a general interpretation of the results in the context of other evidence.                                                                                                                                                          | 17                                                                                        |
|                                                | 23b    | Discuss any limitations of the evidence included in the review.                                                                                                                                                                            | 21                                                                                        |
|                                                | 23c    | Discuss any limitations of the review processes used.                                                                                                                                                                                      | 21-22                                                                                     |
|                                                | 23d    | Discuss implications of the results for practice, policy, and future research.                                                                                                                                                             | 17-21                                                                                     |
| <b>OTHER INFORMATION</b>                       |        |                                                                                                                                                                                                                                            |                                                                                           |
| Registration and protocol                      | 24a    | Provide registration information for the review, including register name and registration number, or state that the review was not registered.                                                                                             | 8 + abstract                                                                              |
|                                                | 24b    | Indicate where the review protocol can be accessed, or state that a protocol was not prepared.                                                                                                                                             | 8 + abstract                                                                              |
|                                                | 24c    | Describe and explain any amendments to information provided at registration or in the protocol.                                                                                                                                            | 6                                                                                         |
| Support                                        | 25     | Describe sources of financial or non-financial support for the review, and the role of the funders or sponsors in the review.                                                                                                              | 23                                                                                        |
| Competing interests                            | 26     | Declare any competing interests of review authors.                                                                                                                                                                                         | 23                                                                                        |
| Availability of data, code and other materials | 27     | Report which of the following are publicly available and where they can be found: template data collection forms; data extracted from included studies; data used for all analyses; analytic code; any other materials used in the review. | In the supplement: search strategy for 6 databases, list of included and excluded studies |

From: Page MJ, McKenzie JE, Bossuyt PM, Boutron I, Hoffmann TC, Mulrow CD, et al. The PRISMA 2020 statement: an updated guideline for reporting systematic reviews. *BMJ* 2021;372:n71. doi: 10.1136/bmj.n71

For more information, visit: <http://www.prisma-statement.org/>

## Randomized controlled trials on prevention, diagnosis and treatment of diabetes in African countries: a systematic review

Susanne Unverzagt, Angelika S. Sandholzer, Thomas Frese, Yeabsra Mesfinin

### Citation

Susanne Unverzagt, Angelika S. Sandholzer, Thomas Frese, Yeabsra Mesfinin. Randomized controlled trials on prevention, diagnosis and treatment of diabetes in African countries: a systematic review. PROSPERO 2019 CRD42019122785 Available from: [https://www.crd.york.ac.uk/prospéro/display\\_record.php?ID=CRD42019122785](https://www.crd.york.ac.uk/prospéro/display_record.php?ID=CRD42019122785)

### Review question

To summarize available evidence from randomized controlled trials on prevention, diagnosis and treatment of diabetes initiated from African countries.

### Searches

Randomized controlled trials without time or date restriction, in English or German language. Electronic databases: MEDLINE and Cochrane Central Register of Controlled Trials (CENTRAL), registers of ongoing and completed trials ([www.ClinicalTrials.gov](http://www.ClinicalTrials.gov), [apps.who.int/trialsearch](http://apps.who.int/trialsearch)).

Results will be screened by 2 independent authors. Discrepancies will be resolved by discussion between the authors or with a third author.

### Types of study to be included

Randomized controlled trials on prevention, diagnosis and treatment of diabetes.

### Condition or domain being studied

Diabetes mellitus (type 1 and type 2), gestational diabetes.

### Participants/population

African patients in primary, secondary and tertiary prevention, diagnosis and treatment of diabetes.

### Intervention(s), exposure(s)

All preventive, diagnostic and curative interventions on diabetes.

### Comparator(s)/control

Another intervention, or none.

### Main outcome(s)

Primary outcome: all-cause mortality during the longest reported follow-up period (measured from randomisation).

Secondary outcomes: glucose control (HbA1c, insulin resistance, oral glucose tolerance test, fasting serum or plasma glucose), complications, quality of life, hospital admission, treatment adherence (at longest follow-up).

### \* Measures of effect

Within the longest reported follow-up period.

### Additional outcome(s)

Cost.

### \* Measures of effect

Within the longest reported follow-up period.



### Data extraction (selection and coding)

One authors will extract information on study population (diabetes type 1, type 2, gestational diabetes), intervention and outcome by using an assessment form, which will be designed especially for the topic of this review and tested for five studies. A second author will check all extractions, unclear information will be discussed. The data extraction form will include at least the following items: title, author, reference, study design, country, duration, follow-up, indication of patients (primary, secondary, tertiary prevention), sample size per group, description of intervention and control (drugs, devices, strategies), primary and secondary outcomes with results.

### Risk of bias (quality) assessment

Risk of bias will be described and judged on the basis of the Cochrane risk of bias tool in seven specific domains: 1.

Sequence generation (judgement per study) 2. Allocation concealment (judgement per study) 3. Blinding of participants and personnel (judgement per study and outcome) 4. Blinding of outcome assessors (judgement per study and outcome) 5. Incomplete outcome data (judgement per study and outcome) 6. Selective outcome reporting (judgement per study and outcome) 7. Other sources of bias (judgement per study and outcome). We will judge risk of bias domains as 'low', 'high' or 'unclear' and will evaluate individual bias items and present a summary figure to illustrate these findings.

Discrepancies will be resolved by discussion between the authors or with a third author.

### Strategy for data synthesis

We plan a narrative synthesis to get a comprehensive overview on this area of research. We add a meta-analysis with the random-effects model on our primary and secondary outcomes on the basis of aggregated information (Hazard ratio, Relative risks or Odds Ratio) if included studies are sufficiently homogeneous in population, intervention, and outcomes and results show no substantial heterogeneity. We will use the Review Manager for data synthesis.

### Analysis of subgroups or subsets

Study population (diabetes type 1, type 2, gestational diabetes), prevention, diagnosis and treatment type of prevention (primary, secondary and tertiary), type of intervention (drugs, devices, strategies) and regions (northern, eastern, central, southern Africa).

### Contact details for further information

Susanne Unverzagt  
susanne.unverzagt@medizin.uni-halle.de

### Organisational affiliation of the review

Institute of General Practice and Family Medicine, Institute for Medical Epidemiology, Biostatistics and Informatics, Martin-Luther-University Halle-Wittenberg and Independent Department for General Medicine, University of Leipzig

<https://www.medicin.uni-halle.de/index.php?id=7167&L=1%27andchar%28124%29>

### Review team members and their organisational affiliations

Dr Susanne Unverzagt. Institute of General Practice and Family Medicine, Institute of Medical Epidemiology, Biostatistics and Informatics, University Halle / Wittenberg

Angelika S. Sandholzer. MD student, Institute of General Practice and Family Medicine, University Halle / Wittenberg

Professor Thomas Frese. Institute of General Practice and Family Medicine, Institute of Medical Epidemiology, Biostatistics and Informatics, University Halle / Wittenberg

Yeabsra Mesfinin. School of Public Health, Addis Ababa University

### Collaborators

Dr Eva Kantelhardt. Institute of Medical Epidemiology, Biostatistics and Informatics, University Halle / Wittenberg

### Type and method of review

Meta-analysis, Narrative synthesis, Systematic review

### Anticipated or actual start date

15 November 2018

### Anticipated completion date

31 December 2019

### Funding sources/sponsors

DAAD ("Chronic disease health service teaching and research"), project 57216764

### Conflicts of interest

### Language

English

### Country

Ethiopia, Germany

### Stage of review

Review Ongoing

### Subject index terms status

Subject indexing assigned by CRD

### Subject index terms

Africa; Diabetes Mellitus, Type 2; Humans; Randomized Controlled Trials as Topic

### Date of registration in PROSPERO

25 March 2019

### Date of first submission

28 January 2019

### Stage of review at time of this submission

| Stage                                                           | Started | Completed |
|-----------------------------------------------------------------|---------|-----------|
| Preliminary searches                                            | Yes     | No        |
| Piloting of the study selection process                         | Yes     | No        |
| Formal screening of search results against eligibility criteria | Yes     | No        |
| Data extraction                                                 | No      | No        |
| Risk of bias (quality) assessment                               | No      | No        |
| Data analysis                                                   | No      | No        |

*The record owner confirms that the information they have supplied for this submission is accurate and complete and they understand that deliberate provision of inaccurate information or omission of data may be construed as scientific misconduct.*

*The record owner confirms that they will update the status of the review when it is completed and will add publication details in due course.*

**Versions**

25 March 2019  
07 August 2019

**PROSPERO**

This information has been provided by the named contact for this review. CRD has accepted this information in good faith and registered the review in PROSPERO. The registrant confirms that the information supplied for this submission is accurate and complete. CRD bears no responsibility or liability for the content of this registration record, any associated files or external websites.

For peer review only

## Search strategies

### Medline (Ovid)

Search on 19.11.2018, 1470 references, Update from 2018 to Current on 20.08.2020: 541 references

| Nr.       | Searches                                                            |
|-----------|---------------------------------------------------------------------|
| 1.        | exp Diabetes Mellitus/                                              |
| 2.        | Diabetes.tw                                                         |
| <b>3.</b> | <b>or/1-2</b>                                                       |
| 4.        | Africa.tw                                                           |
| 5.        | Exp Africa/                                                         |
| 6.        | Algeria\$.tw or exp Algeria/                                        |
| 7.        | Angol\$.tw or exp Angola/                                           |
| 8.        | Benin\$.tw or exp Benin/                                            |
| 9.        | Botswan\$.tw or exp Botswana/                                       |
| 10.       | Burkina Faso.tw or exp Burkina Faso/                                |
| 11.       | Burund\$.tw or exp Burundi/                                         |
| 12.       | Cameroon\$.tw or exp Cameroon/                                      |
| 13.       | Cape Verde.tw or exp Cape Verde/                                    |
| 14.       | Central African Republic\$.tw or exp Central African Republic/      |
| 15.       | Chad\$.tw or exp Chad/                                              |
| 16.       | Comoros\$.tw or exp Comoros/                                        |
| 17.       | Cote d'Ivoire.tw or exp Cote d'Ivoire/                              |
| 18.       | Democratic Republic of Congo.tw or exp Democratic Republic of Congo |
| 19.       | Djibout\$.tw or exp Djibouti/                                       |
| 20.       | Egypt\$.tw or exp Egypt/                                            |
| 21.       | Equatorial Guinea\$.tw or exp Equatorial Guinea/                    |
| 22.       | Eritrea\$.tw or exp Eritrea/                                        |
| 23.       | Ethiop\$.tw or exp Ethiopia/                                        |
| 24.       | Gabon\$.tw or exp Gabon/                                            |
| 25.       | Gambia\$.tw or exp Gambia/                                          |
| 26.       | Ghana\$.tw or exp Ghana/                                            |
| 27.       | Guinea\$.tw or exp Guinea/                                          |
| 28.       | Guinea-Bissau.tw or exp Guinea-Bissau/                              |
| 29.       | Kenya\$.tw or exp Kenya/                                            |
| 30.       | Lesoth\$.tw or exp Lesotho/                                         |
| 31.       | Liberia\$.tw or exp Liberia/                                        |
| 32.       | Libya\$.tw or exp Libya/                                            |
| 33.       | Madagascar\$.tw or exp Madagascar/                                  |
| 34.       | Malawi\$.tw or exp Malawi/                                          |

| Nr. | Searches                                     |
|-----|----------------------------------------------|
| 35. | Mali.tw or exp Mali/                         |
| 36. | Mauritania\$.tw or exp Mauritania/           |
| 37. | Mauritius\$.tw or exp Mauritius/             |
| 38. | Morocc\$.tw or exp Morocco/                  |
| 39. | Mozambique\$.tw or exp Mozambique/           |
| 40. | Namibia\$.tw or exp Namibia/                 |
| 41. | Niger.tw or exp Niger/                       |
| 42. | Nigeria\$.tw or exp Nigeria/                 |
| 43. | Rwanda\$.tw or exp Rwanda/                   |
| 44. | (Sao Tome and Principe).tw                   |
| 45. | Senegal\$.tw or exp Senegal/                 |
| 46. | Seychell\$.tw                                |
| 47. | Sierra Leone.tw or exp Sierra Leone/         |
| 48. | Somalia\$.tw or exp Somalia/                 |
| 49. | South Africa\$.tw or exp South Africa.de     |
| 50. | South Sudan.tw or exp South Sudan/           |
| 51. | Sudan\$.tw or exp Sudan/                     |
| 52. | Swaziland\$.tw or exp Swaziland/             |
| 53. | Tanzania\$.tw or exp Tanzania/               |
| 54. | Togo\$.tw or exp Togo/                       |
| 55. | Tunisia\$.tw or exp Tunisia/                 |
| 56. | Uganda\$.tw or exp Uganda/                   |
| 57. | Zambia\$.tw or exp Zambia/                   |
| 58. | Zimbabwe\$.tw or exp Zimbabwe/               |
| 59. | Somaliland\$.tw or exp Somaliland/           |
| 60. | Sahrawi Arab Democratic Republic.tw.         |
| 61. | or/4-60                                      |
| 62. | randomized controlled trial.pt.              |
| 63. | controlled clinical trial.pt.                |
| 64. | (randomized or randomised or randomly).ti,ab |
| 65. | placebo.ti,ab.                               |
| 66. | trial.ti,ab.                                 |
| 67. | groups.ti,ab.                                |
| 68. | or/62-67                                     |
| 69. | 3 and 61 and 68                              |
| 70. | exp animals/ not humans.sh.                  |
| 71. | 69 not 70                                    |
| 72. | 71 not (comment or editorial).pt.            |

**CENTRAL**

Search on 14.01.2019, 439 trials, Update from 2018 to Current on 20.08.2020: 244 trials

|    |                                                                                                                       |
|----|-----------------------------------------------------------------------------------------------------------------------|
| 1  | Africa, explode all trees                                                                                             |
| 2  | Algeria* or Angol* or Benin* or Botswan*                                                                              |
| 3  | (Burkina Faso) or Burund* or Cameroon* or (Cape Verde) or (Central African Republic)                                  |
| 4  | Chad* or Comoros* or Cote d'Ivoire or Congo*                                                                          |
| 5  | Djibout* or Egypt* or (Equatorial Guinea*) or Eritrea*                                                                |
| 6  | Ethiop* or Gabon* or Gambia* or Ghana* or Guinea* or Guinea-Bissau                                                    |
| 7  | Kenya* or Lesoth* or Liberia* or Libya* or Madagascar* or Malawi*                                                     |
| 8  | Mali* or Mauritania* or Mauritius* or Morocc* or Mozambique* or Namibia* or Niger*                                    |
| 9  | Nigeria* or Rwanda* or (Sao Tome and Principe) or Senegal* or Seychell*                                               |
| 10 | Sierra Leone or Somalia* or (South Africa) or (South Sudan*) or Sudan* or Swasiland                                   |
| 11 | Tanzania* or Togo* or Tunisia* or Uganda* or Zambia* or Zimbabwe* or Somaliland or (Sahrawi Arab Democratic Republic) |
| 12 | #1 or #2 or #3 or #4 or #5 or #6 or #7 or #8 or #9 or #10 or #11                                                      |
| 13 | MeSH descriptor Diabetes, this term only                                                                              |
| 14 | MESH descriptor Diabetes mellitus, explode all trees                                                                  |
| 15 | Diabetes near 3 gestation*                                                                                            |
| 16 | Latent autoimmune diabetes in adults                                                                                  |
| 17 | Prediabetes                                                                                                           |
| 18 | Insulin resistan*                                                                                                     |
| 20 | HBA1C                                                                                                                 |
| 21 | Diabet* near 3 (angiopath* or foot orfeet or retinopath*)                                                             |
| 22 | Diabet* near 3 (cardiomyopathy* or coma or ketoacido* or neuropath*)                                                  |
| 23 | #13 or #14 or #15 or #16 or #17 or #18 or #19 or #20 or #21                                                           |
| 32 | #12 and #23                                                                                                           |

**CINAHL**

Search on 20.08.2020: 19 results

(Africa\$ or Africa\$ or Algeria\$ or Angol\$ or Benin\$ or Botswan\$ or (Burkina Faso) or Burund\$ or Cameroon\$ or (Cape Verde) or (Central African Republic) or Chad\$ or Comoros\$ or Cote d'Ivoire or Congo\$ Djibout\$ or Egypt\$ or (Equatorial Guinea\$) or Eritrea\$

or Ethiop\$ or Gabon\$ or Gambia\$ or Ghana\$ or Guinea\$ or Guinea-Bissau or Kenya\$ or  
 Lesoth\$ or Liberia\$ or Libya\$ or Madagascar\$ or Malawi\$ or Mali\$ or Mauritania\$ or  
 Mauritius\$ or Morocc\$ or Mozambique\$ or Namibia\$ or Niger\$ or Nigeria\$ or Rwanda\$ or  
 (Sao Tome and Principe) or Senegal\$ or Seychell\$ or Sierra Leone or Somalia\$ or (South  
 Africa) or (South Sudan\$) or Sudan\$ or Swasiland or Tanzania\$ or Togo\$ or Tunisia\$ or  
 Uganda\$ or Zambia\$ or Zimbabwe\$ or Somaliland or (Sahrawi Arab Democratic Republic))

in Abstract

AND

diabetes in Abstract

AND

randomized or rct or randomized in Abstract

AND

In English

AND

Peer-reviewed

And

Humans

### **International Clinical Trials Registry Platform**

Search on 9.-10.10.2019, update on 25.08.2020 (registration January 2019 to 31.08.2020)

<http://apps.who.int/trialsearch/AdvSearch.aspx>

1. Africa or African in the Title and diabetes or diabetic or HbA1c in the condition,  
 Recruitment status: all: 90 records for 90 trials (9.10.2019)
2. diabetes or diabetic or HbA1c in the condition  
 Recruitment status: all  
 Countries of recruitment: Algeria or Angola or Benin or Botswana or Burkina Faso or  
 Burundi or Cameroon or Central African Republic or Chad or Congo or Cite D'ivoire:  
 96 record for 63 trials
3. diabetes or diabetic or HbA1c in the condition  
 Recruitment status: all  
 Countries of recruitment: Democratic Republic of Congo or Djibouti or Egypt or  
 Equatorial Guinea or Eritrea or Ethiopia: 292 records for 159 trials
4. diabetes or diabetic or HbA1c in the condition  
 Recruitment status: all  
 Countries of recruitment: Gabon or Gambia or Ghana or Guinea or Guinea-Bissau or  
 Kenya or Lesotho or Liberia or Lybia: 22 records for 22 trials
5. diabetes or diabetic or HbA1c in the condition

1  
2  
3 Recruitment status: all

4 Countries of recruitment: Madagascar or Malawi or Mali or Mauritania or Mauritius or  
5 Morocco or Mozambique: 96 records for 34 trials

- 6  
7  
8 6. diabetes or diabetic or HbA1c in the condition

9 Recruitment status: all

10 Countries of recruitment: Nigeria: 13 records for 13 trials

- 11  
12  
13 7. diabetes or diabetic or HbA1c in the condition

14 Recruitment status: all

15 Countries of recruitment: Namibia or Niger or Rwanda or (Sao Tome and Principe) or  
16 Senegal or Seychelles or Sierra Leone or Somalia or South Sudan or Sudan or  
17 Swaziland:

18  
19  
20 11 records for 11 trials

- 21  
22 8. diabetes or diabetic or HbA1c in the condition

23 Recruitment status: all

24 Countries of recruitment: South Africa: 1528 records for 429 trials:

- 25  
26  
27 9. diabetes or diabetic or HbA1c in the condition

28 Recruitment status: all

29 Countries of recruitment: Togo or Tunisia or Uganda or Zambia or Zimbabwe: 129  
30 records for 50 trials  
31  
32  
33  
34  
35  
36  
37  
38  
39  
40  
41  
42  
43  
44  
45  
46  
47  
48  
49  
50  
51  
52  
53  
54  
55  
56  
57  
58  
59  
60



## African Journals Online

https://www.ajol.info/index.php/index/search/search?query=%28diabetes+or+diabetic+or+hba1c%29+and+%28random+or+randomized+or+randomised%29&dateFromYear=2004&dateFromMonth=01&dateFromDay=1&dateToYear=2020&dateToMonth=10&dateToDay=14&autohors=

Advanced search 14.10.2020

Titel: (diabetes or diabetic or hba1c) and (random or randomized or randomised)

30 results

## African Index Medicus Database

[http://indexmedicus.afro.who.int/aim/opac\\_css/index.php?lvl=search\\_result&get\\_query=4](http://indexmedicus.afro.who.int/aim/opac_css/index.php?lvl=search_result&get_query=4)

Advanced search 14.10.2020

Titel, Expression booléenne: (diabetes or diabetic or hba1c) and (random or randomized or randomised)

122 results, no potentially eligible references

# 1 List of included and excluded studies

## 1.1 List of included studies

### Abaza 2017

Abaza H, Marschollek M. SMS education for the promotion of diabetes self-management in low & middle income countries: a pilot randomized controlled trial in Egypt. *BMC public health*. 2017;17(1):962.

Abaza H, Marschollek M, Schulze M. SMS Education for the Promotion of Diabetes Self-Management in Low & Middle Income Countries: A Randomized Controlled Trial in Egypt. *Studies in Health Technology & Informatics*. 2017;245:1209.

### Abdulrhman 2013

Abdulrhman MM, El-Hefnawy MH, Aly RH, Shatla RH, Mamdouh RM, Mahmoud DM, et al. Metabolic effects of honey in type 1 diabetes mellitus: a randomized crossover pilot study. *Journal of Medicinal Food*. 2013;16(1):66-72.

### Adibe 2013

Adibe MO, Ukwe CV, Aguwa CN. The Impact of Pharmaceutical Care Intervention on the Quality of Life of Nigerian Patients Receiving Treatment for Type 2 Diabetes. *Value in Health Regional Issues*. 2013;2(2):240-7.

Adibe MO, Aguwa CN, Ukwe CV. Cost-Utility Analysis of Pharmaceutical Care Intervention Versus Usual Care in Management of Nigerian Patients with Type 2 Diabetes. *Value in Health Regional Issues*. 2013;2(2):189-98.

### Adjei 2015

Adjei DN, Agyemang C, Dasah JB, Kuranchie P, Amoah AG. The effect of electronic reminders on risk management among diabetic patients in low resourced settings. *Journal of Diabetes & its Complications*. 2015;29(6):818-21.

### Ali 2019

Ali S, Ghanem Y, Sharaki O, Hewedy W, al. e. The impact of different regimens of vitamin d3 on glucose homeostasis in type 2 diabetic patients. *Asian journal of pharmaceutical and clinical research*. 2019;12(12):21- 6.

### Amendezo 2017

Amendezo E, Walker Timothy D, Karamuka V, Robinson B, Kavabushi P, Ntirenganya C, et al. Effects of a lifestyle education program on glycemic control among patients with diabetes at Kigali University Hospital, Rwanda: A randomized controlled trial. *Diabetes Research & Clinical Practice*. 2017;126:129-37.

### Anderson 2001

1  
2  
3 Anderson RA, Roussel AM, Zouari N, Mahjoub S, Matheau JM, Kerkeni A. Potential  
4 antioxidant effects of zinc and chromium supplementation in people with type 2 diabetes  
5 mellitus. *Journal of the American College of Nutrition*. 2001;20(3):212-8.

#### 8 **Anyanwu 2016**

9 Anyanwu AC, Fasanmade OA, Odeniyi IA, Iwuala S, Coker HB, Ohwovoriole AE. Effect of  
10 Vitamin D supplementation on glycemic control in Type 2 diabetes subjects in Lagos,  
11 Nigeria. *Indian Journal of Endocrinology and Metabolism*. 2016;20(2):189-94.

#### 14 **Ashoush 2016**

15 Ashoush S, El-Said M, Fathi H, Abdelnaby M. Identification of metformin poor responders,  
16 requiring supplemental insulin, during randomization of metformin versus insulin for the  
17 control of gestational diabetes mellitus. *Journal of obstetrics and gynaecology research*.  
18 2016;42(6):640- 7.

#### 22 **Asuako 2017**

23 Asuako B, Moses MO, Eghan BA, Sarpong PA. Fasting plasma glucose and lipid profiles of  
24 diabetic patients improve with aerobic exercise training. *Ghana Medical Journal*.  
25 2017;51(3):120-7.

#### 28 **Beyuo 2015**

29 Beyuo T, Obed SA, Adjepong-Yamoah KK, Bugyei KA, Oppong SA, Marfoh K. Metformin  
30 versus Insulin in the Management of Pre-Gestational Diabetes Mellitus in Pregnancy and  
31 Gestational Diabetes Mellitus at the Korle Bu Teaching Hospital: A Randomized Clinical  
32 Trial. *PLoS ONE [Electronic Resource]*. 2015;10(5):e0125712.

#### 36 **Chraibi 2017**

37 Chraibi A, Al-Herz S, Nguyen BD, Soeatmadji DW, Shinde A, Lakshmivenkataraman B, et al.  
38 An RCT Investigating Patient-Driven Versus Physician-Driven Titration of BIAsp 30 in  
39 Patients with Type 2 Diabetes Uncontrolled Using NPH Insulin. *Diabetes Therapy Research,*  
40 *Treatment and Education of Diabetes and Related Disorders*. 2017;8(4):767-80.

#### 44 **Debussche 2018**

45 Debussche X, Besancon S, Balcou-Debussche M, Ferdynus C, Delisle H, Huiart L, et al.  
46 Structured peer-led diabetes self-management and support in a low-income country: The  
47 ST2EP randomised controlled trial in Mali. *PLoS ONE*. 2018;13(1):e0191262.

#### 51 **Distiller 2014**

52 Distiller LA, Nortje H, Wellmann H, Amod A, Lombard L. A 24-week, prospective,  
53 randomized, open-label, treat-to-target pilot study of obese type 2 diabetes patients with  
54 severe insulin resistance to assess the addition of exenatide on the efficacy of U-500 regular  
55 insulin plus metformin. *Endocrine practice*. 2014;20(11):1143- 50.

#### 58 **El Gayar 2019**

1  
2  
3 El Gayar MH, Aboromia MMM, Ibrahim NA, Abdel Hafiz MH. Effects of ginger powder  
4 supplementation on glycemic status and lipid profile in newly diagnosed obese patients with  
5 type 2 diabetes mellitus. *Obesity medicine*. 2019;14.

6  
7  
8 **El-Haggag 2015**

9 El-Haggag SM, Farrag WF, Kotkata FA. Effect of ketotifen in obese patients with type 2  
10 diabetes mellitus. *Journal of Diabetes & its Complications*. 2015;29(3):427-32.

11  
12  
13 **El-Makaky 2020**

14 El-Makaky Y, Shalaby HK. The effects of non-surgical periodontal therapy on glycemic  
15 control in diabetic patients: a randomized controlled trial. *Oral diseases*. 2020;26:822-9.

16  
17  
18 **El-Shamy 2018**

19 El-Shamy FF, El-Kholy SS, Labib M, Kabel AM. Ameliorative potential of acupressure on  
20 gestational diabetes mellitus: a randomized controlled trial. *Journal of complementary and*  
21 *integrative medicine*. 2018; 16(1).

22  
23  
24 **El-Sheikh 2019**

25 El-Sheikh HM, El-Haggag SM, Elbedewy TA. Comparative study to evaluate the effect of L-  
26 carnitine plus glimepiride versus glimepiride alone on insulin resistance in type 2 diabetic  
27 patients. *Diabetes and metabolic syndrome: clinical research and reviews*. 2019;13(1):167-  
28 73.

29  
30  
31 **El- Sharkawy 2016**

32 El- Sharkawy HM, Anees MM, Van Dyke TE. Propolis improves periodontal status and  
33 glycemic control in patients with type 2 diabetes mellitus and chronic periodontitis: a  
34 randomized clinical trial. *Journal of periodontology*. 2016;87(12):1418-26.

35  
36  
37 **Elbarbary 2016**

38 Elbarbary NS. Effectiveness of the low-glucose suspend feature of insulin pump during  
39 fasting during Ramadan in type 1 diabetes mellitus. *Diabetes/metabolism research and*  
40 *reviews*. 2016;32(6):623- 33.

41  
42  
43 **Elbarbary 2018**

44 Elbarbary NS, Ismail EAR, El-Naggag AR, Hamouda MH, El-Hamamsy M. The effect of 12  
45 weeks carnosine supplementation on renal functional integrity and oxidative stress in  
46 pediatric patients with diabetic nephropathy: a randomized placebo-controlled trial. *Pediatric*  
47 *diabetes*. 2018;19(3):470- 7.

48  
49  
50 **Elbarbary 2020**

51 Elbarbary NS, Ismail EAR, Zaki MA, Darwish YW, Ibrahim MZ, El-Hamamsy M. Vitamin B  
52 complex supplementation as a homocysteine-lowering therapy for early stage diabetic  
53 nephropathy in pediatric patients with type 1 diabetes: A randomized controlled trial. *Clinical*  
54 *Nutrition*. 2020;39(1):49-56.

55  
56  
57 **Embaby 2016**

1  
2  
3 Embaby H, Elsayed E, Fawzy M. Insulin Sensitivity and Plasma Glucose Response to  
4 Aerobic Exercise in Pregnant Women at Risk for Gestational Diabetes Mellitus. Ethiopian  
5 journal of health sciences. 2016;26(5):409- 14.  
6  
7

#### 8 **Essien 2017**

9  
10 Essien O, Otu A, Umoh V, Enang O, Hicks JP, Walley J. Intensive Patient Education  
11 Improves Glycaemic Control in Diabetes Compared to Conventional Education: A  
12 Randomised Controlled Trial in a Nigerian Tertiary Care Hospital. PLoS ONE  
13 2017;12(1):e0168835.  
14  
15

#### 16 **Fairall 2016**

17 Fairall LR, Folb N, Timmerman V, Lombard C, Steyn K, Bachmann MO, et al. Educational  
18 Outreach with an Integrated Clinical Tool for Nurse-Led Non-communicable Chronic Disease  
19 Management in Primary Care in South Africa: a Pragmatic Cluster Randomised Controlled  
20 Trial. Plos medicine. 2016;13(11):e1002178.  
21  
22

#### 23 **Fayehun 2018**

24  
25 Fayehun AF, Olowookere OO, Ogunbode AM, Adetunji AA, Esan A. Walking prescription of  
26 10 000 steps per day in patients with type 2 diabetes mellitus: a randomised trial in Nigerian  
27 general practice. British Journal of General Practice. 2018;68(667):e139-e45.  
28  
29

#### 30 **Ghoneim 2013**

31 Ghoneim EM, Abd El Ghany AA. Behavior of intraocular pressure after intravitreal injection of  
32 triamcinolone acetonide among egyptians. Ophthalmology and Therapy. 2013;2(2):121-30.  
33  
34

#### 35 **Hailu 2018**

36 Hailu FB, Hjortdahl P, Moen A. Nurse-Led Diabetes Self-Management Education Improves  
37 Clinical Parameters in Ethiopia. Frontiers in Public Health. 2018;6:302.  
38  
39

#### 40 **Ibrahim 2014**

41 Ibrahim MI, Hamdy A, Shafik A, Taha S, Anwar M, Faris M. The role of adding metformin in  
42 insulin-resistant diabetic pregnant women: a randomized controlled trial. Archives of  
43 Gynecology & Obstetrics. 2014;289(5):959-65.  
44  
45

#### 46 **Krawinkel 2018**

47 Krawinkel MB, Ludwig C, Swai ME, Yang RY, Chun KP, Habicht SD. Bitter gourd reduces  
48 elevated fasting plasma glucose levels in an intervention study among prediabetics in  
49 Tanzania. Journal of Ethnopharmacology. 2018;216:1-7.  
50  
51

#### 52 **Labhardt 2011**

53 Labhardt ND, Balo JR, Ndam M, Manga E, Stoll B. Improved retention rates with low-cost  
54 interventions in hypertension and diabetes management in a rural African environment of  
55 nurse-led care: a cluster-randomised trial. Tropical Medicine & International Health.  
56 2011;16(10):1276-84.  
57  
58

#### 59 **Maharaj 2016**

60

1  
2  
3 Maharaj SS, Nuhu JM. Rebound exercise: A beneficial adjuvant for sedentary non-insulin-  
4 dependent type 2 diabetic individuals in a rural environment. *Australian Journal of Rural*  
5 *Health*. 2016;24(2):123-9.

#### 6 **Malek 2015**

7  
8  
9 Malek R, Ajili F, Assaad-Khalil SH, Shinde A, Chen JW, Van den Berg E. Similar glucose  
10 control with basal-bolus regimen of insulin detemir plus insulin aspart and thrice-daily  
11 biphasic insulin aspart 30 in insulin-naive patients with type 2 diabetes: Results of a 50-week  
12 randomized clinical trial of stepwise insulin intensification. *Diabetes & Metabolism*.  
13 2015;41(3):223-30.

#### 14 **Marais 2018**

15  
16  
17 Marais C, Hall DR, van Wyk L, Conradie M. Randomized cross-over trial comparing the  
18 diagnosis of gestational diabetes by oral glucose tolerance test and a designed breakfast  
19 glucose profile. *International Journal of Gynaecology & Obstetrics*. 2018;141(1):85-90.

#### 20 **Malipa 2013**

21  
22 Malipa M, Menon J. The relationship between compliance and quality of life among  
23 adolescents with diabetes mellitus type 1. *Medical Journal of Zambia*. 2013;40(3):93-103.

#### 24 **Mash 2014**

25  
26  
27 Mash RJ, Rhode H, Zwarenstein M, Rollnick S, Lombard C, Steyn K, et al. Effectiveness of a  
28 group diabetes education programme in under-served communities in South Africa: a  
29 pragmatic cluster randomized controlled trial. *Diabetic Medicine*. 2014;31(8):987-93.

30  
31  
32 Mash R, Kroukamp R, Gaziano T, Levitt N. Cost-effectiveness of a diabetes group education  
33 program delivered by health promoters with a guiding style in underserved communities in  
34 Cape Town, South Africa. *Patient Education & Counseling*. 2015;98(5):622-6.

#### 35 **Matter 2020**

36  
37  
38 Matter RM, Elbarbary NS, Ismail EAR, Darwish YW, Nada AS, Banoub VP. Zinc  
39 supplementation improves glucose homeostasis in patients with  $\beta^2$ -thalassemia major  
40 complicated with diabetes mellitus: a randomized controlled trial. *Nutrition* 2020;73.

#### 41 **Mohamad 2009**

42  
43  
44 Mohamad RH, Zekry ZK, Al-Mehdar HA, Salama O, El-Shaieb SE, El-Basmy AA, et al.  
45 Camel milk as an adjuvant therapy for the treatment of type 1 diabetes: verification of a  
46 traditional ethnomedical practice. *Journal of Medicinal Food*. 2009;12(2):461-5.

#### 47 **Moustafa 2019**

48  
49  
50 Moustafa HAM, El Wakeel LM, Halawa MR, Sabri NA, El-Bahy AZ, Singab AN. Effect of  
51 *Nigella Sativa* oil versus metformin on glycemic control and biochemical parameters of newly  
52 diagnosed type 2 diabetes mellitus patients. *Endocrine*. 2019;65(2):286- 94.

#### 53 **Muchiri 2016**

1  
2  
3 Muchiri JW, Gericke GJ, Rheeder P. Effect of a nutrition education programme on clinical  
4 status and dietary behaviours of adults with type 2 diabetes in a resource-limited setting in  
5 South Africa: a randomised controlled trial. *Public Health Nutrition*. 2016;19(1):142-55.

6  
7 Muchiri JW, Gericke GJ, Rheeder P. Impact of nutrition education on diabetes knowledge  
8 and attitudes of adults with type 2 diabetes living in a resource-limited setting in South Africa:  
9 a randomised controlled trial. *Journal of Endocrinology, Metabolism and Diabetes of South*  
10 *Africa*. 2016;21(2):26-34.

#### 11 **Nteleki 2015**

12 Nteleki B, Abrahamse H, Houreld NN. Conventional podiatric intervention and phototherapy  
13 in the treatment of diabetic ulcers. *Seminars in Vascular Surgery*. 2015;28(3-4):172-83.

#### 14 **Owolabi 2019**

15 Owolabi EO, Goon DT, Ajayi AI. Efficacy, acceptability and feasibility of daily text-messaging  
16 in promoting glycaemic control and other clinical outcomes in a low-resource setting of South  
17 Africa: A randomised controlled trial. *PLoS ONE* [Electronic Resource].  
18 2019;14(11):e0224791.

19 Owolabi EO, Goon DT, Ajayi AI. Impact of mobile phone text messaging intervention on  
20 adherence among patients with diabetes in a rural setting: A randomized controlled trial.  
21 *Medicine*. 2020;99(12):1-8.

#### 22 **Ragheb 2020**

23 Ragheb SR, El Wakeel LM, Nasr MS, Sabri NA. Impact of Rutin and Vitamin C combination  
24 on oxidative stress and glycemic control in patients with type 2 diabetes. *Clinical nutrition*  
25 *ESPEN*. 2020;35:128-35.

#### 26 **Rashad 2017**

27 Rashad H, Metwally FM, Ezzat SM, Salama MM, Hasheesh A, Abdel Motaal A. Randomized  
28 double-blinded pilot clinical study of the antidiabetic activity of *Balanites aegyptiaca* and  
29 UPLC-ESI-MS/MS identification of its metabolites. *Pharmaceutical Biology*. 2017;55(1):1954-  
30 61.

#### 31 **RezkAllah 2019**

32 RezkAllah SS, Takla MK. Effects of different dosages of interval training on glycemic control  
33 in people with prediabetes: a randomized controlled trial. *Diabetes spectrum*.  
34 2019;32(2):125- 31.

#### 35 **Saeed 2013**

36 Saeed AM. Combined vitrectomy and intravitreal injection versus combined laser and  
37 injection for treatment of intractable diffuse diabetic macular edema. *Clinical Ophthalmology*.  
38 2013;7:283-97.

#### 39 **Salem 2010**

1  
2  
3 Salem MA, Aboelasar MA, Elbarbary NS, Elhilaly RA, Refaat YM. Is exercise a therapeutic  
4 tool for improvement of cardiovascular risk factors in adolescents with type 1 diabetes  
5 mellitus? A randomised controlled trial. *Diabetology & metabolic syndrome*. 2010;2(1):47.

6  
7  
8 **Sodipo 2017**

9 Sodipo OO, Adedokun A, Olusola AA. Effect of self-monitoring of blood glucose on  
10 glycaemic outcome among type 2 diabetic patients. *South african family practice*.  
11 2017;59(6):208- 13.

12  
13  
14 **Somanah 2012**

15 Somanah J, Aruoma OI, Gunness TK, Kowelssur S, Dambala V, Murad F, et al. Effects of a  
16 short term supplementation of a fermented papaya preparation on biomarkers of diabetes  
17 mellitus in a randomized Mauritian population. *Preventive Medicine*. 2012;54 Suppl:S90-7.

18  
19  
20 **Steyn 2013**

21 Steyn K, Lombard C, Gwebushe N, Fourie JM, Everett-Murphy K, Zwarenstein M, et al.  
22 Implementation of national guidelines, incorporated within structured diabetes and  
23 hypertension records at primary level care in Cape Town, South Africa: a randomised  
24 controlled trial. *Glob Health Action*. 2013;6:20796.

25  
26  
27 **Takenga 2014**

28 Takenga C, Berndt RD, Musongya O, Kitero J, Katoke R, Molo K, et al. An ICT-Based  
29 Diabetes Management System Tested for Health Care Delivery in the African Context.  
30 *International Journal of Telemedicine & Applications*. 2014;2014:437307.

31  
32  
33 **Tawfik 2016**

34 Tawfik MY, Mohamed RA. The impact of communicating cardiovascular risk in type 2  
35 diabetics on patient risk perception, diabetes self-care, glycosylated hemoglobin, and  
36 cardiovascular risk. *Journal of public health*. 2016;24(2):153- 64.

37  
38  
39 **Thuita 2020**

40 Thuita AW, Kiage BN, Onyango AN, Makokha AO. Effect of a nutrition education programme  
41 on the metabolic syndrome in type 2 diabetes mellitus patients at a level 5 Hospital in Kenya:  
42 "a randomized controlled trial". *BMC Nutr*. 2020;6:30.

43  
44  
45 **Tsobgny-Tsague 2018**

46 Tsobgny-Tsague NF, Lontchi-Yimagou E, Nana ARN, Tankeu AT, Katte JC, Dehayem MY,  
47 et al. Effects of nonsurgical periodontal treatment on glycated haemoglobin on type 2  
48 diabetes patients (PARODIA 1 study): a randomized controlled trial in a sub-Saharan Africa  
49 population. *BMC Oral Health*. 2018;18(1):28.

50  
51  
52 **Utz 2018**

53 Utz B, Assarag B, Smekens T, Ennassiri H, Lekhal T, El Ansari N, et al. Detection and initial  
54 management of gestational diabetes through primary health care services in Morocco: An  
55 effectiveness-implementation trial. *PloS one*. 2018;13(12):e0209322.



**van der Hoogt 2017**

van der Hoogt M, van Dyk JC, Dolman RC, Pieters M. Protein and fat meal content increase insulin requirement in children with type 1 diabetes - Role of duration of diabetes. *Journal of clinical and translational endocrinology*. 2017;10:15- 21.

**van Rooijen 2004**

van Rooijen AJ, Rheeder P, Eales CJ, Becker PJ. Effect of exercise versus relaxation on haemoglobin A1C in Black females with type 2 diabetes mellitus. *Qjm*. 2004;97(6):343-51.

**Webb 2015**

Webb EM, Rheeder P, Van Zyl DG. Diabetes care and complications in primary care in the Tshwane district of South Africa. *Primary care diabetes*. 2015;9(2):147-54.

Webb EM, Rheeder P, Roux P. Screening in Primary Care for Diabetic Retinopathy, Maculopathy and Visual Loss in South Africa. *Ophthalmologica*. 2016;235(3):141-9.

Webb EM, Rheeder P. A cluster-randomized trial to estimate the effect of mobile screening and treatment feedback on HbA1c and diabetes-related complications in Tshwane primary health care clinics, South Africa. *Primary care diabetes*. 2017;11(6):546-54.

**Yakoot 2019**

Yakoot M, Abdelatif M, Helmy S. Efficacy of a new local limb salvage treatment for limb-threatening diabetic foot wounds-a randomized controlled study. *Diabetes, Metabolic Syndrome and Obesity: Targets and Therapy*. 2019;12:1659.

**Yan 2014**

Yan H, Prista A, Ranadive SM, Damasceno A, Caupers P, Kanaley JA, et al. Effect of Aerobic Training on Glucose Control and Blood Pressure in T2DDM East African Males. *Isrn Endocrinology Print*. 2014;2014:864897.

## 1.2 List of excluded studies

### 1.2.1 Other design (28 references)

1. Abd El Hameed AA, Shreif HE, Mowafy HE. The role of continuing metformin therapy during pregnancy in the reduction of gestational diabetes and improving pregnancy outcomes in women with polycystic ovary syndrome. *Middle east fertility society journal*. 2011;16(3):204- 8.
2. Abdelaziz TS, Sadek KM. Effect of reducing medication regimen complexity on glycaemic control in patients with diabetes. *Romanian Journal of Internal Medicine*. 2019;57(1):23-9.
3. Agboola-Abu CF, Ohwovoriole AE, Akinlade KS. The effect of oral hypoglycaemic agents on dyslipidaemia in Nigerian patients with newly diagnosed non-insulin dependent diabetes mellitus--a prospective study. *West African Journal of Medicine*. 2000;19(2):126-31.
4. Assah FK, Atanga EN, Enoru S, Sobngwi E, Mbanya JC. Community-based peer support significantly improves metabolic control in people with Type 2 diabetes in Yaounde, Cameroon. *Diabetic Medicine*. 2015;32(7):886-9.
5. Bahramikia S, Yazdanparast R. Phytochemistry and medicinal properties of *Teucrium polium* L. (Lamiaceae). *Phytotherapy Research*. 2012;26(11):1581-93.
6. Bailey CJ, Iqbal N, T'Joel C, List JF. Dapagliflozin monotherapy in drug-naive patients with diabetes: a randomized-controlled trial of low-dose range. *Diabetes, Obesity & Metabolism*. 2012;14(10):951-9.
7. Bekkouche L, Bouchenak M, Malaisse WJ, Yahia DA. The Mediterranean diet adoption improves metabolic, oxidative, and inflammatory abnormalities in Algerian metabolic syndrome patients. *Hormon- und Stoffwechselforschung / Hormones et métabolisme [Hormone and metabolic research]*. 2014;46(4):274- 82.
8. Bello SI, Ganiyu KA, Dakop YO, Erah PO. Pharmacist's intervention in the control of blood sugar levels in randomised diabetes patients at a primary health care setting in Benin City. *Nigerian Quarterly Journal of Hospital Medicine*. 2012;22(4):245-8.
9. Brown J, Martis R, Hughes B, Rowan J, Crowther CA. Oral anti-diabetic pharmacological therapies for the treatment of women with gestational diabetes. *Cochrane Database of Systematic Reviews*. 2017;1:CD011967.
10. Chou HS, Truitt KE, Moberly JB, Merante D, Choi Y, Mun Y, et al. A 26-week, placebo- and pioglitazone-controlled monotherapy study of rivoglitazone in subjects with type 2 diabetes mellitus. *Diabetes, Obesity & Metabolism*. 2012;14(11):1000-9.
11. De Caterina R, Andersson U, Alexander JH, Al-Khatib SM, Bahit MC, Goto S, et al. History of bleeding and outcomes with apixaban versus warfarin in patients with atrial fibrillation in the Apixaban for Reduction in Stroke and Other Thromboembolic Events in Atrial Fibrillation trial. *American Heart Journal*. 2016;175:175-83.

12. De Luca G, Michael Gibson C, Bellandi F, Murphy S, Maioli M, Noc M, et al. Benefits of pharmacological facilitation with glycoprotein IIb-IIIa inhibitors in diabetic patients undergoing primary angioplasty for STEMI. A subanalysis of the EGYPT cooperation. *Journal of Thrombosis & Thrombolysis*. 2009;28(3):288-98.
13. El-Fattah AAA, Hamed MI, Sadek SE, Abu-Elhana AS. Insulin resistance in type II diabetes mellitus with liver cirrhosis. *Global journal of pharmacology*. 2013;7(2):109- 17.
14. Fullerton B, Siebenhofer A, Jeitler K, Horvath K, Semlitsch T, Berghold A, et al. Short-acting insulin analogues versus regular human insulin for adults with type 1 diabetes mellitus. *Cochrane Database of Systematic Reviews*. 2016(6):CD012161.
15. Gessler N, Labhard ND, Stolt P, Manga E, Balo JR, Boffolo A, et al. The lesson of Monsieur Nouma: effects of a culturally sensitive communication tool to improve health-seeking behavior in rural Cameroon. *Patient Education & Counseling*. 2012;87(3):343-50.
16. Ibrahim MA, Sarhan, II, Halawa MR, Afify EN, Hebah HA, Al-Gohary EA, et al. Study of the effect of vitamin D supplementation on glycemic control in type 2 diabetic prevalent hemodialysis patients. *Hemodialysis international*. 2015;19:S11- S9.
17. Jingi AM, Noubiap JJ, Essouma M, Bigna JJ, Nansseu JR, Ellong A, et al. Association of insulin treatment versus oral hypoglycaemic agents with diabetic retinopathy and its severity in type 2 diabetes patients in Cameroon, sub-Saharan Africa. *Annals of Translational Medicine*. 2016;4(20):395.
18. Kadiri A, Al-Nakhi A, El-Ghazali S, Jabbar A, Al Arouj M, Akram J, et al. Treatment of type 1 diabetes with insulin lispro during Ramadan. *Diabetes & metabolism*. 2001;27(4 Pt 1):482- 6.
19. Kamau RK, Maina FW, Kigundu C, Mati JK. The effect of low-oestrogen combined pill, progestogen-only pill and medroxyprogesterone acetate on oral glucose tolerance test. *East African Medical Journal*. 1990;67(8):550-5.
20. Moghazy AM, Shams ME, Adly OA, Abbas AH, El-Badawy MA, Elsakka DM, et al. The clinical and cost effectiveness of bee honey dressing in the treatment of diabetic foot ulcers. *Diabetes Research & Clinical Practice*. 2010;89(3):276-81.
21. Notelovitz M. Sulphonylurea therapy in the treatment of the pregnant diabetic. *South African Medical Journal Suid-Afrikaanse Tydskrif Vir Geneeskunde*. 1971;45(9):226-9.
22. Osman H, Khamis O, Elfeky M, El Amin Ali A, Abdelwahed M. Effect of short-term erythropoietin therapy on insulin resistance and serum levels of leptin and neuropeptide y in hemodialysis patients. *Indian journal of endocrinology and metabolism*. 2017;21(5):724- 30.
23. Razak A, Isaacs AA. Implementation and evaluation of a weight-reduction programme for diabetic patients at a primary health care facility in the western cape: a pilot study. *South african family practice*. 2017;59(6):189- 94.

- 1  
2  
3 24. Schumm-Draeger PM, Burgess L, Koranyi L, Hrubá V, Hamer-Maansson JE, de Bruin  
4 TW. Twice-daily dapagliflozin co-administered with metformin in type 2 diabetes: a 16-week  
5 randomized, placebo-controlled clinical trial. *Diabetes, Obesity & Metabolism*. 2015;17(1):42-  
6 51.  
7  
8  
9 25. Speechly DP, Buffenstein R. Appetite dysfunction in obese males: evidence for role of  
10 hyperinsulinaemia in passive overconsumption with a high fat diet. *European journal of*  
11 *clinical nutrition*. 2000;54(3):225- 33.  
12  
13 26. Todowede OO, Sartorius B. Prevalence of metabolic syndrome, discrete or comorbid  
14 diabetes and hypertension in sub-Saharan Africa among people living with HIV versus HIV-  
15 negative populations: a systematic review and meta-analysis protocol. *BMJ Open*.  
16 2017;7(7):e016602.  
17  
18 27. Van Olmen J, Van Pelt M, Malombo B, Ku GM, Kanda D, Heang H, et al. Process  
19 evaluation of a mobile health intervention for people with diabetes in low income countries -  
20 the implementation of the TEXT4DSM study. *Journal of Telemedicine & Telecare*.  
21 2017;23(1):96-105.  
22  
23 28. Werfalli M, Raubenheimer P, Engel M, Peer N, Kalula S, Kengne AP, et al.  
24 Effectiveness of community-based peer-led diabetes self-management programmes (COMP-  
25 DSMP) for improving clinical outcomes and quality of life of adults with diabetes in primary  
26 care settings in low and middle-income countries (LMIC): a systematic review and meta-  
27 analysis. *BMJ Open*. 2015;5(7):e007635.  
28  
29  
30  
31  
32  
33  
34

### 35 **1.2.2 Other population (32 references)**

- 36 1. Ali Hassan H, El-Gezeiry D, Nafaa TM, Baghdady I. Improved responsiveness of  
37 PCOS patients to clomiphene after CYP17a inhibitor. *Journal of assisted reproduction and*  
38 *genetics*. 2001;18(11):608- 11.  
39  
40 2. Amador-Licona N, Guízar-Mendoza J, Vargas E, Sánchez-Camargo G, Zamora-Mata  
41 L. The short-term effect of a switch from glibenclamide to metformin on blood pressure and  
42 microalbuminuria in patients with type 2 diabetes mellitus. *Archives of medical research*.  
43 2000;31(6):571- 5.  
44  
45 3. Ashoush S, Abou-Gamrah A, Bayoumy H, Othman N. Chromium picolinate reduces  
46 insulin resistance in polycystic ovary syndrome: randomized controlled trial. *Journal of*  
47 *obstetrics and gynaecology research*. 2016;42(3):279- 85.  
48  
49 4. Ashtary-Larky D, Ghanavati M, Lamuchi-Deli N, Payami SA, Alavi-Rad S,  
50 Boustaninejad M, et al. Rapid Weight Loss vs. slow weight loss: which is more effective on  
51 body composition and metabolic risk factors? *International journal of endocrinology and*  
52 *metabolism*. 2017;15(3) (no pagination).  
53  
54  
55  
56  
57  
58  
59  
60

- 1  
2  
3 5. 6. Bashandy GMN, Boules NS, Taha FM. Effects of a single preoperative dose of  
4 N(2)-L-alanyl-L-glutamine on insulin resistance and plasma glutathione levels in the early  
5 postoperative period. *Egyptian journal of anaesthesia*. 2013;29(4):319- 24.
- 6  
7 6. Bays HE, Evans JL, Maki KC, Evans M, Maquet V, Cooper R, et al. Chitin-glucan  
8 fiber effects on oxidized low-density lipoprotein: a randomized controlled trial. *European*  
9 *Journal of Clinical Nutrition*. 2013;67(1):2-7.
- 10  
11 7. Belinova L, Kahleova H, Malinska H, Topolcan O, Windrichova J, Oliyarnyk O, et al.  
12 The effect of meal frequency in a reduced-energy regimen on the gastrointestinal and  
13 appetite hormones in patients with type 2 diabetes: a randomised crossover study. *Plos one*.  
14 2017;12(4):e0174820.
- 15  
16 8. Campbell-Tofte JI, Mølgaard P, Josefsen K, Abdallah Z, Hansen SH, Cornett C, et al.  
17 Randomized and double-blinded pilot clinical study of the safety and anti-diabetic efficacy of  
18 the Rauwolfia-Citrus tea, as used in Nigerian traditional medicine. *Journal of*  
19 *ethnopharmacology*. 2011;133(2):402- 11.10.
- 20  
21 9. El-Haggag SM, Mostafa TM. Comparative clinical study between the effect of  
22 fenofibrate alone and its combination with pentoxifylline on biochemical parameters and liver  
23 stiffness in patients with non-alcoholic fatty liver disease. *Hepatology international*.  
24 2015;9(3):471- 9.
- 25  
26 10. Gupta V, Keshari BB, Tiwari SK, Murthy K. A comparative study of Shilajatu and  
27 Asanadi Ghana Vati in the management of Madhumeha w.s.r. to type-2 diabetes mellitus.  
28 *Ayu*. 2016;37(2):120-4.
- 29  
30 11. Hashim HA, Lakany NE, Sherief L. Combined metformin and clomiphene citrate  
31 versus laparoscopic ovarian diathermy for ovulation induction in clomiphene-resistant women  
32 with polycystic ovary syndrome: a randomized controlled trial. *Journal of obstetrics and*  
33 *gynaecology research*. 2011;37(3):169- 77.
- 34  
35 12. Home PD, Bolli GB, Mathieu C, Deerochanawong C, Landgraf W, Candelas C, et al.  
36 Modulation of insulin dose titration using a hypoglycaemia-sensitive algorithm: insulin  
37 glargine versus neutral protamine Hagedorn insulin in insulin-naive people with type 2  
38 diabetes. *Diabetes, Obesity & Metabolism*. 2015;17(1):15-22.
- 39  
40 13. Ismail NA, Ragab S, Abd El Baky ANE, Hamed M, Ibrahim ASA. Effect of oral  
41 curcumin administration on insulin resistance, serum resistin and fetuin-A in obese children:  
42 randomized placebo-controlled study. *Research journal of pharmaceutical, biological and*  
43 *chemical sciences*. 2014;5(1):887- 96.
- 44  
45 14. Kumari J, Mehta CS, Shukla VD, Dave AR, Shingala TM. A comparative clinical study  
46 of Nyagrodhadi Ghanavati and Virechana Karma in the management of Madhumeha. *Ayu*.  
47 2010;31(3):300-4.
- 48  
49  
50  
51  
52  
53  
54  
55  
56  
57  
58  
59  
60

15. Malin SK, Hinnerichs KR, Echtenkamp BG, Evetovich TK, Engebretsen BJ. Effect of adiposity on insulin action after acute and chronic resistance exercise in non-diabetic women. *European journal of applied physiology*. 2013;113(12):2933- 41.
16. Malin SK, Kullman EL, Scelsi AR, Haus JM, Filion J, Pagadala MR, et al. A whole-grain diet reduces peripheral insulin resistance and improves glucose kinetics in obese adults: a randomized-controlled trial. *Metabolism: clinical and experimental*. 2018;82:111- 7.
17. Malin SK, Niemi N, Solomon TP, Haus JM, Kelly KR, Filion J, et al. Exercise training with weight loss and either a high- or low-glycemic index diet reduces metabolic syndrome severity in older adults. *Annals of nutrition & metabolism*. 2012;61(2):135- 41.
18. Manaf A, Tjandrawinata RR, Malinda D. Insulin sensitizer in prediabetes: a clinical study with DLBS3233, a combined bioactive fraction of *Cinnamomum burmanii* and *Lagerstroemia speciosa*. *Drug design, development and therapy*. 2016;10:1279- 89.
19. Mendez-Del Villar M, Gonzalez-Ortiz M, Martinez-Abundis E, Perez-Rubio KG, Cortez-Navarrete M. Effect of *Irvingia gabonensis* on Metabolic Syndrome, Insulin Sensitivity, and Insulin Secretion. *Journal of Medicinal Food*. 2018;21(6):568-74.
20. Mogharnasi M, TaheriChadorneshin H, Papoli-Baravati SA, Teymuri A. Effects of upper-body resistance exercise training on serum nesfatin-1 level, insulin resistance, and body composition in obese paraplegic men. *Disability and health journal*. 2018;(no pagination).
21. Nadkarni MA, Vyas SN, Baghel MS, Ravishankar B. Randomized placebo-controlled trial of Mustadi Ghanavati in hyperlipidemia. *Ayu*. 2010;31(3):287-93.
22. Ngo-Matip ME, Pieme CA, Azabji-Kenfack M, Biapa PC, Germaine N, Heike E, et al. Effects of *Spirulina platensis* supplementation on lipid profile in HIV-infected antiretroviral naïve patients in Yaounde-Cameroon: a randomized trial study. *Lipids in health and disease*. 2014;13:191.
23. Ngondi JL, Etoundi BC, Nyangono CB, Mbofung CM, Oben JE. IGOB131, a novel seed extract of the West African plant *Irvingia gabonensis*, significantly reduces body weight and improves metabolic parameters in overweight humans in a randomized double-blind placebo controlled investigation. *Lipids in health and disease*. 2009;8:7.
24. Philis-Tsimikas A, Del Prato S, Satman I, Bhargava A, Dharmalingam M, Skjoth TV, et al. Effect of insulin degludec versus sitagliptin in patients with type 2 diabetes uncontrolled on oral antidiabetic agents. *Diabetes, Obesity & Metabolism*. 2013;15(8):760-6.
25. Pieber TR, Treichel HC, Hompesch B, Philotheou A, Mordhorst L, Gall MA, et al. Comparison of insulin detemir and insulin glargine in subjects with Type 1 diabetes using intensive insulin therapy. *Diabetic Medicine*. 2007;24(6):635-42.

- 1  
2  
3 26. Rizk AY, Bedaiwy MA, Al-Inany HG. N-acetyl-cysteine is a novel adjuvant to  
4 clomiphene citrate in clomiphene citrate-resistant patients with polycystic ovary syndrome.  
5 *Fertility and sterility*. 2005;83(2):367- 70.  
6  
7  
8 27. Rost NS, Giugliano RP, Ruff CT, Murphy SA, Crompton AE, Norden AD, et al.  
9 Outcomes With Edoxaban Versus Warfarin in Patients With Previous Cerebrovascular  
10 Events: Findings From ENGAGE AF-TIMI 48 (Effective Anticoagulation With Factor Xa Next  
11 Generation in Atrial Fibrillation-Thrombolysis in Myocardial Infarction 48). *Stroke*.  
12 2016;47(8):2075-82.  
13  
14 28. Shabana W, Teleb M, Dawod T, Abu Taha H, Abdulla A, Shahin A, et al. Outcome of  
15 alpha-blockers, with or without methylprednisolone combination, in medical expulsive therapy  
16 for lower ureteric stones: a prospective randomised study. *Arab journal of urology*.  
17 2016;14(1):7- 11.  
18  
19 29. Strojek K, Yoon KH, Hrubá V, Sugg J, Langkilde AM, Parikh S. Dapagliflozin Added  
20 to Glimpiride in Patients with Type 2 Diabetes Mellitus Sustains Glycemic Control and  
21 Weight Loss Over 48 Weeks: a Randomized, Double-Blind, Parallel-Group, Placebo-  
22 Controlled Trial. *Diabetes therapy*. 2014;5(1):267- 83.  
23  
24 30. Timmers S, De Ligt M, Phielix E, Van De Weijer T, Hansen J, Moonen-Kornips E, et  
25 al. Resveratrol as add-on therapy in subjects with well-controlled type 2 diabetes: a  
26 randomized controlled trial. *Diabetes care*. 2016;39(12):2211- 7.  
27  
28 31. Van Olmen J, Kegels G, Korachais C, de Man J, Van Acker K, Kalobu JC, et al. The  
29 effect of text message support on diabetes self-management in developing countries - A  
30 randomised trial. *Journal of Clinical & Translational Endocrinology*. 2017;7:33-41.  
31  
32 32. Vázquez C, Botella-Carretero JI, Corella D, Fiol M, Lage M, Lurbe E, et al. White fish  
33 reduces cardiovascular risk factors in patients with metabolic syndrome: the WISH-CARE  
34 study, a multicenter randomized clinical trial. *Nutrition, metabolism, and cardiovascular  
35 diseases : NMCD*. 2014;24(3):328- 35.

### 1.2.3 Other intervention (8 references)

- 36  
37  
38  
39  
40  
41  
42  
43  
44  
45 1. Babiker R, Elmusharaf K, Keogh MB, Saeed AM. Effect of Gum Arabic (Acacia  
46 Senegal) supplementation on visceral adiposity index (VAI) and blood pressure in patients  
47 with type 2 diabetes mellitus as indicators of cardiovascular disease (CVD): a randomized  
48 and placebo-controlled clinical trial. *Lipids in Health & Disease*. 2018;17(1):56.  
49  
50 2. Dirajlal-Fargo S, Musiime V, Cook A, Mirembe G, Kenny J, Jiang Y, et al. Insulin  
51 Resistance and Markers of Inflammation in HIV-infected Ugandan Children in the CHAPAS-3  
52 Trial. *Pediatric infectious disease journal*. 2017;36(8):761- 7.  
53  
54 3. Djoumessi RN, Noubiap JJ, Kaze FF, Essouma M, Menanga AP, Kengne AP, et al.  
55 Effect of low-dose spironolactone on resistant hypertension in type 2 diabetes mellitus: a  
56  
57  
58  
59  
60

1  
2  
3 randomized controlled trial in a sub-Saharan African population. *BMC Research Notes*.  
4 2016;9:187.

5  
6 4. Elnashar A, Fahmy M, Mansour A, Ibrahim K. N-acetyl cysteine vs. metformin in  
7 treatment of clomiphene citrate-resistant polycystic ovary syndrome: a prospective  
8 randomized controlled study. *Fertility and sterility*. 2007;88(2):406- 9.

9  
10 5. Elseddek M-EA, Elgindy E. Comparison between two clomiphene citrate protocols for  
11 induction of ovulation in clomiphene resistant polycystic ovary syndrome. *Middle east fertility*  
12 *society journal*. 2014;19(4):243- 7.

13  
14 6. Gopalan A, Paramanund J, Shaw PA, Patel D, Friedman J, Brophy C, et al.  
15 Randomised controlled trial of alternative messages to increase enrolment in a healthy food  
16 programme among individuals with diabetes. *BMJ Open*. 2016;6(11):e012009.

17  
18 7. Onyechi KC, Eseadi C, Okere AU, Onuigbo LN, Umoke PC, Anyaegbunam NJ, et al.  
19 Effects of cognitive behavioral coaching on depressive symptoms in a sample of type 2  
20 diabetic inpatients in Nigeria. *Medicine*. 2016;95(31):e4444.

21  
22 8. Shehata M, Hamza M. Impact of high loading dose of atorvastatin in diabetic patients  
23 with renal dysfunction undergoing elective percutaneous coronary intervention: a randomized  
24 controlled trial. *Cardiovascular therapeutics*. 2015;33(2):35-41.

#### 25 **1.2.4 Other comparison (1 reference)**

26  
27 1. Ahmed ME, Mohammed MS, Mahadi SI. Primary wound closure of diabetic foot  
28 ulcers by debridement and stitching. *Journal of Wound Care*. 2016;25(11):650-4.

#### 29 **1.2.5 Other outcome (7 references)**

30  
31 1. Belkhadir J, el Ghomari H, Klocker N, Mikou A, Nasciri M, Sabri M. Muslims with non-  
32 insulin dependent diabetes fasting during Ramadan: treatment with glibenclamide. *BMJ*.  
33 1993;307(6899):292-5.

34  
35 2. El-Tamalawy MM, Ibrahim OM, Hassan TM, El-Barbari AA. Effect of Combination  
36 Therapy of Ezetimibe and Atorvastatin on Remnant Lipoprotein Versus Double Atorvastatin  
37 Dose in Egyptian Diabetic Patients. *Journal of Clinical Pharmacology*. 2018;58(1):34-41.

38  
39 3. Hassanien M, Elawamy A, Kamel EZ, Khalifa WA, Abolfadl GM, Roushdy ASI, et al.  
40 Perineural Platelet-Rich Plasma for Diabetic Neuropathic Pain, Could It Make a Difference?  
41 *Pain Medicine*. 2020;21(4):757-65.

42  
43 4. Lakhdar N, Denguezli M, Zaouali M, Zbidi A, Tabka Z, Bouassida A. Diet and diet  
44 combined with chronic aerobic exercise decreases body fat mass and alters plasma and  
45 adipose tissue inflammatory markers in obese women. *Inflammation*. 2013;36(6):1239- 47.

46  
47 5. Marais C, Hall DR, van Wyk L, Conradie M. Randomized cross-over trial comparing  
48 the diagnosis of gestational diabetes by oral glucose tolerance test and a designed breakfast  
49 glucose profile. *International Journal of Gynaecology & Obstetrics*. 2018;141(1):85-90.



1  
2  
3 6. Saied GM, Kamel RM, Labib AM, Said MT, Mohamed AZ. The diabetic foot and leg:  
4 combined He-Ne and infrared low-intensity lasers improve skin blood perfusion and prevent  
5 potential complications. A prospective study on 30 Egyptian patients. *Lasers in Medical*  
6 *Science*. 2011;26(5):627-32.

7  
8  
9 7. Tawfik MY. The Impact of Health Education Intervention for Prevention and Early  
10 Detection of Type 2 Diabetes in Women with Gestational Diabetes. *Journal of Community*  
11 *Health*. 2017;42(3):500-10.

## 14 1.2.6

### 15 1.2.7 Other publications (41 references)

16  
17 1. Agbozo F, Abubakari A, Narh C, Jahn A. Are we missing pregnant women with  
18 gestational diabetes? Evidence from a diagnostic accuracy study comparing glycosuria,  
19 glycated haemoglobin, random and fasting glucose to oral glucose tolerance test. *Tropical*  
20 *medicine and international health Conference: 10th european congress on tropical medicine*  
21 *and international health Belgium*. 2017;22(Supplement 1):351- 2.

22  
23 2. Anyanwu AC, Fasanmade OA, Coker HB, Ohwovoriole AE. Vitamin D  
24 supplementation improves glycaemia in Vitamin D deficient nigerians with diabetes mellitus.  
25 *Endocrine reviews Conference: 96th annual meeting and expo of the endocrine society,*  
26 *ENDO 2014 Chicago, IL united states Conference start: 20140621 Conference end:*  
27 *20140624 Conference publication: (varpagings)*. 2014;35(no pagination).

28  
29 3. Aronson R, Cohen O, Conget I, Runzis S, Castaneda J, de Portu S, et al. OpT2mise:  
30 a randomized controlled trial to compare insulin pump therapy with multiple daily injections in  
31 the treatment of type 2 diabetes-research design and methods. *Diabetes Technology &*  
32 *Therapeutics*. 2014;16(7):414-20.

33  
34 4. Azar ST, Echtay A, Wan Bebakar WM, Alaraj S, Berrah A, Omar M, et al. Efficacy and  
35 safety of liraglutide versus sulfonylurea both in combination with metformin during ramadan  
36 in subjects with type 2 diabetes (lira-ramadan): a randomized trial. *Journal of endocrinology,*  
37 *metabolism and diabetes of south africa Conference: 51st congress of the society for*  
38 *endocrinology, metabolism and diabetes of south africa, SEMDSA 2016 South africa.*  
39 *2016;21(1):14.*

40  
41 5. Balde N, Camara A, Sobngwi-Tambekou J, Balti EV, Tchatchoua A, Fezeu L, et al.  
42 Improving access to HbA1c in sub-Saharan Africa (IA3) cohort: cohort profile. *The Pan*  
43 *African Medical Journal*. 2017;27.

44  
45 6. Chi CT. A Multicenter, randomized, double-blind, positive controlled clinical study to  
46 assess the efficacy and safety of Acetyl L-Carnitine in the treatment of diabetic peripheral  
47 neuropathy. *Chictr*. 2008.

- 1  
2  
3 7. Elnashar A, El Maghraby H, Nafee T, Guiziry D, Fournia I. Randomized controlled trial  
4 of the effects of metformin versus combined oral contraceptives in adolescent PCOS women  
5 through a 24 months follow up period. *Human reproduction*. 2015;30:i5.
- 6  
7 8. Evans JL, Bays H, Maki KC, Evans M, Maquet V, Cooper R, et al. Chitin-glucan fiber  
8 effects on oxidized low-density lipoprotein: a randomized controlled trial. *Circulation*.  
9 2012;125(10 SUPPL. 1).
- 10  
11 9. Goedecke JH, Mendham AE, Clamp L, Nono Nankam PA, Fortuin-de Smidt MC, Phiri  
12 L, et al. An Exercise Intervention to Unravel the Mechanisms Underlying Insulin Resistance  
13 in a Cohort of Black South African Women: Protocol for a Randomized Controlled Trial and  
14 Baseline Characteristics of Participants. *JMIR Research Protocols*. 2018;7(4):e75.
- 15  
16 10. Lanasri N, Nibouche NW, Atif L, Makhoul L, Zeraouia F, Hansal F, et al. Comparison  
17 of two therapeutic education methods in diabetic patients: a randomised controlled trial.  
18 *Diabetologia Conference: 54th annual meeting of the european association for the study*  
19 *diabetes, EASD 2018 Germany*. 2018;61(Supplement 1):S433.
- 20  
21 11. Malin SK, Louis-Kullman E, Scelsi AR, Haus JM, Filion J, Godin JP, et al. Whole grain  
22 diet improves glucose tolerance, insulin sensitivity, and beta-cell function in overweight  
23 prediabetic adults. *Diabetes*. 2014;63:A78.
- 24  
25 12. Malin SK, Samat A, Wolski K, Abood B, Pothier C, Bhatt DL, et al. Gastric bypass  
26 surgery enhances ghrelin suppression and improves beta-cell function and central obesity at  
27 24 months in moderately obese adults with type 2 diabetes. *Diabetes*. 2013;62:A729.
- 28  
29 13. Mash B, Levitt N, Steyn K, Zwarenstein M, Rollnick S. Effectiveness of a group  
30 diabetes education programme in underserved communities in South Africa: pragmatic  
31 cluster randomized control trial. *BMC Family Practice*. 2012;13:126.
- 32  
33 14. Mwangi N, Bascaran C, Ng'ang'a M, Ramke J, Kipturgo M, Gichuhi S, et al. Feasibility  
34 of a cluster randomized controlled trial on the effectiveness of peer-led health education  
35 interventions to increase uptake of retinal examination for diabetic retinopathy in Kirinyaga,  
36 Kenya: a pilot trial. *Pilot feasibility stud*. 2020;6:102.
- 37  
38 15. Mwangi N, Bascaran C, Ramke J, Kipturgo M, Kim M, Ng'ang'a M, et al. Peer-support  
39 to increase uptake of screening for diabetic retinopathy: process evaluation of the DURE  
40 cluster randomized trial. *Tropical Medicine & Health*. 2020;48:1.
- 41  
42 16. Mwangi N, Ng'ang'a M, Gakuo E, Gichuhi S, Macleod D, Moorman C, et al.  
43 Effectiveness of peer support to increase uptake of retinal examination for diabetic  
44 retinopathy: study protocol for the DURE pragmatic cluster randomized clinical trial in  
45 Kirinyaga, Kenya. *BMC Public Health*. 2018;18(1):871.
- 46  
47 17. Nassar WF, El-Ansary M, Shehab T, Abdelhameed M, Saad A, Esa W, et al. Effect of  
48 cell-free mesenchymal stem cells microvesicles (MVS) and exosomes therapy on beta-cell  
49 mass in type 1 diabetes mellitus (T1DM). *Diabetes*. 2015;64:A282.
- 50  
51  
52  
53  
54  
55  
56  
57  
58  
59  
60

18. Nct. The Efficacy of Specialist Collaboration and Mobile Screening for Improving the Management of Diabetes. <https://clinicaltrials.gov/show/nct01275040>. 2010.
19. Nct. Trial on an Educative Structured Intervention by Peer Educators to Improve HbA1c of Patients With Type 2 Diabetes in the Sikasso Region in Mali. <https://clinicaltrials.gov/show/nct01153048>. 2010.
20. Nct. Propolis Improves Glycemic Control in Subjects With Type 2 Diabetes and Chronic Periodontitis. <https://clinicaltrials.gov/show/nct02794506>. 2016.
21. Nct. Community- and mHealth-Based Integrated Management of Diabetes in Primary Healthcare in Rwanda. <https://clinicaltrials.gov/show/nct03376607>. 2017.
22. Nct. Nutrition Education Intervention for Adults With Type 2 Diabetes. <https://clinicaltrials.gov/show/nct03334773>. 2017.
23. Nct. Helium-Neon Laser Therapy Versus Infrared Laser Therapy in Treating Patients With Diabetic Foot Ulcer. <https://clinicaltrials.gov/show/nct03338517>. 2017.
24. Nct. Diabetes Self-Management Education (DSME) and Its Effect on Clinical, Psychosocial, and Behavioral Outcomes. <https://clinicaltrials.gov/show/nct03185689>. 2017.
25. Noakes TD. The Women's health initiative randomized controlled dietary modification trial: an inconvenient finding and the diet-heart hypothesis. *South african medical journal*. 2013;103(11):824- 5.
26. Orchard TJ, Sibomana L, Miller R. Evaluation of differing type 1 diabetes treatment regimens in youth in Rwanda. *Pediatric diabetes*. 2014;15:25- 6.
27. Pengpid S, Peltzer K, Skaal L. Efficacy of a church-based lifestyle intervention programme to control high normal blood pressure and/or high normal blood glucose in church members: a randomized controlled trial in Pretoria, South Africa. *BMC Public Health*. 2014;14:568.
28. Rockers PC, Wirtz VJ, Vian T, Onyango MA, Ashigbie PG, Laing R. Study protocol for a cluster-randomised controlled trial of an NCD access to medicines initiative: evaluation of Novartis Access in Kenya. *BMJ Open*. 2016;6(11):e013386.
29. Ross SM. African mango (IGOB131): a proprietary seed extract of *Irvingia gabonensis* is found to be effective in reducing body weight and improving metabolic parameters in overweight humans. *Holistic nursing practice*. 2011;25(4):215- 7.
30. Salman SA, Farghaly TA, Attallah DA, Abdel-Hafeez HA, Shaaban OM. Insulin sensitizing agent (metformin) improves clinical pregnancy rate in clomiphene citrate resistant polycystic ovarian syndrome patients with acanthosis nigricans. *Fertility and sterility*. 2014;102(3 SUPPL. 1):e139.
31. Samir Elbarbary N, Abdel Rahman Ismail E, El-Naggar AR, Hany Hamouda M, El-Hamamsy M. Role of carnosine as an adjuvant therapy for diabetic nephropathy in children and adolescents with type 1 diabetes: relation to oxidative stress, renal functional integrity

1  
2  
3 and glycaemic control. Pediatric diabetes Conference: 43rd annual meeting of the  
4 international society for pediatric and adolescent diabetes , ISPAD 2017 Austria.  
5 2017;18(Supplement 25):115.  
6

7  
8 32. Sherif EM, El Tonbary KY, Abd Aziz MM. Comparative study between the use of  
9 insulin glargine and intermediate acting insulin (NPH) in type 1 diabetic children less than  
10 eight years old. *Pediatric diabetes*. 2014;15:46.  
11

12 33. Sibomana L, Rwabufigiri B, Kaberuka V, Gishoma C, Rubanzana W, Miller RG, et al.  
13 Type 1 diabetes-related quality of life in Rwanda. *Diabetes*. 2015;64:A368.  
14

15 34. Utz B, Assarag B, Essolbi A, Barkat A, El Ansari N, Fakhir B, et al. Improving  
16 detection and initial management of gestational diabetes through the primary level of care in  
17 Morocco: protocol for a cluster randomized controlled trial. *Reproductive Health*.  
18 2017;14(1):75.  
19

20 35. van Olmen J, Ku GM, van Pelt M, Kalobu JC, Hen H, Darras C, et al. The  
21 effectiveness of text messages support for diabetes self-management: protocol of the  
22 TEXT4DSM study in the democratic Republic of Congo, Cambodia and the Philippines. *BMC*  
23 *Public Health*. 2013;13:423.  
24

25 36. Vedanthan R, Kamano JH, Lee H, Andama B, Bloomfield GS, DeLong AK, et al.  
26 Bridging Income Generation with Group Integrated Care for cardiovascular risk reduction:  
27 rationale and design of the BIGPIC study. *American heart journal*. 2017;188:175- 85.  
28

29 37. Veleba J, Janovska P, Kuda O, Horakova O, Malinska H, Kazdova L, et al. Combined  
30 intervention with pioglitazone and N-3 fatty acids in metformin-treated diabetic patients.  
31 *Obesity facts*. 2015;8:213.  
32

33 38. Viviers C, Van Rooijen AJ. Daily physical activity and diet intervention for individuals  
34 with type 2 diabetes mellitus: a randomised controlled trial. *South african journal of clinical*  
35 *nutrition*. 2010;23(3 SUPPL. 2):S35.  
36

37 39. Wargny M, Kleinebreil L, Diop SN, Ndour-Mbaye M, Ba Diop M, Balkau B, et al. SMS-  
38 based intervention in type 2 diabetes: clinical trial in Senegal. *BMJ innovations*. 2018.  
39

40 40. Zeghari L, Aboussaleh Y. Comparison of two approaches of nutritional education in  
41 the management of diabetes. *Annals of nutrition and metabolism Conference: 21st*  
42 *international congress of nutrition, ICN 2017 Argentina*. 2017;71(Supplement 2):903- 4.  
43

44 41. Zennaki A, Niar S, Naceur M, Aichaoui H, Ouzzaa K, Aoui A, et al. Effect of  
45 paramedical treatment codified on balance, quality of life and knowledge of teenagers  
46 suffering from T1DM persisting imbalance. *Pediatric diabetes ( varpagings)*. 2015;16:89.  
47  
48  
49  
50  
51  
52  
53  
54  
55  
56  
57  
58  
59  
60

# BMJ Open

## Randomized controlled trials on prevention, diagnosis, and treatment of diabetes in African countries - a systematic review

|                                 |                                                                                                                                                                                                                                                                                                                                                                                                                                                                                                                                                                                                                                                                                                                                                                                                                                                                      |
|---------------------------------|----------------------------------------------------------------------------------------------------------------------------------------------------------------------------------------------------------------------------------------------------------------------------------------------------------------------------------------------------------------------------------------------------------------------------------------------------------------------------------------------------------------------------------------------------------------------------------------------------------------------------------------------------------------------------------------------------------------------------------------------------------------------------------------------------------------------------------------------------------------------|
| Journal:                        | <i>BMJ Open</i>                                                                                                                                                                                                                                                                                                                                                                                                                                                                                                                                                                                                                                                                                                                                                                                                                                                      |
| Manuscript ID                   | bmjopen-2021-050021.R2                                                                                                                                                                                                                                                                                                                                                                                                                                                                                                                                                                                                                                                                                                                                                                                                                                               |
| Article Type:                   | Original research                                                                                                                                                                                                                                                                                                                                                                                                                                                                                                                                                                                                                                                                                                                                                                                                                                                    |
| Date Submitted by the Author:   | 02-Mar-2022                                                                                                                                                                                                                                                                                                                                                                                                                                                                                                                                                                                                                                                                                                                                                                                                                                                          |
| Complete List of Authors:       | Sandholzer-Yilmaz, Angelika; Martin Luther University of Halle Wittenberg Faculty of Medicine, Institute of General Practice and Family Medicine; University of Göttingen, Department of Haematology and Oncology,<br>Kroeber, Eric; Martin-Luther-Universität Halle-Wittenberg Medizinische Fakultät, Institute of General Practice and Family Medicine<br>Ayele, Wondimu; Addis Ababa University, Department of Preventive Medicine<br>Frese, T; University of Halle-Wittenberg,, Institute of General Practitce & Family Medicine of the Medical Faculty<br>Kantelhardt, Eva; Martin-Luther-University Halle-Wittenber, Institute for Medical Epidemiology, Biostatistics and Informatics<br>Unverzagt, Susanne; Institute of General Practice and Family Medicine, Martin-Luther University Halle-Wittenberg; Department of General Practice, University Leipzig |
| <b>Primary Subject Heading</b>: | Diabetes and endocrinology                                                                                                                                                                                                                                                                                                                                                                                                                                                                                                                                                                                                                                                                                                                                                                                                                                           |
| Secondary Subject Heading:      | Diagnostics, Medical education and training, Medical management, Nutrition and metabolism, Global health                                                                                                                                                                                                                                                                                                                                                                                                                                                                                                                                                                                                                                                                                                                                                             |
| Keywords:                       | Diabetes in pregnancy < DIABETES & ENDOCRINOLOGY, Diabetes & endocrinology < INTERNAL MEDICINE, General diabetes < DIABETES & ENDOCRINOLOGY                                                                                                                                                                                                                                                                                                                                                                                                                                                                                                                                                                                                                                                                                                                          |
|                                 |                                                                                                                                                                                                                                                                                                                                                                                                                                                                                                                                                                                                                                                                                                                                                                                                                                                                      |

SCHOLARONE™  
Manuscripts



I, the Submitting Author has the right to grant and does grant on behalf of all authors of the Work (as defined in the below author licence), an exclusive licence and/or a non-exclusive licence for contributions from authors who are: i) UK Crown employees; ii) where BMJ has agreed a CC-BY licence shall apply, and/or iii) in accordance with the terms applicable for US Federal Government officers or employees acting as part of their official duties; on a worldwide, perpetual, irrevocable, royalty-free basis to BMJ Publishing Group Ltd ("BMJ") its licensees and where the relevant Journal is co-owned by BMJ to the co-owners of the Journal, to publish the Work in this journal and any other BMJ products and to exploit all rights, as set out in our [licence](#).

The Submitting Author accepts and understands that any supply made under these terms is made by BMJ to the Submitting Author unless you are acting as an employee on behalf of your employer or a postgraduate student of an affiliated institution which is paying any applicable article publishing charge ("APC") for Open Access articles. Where the Submitting Author wishes to make the Work available on an Open Access basis (and intends to pay the relevant APC), the terms of reuse of such Open Access shall be governed by a Creative Commons licence – details of these licences and which [Creative Commons](#) licence will apply to this Work are set out in our licence referred to above.

Other than as permitted in any relevant BMJ Author's Self Archiving Policies, I confirm this Work has not been accepted for publication elsewhere, is not being considered for publication elsewhere and does not duplicate material already published. I confirm all authors consent to publication of this Work and authorise the granting of this licence.

1  
2  
3 **Randomized controlled trials on prevention, diagnosis, and treatment of diabetes**  
4 **in African countries - a systematic review**  
5

6 Sandholzer-Yilmaz AS, Kroeber ES, Ayele W, Frese T, Kantelhardt EJ, Unverzagt S  
7  
8  
9

10 Mrs. Angelika Sabine Sandholzer-Yilmaz: Center of Health Sciences, Institute for  
11 Medical Epidemiology, Biostatistics and Informatics, Martin-Luther University Halle-  
12 Wittenberg, Magdeburger Straße 8, 06112 Halle (Saale), Germany.  
13 Email: angelika.sandholzer@med.uni-goettingen.de  
14

15 Dr. Eric Sven Kroeber: Center of Health Sciences, Institute of General Practice and  
16 Family Medicine, Martin-Luther University Halle-Wittenberg, Magdeburger Straße 8,  
17 06112 Halle (Saale), Germany. (Shared first author)  
18 Email: eric.kroeber@posteo.de  
19

20 Dr. Wondimu Ayele: School of Public Health, Addis Ababa University, P.O. Box: 9086,  
21 Addis Ababa, Ethiopia.  
22 Email: wondaay@gmail.com  
23

24 Prof. Dr. Thomas Frese: Center of Health Sciences, Institute of General Practice and  
25 Family Medicine, Martin-Luther University Halle-Wittenberg, Magdeburger Straße 8,  
26 06112 Halle (Saale), Germany.  
27 Email: thomas.frese@uk-halle.de  
28  
29

30 Dr. Eva Johanna Kantelhardt: Center of Health Sciences, Institute for Medical  
31 Epidemiology, Biostatistics and Informatics, Martin-Luther University Halle-Wittenberg,  
32 Magdeburger Straße 8, 06112 Halle (Saale), Germany.  
33 Email: eva.kantelhardt@uk-halle.de  
34

35 Prof. Dr. Susanne Unverzagt: Center of Health Sciences, Institute of General Practice  
36 and Family Medicine, Martin-Luther University Halle-Wittenberg, Magdeburger Straße  
37 8, 06112 Halle (Saale), Germany.  
38 Email: susanne.unverzagt@uk-halle.de  
39  
40

41 Total word count: 5915  
42  
43  
44

45 **Corresponding author:**

46 Mrs. Angelika Sabine Sandholzer-Yilmaz: University Medical Center Göttingen,  
47 Department of Haematology and Oncology, George-August-University Göttingen,  
48 Robert-Koch-Straße 40, 37075 Göttingen, Germany.  
49 Email: angelika.sandholzer@med.uni-goettingen.de  
50  
51  
52  
53  
54  
55  
56  
57  
58  
59  
60

## ABSTRACT

**Objectives** The epidemiological transition from infectious to chronic diseases leads to novel challenges in African health systems. The prevalence of diabetes mellitus (DM) is increasing dramatically. Undiagnosed and undertreated DM leads to numerous complications including end-organ damage and death. Our objectives were to collect the best locally generated evidence on DM interventions, identify knowledge gaps, and determine underexplored research areas.

**Design** A systematic review and meta-analysis of randomized controlled trials.

**Participants and setting** African patients in primary, secondary and tertiary prevention, diagnosis and treatment DM type 1 (DM1), type 2 (DM2) and gestational DM (GDM).

**Outcome** All-cause mortality, glycemic control, complications, quality of life, hospital admission, treatment adherence and costs.

**Data sources** Articles published in MEDLINE Ovid, CENTRAL, CINAHL, African Journals Online and African Index Medicus and the International Clinical Trials Registry Platform in English language without time restrictions. The systematic search was last updated in October 2020.

**Results** Out of 3736 identified publications, we included 60 eligible studies conducted in 15 countries, 75 % were conducted in urban health care settings, including 10,112 participants. We included eight studies on DM1, six on GDM, two on pre-DM, 37 on mainly DM2 including seven on DM related complications. The design of the studied intervention was heterogeneous with a focus on educational strategies. The other studies investigated the efficacy of nutritional strategies including food supplementations, pharmacological strategies and strategies to enhance physical activity. Seven studies included interventions on DM-related complications.

**Conclusions:** Research activities increased in recent years, but available evidence is still not representative for all African countries. There is a big lack of evidence in primary health care and rural settings, implementation research, pharmacological interventions, especially in poorer countries. Nevertheless, the identified studies offer a variety of effective interventions that can inform medical care and future research.

**PROSPERO registration number:** CRD42019122785.

**Keywords:** Diabetes mellitus, Africa, systematic review, randomized-controlled trial



### Strengths and limitations of this systematic review

- This systematic review includes studies at the highest level of evidence to provide an overview of the best available interventions to prevent, diagnose and treat DM in the African context.
- Inclusion criteria are restricted to randomized controlled trials conducted in African countries published in English language with no restrictions on time of publication.
- We performed a systematic search in four international databases and updated the search in October 2020.
- The main aim of our systematic review is to provide an overview of interventions for DM. Meta-analyses are restricted to regularly reported results on HbA1c as strong clinical outcome indicator of an efficient DM management.
- Limited external validity due to the origin from few countries and urban areas, results concentrate on glycaemic control due to short follow-up periods.

## INTRODUCTION

Diabetes mellitus (DM) and other non-communicable diseases (NCDs) are responsible for a double burden in African countries due to the epidemiological transition from communicable to non-communicable diseases and resulting disabilities and deaths (1-3). In Africa, around 19.4 million adults are living with DM. Prevalence rates range from 4.7 % in Sub Saharan Africa (SSA) to 12.2 % in the Middle East and North Africa region (4). Due to the increasing prevalence of risk factors such as obesity and westernized lifestyle, the prevalence of DM is expected to increase by 96 % in SSA until 2045 (4). Currently, about 50 to 60 % of adults living with DM in African countries are undiagnosed (4, 5). Low awareness as well as genetic differences and lifestyle habits result in very heterogeneous prevalence rates of DM between different countries in Africa as well as rural and urban regions (6, 7). Undiagnosed and undertreated DM can result in organ damage, and lead to complications like cardiovascular diseases, peripheral neuropathy, retinopathy and diabetic foot (7, 8). Moreover, these factors attribute to substantial financial costs for households and governments (9). Recently, almost one fifth of COVID-19 deaths in African countries occurred among DM patients (10).

The United Nations 2030 Agenda aims to reduce the burden of premature mortality from NCD including DM through improvement in prevention and treatment (11). Proven and effective actions to prevent or delay the onset of DM base on the empowerment of the population, patients and health care providers (12). Measures on DM include early detection in primary health-care settings, lifestyle modifications including diet, physical activity and, if necessary, medication. Primary prevention programs include lifestyle measures to reduce consumption of sugar-sweetened beverages, mandatory detailed labels on food packaging as well as education and awareness campaigns to increase physical activity are crucial since onset of DM can be detained (13). Moreover, health systems must ensure technical and financial resources as well as training of healthcare staff to recognize the symptoms of DM, to perform and interpret diagnostic tests and provide adequate treatment and care (4). Since DM patients need regular specialist assessment, a functioning referral system is necessary (14). Concerning pharmacotherapy, prioritization of metformin, gliclazide and human insulin is recommended (15). Glucometers, needles and test strips should be provided for people with DM (4).

Only a fraction of patients in African countries have access to the same treatment as recommended in high-income countries (16, 17). At the moment, most guideline recommendations in LMIC are based on studies conducted in high-income Western countries (18). These general management strategies have to be adjusted to local

1  
2  
3 contexts in African countries including environmental, cultural and social aspects like  
4 the relatively young age of patients, co-infections, long distances to health-care  
5 facilities, traditional beliefs, decision making in the families and socioeconomic status.  
6 Furthermore, there is a huge genetic diversity on the African continent (19, 20) .  
7

8  
9 The purpose of this review was to collect the best locally generated evidence,  
10 regarding preventive, diagnostic and therapeutic intervention on DM, as the lack of  
11 evidence is one of the major challenges to prevent and control DM in African countries.  
12  
13 Therefore, we aimed to address existing knowledge gaps and identify unexplored  
14 research areas in the African context. This may support the formulation of local  
15 evidence-based strategies to systematically strengthen clinical and preventive  
16 capacities of healthcare systems in African countries.  
17  
18  
19  
20  
21

## 22 **METHODS**

23 We prospectively registered a protocol of this systematic review in the PROSPERO  
24 International Prospective Register of systematic reviews (CRD42019122785). This  
25 systematic review follows the recommendations of the Preferred Reporting Items for  
26 Systematic reviews and Meta-Analyses (PRISMA) (21) and the methods described in  
27 the Cochrane Handbook for Systematic Reviews of Interventions (22).  
28  
29  
30  
31

### 32 **Inclusion criteria and exclusion criteria**

33  
34 This systematic review includes studies conducted in African countries on the efficacy  
35 of interventions for prevention, diagnosis and treatment of patients with DM including  
36 prediabetes, type 1 (DM1), type 2 (DM2) and gestational DM (GDM). Primary outcome  
37 was defined to be all-cause mortality. Secondary outcomes included glycemic control  
38 (HbA1c, fasting serum or plasma glucose, insulin resistance, oral glucose tolerance  
39 test), quality of life, treatment adherence, hospital admissions, complications of DM and  
40 resulting costs (see Table 1 for detailed inclusion criteria).  
41  
42  
43  
44

45 We included full-text publications on randomized controlled trials (RCTs) (e.g.  
46 individual RCTs, cluster-RCTs and randomized cross-over trials) according to the  
47 Consolidated Standards of Reporting Trials (CONSORT) (23) published in English  
48 language. We excluded international multicenter studies with less than 50 % of sites in  
49 African countries to ensure that the study location was in Africa.  
50  
51  
52

|                                                   |                                                                                                                                                                                                                                                                                                                                                                                        |
|---------------------------------------------------|----------------------------------------------------------------------------------------------------------------------------------------------------------------------------------------------------------------------------------------------------------------------------------------------------------------------------------------------------------------------------------------|
| 53 Design and setting                             | RCTs, mainly conducted in African countries (at least 50 % African countries in international studies)                                                                                                                                                                                                                                                                                 |
| 54<br>55<br>56<br>57<br>58<br>59<br>60 Population | African patients in primary, secondary or tertiary prevention with a clinical diagnosis of <ul style="list-style-type: none"> <li>• Prediabetes</li> <li>• Diabetes mellitus type 1 (DM1, due to autoimmune <math>\beta</math>-cell destruction)</li> <li>• Diabetes mellitus type 2 (DM2, due to a progressive loss of adequate <math>\beta</math>-cell insulin secretion)</li> </ul> |

|                                                                                                                                                                                                                   |                                                                                                                                                                                                                                                                                                                                                                                                  |
|-------------------------------------------------------------------------------------------------------------------------------------------------------------------------------------------------------------------|--------------------------------------------------------------------------------------------------------------------------------------------------------------------------------------------------------------------------------------------------------------------------------------------------------------------------------------------------------------------------------------------------|
|                                                                                                                                                                                                                   | <ul style="list-style-type: none"> <li>Gestational diabetes (diagnosed in the second or third trimester of pregnancy that was not clearly overt diabetes prior to gestation)</li> </ul> <p>As described by the authors</p>                                                                                                                                                                       |
| Interventions                                                                                                                                                                                                     | All interventions to of prevent, diagnose and treat diabetes                                                                                                                                                                                                                                                                                                                                     |
| Comparison                                                                                                                                                                                                        | Placebo or standard care<br>Another intervention or the same intervention with a different dose or timing                                                                                                                                                                                                                                                                                        |
| Outcome                                                                                                                                                                                                           | <p><u>Primary:</u> all-cause mortality</p> <p><u>Secondary:</u></p> <ul style="list-style-type: none"> <li>glucose control (HbA1c, oral glucose tolerance test, insulin resistance, fasting serum or blood glucose)</li> <li>complications</li> <li>quality of life</li> <li>hospital admission</li> <li>treatment adherence</li> </ul> <p><u>Additional:</u> costs<br/>at longest follow-up</p> |
| Publications                                                                                                                                                                                                      | Full-text publications according to CONSORT                                                                                                                                                                                                                                                                                                                                                      |
| <p>CONSORT: Consolidated Standards of Reporting Trials; DM: Diabetes mellitus; DM1: Type 1 diabetes; DM2: Type 2 diabetes; GDM: Gestational diabetes; HbA1c: hemoglobin A1c; RCT: randomized controlled trial</p> |                                                                                                                                                                                                                                                                                                                                                                                                  |

**Table 1:** Inclusion and exclusion criteria

### Systematic search

We performed a systematic search in electronic bibliographic databases (MEDLINE Ovid, CENTRAL, International Clinical Trials Registry Platform of the WHO) as planned in the protocol and added a search in CINAHL and regional electronic databases (African Journals Online and African Index Medicus) (see Online Supplemental File 1 material). All searches were performed without time constrictions. The last search was conducted in October 2020. Search strings were based on Medical Subject Headings (MeSH) and terms on DM, Africa, a list of all 54 African countries and terms related to RCTs. All references retrieved from the literature search were exported into a reference manager software (EndNote) (24). Duplicate references were identified in case of congruence of authors, title, year and journal and thusly deleted. The search strategy is available in the supplementary file.

### Study selection and data extraction.

Two authors independently checked titles and abstracts based on the inclusion criteria (Table 1). The full texts of all potentially eligible papers were assessed for final inclusion. All disagreements were resolved by discussion until consensus was obtained (21). All reported information on the following were extracted and checked by another author:

- publications, registration, and design,
- time and place (country, urban/ rural setting and health care setting)

- study population (inclusion and exclusion criteria, sample size and baseline characteristics on age, gender, type and length of DM, body mass index (BMI) and glycaemic control at baseline)
- intervention and control groups with the number of randomized participants per group and duration of the interventions
- outcomes (classified into primary, secondary, non-specified) and
- results on pre-planned outcomes within the longest follow up period with intervention effects with their 95 % confidence intervals (CI) and level of significance.

The study names were defined by the surname of the first author and the year of the first full-text publication of the results. We compared study and patient characteristics across studies to ensure that each included study represents a unique publication of study data. In cross-over RCTs, only data from the first period were used (25).

### **Quality assessment and risk of bias**

Risk of bias was judged based on seven specific categories (sequence generation, allocation concealment, blinding of participants/personnel, blinding of outcome assessors, incomplete outcome data, selective outcome reporting and other sources of bias) of the Cochrane risk of bias tool as 'low', 'high' or 'unclear' (22). Judgments were done by two of the authors and all discrepancies were resolved by discussion.

Judgments on blinding and incomplete outcome data were based on the primary outcome of included studies. Selective outcome reporting was defined as low when the study protocol with pre-defined primary and secondary outcomes was available and high when any result of pre-planned outcomes was missing. Incomplete outcome data was judged as high when more than 10% of randomized participants dropped out from analyses. Other sources of bias were judged as high risk of bias including missing reporting of sample size calculation, no description of a primary endpoint, and relevant differences of main baseline characteristics between intervention and control groups (22).

### **Data synthesis**

The results of all pre-defined outcomes were described. Effect sizes on HbA1c for the longest follow-up period were visualized in forest plots using RevMan (26). Negative mean differences (MDs) describe lower HbA1c in the intervention compared to the control group. Statistically significant results on HbA1c with MDs over 0.25 % for HbA1c were considered clinically relevant (27). Heterogeneity was interpreted based

1  
2  
3 on the I<sup>2</sup> statistics as not important (I<sup>2</sup> < 30 %), moderate (30-60 %) and substantial  
4 (I<sup>2</sup> > 60 %) (22).  
5

### 6 7 **Protocol registration**

8  
9 We registered a protocol of this systematic review on the PROSPERO website:  
10 <https://www.crd.york.ac.uk/prospero/> under the registration number:  
11 CRD42019122785.  
12  
13

### 14 15 **Patient and Public Involvement**

16 There is no patient involved  
17  
18  
19  
20  
21  
22  
23  
24  
25  
26  
27  
28  
29  
30  
31  
32  
33  
34  
35  
36  
37  
38  
39  
40  
41  
42  
43  
44  
45  
46  
47  
48  
49  
50  
51  
52  
53  
54  
55  
56  
57  
58  
59  
60

## RESULTS

A total of 2865 references were identified from electronic databases and 871 additional trials from the Clinical Trials Registry Platform were checked. We evaluated 185 potentially eligible full-text publications and included 60 eligible studies in 68 publications in this review (Figure 1 and Supplementary file).

**Figure 1:** PRISMA flow chart describing the process of study selection

### Setting

In total 60 studies, which were conducted in 64 study centers of 15 African countries; North Africa (33 studies from four countries), West Africa (10 studies from three countries), East Africa (seven studies from 7 countries), Central Africa (three studies from two countries) and Southern Africa (11 studies only from South Africa) were included. Two studies (Malek 2015 and Chraibi 2017) were conducted in more than one African country and partially conducted in non-African countries. Chraibi (2017) was conducted in Egypt, Morocco, South Arabia and Vietnam. Malek (2015) included four study centers in Algeria, Tunisia, Egypt and South Africa. Those additional study centers are presented in brackets behind the country names in Figure 2. Egypt, South Africa and Nigeria are the three study centers included most often in this review (Figure 2 and supplementary Table 1 available in the supplement).

**Figure 2:** Geographical regions, countries, and type of DM of the included studies

Seventy-five percent of the studies (45/60) were set in urban areas, 5 % (3/60) were in rural areas only. The setting of the remaining 20 % (12/60 studies) was mixed or remained unclear. The majority, 83 % (50/60) of the studies, were conducted in secondary and tertiary health care centers, while 17 % (10/60) took place in primary care settings.

Though the search had no time restrictions, the oldest eligible study (Anderson 2001) was published in 2001. More than 60 % of the studies were published since 2015, and 22 % of them had been published in 2019 or 2020 (see supplementary Table 1 available in the supplement).

### Design

Fifty parallel-group studies randomized individual participants with DM. Six cluster-randomized studies (Fairall 2016, Labhardt 2011, Mash 2014, Steyn 2013, Utz 2018,

1  
2  
3 Webb 2015) randomly assigned health care facilities to intervention and control groups.  
4 In three randomized cross-over studies (Abdulrhman 2013, Krawinkel 2018, van der  
5 Hoogt 2017) each participant received different interventions in a random sequence,  
6 and in one study (Ghoneim 2013) each patient received two different treatment doses  
7 for each eye based on a random allocation of eyes and doses.  
8  
9  
10

### 11 **Interventions for patients with pre-DM**

12  
13 Two studies randomized a total of 112 overweight or obese patients (BMI 25–35 kg/m<sup>2</sup>)  
14 with pre-DM (HbA1c 5.7-7.5 %) and a mean age of 32.9 and 47.5 years (see  
15 supplementary Table 1: Characteristics and results of studies on patients with pre-DM  
16 available in the supplement). These studies stated the efficacy regarding glycemic  
17 control of low and high volume, high-intensity interval training strategies (RezkAllah  
18 2019), and the consumption of bitter melon to improve glucose control (Krawinkel  
19 2018).  
20  
21  
22  
23  
24  
25  
26

### 27 **Interventions for patients with DM1**

28  
29 A total of 8 studies were conducted including 595 patients diagnosed with DM1  
30 (Abdulrhman 2013, Elbarbary 2016, Elbarbary 2018, Elbarbary 2020, Malipa 2013,  
31 Mohamad 2009, Salem 2010, van der Hoogt 2017) (see supplementary Table 2  
32 Characteristics and results of studies on patients with DM1 available in the  
33 supplement). They mainly included children, adolescents, and young adults with a  
34 mean age between 10.4-19.9 years. The mean duration of DM ranged from 3.5 to 8.6  
35 years and the mean baseline HbA1c from 7.21 to 9.52 %. The studies investigated  
36 heterogeneous strategies. Malipa 2013 showed the efficacy of weekly meetings to  
37 improve treatment compliance, reduce impact and worries about DM and improve  
38 general life satisfaction in adolescents. Salem 2010 evaluated the efficacy of two  
39 exercise programs to reduce cardiovascular risk with no relevant effect on glucose  
40 control. Three studies investigated different nutritional strategies and stated the  
41 beneficial effects of honey (Abdulrhman 2013) and camel milk (Mohamad 2009) on  
42 glucose control. Meals with low fat and protein (van der Hoogt 2017) caused less  
43 frequent hypoglycemic events. Elbarbary 2016 showed the efficacy of a low-glucose  
44 suspension algorithm during Ramadan to reduce the number of hypo- and  
45 hyperglycemic excursions. Two studies on food supplementation stated improved  
46 glycemic control with carnosine (Elbarbary 2018), but no benefit from a vitamin B  
47 complex (Elbarbary 2020).  
48  
49  
50  
51  
52  
53  
54  
55  
56  
57  
58  
59  
60



## Interventions for patients with DM2

A total of 44 studies were conducted including 8881 patients suffering from DM2 or different diabetic illnesses (see supplementary Table 3: Characteristics and results of studies on patients with DM2 available in the supplement). Most studies included patients with a mean age between 50 and 60 years, only four studies included younger patients (Adjei 2015, El Gayar 2019, Matter 2020, Maharaj 2016). Most studies included more females than males. These studies presented a wide variety of patients in different stages of DM2 and general conditions. They ranged from newly diagnosed DM (El Gayar 2019, Labhardt 2011, Mostafa 2019, Owolabi 2019, Somanah 2012), non-insulin dependency or oral insulin therapy (Adibe 2013, Ali 2019, Fayehun 2018, Maharaj 2016, Malek 2015, Ragheb 2020) to durations of over 10 years with severe DM related complications (Abaza 2017, Nteleki 2015, Tsobigny-Tsague 2018, El-Shakawy 2016, Ghoneim 2013, Saeed 2013, Yakoot 2019). Thus, mean baseline HbA1c ranged from 6.75% to 11.1%. Most studies included high proportions of overweight and obese participants with mean BMIs ranging from 22.4 to 40.8 kg/m<sup>2</sup>.

## Educational strategies

A total of 19 studies with 6942 patients and follow-up periods between 2-14 months investigated the impact of educational strategies on diabetes treatment. These included providing information about lifestyle modification measures, dietary recommendations, drug-based therapy, DM-related complications, and self-management. Training sessions were provided based on group-based educational sessions or individual treatment plans by nursing staff or pharmacists and complemented by lectures, discussion services, brochures, newsletters, computer programs, electronic communication devices and tele-monitoring systems. Three of these studies were led by nurses (Adibe 2013, Hailu 2018, Labhardt 2011) and two cluster-randomized studies trained nurses to expand their role in the treatment of patients with NCDs (Fairall 2016) or aimed to improve guideline implementation in the treatment of patients with DM (Steyn 2013).

Three studies (Abaza 2017, Adjei 2015, Labhardt 2011) reported results on treatment adherence. All strategies lead to improved adherence, measured by improved perception of patients to treatment recommendations (Abaza 2017) or higher regularity of appointment schedules (Adjei 2015, Labhardt 2011). Two studies (Adibe 2013, Mash 2014) reported results on costs with lower costs for patients receiving educational strategies. Two studies reported fewer admissions to different health-care facilities (hospital or emergency room and clinic visits) (Abaza 2017, Chraibi 2017).

1  
2  
3 Results on quality of life were reported in two studies with follow-up periods over 12  
4 months and conflicting results. A structured self-care education program by  
5 pharmacists and nurses (Adibe 2013) improved quality of life, but no benefit was  
6 shown after group education by trained professionals (Mash 2014).  
7  
8

9 The majority of the educational strategies resulted in lower mean HbA1c levels in the  
10 intervention groups with a clinically relevant mean decrease of -0.66 % (95 %-CI -0.94  
11 to -0.39) and substantial heterogeneity between results of different studies ( $I^2=64\%$ )  
12 (Figure 3).  
13  
14  
15  
16  
17  
18

19 **Figure 3:** Results of educational strategies on HbA1c levels or changes of HbA1c  
20 levels of patients with DM2  
21  
22  
23

### 24 **Strategies to enhance physical activity**

25  
26 Five studies with 359 participants evaluated the efficacy of different strategies to  
27 enhance physical activity on glucose control. Strategies included counselling, setting  
28 goals and training sessions with different intensities or both over periods between 8-12  
29 weeks.  
30  
31

32 Two studies were successful in lowering HbA1c where patients were given goals to  
33 accumulate 10,000 steps per day (Fayehun 2018) or patients were allocated to  
34 rebound exercise (Maharaj 2016). A third study investigated the effects of aerobic  
35 exercise training and was able to decrease fasting plasma glucose (28).  
36  
37

38 Two other exercise interventions failed to reduce HbA1c by incremental exercises  
39 compared to relaxation (Van Rooijen 2004) or higher intensity of exercises (Yan 2014)  
40 (Figure 4). Results were not pooled due to considerable heterogeneity with different  
41 directions of treatment effects.  
42  
43  
44  
45  
46  
47

48 **Figure 4:** Results of strategies to enhance physical activity on HbA1c levels of patients  
49 with DM2  
50  
51  
52

### 53 **Pharmacological strategies**

54  
55 Three studies with 479 participants tested the efficacy of pharmacological treatment  
56 strategies on glucose control of patients with DM2. El-Haggar 2015 found ketotifen and  
57 glimepiride an effective dual therapy. Malek 2015 described the non-inferiority of once-  
58  
59  
60

1  
2  
3 daily basal-bolus insulin analogues and thrice daily insulin therapy. Distiller 2014 did  
4 not find an additional improvement with exenatide in addition to insulin and metformin  
5 therapy on glycemic control.  
6  
7

### 8 **Strategies on food supplementations**

9  
10 Several different food supplementations were tested in 10 studies including 762  
11 participants. Vitamin D3 supplementation had a positive effect on glycemic control in  
12 two studies (Ali 2019, Anyanwu 2016). Four studies tested the effect of plant-based  
13 substances. Ginger powder and balantines aegyptiaca (desert date) extract regimes  
14 supported glucose control (El Gayar 2019, Rashad 2017). Nigella sativa (black cumin)  
15 oil capsules slightly improved glucose control but were inferior to metformin (Moustafa  
16 2019). A regime based on fermented papaya did show beneficial results (Somanah  
17 2012). Anderson 2001 and Matter 2020 showed positive effects of zinc/ chromium in  
18 chronic DM and zinc supplementation in diabetic beta-thalassemia major patients. The  
19 addition of rutin and vitamin C did not improve the results of oral antidiabetics (Ragheb  
20 2020). The addition of l-carnitine improved diabetic control achieved by glimepiride  
21 treatment (El-Sheikh 2019).  
22  
23  
24  
25  
26  
27  
28  
29

### 30 **Strategies on the treatment of DM related complications**

31  
32 Seven studies with 351 participants and follow-up periods between 3-12 months  
33 evaluated different strategies to treat possibly DM-related complications including  
34 periodontitis (3 studies), foot ulcerations (2 studies) and macular edema (2 studies).  
35 El-Makaky 2020 and Tsobgny-Tsague 2018 described the benefit of immediate vs.  
36 delayed non-surgical periodontal interventions on glucose control and El-Sharkawy  
37 2016 stated the effectiveness of propolis as an additive in periodontitis treatment. Two  
38 studies stated a benefit of combined phototherapy and podiatric management (Nteleki  
39 2015) and an additional local ointment application of royal jelly and panthenol (Yakoot  
40 2019) on the healing of lower extremity ulcers. Ghoneim 2013 and Saeed 2013 tested  
41 different diabetic macular edema treatment strategies. Both studies described generally  
42 positive treatment effects but also considerable adverse events including rise of intra  
43 ocular pressure and glaucoma.  
44  
45  
46  
47  
48  
49  
50  
51  
52

### 53 **Interventions for patients with DM in a pregnant woman**

54  
55 Six studies included a total of 574 pregnant women at increased risk for gestational DM  
56 (GDM) (Embaby 2016), with newly diagnosed GDM (Utz 2018, El-Shamy 2018,  
57 Ashoush 2016) or with newly diagnosed GDM or pre-existing DM (Beyuo 2015, Ibrahim  
58 2014) between the 20<sup>th</sup> and 34<sup>th</sup> week of pregnancy. The mean age ranged from 24.2-  
59  
60

1  
2  
3 33.3 years (see supplementary Table 4: Characteristics and results of studies on  
4 pregnant women with DM available in the supplements).

5  
6 Three studies (Ashoush 2016, Beyuo 2015, Ibrahim 2014) with 289 participants  
7 examined metformin as an additional medication to insulin in comparison to insulin  
8 therapy only. Effects on glycemic control of metformin supported therapy ranged from a  
9 relevant decrease (Ashoush 2016) to no effect on fasting plasma glucose, but  
10 beneficial effect on two hour plasma glucose in a 75 g OGTT (Beyuo 2015) in women  
11 without insulin resistance. Adding metformin to insulin therapy of pregnant women with  
12 insulin resistant diabetes was associated with several benefits concerning the time of  
13 hospital stay, reduced occurrence of maternal or neonatal hyperglycemia, less  
14 neonatal intensive care unit (NICU) admissions and reduced cases of respiratory  
15 distress syndrome (Ibrahim 2014).

16  
17 The other studies (285 participants) investigated non-pharmacological interventions.  
18 The tested interventions were aerobic exercise program (treadmill walking) (Embaby  
19 2016), acupressure (El-Shamy 2018) and screening for GDM, followed by nutritional  
20 and exercise counseling for positive tested women (Utz 2018). The aerobic exercise  
21 program resulted in a relevant reduction of fasting plasma glucose until delivery  
22 (Embaby 2016). The acupressure intervention did not manage to show a benefit  
23 regarding glycemic control (El-Shamy 2018). Screening, counselling and intensive  
24 follow-up were able to improve glycemic control and reduce the number of newborns  
25 with macrosomia (Utz 2018).

### 36 37 38 **Potential biases**

39  
40 None of the included studies was categorized as low risk of bias in all seven domains  
41 only (see supplementary Table 5: Judgement on risk of bias available in the  
42 supplements).

43  
44 The most common restriction on study quality was found in the domain performance  
45 bias due to a lack of blinding of participants and personnel in 48 studies. Detection bias  
46 due to blinding of the outcome assessors was judged as high or unclear in 38 studies.  
47 14 studies with high risk of bias due to no blinding of participants and personnel,  
48 reported adequate methods to ensure blinding of the outcome assessors.

49  
50 Another frequent problem was an incomplete analyses of outcome data in 26 studies  
51 defined as a loss to follow-up over 10 % of randomized participants or per-protocol  
52 analyses.

53  
54 In 23 studies a protocol was available. Risk of bias due to selective outcome reporting  
55 was judged as low in 15 studies. High risk of bias, meaning lack of reporting of results  
56  
57  
58  
59  
60

1  
2  
3 of some pre-planned outcomes was judged in eight studies (Abdulrhman 2013, Beyuo  
4 2015, Elbarbary 2020, Matter 2020, Owolabi 2019, Somanah 2012, Utz 2018 Yakoot  
5 2019).  
6  
7

8 In the domain sequence generation, two studies were assessed as high risk. El- Nteleki  
9 2015 randomized only seven patients into three different treatment groups. Shamy  
10 2018 used a non-probability sampling method on the basis of the hospital admission  
11 code and was subsequently judged as high risk in domains sequence generation and  
12 allocation concealment.  
13  
14

15 In 31 studies, we identified further methodological limitations including missing  
16 reporting of information on sample-size calculation, definition of primary and secondary  
17 target criteria, relevant differences regarding baseline characteristics or reporting of  
18 intermediate results only.  
19  
20  
21  
22  
23  
24  
25  
26  
27  
28  
29  
30  
31  
32  
33  
34  
35  
36  
37  
38  
39  
40  
41  
42  
43  
44  
45  
46  
47  
48  
49  
50  
51  
52  
53  
54  
55  
56  
57  
58  
59  
60

## DISCUSSION

This systematic review describes interventions from 60 studies to summarize the available randomized trials on to prevention, diagnosis and treatment of DM with a total of 12,113 participants from 15 African countries. Several promising interventions were identified that can be used in settings with limited resources or involved locally available materials. Despite a trend of increasing research activity in recent years, many areas of diabetes research in African countries are still underexplored leaving knowledge gaps that should be tackled in the future.

### Scarcity of randomized DM trials in African countries

While 60 included randomized trials are not nothing it also means an average only slightly higher than one randomized DM study per country for all types of diabetes that has ever been conducted and published. Only two studies on pre-diabetic interventions have been conducted, despite a clear need and aim to tackle early to avoid the future DM burden that is expected to arise (17). Implementation research, considered important in addressing know-do gaps in real-world settings, especially in primary care settings are still very rare (29). Implementing evidence-based care while observing, evaluating and publishing it's result deems crucial in the massive challenge of creating diabetes care infrastructure for millions of diabetes patients. Nevertheless, forty-three of the 60 studies have been conducted since 2015 demonstrating a positive trend of research activity.

### Rural vs. urban, primary vs. secondary care and geographic disparities

Three out of four studies were set in urban areas and only 5 % (3/60) were set in rural areas only. Despite decreasing population shares over the last decades, still almost 60 % of people in Sub-Saharan Africa are living in rural areas with rising absolute numbers (currently about 667 million) (30). Despite diabetes being considered to be associated with westernized lifestyle more prevalent in urban areas, prevalence rates in rural areas are still high, in some parts even higher (31, 32).

Moreover, the majority (83 %) of the studies were conducted in secondary and tertiary health care centers, leaving less than one fifth in primary care settings where most routine and day-to-day diabetes care should be carried out to support people in their everyday life with this chronic long-term illness to prevent long-term consequences.

Another considerable aspect is the geographical distribution of the conducted studies. Almost half (46%) of the included trial were conducted in Egypt, the country ranking 2<sup>nd</sup> on the African Infrastructure Development Index 2018 with the highest prevalence in

1  
2  
3 Northern Africa (33). South Africa, ranking fourth on the index, contributed another  
4 share of 18% (11 studies) (7). Almost three quarters of the studies were set in the top  
5 ten ranking countries on that list, all Northern and Southern Africa leaving huge blank  
6 spaces in Central, Western and Eastern Africa including countries with high  
7 prevalences including Kenya and Zimbabwe and pointing to both the infrastructural  
8 necessities of research as well as the structural development that is still ahead before  
9 to increase research activity (34). The broad majority of included studies was  
10 conducted in urban settings, this is likely due to the better health care infrastructure  
11 and thusly the increased practicability of research. Health care workers, including  
12 doctors and nurses, seem to prefer providing services in urban areas leading to an  
13 even higher deficit of health care access in rural areas. The consequence is limited  
14 generalizability of the results on the needs of the rural population.  
15  
16  
17  
18  
19  
20  
21  
22  
23

### 24 **Screening strategies to diagnose DM and its complications**

25  
26 The rate of undiagnosed patients with DM is estimated to be between 3.9 % in SSA  
27 (35) and 12 % in North Africa (36). This might be related to genetic disparities in the  
28 development level of the health care system and awareness in the general population  
29 (19). The high rates of undiagnosed DM highlight a high need for research on and  
30 implementation of DM screening strategies in the African context. We identified two  
31 studies (37-39) investigating primary care strategies to detect and manage women with  
32 GDM (37) and screen diabetic patients for complications (40). The observed GDM  
33 prevalence of 23.7% among pregnant Moroccan women underlines the importance of  
34 regular screening and management to enable early interventions at a primary care  
35 level (37). A diabetic population receiving primary care found a high rate of  
36 complications including retinopathy, maculopathy, neuropathy, nephropathy, possible  
37 infarction and severe erectile dysfunction (38-40).  
38  
39  
40  
41  
42  
43  
44  
45

### 46 **Intervention for patients with pre-DM for primary prevention of DM**

47  
48 We identified two studies patients (41, 42) with elevated blood glucose levels below  
49 diagnosis criteria of DM improving glucose levels via interval training bitter gourd, a  
50 plant with antidiabetic properties that is consumed in many Asian as well as some  
51 African countries. Both studies offer effective strategies, but further research is  
52 necessary, exemplarily on early educational strategies, as a measure of patient  
53 empowerment and early tackling of DM (43).  
54  
55  
56  
57  
58  
59  
60

## **Educational strategies for patients and health-care providers**

Education is essential for effective diabetes control. It must be accomplished at, personal (patient empowerment), community (raise the awareness of the disease and its risk factors) and health care provider level (training of medical staff to diagnose, monitor and treat it correctly) to manage the rising burden of diabetes (44).

Due to complex challenges for DM patients and health care providers, educational campaigns are necessary to support health care providers and empower patients to manage their disease-associated decisions, lifestyle habits and medication use. Best benefits are proposed to be achieved by continuous individualized education, guided by patients' concerns, preferences and needs (12, 45).

Several studies on DM2 (46-58), DM1 (59) and GDM (37) investigated long-term interventions to support patient empowerment based on improved knowledge, motivation, and capacity to take control of their disease (12). Three studies trialed nurse-led (47, 53, 54, 60) and 2 studies investigated strategies to train healthcare providers in the management of patients with DM (61, 62). Improvement of patient empowerment improved adherence and glucose control, fewer admissions to healthcare facilities and lower costs. Only two studies reported on the quality of life with heterogeneous results (47, 60, 63).

Currently, the COVID-19 pandemic has forced all nations to implement alternative, oftentimes digital strategies including tele-monitoring and teleconsultation to continue care of NCDs (64). The application of telemedicine in DM management showed beneficial results (56, 65). Lifestyle focused messages might be an effective low-cost option to keep patients motivated to adhere to healthy lifestyles and further research seems advisable (66).

All included studies were adapted to local contexts and the trialed strategies hold the promise of adaptability to health care systems in other African and LMIC. Moreover, the tasks of nurses in NCD care could be reshaped and expanded in countries with comparably few physicians in order to improve DM diagnostics, treatment and education.

### **Strategies to increase physical activity**

As in the literature (GDM (67), DM1 (68, 69) and DM2 (70, 71)), exercise therapy generally showed positive effects (DM2 (28, 72-75), DM1 (76), GDM (77)) on glycemic control. Exemplarily, four weeks by setting the goal to accumulate 10,000 steps per day significantly reduced HbA1C levels (72). Due to limited follow up periods, it is advisable to target long-term adherence to these strategies in future research.



### **Pharmacological strategies**

Currently, the available research on pharmacological interventions for DM is sparse in Africa. We identified only six studies (3 on DM2 (78-80), 3 on GDM (81-83)) testing pharmacological interventions as a central part of DM care (84) despite known differences between African and European Americans (19). This might be attributable to our criteria excluding international studies with less than 50% of the sites in African countries (e.g. (85-90)). Many major multi centric pharmacological studies only have few study centers in Africa. Nevertheless, in-depth research into differing effectiveness of diabetic medications is still lacking.

reported the usability and safety of a basal-bolus insulin regime with stepwise intensification in an African setting The efficacy of basal-bolus insulin regimes, as an easy to handle, practical DM treatment option was successfully tested by Malek 2015 (80) and has been previously described in other settings (91, 92). Further research should consider regional contexts like availability of medication, practicability of the medication (e.g. insulin needs proper storage (93, 94)) lifestyle habits and genetic aspects (95, 96). Consideration of findings on African American cohorts seems advisable (97, 98).

### **Strategies on nutrition and food supplementations**

Nutritional and food supplementation interventions can successfully be used supporting pharmacological care or in early and pre-DM stages improving glycemic control, lipid profiles and management of DM-related complications (99-111). In this review, nutritional interventions (41, 112-114), including long-term consumption of honey (112), camel milk (113) and a low fat and protein content of meals (114) with positive effects on metabolic control. Camel milk, traditionally used for treatment of DM in arid areas of Africa and Asia, improves glycemic control, reduces insulin requirement and limits diabetic complications (115). Rashad 2017 (116) stated the beneficial effects of *balanites aegyptiaca* (desert date) extract on glycemic control. This evergreen tree is common in arid regions in Africa and was traditionally used in Egyptian traditional medicine (117).

Several food supplementations (zinc-gluconate (118) and zinc-chromium (119) supplementations, ginger powder (120), *Nigella sativa* oil capsules (121), L-carnitine (122), L-carnosine (123) as well as vitamin B, C or D supplementation (63, 124-126)) had positive effects on glycemic control.

### **Strategies on the treatment of DM related complications**

1  
2  
3 Three studies tested the role of periodontitis treatment in diabetic patients (127-129).  
4 Tsobgny-Tsague et al. (129) and El-Makaky et al. (127) described the importance of  
5 early treatment start, resulting in favorable patient outcomes in periodontal health and  
6 glucose control. El-Sharkawy et al. (128) found propolis to be a favorable addition to  
7 planing and scaling. In an Ethiopian cohort, only 21% of DM patients received oral  
8 health screening (130). The WHO regards oral health as a crucial component of health  
9 care with 12-14 % of 35 to 44-year-old Africans suffering from periodontitis (131).  
10  
11 Treatment options for diabetic wounds were tested in two studies (132, 133).  
12 Phototherapy in addition to usual care was first trialed in an African cohort of patients  
13 suffering from diabetic foot ulcers, showing beneficial wound healing outcomes. Similar  
14 results were described in other settings (134). The addition of propolis to usual care  
15 regimes showed improved wound healing. These findings are supported by studies  
16 from other settings (135, 136).  
17  
18  
19  
20  
21  
22  
23  
24  
25

### 26 **Strength and limitations**

27  
28 The external validity of this systematic review is limited by the focus on a limited  
29 number of countries and urban health care setting. The included studies were set in 15  
30 of the 54 African countries with a focus on the North African region, especially Egypt.  
31 Egypt is the country with the highest known prevalence of DM in the African continent  
32 (4, 7). This might be related to economic expansion and urbanization, but also due to  
33 specific dietary issues (e.g. white bread, polished rice, trans fats), reduced physical  
34 activity due to prohibition of exercise in public places, shortage of exercise facilities,  
35 poor physical education in schools. Poor diet and physical inactivity are causing a high  
36 rate of overweight and obesity among the Egyptian population (137).  
37  
38

39 Our pre-planned primary outcome was mortality which was not reported in any of the  
40 included studies. Since DM is a chronic disease with a slow progression and long-term  
41 development of organ damage, the survival time is higher than the follow-up time of  
42 most of the studies. The included studies looked at long-term treatment strategies  
43 rather than treatment for acute hypo- or hyperglycemic events that can lead to acutely  
44 fatal events. Nevertheless, long-term glucose control, being represented by the HbA1c  
45 value is one of the strongest clinical-outcome indicators of efficient DM management  
46 and health outcomes (138). It is easy to measure and serves as a representation of the  
47 individual's average blood glucose levels in the previous 3 months (138). Furthermore,  
48 it is up to discussion if improvement of glycemic control based on blood glucose  
49 measures like HbA1C are necessary the best strategic in LMIC or if diabetes  
50  
51  
52  
53  
54  
55  
56  
57  
58  
59  
60

1  
2  
3 complications are more effectively prevented by targeting blood pressure or blood lipids  
4 (139).

5  
6 Next, this review does not include non-randomized study types including prospective  
7 cohort trials or qualitative research, probable not taking into account the evidence that  
8 has been accumulated. Nevertheless, our aim was to search for randomized trials,  
9 since these study types, if conducted well, have a high evidence quality, allowing to  
10 minimize biases. Moreover, many of the studies included had a high risk of bias.

11  
12 This systematic review includes studies as the highest level of evidence to investigate  
13 the benefits and harms of interventions (140). We included studies published in the  
14 English language without time restrictions. Language bias was shown to be unlikely.  
15 Despite the high linguistic diversity on the African continent, the languages mostly  
16 spoken are English, Arabic, and French (141). Eventually, we did not exclude any  
17 study due to the publication language, but we might have missed studies from journals  
18 that are not listened in searched databases.

## 25 26 27 **CONCLUSION**

28 This systematic review shows an increasing number of studies due to the rising  
29 prevalence and awareness of DM in African countries. However, the number of high-  
30 quality studies is still low and emphasizes knowledge gaps and underexplored  
31 research areas. Available studies are not representative of all African regions and were  
32 mainly conducted in urban areas of higher developed countries. Especially primary  
33 care settings and implementation research are underrepresented.

34  
35 An improvement of the prognosis of DM patients in Africa requires adequate technical  
36 and financial resources, training of healthcare staff and the implementation of  
37 comprehensive strategies to improve early diagnostics, adherence to medical  
38 treatment and subsequent regular checks. The identified studies offer a variety of  
39 effective approaches as a basis for local guidelines in the different fields of action in  
40 DM care adjusted to regional circumstances.

## 47 48 49 **Ethics approval**

50  
51 No ethical approval is necessary

## 52 53 54 **Authors contribution**

55 Sandholzer-Yilmaz AS developed the concept of the review, performed the initial  
56 systematic search in the International Trials Registry, screened the references,  
57 extracted study data in 2019, wrote a draft of the manuscript and worked in the  
58  
59  
60

1  
2  
3 coauthors comments on the final version of the manuscript and finally submitted the  
4 manuscript.  
5

6 Kroeber ES updated the systematic search, added a search in 2 regional databases,  
7  
8 screened the updated search results and extracted the updated data and wrote the  
9 final version of the manuscript.  
10

11 Unverzagt S has expertise in systematic reviews and is the guarantor of the  
12 methodological quality of the systematic review, developed the review concept has  
13 registered the protocol, performed the systematic search in 2 databases, screened all  
14 references, checked the initial as well as the updated data extraction and wrote the  
15 final version of this manuscript.  
16  
17

18 Ayele W provided expertise on the needs of evidence in the African context, developed  
19 the review concept, discussed the protocol and critically read and commented on the  
20 manuscript.  
21  
22

23 Frese T and provided expertise on primary care, developed the review concept,  
24 critically read and commented on the manuscript.  
25

26 Kantelhardt EJ provided expertise on the needs of evidence in the African context,  
27 developed the review concept, critically read and commented on the manuscript.  
28  
29

30  
31 Sandholzer-Yilmaz AS and Kroeber ES are joint first authors of this manuscript.  
32  
33

### 34 **Acknowledgements:**

35 Dawn Bielawski did the proofreading.  
36  
37  
38  
39

### 40 **Funding statement**

41 This research received no specific grant from any funding agency in the public,  
42 commercial or not-for-profit sectors.  
43  
44  
45

### 46 **Competing interests statement**

47 The authors declare no competing interests.  
48  
49  
50

### 51 **Data sharing statement**

52 No additional data available  
53  
54  
55  
56  
57  
58  
59  
60

## References

1. Kushitor MK, Boatemaa S. The double burden of disease and the challenge of health access: Evidence from Access, Bottlenecks, Cost and Equity facility survey in Ghana. *PLoS One*. 2018;13(3):e0194677.
2. Misganaw A, Mariam DH, Araya T. The double mortality burden among adults in Addis Ababa, Ethiopia, 2006-2009. *Preventing chronic disease*. 2012;9.
3. Roth GA, Abate D, Abate KH, Abay SM, Abbafati C, Abbasi N, et al. Global, regional, and national age-sex-specific mortality for 282 causes of death in 195 countries and territories, 1980–2017: a systematic analysis for the Global Burden of Disease Study 2017. *The Lancet*. 2018;392(10159):1736-88.
4. Federation ID. IDF Diabetes Atlas 9th edition <https://www.diabetesatlas.org/en/>: International Diabetes Federation; 2019 [
5. Beagley J, Guariguata L, Weil C, Motala AA. Global estimates of undiagnosed diabetes in adults. *Diabetes research and clinical practice*. 2014;103(2):150-60.
6. Asmelash D, Asmelash Y. The Burden of Undiagnosed Diabetes Mellitus in Adult African Population: A Systematic Review and Meta-Analysis. *Journal of Diabetes Research*. 2019;2019:4134937.
7. Bos M, Agyemang C. Prevalence and complications of diabetes mellitus in Northern Africa, a systematic review. *BMC public health*. 2013;13(1):387.
8. Awadalla H, Noor SK, Elmadhoun WM, Almobarak AO, Elmak NE, Abdelaziz SI, et al. Diabetes complications in Sudanese individuals with type 2 diabetes: overlooked problems in sub-Saharan Africa? *Diabetes & Metabolic Syndrome: Clinical Research & Reviews*. 2017;11:S1047-S51.
9. Mutyambizi C, Pavlova M, Chola L, Hongoro C, Groot W. Cost of diabetes mellitus in Africa: a systematic review of existing literature. *Globalization and health*. 2018;14(1):3.
10. Clark A, Jit M, Warren-Gash C, Guthrie B, Wang HH, Mercer SW, et al. Global, regional, and national estimates of the population at increased risk of severe COVID-19 due to underlying health conditions in 2020: a modelling study. *Lancet Glob Health*. 2020;8(8):e1003-e17.
11. Nations U. Sustainable development goals. Goal 3: Ensure healthy living and promote well-being for all at all ages 2019 [Assessed 29/09/2020]. Available from: <https://www.un.org/sustainabledevelopment/health/>.
12. Gómez-Velasco DV, Almeda-Valdes P, Martagón AJ, Galán-Ramírez GA, Aguilar-Salinas CA. Empowerment of patients with type 2 diabetes: current perspectives. *Diabetes, metabolic syndrome and obesity: targets and therapy*. 2019;12:1311.
13. Audain KA, Levy L, Ellahi B. Sugar sweetened beverage consumption in the early years and implications for type 2 diabetes: A sub-Saharan Africa context. *Proceedings of the Nutrition Society* 2019;78(4):547-53.
14. Cosentino F, Grant PJ, Aboyans V, Bailey CJ, Ceriello A, Delgado V, et al. 2019 ESC Guidelines on diabetes, pre-diabetes, and cardiovascular diseases developed in collaboration with the EASD: The Task Force for diabetes, pre-diabetes, and cardiovascular diseases of the European Society of Cardiology (ESC) and the European Association for the Study of Diabetes (EASD). *European heart journal*. 2020;41(2):255-323.
15. Organization WH. World Health Organization model list of essential medicines: 21st list 2019. World Health Organization; 2019.
16. Association AD. 2. Classification and Diagnosis of Diabetes: Standards of Medical Care in Diabetes-2020. *Diabetes Care*. 2020;43(Suppl 1):S14.
17. Roglic G. WHO Global report on diabetes: A summary. *International Journal of Noncommunicable Diseases*. 2016;1(1):3.

18. Checkley W, Ghannem H, Irazola V, Kimaiyo S, Levitt NS, Miranda JJ, et al. Management of NCD in low-and middle-income countries. *Global heart*. 2014;9(4):431-43.
19. Gomez F, Hirbo J, Tishkoff SA. Genetic variation and adaptation in Africa: implications for human evolution and disease. *Cold Spring Harbor perspectives in biology*. 2014;6(7):a008524.
20. Owolabi MO, Yaria JO, Daivadanam M, Makanjuola AI, Parker G, Oldenburg B, et al. Gaps in guidelines for the management of diabetes in low-and middle-income versus high-income countries—a systematic review. *Diabetes Care*. 2018;41(5):1097-105.
21. Moher D, Liberati A, Tetzlaff J, Altman DG, Group P. Preferred reporting items for systematic reviews and meta-analyses: the PRISMA statement. *PLoS med*. 2009;6(7):e1000097.
22. Higgins JPT, Green S. *Cochrane handbook for systematic reviews of interventions* version 5.1.0 [updated March 2011]. Collaboration TC, editor. Available from [www.handbook.cochrane.org](http://www.handbook.cochrane.org). 8.3.2020. 2011.
23. Moher D, Hopewell S, Schulz KF, Montori V, Gøtzsche PC, Devereaux P, et al. CONSORT 2010 explanation and elaboration: updated guidelines for reporting parallel group randomised trials. *International journal of surgery*. 2012;10(1):28-55.
24. Team TE. *EndNote*. EndNote X9 ed. Philadelphia, PA: Clarivate; 2013.
25. Higgins JPT, Eldridge S, Li Te. Chapter 23: Including variants on randomized trials. In: Higgins JPT, Thomas J, Chandler J, Cumpston M, Li T, Page MJ, et al., editors. *Cochrane Handbook for Systematic Reviews of Interventions* version 61 (updated September 2020). [www.training.cochrane.org/handbook](http://www.training.cochrane.org/handbook); Cochrane; 2020.
26. (RevMan) RM. Version 5.3. Copenhagen: The Nordic Cochrane Centre, The Cochrane Collaboration 2014.
27. Fortwaengler K, Parkin CG, Neeser K, Neumann M, Mast O. Description of a new predictive modeling approach that correlates the risk and associated cost of well-defined diabetes-related complications with changes in glycated hemoglobin (HbA1c). *Journal of diabetes science and technology*. 2017;11(2):315-23.
28. Asuako B, Moses MO, Eghan BA, Sarpong PA. Fasting plasma glucose and lipid profiles of diabetic patients improve with aerobic exercise training. *Ghana Medical Journal*. 2017;51(3):120-7.
29. Theobald S, Brandes N, Gyapong M, El-Saharty S, Proctor E, Diaz T, et al. Implementation research: new imperatives and opportunities in global health. *The Lancet*. 2018;392(10160):2214-28.
30. LLC M. Sub-Saharan Africa Rural Population 1960-2022 2022 [Available from: <https://www.macrotrends.net/countries/SSF/sub-saharan-africa/rural-population>].
31. Chiwanga FS, Njelekela MA, Diamond MB, Bajunirwe F, Guwatudde D, Nankya-Mutyoba J, et al. Urban and rural prevalence of diabetes and pre-diabetes and risk factors associated with diabetes in Tanzania and Uganda. *Glob Health Action*. 2016;9:31440.
32. Price AJ, Crampin AC, Amberbir A, Kayuni-Chihana N, Musicha C, Tafatatha T, et al. Prevalence of obesity, hypertension, and diabetes, and cascade of care in sub-Saharan Africa: a cross-sectional, population-based study in rural and urban Malawi. *The Lancet Diabetes & Endocrinology*. 2018;6(3):208-22.
33. Bank AD. The Africa Infrastructure Development Index (AIDI) 2018 2018 [Available from: <https://www.icafrica.org/en/knowledge-hub/article/the-africa-infrastructure-development-index-aidi-2018-358/>].
34. Hall V, Thomsen RW, Henriksen O, Lohse N. Diabetes in Sub Saharan Africa 1999-2011: epidemiology and public health implications. A systematic review. *BMC public health*. 2011;11(1):1-12.
35. Federation ID. IDF Diabetes Atlas. Africa [https://diabetesatlas.org/upload/resources/material/20191218\\_144539\\_afr\\_factsheet\\_en.pdf2019](https://diabetesatlas.org/upload/resources/material/20191218_144539_afr_factsheet_en.pdf2019) [

- 1  
2  
3 36. Federation ID. IDF Diabetes Atlas. Middle East and North Africa  
4 [https://www.diabetesatlas.org/upload/resources/material/20191218\\_144557\\_mena\\_fac](https://www.diabetesatlas.org/upload/resources/material/20191218_144557_mena_fac)  
5 [tsheet\\_en.pdf2019](https://www.diabetesatlas.org/upload/resources/material/20191218_144557_mena_fac) [  
6  
7 37. Utz B, Assarag B, Smekens T, Ennassiri H, Lekhal T, El Ansari N, et al.  
8 Detection and initial management of gestational diabetes through primary health care  
9 services in Morocco: An effectiveness-implementation trial. *PLoS one*.  
10 2018;13(12):e0209322.  
11 38. Webb EM, Rheeder P. A cluster-randomized trial to estimate the effect of  
12 mobile screening and treatment feedback on HbA1c and diabetes-related  
13 complications in Tshwane primary health care clinics, South Africa. *Primary care*  
14 *diabetes*. 2017;11(6):546-54.  
15 39. Webb EM, Rheeder P, Roux P. Screening in Primary Care for Diabetic  
16 Retinopathy, Maculopathy and Visual Loss in South Africa. *Ophthalmologica*.  
17 2016;235(3):141-9.  
18 40. Webb EM, Rheeder P, Van Zyl DG. Diabetes care and complications in primary  
19 care in the Tshwane district of South Africa. *Primary care diabetes*. 2015;9(2):147-54.  
20 41. Krawinkel MB, Ludwig C, Swai ME, Yang RY, Chun KP, Habicht SD. Bitter  
21 gourd reduces elevated fasting plasma glucose levels in an intervention study among  
22 prediabetics in Tanzania. *Journal of Ethnopharmacology*. 2018;216:1-7.  
23 42. RezkAllah SS, Takla MK. Effects of different dosages of interval training on  
24 glycemic control in people with prediabetes: a randomized controlled trial. *Diabetes*  
25 *spectrum*. 2019;32(2):125-31.  
26 43. Mogueo A, Oga-Omenka C, Hatem M, Kuate Defo B. Effectiveness of  
27 interventions based on patient empowerment in the control of type 2 diabetes in  
28 sub-Saharan Africa: A review of randomized controlled trials. *Endocrinology, Diabetes*  
29 *& Metabolism*. e00174.  
30 44. Atun R, Davies JI, Gale EA, Bärnighausen T, Beran D, Kengne AP, et al.  
31 Diabetes in sub-Saharan Africa: from clinical care to health policy. *The lancet Diabetes*  
32 *& endocrinology*. 2017;5(8):622-67.  
33 45. Beck J, Greenwood DA, Blanton L, Bollinger ST, Butcher MK, Condon JE, et al.  
34 2017 National Standards for Diabetes Self-Management Education and Support.  
35 *Diabetes Educ*. 2018;44(1):35-50.  
36 46. Abaza H, Marschollek M, Schulze M. SMS Education for the Promotion of  
37 Diabetes Self-Management in Low & Middle Income Countries: A Randomized  
38 Controlled Trial in Egypt. *Studies in Health Technology & Informatics*. 2017;245:1209.  
39 47. Adibe MO, Ukwe CV, Aguwa CN. The Impact of Pharmaceutical Care  
40 Intervention on the Quality of Life of Nigerian Patients Receiving Treatment for Type 2  
41 Diabetes. *Value in Health Regional Issues*. 2013;2(2):240-7.  
42 48. Adjei DN, Agyemang C, Dasah JB, Kuranchie P, Amoah AG. The effect of  
43 electronic reminders on risk management among diabetic patients in low resourced  
44 settings. *Journal of Diabetes & its Complications*. 2015;29(6):818-21.  
45 49. Amendezo E, Walker Timothy D, Karamuka V, Robinson B, Kavabushi P,  
46 Ntirenganya C, et al. Effects of a lifestyle education program on glycemic control  
47 among patients with diabetes at Kigali University Hospital, Rwanda: A randomized  
48 controlled trial. *Diabetes Research & Clinical Practice*. 2017;126:129-37.  
49 50. Chraibi A, Al-Herz S, Nguyen BD, Soeatmadji DW, Shinde A,  
50 Lakshmivenkataraman B, et al. An RCT Investigating Patient-Driven Versus Physician-  
51 Driven Titration of BIAsp 30 in Patients with Type 2 Diabetes Uncontrolled Using NPH  
52 Insulin.[Erratum appears in *Diabetes Ther*. 2017 Jun 20;; PMID: 28634880]. *Diabetes*  
53 *Therapy Research, Treatment and Education of Diabetes and Related Disorders*.  
54 2017;8(4):767-80.  
55 51. Debussche X, Besancon S, Balcou-Debussche M, Ferdynus C, Delisle H,  
56 Huiart L, et al. Structured peer-led diabetes self-management and support in a low-  
57 income country: The ST2EP randomised controlled trial in Mali. *PLoS ONE* [Electronic  
58 Resource]. 2018;13(1):e0191262.  
59  
60

- 1  
2  
3 52. Essien O, Otu A, Umoh V, Enang O, Hicks JP, Walley J. Intensive Patient  
4 Education Improves Glycaemic Control in Diabetes Compared to Conventional  
5 Education: A Randomised Controlled Trial in a Nigerian Tertiary Care Hospital. *PLoS*  
6 *ONE* 2017;12(1):e0168835.
- 7 53. Hailu FB, Hjortdahl P, Moen A. Nurse-Led Diabetes Self-Management  
8 Education Improves Clinical Parameters in Ethiopia. *Frontiers in Public Health*.  
9 2018;6:302.
- 10 54. Labhardt ND, Balo JR, Ndam M, Manga E, Stoll B. Improved retention rates  
11 with low-cost interventions in hypertension and diabetes management in a rural African  
12 environment of nurse-led care: a cluster-randomised trial. *Tropical Medicine &*  
13 *International Health*. 2011;16(10):1276-84.
- 14 55. Mash RJ, Rhode H, Zwarenstein M, Rollnick S, Lombard C, Steyn K, et al.  
15 Effectiveness of a group diabetes education programme in under-served communities  
16 in South Africa: a pragmatic cluster randomized controlled trial. *Diabetic Medicine*.  
17 2014;31(8):987-93.
- 18 56. Takenga C, Berndt RD, Musongya O, Kitero J, Katoke R, Molo K, et al. An ICT-  
19 Based Diabetes Management System Tested for Health Care Delivery in the African  
20 Context. *International Journal of Telemedicine & Applications*. 2014;2014:437307.
- 21 57. Tawfik MY, Mohamed RA. The impact of communicating cardiovascular risk in  
22 type 2 diabetics on patient risk perception, diabetes self-care, glycosylated hemoglobin,  
23 and cardiovascular risk. *Journal of public health (germany)*. 2016;24(2):153-64.
- 24 58. Thuita AW, Kiage BN, Onyango AN, Makokha AO. Effect of a nutrition  
25 education programme on the metabolic syndrome in type 2 diabetes mellitus patients  
26 at a level 5 Hospital in Kenya: "a randomized controlled trial". *BMC Nutr*. 2020;6:30.
- 27 59. Malipa M, Menon J. The relationship between compliance and quality of life  
28 among adolescents with diabetes mellitus type1. *Medical Journal of Zambia*.  
29 2013;40(3):93-103.
- 30 60. Adibe MO, Aguwa CN, Ukwe CV. Cost-Utility Analysis of Pharmaceutical Care  
31 Intervention Versus Usual Care in Management of Nigerian Patients with Type 2  
32 Diabetes. *Value in Health Regional Issues*. 2013;2(2):189-98.
- 33 61. Fairall LR, Folb N, Timmerman V, Lombard C, Steyn K, Bachmann MO, et al.  
34 Educational Outreach with an Integrated Clinical Tool for Nurse-Led Non-  
35 communicable Chronic Disease Management in Primary Care in South Africa: a  
36 Pragmatic Cluster Randomised Controlled Trial. *Plos medicine*. 2016;13(11):e1002178.
- 37 62. Steyn K, Lombard C, Gwebushe N, Fourie JM, Everett-Murphy K, Zwarenstein  
38 M, et al. Implementation of national guidelines, incorporated within structured diabetes  
39 and hypertension records at primary level care in Cape Town, South Africa: a  
40 randomised controlled trial. *Glob Health Action*. 2013;6:20796.
- 41 63. Ragheb SR, El Wakeel LM, Nasr MS, Sabri NA. Impact of Rutin and Vitamin C  
42 combination on oxidative stress and glycemic control in patients with type 2 diabetes.  
43 *Clinical nutrition ESPEN*. 2020;35:128-35.
- 44 64. Advisor E. Telemedicine for Diabetes Management During the COVID-19  
45 Pandemic and Beyond Telemedicine for Diabetes Management During the COVID-19  
46 Pandemic and Beyond - *Endocrinology Advisor*.2020 [
- 47 65. Tchero H, Kangambega P, Briatte C, Brunet-Houdard S, Retali G-R, Rusch E.  
48 Clinical effectiveness of telemedicine in diabetes mellitus: a meta-analysis of 42  
49 randomized controlled trials. *Telemedicine and e-Health*. 2019;25(7):569-83.
- 50 66. Haider R, Sudini L, Chow CK, Cheung NW. Mobile phone text messaging in  
51 improving glycaemic control for patients with type 2 diabetes mellitus: A systematic  
52 review and meta-analysis. *Diabetes research and clinical practice*. 2019;150:27-37.
- 53 67. Russo LM, Nobles C, Ertel KA, Chasan-Taber L, Whitcomb BW. Physical  
54 activity interventions in pregnancy and risk of gestational diabetes mellitus: a  
55 systematic review and meta-analysis. *Obstetrics & Gynecology*. 2015;125(3):576-82.
- 56  
57  
58  
59  
60



- 1  
2  
3 68. Quirk H, Blake H, Tennyson R, Randell T, Glazebrook C. Physical activity  
4 interventions in children and young people with type 1 diabetes mellitus: a systematic  
5 review with meta-analysis. *Diabetic Medicine*. 2014;31(10):1163-73.
- 6 69. Aljawarneh YM, Wardell DW, Wood GL, Rozmus CL. A systematic review of  
7 physical activity and exercise on physiological and biochemical outcomes in children  
8 and adolescents with type 1 diabetes. *Journal of Nursing Scholarship*. 2019;51(3):337-  
9 45.
- 10 70. Pan B, Ge L, Xun Y-q, Chen Y-j, Gao C-y, Han X, et al. Exercise training  
11 modalities in patients with type 2 diabetes mellitus: a systematic review and network  
12 meta-analysis. *International Journal of Behavioral Nutrition and Physical Activity*.  
13 2018;15(1):72.
- 14 71. Smith AD, Crippa A, Woodcock J, Brage S. Physical activity and incident type 2  
15 diabetes mellitus: a systematic review and dose-response meta-analysis of  
16 prospective cohort studies. Springer; 2016.
- 17 72. Fayehun AF, Olowookere OO, Ogunbode AM, Adetunji AA, Esan A. Walking  
18 prescription of 10 000 steps per day in patients with type 2 diabetes mellitus: a  
19 randomised trial in Nigerian general practice. *British Journal of General Practice*.  
20 2018;68(667):e139-e45.
- 21 73. Maharaj SS, Nuhu JM. Rebound exercise: A beneficial adjuvant for sedentary  
22 non-insulin-dependent type 2 diabetic individuals in a rural environment. *Australian  
23 Journal of Rural Health*. 2016;24(2):123-9.
- 24 74. van Rooijen AJ, Rheeder P, Eales CJ, Becker PJ. Effect of exercise versus  
25 relaxation on haemoglobin A1C in Black females with type 2 diabetes mellitus. *Qjm*.  
26 2004;97(6):343-51.
- 27 75. Yan H, Prista A, Ranadive SM, Damasceno A, Caupers P, Kanaley JA, et al.  
28 Effect of Aerobic Training on Glucose Control and Blood Pressure in T2DDM East  
29 African Males. *Isrn Endocrinology Print*. 2014;2014:864897.
- 30 76. Salem MA, Aboelasrar MA, Elbarbary NS, Elhilaly RA, Refaat YM. Is exercise a  
31 therapeutic tool for improvement of cardiovascular risk factors in adolescents with type  
32 1 diabetes mellitus? A randomised controlled trial. *Diabetology & metabolic syndrome*.  
33 2010;2(1):47.
- 34 77. Embaby H, Elsayed E, Fawzy M. Insulin Sensitivity and Plasma Glucose  
35 Response to Aerobic Exercise in Pregnant Women at Risk for Gestational Diabetes  
36 Mellitus. *Ethiopian journal of health sciences*. 2016;26(5):409-14.
- 37 78. Distiller LA, Nortje H, Wellmann H, Amod A, Lombard L. A 24-week,  
38 prospective, randomized, open-label, treat-to-target pilot study of obese type 2  
39 diabetes patients with severe insulin resistance to assess the addition of exenatide on  
40 the efficacy of U-500 regular insulin plus metformin. *Endocrine practice*.  
41 2014;20(11):1143-50.
- 42 79. El-Haggag SM, Farrag WF, Kotkata FA. Effect of ketotifen in obese patients with  
43 type 2 diabetes mellitus. *Journal of Diabetes & its Complications*. 2015;29(3):427-32.
- 44 80. Malek R, Ajili F, Assaad-Khalil SH, Shinde A, Chen JW, Van den Berg E.  
45 Similar glucose control with basal-bolus regimen of insulin detemir plus insulin aspart  
46 and thrice-daily biphasic insulin aspart 30 in insulin-naive patients with type 2 diabetes:  
47 Results of a 50-week randomized clinical trial of stepwise insulin intensification.  
48 *Diabetes & Metabolism*. 2015;41(3):223-30.
- 49 81. Ashoush S, El-Said M, Fathi H, Abdelnaby M. Identification of metformin poor  
50 responders, requiring supplemental insulin, during randomization of metformin versus  
51 insulin for the control of gestational diabetes mellitus. *Journal of obstetrics and  
52 gynaecology research*. 2016;42(6):640-7.
- 53 82. Beyuo T, Obed SA, Adjepong-Yamoah KK, Bugyei KA, Oppong SA, Marfoh K.  
54 Metformin versus Insulin in the Management of Pre-Gestational Diabetes Mellitus in  
55 Pregnancy and Gestational Diabetes Mellitus at the Korle Bu Teaching Hospital: A  
56 Randomized Clinical Trial. *PLoS ONE [Electronic Resource]*. 2015;10(5):e0125712.  
57  
58  
59  
60

- 1  
2  
3 83. Ibrahim MI, Hamdy A, Shafik A, Taha S, Anwar M, Faris M. The role of adding metformin in insulin-resistant diabetic pregnant women: a randomized controlled trial. *Archives of Gynecology & Obstetrics*. 2014;289(5):959-65.
- 4  
5  
6 84. Cosentino F, Grant PJ, Aboyans V, Bailey CJ, Ceriello A, Delgado V, et al. 2019 ESC Guidelines on diabetes, pre-diabetes, and cardiovascular diseases developed in collaboration with the EASD. *Eur Heart J*. 2020;41(2):255-323.
- 7  
8  
9 85. Bailey CJ, Iqbal N, T'Joene C, List JF. Dapagliflozin monotherapy in drug-naive patients with diabetes: a randomized-controlled trial of low-dose range. *Diabetes, Obesity & Metabolism*. 2012;14(10):951-9.
- 10  
11  
12 86. Chou HS, Truitt KE, Moberly JB, Merante D, Choi Y, Mun Y, et al. A 26-week, placebo- and pioglitazone-controlled monotherapy study of rivoglitazone in subjects with type 2 diabetes mellitus. *Diabetes, Obesity & Metabolism*. 2012;14(11):1000-9.
- 13  
14  
15 87. De Caterina R, Andersson U, Alexander JH, Al-Khatib SM, Bahit MC, Goto S, et al. History of bleeding and outcomes with apixaban versus warfarin in patients with atrial fibrillation in the Apixaban for Reduction in Stroke and Other Thromboembolic Events in Atrial Fibrillation trial. *American Heart Journal*. 2016;175:175-83.
- 16  
17  
18 88. Kadiri A, Al-Nakhi A, El-Ghazali S, Jabbar A, Al Arouj M, Akram J, et al. Treatment of type 1 diabetes with insulin lispro during Ramadan. *Diabetes & metabolism*. 2001;27(4 Pt 1):482-6.
- 19  
20  
21 89. Schumm-Draeger PM, Burgess L, Koranyi L, Hrubá V, Hamer-Maansson JE, de Bruin TW. Twice-daily dapagliflozin co-administered with metformin in type 2 diabetes: a 16-week randomized, placebo-controlled clinical trial. *Diabetes, Obesity & Metabolism*. 2015;17(1):42-51.
- 22  
23  
24 90. Van Olmen J, Van Pelt M, Malombo B, Ku GM, Kanda D, Heang H, et al. Process evaluation of a mobile health intervention for people with diabetes in low income countries - the implementation of the TEXT4DSM study. *Journal of Telemedicine & Telecare*. 2017;23(1):96-105.
- 25  
26  
27 91. Wang C, Mamza J, Idris I. Biphasic vs basal bolus insulin regimen in type 2 diabetes: a systematic review and meta-analysis of randomized controlled trials. *Diabetic Medicine*. 2015;32(5):585-94.
- 28  
29  
30 92. Meece J. Basal insulin intensification in patients with type 2 diabetes: a review. *Diabetes Therapy*. 2018;9(3):877-90.
- 31  
32  
33 93. Heinemann L, Braune K, Carter A, Zayani A, Krämer LA. Insulin storage: a critical reappraisal. *Journal of Diabetes Science and Technology*. 2020:1932296819900258.
- 34  
35  
36 94. Bahendeka S, Kaushik R, Swai AB, Otieno F, Bajaj S, Kalra S, et al. EADSG guidelines: insulin storage and optimisation of injection technique in diabetes management. *Diabetes Therapy*. 2019;10(2):341-66.
- 37  
38  
39 95. Asamoah EA, Obirikorang C, Acheampong E, Annani-Akollor ME, Laing EF, Owiredu E-W, et al. Heritability and Genetics of Type 2 Diabetes Mellitus in Sub-Saharan Africa: A Systematic Review and Meta-Analysis. *Journal of diabetes research*. 2020;2020.
- 40  
41  
42 96. Onengut-Gumuscu S, Chen WM, Robertson CC, Bonnie JK, Farber E, Zhu Z, et al. Type 1 Diabetes Risk in African-Ancestry Participants and Utility of an Ancestry-Specific Genetic Risk Score. *Diabetes Care*. 2019;42(3):406-15.
- 43  
44  
45 97. Cheng C-Y, Reich D, Haiman CA, Tandon A, Patterson N, Elizabeth S, et al. African ancestry and its correlation to type 2 diabetes in African Americans: a genetic admixture analysis in three US population cohorts. *PLoS one*. 2012;7(3):e32840.
- 46  
47  
48 98. Ng MC, Shriner D, Chen BH, Li J, Chen W-M, Guo X, et al. Meta-analysis of genome-wide association studies in African Americans provides insights into the genetic architecture of type 2 diabetes. *PLoS Genet*. 2014;10(8):e1004517.
- 49  
50  
51 99. Jayawardena R, Ranasinghe P, Galappaththy P, Malkanthi R, Constantine G, Katulanda P. Effects of zinc supplementation on diabetes mellitus: a systematic review and meta-analysis. *Diabetology & metabolic syndrome*. 2012;4(1):13.
- 52  
53  
54  
55  
56  
57  
58  
59  
60

- 1  
2  
3 100. Wang X, Wu W, Zheng W, Fang X, Chen L, Rink L, et al. Zinc supplementation  
4 improves glycemic control for diabetes prevention and management: a systematic  
5 review and meta-analysis of randomized controlled trials. *The American Journal of*  
6 *Clinical Nutrition*. 2019;110(1):76-90.
- 7 101. Daily JW, Yang M, Kim DS, Park S. Efficacy of ginger for treating Type 2  
8 diabetes: A systematic review and meta-analysis of randomized clinical trials. *Journal*  
9 *of Ethnic Foods*. 2015;2(1):36-43.
- 10 102. Zhu J, Chen H, Song Z, Wang X, Sun Z. Effects of ginger (*Zingiber officinale*  
11 *Roscoe*) on type 2 diabetes mellitus and components of the metabolic syndrome: A  
12 systematic review and meta-analysis of randomized controlled trials. *Evidence-based*  
13 *complementary and alternative medicine*. 2018;2018.
- 14 103. Daryabeygi-Khotbehsara R, Golzarand M, Ghaffari MP, Djafarian K. *Nigella*  
15 *sativa* improves glucose homeostasis and serum lipids in type 2 diabetes: A systematic  
16 review and meta-analysis. *Complementary therapies in medicine*. 2017;35:6-13.
- 17 104. Heshmati J, Namazi N. Effects of black seed (*Nigella sativa*) on metabolic  
18 parameters in diabetes mellitus: A systematic review. *Complementary therapies in*  
19 *medicine*. 2015;23(2):275-82.
- 20 105. Vidal-Casariago A, Burgos-Peláez R, Martínez-Faedo C, Calvo-Gracia F,  
21 Valero-Zanuy M, Luengo-Pérez L, et al. Metabolic effects of L-carnitine on type 2  
22 diabetes mellitus: systematic review and meta-analysis. *Experimental and clinical*  
23 *endocrinology & diabetes*. 2013;121(04):234-8.
- 24 106. Xu Y, Jiang W, Chen G, Zhu W, Ding W, Ge Z, et al. L-carnitine treatment of  
25 insulin resistance: A systematic review and meta-analysis. *Advances in Clinical and*  
26 *Experimental Medicine*. 2017;26(2):333-8.
- 27 107. Das UN. Vitamin C for Type 2 Diabetes Mellitus and Hypertension. *Archives of*  
28 *medical research*. 2019;50(2):11-4.
- 29 108. Afkhami-Ardekani M, Shojaoddiny-Ardekani A. Effect of vitamin C on blood  
30 glucose, serum lipids & serum insulin in type 2 diabetes patients. *Indian Journal of*  
31 *medical research*. 2007;126(5):471.
- 32 109. Maritim A, Sanders a, Watkins lii J. Diabetes, oxidative stress, and antioxidants:  
33 a review. *Journal of biochemical and molecular toxicology*. 2003;17(1):24-38.
- 34 110. Zhou C, Na L, Shan R, Cheng Y, Li Y, Wu X, et al. Dietary vitamin C intake  
35 reduces the risk of type 2 diabetes in Chinese adults: HOMA-IR and T-AOC as  
36 potential mediators. *Plos one*. 2016;11(9):e0163571.
- 37 111. Hosseinzadeh H, Nassiri-Asl M. Review of the protective effects of rutin on the  
38 metabolic function as an important dietary flavonoid. *Journal of endocrinological*  
39 *investigation*. 2014;37(9):783-8.
- 40 112. Abdulrhman MM, El-Hefnawy MH, Aly RH, Shatla RH, Mamdouh RM,  
41 Mahmoud DM, et al. Metabolic effects of honey in type 1 diabetes mellitus: a  
42 randomized crossover pilot study. *Journal of Medicinal Food*. 2013;16(1):66-72.
- 43 113. Mohamad RH, Zekry ZK, Al-Mehdar HA, Salama O, El-Shaieb SE, El-Basmy  
44 AA, et al. Camel milk as an adjuvant therapy for the treatment of type 1 diabetes:  
45 verification of a traditional ethnomedical practice. *Journal of Medicinal Food*.  
46 2009;12(2):461-5.
- 47 114. van der Hoogt M, van Dyk JC, Dolman RC, Pieters M. Protein and fat meal  
48 content increase insulin requirement in children with type 1 diabetes - Role of duration  
49 of diabetes. *Journal of clinical and translational endocrinology*. 2017;10:15-21.
- 50 115. Shori AB. Camel milk as a potential therapy for controlling diabetes and its  
51 complications: A review of in vivo studies. *Journal of food and drug analysis*.  
52 2015;23(4):609-18.
- 53 116. Rashad H, Metwally FM, Ezzat SM, Salama MM, Hasheesh A, Abdel Motaal A.  
54 Randomized double-blinded pilot clinical study of the antidiabetic activity of *Balanites*  
55 *aegyptiaca* and UPLC-ESI-MS/MS identification of its metabolites. *Pharmaceutical*  
56 *Biology*. 2017;55(1):1954-61.
- 57  
58  
59  
60

- 1  
2  
3 117. Helal EG, El-Wahab A, Samia M, El Refaey H, Mohammad AA. Antidiabetic and  
4 antihyperlipidemic effect of *Balanites aegyptiaca* seeds (aqueous extract) on diabetic  
5 rats. *The Egyptian Journal of Hospital Medicine*. 2013;52(1):725-39.
- 6 118. Matter RM, Elbarbary NS, Ismail EAR, Darwish YW, Nada AS, Banoub VP. Zinc  
7 supplementation improves glucose homeostasis in patients with  $\beta$ -thalassemia major  
8 complicated with diabetes mellitus: a randomized controlled trial. *Nutrition (Burbank,*  
9 *Los Angeles County, Calif)*. 2020;73.
- 10 119. Anderson RA, Roussel AM, Zouari N, Mahjoub S, Matheau JM, Kerkeni A.  
11 Potential antioxidant effects of zinc and chromium supplementation in people with type  
12 2 diabetes mellitus. *Journal of the American College of Nutrition*. 2001;20(3):212-8.
- 13 120. El Gayar MH, Aboromia MMM, Ibrahim NA, Abdel Hafiz MH. Effects of ginger  
14 powder supplementation on glycemic status and lipid profile in newly diagnosed obese  
15 patients with type 2 diabetes mellitus. *Obesity medicine*. 2019;14.
- 16 121. Moustafa HAM, El Wakeel LM, Halawa MR, Sabri NA, El-Bahy AZ, Singab AN.  
17 Effect of *Nigella Sativa* oil versus metformin on glycemic control and biochemical  
18 parameters of newly diagnosed type 2 diabetes mellitus patients. *Endocrine*.  
19 2019;65(2):286-94.
- 20 122. El-Sheikh HM, El-Haggag SM, Elbedewy TA. Comparative study to evaluate the  
21 effect of L-carnitine plus glimepiride versus glimepiride alone on insulin resistance in  
22 type 2 diabetic patients. *Diabetes and metabolic syndrome: clinical research and*  
23 *reviews*. 2019;13(1):167-73.
- 24 123. Elbarbary NS, Ismail EAR, El-Naggag AR, Hamouda MH, El-Hamamsy M. The  
25 effect of 12 weeks carnosine supplementation on renal functional integrity and  
26 oxidative stress in pediatric patients with diabetic nephropathy: a randomized placebo-  
27 controlled trial. *Pediatric diabetes*. 2018;19(3):470-7.
- 28 124. Ali S, Ghanem Y, Sharaki O, Hewedy W, al. e. The impact of different regimens  
29 of vitamin d3 on glucose homeostasis in type 2 diabetic patients. *Asian journal of*  
30 *pharmaceutical and clinical research*. 2019;12(12):21-6.
- 31 125. Elbarbary NS, Ismail EAR, Zaki MA, Darwish YW, Ibrahim MZ, El-Hamamsy M.  
32 Vitamin B complex supplementation as a homocysteine-lowering therapy for early  
33 stage diabetic nephropathy in pediatric patients with type 1 diabetes: A randomized  
34 controlled trial. *Clinical Nutrition*. 2020;39(1):49-56.
- 35 126. Anyanwu AC, Fasanmade OA, Odeniyi IA, Iwuala S, Coker HB, Ohwovoriole  
36 AE. Effect of Vitamin D supplementation on glycemic control in Type 2 diabetes  
37 subjects in Lagos, Nigeria. *Indian Journal of Endocrinology and Metabolism*.  
38 2016;20(2):189-94.
- 39 127. El-Makaky Y, Shalaby HK. The effects of non-surgical periodontal therapy on  
40 glycemic control in diabetic patients: a randomized controlled trial. *Oral diseases*.  
41 2020;26:822-9.
- 42 128. El-Sharkawy HM, Anees MM, Van Dyke TE. Propolis improves periodontal  
43 status and glycemic control in patients with type 2 diabetes mellitus and chronic  
44 periodontitis: a randomized clinical trial. *Journal of periodontology*. 2016;87(12):1418-  
45 26.
- 46 129. Tsohgny-Tsague NF, Lontchi-Yimagou E, Nana ARN, Tankeu AT, Katte JC,  
47 Dehayem MY, et al. Effects of nonsurgical periodontal treatment on glycosylated  
48 haemoglobin on type 2 diabetes patients (PARODIA 1 study): a randomized controlled  
49 trial in a sub-Saharan Africa population. *BMC Oral Health*. 2018;18(1):28.
- 50 130. Sahile AT, Mgutshini T, Ayehu SM. Oral Health Screening Status of Diabetes  
51 Patients in Selected Hospitals of Addis Ababa, Ethiopia, 2018. *Patient Related*  
52 *Outcome Measures*. 2020;11:173.
- 53 131. Organization WH. Promoting Oral Health in Africa: Prevention and control of  
54 oral diseases and noma as part of essential noncommunicable disease interventions.  
55 2016.
- 56  
57  
58  
59  
60

- 1  
2  
3 132. Nteleki B, Abrahamse H, Houreld NN. Conventional podiatric intervention and  
4 phototherapy in the treatment of diabetic ulcers. *Seminars in Vascular Surgery*.  
5 2015;28(3-4):172-83.
- 6 133. Yakoot M, Abdelatif M, Helmy S. Efficacy of a new local limb salvage treatment  
7 for limb-threatening diabetic foot wounds-a randomized controlled study. *Diabetes,*  
8 *Metabolic Syndrome and Obesity: Targets and Therapy*. 2019;12:1659.
- 9 134. Wang HT, Yuan JQ, Zhang B, Dong ML, Mao C, Hu D. Phototherapy for  
10 treating foot ulcers in people with diabetes. *Cochrane Database of Systematic*  
11 *Reviews*. 2017(6).
- 12 135. Henshaw FR, Bolton T, Nube V, Hood A, Veldhoen D, Pfrunder L, et al. Topical  
13 application of the bee hive protectant propolis is well tolerated and improves human  
14 diabetic foot ulcer healing in a prospective feasibility study. *Journal of Diabetes and its*  
15 *Complications*. 2014;28(6):850-7.
- 16 136. Afkhamizadeh M, Aboutorabi R, Ravari H, Fathi Najafi M, Ataei Azimi S,  
17 Javadian Langaroodi A, et al. Topical propolis improves wound healing in patients with  
18 diabetic foot ulcer: a randomized controlled trial. *Natural product research*.  
19 2018;32(17):2096-9.
- 20 137. Hegazi R, El-Gamal M, Abdel-Hady N, Hamdy O. Epidemiology of and risk  
21 factors for type 2 diabetes in Egypt. *Ann Glob Health*. 2015;81(6):814-20.
- 22 138. Sherwani SI, Khan HA, Ekhzaimy A, Masood A, Sakharkar MK. Significance of  
23 HbA1c test in diagnosis and prognosis of diabetic patients. *Biomarker insights*.  
24 2016;11:BMI. S38440.
- 25 139. Basu S, Flood D, Geldsetzer P, Theilmann M, Marcus ME, Ebert C, et al.  
26 Estimated effect of increased diagnosis, treatment, and control of diabetes and its  
27 associated cardiovascular risk factors among low-income and middle-income countries:  
28 a microsimulation model. *Lancet Glob Health*. 2021;9(11):e1539-e52.
- 29 140. Medicine OCfE-B. "The Oxford 2011 Levels of Evidence".  
30 <https://www.cebm.net/wp-content/uploads/2014/06/CEBM-Levels-of-Evidence-2.1.pdf>;  
31 2011 [  
32  
33  
34 141. Maho JF. How many languages are there in Africa, really? *TRENDS IN*  
35 *LINGUISTICS STUDIES AND MONOGRAPHS*. 2004;156:279-96.
- 36  
37  
38  
39  
40  
41  
42  
43  
44  
45  
46  
47  
48  
49  
50  
51  
52  
53  
54  
55  
56  
57  
58  
59  
60





review only



peer review only





For peer review only

Studies on patients with pre-DM

| Study name                                                  | Setting                            | Population                                                                                                                                                                                                                                                                                                                                                                       | Intervention vs. Control                                                                                                                                                                                                                                                                                                                                                                          | Outcomes                                                                        | Results                                                                                                                                                                                                                                                                                                      |
|-------------------------------------------------------------|------------------------------------|----------------------------------------------------------------------------------------------------------------------------------------------------------------------------------------------------------------------------------------------------------------------------------------------------------------------------------------------------------------------------------|---------------------------------------------------------------------------------------------------------------------------------------------------------------------------------------------------------------------------------------------------------------------------------------------------------------------------------------------------------------------------------------------------|---------------------------------------------------------------------------------|--------------------------------------------------------------------------------------------------------------------------------------------------------------------------------------------------------------------------------------------------------------------------------------------------------------|
| registration number Design                                  | Place, setting and time            | Inclusion / Exclusion criteria Characteristics                                                                                                                                                                                                                                                                                                                                   | Description with duration                                                                                                                                                                                                                                                                                                                                                                         | Primary and secondary                                                           | Longest follow-up period with intervention effects (IG vs. CG) with SD, 95%-CI or p value                                                                                                                                                                                                                    |
| <b>Strategies to enhance physical activity</b>              |                                    |                                                                                                                                                                                                                                                                                                                                                                                  |                                                                                                                                                                                                                                                                                                                                                                                                   |                                                                                 |                                                                                                                                                                                                                                                                                                              |
| <b>RezkAllah 2019</b><br>ACTRN126170<br>00631303<br>RCT     | Egypt, urban<br>07/2017-01/2018    | Pre-DM, 25-45 yrs, BMI of 25–30 kg/m2, HbA1C 5.7–6.4%, fasting glucose 100–125 mg/dL, sedentary lifestyle<br><br>No history of diabetes, cancer, prediabetic neuropathy, stroke, pulmonary embolism, or severe musculoskeletal problems restricting physical activity                                                                                                            | n=60<br>45 % females<br>age (yrs): 32.9±5.5<br>BMI (kg/m²): 28.3±1.4<br><br><u>IG2 (n=20):</u><br>High-volume high intensity interval training, 40 min/session<br><br><u>IG1 (n=20):</u><br>Low-volume high intensity interval training, 25 min/session<br>Both with 90 % HR maximum, 3 times/week<br><u>CG (n=20):</u><br>No exercise intervention<br><u>Duration:</u> 12 weeks                  | <u>Primary:</u> HbA1c<br><u>Other:</u> fasting glucose                          | After 3 months<br><u>HbA1c (%)</u> :<br>Benefit for IG2 and IG1: Benefit for IG: 4.87±0.34 (-26 %) vs. 5.13±0.57 (-14.5 %) vs. 6.25±0.48 (+3.38 %) (p=0.0001)<br><u>fasting glucose (mg/dL)</u> :<br>Benefit for IG2 and IG1: 90.8±4.13 (-17.8 %) vs. 93.8±4.16 (-13.2 %) vs. 103.8±7.21 (+2.9 %) (p=0.0001) |
| <b>Strategies on nutrition</b>                              |                                    |                                                                                                                                                                                                                                                                                                                                                                                  |                                                                                                                                                                                                                                                                                                                                                                                                   |                                                                                 |                                                                                                                                                                                                                                                                                                              |
| <b>Krawinkel 2018</b><br>DRKS<br>00005131<br>Cross-over-RCT | Tanzania, urban<br>10/2013-03/2014 | Individuals with pre-DM age (yrs): 30 -65, FPG 5.6-6.9 mmol/l (100–125 mg/dL) on 2 days or on one day + HbA1c 5.7-7.5 %, BMI 27–35 kg/m², BP 90/60-160/110 mmHg, waist circumference > 80/90 cm for women / men<br><br>No chronic disease, taking regular intake of medication, identified glucose-6-phosphatase-dehydrogenase deficiency, heavy alcohol consumption, pregnancy, | n=52<br>55% female<br>age (yrs): 47.5±8.7<br>HbA1c (%):5.85±0.43<br>FPG: (mmol/l): 5.34±0.49<br>BMI (kg/m²):29.6±2.2<br><br><u>IG/CG (n=30):</u><br>started with bitter gourd supplementation (2,5 g) over 8 wks, followed by placebo over 8 wks<br><br><u>CG/IG (n=31):</u><br>first placebo over 8 wks, followed by bitter gourd over 8 wks<br>washout period: 4 wks<br><u>Duration</u> 8 weeks | <u>Primary:</u><br>FPG<br><u>Secondary:</u><br>HbA1c, Insulin, SBP, DBP, lipids | after 8 wks<br><u>FPG (mmol/l)</u> :<br>Benefit for IG/CG: MD 0.31 (0.08-0.54)<br><u>HbA1c: (%)</u> :<br>No differences (MD 0.05)                                                                                                                                                                            |

| Study name                                                                                                                                                                                                                                                                                                                                                                                                                           | Setting                 | Population                                        | Intervention vs. Control  | Outcomes              | Results                                                                                   |
|--------------------------------------------------------------------------------------------------------------------------------------------------------------------------------------------------------------------------------------------------------------------------------------------------------------------------------------------------------------------------------------------------------------------------------------|-------------------------|---------------------------------------------------|---------------------------|-----------------------|-------------------------------------------------------------------------------------------|
| registration number<br>Design                                                                                                                                                                                                                                                                                                                                                                                                        | Place, setting and time | Inclusion / Exclusion criteria<br>Characteristics | Description with duration | Primary and secondary | Longest follow-up period with intervention effects (IG vs. CG) with SD, 95%-CI or p value |
| lactation                                                                                                                                                                                                                                                                                                                                                                                                                            |                         |                                                   |                           |                       |                                                                                           |
| BMI: Body mass index; CG: Control group; CG/IG: Crossover from CG to IG; CI: Confidence interval; DBP: Diastolic blood pressure; DM: diabetes mellitus; FPG: fasting plasma glucose; HbA1c: haemoglobin A1c; IG/CG: cross over from IG to CG; IG: intervention group; n: number of participants; MD: mean difference; RCT: randomized controlled trial; SBP: Systolic blood pressure; SD: Standard-deviation; wks: weeks; yrs: years |                         |                                                   |                           |                       |                                                                                           |

**Supplementary Table 1:** Characteristics and results of studies on patients with pre-DM

Studies on patients with DM1

| Study name                                          | Setting                                      | Population                                                                                                                                                                                                                                                       | Intervention vs. Control                                                                                                                                                                                 | Outcomes                                                                                                                                                                                         | Results                                                                                                                                      |                                                                                                                                                                                                                                                                     |
|-----------------------------------------------------|----------------------------------------------|------------------------------------------------------------------------------------------------------------------------------------------------------------------------------------------------------------------------------------------------------------------|----------------------------------------------------------------------------------------------------------------------------------------------------------------------------------------------------------|--------------------------------------------------------------------------------------------------------------------------------------------------------------------------------------------------|----------------------------------------------------------------------------------------------------------------------------------------------|---------------------------------------------------------------------------------------------------------------------------------------------------------------------------------------------------------------------------------------------------------------------|
| registration number Design                          | Place, setting and time                      | Inclusion / Exclusion criteria Characteristics                                                                                                                                                                                                                   | Description with duration                                                                                                                                                                                | Primary and secondary                                                                                                                                                                            | Longest follow-up period with intervention effects (IG vs. CG) with SD, 95%-CI or p value                                                    |                                                                                                                                                                                                                                                                     |
| <b>Educational strategies</b>                       |                                              |                                                                                                                                                                                                                                                                  |                                                                                                                                                                                                          |                                                                                                                                                                                                  |                                                                                                                                              |                                                                                                                                                                                                                                                                     |
| <b>Malipa 2013</b><br>RCT                           | Zambia                                       | DM1, 16-19 yrs                                                                                                                                                                                                                                                   | n=40<br>55% females<br>16-17 yrs: 35 %<br>18-19 yrs: 65 %<br>Compliance: worse in IG 26.4 vs. 14.6 (p=0.001)<br>Impact of diabetes: 20.5<br>Worries about diabetes: 20.5<br>Satisfaction with life: 20.5 | <u>IG (n=20):</u> 1 meeting /wk over 8 wks<br><u>CG (n=20):</u> waiting list<br><u>Duration:</u> 8 wks                                                                                           | Compliance to treatment (Rating scale for compliance)<br>Quality of life (impact and worries about diabetes, satisfaction with life)         | After 2 months:<br>Compliance: better in IG (11.0 vs. 30; p<0.001)<br>Impact of diabetes: better in IG (16.8 vs. 24.2; p=0.045)<br>Worries about diabetes: better in IG (14.32 vs. 26.68; p=0.001)<br>Satisfaction with life: better in IG (28.5 vs. 12.5; p<0.001) |
| <b>Strategies to enhance physical activity</b>      |                                              |                                                                                                                                                                                                                                                                  |                                                                                                                                                                                                          |                                                                                                                                                                                                  |                                                                                                                                              |                                                                                                                                                                                                                                                                     |
| <b>Salem 2010</b><br>RCT                            | Egypt, urban<br><br>02/2009-11/2009          | DM1 for ≥3 years, 12-18 yrs, HbA1c ≥7.5 % for ≥6 months<br><br>no significant diabetic complications limiting exercise like, uncontrolled hypertension, diabetic keto-acidosis, severe hypoglycemia within the past 3 months, patients on lipid lowering therapy | n=196<br>61.7 % female<br>age (yrs): 14.78 ± 2.31<br>HbA1c (%): 8.7±1.7<br>duration of diabetes (yrs): 4.6 ± 1.9                                                                                         | <u>IG2 (n=73):</u> attended exercise sessions three times/week vs. <u>IG 1 (n=75):</u> attended exercise sessions once times/week vs. <u>CG (n=48):</u> no exercise<br><u>Duration: 6 months</u> | glycemic control, plasma lipids values, blood pressure, severity and frequency of hypoglycemia, anthropometric measurements and insulin dose | Change over 6 months: <u>HbA1c (%)</u> : Benefit for IG2 and IG1: 7.8 ± 1.0 vs. 8.1 ± 1.1 vs. 8.9 ± 1.3% (p=0.2)                                                                                                                                                    |
| <b>Strategies on nutrition</b>                      |                                              |                                                                                                                                                                                                                                                                  |                                                                                                                                                                                                          |                                                                                                                                                                                                  |                                                                                                                                              |                                                                                                                                                                                                                                                                     |
| <b>Abdulrhman 2013</b><br>NCT01554566<br>Cross-over | Egypt, urban, tertiary care<br><br>01/2010 - | DM1, age > 2 yrs, HbA1c< 10 %<br><br>no renal or hepatic impairment, coexisting                                                                                                                                                                                  | n=20<br>50 % females<br>age (yrs): 11.3 ± 4.3<br>duration of diabetes (yrs): 4.7±4.5                                                                                                                     | <u>IG/ CG (n=10):</u> Honey consumption (0.5 ml/kg body weight per day) vs.                                                                                                                      | <u>Primary:</u> serum lipids, c-peptide<br><u>Secondary:</u> anthropometric measures (e.g. BMI), fasting and 2h-                             | After 12 weeks: (IG/CG vs. CG/IG): <u>HbA1c (%)</u> :<br>Benefit with CG/IG: 6.7±0.9 vs. 5.9±0.8 (p<0.01)<br>no differences in change in period 1: -                                                                                                                |

| Study name<br>registration<br>number<br>Design         | Setting<br>Place,<br>setting and<br>time   | Population<br>Inclusion / Exclusion criteria<br>Characteristics                                                                                                                                                                                                                                                                                                                                           | Intervention vs. Control<br>Description with duration                                                                                                   | Outcomes<br>Primary and secondary                                                                                                                                                                                                                                                                                                  | Results<br>Longest follow-up period with<br>intervention effects (IG vs. CG) with<br>SD, 95%-CI or p value                                                                                                                                                                                                                                                                                                                                                                    |
|--------------------------------------------------------|--------------------------------------------|-----------------------------------------------------------------------------------------------------------------------------------------------------------------------------------------------------------------------------------------------------------------------------------------------------------------------------------------------------------------------------------------------------------|---------------------------------------------------------------------------------------------------------------------------------------------------------|------------------------------------------------------------------------------------------------------------------------------------------------------------------------------------------------------------------------------------------------------------------------------------------------------------------------------------|-------------------------------------------------------------------------------------------------------------------------------------------------------------------------------------------------------------------------------------------------------------------------------------------------------------------------------------------------------------------------------------------------------------------------------------------------------------------------------|
| RCT                                                    | 10 / 2011                                  | diseases or therapies that<br>may affect body weight or<br>serum lipids                                                                                                                                                                                                                                                                                                                                   | HbA1c (%):7.21± 0.76<br>fasting glucose<br>(mg/dl): 154.5±22.5                                                                                          | <u>CG/IG (n=10)</u> : changed<br>after 12 wks and received<br>than honey<br><u>Duration</u> : 12 wks.                                                                                                                                                                                                                              | postprandial glucose,<br>HbA1c, serum lipid profile<br>5.83 ± 13.66 vs. 2.94±8.82 (p=0.105)<br><u>Fasting glucose (mg/dl)</u> :<br>• benefit with CG/IG: 142.7 ±26.6 vs.<br>116.7±19.4 (p<0.01)<br>benefit with IG/CG in period 1:-21.51 ±<br>10.84 vs. -0.08±5.14 (p=0.001)                                                                                                                                                                                                  |
| <b>Mohamad<br/>2009</b><br><br>RCT                     | Egypt,<br>urban                            | DM1, age 17 to 20 yrs<br><br>no acute metabolic<br>complications like diabetic<br>ketoacidosis, hypoglycaemia,<br>cardiovascular events, renal<br>or acute infections                                                                                                                                                                                                                                     | n=64<br>30 % female<br>age (yrs): 19.9±6.8<br>HbA1c (%): 9.52±2.08<br>fasting glucose<br>(mg/dl): 228.7±13.5<br>BMI (kg/m <sup>2</sup> ):<br>18.82±3.01 | <u>IG (n=27)</u> :<br>camel milk (500 ml)<br>+usual care<br>vs.<br><u>CG (n=27)</u> :<br>usual care for diabetes<br>(i.e. diet, exercise, insulin<br>mixtard)<br><u>Duration</u> : 16 weeks                                                                                                                                        | <u>Not specified</u> :<br>HbA1c, human C-peptide,<br>lipid profile, serum<br>insulin, anti-insulin<br>antibodies, creatinine<br>clearance, albumin<br>extraction in 24 h urine,<br>BMI, Diabetes QoL score,<br>fasting glucose<br>After 16 wks<br><u>HbA1c (%)</u> :<br>Benefit for IG: 7.16±1.84 vs. 9.59±2.05<br>fasting glucose.(mg/dl):<br>benefit for IG: 227.2±17.7 vs.<br>98.9±16.2                                                                                    |
| <b>van der Hoogt<br/>2017</b><br><br>cross-over<br>RCT | South Africa                               | DM1, age 4-17 yrs on insulin<br>pump therapy, HbA1c>9,6%<br>for ≥3months, BMI/age<br>z.score -1 to < 3, total daily<br>insulin use of >0,5 u/kg<br>no remission of diabetes,<br>smoking, coeliac disease,<br>cystic fibrosis, diseases or<br>medication that are<br>associated with delayed<br>gastric emptying or altered<br>digestation, glucocorticoids,<br>oral diabetic drugs, no acute<br>illnesses | n=32<br>41% female<br>age (yrs): 10.4±4.0<br>HbA1c (%): 8.2±0.8<br>duration of Diabetes<br>(yrs): 3.5 (1.5-8.0)                                         | <u>IG1 (n=22)</u> :<br>1 home-based_low fat and<br>protein meal<br>vs.<br><u>IG2 (n=22)</u> :<br>1 high fat and protein<br>meal with identical<br>carbohydrate content<br>two meals were<br>consumed at dinner time<br>(18:00) under parental<br>supervision at least 1 day<br>apart within one month<br><u>Duration</u> : 3months | <u>primary</u> : peak sensor<br>glucose value post-meal,<br>time to peak sensor<br>glucose, time of first and<br>largest correction bolus,<br>total correction insulin,<br>total meal insulin,<br>additional insulin<br>required ,area under the<br>sensor glucose response<br>curve (AUC) (≥ 8 mmol/L),<br>duration of elevated post-<br>prandial glucose<br>Change over 12 weeks<br><u>Occurance of hypoglycaemic events</u> :<br>7 (32 %) vs. 1 patients after IG1 vs. IG2 |
| <b>Medical device</b>                                  |                                            |                                                                                                                                                                                                                                                                                                                                                                                                           |                                                                                                                                                         |                                                                                                                                                                                                                                                                                                                                    |                                                                                                                                                                                                                                                                                                                                                                                                                                                                               |
| Elbarbary<br>2016<br><br>RCT                           | Egypt,<br>urban<br><br>06/2014-<br>07/2014 | DM1, adolescents and adults<br>who wished to fast the<br>month of Ramadan with<br>insulin pump for ≥6 months<br>and attending the whole                                                                                                                                                                                                                                                                   | n=73<br>68.3% female<br>age (yrs): 15.6±2.7<br>HbA1c (%): 7.65±0.9<br>BMI (kg/m <sup>2</sup> ):                                                         | Insulin pump therapy<br>during Ramadan fasting<br><br><u>IG (n=25)</u> :<br>sensor with low glucose                                                                                                                                                                                                                                | <u>Primary</u> : hypoglycaemia<br><u>Other</u> : glucose value,<br>number of 'full fasted<br>days', emergency hospital<br>visit for diabetes-related<br>After 1 months:<br><u>Glucose value (mg/dl)</u> :<br>152.5±17.3 vs. 141±33.8 (p=0.9)<br><u>Complications</u> :<br>Number of hypoglycaemic excursions:                                                                                                                                                                 |

| Study name registration number Design           | Setting Place, setting and time     | Population Inclusion / Exclusion criteria                                                                                                                                                               | Characteristics                                                                                                                                       | Intervention vs. Control Description with duration                                                                                                       | Outcomes Primary and secondary                                                                                                                          | Results Longest follow-up period with intervention effects (IG vs. CG) with SD, 95%-CI or p value                                                                                                                                                                 |
|-------------------------------------------------|-------------------------------------|---------------------------------------------------------------------------------------------------------------------------------------------------------------------------------------------------------|-------------------------------------------------------------------------------------------------------------------------------------------------------|----------------------------------------------------------------------------------------------------------------------------------------------------------|---------------------------------------------------------------------------------------------------------------------------------------------------------|-------------------------------------------------------------------------------------------------------------------------------------------------------------------------------------------------------------------------------------------------------------------|
|                                                 |                                     | education session 2 months before fasting and committed to follow-up the given instructions                                                                                                             | 24.56±3.5 duration of diabetes (yrs): 5.8±2.9 on pump therapy (yrs): 1.73±0.99                                                                        | suspension activation vs. <u>CG (n=35):</u> sensor without low glucose suspension activation <u>Duration:</u> 1 month                                    | problem                                                                                                                                                 | 3.68±1.62 vs. 6.7±2.1 (p=0.001)<br>Number of hyperglycaemic excursions: 17.0±4.0 vs. 23.0±7.6 (p=0.001)<br>No severe hypoglycaemic events, no episodes of diabetic ketoacidosis, no hyperglycaemic events associated with ketosis no deaths or device-related SAE |
| <b>Pharmacological Strategies</b>               |                                     |                                                                                                                                                                                                         |                                                                                                                                                       |                                                                                                                                                          |                                                                                                                                                         |                                                                                                                                                                                                                                                                   |
| <b>Elbarbary 2018</b><br>NCT0292825<br><br>RCT  | Egypt, urban                        | DM1, age: 9 - 18 yrs, ≥ 5 yrs disease duration, active diabetic nephropathy in the form of microalbuminuria, HbA1c ≤ 8.5 %                                                                              | n=90<br>52.3 % female<br>age (yrs): 12.85±3.1<br>HbA1c (%):7.85±1.95                                                                                  | <u>IG (n=45):</u><br>1 g/d carnosine vs. <u>CG (n=45):</u><br>control/placebo group                                                                      | <u>Primary:</u> change in tubular damage marker<br><u>Secondary:</u> urinary albumin excretion (UAE), oxidative stress markers<br><u>Safety:</u> any AE | After 12 wks:<br><u>HbA1c (%):</u><br>• Benefit for IG: 7.4 ±1.3 vs. 8.3±2.4<br>• change -9.88±7.12 vs. 3.89±2.28 (p=0.005)<br>No adverse reactions were reported                                                                                                 |
|                                                 |                                     | no infection, renal impairment due to other causes other than diabetes, other diabetic complications, hypersensitivity to carnosine                                                                     |                                                                                                                                                       | Patients in both groups received oral ACE-Is captopril 25 mg<br><u>Duration:</u> 12 wks                                                                  |                                                                                                                                                         |                                                                                                                                                                                                                                                                   |
| <b>Elbarbary 2020</b><br>NCT03594240<br><br>RCT | Egypt, urban<br><br>03/2017-03/2018 | DM1 on insulin therapy with > 5 yrs of disease duration, 12-18 yrs, active nephropathy, HbA1c< 8.5 %, no infections, renal impairment due to other causes than diabetes, other diabetic complications , | n=80<br>55% female<br>age (yrs): 15.4 ± 1.6<br>HbA1c (%):7.95±0.5<br>fasting glucose (mg/dl): 114.5±21.8<br>duration of diabetes (years): 8.65 ± 2.65 | both groups received oral angiotensin-converting-enzyme inhibitors (captopril)<br><br><u>IG (n=40)</u> oral vitamin B complex (B1,B6,B12) once daily vs. | <u>Primary:</u> Cystatin C diet, physical activity, and metformin dosage                                                                                | after 12 weeks<br><u>HbA1c (%):</u><br>Benefit for IG: 7.5±0.6 vs. 8.0±0.6<br><u>Fasting glucose (mg/dl):</u><br>107.7±14.1 vs. 116.4±17 (p=131)                                                                                                                  |

| Study name                                                                                                                                                                                                                                                                                                                                        | Setting                 | Population                                                                                                                                          | Intervention vs. Control                               | Outcomes              | Results                                                                                   |
|---------------------------------------------------------------------------------------------------------------------------------------------------------------------------------------------------------------------------------------------------------------------------------------------------------------------------------------------------|-------------------------|-----------------------------------------------------------------------------------------------------------------------------------------------------|--------------------------------------------------------|-----------------------|-------------------------------------------------------------------------------------------|
| registration number<br>Design                                                                                                                                                                                                                                                                                                                     | Place, setting and time | Inclusion / Exclusion criteria<br>Characteristics                                                                                                   | Description with duration                              | Primary and secondary | Longest follow-up period with intervention effects (IG vs. CG) with SD, 95%-CI or p value |
|                                                                                                                                                                                                                                                                                                                                                   |                         | elevated liver enzymes, hyper-or hypothyroidism, hypertension, neoplasm, taking any vitamins or food supplements within 1 months before study start | <u>CG (n=40): placebo</u><br><u>Duration: 12 weeks</u> |                       |                                                                                           |
| BMI: Body mass index; CG: Control group; CG/IG: Crossover from CG to IG; CI: Confidence interval; DM1: Type 1 diabetes; FPG: fasting plasma glucose; HbA1c: haemoglobin A1c; IG/CG: cross over from IG to CG; IG: intervention group; n: number of participants ;RCT: randomized controlled trial; SD: Standard-deviation; wks: weeks; yrs: years |                         |                                                                                                                                                     |                                                        |                       |                                                                                           |

**Supplementary Table 2:** Characteristics and results of studies on patients with DM1

RCTs mainly including patients with DM2

| Study name                                  | Setting                                 | Population                                                                           | Intervention vs. Control                                                                                                                                                           | Outcomes                                                                                                                                                                                                                                                      | Results                                                                                                                                                                                                                                                                                                                                               |                                                                                                                                                                                                                                                                                                                                                                                                                                                                                                                                                  |
|---------------------------------------------|-----------------------------------------|--------------------------------------------------------------------------------------|------------------------------------------------------------------------------------------------------------------------------------------------------------------------------------|---------------------------------------------------------------------------------------------------------------------------------------------------------------------------------------------------------------------------------------------------------------|-------------------------------------------------------------------------------------------------------------------------------------------------------------------------------------------------------------------------------------------------------------------------------------------------------------------------------------------------------|--------------------------------------------------------------------------------------------------------------------------------------------------------------------------------------------------------------------------------------------------------------------------------------------------------------------------------------------------------------------------------------------------------------------------------------------------------------------------------------------------------------------------------------------------|
| registration number Design                  | Place, setting and time                 | Inclusion / Exclusion criteria Characteristics                                       | Description with duration                                                                                                                                                          | Primary and secondary                                                                                                                                                                                                                                         | Longest follow-up period with intervention effects (IG vs. CG) with SD, 95%-CI or p value                                                                                                                                                                                                                                                             |                                                                                                                                                                                                                                                                                                                                                                                                                                                                                                                                                  |
| <b>Educational strategies</b>               |                                         |                                                                                      |                                                                                                                                                                                    |                                                                                                                                                                                                                                                               |                                                                                                                                                                                                                                                                                                                                                       |                                                                                                                                                                                                                                                                                                                                                                                                                                                                                                                                                  |
| <b>Abaza 2017</b><br>NCT02868320<br><br>RCT | Egypt, urban, tertiary care, 03-07/2015 | DM2, mobile phone, capable to read SMS or live with someone who could read           | n=73<br>56 % females<br>age (yrs): 51.5±9.2<br>majority had had diabetes for > 1 yr<br>hypertension: 41.1 %<br>on insulin: 19.2 %<br>DM complication: 80.8 %<br>HbA1c (%): 9.7±2.7 | Diabetes awareness program:<br>paper-based educations material plus<br><u>IG (n=34):</u> daily messages and weekly reminders addressing various diabetes care categories vs.<br><u>CG (n=39):</u> paper-based educations material<br><u>Duration:</u> 12 wks. | <u>Primary:</u> change in Hba1C<br><u>Secondary:</u><br>Random blood glucose levels, body weight, adherence of treatment and medication, diabetes self-efficacy and knowledge, rate of hospital/ER visits, frequency of measurements, regular exercise, patients confidence in healthcare provider and satisfaction, healthcare provider’s reputation | After 3 months:<br><u>HbA1c (%)</u> :<br>• No differences: 8.73 ±1.98 vs. 8.84±2.40, MD <sub>a</sub> : 0.290 (-0.402 to 0.983; p = 0.406)<br>• Benefit with IG: 47 vs. 15 % achieved the targeted 1% drop (p = 0.003)<br><u>Random blood glucose</u> (mg/dl):<br>• No difference: 181±65 vs. 201±87 (p=0.288)<br><u>Treatment adherence</u> (scores):<br>• Benefit with IG in SCI 3.42±0.48 vs. 2.52±0.49 (p<0.001) and Morisky: 3.76±0.55 vs. 2.74±1.07 (p<0.001)<br><u>Hospital /ER admission</u> (%):<br>No differences: 0 vs. 10.3 (p=0.118) |
| <b>Adibe 2013</b><br><br>RCT                | Nigeria, urban, tertiary care           | DM2, age≥ 18 yrs with oral hypoglycemic and / or insulin therapy<br><br>no pregnancy | n=220<br>58 % females<br>age (yrs): 52.6±7.9<br>duration of diabetes (yrs): 4.7±2.5,<br>60.5% with diabetes > 5 yrs<br>on insulin: 13.6 %<br>hypertension: 60.5 %                  | <u>IG (n=110):</u><br>structured self-care education and training program by pharmacists and nurses<br>vs.<br><u>CG (n=110):</u> usual / conventional care<br><u>Duration:</u> 12 months                                                                      | <u>Primary:</u> incremental cost-utility ratio, net monetary benefit<br><u>Other:</u> quality of life                                                                                                                                                                                                                                                 | After 12 months:<br><u>Quality of life</u> :<br>• Benefit with IG: 0.86 ± 0.12 vs. 0.64 ± 0.10 (p=0.0001) improved single attributes except “hearing” functioning of the patients<br><u>Costs:</u><br>• benefit of \$0.76±0.15 vs. \$0.64± 0.15 QALY/patient and year; MD: \$ 0.12 (0.07 to 0.16)<br>• incremental cost-utility ratio of \$571 per QALY                                                                                                                                                                                          |
| <b>Adjei 2015</b>                           | Ghana, urban                            | DM                                                                                   | n=200<br>64.5% female                                                                                                                                                              | <u>IG: (n=100):</u><br>electronical reminder for                                                                                                                                                                                                              | <u>Primary:</u> Compliance with appointment dates                                                                                                                                                                                                                                                                                                     | After 6 months:<br><u>Adherence to appointment schedules</u>                                                                                                                                                                                                                                                                                                                                                                                                                                                                                     |



| Study name<br>registration<br>number<br>Design | Setting<br>Place,<br>setting and<br>time                                                   | Population<br>Inclusion / Exclusion criteria<br>Characteristics                                                                                                                                                                                                                                                                                                                                                                                                                    | Intervention vs. Control<br>Description with duration                                                                                                                                                                                                                                                                                            | Outcomes<br>Primary and secondary                                                                                                                                                                                                                                                                                                                                                                                          | Results<br>Longest follow-up period with<br>intervention effects (IG vs. CG) with<br>SD, 95%-CI or p value                                                                                                                |                                                                                                                                                                                                                                                                                                                                                                                                                                                                                                                                                                                                 |
|------------------------------------------------|--------------------------------------------------------------------------------------------|------------------------------------------------------------------------------------------------------------------------------------------------------------------------------------------------------------------------------------------------------------------------------------------------------------------------------------------------------------------------------------------------------------------------------------------------------------------------------------|--------------------------------------------------------------------------------------------------------------------------------------------------------------------------------------------------------------------------------------------------------------------------------------------------------------------------------------------------|----------------------------------------------------------------------------------------------------------------------------------------------------------------------------------------------------------------------------------------------------------------------------------------------------------------------------------------------------------------------------------------------------------------------------|---------------------------------------------------------------------------------------------------------------------------------------------------------------------------------------------------------------------------|-------------------------------------------------------------------------------------------------------------------------------------------------------------------------------------------------------------------------------------------------------------------------------------------------------------------------------------------------------------------------------------------------------------------------------------------------------------------------------------------------------------------------------------------------------------------------------------------------|
| RCT                                            |                                                                                            | age (yrs):<br>< 50 yrs: 63 %<br>> 50 yrs: 37 %<br>fasting glucose<br>(mmol/l): 10.4±3.8                                                                                                                                                                                                                                                                                                                                                                                            | clinical appointments of<br>patients + alert system<br>for abnormal laboratory<br>results<br>vs.<br><u>CG: (n=100):</u><br>usual diabetes care,<br>paper based method<br><u>Duration: 6 months</u>                                                                                                                                               | <u>Other:</u> metabolic risk<br>factors, BMI                                                                                                                                                                                                                                                                                                                                                                               | (%)<br>Benefit for IG: 97.8 vs. 89.4 (p=0.010)<br><u>Fasting glucose (mmol/l):</u><br>Benefit for IG: 8.04±2.14 vs. 8.85±2.63;<br>MD 0.4 (-0.59 to -0.36, p=0.022)                                                        |                                                                                                                                                                                                                                                                                                                                                                                                                                                                                                                                                                                                 |
| <b>Amendezo<br/>2017</b><br>NCT02032108<br>RCT | Rwanda,<br>urban,<br>tertiary care                                                         | DM2>3mths, age>21yrs<br>no pregnancy or severe co-<br>morbid illnesses.                                                                                                                                                                                                                                                                                                                                                                                                            | n=251<br>69.3% females<br>age (yrs): 50.9 ±10.9<br>BMI (kg/m <sup>2</sup> ): 27.9<br>(27.0-28.5)<br>duration of diabetes :<br><10 yrs: 73.7%, >10<br>yrs: 16.3%<br>HbA1c (%): 8.98±8.6-<br>9.3                                                                                                                                                   | <u>IG (n=115):</u><br>standard care plus<br>monthly lifestyle<br>education sessions of 45<br>min duration<br>vs.<br><u>CG (n=108):</u> standard<br>care<br><u>Duration: 12 months</u>                                                                                                                                                                                                                                      | <u>Primary:</u> difference in<br>HbA1c<br><u>Secondary:</u> fasting<br>glucose, systolic and<br>diastolic blood pressure,<br>BMI                                                                                          | after 12 months:<br><u>HbA1c (%):</u><br>Benefit for IG with median reductions<br>of -1.70 (-2.09 to -1.31) vs. -0.52 (-0.95<br>to -0.10); MD: -0.72 ( -1.14 to -0.30;<br>p< 0.001)<br><u>Fasting glucose (mmol/L):</u><br>6.9 (6.45 to 7.36) vs. 9.02 (8.18 to<br>9.87) (p<0.001)                                                                                                                                                                                                                                                                                                              |
| <b>Chraibi 2017</b><br>NCT01589653<br>RCT      | Egypt,<br>Indonesia,<br>Morocco,<br>Saudi<br>Arabia,<br>Vietnam<br><br>05/2012-<br>07/2015 | DM2 with diagnosis ≥ 12<br>months, age≥18 , currently<br>being treated with NPH<br>Insulin for ≥ 3 months +<br>metformin (1000-1500 mg)<br>for ≥ 2 months, HbA1c ≥ 7.0%<br>≤10%, BMI ≤ 40.0 kg/m <sup>2</sup><br><br>no treatment with<br>thiazolidinedione, glucagon-<br>like peptide-1 receptor<br>agonists, pramlintide within<br>the last 3 months , >1 IU/kg<br>NPH insulin daily; previous<br>use of premixed or bolus<br>insulin, > 1 severe<br>hypoglycemic episode during | n=155<br>74.9 % female<br>age (yrs): 54.5 ±10.0<br>BMI (kg/m <sup>2</sup> ):<br>29.05±4.9<br>HbA1c (%): 8.6 ±0.83<br>fasting glucose<br>(mmol/L): 8.97<br>duration of diabetes<br>(yrs): 9.5±5.8<br>African patients:<br>• Egypt: 25.75 %<br>• Morocco: 27.7 %<br>Diabetic nephropathy<br>/ neuropathy /<br>retinopathy (%): 3.2 /<br>16.1 / 3.2 | <u>IG (n=76):</u><br>patient driven titration of<br>Biphasic insulin aspart 30<br>twice daily, 3 clinic visits<br>vs.<br><u>CG (n=79):</u><br>physician driven titration<br>twice daily, 6 clinic visits<br><br>Titration in both arms<br>according to the titration<br>protocol bases on self-<br>measured plasma glucose<br>values, measured twice<br>daily on 3 preceding days,<br>telephone contact<br>whenever deemed | <u>Primary:</u> change in HbA1c<br><u>Secondary:</u> proportion of<br>patients achieving the<br>ADA target of HbA1c<br><7.0 % and the HbA1c<br>target of <6.5 % after<br>20 weeks, FPG changes,<br>hypoglycemic episodes, | Change over 5 months:<br><u>HbA1c (%):</u><br>• Decreased in both arms with non-<br>inferiority between groups: MD -0.23<br>(-0.54 to 0.08)<br>• More patients reached HbA1c <7.0%:<br>40.8 vs. 29.1 %, RR: 1.79 (0.87 to 3.65)<br>and <6.5%: 25 vs. 19 %; RR: 1.52 (0.67<br>to 3.46)<br>• More patients reached target HbA1c<br>levels without severe or minor<br>hypoglycemic episodes: <7.0%: 38 vs.<br>27.8 %, RR: 1.52 (0.61 to 3.79), <6.5%:<br>18 vs. 14.8 %; RR 1.13 (0.36 to 3.52)<br><u>FPG (mmol/l):</u><br>• Decreased in both arms with no<br>difference between groups: 0.95±0.28 |

| Study name<br>registration<br>number<br>Design                   | Setting<br>Place,<br>setting and<br>time                           | Population<br>Inclusion / Exclusion criteria                                                                                                                              | Population<br>Characteristics                                                                                                                                       | Intervention vs. Control<br>Description with duration                                                                                                                                                                                                                                                              | Outcomes<br>Primary and secondary                                                                                                                                                                                                  | Results<br>Longest follow-up period with<br>intervention effects (IG vs. CG) with<br>SD, 95%-CI or p value                                                                                                                                                                                                                                                                                                                       |
|------------------------------------------------------------------|--------------------------------------------------------------------|---------------------------------------------------------------------------------------------------------------------------------------------------------------------------|---------------------------------------------------------------------------------------------------------------------------------------------------------------------|--------------------------------------------------------------------------------------------------------------------------------------------------------------------------------------------------------------------------------------------------------------------------------------------------------------------|------------------------------------------------------------------------------------------------------------------------------------------------------------------------------------------------------------------------------------|----------------------------------------------------------------------------------------------------------------------------------------------------------------------------------------------------------------------------------------------------------------------------------------------------------------------------------------------------------------------------------------------------------------------------------|
|                                                                  |                                                                    | the previous 12 month,<br>impaired kidney or hepatic<br>function, proliferative<br>retinopathy or maculopathy<br>requiring treatment                                      | Macroangiopathy (%):<br>5.2                                                                                                                                         | necessary<br><u>Duration</u> : 20 weeks                                                                                                                                                                                                                                                                            |                                                                                                                                                                                                                                    | vs. 0.67±0.28; MD: -0.28 (-1.07 to 0.52)<br><u>Costs</u><br>• Less frequent clinic visits to healthcare<br>professionals in IG: 4.8±0.65 vs.<br>7.5±1.42 visits/patient<br><u>Complications</u> :<br>• hypoglycemic episodes: no difference:<br>608.4 vs. 789.2 / 100 patient-years of<br>exposure; RR: 0.74 (0.44; 1.23)<br>treatment-emergent AEs: no<br>difference: 324.2 vs. 302.2 events /<br>100 patient-years of exposure |
| <b>Debussche<br/>2018</b><br>NCT01485913<br><br>RCT              | Mali,<br>urban,<br>secondary<br>care,<br><br>07/2011-<br>02/2013   | DM2, age 30-80 yrs,<br>HbA1c ≥ 8 %,<br><br>no DM1, severe diabetes<br>complications or concomitant<br>illnesses that threatened<br>their functional or vital<br>prognosis | n=151<br>76.2% female<br>age (yrs): 52.5±9.8<br>BMI (kg/m <sup>2</sup> ):28.6±5.4                                                                                   | <u>IG (n=76)</u> :<br>peer-led structured<br>patient education<br>received culturally<br>tailored structured<br>patient education (3<br>courses of 4 sessions)<br>delivered in the<br>community by five<br>trained peer educators<br>vs.<br><u>CG (n=75)</u> : conventional<br>care alone<br><u>Duration</u> :1 yr | <u>Primary</u> : HbA1c<br><u>Secondary</u> :<br>anthropometric<br>indicators (weight and<br>BMI, waist<br>circumference), SBP, DBP,<br>anti-diabetic and anti-<br>hypertensive treatment,<br>knowledge score, dietary<br>practices | Change to 12 months<br><u>HbA1c (%)</u> :<br>• Benefit in IG: MD 1.05 % (-1.54;-<br>0.56) vs. -0.15 % (-0.56; 0.26) (p =<br>0.006)                                                                                                                                                                                                                                                                                               |
| <b>Essien<br/>2017</b><br><br>PACTR201302<br>00047835<br><br>RCT | Nigeria,<br>urban,<br>tertiary<br>care,<br><br>09/2013-<br>05/2014 | DM1 or DM2, age: ≥ 18 yrs,<br>HbA1c> 8.5 %, able to engage<br>in moderate exercise,<br><br>no eye disease that would<br>limit the ability to read                         | n=118<br>60.2 % female<br>age (yrs): 52.7±10.5<br>BMI (kg/m <sup>2</sup> ):<br>28.9±7.5<br>HbA1c (%):10.7±1.6<br>type of diabetes<br>• DM1: 14.4 %<br>• DM2: 85.6 % | <u>IG: (n=59)</u> :<br>intensive and systematic<br>disease self-management<br>education programme<br>(invitation and<br>encouragement by<br>clinical staff to attend 12<br>structured teaching<br>sessions)<br>vs.                                                                                                 | <u>Primary</u> : HbA1c                                                                                                                                                                                                             | After 6 months:<br><u>HbA1c (%)</u> :<br>8.4 (8 to 8.9) vs. 10.2 (9.8 to 10.7);<br>MD <sub>a</sub> : -1.8 (-2.4 to -1.2); (p < 0.0001)                                                                                                                                                                                                                                                                                           |

| Study name<br>registration<br>number<br>Design               | Setting<br>Place,<br>setting and<br>time                                            | Population<br>Inclusion / Exclusion criteria                                                                                                                                                    | Characteristics                                                                                                                                                                                                                                     | Intervention vs. Control<br>Description with duration                                                                                                                                                                                                                                                                                                                                                                  | Outcomes<br>Primary and secondary                                                                                                                                             | Results<br>Longest follow-up period with<br>intervention effects (IG vs. CG) with<br>SD, 95%-CI or p value                                                                                                                                                                                                                                           |
|--------------------------------------------------------------|-------------------------------------------------------------------------------------|-------------------------------------------------------------------------------------------------------------------------------------------------------------------------------------------------|-----------------------------------------------------------------------------------------------------------------------------------------------------------------------------------------------------------------------------------------------------|------------------------------------------------------------------------------------------------------------------------------------------------------------------------------------------------------------------------------------------------------------------------------------------------------------------------------------------------------------------------------------------------------------------------|-------------------------------------------------------------------------------------------------------------------------------------------------------------------------------|------------------------------------------------------------------------------------------------------------------------------------------------------------------------------------------------------------------------------------------------------------------------------------------------------------------------------------------------------|
|                                                              |                                                                                     |                                                                                                                                                                                                 |                                                                                                                                                                                                                                                     | <u>CG (n=59):</u> conventional<br>disease-self-management<br>education<br><u>Duration:</u> 6 months                                                                                                                                                                                                                                                                                                                    |                                                                                                                                                                               |                                                                                                                                                                                                                                                                                                                                                      |
| <b>Fairall 2016</b><br>ISRCTN20283<br>604<br><br>Cluster-RCT | South Africa<br>,<br>urban/rural,<br>primary<br>care,<br><br>03/2011 –<br>11 / 2011 | age ≥ 18 yrs , clinics providing<br>service for NCD Patients with<br>DM, hypertension, chronic<br>respiratory disease or<br>depression, with self-<br>reported hypoglycaemic (in<br>case of DM) | n= 38 public sector<br>primary care clinics,<br>4393 patients,<br>n=1842 with DM<br>73 % female<br>age (yrs):median,<br>IQR): 52 (42-61) vs. 52<br>(44-62)<br>BMI (kg/m <sup>2</sup> ): 30±8<br>HbA1c (%):9 (4-17), in<br>HbA1c in DM≥ 7 %:<br>77 % | <u>IG (n=2166, 851 with<br/>DM):</u><br>Nurses were trained to<br>use a primary care<br>programme to support<br>and expand nurses`role in<br>NCD care and contains a<br>clinical management tool<br>with enhances<br>prescribing provisions<br>vs.<br><u>CG (n=2227, 991 with<br/>DM):</u><br>Nurses continued to use<br>the Lung Health and<br>HIV/AIDS approach with<br>usual training<br><u>Duration:</u> 14 months | <u>Primary (for DM):</u><br>treatment intensification<br>(addition or increase in<br>dose of metformin and/or<br>sulphonylurea, insulin,<br>ACE-inhibitor, aspirin,<br>statin | over 14 months<br><u>HbA1c (%):</u><br>• <7 %: 41 vs. 38 %; RR 1.08 (0.77 to<br>1.52; p=0.638)<br>• 7-10 %: 69 vs. 55 %; RR 1.30 (1.16 to<br>1.47; p<0.001)<br>• >10 %: 71 vs. 73 %; RR 0.97 (0.81 to<br>1.16; p=0.703)<br><u>Treatment intensification rates* (%):</u><br>• 57% vs. 50%, RRa: 1.11 (0.99 to 1.26)<br>(p=0.083) for patients with DM |
| <b>Hailu 2018</b><br>NCT03185689<br><br>RCT                  | Ethiopia,<br>urban,<br><br>02/2016-<br>10/2017                                      | DM2, age > 18 yrs<br><br>no DM1 or GDM, pregnant<br>women, severe cognitive or<br>physical impairment, and<br>terminally ill people                                                             | n=220<br>33 % female<br>age (yrs): 54.5±10<br>BMI (kg/m <sup>2</sup> ):25±4<br>HbA1c (%):10.5±4                                                                                                                                                     | <u>IG (n= 116):</u><br>Nurse-led disease-<br>management education:<br>6 sessions, supported<br>with illustrative pictures<br>handbooks and fliers,<br>customized to local<br>conditions by trained<br>nurses<br>vs.<br><u>CG (n=104):</u><br>usual follow-up care<br><u>Duration:</u> 9 months                                                                                                                         | <u>Primary:</u><br>patients with target<br>HbA1c ( ≤ 7 %)<br><u>Secondary:</u> systolic and<br>diastolic blood pressure,<br>fasting glucose, BMI,<br>waist circumference      | Change over 9 months:<br><u>HbA1c (%):</u><br>• No difference: 45 % vs. 50 % with<br>target values (p=0.21), MD: 2.88% (-<br>3.85 to -1.92) vs. 2.57% (-3.47 to -<br>1.67)<br><u>fasting glucose (mg/dl):</u><br>• Benefit with IG: 36 % vs.25 % with<br>target values, MD: -27 ( -45 to -9;<br>p=0.003)                                             |

| Study name                                             | Setting                                                    | Population                                                                                                                                                                    | Intervention vs. Control                                                                                                                                                                        | Outcomes                                                                                                                                                                                                                                                                                                                                                           | Results                                                                                                                                                                                                                                                                                                                               |                                                                                                                                                                                                                                                                                                                                                                                                                                                                                                                                                                                                            |
|--------------------------------------------------------|------------------------------------------------------------|-------------------------------------------------------------------------------------------------------------------------------------------------------------------------------|-------------------------------------------------------------------------------------------------------------------------------------------------------------------------------------------------|--------------------------------------------------------------------------------------------------------------------------------------------------------------------------------------------------------------------------------------------------------------------------------------------------------------------------------------------------------------------|---------------------------------------------------------------------------------------------------------------------------------------------------------------------------------------------------------------------------------------------------------------------------------------------------------------------------------------|------------------------------------------------------------------------------------------------------------------------------------------------------------------------------------------------------------------------------------------------------------------------------------------------------------------------------------------------------------------------------------------------------------------------------------------------------------------------------------------------------------------------------------------------------------------------------------------------------------|
| registration number                                    | Place, setting and time                                    | Inclusion / Exclusion criteria                                                                                                                                                | Description with duration                                                                                                                                                                       | Primary and secondary                                                                                                                                                                                                                                                                                                                                              | Longest follow-up period with intervention effects (IG vs. CG) with SD, 95%-CI or p value                                                                                                                                                                                                                                             |                                                                                                                                                                                                                                                                                                                                                                                                                                                                                                                                                                                                            |
| Design                                                 |                                                            | Characteristics                                                                                                                                                               |                                                                                                                                                                                                 |                                                                                                                                                                                                                                                                                                                                                                    |                                                                                                                                                                                                                                                                                                                                       |                                                                                                                                                                                                                                                                                                                                                                                                                                                                                                                                                                                                            |
| <b>Labhardt 2011</b><br>NCT00744458<br><br>Cluster-RCT | Cameroon rural, primary care,<br><br>08/2008-02/2010       | newly detected adult patients with DM2 and /or hypertension in the catchment area of nurse-led health centres, staffed, equipped and trained to care for DM2 and hypertension | n=33 facilities, 221 patients<br>64% females<br>age (yrs): 59.8±12.7<br>diabetes: 15.4 %<br>Overweight (BMI 25-29.9 kg/m <sup>2</sup> ): 28.5 %<br>Obesity (BMI> 30 kg/m <sup>2</sup> ): 20.4 % | <u>IG 1 (11 centres, n=55): incentive group</u><br>free treatment for 1 months for patients who regularly attended follow up visits<br>vs.<br><u>IG 2 (11 centres, n=77): letter group:</u> reminder letters in case of a missed follow-up visit<br>vs.<br><u>CG (11 centres, n=89):</u> no additional intervention<br><u>Duration:</u> 12 months                  | <u>Primary:</u><br>Patient retention at 1 yr (≥ 12 follow-up visits within 12 months)<br><u>Secondary:</u><br>Adherence with timely attendance of follow-up visit schemes and changes in blood pressure and blood glucose levels.                                                                                                     | After 12 months:<br><u>Retention rates (%):</u><br>• Benefit for IG1 and IG2 vs.CG: 60 vs. 65 vs. 29 %; MD 34 (21 to 46) with no differences between IG1 and IG2; MD - 5 (-22 to 12)<br><u>Loss to follow-up:</u><br>• Benefit for IG1 and IG2: IG1 vs. CG: HR 0.44 (0.27 to 0.72; p< 0.001)<br>• IG2 vs. CG: HR 0.38 (0.24 to 0.61; p<0.001)<br><u>Adherence (%):</u><br>• Benefit for IG1 and IG2: 38 vs. 35 vs. 10; MD 26 (14 to 42), IG1 vs CG: MD 28(13 to 37); IG2 vs. CG: MD 25 (13 to 37)<br>• no difference between IG1 and IG2: MD 3 (-14 to 20)<br><u>FPG:</u><br>No differences between groups |
| <b>Mash 2014</b><br><br>Cluster RCT                    | South Africa, urban, primary care,<br><br>12/2010 -12/2012 | DM2 with any therapy attending community health centres in the working class areas of Cape Town Metropole<br><br>no DM1, dementia, mental illness or acute illness            | n=34 public sector community health centres, 1570 patients<br>73.8% females<br>age (yrs): 56.1±11.6<br>HbA1c (%): 9.1±2.3                                                                       | <u>IG (17 health centres, n=710):</u><br>4 monthly sessions lasting 60 min with group education about diabetes topics (understanding diabetes and medication, living a healthy lifestyle and preventing complications), delivered by a health promotion officer vs.<br><u>CG (17 health centres, n=860):</u><br>usual care: ad hoc advice during consultations and | <u>Primary:</u><br>improvement of diabetes self-care activities (5 % weight loss, and a 1 % reduction in HbA1c level)<br><u>Secondary:</u><br>improved diabetes specific self-efficacy, locus of control, mean blood pressure, mean weight loss, mean waist circumference, mean HbA1c, mean total cholesterol levels, quality of life | After 12 months:<br><u>HbA1c (%):</u><br>No differences: 8.4±2.0 vs. 8.8±2.2; MD <sub>a</sub> : 0.01 (-0.27 to 0.28; p=0.967)<br><u>Adherence (self-care activities):</u><br>No differences in scores of physical activity, use of diet plan or medication, foot care or frequency of smoking<br><u>Quality of life:</u><br>No differences in physical functioning, role or social functioning, mental or general health and pain<br><u>Costs:</u><br>Incremental cost effectiveness ratio: 1862 Dollar/ QALY gained                                                                                       |

| Study name                                                 | Setting                                                       | Population                                                                                                                                                                                                                                                                                                                                                                                                                                                                                                                                               |                                                                                                                                                                                                                                                                                                                          | Intervention vs. Control                                                                                                                                                                                                                                                                                                                                                          | Outcomes                                                                                                                                                                                                                                   | Results                                                                                                                                                       |
|------------------------------------------------------------|---------------------------------------------------------------|----------------------------------------------------------------------------------------------------------------------------------------------------------------------------------------------------------------------------------------------------------------------------------------------------------------------------------------------------------------------------------------------------------------------------------------------------------------------------------------------------------------------------------------------------------|--------------------------------------------------------------------------------------------------------------------------------------------------------------------------------------------------------------------------------------------------------------------------------------------------------------------------|-----------------------------------------------------------------------------------------------------------------------------------------------------------------------------------------------------------------------------------------------------------------------------------------------------------------------------------------------------------------------------------|--------------------------------------------------------------------------------------------------------------------------------------------------------------------------------------------------------------------------------------------|---------------------------------------------------------------------------------------------------------------------------------------------------------------|
| registration number<br>Design                              | Place, setting and time                                       | Inclusion / Exclusion criteria                                                                                                                                                                                                                                                                                                                                                                                                                                                                                                                           | Characteristics                                                                                                                                                                                                                                                                                                          | Description with duration                                                                                                                                                                                                                                                                                                                                                         | Primary and secondary                                                                                                                                                                                                                      | Longest follow-up period with intervention effects (IG vs. CG) with SD, 95%-CI or p value                                                                     |
|                                                            |                                                               |                                                                                                                                                                                                                                                                                                                                                                                                                                                                                                                                                          |                                                                                                                                                                                                                                                                                                                          | occasional educational talks in waiting room<br><u>Duration</u> : 12 months                                                                                                                                                                                                                                                                                                       |                                                                                                                                                                                                                                            |                                                                                                                                                               |
| <b>Muchiri 2015</b><br><br>RCT                             | South Africa, rural, primary care,<br><br>04/2010-11/2011     | DM2, age 40-70 yrs attending community health centres, HbA1c $\geq$ 8 %, blood sugar levels $\geq$ 10 mmol/l, duration of diabetes $\geq$ 1 yr<br><br>no insulin therapy, pregnant women, full time employed                                                                                                                                                                                                                                                                                                                                             | n=82<br>86.6 % female<br>age (yrs): 59 $\pm$ 7.4<br>BMI(kg/m <sup>2</sup> ): 30.9 $\pm$ 6.9<br>HbA1c (%): 11.1 $\pm$ 2.0<br>duration of diabetes (yrs): 6                                                                                                                                                                | <u>IG (n=41)</u> :<br>education materials+ 8 weekly group educational sessions about diabetes and nutrition, follow-up sessions+vegetable gardening<br><u>CG (n=41)</u> :<br>education materials<br><u>Duration</u> : 12 months                                                                                                                                                   | <u>Primary</u> : HbA1c<br><u>Secondary</u> :<br>Other clinical outcomes (BMI, blood pressure and blood lipids), HbA1c, dietary behaviours                                                                                                  | over 12 months<br><u>HbA1c (%)</u> :<br>no difference: 9.8 $\pm$ 1.92 vs. 10.4 $\pm$ 1.92; MD -0.63 (-0.26 to 1.50; p=0.16)                                   |
| <b>Owolabi 2019</b><br>PACTR201810<br>599931422<br><br>RCT | South Africa urban/rural, primary care<br><br>07/2018-04/2019 | DM, age $\geq$ 18 yrs, DM diagnosed at least in the last 6 months, currently receiving treatment at the selected clinics, on stable medication for $\geq$ 3 months prior to recruitment, uncontrolled glycaemic control, in possession of a mobile phone, able to retrieve and read SMSs and willing to receive SMSs<br><br>health or mental conditions that could interfere with the study, pregnant or planning to get pregnant within the next 6 months, debilitated or handicapped in such a way that obtaining anthropometric measurements could be | n=216<br>84.3 % females<br>age (yrs): 60.6 $\pm$ 11.6<br>DM2 (%): 94<br>Treated with oral pills (%): 75.5<br>Duration of DM (yrs): 9.1 $\pm$ 7.4<br>Duration of DM treatment (yrs): 8.8 $\pm$ 7.2<br>Hypertension (%): 83.0<br>Random blood glucose (mmol/L): 14.34 $\pm$ 3.9<br>BMI(kg/m <sup>2</sup> ): 32.2 $\pm$ 6.2 | <u>IG (n=108)</u> :<br>daily SMS text-messaging SMS at an agreed time of the day, according to their needs, care plan and goal with motivational and support messages, advice on lifestyle behaviours (e.g. diets, physical activity, smoking cessation, medication and appointment reminders)<br>vs.<br><u>CG (n=108)</u> :<br>usual diabetes care<br><u>Duration</u> : 6 months | <u>Primary</u> : Morning random blood sugar<br><u>Secondary</u> :<br>co-morbid outcomes (hypertension and obesity), obtained through blood pressure measurement, anthropometric measurements (body weight, BMI) acceptability, feasibility | Over 6 months:<br><u>Blood glucose levels</u> (mmol/L):<br>-1.58 $\pm$ 5.29 vs. -1.95 $\pm$ 4.69; MD 0.51(-0.8 to 1.82), MD <sub>a</sub> 0.26 (-0.81 to 1.32) |

| Study name<br>registration<br>number<br>Design | Setting<br>Place,<br>setting and<br>time                        | Population<br>Inclusion / Exclusion criteria                                                                                                                                                                                                                                                                                                                                     | Characteristics                                                                                                                                                                                                                                   | Intervention vs. Control<br>Description with duration                                                                                                                                                                                                                                                                                                                           | Outcomes<br>Primary and secondary                                                                                                      | Results<br>Longest follow-up period with<br>intervention effects (IG vs. CG) with<br>SD, 95%-CI or p value                                                                          |
|------------------------------------------------|-----------------------------------------------------------------|----------------------------------------------------------------------------------------------------------------------------------------------------------------------------------------------------------------------------------------------------------------------------------------------------------------------------------------------------------------------------------|---------------------------------------------------------------------------------------------------------------------------------------------------------------------------------------------------------------------------------------------------|---------------------------------------------------------------------------------------------------------------------------------------------------------------------------------------------------------------------------------------------------------------------------------------------------------------------------------------------------------------------------------|----------------------------------------------------------------------------------------------------------------------------------------|-------------------------------------------------------------------------------------------------------------------------------------------------------------------------------------|
|                                                |                                                                 | challenging                                                                                                                                                                                                                                                                                                                                                                      |                                                                                                                                                                                                                                                   |                                                                                                                                                                                                                                                                                                                                                                                 |                                                                                                                                        |                                                                                                                                                                                     |
| <b>Sodipo 2017</b><br>RCT                      | Nigeria,<br>primary<br>care,<br><br>03/2013-<br>11/2013         | DM2 ≥ 18 yrs. on antidiabetic<br>medication<br><br>no patients with<br>emergencies, chronic<br>complications such as<br>nephropathy, neuropathy<br>etc., those already using<br>glucometer                                                                                                                                                                                       | n=120<br>gender: 50% female<br>age (yrs): 59±10.95<br>HbA1c (%): 8.7±2.45<br>fasting glucose<br>(mg/dl): 152±60.9<br>duration of diabetes<br>(yrs): 50%> 3yrs                                                                                     | <u>IG (n=60):</u><br>Self-monitoring of blood<br>glucose before and after<br>meals 3 days a week for<br>12 weeks<br><u>CG (n=60); non SMBG</u><br><u>Duration: 12 wks</u>                                                                                                                                                                                                       | HbA1C, fasting glucose                                                                                                                 | after 3 months:<br><u>HbA1c (%):</u><br>No difference: 7.2±2.0 vs. 7.7±2.0 (p=<br>0.174)<br>fasting glucose (mg/dl):<br>No difference: 123.2±35.1 vs.<br>137.6±50.1 (p=0.087)       |
| <b>Steyn 2013</b><br><br>Cluster-RCT           | South<br>Africa,<br>urban,<br>primary<br>care,<br><br>1999-2000 | public sector primary health<br>care clinics (CHC) with ≥ 25<br>diabetes and ≥ hypertension<br>patients<br>age ≥15yrs, a documented<br>attende at the particular<br>CHC with ≥ 4 visits during the<br>previous year for<br>hypertension or diabetes who<br>received treatment for these<br>conditions at each visit<br><br>no patients being unable to<br>answer a questionnaire | 18 community health<br>centres<br>n=1096, of them<br>n= 456 with DM<br>age (yrs): 58.3 ± 11<br>gender:74 % females<br>BMI (kg/m <sup>2</sup> ):<br>30.7 ± 6.2<br>Type of Diabetes:<br>• DM1: 5.8%<br>• DM2: 91.35%<br>uncertain DM type:<br>2.85% | <u>IG (9 clinics, n=229):</u><br>introduction of structured<br>clinical record with<br>guidelines prompts after<br>training of doctors in<br>their use and suggestions<br>to incorporate them in<br>regular patient records,<br>contact over 1 year<br>vs.<br><u>CG (9 clinics, n= 227):</u><br>usual care with passively<br>disseminated guidelines<br><u>Duration: 1 year</u> | <u>primary:</u> HbA1C in the<br>diabetes group<br><u>secondary:</u><br>uncontrolled glycaemia<br>(HbA1c ≥7%) in the<br>diabetes group. | After 3 months:<br><u>HbA1c (%):</u><br>IG: 8.8% vs. 8.8%; MDa -1.0 (-1.1 to -<br>0.9)<br><u>HbA1c ≥7% (%):</u><br>no relevant difference: 64.1 vs. 62.6;<br>MD 0.90 (0.53 to 1.53) |
| <b>Takenga 2014</b><br><br>RCT                 | Congo,<br>urban                                                 | DM2, 35-75 yrs                                                                                                                                                                                                                                                                                                                                                                   | n=40<br>20 % females<br>age (yrs): 53.3 ± 10.1<br>HbA1c (%): 8.63                                                                                                                                                                                 | <u>IG (n=20):</u><br>self-management of<br>diabetes with Mobil DIAB<br>(telemedical approach)<br><br><u>vs.</u><br><u>CG (n=20):</u><br>conventional therapy<br>without telemedical<br>system                                                                                                                                                                                   | <u>primary:</u> HbA1c                                                                                                                  | after 2 months:<br><u>HbA1c (%):</u><br>Benefit for IG: 6.73±1.59 vs. vs.<br>8.6±1.35 (MD -1.87 (-2.91 to -0.83)                                                                    |

| Study name<br>registration<br>number<br>Design            | Setting<br>Place,<br>setting and<br>time                          | Population<br>Inclusion / Exclusion criteria                                                                                                                                                                                                                                                        | Characteristics                                                                                                                                                                                                                                                                                                                  | Intervention vs. Control<br>Description with duration                                                                                                                                                                               | Outcomes<br>Primary and secondary                                                                                                                                                                               | Results<br>Longest follow-up period with<br>intervention effects (IG vs. CG) with<br>SD, 95%-CI or p value                                                                                                                                                                                                                                                                                                                                                                                           |
|-----------------------------------------------------------|-------------------------------------------------------------------|-----------------------------------------------------------------------------------------------------------------------------------------------------------------------------------------------------------------------------------------------------------------------------------------------------|----------------------------------------------------------------------------------------------------------------------------------------------------------------------------------------------------------------------------------------------------------------------------------------------------------------------------------|-------------------------------------------------------------------------------------------------------------------------------------------------------------------------------------------------------------------------------------|-----------------------------------------------------------------------------------------------------------------------------------------------------------------------------------------------------------------|------------------------------------------------------------------------------------------------------------------------------------------------------------------------------------------------------------------------------------------------------------------------------------------------------------------------------------------------------------------------------------------------------------------------------------------------------------------------------------------------------|
| <u>Duration:</u> 60 days                                  |                                                                   |                                                                                                                                                                                                                                                                                                     |                                                                                                                                                                                                                                                                                                                                  |                                                                                                                                                                                                                                     |                                                                                                                                                                                                                 |                                                                                                                                                                                                                                                                                                                                                                                                                                                                                                      |
| <b>Tawfik 2016</b><br><br>RCT                             | Egypt,<br>urban,<br>primary<br>care,<br><br>05/2015-<br>09/2015   | DM2 for ≥ 1 yr, 40-79 yrs<br>attending an outpatient clinic<br><br>no patients who were already<br>using a similar medication<br>chart, severe or terminal<br>health conditions, or patients<br>with behavioural health issue<br>that could make it difficult to<br>understand the<br>communication | n=255<br>53.7 % females<br>age (yrs): 55.7±8.35<br>HbA1c (%): 8.14±1.3<br>duration of diabetes<br>(yrs): 8.3±1.3                                                                                                                                                                                                                 | <u>IG (n=127):</u><br>comprehensive<br>cardiovascular risk<br>communication<br>vs.<br><u>CG (n=128):</u><br>standard usual care<br><u>Duration:</u> 3 months                                                                        | <u>Primary:</u> HbA1c<br><u>Secondary:</u><br>Cardiovascular risk<br>perception, diabetes self-<br>care, cardiovascular risk<br>scores                                                                          | After 3 months:<br><u>HbA1c (%):</u><br>Benefit for IG: 7.5±0.8 vs. 8.12±0.9;<br>MD -0.62 (-0.85 to -0.39)<br><u>controlled HbA1c (%):</u><br>32.7 vs. 29.9                                                                                                                                                                                                                                                                                                                                          |
| <b>Thuita 2020</b><br>PACTR201910<br>518676391<br><br>RCT | Kenya<br>Secondary<br>care<br>recruitment<br>08/2016 -<br>10/2016 | DM2, 20-79 yrs with regular<br>attendance of an outpatient<br>clinic<br><br>Pregnancy, complications<br>such as renal failure,<br>congestive heart failure, or<br>stroke                                                                                                                            | n=153<br>59.5 % females<br>age (yrs). 56±11.6<br>Family history of DM<br>(%): 46.6<br>Poor glycaemic<br>control (%) with<br>HbA1c>7%: 77.8<br>DM for 1-5 yrs (%):<br>58.2 %<br>Years with DM:<br>6.7±6.9<br>Oral medications (%):<br>82.4<br>BMP (kg/m2): 27±4.6<br>HbA1c (%): 8.49±1.9<br>fasting glucose<br>(mmol/l): 11.0±3.3 | <u>IG2 (n=51):</u><br>nutrition education<br>programme for 2 hrs<br>/week with peer-to-peer<br>support<br>vs.<br><u>IG1 (n=51):</u><br>Education programme<br>vs.<br><u>CG (n=51):</u><br>Standard care<br><u>Duration:</u> 8 weeks | <u>Primary:</u> metabolic<br>syndrome prevalence<br>(MetS)<br><u>Other:</u> anthropometry<br>and clinical data, blood<br>pressure, blood glucose<br>and lipid profile, physical<br>activity levels, food intake | After 6 months:<br><u>Metabolic syndrome prevalence:</u> lower<br>with IG2:<br>Harmonized criteria: 52.1 vs. 69.4 vs.<br>91.3 (p<0.001)<br>WHO: 58.3 vs. 77.6 vs. 89.1 (p=0.003)<br><u>HbA1c (%):</u><br>Mean change: no differences -<br>2.04±2.70 vs. 1.48±2.73 vs. -0.73±2.71<br>High HbA1c: no differences: 47.9 vs.<br>29.0 vs. 34.8 %<br><u>fasting glucose (mmol/l):</u><br>no differences: -2.59±0.66 vs. -<br>2.95±0.64 vs. -1.55±0.68<br>high fasting glucose: 79.2 vs. 83.7 vs.<br>91.3 % |

| Study name                                         | Setting                                                   | Population                                                                                                                                                                                                                                                                                                                                                                                                                                                                                                                                                                                             | Intervention vs. Control                                                                                                                                                                                                                                                                                                                               | Outcomes                                                                                                                                                                                                                                                           | Results                                                                                                                                                                                                                                                                                                                                                                                                                                                                                                       |
|----------------------------------------------------|-----------------------------------------------------------|--------------------------------------------------------------------------------------------------------------------------------------------------------------------------------------------------------------------------------------------------------------------------------------------------------------------------------------------------------------------------------------------------------------------------------------------------------------------------------------------------------------------------------------------------------------------------------------------------------|--------------------------------------------------------------------------------------------------------------------------------------------------------------------------------------------------------------------------------------------------------------------------------------------------------------------------------------------------------|--------------------------------------------------------------------------------------------------------------------------------------------------------------------------------------------------------------------------------------------------------------------|---------------------------------------------------------------------------------------------------------------------------------------------------------------------------------------------------------------------------------------------------------------------------------------------------------------------------------------------------------------------------------------------------------------------------------------------------------------------------------------------------------------|
| registration number<br>Design                      | Place, setting and time                                   | Inclusion / Exclusion criteria<br>Characteristics                                                                                                                                                                                                                                                                                                                                                                                                                                                                                                                                                      | Description with duration                                                                                                                                                                                                                                                                                                                              | Primary and secondary                                                                                                                                                                                                                                              | Longest follow-up period with intervention effects (IG vs. CG) with SD, 95%-CI or p value                                                                                                                                                                                                                                                                                                                                                                                                                     |
| <b>Webb 2015</b><br>NCT01275040<br><br>Cluster RCT | South Africa, urban, primary care,<br><br>06/2010-03/2011 | primary health_care clinics, patients with clinical diagnosis of DM2 or DM1_for ≥5yrs, age ≥ 18 yrs<br><br>n= 12 primary health care clinics<br>n= 599<br>gender:68.5 % female<br>age (yrs): 57.8±10.5<br>HbA1c (%): 8.73±2.3<br>HbA1c ≥ 7 %: 73 %<br>BMI (kg/m <sup>2</sup> ): 30.8±6.7<br>Typ of diabetes:<br><ul style="list-style-type: none"> <li>DM1: 3.7 %</li> <li>DM2: 70.3 %</li> <li>unknown: 26 %</li> </ul> duration of Diabetes:<br><ul style="list-style-type: none"> <li>&lt; 5 yrs: 47.3 %</li> <li>5-10 yrs: 22.0 %</li> <li>&gt; 10 yrs: 20.2 %</li> <li>unknown: 10.5 %</li> </ul> | <u>IG (n=328):</u><br>mobile screening team visits primary care clinic and provides education and active screening for diabetic complications (foot, kidney, cardiac and renal complications) vs.<br><u>CG(n=273):</u><br>no mobile screening team, routine care with similar education for patients. and health care workers<br><u>Duration:</u> 1 yr | <u>Primary:</u> HbA1c, detected neuropathy, nephropathy and retinopathy, HbA1c categories<br><u>Secondary:</u> detected complications, referred patients for complication assessment or care, blood pressure and lipid control, costs, LDL cholesterol, creatinine | after 12 months<br><u>HbA1c (%):</u><br>no difference: 8.54±2.11 vs. 8,76 ±2.2, MD-0.22 (-0.64, 0.20)<br><u>screening rate for complications:</u> in IG 60% increase of screening in all complication indicator groups, in both groups testing of HbA1c and renal complications (serum-creatinine) increased , but no significant difference , screening for eye complications, only increased significantly in IG<br>no significant difference in the proportion of actions taken between IG and CG (p=0.83) |
| <b>Strategies to enhance physical activity</b>     |                                                           |                                                                                                                                                                                                                                                                                                                                                                                                                                                                                                                                                                                                        |                                                                                                                                                                                                                                                                                                                                                        |                                                                                                                                                                                                                                                                    |                                                                                                                                                                                                                                                                                                                                                                                                                                                                                                               |
| <b>Asuako 2017</b><br><br>RCT                      | Ghana, urban, tertiary care,<br><br>08/2015-03/2016       | DM, age: 20-68 yrs, ambulant patients, without diabetes complications with < 150 minutes /wk of moderate physical activity<br>no SBP > 140 or DBP> 90 mmHg, bilateral or unilateral lower or upper limbs amputation, use of insulin pump<br><br>n=12<br>83% female<br>age (yrs): 83% were 46-55 yrs.<br>BMI (kg/m <sup>2</sup> ):25.4±4.5<br>fasting glucose (mmol/l):9.33 ± 5.7<br>type of diabetes:<br>DM1: 17 %<br>DM2: 83 %<br>duration of diabetes (yrs):<br><ul style="list-style-type: none"> <li>1-5 yrs: 25 %</li> <li>6-10 yrs: 50 %</li> <li>10 yrs: 25 %</li> </ul>                        | <u>IG (n=7):</u><br>walking aerobic exercise sessions without treadmills (3/week) vs.<br><u>CG (n=5):</u><br>only activity of daily living<br><br>Both continued regular medical/clinical routines<br><u>Duration:</u> 8 weeks                                                                                                                         | FPG, Lipid profile, body weight, BMI                                                                                                                                                                                                                               | Change over 2 months:<br><u>FPG (mmol/l):</u><br>Benefit for IG: 6.27 ± 0.91 vs. 8.00 ± 0.96; MD 1.73 (-1.88 to -1.59; p<0.001)                                                                                                                                                                                                                                                                                                                                                                               |



| Study name<br>registration<br>number<br>Design | Setting<br>Place,<br>setting and<br>time             | Population<br>Inclusion / Exclusion criteria<br>Characteristics                                                                                                                                                                                                                    | Intervention vs. Control<br>Description with duration                                                                                                                                                     | Outcomes<br>Primary and secondary                                                                                                                                                                                                                                  | Results<br>Longest follow-up period with<br>intervention effects (IG vs. CG) with<br>SD, 95%-CI or p value                                                                                                                                                                                                                                                                                                              |
|------------------------------------------------|------------------------------------------------------|------------------------------------------------------------------------------------------------------------------------------------------------------------------------------------------------------------------------------------------------------------------------------------|-----------------------------------------------------------------------------------------------------------------------------------------------------------------------------------------------------------|--------------------------------------------------------------------------------------------------------------------------------------------------------------------------------------------------------------------------------------------------------------------|-------------------------------------------------------------------------------------------------------------------------------------------------------------------------------------------------------------------------------------------------------------------------------------------------------------------------------------------------------------------------------------------------------------------------|
| <b>Fayehun 2018</b>                            | Nigeria,<br>urban<br>06/2014-<br>11/2014             | DM2, age 18-64 yrs,<br>Diagnosed $\geq$ 12 months, non-<br>insulin dependent, on dietary<br>control $\pm$ hypoglycemic<br>agents, able to walk without<br>limitations<br><br>no pregnant women,<br>smokers, prescription of<br>medications that might<br>impair ability to walk    | n= 46<br>63 % female<br>age (yrs): 54 $\pm$ 7.7 (33-<br>64)<br>BMI (kg/m <sup>2</sup> ):<br>22.4 $\pm$ 3.3<br>HbA1c (%): 6.6 (5.3-<br>9.0)<br>duration of diabetes<br>(yrs): <7 yrs: 70 %,<br>>7 yrs 30 % | <u>IG (n=23):</u><br>Goal to accumulate<br>10000 steps per day<br>vs.<br><u>CG (n=23):</u><br>normal activity habits<br><u>Duration:</u> 10 weeks                                                                                                                  | <u>Primary:</u> HbA1c<br><u>Secondary:</u> step count<br><br>Change over 2.5 months:<br><u>HbA1c (%):</u><br>Benefit for IG: 6.26 (6.19 to 6.33) vs.<br>6.82 (6.69 to 6.95); MD <sub>a</sub> : -0.74 (-1.32<br>to -0.02; p=0.015)                                                                                                                                                                                       |
| <b>Maharaj 2016</b><br><br>RCT                 | Nigeria,<br>rural<br><br>07/2013-<br>06/2014         | DM2, non- insulin dependent,<br>blood glucose levels 6 -<br>13 mmol/l<br><br>no cardiac, abdominal or<br>spinal surgery $\leq$ 6 months,<br>history of fractures of lower<br>limbs, spine, weakness,<br>deformities, loss of sensation<br>in the feet, retinopathy,<br>nephropathy | n=90<br>52 % females<br>age (yrs): 39.4 $\pm$ 8.6<br>(30-58)<br>BMI (kg/m <sup>2</sup> ): 27.7 $\pm$ 5.8<br>HbA1c (%): 8.79 $\pm$ 2.11<br>duration of diabetes<br>(yrs): 2.5 $\pm$ 2.1                    | <u>IG (n=45):</u><br>rebound exercise 3<br>times/week for 20-<br>30 min, moderate<br>intensity of 40-60 % of HR<br>maximum<br>vs.<br><u>CG (n=45):</u><br>watched videos and read<br>health magazines<br><u>Duration:</u> 9 weeks                                  | <u>Primary:</u><br>HbA1c , FPG, BMI<br><u>Other:</u><br>Heart and respiratory<br>rates, blood pressure,<br>oxygen saturation<br><br>After 9 weeks<br><u>HbA1c (%):</u><br>Benefit for IG: 7.12 $\pm$ 1.19 vs. 8.36 $\pm$ 1.25;<br>MD <sub>a</sub> : 0.904 (0.832 to 0.984; p=0.017)<br><u>FPG (mmol/l):</u><br>Benefit for IG: 6.92 $\pm$ 1.21 vs. 8.73 $\pm$ 1.23;<br>MD <sub>a</sub> : 0.787 (0.7345- 0.841; p=0.002) |
| <b>van Rooijen<br/>2004</b><br><br>RCT         | South<br>Africa,<br>urban<br><br>03/2002-<br>11/2002 | black women with DM2, age<br>40-65yrs, duration of DM $\geq$ 12<br>months<br><u>no</u> chest pain on effort,<br>possible previous myocardial<br>infarction and intermittent<br>claudication, cerebro-<br>vascular incidents, arthritis,<br>retinopathy                             | n=158<br>gender:100 % females<br>age (yrs): 54-55<br>HbA1c (%): 9.35                                                                                                                                      | <u>IG (n=80):</u><br>education+ incremental<br>daily home exercise, use<br>of daily physical activity<br>records+6 fortnightly<br>supervised aerobic<br>exercise classes<br>vs.<br><u>CG(n=77):</u><br>education+ relaxation<br>exercise<br><u>Duration:</u> 12wks | <u>Primary:</u> HbA1c, BMI<br><u>Secondary:</u> walking<br>distance (6 min walk)<br><br>Change over 3 months:<br><u>HbA1c (%):</u><br>no difference: 8.99 $\pm$ 2.59 vs. 8.26 $\pm$ 1.97                                                                                                                                                                                                                                |
| <b>Yan 2014</b>                                | Mozambiqu<br>e,                                      | DM2, male, age 40-70 yrs,<br>diagnosis for $\geq$ 12 months                                                                                                                                                                                                                        | n=41<br>100% male                                                                                                                                                                                         | <u>IG (n=31):</u><br>low or vigorous intensity                                                                                                                                                                                                                     | plasma glucose, HbA1c<br><br>Change over 3 months:<br><u>HbA1c (%):</u>                                                                                                                                                                                                                                                                                                                                                 |

| Study name                        | Setting                 | Population                                                                                                                                                                                                                                                                                                                              | Intervention vs. Control                                                                                                | Outcomes                                                                                                                                                                                                                              | Results                                                                                                                                                                                                                                                                             |
|-----------------------------------|-------------------------|-----------------------------------------------------------------------------------------------------------------------------------------------------------------------------------------------------------------------------------------------------------------------------------------------------------------------------------------|-------------------------------------------------------------------------------------------------------------------------|---------------------------------------------------------------------------------------------------------------------------------------------------------------------------------------------------------------------------------------|-------------------------------------------------------------------------------------------------------------------------------------------------------------------------------------------------------------------------------------------------------------------------------------|
| registration number               | Place, setting and time | Inclusion / Exclusion criteria                                                                                                                                                                                                                                                                                                          | Description with duration                                                                                               | Primary and secondary                                                                                                                                                                                                                 | Longest follow-up period with intervention effects (IG vs. CG) with SD, 95%-CI or p value                                                                                                                                                                                           |
| RCT                               | urban                   | no known diseases other than DM2 and hypertension, no diagnosed cardiovascular diseases                                                                                                                                                                                                                                                 | age(yrs): 54±2.5<br>HbA1c: 8.6±0.7<br>plasma glucose (mmol/l): 9.65±1.2<br>BMI ( kg/m <sup>2</sup> ): 27.1 ± 1.0        | exercise 3-5 times/week vs.<br><u>CG(n=10):</u><br>walked 1 hour per day as part of their daily lifestyle<br><u>Duration:12 wks</u>                                                                                                   | reduction in both groups with no differences between groups: 7.7±0.4 vs. 7.7±0.8<br><u>Plasma glucose (mmol/l):</u><br>9.6 ± 0.7 vs. 11.1 ± 1.3                                                                                                                                     |
| <b>Pharmacological strategies</b> |                         |                                                                                                                                                                                                                                                                                                                                         |                                                                                                                         |                                                                                                                                                                                                                                       |                                                                                                                                                                                                                                                                                     |
| <b>Distiller 2014</b>             | South Africa            | DM2 for ≥ 1 year with total insulin requirement of >200 U/d for ≥ 3 months, BMI > 30 kg/m <sup>2</sup> , HbA1c> 7,5 %, on long-term metformin therapy (1.7–2.5 g/d)                                                                                                                                                                     | n=28<br>50% female<br>age (yrs): 51.7 (36-71)<br>HbA1c (%): 8.95 (7.6-11.3)<br>BMI (kg/m <sup>2</sup> ): 40.8 (31.2-47) | <u>IG (n=14):</u><br>regular Insulin (500 U/ml) + metformin + exenatide (5 µg orally twice a day for 1 month and titrated to 10 µg)<br>vs.<br><u>CG (n=14):</u><br>regular Insulin (500 U/ml) +metformin<br><u>Duration: 6 months</u> | <u>Primary:</u> HbA1c<br><u>Secondary:</u> Body weight, insulin dose, hypoglycemia                                                                                                                                                                                                  |
| RCT                               |                         | no pregnant or with childbearing potential, endocrinopathy, chronic inflammatory or systematic autoimmune disorder, CVD, active carcinoma, chronic illness, renal dysfunction, gastroparesis, no corticosteroids, DPP-4 inhibitors, exenatide, liraglutide, no anticipated change in other concomitant medication or insulin resistance |                                                                                                                         |                                                                                                                                                                                                                                       | Change to 6 months: <u>HbA1c (%):</u><br>Significant improvement in both groups<br>8.7→7.7(p=0.002) vs. 9.2→7.5 (p=0.0001)<br>With no difference between groups (MD: 0.28; p=0.80)<br><u>Complications:</u><br>Mild hypoglycaemia: 5 vs. 2 persons with 20 vs. 5 events (p ≤ 0.001) |
| <b>EI-Haggar 2015</b>             | Egypt, urban            | DM2, age: 45-55 yrs, obese (BMI≥30 kg/m <sup>2</sup> ), with duration 5-10 yrs, treated with glimepiride alone                                                                                                                                                                                                                          | n=48<br>79 % female<br>age (yrs): 50.1±4.6<br>HbA1c (%): 7.83±0.87<br>fasting glucose (mg/dl): 193±50                   | <u>IG1 (n=16):</u><br>glimepiride (3 mg/d) + 2 (1 mg twice/d)<br>vs.<br><u>IG2 (n=16):</u><br>glimepiride (3 mg/d) +                                                                                                                  | <u>not specified:</u><br>glycemic markers, metabolic markers, adiponectin, interleukin-6, leukotriene B4, mast cell tryptase, lipid panel,                                                                                                                                          |
| RCT                               | 01/2013-04/2014         | no Inflammatory disease,                                                                                                                                                                                                                                                                                                                |                                                                                                                         |                                                                                                                                                                                                                                       | Changes over 12 weeks: <u>HbA1c (%):</u><br>• Highest benefit for IG1: 7.1±0.86 vs. 8.2±0.82 vs. 8.7±0.93 (p< 0.05)<br><u>fasting glucose (mg/dl):</u><br>• Highest benefit for IG1: 199±38 vs.                                                                                     |

| Study name<br>registration<br>number<br>Design | Setting<br>Place,<br>setting and<br>time                                  | Population<br>Inclusion / Exclusion criteria                                                                                                                                                                                                                                                                                                                                                                                                                         | Characteristics                                                                                                                                     | Intervention vs. Control<br>Description with duration                                                                                                                                                                                                                | Outcomes<br>Primary and secondary                                                                                | Results<br>Longest follow-up period with<br>intervention effects (IG vs. CG) with<br>SD, 95%-CI or p value                                                                                                                                                                                                                                                                                                   |
|------------------------------------------------|---------------------------------------------------------------------------|----------------------------------------------------------------------------------------------------------------------------------------------------------------------------------------------------------------------------------------------------------------------------------------------------------------------------------------------------------------------------------------------------------------------------------------------------------------------|-----------------------------------------------------------------------------------------------------------------------------------------------------|----------------------------------------------------------------------------------------------------------------------------------------------------------------------------------------------------------------------------------------------------------------------|------------------------------------------------------------------------------------------------------------------|--------------------------------------------------------------------------------------------------------------------------------------------------------------------------------------------------------------------------------------------------------------------------------------------------------------------------------------------------------------------------------------------------------------|
|                                                |                                                                           | severe hepatic or renal<br>disease, epilepsy<br>pregnant/lactating females                                                                                                                                                                                                                                                                                                                                                                                           | BMI (kg/m <sup>2</sup> ):<br>37.6±4.6<br>duration of diabetes<br>(yrs): 7.7 ±2.6                                                                    | ketotifen (1 mg once/d)<br>vs.<br><u>CG (n=16):</u><br>gliimepiride (3 mg/d)<br>alone<br><u>Duration: 12 weeks</u>                                                                                                                                                   | BMI                                                                                                              | 207.7± 47.6 (p< 0.05)                                                                                                                                                                                                                                                                                                                                                                                        |
| <b>Malek 2015</b><br><br>RCT                   | Egypt,<br>Algeria,<br>Tunisia,<br>South Africa<br><br>03/2010-<br>05/2012 | DM2, age ≥ 18 yrs, currently<br>treated with suboptimal dose<br>of oral anti-diabetic drugs;<br>HbA1c 7-11 % (under<br>metformin-monotherapy)<br>and ≤ 10 % (under<br>combination therapy),<br>BMI≤40 kg/m <sup>2</sup><br><br>no allergies or<br>contraindications to the<br>product, pregnant or<br>breastfeeding, impaired<br>hepatic or renal function,<br>cardiovascular history,<br>uncontrolled hypertension,<br>proliferative retinopathy,<br>macular oedema | n=403<br>age (yrs): 52.8±9.6<br>59.8 % female<br>HbA1c (%): 8.65<br>BMI (kg/m <sup>2</sup> ):<br>29.7±4.5<br>duration of diabetes<br>(yrs): 7.5±5.1 | Stepwise individual<br>insulin intensification of<br><u>IG (n=200):</u><br>basal-bolus insulin<br>analogues (insulin<br>detemir +Insulin aspart)<br>vs.<br><u>CG (n=203):</u><br>thrice daily biphasic<br>insulin aspart depending<br>on HbA1c-values over<br>50 wks | <u>Primary:</u><br>HbA1c<br><u>Secondary:</u><br>patients achieving HbA1c<br>< 7.0 %, prandial plasma<br>glucose | Change over 50 weeks:<br><u>HbA1c (%):</u><br>Non-inferiority: 7.4 vs. 7.3; MD 0.1 (-<br>0.1 to 0.3 (full-analysis set), MD 0.2 (-<br>0.1 to 0.4 (per protocol)<br>40.3% and 44.9% achieved<br>HbA1c<7.0%<br><u>Hypoglycaemia (events/patient year):</u><br>9.4 vs. 9.8<br><u>Serious adverse events:</u><br>6.5 vs. 3.4 % with 1 treatment-related<br>SAE in CG<br><u>Adverse events:</u><br>58.5 vs. 63.1% |
| <b>Strategies on food supplementation</b>      |                                                                           |                                                                                                                                                                                                                                                                                                                                                                                                                                                                      |                                                                                                                                                     |                                                                                                                                                                                                                                                                      |                                                                                                                  |                                                                                                                                                                                                                                                                                                                                                                                                              |

1  
2  
3  
4  
5  
6  
7  
8  
9  
10  
11  
12  
13  
14  
15  
16  
17  
18  
19  
20  
21  
22  
23  
24  
25  
26  
27  
28  
29  
30  
31  
32  
33  
34  
35  
36  
37  
38  
39  
40  
41  
42  
43  
44  
45  
46

| Study name<br>registration<br>number<br>Design | Setting<br>Place,<br>setting and<br>time                     | Population<br>Inclusion / Exclusion criteria                                                                                                                                                                                                                                                                                                                                                                                                                                                                                                   | Characteristics                                                                                                                                                                                                                     | Intervention vs. Control<br>Description with duration                                                                                                                                                                                                                                                                                                                                                              | Outcomes<br>Primary and secondary                                                                                                                                                                                                                                  | Results<br>Longest follow-up period with<br>intervention effects (IG vs. CG) with<br>SD, 95%-CI or p value                                                                                                                                                                                                                                                                                                                            |
|------------------------------------------------|--------------------------------------------------------------|------------------------------------------------------------------------------------------------------------------------------------------------------------------------------------------------------------------------------------------------------------------------------------------------------------------------------------------------------------------------------------------------------------------------------------------------------------------------------------------------------------------------------------------------|-------------------------------------------------------------------------------------------------------------------------------------------------------------------------------------------------------------------------------------|--------------------------------------------------------------------------------------------------------------------------------------------------------------------------------------------------------------------------------------------------------------------------------------------------------------------------------------------------------------------------------------------------------------------|--------------------------------------------------------------------------------------------------------------------------------------------------------------------------------------------------------------------------------------------------------------------|---------------------------------------------------------------------------------------------------------------------------------------------------------------------------------------------------------------------------------------------------------------------------------------------------------------------------------------------------------------------------------------------------------------------------------------|
| <b>Ali 2019</b><br><br>RCT                     | Egypt<br>Urban,<br>tertiary care<br><br>09/2017 –<br>04/2018 | DM2, oral antidiabetic agents<br>with no change of type and<br>dosage of antidiabetic agents<br>in the past 3 months, ≥ 30<br>years<br><br>insulin-dependence,<br>pregnancy, lactation, use of<br>Ca, multivitamins, Vitamin D<br>supplements, use of drugs<br>that affect Vitamin D status,<br>dietary Ca intake > 1500<br>mg/d, hypo- or<br>hyperthyroidism,<br>smoking, use of antiepileptic<br>drugs, sarcoidosis,<br>tuberculosis, potentially<br>terminal illness, inflammatory<br>bowel disease, liver or kidney<br>disease, malignancy | n=85<br>age (yrs): 54.6 ±2.8<br>68 % females<br>BMI (kg/m <sup>2</sup> ): 28.6±3.3<br>Diabetic duration<br>(yrs): 4.4±2.1<br>fasting glucose<br>(mg/dL): 168±54.4<br>fasting serum insulin<br>(μU/mL): 18.1±8.3<br>HbA1c(%):8.8±1.8 | oral antidiabetic agents<br>as usual +<br><u>IG 1 (n=22):</u><br>continuous oral Vitamin<br>D3 (4000 IU/ d)<br>vs.<br><u>IG 2 (n=22):</u><br>intermittent regimen of<br>Vitamin D3 (50 000 IU/<br>week)<br>vs.<br><u>IG 3 (n=21):</u><br>single IM injection of<br>300 000 IU of Vitamin D3<br>at the start of the study<br>vs.<br><u>CG (n=20):</u> only oral<br>antidiabetic agents<br><u>Duration:</u> 3 months | Not specified: serum<br>creatinine, blood urea<br>nitrogen, total and<br>ionized Ca, serum<br>phosphorus, fasting<br>glucose, fasting<br>serum insulin, 25(OH)D3<br>levels, HbA1c                                                                                  | After 3 months:<br><u>fasting glucose</u> (mg/dL): higher<br>decrease in IG1 and IG2: -20.9±18.1 vs.<br>-23.0±37.9 vs. -3.5±6.9 vs. 1.0±5.6<br>(p<0.001)<br><u>fasting serum insulin</u> (μU/mL): higher<br>decrease in IG1 and IG2: -4.44±5.2 vs.-<br>5.88±4.6 vs. -1.55±9.4 vs. 0.10±1.0<br>(p< 0.001)<br><u>HbA1c (%)</u> :higher decrease in IG1 and<br>IG2: -0.81±0.77 vs. -0.82±0.87 vs. -<br>0.34±1.47 vs. 0.05±0.08 (p<0.001) |
| <b>Anderson 2001</b><br><br>RCT                | Tunesia,<br>urban                                            | DM2 ≥ 5y, age< 65 yrs,<br>fasting glucose > 8 mmol/l<br>and HbA1C > 7.5 %<br><br>no pregnant or lactating<br>women, receiving trace<br>element supplements in past<br>3 months, with gastric or<br>diuretic treatment, acute<br>renal, acute infection or<br>recent surgery                                                                                                                                                                                                                                                                    | n=110<br>age (yrs): 53.2 ±16.8<br>BMI (kg/m <sup>2</sup> ):<br>29.1±1.0<br>HbA1c (%):8.82±3.25<br>fasting glucose<br>(mmol/l): 11.45±0.<br>83<br>duration of diabetes<br>(months): 73.6±66                                          | <u>IG 1 (n=27):</u><br>Zinc (30 mg/d)<br>vs.<br><u>IG 2 (n=27):</u><br>Chromium (400 μg/d)<br>vs.<br><u>IG 3 (n=27):</u><br>Zinc (30 mg /d) +<br>Chromium (400 μg /d)<br>vs.<br><u>CG (n=29):</u><br>placebo<br><u>Duration:</u> 6 months                                                                                                                                                                          | Not specified:<br>HbA1C, fasting glucose<br>plasma concentrations of<br>zinc, copper, selenium,<br>urinary chromium and<br>zinc, Plasma<br>thiobarbituric acid<br>reactive substances,<br>copper-zinc-superoxid<br>dismutase, selenium -<br>glutathione peroxidase | Change over 6 months:<br><u>HbA1c (%)</u> :<br>7.7±1.6 vs. 7.4±1.4 vs. 8.1±1.6<br>CG: not reported                                                                                                                                                                                                                                                                                                                                    |
| <b>Anyanwu 2016</b>                            | Nigeria,<br>urban                                            | DM2, age 35-65 yrs on oral<br>antidiabetics with vitamin D                                                                                                                                                                                                                                                                                                                                                                                                                                                                                     | n=42<br>57.6 % female                                                                                                                                                                                                               | <u>IG (n=21):</u><br>Vitamin D3 supplements                                                                                                                                                                                                                                                                                                                                                                        | <u>Primary:</u> HbA1c<br><u>Other:</u> fasting glucose,                                                                                                                                                                                                            | Changes over 12 wks:<br><u>HbA1c (%)</u> :                                                                                                                                                                                                                                                                                                                                                                                            |

| Study name<br>registration<br>number<br>Design | Setting<br>Place,<br>setting and<br>time                   | Population<br>Inclusion / Exclusion criteria                                                                                                                                                                                                                                                                                                                                                                                                                                                                                                                                                                                    | Characteristics                                                                                                                                                                             | Intervention vs. Control<br>Description with duration                                                                                                                                          | Outcomes<br>Primary and secondary                                                            | Results<br>Longest follow-up period with<br>intervention effects (IG vs. CG) with<br>SD, 95%-CI or p value                                                                                                                                                                                                                                                                                                  |
|------------------------------------------------|------------------------------------------------------------|---------------------------------------------------------------------------------------------------------------------------------------------------------------------------------------------------------------------------------------------------------------------------------------------------------------------------------------------------------------------------------------------------------------------------------------------------------------------------------------------------------------------------------------------------------------------------------------------------------------------------------|---------------------------------------------------------------------------------------------------------------------------------------------------------------------------------------------|------------------------------------------------------------------------------------------------------------------------------------------------------------------------------------------------|----------------------------------------------------------------------------------------------|-------------------------------------------------------------------------------------------------------------------------------------------------------------------------------------------------------------------------------------------------------------------------------------------------------------------------------------------------------------------------------------------------------------|
| RCT                                            |                                                            | deficiency and poor glycemic control (HbA1c > 6.5 %)                                                                                                                                                                                                                                                                                                                                                                                                                                                                                                                                                                            | age (yrs): 51.8±2.05<br>HbA1c (%): 7.88<br>fasting glucose (mg/dl): 152.8±56.5                                                                                                              | (3000 IU/d)<br>vs.<br><u>CG(n=21):</u><br>placebo<br><u>Duration:</u> 12 weeks                                                                                                                 | levels of serum Vitamin D, calcium, albumin, phosphate, creatinine, and alanine transaminase | <ul style="list-style-type: none"> <li>MD (IG vs. CG): -0.66 (-0.161 to 0.29) vs 0.38 (-0.08 to 0.84);</li> <li>MD: -1.04 (-2.09 to 0.01)</li> <li>change from poor glycemic control (HbA1c&gt;6.5 %) to normal HbA1c (%): benefit for IF: 33.3 vs. -9.1 (p&lt;0.05)</li> </ul> <u>fasting glucose (mg/dl):</u><br>137.2±33.6 vs. 154±67.5<br><u>patient adherence</u> (tablet counts, %):<br>62.2 vs. 59.9 |
| <b>El Gayar 2019</b><br><br>RCT                | Egypt,<br>urban,<br>outpatients<br><br>01/2017-<br>01/2018 | DM2 for < 6 months, 30-60 yrs, HbA1c level < 9%, BMI≥30 kg/m <sup>2</sup><br><br>no insulin therapy, any injectable or oral antidiabetic medication other than metformin, no smoking, consumption of alcohol or narcotic drugs, no acute illnesses at the baseline or during the study, no pregnancy or lactation, autoimmune disorder, cardiac or renal diseases, thyroid, chronic inflammatory diseases, peptic ulcer, regular consumption of ginger or other herbal drugs, hypersensitivity to ginger, consumption of lipid lowering drugs or oral contraceptive pills or any supplements 2 months before starting the study | n=80<br>49 % female<br>age (yrs): 46.2 ± 9.1<br>HbA1c (%): 8.04±0.5<br>fasting glucose (mg/dl): 176.9±18.3<br>Fasting serum insulin (mIU/L): 19.3±3.3<br>BMI (kg/m <sup>2</sup> ): 32.3±1.4 | diet, physical activity, and metformin<br><u>IG (n=40):</u><br>ginger powder supplementation (600 mg/capsule, 3 capsules/d)<br>vs.<br><u>CG (n=40):</u><br>Placebo<br><u>Duration:</u> 8 weeks | <u>Not specified:</u> glycemic status, lipid profile and beta-cell function                  | After 8 wks:<br><u>HbA1c (%)</u> :<br>decrease in both groups to 6.94±0.38 vs. 7.26±0.45<br><u>Fasting serum insulin</u> (mIU/L):<br>decrease in both groups to 12.86±2.59 vs. 13.21±2.08<br>fasting glucose (mg/dl):<br>decrease in both groups to 120.88±9.06 vs. 151.70±13.23                                                                                                                            |

| Study name<br>registration<br>number<br>Design | Setting<br>Place,<br>setting and<br>time                     | Population<br>Inclusion / Exclusion criteria                                                                                                                                                                                                                                                                                                                                                                                                                                                                                                                       | Characteristics                                                                                                                                         | Intervention vs. Control<br>Description with duration                                                                                                                                                                    | Outcomes<br>Primary and secondary                                                                                                                                                                                                                   | Results<br>Longest follow-up period with<br>intervention effects (IG vs. CG) with<br>SD, 95%-CI or p value                                                                                                          |
|------------------------------------------------|--------------------------------------------------------------|--------------------------------------------------------------------------------------------------------------------------------------------------------------------------------------------------------------------------------------------------------------------------------------------------------------------------------------------------------------------------------------------------------------------------------------------------------------------------------------------------------------------------------------------------------------------|---------------------------------------------------------------------------------------------------------------------------------------------------------|--------------------------------------------------------------------------------------------------------------------------------------------------------------------------------------------------------------------------|-----------------------------------------------------------------------------------------------------------------------------------------------------------------------------------------------------------------------------------------------------|---------------------------------------------------------------------------------------------------------------------------------------------------------------------------------------------------------------------|
| <b>EI-Sheikh<br/>2019</b><br><br>RCT           | Egypt,<br>urban                                              | DM2 on glimepiride alone,<br>age ≥30 yrs<br><br>no insulin sensitizers,<br>steroids, NSAIDs, warfarin or<br>lipid lowering medications,<br>thyroid hormones, valproic<br>acid or suffered from: acute<br>or chronic inflammatory<br>diseases, end-stage renal<br>disease undergoing dialysis,<br>hypothyroidism epilepsy,<br>pregnant and breast-feeding<br>women                                                                                                                                                                                                  | n= 72<br>67 % female<br>age (yrs): 50.6±8.7<br>HbA1c (%):9.76±1<br><br>fasting glucose<br>(mg/dl):194.84±20.8<br>BMI (kg/m <sup>2</sup> ):<br>34.4±5.45 | <u>IG (n=38):</u><br>glimepiride 2 mg twice<br>daily + L-carnitine 1 gm<br>twice daily<br>vs.<br><u>CG (n=34):</u><br>glimepiride dose 2 mg<br>twice daily<br><u>Duration:</u> 6 months                                  | HbA1c, fasting glucose,<br>PPBG, fasting insulin,<br>extracellular part of<br>insulin regulated<br>aminopeptidase, tumor<br>necrosis factor-alpha,<br>visfatin and lipid panel,<br>BMI and homeostasis<br>model assessment of<br>insulin resistance | Change over 6 months:<br><u>HbA1c (%)</u> :<br>Benefit for IG: 7.41±0.5 vs. 9.5±0.78<br>(p<0.001)<br><u>fasting glucose (mg/dl)</u> :<br>Benefit for IG: 179.6±9.3 vs.<br>192.41±27.4 (p=0.018)                     |
| <b>Matter 2020</b><br>NCT03851055<br><br>RCT   | Egypt,<br>urban,<br>outpatients<br><br>08/2017 to<br>08/2018 | DM, treated with insulin, 10<br>to 18 yrs, transfusion<br>dependent beta-thalassemia<br>major<br><br>no other hemoglobinopathies<br>(e.g. a-thalassemia or sickle<br>thalassemia, disorders that<br>may affect glucose<br>homeostasis other than b-<br>TM, autoimmune diseases,<br>collagen diseases, hypo- or<br>hyperthyroidism, infections,<br>or tumours, or those who<br>were taking any vitamins or<br>food supplements < 1 month<br>before the study and<br>participating in a previous<br>investigational drug<br>study within 3 mo preceding<br>screening | n=80<br>52.5% females<br>age (yrs): 16.3±1.4<br>(range 12-18)<br>fasting glucose<br>(mg/dL): 144.5±22.4                                                 | diet schedule with<br>optimal macronutrient<br>distribution and<br>pharmacologic treatment<br><br><u>IG (n=40):</u><br>zinc gluconate<br>(2x20 mg/d)<br>vs.<br><u>CG (n=40):</u><br>placebo<br><u>Duration:</u> 3 months | <u>Primary:</u> fasting glucose<br><u>Secondary:</u> fructosamine,<br>fasting C-peptide, and<br>HOMA-IR<br><u>safety:</u> any AEs (e.g.<br>nausea, vomiting,<br>abdominal pain, diarrhea,<br>constipation, and<br>reduction of appetite)            | After 12 wks:<br>fasting glucose ( <u>mg/dL</u> ):<br>higher decrease with IG to 116.9±4.6<br>vs. 144.5±22.9 (p<0.001)<br><u>HbA1c (%)</u> :<br>higher in IG (no results reported)<br>no side effects were reported |
| <b>Moustafa</b>                                | Egypt,                                                       | DM2, newly diagnosed                                                                                                                                                                                                                                                                                                                                                                                                                                                                                                                                               | n=62                                                                                                                                                    | <u>IG (n=29, 21 analysed):</u>                                                                                                                                                                                           | Glycemic control,                                                                                                                                                                                                                                   | After 3 months:                                                                                                                                                                                                     |

| Study name<br>registration<br>number<br>Design | Setting<br>Place,<br>setting and<br>time                           | Population<br>Inclusion / Exclusion criteria                                                                                                                                                                                                                                                                           | Characteristics                                                                                                                                                                                                | Intervention vs. Control<br>Description with duration                                                                                                                                                                                 | Outcomes<br>Primary and secondary                                                                                                                           | Results<br>Longest follow-up period with<br>intervention effects (IG vs. CG) with<br>SD, 95%-CI or p value                                                                                                                                                                                                                                                                                                                                                                                                                                                                                                                                                       |
|------------------------------------------------|--------------------------------------------------------------------|------------------------------------------------------------------------------------------------------------------------------------------------------------------------------------------------------------------------------------------------------------------------------------------------------------------------|----------------------------------------------------------------------------------------------------------------------------------------------------------------------------------------------------------------|---------------------------------------------------------------------------------------------------------------------------------------------------------------------------------------------------------------------------------------|-------------------------------------------------------------------------------------------------------------------------------------------------------------|------------------------------------------------------------------------------------------------------------------------------------------------------------------------------------------------------------------------------------------------------------------------------------------------------------------------------------------------------------------------------------------------------------------------------------------------------------------------------------------------------------------------------------------------------------------------------------------------------------------------------------------------------------------|
| <b>2019</b><br><br>RCT                         | urban,<br>outpatients<br><br>recruitment<br>02/2016-<br>03/2018    | (within a time duration ≤6<br>months), 18–60 yrs<br><br>other antidiabetic<br>medications, pregnant and<br>lactating women, major<br>organ dysfunction (hepatic<br>failure, active hepatitis, liver<br>cirrhosis or renal<br>complications), changed their<br>standard medications during<br>the 12 weeks of the study | 72% females<br>HbA1c(%): 7.51±1.4<br>fasting glucose<br>(mg/dl): 154.4±51.6<br>BMI(kg/m <sup>2</sup> ): 33.9±6.1<br>family history of DM<br>(%): 78.5<br>retinopathy/altered<br>vision (%): 53<br>GDM (%): 9.2 | nigella sativa oil capsules<br>(3x 450 mg/d)<br>vs.<br><u>CG (n=33, 23 analysed):</u><br>metformin (2000 mg/d)<br><u>Duration:</u> 3 months                                                                                           | oxidative stress markers,<br>biochemical parameters,<br>weight/BMI/waist<br>circumference, total<br>antioxidant capacity TAC                                | <u>HbA1c (%)</u> :<br>no difference: 7.01±0.83 vs. 6.55±0.72<br><u>fasting glucose (mg/dl)</u> :<br>no difference: 119.8±23.7 vs.<br>120.7±25.4<br><u>Complications</u> :<br>no differences in occurrence of chills,<br>sweating, tachycardia, lethargy/<br>weakness, polydipsia, polyuria, dry<br>skin, polyphagia, blurred vision, foot<br>problems, or tingling/numbness<br>foot problems lower in IG: 4.8% vs.<br>33.3%, (p = 0.025).                                                                                                                                                                                                                        |
| <b>Ragheb 2020</b><br>NCT03437902<br><br>RCT   | Egypt,<br>urban,<br>outpatients<br>care<br><br>02/2019-<br>05/2018 | DM2, receiving standard oral<br>hypoglycemic agents,<br>≥ 35 yrs,<br><br>no history of overt vascular<br>disease, renal or hepatic<br>failure or antioxidant<br>supplementation or insulin<br>therapy, no change of oral<br>hypoglycemic drugs                                                                         | n=70<br>age (yrs): 54.9±8.4<br>70 % females<br>BMI (kg/m <sup>2</sup> ): 32.5±5.7<br>HbA1c(%): 8.50±1.86<br>fasting glucose<br>(mg/dl): 142.8±52.6                                                             | <u>IG2 (n=20):</u><br>Rutin (60) + vitamin C<br>(160 mg) 3x daily vs.<br><u>IG1 (n=20):</u><br>Vitamin C (500 mg) 1x<br>daily<br>vs.<br><u>CG (n=13):</u><br>only usual<br>oral antidiabetic<br>treatment<br><u>Duration:</u> 8 weeks | <u>Primary:</u> HbA1c,<br>oxidative stress marker,<br>antioxidant capacity,<br>insulin resistance, lipid<br>profile<br><u>Secondary:</u><br>Quality of life | After 2 months:<br><u>HbA1c (%)</u> :<br>no difference 7.494 ± 1.72 vs. 8.504 ±<br>2.059 vs. 8.504 ± 2.059 (p=0.1882)<br><u>fasting glucose (mg/dl)</u> :<br>lower in IG2 and CG: 111.3 (IQR 93.3-<br>135.2) vs. 144 (114.8-201) vs. 113.3<br>(94-152.2) (p=0.017)<br><u>Quality of life (SF 36)</u> :<br>• Benefit of physical functioning and<br>energy domains in IG2 vs. CG<br>(p=0.0049, p=0.0253).<br>• Benefit of role limitation to physical<br>health and emotional improved in<br>IG1 vs. CG (p=0.0267, p=0.0280)<br>• no difference between groups in<br>the other domains (emotional well-<br>being, social functioning, pain and<br>general health) |

1  
2  
3  
4  
5  
6  
7  
8  
9  
10  
11  
12  
13  
14  
15  
16  
17  
18  
19  
20  
21  
22  
23  
24  
25  
26  
27  
28  
29  
30  
31  
32  
33  
34  
35  
36  
37  
38  
39  
40  
41  
42  
43  
44  
45  
46

| Study name<br>registration<br>number<br>Design | Setting<br>Place,<br>setting and<br>time             | Inclusion / Exclusion criteria                                                                                                                                                                                                                                                                                                                                            | Population<br>Characteristics                                                                                                                                                                                                                                          | Intervention vs. Control<br>Description with duration                                                                                                                                                                                                                                           | Outcomes<br>Primary and secondary                                                                                                                                                                                                 | Results<br>Longest follow-up period with<br>intervention effects (IG vs. CG) with<br>SD, 95%-CI or p value                                                                                                                                                                                   |
|------------------------------------------------|------------------------------------------------------|---------------------------------------------------------------------------------------------------------------------------------------------------------------------------------------------------------------------------------------------------------------------------------------------------------------------------------------------------------------------------|------------------------------------------------------------------------------------------------------------------------------------------------------------------------------------------------------------------------------------------------------------------------|-------------------------------------------------------------------------------------------------------------------------------------------------------------------------------------------------------------------------------------------------------------------------------------------------|-----------------------------------------------------------------------------------------------------------------------------------------------------------------------------------------------------------------------------------|----------------------------------------------------------------------------------------------------------------------------------------------------------------------------------------------------------------------------------------------------------------------------------------------|
| <b>Rashad 2017</b><br><br>RCT                  | Egypt,<br>urban                                      | DM2, 50-62 yrs<br><br>no insulin medication,<br>allergies, recent thromboses<br>or uncontrollable<br>hypertension                                                                                                                                                                                                                                                         | n=34<br>43.3 % female<br>age (yrs): 55.5±6.15<br>HbA1c (%):6.75±1.2<br>fasting glucose<br>(mmol/l): 8.5±1.4<br>postprandial plasma<br>glucose(mmol/l):<br>15.6±3.3<br>BMI (kg/m <sup>2</sup> ):28.55±4<br>type of diabetes<br>duration of diabetes<br>(yrs): 6.1 ± 2.2 | <u>IG (n=17):</u><br>Balanites aegyptiaca<br>extract (400 mg))<br>vs.<br><u>CG: (n=17)</u><br>placebo capsules (potato<br>maltodextrin)<br><u>Duration: 8 wks</u>                                                                                                                               | glycemic markers, lipid<br>profile, FPG                                                                                                                                                                                           | Change over 8 wks:<br><u>2h postprandial plasma glucose:</u><br>benefit for IG :26.88% decrease vs. CG<br>2.6% increase<br><u>FPG (mmol/l):</u><br>benefit for IG: 7.8 ± 0.9 vs. CG: 8.5 ±<br>1.1                                                                                            |
| <b>Somanah 2012</b><br>NCT01248143<br><br>RCT  | Mauritius,<br>urban/rural<br><br>11/2010-<br>03/2011 | newly diagnosed DM, age 25–<br>60 yrs fasting glucose range:<br>5.1–5.9 mmol/L<br><br>no secondary complications,<br>non-smoker or stopped for ><br>6 months , alcoholic<br>consumption < 2 standard<br>drinks/day, post-menopausal<br>women without hormone<br>replacement treatment, no<br>glucose-lowering,<br>cholesterol-lowering or anti-<br>hypertension treatment | n=127<br>47% female<br>age (yrs): range 25–60<br>HbA1c (%): 5.99±0.4<br>fasting glucose<br>(mg/dL): 93.2±8.0<br>BMI (kg/m <sup>2</sup> ): 26.6 ±<br>3.7                                                                                                                | <u>IG (n=44):</u><br>supplementation of a<br>fermented papaya<br>preparation (6g/d twice<br>daily, over 12 wks),<br>followed by a 2 week<br>wash out period with the<br>same amount of water<br>vs.<br><u>CG (n=56):</u> consumed an<br>equivalent amount of<br>water<br><u>Duration: 14wks</u> | HbA1C fasting glucose,<br>Lipid profile, diet score,<br>blood pressure, alanine<br>aminotransferase;<br>aspartate<br>aminotransferase,<br>Ferritin, c-reactive<br>protein, uric acid,<br>microalbumin/urinary<br>creatinine ratio | After 14 wks:<br><u>HbA1c (%):</u><br>no difference (p=0.448)<br>fasting glucose ( <u>mg/dL</u> ):<br><ul style="list-style-type: none"> <li>remained relatively unchanged in<br/>boths genders:</li> <li>males: 96.2±17.0 vs. 87.6±11.7</li> <li>females: 95.6±15.8 vs. 94.3±5.0</li> </ul> |

**Strategies on treatment of DM related complications**





| Study name<br>registration<br>number<br>Design | Setting<br>Place,<br>setting and<br>time | Population<br>Inclusion / Exclusion criteria                                                                                                                                                                                                                                                                                                                                         | Population<br>Characteristics                                                                        | Intervention vs. Control<br>Description with duration                                                                                                                                                                                                               | Outcomes<br>Primary and secondary                                                                             | Results<br>Longest follow-up period with<br>intervention effects (IG vs. CG) with<br>SD, 95%-CI or p value                                                                                                                               |
|------------------------------------------------|------------------------------------------|--------------------------------------------------------------------------------------------------------------------------------------------------------------------------------------------------------------------------------------------------------------------------------------------------------------------------------------------------------------------------------------|------------------------------------------------------------------------------------------------------|---------------------------------------------------------------------------------------------------------------------------------------------------------------------------------------------------------------------------------------------------------------------|---------------------------------------------------------------------------------------------------------------|------------------------------------------------------------------------------------------------------------------------------------------------------------------------------------------------------------------------------------------|
|                                                |                                          | antibiotics, non-steroidal or anti-inflammatory drugs within the last 3 months, periodontal therapy ≤ 1 year, retinopathy grade 3/4, pregnancy, no contraceptive drugs                                                                                                                                                                                                               | (yrs): 8.1 ± 3.9<br>hypertension: 4.5%<br>neuropathy: 1.5%<br>retinopathy: 0.5%<br>nephropathy: 0%   |                                                                                                                                                                                                                                                                     |                                                                                                               |                                                                                                                                                                                                                                          |
| <b>Ghoneim 2013</b><br><br>RCT                 | Egypt,<br><br>03/2010-<br>03/2012        | DM, duration ≥ 15 yrs, bilateral diabetic macular edema (≥ 6 months)<br><br>no prior treatment with intravitreal corticosteroids, peribulbar steroid injection within ≤ 6 months, pars plana vitrectomy, history of glaucoma or steroid induced IOP elevation, ischemic maculopathy, foveal tracted, IOP≥ 23 mmHg                                                                    | n=19 (38 eyes)<br>89.5 % female<br>age (yrs): 52.3±11.4                                              | <u>IG (n=19):</u><br>one eye with 8 mg triamcinolone acetonide vs.<br><u>CG (n=19):</u><br>other eye with 4 mg of triamcinolone acetonide<br><br><u>Duration:</u> 6 months                                                                                          | <u>Primary:</u> Visual acuity<br><u>Others:</u> Intraocular pressure (IOP), IOP lowering drugs, complications | after 6 months:<br><u>Complications:</u><br>• no eyes with retinal detachment, vitreous haemorrhage, intraocular reaction or endophthalmitis.<br>• one eye in IG developed posterior subcapsular cataract.                               |
| <b>Nteleki 2015</b><br><br>RCT                 | South Africa,<br>urban                   | DM2 with neuropathic or mixed (venous and arterial) ulcers; lower extremity ulcer; stable or worsening ulcer that has been present for ≥ 4 weeks<br><br>no acute cellulitis, osteomyelitis, or gangrene, renal, hepatic, hematologic, neurologic, or immune disease not related to diabetes; presence of malignant disease not in remission for > 5 years; use of oral or parenteral | n=7 with 14 lower extremity ulcers<br>85 % male<br>age (yrs): 62<br>duration of diabetes (yrs): 16.7 | standard podiatric management <u>and</u><br><u>IG1 (n=2):</u><br>phototherapy to the regional lymphatic nodes and ulcer(s)<br>vs.<br><u>IG2 (n=3):</u><br>phototherapy on the ulcer<br>vs.<br><u>CG (n=2):</u><br>placebo phototherapy<br><u>Duration:</u> 12 weeks | healing rate (area and perimeter of the ulcer)                                                                | after 3 months:<br><u>Healing:</u><br>• The rate of healing increased in all three groups,<br>• 67% of ulcers received some form of phototherapeutic intervention, 40% of those ulcers resolved completely over 8 weeks<br>no <u>AEs</u> |

| Study name<br>registration<br>number<br>Design            | Setting<br>Place,<br>setting and<br>time                 | Population<br>Inclusion / Exclusion criteria                                                                                                                       | Characteristics                                                                                                                  | Intervention vs. Control<br>Description with duration                                                                                                                                                                                                                                                                                                                   | Outcomes<br>Primary and secondary                                                                                                           | Results<br>Longest follow-up period with<br>intervention effects (IG vs. CG) with<br>SD, 95%-CI or p value                                                                                                                                                                                                                                                                                   |
|-----------------------------------------------------------|----------------------------------------------------------|--------------------------------------------------------------------------------------------------------------------------------------------------------------------|----------------------------------------------------------------------------------------------------------------------------------|-------------------------------------------------------------------------------------------------------------------------------------------------------------------------------------------------------------------------------------------------------------------------------------------------------------------------------------------------------------------------|---------------------------------------------------------------------------------------------------------------------------------------------|----------------------------------------------------------------------------------------------------------------------------------------------------------------------------------------------------------------------------------------------------------------------------------------------------------------------------------------------------------------------------------------------|
|                                                           |                                                          | corticosteroids,<br>immunosuppressive, or<br>cytotoxic agents; known<br>infection with human<br>immunodeficiency virus or<br>presence of AIDS; other leg<br>ulcers |                                                                                                                                  |                                                                                                                                                                                                                                                                                                                                                                         |                                                                                                                                             |                                                                                                                                                                                                                                                                                                                                                                                              |
| <b>Saeed 2013</b><br><br>RCT                              | Egypt,<br>urban<br><br>11/2010-<br>07/2012               | DM, intractable diffuse<br>diabetic macular edema<br>without vitreomacular<br>traction.<br>central foveal thickness $\geq 300$<br>$\mu\text{m}$                    | n= 34 (34 eyes)<br>50% females<br>age (yrs): $55.5 \pm 8.9$<br>duration of diabetes<br>(yrs): $24 \pm 5.4$                       | <u>IG (n=15):</u><br>vitrectomy with removal<br>of the posterior hyaloid,<br>at the end of the<br>procedure injection of<br>intravitreal triamcinolone<br>acetate (IVTA, 0.1 mL,<br>40 mg/mL) +bevacizumab<br>(1.25 mg) +macular grid<br>laser photocoagulation<br>vs.<br><u>CG (n=15):</u><br>same intravitreal<br>injection combination<br><u>Duration:</u> 12 months | <u>primary:</u><br>BCVA, central foveal<br>thickness                                                                                        | Changes over 12 months<br><u>Complications:</u><br>• Changes in BCVA and central foveal<br>thickness at 3, 6, and 12 ( $P < 0.01$ ),<br>better mean BCVA in IG at 12 months.<br>• Better mean <u>central foveal thickness</u> in<br>IG at 12 months.<br><u>Major adverse events:</u><br>development of cataracts (3/15 vs.<br>6/15) and elevation of intraocular<br>pressure (7/15 vs. 2/15) |
| <b>Tsobgny-<br/>Tsague 2018</b><br>NCT02745015<br><br>RCT | Cameroon,<br>urban,<br>tertiary<br>care,<br><br>12/2014- | DM2, >11teeth, severe<br>chronic periodontitis<br>according to the 2012<br>CDC-AAP classification,<br><br>no periodontal treatment,                                | n=34<br>56% female<br>age (yrs): $51.4 \pm 8.8$<br>HbA1c (%): $9.3 \pm 1.3$<br>BMI ( $\text{kg}/\text{m}^2$ ): $28.3 \pm$<br>5.4 | <u>IG (n=17):</u><br>immediate ultrasonic<br>scaling, scaling and root<br>planning +subgingival<br>10% povidone iodine<br>irrigation                                                                                                                                                                                                                                    | <u>Primary:</u> change in HbA1c<br><u>Secondary:</u> Plaque index,<br>gingival bleeding index,<br>pocket depth, clinical<br>attachment loss | Change over 3 months:<br><u>HbA1c (%):</u><br>Benefit with IG: $6.7 \pm 2.0$ % vs. $8.1 \pm$<br>$2.6$ %, MD: 2.2 ( $p=0.029$ )<br><u>adverse events:</u><br>1 /15 patient reported tongue                                                                                                                                                                                                    |

| Study name<br>registration<br>number<br>Design                                                                                                                                                                                                                                                                                                                                                                                                                                                                                                                                                                                                                                                                                                                                                                                               | Setting<br>Place,<br>setting and<br>time   | Population<br>Inclusion / Exclusion criteria<br>Characteristics                                                                                                                                                                                                                                     | Intervention vs. Control<br>Description with duration                                                                                   | Outcomes<br>Primary and secondary                                                                                                                                                                                                                                                 | Results<br>Longest follow-up period with<br>intervention effects (IG vs. CG) with<br>SD, 95%-CI or p value                                                                                                                               |
|----------------------------------------------------------------------------------------------------------------------------------------------------------------------------------------------------------------------------------------------------------------------------------------------------------------------------------------------------------------------------------------------------------------------------------------------------------------------------------------------------------------------------------------------------------------------------------------------------------------------------------------------------------------------------------------------------------------------------------------------------------------------------------------------------------------------------------------------|--------------------------------------------|-----------------------------------------------------------------------------------------------------------------------------------------------------------------------------------------------------------------------------------------------------------------------------------------------------|-----------------------------------------------------------------------------------------------------------------------------------------|-----------------------------------------------------------------------------------------------------------------------------------------------------------------------------------------------------------------------------------------------------------------------------------|------------------------------------------------------------------------------------------------------------------------------------------------------------------------------------------------------------------------------------------|
|                                                                                                                                                                                                                                                                                                                                                                                                                                                                                                                                                                                                                                                                                                                                                                                                                                              | 05/2015                                    | alteration of DM treatment 6 mths prior to the study, onset of systemic diseases or an acute condition, use of immunosuppressive medications or others drugs or presence of conditions able to alter periodontitis clinical features                                                                | duration of diabetes (months): 55.5 ± 42.6 complications: neuropathy (%): 40 nephropathy (%): 7 retinopathy (%): 7 diabetic foot (%): 3 | vs.<br><u>CG(n=17):</u><br>periodontal treatment 3 months later<br><u>Duration: 3 months</u>                                                                                                                                                                                      | irritation following chlorhexidine moth rinse in IG                                                                                                                                                                                      |
| <b>Yakoot 2019</b><br><br>NCT01531517<br><br>RCT                                                                                                                                                                                                                                                                                                                                                                                                                                                                                                                                                                                                                                                                                                                                                                                             | Egypt,<br>urban<br><br>07/2011-<br>07/2013 | Adult DM2 or DM1 patients, limb-threatening diabetic foot ulcerations<br><br>no life-threatening extensive gangrenous lesions that needed immediate amputations; bad general condition; shock or unstable vital signs; critically ill with severe organ/system dysfunctions or advanced malignancy. | n=119<br>gender:44.5% female<br>age (yrs): 54.7 ±8.4<br>type of diabetes:<br>• DM1: 22.9%<br>• DM2: 86.2%                               | conservative debridement of necrotic tissue and irrigation with warm normal saline and<br><u>IG (n=61):</u><br>local application of ointment composed of royal jelly and panthenol<br><br>vs.<br><u>CG (n=58):</u><br>local application of Panthenol<br><u>duration: 12months</u> | <u>primary:</u> complete healing<br><u>secondary:</u> reduction of infection in the ulcer site, al reaction that may be due to study drug<br><br>after 12 months rate of complete healing (%):<br>Benefit for IG: 32.4% vs. 12%; p=0.034 |
| <p>ADA: American Diabetes Association; BCVA: Best-corrected visual acuity; BMI: Body mass index; CG: Control group; CI: Confidence interval; CHC: Community health centre; DBP: Diastolic blood pressure; DM: diabetes mellitus; DM1: Type 1 diabetes; DM2: type 2 diabetes; FPG: fasting plasma glucose; HbA1c: haemoglobin A1c; IG: intervention group; IQR: interquartile range; n: number of participants; NCD: Non-communicable disease; NPH: neutral protamine Hagedorn; MD: mean difference; MDa: adjusted mean difference; NCD: Non-communicable disease ;RCT: randomized controlled trial; RR: Relative risk; RRa: adjusted relative risk; SAE: Serious adverse events; SBP: Systolic blood pressure; SCI: Diabetes Self-Care Inventory; SD: Standard-deviation; SMBG: self-monitoring of blood glucose; wks: weeks; yrs: years</p> |                                            |                                                                                                                                                                                                                                                                                                     |                                                                                                                                         |                                                                                                                                                                                                                                                                                   |                                                                                                                                                                                                                                          |

**Supplementary Table 3:** Characteristics and results of studies on patients with DM2

## RCTs on pregnant DM patients

| Study name<br>registration<br>number<br>Design  | Setting<br>Place,<br>setting and<br>time    | Population<br>Inclusion / Exclusion criteria<br>Characteristics                                                                                                                                                                                                                                                                                                                                                                                                                                                 | Intervention vs.<br>Control<br>Description with<br>duration                                                                                                                                                                                                             | Outcomes<br>Primary and secondary                                                                                                                                                                                                                                                       | Results<br>Longest follow-up period<br>with intervention effects<br>(IG vs. CG) with SD, 95%-<br>CI or p value     | Study name<br>registration number<br>Design                                                                                                                                                                                                        |
|-------------------------------------------------|---------------------------------------------|-----------------------------------------------------------------------------------------------------------------------------------------------------------------------------------------------------------------------------------------------------------------------------------------------------------------------------------------------------------------------------------------------------------------------------------------------------------------------------------------------------------------|-------------------------------------------------------------------------------------------------------------------------------------------------------------------------------------------------------------------------------------------------------------------------|-----------------------------------------------------------------------------------------------------------------------------------------------------------------------------------------------------------------------------------------------------------------------------------------|--------------------------------------------------------------------------------------------------------------------|----------------------------------------------------------------------------------------------------------------------------------------------------------------------------------------------------------------------------------------------------|
| <b>Strategies to increase physical activity</b> |                                             |                                                                                                                                                                                                                                                                                                                                                                                                                                                                                                                 |                                                                                                                                                                                                                                                                         |                                                                                                                                                                                                                                                                                         |                                                                                                                    |                                                                                                                                                                                                                                                    |
| <b>Embaby<br/>2016</b><br><br>RCT               | Egypt,<br>urban,<br><br>07/2014-<br>02/2015 | at increased risk for GDM due<br>to obesity (BMI $\geq$ 30 kg/m <sup>2</sup> ),<br>age: $>$ 25 yrs,<br>20-24th gestational wks,<br>multigravida, physically active<br>with $\geq$ 1 of the following 3<br>characteristics: history of<br>macrosomia, abnormal<br>glucose tolerance during<br>previous pregnancy or first<br>grade relative with DM2<br><br>no hypertension, GDM,<br>medications that affects<br>insulin secretion, serious<br>pulmonary disease, cardiac,<br>renal impairment and<br>malignancy | n=40<br>100% female<br>age (yrs): 29.2 $\pm$ 3.8<br>BMI (kg/m <sup>2</sup> ):28.7 $\pm$ 1.3<br>fasting glucose<br>(mmol/l): 6.5 $\pm$ 0.9<br>fasting insulin (IU/l):<br>15.78 $\pm$ 1.58                                                                                | <u>IG:</u><br>aerobic exercise program<br>(walking on treadmill)<br>three times weekly until<br>the end of 37 wks of<br>gestation + diet control.<br>vs.<br><u>CG:</u><br>diet control with usual<br>care given by<br>obstetricians and<br>midwives.<br><u>Duration:</u> appr. 4 months | Fasting plasma glucose,<br>Insulin level                                                                           | Change to 37 <sup>th</sup> week of gestation:<br><u>FPG (mmol/l)</u><br>Benefit for IG: 4.26 $\pm$ 0.67 vs. 5.07 $\pm$ 0.54<br>(p=0.0001)<br><u>Fasting insulin (IU/l):</u><br>Benefit for IG: 10.59 $\pm$ 1.10 vs.<br>12.43 $\pm$ 1.44 (p=0.0001) |
| <b>Other non-pharmacological therapies</b>      |                                             |                                                                                                                                                                                                                                                                                                                                                                                                                                                                                                                 |                                                                                                                                                                                                                                                                         |                                                                                                                                                                                                                                                                                         |                                                                                                                    |                                                                                                                                                                                                                                                    |
| <b>EI-Shamy<br/>2018</b><br><br>RCT             | Egypt,<br>urban<br><br>12/2016-<br>05/2017  | GDM, age: 20-30 yrs,<br>gestational age: 24-26 wks,<br>BMI $\leq$ 30 kg/m <sup>2</sup> , singleton live<br>fetus<br><br>no high-risk pregnancy, bad<br>obstetric situations or<br>diseases, smoking, oral<br>sedatives                                                                                                                                                                                                                                                                                          | n=30<br>100% female<br>age (yrs): 24.2 $\pm$ 2.8<br>75 g OGTT (mg/dl):<br><ul style="list-style-type: none"> <li>fasting glucose:<br/>129.05<math>\pm</math>0.6</li> <li>2h postprandial:<br/>146<math>\pm</math>1.65</li> </ul> BMI (kg/m <sup>2</sup> ): 27 $\pm$ 1.5 | <u>IG (n=15):</u><br>acupressure + standard<br>antenatal care<br>vs.<br><u>CG (n=15):</u><br>standard antenatal care<br>only<br><u>Duration:</u> 12 weeks                                                                                                                               | Primary:<br>glycemic control,<br>requirement for insulin,<br>insulin resistance<br>Secondary:<br>neonatal outcomes | Change over 3 months:<br>75 g OGTT (mg/dl):<br>Fasting: 116.1 $\pm$ 0.1 vs. 118.2 $\pm$ 0.7<br>2h postprandial:<br>125.3 $\pm$ 1.2 vs. 127.3 $\pm$ 0.9<br>Complication (%):<br>5-min Apgar-Score < 7: 6.7 vs. 6.7 %                                |



|                                                                                                                                                                      |                                                         |                                            |                                                                                                                                                                                                                                                                                                                                                                                                     |                                                                                                                                                                                                                        |                                                                                                                                                                                                                                                                                                                                                                                                                     |                                                                                                                                                                                                                                                                                                                                                                                                                                                                                                 |                                                                                                                                                                                                                                                                                                                                                                                                                                                                                                                                                                                                                                                                                        |
|----------------------------------------------------------------------------------------------------------------------------------------------------------------------|---------------------------------------------------------|--------------------------------------------|-----------------------------------------------------------------------------------------------------------------------------------------------------------------------------------------------------------------------------------------------------------------------------------------------------------------------------------------------------------------------------------------------------|------------------------------------------------------------------------------------------------------------------------------------------------------------------------------------------------------------------------|---------------------------------------------------------------------------------------------------------------------------------------------------------------------------------------------------------------------------------------------------------------------------------------------------------------------------------------------------------------------------------------------------------------------|-------------------------------------------------------------------------------------------------------------------------------------------------------------------------------------------------------------------------------------------------------------------------------------------------------------------------------------------------------------------------------------------------------------------------------------------------------------------------------------------------|----------------------------------------------------------------------------------------------------------------------------------------------------------------------------------------------------------------------------------------------------------------------------------------------------------------------------------------------------------------------------------------------------------------------------------------------------------------------------------------------------------------------------------------------------------------------------------------------------------------------------------------------------------------------------------------|
| 1<br>2<br>3<br>4<br>5<br>6<br>7<br>8<br>9<br>10<br>11<br>12<br>13<br>14<br>15<br>16<br>17<br>18                                                                      | <b>Beyuo 2015</b><br>ACTRN126140<br>00942651<br><br>RCT | Ghana,<br>urban<br><br>01/2013-<br>12/2013 | pregnant women with DM2<br>or GDM (plasma glucose<br>≥7 mmol/l after an overnight<br>fast or plasma glucose<br>concentration ≥11.1 mmol/l 2<br>hours after a 75 g glucose<br>drink), 20-30 wks gestation,<br>age: 18-45yrs, eligible for<br>insulin therapy<br><br>no T1DM, DM2 who have<br>previously failed to achieve<br>glycemic control on<br>metformin monotherapy,<br>allergies to metformin | n= 104<br>100% female<br>age (yrs): 33.3±4.6<br>fasting glucose<br>(mmol/l): 8<br>2HPG (mmol/l): 10.5<br>BMI (kg/m <sup>2</sup> ): 3.1±6.6<br>type of diabetes:<br>GDM (%): 65.9<br>DM2 (%): 34.0                      | <u>IG (n=52):</u><br>Metformin (starting with<br>500 mg / d, gradually<br>increase over 2 wks to a<br>maximum dose of 2500<br>mg/d, insulin was added<br>if necessary)<br>vs.<br><u>CG (n=52):</u><br>insulin treatment (daily<br>dose 0.3 IU/kg, titrated to<br>achieve the glycemic<br>targets, if necessary,<br>admission to the ward<br>and therapy with soluble<br>insulin)<br><u>Duration: until delivery</u> | Primary: 2-hour post<br>prandial blood glucose<br>(2HPG)<br>Secondary: fasting<br>glucose, 1HPG, maternal<br>weight gain, pregnancy<br>outcome and feto-<br>neonatal outcomes.                                                                                                                                                                                                                                                                                                                  | Change from enrolment to delivery:<br>glycemic control (mmol/l):<br>fasting glucose:<br>no difference: 6.42±0.98 vs. 6.62±1.57<br>(p=0.928)<br>1HPG:<br>no difference: 8.95±1.27 vs. 9.62±1.44<br>(p=0.078)<br>2HPG:<br>benefit for IG: 7.84±1.43 vs. 9.05±1.89<br>(p=0.004)                                                                                                                                                                                                                                                                                                                                                                                                           |
| 19<br>20<br>21<br>22<br>23<br>24<br>25<br>26<br>27<br>28<br>29<br>30<br>31<br>32<br>33<br>34<br>35<br>36<br>37<br>38<br>39<br>40<br>41<br>42<br>43<br>44<br>45<br>46 | <b>Ibrahim 2014</b><br>NCT01915550<br><br>RCT           | Egypt,<br>urban<br><br>08/2011-<br>04/2012 | GDM or pre-existing DM,<br>gestational age 20-34 wks<br>with insulin resistance<br>No DM1, secondary diabetes<br>or liver or renal impairment                                                                                                                                                                                                                                                       | n=90<br>100% female<br>age (yrs): 29.8 ± 5.4<br>BMI (kg/m <sup>2</sup> ):31.83 ±<br>3.23<br>Gestational age: 28.7<br>± 3.7 wks<br>GDM: 43.3 %<br>Pre-existing DM:<br>56.7 % with median<br>duration of 4 (1-15)<br>yrs | <u>IG (n=46):</u><br>Metformin (1500 mg,<br>raised to 2000 mg)<br>without increasing insulin<br>dose<br>Patients switched to CG if<br>treatment was not<br>successful to control<br>blood glucose<br>concentrations<br><u>CG (n=44):</u><br>insulin dose was<br>increased according to<br>the standard protocol                                                                                                     | Primary:<br>maternal glycemic control<br>(fasting glucose<br>≤ 95 mg/dl and 2-HPG<br>≤ 120 mg/dl)<br>Secondary:<br>maternal bouts of<br>hypoglycemia, need for<br>another hospital<br>admission for<br>uncontrolled diabetes<br>during pregnancy,<br>gestational age at<br>delivery, mode of<br>delivery, birth weight,<br>birth trauma, congenital<br>anomalies, Apgar score,<br>neonatal hypoglycemia,<br>need for neonatal<br>intensive care unit<br>admission, adverse<br>neonatal outcomes | glycemic control:<br><ul style="list-style-type: none"> <li>• better for CG: 76.1 vs. 100 %<br/>reached glycemic control (p=0.001)</li> <li>• 13 vs. 18.2 % had readmission for<br/>poor glycemic control</li> <li>• 6.5 vs. 22.7 % had bouts of<br/>maternal hypoglycaemia</li> </ul> Complications:<br><ul style="list-style-type: none"> <li>• 23.3 vs. 30.8 % had fetal<br/>macrosomia</li> <li>• 1 new-born in each group had<br/>congenital malformations</li> <li>• 7 vs. 38.5 % had neonatal<br/>hypoglycaemia</li> <li>• 18.6 vs. 41 % had NICU admission</li> <li>• 0 vs. 5.1 % had stillbirths</li> <li>• 11.6 vs. 25.6 % with respiratory<br/>distress syndrome</li> </ul> |

1  
2  
3  
4  
5  
6  
7  
8  
9  
10  
11  
12  
13  
14  
15  
16  
17  
18  
19  
20  
21  
22  
23  
24  
25  
26  
27  
28  
29  
30  
31  
32  
33  
34  
35  
36  
37  
38  
39  
40  
41  
42  
43  
44  
45  
46

BMI: Body mass index; CG: Control group; CI: Confidence interval; DM: diabetes mellitus; DM2: type 2 diabetes; FPG: fasting plasma glucose; GDM: gestational diabetes; HbA1c: haemoglobin A1c; 1 / 2HPG: 1 / 2-hour post prandial blood glucose; IG: intervention group; n: number of participants; MD: mean difference; MDa: adjusted mean difference; OGTT: Oral glucose tolerance test; RCT: randomized controlled trial; RR: Relative risk; RRa: adjusted relative risk; SD: Standard-deviation; wks: weeks; yrs: years

**Supplementary Table 4:** Characteristics and results of studies on pregnant women with DM

For peer review only



### Risk of bias

| Study            | Sequence generation | Allocation concealment | Blinding of participants/personnel | Blinding of outcome assessors | Incomplete outcome data | Selective outcome reporting | Other risk of bias |
|------------------|---------------------|------------------------|------------------------------------|-------------------------------|-------------------------|-----------------------------|--------------------|
| Abaza 2017       |                     |                        |                                    |                               |                         |                             |                    |
| Abdulrhman 2013  |                     |                        |                                    |                               |                         |                             |                    |
| Adibe 2013       |                     |                        |                                    |                               |                         |                             |                    |
| Adjei 2015       |                     |                        |                                    |                               |                         |                             |                    |
| Ali 2019         |                     |                        |                                    |                               |                         |                             |                    |
| Amendezo 2017    |                     |                        |                                    |                               |                         |                             |                    |
| Anderson 2001    |                     |                        |                                    |                               |                         |                             |                    |
| Anyanwu 2016     |                     |                        |                                    |                               |                         |                             |                    |
| Ashoush 2016     |                     |                        |                                    |                               |                         |                             |                    |
| Asuako 2017      |                     |                        |                                    |                               |                         |                             |                    |
| Beyuo 2015       |                     |                        |                                    |                               |                         |                             |                    |
| Chraibi 2017     |                     |                        |                                    |                               |                         |                             |                    |
| Debussche 2018   |                     |                        |                                    |                               |                         |                             |                    |
| Distiller 2014   |                     |                        |                                    |                               |                         |                             |                    |
| Elbarbary 2016   |                     |                        |                                    |                               |                         |                             |                    |
| Elbarbary 2018   |                     |                        |                                    |                               |                         |                             |                    |
| Elbarbary 2020   |                     |                        |                                    |                               |                         |                             |                    |
| El Gayar 2019    |                     |                        |                                    |                               |                         |                             |                    |
| El-Haggag 2015   |                     |                        |                                    |                               |                         |                             |                    |
| El-Makaky 2020   |                     |                        |                                    |                               |                         |                             |                    |
| El-Shamy 2018    |                     |                        |                                    |                               |                         |                             |                    |
| El-Sharkawy 2016 |                     |                        |                                    |                               |                         |                             |                    |
| El-Sheikh 2019   |                     |                        |                                    |                               |                         |                             |                    |
| Embaby 2016      |                     |                        |                                    |                               |                         |                             |                    |
| Essien 2017      |                     |                        |                                    |                               |                         |                             |                    |
| Fairall 2016     |                     |                        |                                    |                               |                         |                             |                    |
| Fayehun 2018     |                     |                        |                                    |                               |                         |                             |                    |
| Ghoneim 2013     |                     |                        |                                    |                               |                         |                             |                    |
| Hailu 2018       |                     |                        |                                    |                               |                         |                             |                    |
| Ibrahim 2014     |                     |                        |                                    |                               |                         |                             |                    |
| Krawinkel 2018   |                     |                        |                                    |                               |                         |                             |                    |

| Study               | Sequence generation | Allocation concealment | Blinding of participants/personnel | Blinding of outcome assessors | Incomplete outcome data | Selective outcome reporting | Other risk of bias |
|---------------------|---------------------|------------------------|------------------------------------|-------------------------------|-------------------------|-----------------------------|--------------------|
| Labhardt 2011       | 😊                   | 😊                      | 😞                                  | 😊                             | 😊                       | 😊                           | 😊                  |
| Maharaj 2016        | 😊                   | 😊                      | 😞                                  | 😊                             | 😊                       | 😊                           | 😞                  |
| Malek 2015          | 😊                   | 😊                      | 😞                                  | 😊                             | 😊                       | 😊                           | 😊                  |
| Malipa 2013         | 😊                   | 😊                      | 😞                                  | 😞                             | 😊                       | 😊                           | 😞                  |
| Mash 2014           | 😊                   | 😊                      | 😞                                  | 😞                             | 😞                       | 😊                           | 😊                  |
| Matter 2020         | 😊                   | 😊                      | 😊                                  | 😊                             | 😊                       | 😞                           | 😊                  |
| Mohamad 2009        | 😊                   | 😊                      | 😞                                  | 😊                             | 😊                       | 😊                           | 😞                  |
| Moustafa 2019       | 😊                   | 😊                      | 😞                                  | 😊                             | 😞                       | 😊                           | 😞                  |
| Muchiri 2015        | 😊                   | 😊                      | 😞                                  | 😊                             | 😊                       | 😊                           | 😞                  |
| Nteleki 2015        | 😞                   | 😊                      | 😞                                  | 😊                             | 😊                       | 😊                           | 😞                  |
| Owolabi 2019        | 😊                   | 😊                      | 😞                                  | 😊                             | 😊                       | 😞                           | 😞                  |
| Rashad 2017         | 😊                   | 😊                      | 😊                                  | 😊                             | 😞                       | 😊                           | 😞                  |
| Ragheb 2020         | 😊                   | 😊                      | 😞                                  | 😞                             | 😞                       | 😊                           | 😊                  |
| RezkAllah 2019      | 😊                   | 😊                      | 😞                                  | 😊                             | 😊                       | 😊                           | 😊                  |
| Saeed 2013          | 😊                   | 😊                      | 😞                                  | 😞                             | 😞                       | 😊                           | 😞                  |
| Salem 2010          | 😊                   | 😊                      | 😞                                  | 😞                             | 😊                       | 😊                           | 😞                  |
| Sodipo 2017         | 😊                   | 😊                      | 😞                                  | 😊                             | 😞                       | 😊                           | 😊                  |
| Somanah 2012        | 😊                   | 😊                      | 😞                                  | 😊                             | 😞                       | 😞                           | 😞                  |
| Steyn 2013          | 😊                   | 😊                      | 😞                                  | 😊                             | 😞                       | 😊                           | 😊                  |
| Takenga 2014        | 😊                   | 😊                      | 😞                                  | 😊                             | 😊                       | 😊                           | 😞                  |
| Tawfik 2016         | 😊                   | 😊                      | 😊                                  | 😊                             | 😞                       | 😊                           | 😊                  |
| Thuita 2020         | 😊                   | 😊                      | 😞                                  | 😊                             | 😊                       | 😊                           | 😊                  |
| Tsobgny-Tsague 2018 | 😊                   | 😊                      | 😞                                  | 😊                             | 😞                       | 😊                           | 😊                  |
| Utz 2018            | 😊                   | 😊                      | 😞                                  | 😊                             | 😊                       | 😞                           | 😞                  |
| Van der Hoogt 2017  | 😊                   | 😊                      | 😞                                  | 😊                             | 😞                       | 😊                           | 😞                  |
| Van Rooijen 2004    | 😊                   | 😊                      | 😞                                  | 😊                             | 😊                       | 😊                           | 😞                  |
| Webb 2015           | 😊                   | 😊                      | 😊                                  | 😊                             | 😞                       | 😊                           | 😊                  |
| Yakoot 2019         | 😊                   | 😊                      | 😞                                  | 😞                             | 😊                       | 😞                           | 😞                  |
| Yan 2014            | 😊                   | 😊                      | 😞                                  | 😊                             | 😊                       | 😊                           | 😞                  |

😊: low, 😞: unclear, 😞: high risk of bias

Supplementary Table 5: Judgements on risk of bias

## Randomized controlled trials on prevention, diagnosis and treatment of diabetes in African countries: a systematic review

Susanne Unverzagt, Angelika S. Sandholzer, Thomas Frese, Yeabsra Mesfinin

### Citation

Susanne Unverzagt, Angelika S. Sandholzer, Thomas Frese, Yeabsra Mesfinin. Randomized controlled trials on prevention, diagnosis and treatment of diabetes in African countries: a systematic review. PROSPERO 2019 CRD42019122785 Available from: [https://www.crd.york.ac.uk/prospéro/display\\_record.php?ID=CRD42019122785](https://www.crd.york.ac.uk/prospéro/display_record.php?ID=CRD42019122785)

### Review question

To summarize available evidence from randomized controlled trials on prevention, diagnosis and treatment of diabetes initiated from African countries.

### Searches

Randomized controlled trials without time or date restriction, in English or German language. Electronic databases: MEDLINE and Cochrane Central Register of Controlled Trials (CENTRAL), registers of ongoing and completed trials ([www.ClinicalTrials.gov](http://www.ClinicalTrials.gov), [apps.who.int/trialsearch](http://apps.who.int/trialsearch)).

Results will be screened by 2 independent authors. Discrepancies will be resolved by discussion between the authors or with a third author.

### Types of study to be included

Randomized controlled trials on prevention, diagnosis and treatment of diabetes.

### Condition or domain being studied

Diabetes mellitus (type 1 and type 2), gestational diabetes.

### Participants/population

African patients in primary, secondary and tertiary prevention, diagnosis and treatment of diabetes.

### Intervention(s), exposure(s)

All preventive, diagnostic and curative interventions on diabetes.

### Comparator(s)/control

Another intervention, or none.

### Main outcome(s)

Primary outcome: all-cause mortality during the longest reported follow-up period (measured from randomisation).

Secondary outcomes: glucose control (HbA1c, insulin resistance, oral glucose tolerance test, fasting serum or plasma glucose), complications, quality of life, hospital admission, treatment adherence (at longest follow-up).

### \* Measures of effect

Within the longest reported follow-up period.

### Additional outcome(s)

Cost.

### \* Measures of effect

Within the longest reported follow-up period.

### Data extraction (selection and coding)

One authors will extract information on study population (diabetes type 1, type 2, gestational diabetes), intervention and outcome by using an assessment form, which will be designed especially for the topic of this review and tested for five studies. A second author will check all extractions, unclear information will be discussed. The data extraction form will include at least the following items: title, author, reference, study design, country, duration, follow-up, indication of patients (primary, secondary, tertiary prevention), sample size per group, description of intervention and control (drugs, devices, strategies), primary and secondary outcomes with results.

### Risk of bias (quality) assessment

Risk of bias will be described and judged on the basis of the Cochrane risk of bias tool in seven specific domains: 1.

Sequence generation (judgement per study) 2. Allocation concealment (judgement per study) 3. Blinding of participants and personnel (judgement per study and outcome) 4. Blinding of outcome assessors (judgement per study and outcome) 5. Incomplete outcome data (judgement per study and outcome) 6. Selective outcome reporting (judgement per study and outcome) 7. Other sources of bias (judgement per study and outcome). We will judge risk of bias domains as 'low', 'high' or 'unclear' and will evaluate individual bias items and present a summary figure to illustrate these findings.

Discrepancies will be resolved by discussion between the authors or with a third author.

### Strategy for data synthesis

We plan a narrative synthesis to get a comprehensive overview on this area of research. We add a meta-analysis with the random-effects model on our primary and secondary outcomes on the basis of aggregated information (Hazard ratio, Relative risks or Odds Ratio) if included studies are sufficiently homogeneous in population, intervention, and outcomes and results show no substantial heterogeneity. We will use the Review Manager for data synthesis.

### Analysis of subgroups or subsets

Study population (diabetes type 1, type 2, gestational diabetes), prevention, diagnosis and treatment type of prevention (primary, secondary and tertiary), type of intervention (drugs, devices, strategies) and regions (northern, eastern, central, southern Africa).

### Contact details for further information

Susanne Unverzagt  
susanne.unverzagt@medizin.uni-halle.de

### Organisational affiliation of the review

Institute of General Practice and Family Medicine, Institute for Medical Epidemiology, Biostatistics and Informatics, Martin-Luther-University Halle-Wittenberg and Independent Department for General Medicine, University of Leipzig

<https://www.mezizin.uni-halle.de/index.php?id=7167&L=1%27andchar%28124%29>

### Review team members and their organisational affiliations

Dr Susanne Unverzagt. Institute of General Practice and Family Medicine, Institute of Medical Epidemiology, Biostatistics and Informatics, University Halle / Wittenberg

Angelika S. Sandholzer. MD student, Institute of General Practice and Family Medicine, University Halle / Wittenberg

Professor Thomas Frese. Institute of General Practice and Family Medicine, Institute of Medical Epidemiology, Biostatistics and Informatics, University Halle / Wittenberg

Yeabsra Mesfinin. School of Public Health, Addis Ababa University

### Collaborators

Dr Eva Kantelhardt. Institute of Medical Epidemiology, Biostatistics and Informatics, University Halle / Wittenberg

### Type and method of review

Meta-analysis, Narrative synthesis, Systematic review

**Anticipated or actual start date**

15 November 2018

**Anticipated completion date**

31 December 2019

**Funding sources/sponsors**

DAAD ("Chronic disease health service teaching and research"), project 57216764

**Conflicts of interest**

**Language**

English

**Country**

Ethiopia, Germany

**Stage of review**

Review Ongoing

**Subject index terms status**

Subject indexing assigned by CRD

**Subject index terms**

Africa; Diabetes Mellitus, Type 2; Humans; Randomized Controlled Trials as Topic

**Date of registration in PROSPERO**

25 March 2019

**Date of first submission**

28 January 2019

**Stage of review at time of this submission**

| Stage                                                           | Started | Completed |
|-----------------------------------------------------------------|---------|-----------|
| Preliminary searches                                            | Yes     | No        |
| Piloting of the study selection process                         | Yes     | No        |
| Formal screening of search results against eligibility criteria | Yes     | No        |
| Data extraction                                                 | No      | No        |
| Risk of bias (quality) assessment                               | No      | No        |
| Data analysis                                                   | No      | No        |

*The record owner confirms that the information they have supplied for this submission is accurate and complete and they understand that deliberate provision of inaccurate information or omission of data may be construed as scientific misconduct.*

*The record owner confirms that they will update the status of the review when it is completed and will add publication details in due course.*

1  
2  
3  
4 **Versions**

5 25 March 2019  
6 07 August 2019  
7  
8

9 **PROSPERO**

10 This information has been provided by the named contact for this review. CRD has accepted this information in good  
11 faith and registered the review in PROSPERO. The registrant confirms that the information supplied for this submission  
12 is accurate and complete. CRD bears no responsibility or liability for the content of this registration record, any  
13 associated files or external websites.  
14  
15  
16  
17  
18  
19  
20  
21  
22  
23  
24  
25  
26  
27  
28  
29  
30  
31  
32  
33  
34  
35  
36  
37  
38  
39  
40  
41  
42  
43  
44  
45  
46  
47  
48  
49  
50  
51  
52  
53  
54  
55  
56  
57  
58  
59  
60

For peer review only

## Search strategies

### Medline (Ovid)

Search on 19.11.2018, 1470 references, Update from 2018 to Current on 20.08.2020: 541 references

| Nr.       | Searches                                                            |
|-----------|---------------------------------------------------------------------|
| 1.        | exp Diabetes Mellitus/                                              |
| 2.        | Diabetes.tw                                                         |
| <b>3.</b> | <b>or/1-2</b>                                                       |
| 4.        | Africa.tw                                                           |
| 5.        | Exp Africa/                                                         |
| 6.        | Algeria\$.tw or exp Algeria/                                        |
| 7.        | Angol\$.tw or exp Angola/                                           |
| 8.        | Benin\$.tw or exp Benin/                                            |
| 9.        | Botswan\$.tw or exp Botswana/                                       |
| 10.       | Burkina Faso.tw or exp Burkina Faso/                                |
| 11.       | Burund\$.tw or exp Burundi/                                         |
| 12.       | Cameroon\$.tw or exp Cameroon/                                      |
| 13.       | Cape Verde.tw or exp Cape Verde/                                    |
| 14.       | Central African Republic\$.tw or exp Central African Republic/      |
| 15.       | Chad\$.tw or exp Chad/                                              |
| 16.       | Comoros\$.tw or exp Comoros/                                        |
| 17.       | Cote d'Ivoire.tw or exp Cote d'Ivoire/                              |
| 18.       | Democratic Republic of Congo.tw or exp Democratic Republic of Congo |
| 19.       | Djibout\$.tw or exp Djibouti/                                       |
| 20.       | Egypt\$.tw or exp Egypt/                                            |
| 21.       | Equatorial Guinea\$.tw or exp Equatorial Guinea/                    |
| 22.       | Eritrea\$.tw or exp Eritrea/                                        |
| 23.       | Ethiop\$.tw or exp Ethiopia/                                        |
| 24.       | Gabon\$.tw or exp Gabon/                                            |
| 25.       | Gambia\$.tw or exp Gambia/                                          |
| 26.       | Ghana\$.tw or exp Ghana/                                            |
| 27.       | Guinea\$.tw or exp Guinea/                                          |
| 28.       | Guinea-Bissau.tw or exp Guinea-Bissau/                              |
| 29.       | Kenya\$.tw or exp Kenya/                                            |
| 30.       | Lesoth\$.tw or exp Lesotho/                                         |
| 31.       | Liberia\$.tw or exp Liberia/                                        |
| 32.       | Libya\$.tw or exp Libya/                                            |
| 33.       | Madagascar\$.tw or exp Madagascar/                                  |
| 34.       | Malawi\$.tw or exp Malawi/                                          |

| Nr. | Searches                                     |
|-----|----------------------------------------------|
| 35. | Mali.tw or exp Mali/                         |
| 36. | Mauritania\$.tw or exp Mauritania/           |
| 37. | Mauritius\$.tw or exp Mauritius/             |
| 38. | Morocc\$.tw or exp Morocco/                  |
| 39. | Mozambique\$.tw or exp Mozambique/           |
| 40. | Namibia\$.tw or exp Namibia/                 |
| 41. | Niger.tw or exp Niger/                       |
| 42. | Nigeria\$.tw or exp Nigeria/                 |
| 43. | Rwanda\$.tw or exp Rwanda/                   |
| 44. | (Sao Tome and Principe).tw                   |
| 45. | Senegal\$.tw or exp Senegal/                 |
| 46. | Seychell\$.tw                                |
| 47. | Sierra Leone.tw or exp Sierra Leone/         |
| 48. | Somalia\$.tw or exp Somalia/                 |
| 49. | South Africa\$.tw or exp South Africa.de     |
| 50. | South Sudan.tw or exp South Sudan/           |
| 51. | Sudan\$.tw or exp Sudan/                     |
| 52. | Swaziland\$.tw or exp Swaziland/             |
| 53. | Tanzania\$.tw or exp Tanzania/               |
| 54. | Togo\$.tw or exp Togo/                       |
| 55. | Tunisia\$.tw or exp Tunisia/                 |
| 56. | Uganda\$.tw or exp Uganda/                   |
| 57. | Zambia\$.tw or exp Zambia/                   |
| 58. | Zimbabwe\$.tw or exp Zimbabwe/               |
| 59. | Somaliland\$.tw or exp Somaliland/           |
| 60. | Sahrawi Arab Democratic Republic.tw.         |
| 61. | or/4-60                                      |
| 62. | randomized controlled trial.pt.              |
| 63. | controlled clinical trial.pt.                |
| 64. | (randomized or randomised or randomly).ti,ab |
| 65. | placebo.ti,ab.                               |
| 66. | trial.ti,ab.                                 |
| 67. | groups.ti,ab.                                |
| 68. | or/62-67                                     |
| 69. | 3 and 61 and 68                              |
| 70. | exp animals/ not humans.sh.                  |
| 71. | 69 not 70                                    |
| 72. | 71 not (comment or editorial).pt.            |



**CENTRAL**

Search on 14.01.2019, 439 trials, Update from 2018 to Current on 20.08.2020: 244 trials

|    |                                                                                                                       |
|----|-----------------------------------------------------------------------------------------------------------------------|
| 1  | Africa, explode all trees                                                                                             |
| 2  | Algeria* or Angol* or Benin* or Botswan*                                                                              |
| 3  | (Burkina Faso) or Burund* or Cameroon* or (Cape Verde) or (Central African Republic)                                  |
| 4  | Chad* or Comoros* or Cote d'Ivoire or Congo*                                                                          |
| 5  | Djibout* or Egypt* or (Equatorial Guinea*) or Eritrea*                                                                |
| 6  | Ethiop* or Gabon* or Gambia* or Ghana* or Guinea* or Guinea-Bissau                                                    |
| 7  | Kenya* or Lesoth* or Liberia* or Libya* or Madagascar* or Malawi*                                                     |
| 8  | Mali* or Mauritania* or Mauritius* or Morocc* or Mozambique* or Namibia* or Niger*                                    |
| 9  | Nigeria* or Rwanda* or (Sao Tome and Principe) or Senegal* or Seychell*                                               |
| 10 | Sierra Leone or Somalia* or (South Africa) or (South Sudan*) or Sudan* or Swasiland                                   |
| 11 | Tanzania* or Togo* or Tunisia* or Uganda* or Zambia* or Zimbabwe* or Somaliland or (Sahrawi Arab Democratic Republic) |
| 12 | #1 or #2 or #3 or #4 or #5 or #6 or #7 or #8 or #9 or #10 or #11                                                      |
| 13 | MeSH descriptor Diabetes, this term only                                                                              |
| 14 | MESH descriptor Diabetes mellitus, explode all trees                                                                  |
| 15 | Diabetes near 3 gestation*                                                                                            |
| 16 | Latent autoimmune diabetes in adults                                                                                  |
| 17 | Prediabetes                                                                                                           |
| 18 | Insulin resistan*                                                                                                     |
| 20 | HBA1C                                                                                                                 |
| 21 | Diabet* near 3 (angiopath* or foot orfeet or retinopath*)                                                             |
| 22 | Diabet* near 3 (cardiomyopathy* or coma or ketoacido* or neuropath*)                                                  |
| 23 | #13 or #14 or #15 or #16 or #17 or #18 or #19 or #20 or #21                                                           |
| 32 | #12 and #23                                                                                                           |

**CINAHL**

Search on 20.08.2020: 19 results

(Africa\$ or Africa\$ or Algeria\$ or Angol\$ or Benin\$ or Botswan\$ or (Burkina Faso) or Burund\$ or Cameroon\$ or (Cape Verde) or (Central African Republic) or Chad\$ or Comoros\$ or Cote d'Ivoire or Congo\$ Djibout\$ or Egypt\$ or (Equatorial Guinea\$) or Eritrea\$

1  
2  
3 or Ethiopia\$ or Gabon\$ or Gambia\$ or Ghana\$ or Guinea\$ or Guinea-Bissau or Kenya\$ or  
4 Lesotho\$ or Liberia\$ or Libya\$ or Madagascar\$ or Malawi\$ or Mali\$ or Mauritania\$ or  
5 Mauritius\$ or Morocco\$ or Mozambique\$ or Namibia\$ or Niger\$ or Nigeria\$ or Rwanda\$ or  
6 (Sao Tome and Principe) or Senegal\$ or Seychell\$ or Sierra Leone or Somalia\$ or (South  
7 Africa) or (South Sudan\$) or Sudan\$ or Swasiland or Tanzania\$ or Togo\$ or Tunisia\$ or  
8 Uganda\$ or Zambia\$ or Zimbabwe\$ or Somaliland or (Sahrawi Arab Democratic Republic))

9  
10  
11 in Abstract

12  
13  
14 AND

15 diabetes in Abstract

16  
17 AND

18 randomized or rct or randomized in Abstract

19  
20 AND

21 In English

22  
23 AND

24 Peer-reviewed

25  
26 And

27 Humans

28  
29  
30  
31 **International Clinical Trials Registry Platform**

32 Search on 9.-10.10.2019, update on 25.08.2020 (registration January 2019 to 31.08.2020)

33 <http://apps.who.int/trialsearch/AdvSearch.aspx>

- 34  
35  
36 1. Africa or African in the Title and diabetes or diabetic or HbA1c in the condition,  
37 Recruitment status: all: 90 records for 90 trials (9.10.2019)
- 38 2. diabetes or diabetic or HbA1c in the condition  
39 Recruitment status: all  
40 Countries of recruitment: Algeria or Angola or Benin or Botswana or Burkina Faso or  
41 Burundi or Cameroon or Central African Republic or Chad or Congo or Cite D'ivoire:  
42 96 record for 63 trials
- 43 3. diabetes or diabetic or HbA1c in the condition  
44 Recruitment status: all  
45 Countries of recruitment: Democratic Republic of Congo or Djibouti or Egypt or  
46 Equatorial Guinea or Eritrea or Ethiopia: 292 records for 159 trials
- 47 4. diabetes or diabetic or HbA1c in the condition  
48 Recruitment status: all  
49 Countries of recruitment: Gabon or Gambia or Ghana or Guinea or Guinea-Bissau or  
50 Kenya or Lesotho or Liberia or Lybia: 22 records for 22 trials
- 51 5. diabetes or diabetic or HbA1c in the condition  
52  
53  
54  
55  
56  
57  
58  
59  
60

1  
2  
3 Recruitment status: all

4 Countries of recruitment: Madagascar or Malawi or Mali or Mauritania or Mauritius or  
5 Morocco or Mozambique: 96 records for 34 trials

- 6  
7  
8 6. diabetes or diabetic or HbA1c in the condition

9 Recruitment status: all

10 Countries of recruitment: Nigeria: 13 records for 13 trials

- 11  
12  
13 7. diabetes or diabetic or HbA1c in the condition

14 Recruitment status: all

15 Countries of recruitment: Namibia or Niger or Rwanda or (Sao Tome and Principe) or  
16 Senegal or Seychelles or Sierra Leone or Somalia or South Sudan or Sudan or  
17 Swaziland:

18  
19  
20 11 records for 11 trials

- 21  
22 8. diabetes or diabetic or HbA1c in the condition

23 Recruitment status: all

24 Countries of recruitment: South Africa: 1528 records for 429 trials:

- 25  
26  
27 9. diabetes or diabetic or HbA1c in the condition

28 Recruitment status: all

29 Countries of recruitment: Togo or Tunisia or Uganda or Zambia or Zimbabwe: 129  
30 records for 50 trials  
31  
32  
33  
34  
35  
36  
37  
38  
39  
40  
41  
42  
43  
44  
45  
46  
47  
48  
49  
50  
51  
52  
53  
54  
55  
56  
57  
58  
59  
60

## African Journals Online

<https://www.ajol.info/index.php/index/search/search?query=%28diabetes+or+diabetic+or+hba1c%29+and+%28random+or+randomized+or+randomised%29&dateFromYear=2004&dateFromMonth=01&dateFromDay=1&dateToYear=2020&dateToMonth=10&dateToDay=14&autohors=>

Advanced search 14.10.2020

Titel: (diabetes or diabetic or hba1c) and (random or randomized or randomised)

30 results

## African Index Medicus Database

[http://indexmedicus.afro.who.int/aim/opac\\_css/index.php?lvl=search\\_result&get\\_query=4](http://indexmedicus.afro.who.int/aim/opac_css/index.php?lvl=search_result&get_query=4)

Advanced search 14.10.2020

Titel, Expression booléenne: (diabetes or diabetic or hba1c) and (random or randomized or randomised)

122 results, no potentially eligible references

# 1 List of included and excluded studies

## 1.1 List of included studies

### **Abaza 2017**

Abaza H, Marschollek M. SMS education for the promotion of diabetes self-management in low & middle income countries: a pilot randomized controlled trial in Egypt. *BMC public health*. 2017;17(1):962.

Abaza H, Marschollek M, Schulze M. SMS Education for the Promotion of Diabetes Self-Management in Low & Middle Income Countries: A Randomized Controlled Trial in Egypt. *Studies in Health Technology & Informatics*. 2017;245:1209.

### **Abdulrhman 2013**

Abdulrhman MM, El-Hefnawy MH, Aly RH, Shatla RH, Mamdouh RM, Mahmoud DM, et al. Metabolic effects of honey in type 1 diabetes mellitus: a randomized crossover pilot study. *Journal of Medicinal Food*. 2013;16(1):66-72.

### **Adibe 2013**

Adibe MO, Ukwe CV, Aguwa CN. The Impact of Pharmaceutical Care Intervention on the Quality of Life of Nigerian Patients Receiving Treatment for Type 2 Diabetes. *Value in Health Regional Issues*. 2013;2(2):240-7.

Adibe MO, Aguwa CN, Ukwe CV. Cost-Utility Analysis of Pharmaceutical Care Intervention Versus Usual Care in Management of Nigerian Patients with Type 2 Diabetes. *Value in Health Regional Issues*. 2013;2(2):189-98.

### **Adjei 2015**

Adjei DN, Agyemang C, Dasah JB, Kuranchie P, Amoah AG. The effect of electronic reminders on risk management among diabetic patients in low resourced settings. *Journal of Diabetes & its Complications*. 2015;29(6):818-21.

### **Ali 2019**

Ali S, Ghanem Y, Sharaki O, Hewedy W, al. e. The impact of different regimens of vitamin d3 on glucose homeostasis in type 2 diabetic patients. *Asian journal of pharmaceutical and clinical research*. 2019;12(12):21- 6.

### **Amendezo 2017**

Amendezo E, Walker Timothy D, Karamuka V, Robinson B, Kavabushi P, Ntirenganya C, et al. Effects of a lifestyle education program on glycemic control among patients with diabetes at Kigali University Hospital, Rwanda: A randomized controlled trial. *Diabetes Research & Clinical Practice*. 2017;126:129-37.

### **Anderson 2001**

1  
2  
3 Anderson RA, Roussel AM, Zouari N, Mahjoub S, Matheau JM, Kerkeni A. Potential  
4 antioxidant effects of zinc and chromium supplementation in people with type 2 diabetes  
5 mellitus. *Journal of the American College of Nutrition*. 2001;20(3):212-8.

6  
7  
8 **Anyanwu 2016**

9 Anyanwu AC, Fasanmade OA, Odeniyi IA, Iwuala S, Coker HB, Ohwovoriole AE. Effect of  
10 Vitamin D supplementation on glycemic control in Type 2 diabetes subjects in Lagos,  
11 Nigeria. *Indian Journal of Endocrinology and Metabolism*. 2016;20(2):189-94.

12  
13  
14 **Ashoush 2016**

15 Ashoush S, El-Said M, Fathi H, Abdelnaby M. Identification of metformin poor responders,  
16 requiring supplemental insulin, during randomization of metformin versus insulin for the  
17 control of gestational diabetes mellitus. *Journal of obstetrics and gynaecology research*.  
18 2016;42(6):640- 7.

19  
20  
21  
22 **Asuako 2017**

23 Asuako B, Moses MO, Eghan BA, Sarpong PA. Fasting plasma glucose and lipid profiles of  
24 diabetic patients improve with aerobic exercise training. *Ghana Medical Journal*.  
25 2017;51(3):120-7.

26  
27  
28  
29 **Beyuo 2015**

30 Beyuo T, Obed SA, Adjepong-Yamoah KK, Bugyei KA, Oppong SA, Marfoh K. Metformin  
31 versus Insulin in the Management of Pre-Gestational Diabetes Mellitus in Pregnancy and  
32 Gestational Diabetes Mellitus at the Korle Bu Teaching Hospital: A Randomized Clinical  
33 Trial. *PLoS ONE [Electronic Resource]*. 2015;10(5):e0125712.

34  
35  
36  
37 **Chraibi 2017**

38 Chraibi A, Al-Herz S, Nguyen BD, Soeatmadji DW, Shinde A, Lakshmivenkataraman B, et al.  
39 An RCT Investigating Patient-Driven Versus Physician-Driven Titration of BIAsp 30 in  
40 Patients with Type 2 Diabetes Uncontrolled Using NPH Insulin. *Diabetes Therapy Research,*  
41 *Treatment and Education of Diabetes and Related Disorders*. 2017;8(4):767-80.

42  
43  
44  
45 **Debussche 2018**

46 Debussche X, Besancon S, Balcou-Debussche M, Ferdynus C, Delisle H, Huiart L, et al.  
47 Structured peer-led diabetes self-management and support in a low-income country: The  
48 ST2EP randomised controlled trial in Mali. *PLoS ONE*. 2018;13(1):e0191262.

49  
50  
51  
52 **Distiller 2014**

53 Distiller LA, Nortje H, Wellmann H, Amod A, Lombard L. A 24-week, prospective,  
54 randomized, open-label, treat-to-target pilot study of obese type 2 diabetes patients with  
55 severe insulin resistance to assess the addition of exenatide on the efficacy of U-500 regular  
56 insulin plus metformin. *Endocrine practice*. 2014;20(11):1143- 50.

57  
58  
59  
60 **El Gayar 2019**

1  
2  
3 El Gayar MH, Aboromia MMM, Ibrahim NA, Abdel Hafiz MH. Effects of ginger powder  
4 supplementation on glycemic status and lipid profile in newly diagnosed obese patients with  
5 type 2 diabetes mellitus. *Obesity medicine*. 2019;14.

6  
7  
8 **El-Haggag 2015**

9 El-Haggag SM, Farrag WF, Kotkata FA. Effect of ketotifen in obese patients with type 2  
10 diabetes mellitus. *Journal of Diabetes & its Complications*. 2015;29(3):427-32.

11  
12  
13 **El-Makaky 2020**

14 El-Makaky Y, Shalaby HK. The effects of non-surgical periodontal therapy on glycemic  
15 control in diabetic patients: a randomized controlled trial. *Oral diseases*. 2020;26:822-9.

16  
17  
18 **El-Shamy 2018**

19 El-Shamy FF, El-Kholy SS, Labib M, Kabel AM. Ameliorative potential of acupressure on  
20 gestational diabetes mellitus: a randomized controlled trial. *Journal of complementary and*  
21 *integrative medicine*. 2018; 16(1).

22  
23  
24 **El-Sheikh 2019**

25 El-Sheikh HM, El-Haggag SM, Elbedewy TA. Comparative study to evaluate the effect of L-  
26 carnitine plus glimepiride versus glimepiride alone on insulin resistance in type 2 diabetic  
27 patients. *Diabetes and metabolic syndrome: clinical research and reviews*. 2019;13(1):167-  
28 73.

29  
30  
31  
32 **El- Sharkawy 2016**

33 El- Sharkawy HM, Anees MM, Van Dyke TE. Propolis improves periodontal status and  
34 glycemic control in patients with type 2 diabetes mellitus and chronic periodontitis: a  
35 randomized clinical trial. *Journal of periodontology*. 2016;87(12):1418-26.

36  
37  
38 **Elbarbary 2016**

39 Elbarbary NS. Effectiveness of the low-glucose suspend feature of insulin pump during  
40 fasting during Ramadan in type 1 diabetes mellitus. *Diabetes/metabolism research and*  
41 *reviews*. 2016;32(6):623- 33.

42  
43  
44 **Elbarbary 2018**

45 Elbarbary NS, Ismail EAR, El-Naggag AR, Hamouda MH, El-Hamamsy M. The effect of 12  
46 weeks carnosine supplementation on renal functional integrity and oxidative stress in  
47 pediatric patients with diabetic nephropathy: a randomized placebo-controlled trial. *Pediatric*  
48 *diabetes*. 2018;19(3):470- 7.

49  
50  
51  
52 **Elbarbary 2020**

53 Elbarbary NS, Ismail EAR, Zaki MA, Darwish YW, Ibrahim MZ, El-Hamamsy M. Vitamin B  
54 complex supplementation as a homocysteine-lowering therapy for early stage diabetic  
55 nephropathy in pediatric patients with type 1 diabetes: A randomized controlled trial. *Clinical*  
56 *Nutrition*. 2020;39(1):49-56.

57  
58  
59  
60 **Embaby 2016**

1  
2  
3 Embaby H, Elsayed E, Fawzy M. Insulin Sensitivity and Plasma Glucose Response to  
4 Aerobic Exercise in Pregnant Women at Risk for Gestational Diabetes Mellitus. Ethiopian  
5 journal of health sciences. 2016;26(5):409- 14.  
6  
7

8 **Essien 2017**

9 Essien O, Otu A, Umoh V, Enang O, Hicks JP, Walley J. Intensive Patient Education  
10 Improves Glycaemic Control in Diabetes Compared to Conventional Education: A  
11 Randomised Controlled Trial in a Nigerian Tertiary Care Hospital. PLoS ONE  
12 2017;12(1):e0168835.  
13  
14

15 **Fairall 2016**

16 Fairall LR, Folb N, Timmerman V, Lombard C, Steyn K, Bachmann MO, et al. Educational  
17 Outreach with an Integrated Clinical Tool for Nurse-Led Non-communicable Chronic Disease  
18 Management in Primary Care in South Africa: a Pragmatic Cluster Randomised Controlled  
19 Trial. Plos medicine. 2016;13(11):e1002178.  
20  
21  
22

23 **Fayehun 2018**

24 Fayehun AF, Olowookere OO, Ogunbode AM, Adetunji AA, Esan A. Walking prescription of  
25 10 000 steps per day in patients with type 2 diabetes mellitus: a randomised trial in Nigerian  
26 general practice. British Journal of General Practice. 2018;68(667):e139-e45.  
27  
28  
29

30 **Ghoneim 2013**

31 Ghoneim EM, Abd El Ghany AA. Behavior of intraocular pressure after intravitreal injection of  
32 triamcinolone acetonide among egyptians. Ophthalmology and Therapy. 2013;2(2):121-30.  
33  
34

35 **Hailu 2018**

36 Hailu FB, Hjortdahl P, Moen A. Nurse-Led Diabetes Self-Management Education Improves  
37 Clinical Parameters in Ethiopia. Frontiers in Public Health. 2018;6:302.  
38  
39

40 **Ibrahim 2014**

41 Ibrahim MI, Hamdy A, Shafik A, Taha S, Anwar M, Faris M. The role of adding metformin in  
42 insulin-resistant diabetic pregnant women: a randomized controlled trial. Archives of  
43 Gynecology & Obstetrics. 2014;289(5):959-65.  
44  
45

46 **Krawinkel 2018**

47 Krawinkel MB, Ludwig C, Swai ME, Yang RY, Chun KP, Habicht SD. Bitter melon reduces  
48 elevated fasting plasma glucose levels in an intervention study among prediabetics in  
49 Tanzania. Journal of Ethnopharmacology. 2018;216:1-7.  
50  
51

52 **Labhardt 2011**

53 Labhardt ND, Balo JR, Ndam M, Manga E, Stoll B. Improved retention rates with low-cost  
54 interventions in hypertension and diabetes management in a rural African environment of  
55 nurse-led care: a cluster-randomised trial. Tropical Medicine & International Health.  
56 2011;16(10):1276-84.  
57  
58  
59

60 **Maharaj 2016**



1  
2  
3 Maharaj SS, Nuhu JM. Rebound exercise: A beneficial adjuvant for sedentary non-insulin-  
4 dependent type 2 diabetic individuals in a rural environment. *Australian Journal of Rural*  
5 *Health*. 2016;24(2):123-9.

#### 8 **Malek 2015**

9 Malek R, Ajili F, Assaad-Khalil SH, Shinde A, Chen JW, Van den Berg E. Similar glucose  
10 control with basal-bolus regimen of insulin detemir plus insulin aspart and thrice-daily  
11 biphasic insulin aspart 30 in insulin-naive patients with type 2 diabetes: Results of a 50-week  
12 randomized clinical trial of stepwise insulin intensification. *Diabetes & Metabolism*.  
13 2015;41(3):223-30.

#### 17 **Marais 2018**

18 Marais C, Hall DR, van Wyk L, Conradie M. Randomized cross-over trial comparing the  
19 diagnosis of gestational diabetes by oral glucose tolerance test and a designed breakfast  
20 glucose profile. *International Journal of Gynaecology & Obstetrics*. 2018;141(1):85-90.

#### 23 **Malipa 2013**

24 Malipa M, Menon J. The relationship between compliance and quality of life among  
25 adolescents with diabetes mellitus type1. *Medical Journal of Zambia*. 2013;40(3):93-103.

#### 28 **Mash 2014**

29 Mash RJ, Rhode H, Zwarenstein M, Rollnick S, Lombard C, Steyn K, et al. Effectiveness of a  
30 group diabetes education programme in under-served communities in South Africa: a  
31 pragmatic cluster randomized controlled trial. *Diabetic Medicine*. 2014;31(8):987-93.

32 Mash R, Kroukamp R, Gaziano T, Levitt N. Cost-effectiveness of a diabetes group education  
33 program delivered by health promoters with a guiding style in underserved communities in  
34 Cape Town, South Africa. *Patient Education & Counseling*. 2015;98(5):622-6.

#### 39 **Matter 2020**

40 Matter RM, Elbarbary NS, Ismail EAR, Darwish YW, Nada AS, Banoub VP. Zinc  
41 supplementation improves glucose homeostasis in patients with  $\beta^2$ -thalassemia major  
42 complicated with diabetes mellitus: a randomized controlled trial. *Nutrition* 2020;73.

#### 46 **Mohamad 2009**

47 Mohamad RH, Zekry ZK, Al-Mehdar HA, Salama O, El-Shaieb SE, El-Basmy AA, et al.  
48 Camel milk as an adjuvant therapy for the treatment of type 1 diabetes: verification of a  
49 traditional ethnomedical practice. *Journal of Medicinal Food*. 2009;12(2):461-5.

#### 52 **Moustafa 2019**

53 Moustafa HAM, El Wakeel LM, Halawa MR, Sabri NA, El-Bahy AZ, Singab AN. Effect of  
54 *Nigella Sativa* oil versus metformin on glycemic control and biochemical parameters of newly  
55 diagnosed type 2 diabetes mellitus patients. *Endocrine*. 2019;65(2):286- 94.

#### 58 **Muchiri 2016**

1  
2  
3 Muchiri JW, Gericke GJ, Rheeder P. Effect of a nutrition education programme on clinical  
4 status and dietary behaviours of adults with type 2 diabetes in a resource-limited setting in  
5 South Africa: a randomised controlled trial. *Public Health Nutrition*. 2016;19(1):142-55.

6  
7 Muchiri JW, Gericke GJ, Rheeder P. Impact of nutrition education on diabetes knowledge  
8 and attitudes of adults with type 2 diabetes living in a resource-limited setting in South Africa:  
9 a randomised controlled trial. *Journal of Endocrinology, Metabolism and Diabetes of South  
10 Africa*. 2016;21(2):26-34.

#### 11 **Nteleki 2015**

12 Nteleki B, Abrahamse H, Houreld NN. Conventional podiatric intervention and phototherapy  
13 in the treatment of diabetic ulcers. *Seminars in Vascular Surgery*. 2015;28(3-4):172-83.

#### 14 **Owolabi 2019**

15 Owolabi EO, Goon DT, Ajayi AI. Efficacy, acceptability and feasibility of daily text-messaging  
16 in promoting glycaemic control and other clinical outcomes in a low-resource setting of South  
17 Africa: A randomised controlled trial. *PLoS ONE [Electronic Resource]*.  
18 2019;14(11):e0224791.

19 Owolabi EO, Goon DT, Ajayi AI. Impact of mobile phone text messaging intervention on  
20 adherence among patients with diabetes in a rural setting: A randomized controlled trial.  
21 *Medicine*. 2020;99(12):1-8.

#### 22 **Ragheb 2020**

23 Ragheb SR, El Wakeel LM, Nasr MS, Sabri NA. Impact of Rutin and Vitamin C combination  
24 on oxidative stress and glycemic control in patients with type 2 diabetes. *Clinical nutrition  
25 ESPEN*. 2020;35:128-35.

#### 26 **Rashad 2017**

27 Rashad H, Metwally FM, Ezzat SM, Salama MM, Hasheesh A, Abdel Motaal A. Randomized  
28 double-blinded pilot clinical study of the antidiabetic activity of *Balanites aegyptiaca* and  
29 UPLC-ESI-MS/MS identification of its metabolites. *Pharmaceutical Biology*. 2017;55(1):1954-  
30 61.

#### 31 **RezkAllah 2019**

32 RezkAllah SS, Takla MK. Effects of different dosages of interval training on glycemic control  
33 in people with prediabetes: a randomized controlled trial. *Diabetes spectrum*.  
34 2019;32(2):125- 31.

#### 35 **Saeed 2013**

36 Saeed AM. Combined vitrectomy and intravitreal injection versus combined laser and  
37 injection for treatment of intractable diffuse diabetic macular edema. *Clinical Ophthalmology*.  
38 2013;7:283-97.

#### 39 **Salem 2010**

1  
2  
3 Salem MA, Aboelasar MA, Elbarbary NS, Elhilaly RA, Refaat YM. Is exercise a therapeutic  
4 tool for improvement of cardiovascular risk factors in adolescents with type 1 diabetes  
5 mellitus? A randomised controlled trial. *Diabetology & metabolic syndrome*. 2010;2(1):47.

6  
7  
8 **Sodipo 2017**

9 Sodipo OO, Adedokun A, Olusola AA. Effect of self-monitoring of blood glucose on  
10 glycaemic outcome among type 2 diabetic patients. *South african family practice*.  
11 2017;59(6):208- 13.

12  
13  
14 **Somanah 2012**

15 Somanah J, Aruoma OI, Gunness TK, Kowelssur S, Dambala V, Murad F, et al. Effects of a  
16 short term supplementation of a fermented papaya preparation on biomarkers of diabetes  
17 mellitus in a randomized Mauritian population. *Preventive Medicine*. 2012;54 Suppl:S90-7.

18  
19  
20 **Steyn 2013**

21 Steyn K, Lombard C, Gwebushe N, Fourie JM, Everett-Murphy K, Zwarenstein M, et al.  
22 Implementation of national guidelines, incorporated within structured diabetes and  
23 hypertension records at primary level care in Cape Town, South Africa: a randomised  
24 controlled trial. *Glob Health Action*. 2013;6:20796.

25  
26  
27 **Takenga 2014**

28 Takenga C, Berndt RD, Musongya O, Kitero J, Katoke R, Molo K, et al. An ICT-Based  
29 Diabetes Management System Tested for Health Care Delivery in the African Context.  
30 *International Journal of Telemedicine & Applications*. 2014;2014:437307.

31  
32  
33 **Tawfik 2016**

34 Tawfik MY, Mohamed RA. The impact of communicating cardiovascular risk in type 2  
35 diabetics on patient risk perception, diabetes self-care, glycosylated hemoglobin, and  
36 cardiovascular risk. *Journal of public health*. 2016;24(2):153- 64.

37  
38  
39 **Thuita 2020**

40 Thuita AW, Kiage BN, Onyango AN, Makokha AO. Effect of a nutrition education programme  
41 on the metabolic syndrome in type 2 diabetes mellitus patients at a level 5 Hospital in Kenya:  
42 "a randomized controlled trial". *BMC Nutr*. 2020;6:30.

43  
44  
45 **Tsobgny-Tsague 2018**

46 Tsobgny-Tsague NF, Lontchi-Yimagou E, Nana ARN, Tankeu AT, Katte JC, Dehayem MY,  
47 et al. Effects of nonsurgical periodontal treatment on glycated haemoglobin on type 2  
48 diabetes patients (PARODIA 1 study): a randomized controlled trial in a sub-Saharan Africa  
49 population. *BMC Oral Health*. 2018;18(1):28.

50  
51  
52 **Utz 2018**

53 Utz B, Assarag B, Smekens T, Ennassiri H, Lekhal T, El Ansari N, et al. Detection and initial  
54 management of gestational diabetes through primary health care services in Morocco: An  
55 effectiveness-implementation trial. *PloS one*. 2018;13(12):e0209322.

**van der Hoogt 2017**

van der Hoogt M, van Dyk JC, Dolman RC, Pieters M. Protein and fat meal content increase insulin requirement in children with type 1 diabetes - Role of duration of diabetes. *Journal of clinical and translational endocrinology*. 2017;10:15- 21.

**van Rooijen 2004**

van Rooijen AJ, Rheeder P, Eales CJ, Becker PJ. Effect of exercise versus relaxation on haemoglobin A1C in Black females with type 2 diabetes mellitus. *Qjm*. 2004;97(6):343-51.

**Webb 2015**

Webb EM, Rheeder P, Van Zyl DG. Diabetes care and complications in primary care in the Tshwane district of South Africa. *Primary care diabetes*. 2015;9(2):147-54.

Webb EM, Rheeder P, Roux P. Screening in Primary Care for Diabetic Retinopathy, Maculopathy and Visual Loss in South Africa. *Ophthalmologica*. 2016;235(3):141-9.

Webb EM, Rheeder P. A cluster-randomized trial to estimate the effect of mobile screening and treatment feedback on HbA1c and diabetes-related complications in Tshwane primary health care clinics, South Africa. *Primary care diabetes*. 2017;11(6):546-54.

**Yakoot 2019**

Yakoot M, Abdelatif M, Helmy S. Efficacy of a new local limb salvage treatment for limb-threatening diabetic foot wounds-a randomized controlled study. *Diabetes, Metabolic Syndrome and Obesity: Targets and Therapy*. 2019;12:1659.

**Yan 2014**

Yan H, Prista A, Ranadive SM, Damasceno A, Caupers P, Kanaley JA, et al. Effect of Aerobic Training on Glucose Control and Blood Pressure in T2DDM East African Males. *Isrn Endocrinology Print*. 2014;2014:864897.

## 1.2 List of excluded studies

### 1.2.1 Other design (28 references)

1. Abd El Hameed AA, Shreif HE, Mowafy HE. The role of continuing metformin therapy during pregnancy in the reduction of gestational diabetes and improving pregnancy outcomes in women with polycystic ovary syndrome. *Middle east fertility society journal*. 2011;16(3):204- 8.
2. Abdelaziz TS, Sadek KM. Effect of reducing medication regimen complexity on glycaemic control in patients with diabetes. *Romanian Journal of Internal Medicine*. 2019;57(1):23-9.
3. Agboola-Abu CF, Ohwovoriole AE, Akinlade KS. The effect of oral hypoglycaemic agents on dyslipidaemia in Nigerian patients with newly diagnosed non-insulin dependent diabetes mellitus--a prospective study. *West African Journal of Medicine*. 2000;19(2):126-31.
4. Assah FK, Atanga EN, Enoru S, Sobngwi E, Mbanya JC. Community-based peer support significantly improves metabolic control in people with Type 2 diabetes in Yaounde, Cameroon. *Diabetic Medicine*. 2015;32(7):886-9.
5. Bahramikia S, Yazdanparast R. Phytochemistry and medicinal properties of *Teucrium polium* L. (Lamiaceae). *Phytotherapy Research*. 2012;26(11):1581-93.
6. Bailey CJ, Iqbal N, T'Joel C, List JF. Dapagliflozin monotherapy in drug-naive patients with diabetes: a randomized-controlled trial of low-dose range. *Diabetes, Obesity & Metabolism*. 2012;14(10):951-9.
7. Bekkouche L, Bouchenak M, Malaisse WJ, Yahia DA. The Mediterranean diet adoption improves metabolic, oxidative, and inflammatory abnormalities in Algerian metabolic syndrome patients. *Hormon- und Stoffwechselforschung / Hormones et métabolisme [Hormone and metabolic research]*. 2014;46(4):274- 82.
8. Bello SI, Ganiyu KA, Dakop YO, Erah PO. Pharmacist's intervention in the control of blood sugar levels in randomised diabetes patients at a primary health care setting in Benin City. *Nigerian Quarterly Journal of Hospital Medicine*. 2012;22(4):245-8.
9. Brown J, Martis R, Hughes B, Rowan J, Crowther CA. Oral anti-diabetic pharmacological therapies for the treatment of women with gestational diabetes. *Cochrane Database of Systematic Reviews*. 2017;1:CD011967.
10. Chou HS, Truitt KE, Moberly JB, Merante D, Choi Y, Mun Y, et al. A 26-week, placebo- and pioglitazone-controlled monotherapy study of rivoglitazone in subjects with type 2 diabetes mellitus. *Diabetes, Obesity & Metabolism*. 2012;14(11):1000-9.
11. De Caterina R, Andersson U, Alexander JH, Al-Khatib SM, Bahit MC, Goto S, et al. History of bleeding and outcomes with apixaban versus warfarin in patients with atrial fibrillation in the Apixaban for Reduction in Stroke and Other Thromboembolic Events in Atrial Fibrillation trial. *American Heart Journal*. 2016;175:175-83.

12. De Luca G, Michael Gibson C, Bellandi F, Murphy S, Maioli M, Noc M, et al. Benefits of pharmacological facilitation with glycoprotein IIb-IIIa inhibitors in diabetic patients undergoing primary angioplasty for STEMI. A subanalysis of the EGYPT cooperation. *Journal of Thrombosis & Thrombolysis*. 2009;28(3):288-98.
13. El-Fattah AAA, Hamed MI, Sadek SE, Abu-Elhana AS. Insulin resistance in type II diabetes mellitus with liver cirrhosis. *Global journal of pharmacology*. 2013;7(2):109- 17.
14. Fullerton B, Siebenhofer A, Jeitler K, Horvath K, Semlitsch T, Berghold A, et al. Short-acting insulin analogues versus regular human insulin for adults with type 1 diabetes mellitus. *Cochrane Database of Systematic Reviews*. 2016(6):CD012161.
15. Gessler N, Labhard ND, Stolt P, Manga E, Balo JR, Boffolo A, et al. The lesson of Monsieur Nouma: effects of a culturally sensitive communication tool to improve health-seeking behavior in rural Cameroon. *Patient Education & Counseling*. 2012;87(3):343-50.
16. Ibrahim MA, Sarhan, II, Halawa MR, Afify EN, Hebah HA, Al-Gohary EA, et al. Study of the effect of vitamin D supplementation on glycemic control in type 2 diabetic prevalent hemodialysis patients. *Hemodialysis international*. 2015;19:S11- S9.
17. Jingi AM, Noubiap JJ, Essouma M, Bigna JJ, Nansseu JR, Ellong A, et al. Association of insulin treatment versus oral hypoglycaemic agents with diabetic retinopathy and its severity in type 2 diabetes patients in Cameroon, sub-Saharan Africa. *Annals of Translational Medicine*. 2016;4(20):395.
18. Kadiri A, Al-Nakhi A, El-Ghazali S, Jabbar A, Al Arouj M, Akram J, et al. Treatment of type 1 diabetes with insulin lispro during Ramadan. *Diabetes & metabolism*. 2001;27(4 Pt 1):482- 6.
19. Kamau RK, Maina FW, Kigundu C, Mati JK. The effect of low-oestrogen combined pill, progestogen-only pill and medroxyprogesterone acetate on oral glucose tolerance test. *East African Medical Journal*. 1990;67(8):550-5.
20. Moghazy AM, Shams ME, Adly OA, Abbas AH, El-Badawy MA, Elsakka DM, et al. The clinical and cost effectiveness of bee honey dressing in the treatment of diabetic foot ulcers. *Diabetes Research & Clinical Practice*. 2010;89(3):276-81.
21. Notelovitz M. Sulphonylurea therapy in the treatment of the pregnant diabetic. *South African Medical Journal Suid-Afrikaanse Tydskrif Vir Geneeskunde*. 1971;45(9):226-9.
22. Osman H, Khamis O, Elfeky M, El Amin Ali A, Abdelwahed M. Effect of short-term erythropoietin therapy on insulin resistance and serum levels of leptin and neuropeptide y in hemodialysis patients. *Indian journal of endocrinology and metabolism*. 2017;21(5):724- 30.
23. Razak A, Isaacs AA. Implementation and evaluation of a weight-reduction programme for diabetic patients at a primary health care facility in the western cape: a pilot study. *South african family practice*. 2017;59(6):189- 94.

- 1  
2  
3 24. Schumm-Draeger PM, Burgess L, Koranyi L, Hrubá V, Hamer-Maansson JE, de Bruin  
4 TW. Twice-daily dapagliflozin co-administered with metformin in type 2 diabetes: a 16-week  
5 randomized, placebo-controlled clinical trial. *Diabetes, Obesity & Metabolism*. 2015;17(1):42-  
6 51.  
7  
8  
9 25. Speechly DP, Buffenstein R. Appetite dysfunction in obese males: evidence for role of  
10 hyperinsulinaemia in passive overconsumption with a high fat diet. *European journal of*  
11 *clinical nutrition*. 2000;54(3):225- 33.  
12  
13 26. Todowede OO, Sartorius B. Prevalence of metabolic syndrome, discrete or comorbid  
14 diabetes and hypertension in sub-Saharan Africa among people living with HIV versus HIV-  
15 negative populations: a systematic review and meta-analysis protocol. *BMJ Open*.  
16 2017;7(7):e016602.  
17  
18 27. Van Olmen J, Van Pelt M, Malombo B, Ku GM, Kanda D, Heang H, et al. Process  
19 evaluation of a mobile health intervention for people with diabetes in low income countries -  
20 the implementation of the TEXT4DSM study. *Journal of Telemedicine & Telecare*.  
21 2017;23(1):96-105.  
22  
23 28. Werfalli M, Raubenheimer P, Engel M, Peer N, Kalula S, Kengne AP, et al.  
24 Effectiveness of community-based peer-led diabetes self-management programmes (COMP-  
25 DSMP) for improving clinical outcomes and quality of life of adults with diabetes in primary  
26 care settings in low and middle-income countries (LMIC): a systematic review and meta-  
27 analysis. *BMJ Open*. 2015;5(7):e007635.  
28  
29  
30  
31  
32  
33  
34

### 35 **1.2.2 Other population (32 references)**

- 36 1. Ali Hassan H, El-Gezeiry D, Nafaa TM, Baghdady I. Improved responsiveness of  
37 PCOS patients to clomiphene after CYP17a inhibitor. *Journal of assisted reproduction and*  
38 *genetics*. 2001;18(11):608- 11.  
39  
40 2. Amador-Licona N, Guízar-Mendoza J, Vargas E, Sánchez-Camargo G, Zamora-Mata  
41 L. The short-term effect of a switch from glibenclamide to metformin on blood pressure and  
42 microalbuminuria in patients with type 2 diabetes mellitus. *Archives of medical research*.  
43 2000;31(6):571- 5.  
44  
45 3. Ashoush S, Abou-Gamrah A, Bayoumy H, Othman N. Chromium picolinate reduces  
46 insulin resistance in polycystic ovary syndrome: randomized controlled trial. *Journal of*  
47 *obstetrics and gynaecology research*. 2016;42(3):279- 85.  
48  
49 4. Ashtary-Larky D, Ghanavati M, Lamuchi-Deli N, Payami SA, Alavi-Rad S,  
50 Boustaninejad M, et al. Rapid Weight Loss vs. slow weight loss: which is more effective on  
51 body composition and metabolic risk factors? *International journal of endocrinology and*  
52 *metabolism*. 2017;15(3) (no pagination).  
53  
54  
55  
56  
57  
58  
59  
60

- 1  
2  
3 5. 6. Bashandy GMN, Boules NS, Taha FM. Effects of a single preoperative dose of  
4 N(2)-L-alanyl-L-glutamine on insulin resistance and plasma glutathione levels in the early  
5 postoperative period. *Egyptian journal of anaesthesia*. 2013;29(4):319- 24.
- 6  
7 6. Bays HE, Evans JL, Maki KC, Evans M, Maquet V, Cooper R, et al. Chitin-glucan  
8 fiber effects on oxidized low-density lipoprotein: a randomized controlled trial. *European*  
9 *Journal of Clinical Nutrition*. 2013;67(1):2-7.
- 10  
11 7. Belinova L, Kahleova H, Malinska H, Topolcan O, Windrichova J, Oliyarnyk O, et al.  
12 The effect of meal frequency in a reduced-energy regimen on the gastrointestinal and  
13 appetite hormones in patients with type 2 diabetes: a randomised crossover study. *Plos one*.  
14 2017;12(4):e0174820.
- 15  
16 8. Campbell-Tofte JI, Mølgaard P, Josefsen K, Abdallah Z, Hansen SH, Cornett C, et al.  
17 Randomized and double-blinded pilot clinical study of the safety and anti-diabetic efficacy of  
18 the Rauwolfia-Citrus tea, as used in Nigerian traditional medicine. *Journal of*  
19 *ethnopharmacology*. 2011;133(2):402- 11.10.
- 20  
21 9. El-Haggag SM, Mostafa TM. Comparative clinical study between the effect of  
22 fenofibrate alone and its combination with pentoxifylline on biochemical parameters and liver  
23 stiffness in patients with non-alcoholic fatty liver disease. *Hepatology international*.  
24 2015;9(3):471- 9.
- 25  
26 10. Gupta V, Keshari BB, Tiwari SK, Murthy K. A comparative study of Shilajatu and  
27 Asanadi Ghana Vati in the management of Madhumeha w.s.r. to type-2 diabetes mellitus.  
28 *Ayu*. 2016;37(2):120-4.
- 29  
30 11. Hashim HA, Lakany NE, Sherief L. Combined metformin and clomiphene citrate  
31 versus laparoscopic ovarian diathermy for ovulation induction in clomiphene-resistant women  
32 with polycystic ovary syndrome: a randomized controlled trial. *Journal of obstetrics and*  
33 *gynaecology research*. 2011;37(3):169- 77.
- 34  
35 12. Home PD, Bolli GB, Mathieu C, Deerochanawong C, Landgraf W, Candelas C, et al.  
36 Modulation of insulin dose titration using a hypoglycaemia-sensitive algorithm: insulin  
37 glargine versus neutral protamine Hagedorn insulin in insulin-naive people with type 2  
38 diabetes. *Diabetes, Obesity & Metabolism*. 2015;17(1):15-22.
- 39  
40 13. Ismail NA, Ragab S, Abd El Baky ANE, Hamed M, Ibrahim ASA. Effect of oral  
41 curcumin administration on insulin resistance, serum resistin and fetuin-A in obese children:  
42 randomized placebo-controlled study. *Research journal of pharmaceutical, biological and*  
43 *chemical sciences*. 2014;5(1):887- 96.
- 44  
45 14. Kumari J, Mehta CS, Shukla VD, Dave AR, Shingala TM. A comparative clinical study  
46 of Nyagrodhadi Ghanavati and Virechana Karma in the management of Madhumeha. *Ayu*.  
47 2010;31(3):300-4.
- 48  
49  
50  
51  
52  
53  
54  
55  
56  
57  
58  
59  
60



15. Malin SK, Hinnerichs KR, Echtenkamp BG, Evetovich TK, Engebretsen BJ. Effect of adiposity on insulin action after acute and chronic resistance exercise in non-diabetic women. *European journal of applied physiology*. 2013;113(12):2933- 41.
16. Malin SK, Kullman EL, Scelsi AR, Haus JM, Filion J, Pagadala MR, et al. A whole-grain diet reduces peripheral insulin resistance and improves glucose kinetics in obese adults: a randomized-controlled trial. *Metabolism: clinical and experimental*. 2018;82:111- 7.
17. Malin SK, Niemi N, Solomon TP, Haus JM, Kelly KR, Filion J, et al. Exercise training with weight loss and either a high- or low-glycemic index diet reduces metabolic syndrome severity in older adults. *Annals of nutrition & metabolism*. 2012;61(2):135- 41.
18. Manaf A, Tjandrawinata RR, Malinda D. Insulin sensitizer in prediabetes: a clinical study with DLBS3233, a combined bioactive fraction of *Cinnamomum burmanii* and *Lagerstroemia speciosa*. *Drug design, development and therapy*. 2016;10:1279- 89.
19. Mendez-Del Villar M, Gonzalez-Ortiz M, Martinez-Abundis E, Perez-Rubio KG, Cortez-Navarrete M. Effect of *Irvingia gabonensis* on Metabolic Syndrome, Insulin Sensitivity, and Insulin Secretion. *Journal of Medicinal Food*. 2018;21(6):568-74.
20. Mogharnasi M, TaheriChadorneshin H, Papoli-Baravati SA, Teymuri A. Effects of upper-body resistance exercise training on serum nesfatin-1 level, insulin resistance, and body composition in obese paraplegic men. *Disability and health journal*. 2018;(no pagination).
21. Nadkarni MA, Vyas SN, Baghel MS, Ravishankar B. Randomized placebo-controlled trial of Mustadi Ghanavati in hyperlipidemia. *Ayu*. 2010;31(3):287-93.
22. Ngo-Matip ME, Pieme CA, Azabji-Kenfack M, Biapa PC, Germaine N, Heike E, et al. Effects of *Spirulina platensis* supplementation on lipid profile in HIV-infected antiretroviral naïve patients in Yaounde-Cameroon: a randomized trial study. *Lipids in health and disease*. 2014;13:191.
23. Ngondi JL, Etoundi BC, Nyangono CB, Mbofung CM, Oben JE. IGOB131, a novel seed extract of the West African plant *Irvingia gabonensis*, significantly reduces body weight and improves metabolic parameters in overweight humans in a randomized double-blind placebo controlled investigation. *Lipids in health and disease*. 2009;8:7.
24. Philis-Tsimikas A, Del Prato S, Satman I, Bhargava A, Dharmalingam M, Skjoth TV, et al. Effect of insulin degludec versus sitagliptin in patients with type 2 diabetes uncontrolled on oral antidiabetic agents. *Diabetes, Obesity & Metabolism*. 2013;15(8):760-6.
25. Pieber TR, Treichel HC, Hompesch B, Philotheou A, Mordhorst L, Gall MA, et al. Comparison of insulin detemir and insulin glargine in subjects with Type 1 diabetes using intensive insulin therapy. *Diabetic Medicine*. 2007;24(6):635-42.

- 1  
2  
3 26. Rizk AY, Bedaiwy MA, Al-Inany HG. N-acetyl-cysteine is a novel adjuvant to  
4 clomiphene citrate in clomiphene citrate-resistant patients with polycystic ovary syndrome.  
5 *Fertility and sterility*. 2005;83(2):367- 70.  
6  
7 27. Rost NS, Giugliano RP, Ruff CT, Murphy SA, Crompton AE, Norden AD, et al.  
8 *Outcomes With Edoxaban Versus Warfarin in Patients With Previous Cerebrovascular*  
9 *Events: Findings From ENGAGE AF-TIMI 48 (Effective Anticoagulation With Factor Xa Next*  
10 *Generation in Atrial Fibrillation-Thrombolysis in Myocardial Infarction 48)*. *Stroke*.  
11 2016;47(8):2075-82.  
12  
13 28. Shabana W, Teleb M, Dawod T, Abu Taha H, Abdulla A, Shahin A, et al. Outcome of  
14 alpha-blockers, with or without methylprednisolone combination, in medical expulsive therapy  
15 for lower ureteric stones: a prospective randomised study. *Arab journal of urology*.  
16 2016;14(1):7- 11.  
17  
18 29. Strojek K, Yoon KH, Hrubá V, Sugg J, Langkilde AM, Parikh S. Dapagliflozin Added  
19 to Glimpiride in Patients with Type 2 Diabetes Mellitus Sustains Glycemic Control and  
20 Weight Loss Over 48 Weeks: a Randomized, Double-Blind, Parallel-Group, Placebo-  
21 Controlled Trial. *Diabetes therapy*. 2014;5(1):267- 83.  
22  
23 30. Timmers S, De Ligt M, Phielix E, Van De Weijer T, Hansen J, Moonen-Kornips E, et  
24 al. Resveratrol as add-on therapy in subjects with well-controlled type 2 diabetes: a  
25 randomized controlled trial. *Diabetes care*. 2016;39(12):2211- 7.  
26  
27 31. Van Olmen J, Kegels G, Korachais C, de Man J, Van Acker K, Kalobu JC, et al. The  
28 effect of text message support on diabetes self-management in developing countries - A  
29 randomised trial. *Journal of Clinical & Translational Endocrinology*. 2017;7:33-41.  
30  
31 32. Vázquez C, Botella-Carretero JI, Corella D, Fiol M, Lage M, Lurbe E, et al. White fish  
32 reduces cardiovascular risk factors in patients with metabolic syndrome: the WISH-CARE  
33 study, a multicenter randomized clinical trial. *Nutrition, metabolism, and cardiovascular*  
34 *diseases : NMCD*. 2014;24(3):328- 35.

### 1.2.3 Other intervention (8 references)

- 35  
36  
37  
38  
39  
40  
41  
42  
43  
44  
45 1. Babiker R, Elmusharaf K, Keogh MB, Saeed AM. Effect of Gum Arabic (Acacia  
46 Senegal) supplementation on visceral adiposity index (VAI) and blood pressure in patients  
47 with type 2 diabetes mellitus as indicators of cardiovascular disease (CVD): a randomized  
48 and placebo-controlled clinical trial. *Lipids in Health & Disease*. 2018;17(1):56.  
49  
50 2. Dirajlal-Fargo S, Musiime V, Cook A, Mirembe G, Kenny J, Jiang Y, et al. Insulin  
51 Resistance and Markers of Inflammation in HIV-infected Ugandan Children in the CHAPAS-3  
52 Trial. *Pediatric infectious disease journal*. 2017;36(8):761- 7.  
53  
54 3. Djoumessi RN, Noubiap JJ, Kaze FF, Essouma M, Menanga AP, Kengne AP, et al.  
55 Effect of low-dose spironolactone on resistant hypertension in type 2 diabetes mellitus: a  
56  
57  
58  
59  
60

1  
2  
3 randomized controlled trial in a sub-Saharan African population. BMC Research Notes.  
4 2016;9:187.

5  
6 4. Elnashar A, Fahmy M, Mansour A, Ibrahim K. N-acetyl cysteine vs. metformin in  
7 treatment of clomiphene citrate-resistant polycystic ovary syndrome: a prospective  
8 randomized controlled study. Fertility and sterility. 2007;88(2):406- 9.

9  
10 5. Elseddek M-EA, Elgindy E. Comparison between two clomiphene citrate protocols for  
11 induction of ovulation in clomiphene resistant polycystic ovary syndrome. Middle east fertility  
12 society journal. 2014;19(4):243- 7.

13  
14 6. Gopalan A, Paramanund J, Shaw PA, Patel D, Friedman J, Brophy C, et al.  
15 Randomised controlled trial of alternative messages to increase enrolment in a healthy food  
16 programme among individuals with diabetes. BMJ Open. 2016;6(11):e012009.

17  
18 7. Onyechi KC, Eseadi C, Okere AU, Onuigbo LN, Umoke PC, Anyaegbunam NJ, et al.  
19 Effects of cognitive behavioral coaching on depressive symptoms in a sample of type 2  
20 diabetic inpatients in Nigeria. Medicine. 2016;95(31):e4444.

21  
22 8. Shehata M, Hamza M. Impact of high loading dose of atorvastatin in diabetic patients  
23 with renal dysfunction undergoing elective percutaneous coronary intervention: a randomized  
24 controlled trial. Cardiovascular therapeutics. 2015;33(2):35-41.

#### 25 **1.2.4 Other comparison (1 reference)**

26  
27 1. Ahmed ME, Mohammed MS, Mahadi SI. Primary wound closure of diabetic foot  
28 ulcers by debridement and stitching. Journal of Wound Care. 2016;25(11):650-4.

#### 29 **1.2.5 Other outcome (7 references)**

30  
31 1. Belkhadir J, el Ghomari H, Klocker N, Mikou A, Nasciri M, Sabri M. Muslims with non-  
32 insulin dependent diabetes fasting during Ramadan: treatment with glibenclamide. BMJ.  
33 1993;307(6899):292-5.

34  
35 2. El-Tamalawy MM, Ibrahim OM, Hassan TM, El-Barbari AA. Effect of Combination  
36 Therapy of Ezetimibe and Atorvastatin on Remnant Lipoprotein Versus Double Atorvastatin  
37 Dose in Egyptian Diabetic Patients. Journal of Clinical Pharmacology. 2018;58(1):34-41.

38  
39 3. Hassanien M, Elawamy A, Kamel EZ, Khalifa WA, Abolfadl GM, Roushdy ASI, et al.  
40 Perineural Platelet-Rich Plasma for Diabetic Neuropathic Pain, Could It Make a Difference?  
41 Pain Medicine. 2020;21(4):757-65.

42  
43 4. Lakhdar N, Denguezli M, Zaouali M, Zbidi A, Tabka Z, Bouassida A. Diet and diet  
44 combined with chronic aerobic exercise decreases body fat mass and alters plasma and  
45 adipose tissue inflammatory markers in obese women. Inflammation. 2013;36(6):1239- 47.

46  
47 5. Marais C, Hall DR, van Wyk L, Conradie M. Randomized cross-over trial comparing  
48 the diagnosis of gestational diabetes by oral glucose tolerance test and a designed breakfast  
49 glucose profile. International Journal of Gynaecology & Obstetrics. 2018;141(1):85-90.  
50  
51  
52  
53  
54  
55  
56  
57  
58  
59  
60

1  
2  
3 6. Saied GM, Kamel RM, Labib AM, Said MT, Mohamed AZ. The diabetic foot and leg:  
4 combined He-Ne and infrared low-intensity lasers improve skin blood perfusion and prevent  
5 potential complications. A prospective study on 30 Egyptian patients. *Lasers in Medical*  
6 *Science*. 2011;26(5):627-32.

7  
8  
9 7. Tawfik MY. The Impact of Health Education Intervention for Prevention and Early  
10 Detection of Type 2 Diabetes in Women with Gestational Diabetes. *Journal of Community*  
11 *Health*. 2017;42(3):500-10.

## 14 1.2.6

### 15 1.2.7 Other publications (41 references)

16  
17 1. Agbozo F, Abubakari A, Narh C, Jahn A. Are we missing pregnant women with  
18 gestational diabetes? Evidence from a diagnostic accuracy study comparing glycosuria,  
19 glycated haemoglobin, random and fasting glucose to oral glucose tolerance test. *Tropical*  
20 *medicine and international health Conference: 10th european congress on tropical medicine*  
21 *and international health Belgium*. 2017;22(Supplement 1):351- 2.

22  
23 2. Anyanwu AC, Fasanmade OA, Coker HB, Ohwovoriole AE. Vitamin D  
24 supplementation improves glycaemia in Vitamin D deficient nigerians with diabetes mellitus.  
25 *Endocrine reviews Conference: 96th annual meeting and expo of the endocrine society,*  
26 *ENDO 2014 Chicago, IL united states Conference start: 20140621 Conference end:*  
27 *20140624 Conference publication: (varpagings)*. 2014;35(no pagination).

28  
29 3. Aronson R, Cohen O, Conget I, Runzis S, Castaneda J, de Portu S, et al. OpT2mise:  
30 a randomized controlled trial to compare insulin pump therapy with multiple daily injections in  
31 the treatment of type 2 diabetes-research design and methods. *Diabetes Technology &*  
32 *Therapeutics*. 2014;16(7):414-20.

33  
34 4. Azar ST, Ehtay A, Wan Bebakar WM, Alaraj S, Berrah A, Omar M, et al. Efficacy and  
35 safety of liraglutide versus sulfonylurea both in combination with metformin during ramadan  
36 in subjects with type 2 diabetes (lira-ramadan): a randomized trial. *Journal of endocrinology,*  
37 *metabolism and diabetes of south africa Conference: 51st congress of the society for*  
38 *endocrinology, metabolism and diabetes of south africa, SEMDSA 2016 South africa.*  
39 *2016;21(1):14.*

40  
41 5. Balde N, Camara A, Sobngwi-Tambekou J, Balti EV, Tchatchoua A, Fezeu L, et al.  
42 Improving access to HbA1c in sub-Saharan Africa (IA3) cohort: cohort profile. *The Pan*  
43 *African Medical Journal*. 2017;27.

44  
45 6. Chi CT. A Multicenter, randomized, double-blind, positive controlled clinical study to  
46 assess the efficacy and safety of Acetyl L-Carnitine in the treatment of diabetic peripheral  
47 neuropathy. *Chictr*. 2008.

- 1  
2  
3 7. Elnashar A, El Maghraby H, Nafee T, Guiziry D, Fourtia I. Randomized controlled trial  
4 of the effects of metformin versus combined oral contraceptives in adolescent PCOS women  
5 through a 24 months follow up period. *Human reproduction*. 2015;30:i5.
- 6  
7 8. Evans JL, Bays H, Maki KC, Evans M, Maquet V, Cooper R, et al. Chitin-glucan fiber  
8 effects on oxidized low-density lipoprotein: a randomized controlled trial. *Circulation*.  
9 2012;125(10 SUPPL. 1).
- 10  
11 9. Goedecke JH, Mendham AE, Clamp L, Nono Nankam PA, Fortuin-de Smidt MC, Phiri  
12 L, et al. An Exercise Intervention to Unravel the Mechanisms Underlying Insulin Resistance  
13 in a Cohort of Black South African Women: Protocol for a Randomized Controlled Trial and  
14 Baseline Characteristics of Participants. *JMIR Research Protocols*. 2018;7(4):e75.
- 15  
16 10. Lanasri N, Nibouche NW, Atif L, Makhoul L, Zeraouia F, Hansal F, et al. Comparison  
17 of two therapeutic education methods in diabetic patients: a randomised controlled trial.  
18 *Diabetologia Conference: 54th annual meeting of the european association for the study*  
19 *diabetes, EASD 2018 Germany*. 2018;61(Supplement 1):S433.
- 20  
21 11. Malin SK, Louis-Kullman E, Scelsi AR, Haus JM, Filion J, Godin JP, et al. Whole grain  
22 diet improves glucose tolerance, insulin sensitivity, and beta-cell function in overweight  
23 prediabetic adults. *Diabetes*. 2014;63:A78.
- 24  
25 12. Malin SK, Samat A, Wolski K, Abood B, Pothier C, Bhatt DL, et al. Gastric bypass  
26 surgery enhances ghrelin suppression and improves beta-cell function and central obesity at  
27 24 months in moderately obese adults with type 2 diabetes. *Diabetes*. 2013;62:A729.
- 28  
29 13. Mash B, Levitt N, Steyn K, Zwarenstein M, Rollnick S. Effectiveness of a group  
30 diabetes education programme in underserved communities in South Africa: pragmatic  
31 cluster randomized control trial. *BMC Family Practice*. 2012;13:126.
- 32  
33 14. Mwangi N, Bascaran C, Ng'ang'a M, Ramke J, Kipturgo M, Gichuhi S, et al. Feasibility  
34 of a cluster randomized controlled trial on the effectiveness of peer-led health education  
35 interventions to increase uptake of retinal examination for diabetic retinopathy in Kirinyaga,  
36 Kenya: a pilot trial. *Pilot feasibility stud*. 2020;6:102.
- 37  
38 15. Mwangi N, Bascaran C, Ramke J, Kipturgo M, Kim M, Ng'ang'a M, et al. Peer-support  
39 to increase uptake of screening for diabetic retinopathy: process evaluation of the DURE  
40 cluster randomized trial. *Tropical Medicine & Health*. 2020;48:1.
- 41  
42 16. Mwangi N, Ng'ang'a M, Gakuo E, Gichuhi S, Macleod D, Moorman C, et al.  
43 Effectiveness of peer support to increase uptake of retinal examination for diabetic  
44 retinopathy: study protocol for the DURE pragmatic cluster randomized clinical trial in  
45 Kirinyaga, Kenya. *BMC Public Health*. 2018;18(1):871.
- 46  
47 17. Nassar WF, El-Ansary M, Shehab T, Abdelhameed M, Saad A, Esa W, et al. Effect of  
48 cell-free mesenchymal stem cells microvesicles (MVS) and exosomes therapy on beta-cell  
49 mass in type 1 diabetes mellitus (T1DM). *Diabetes*. 2015;64:A282.
- 50  
51  
52  
53  
54  
55  
56  
57  
58  
59  
60

18. Nct. The Efficacy of Specialist Collaboration and Mobile Screening for Improving the Management of Diabetes. <https://clinicaltrials.gov/show/nct01275040>. 2010.
19. Nct. Trial on an Educative Structured Intervention by Peer Educators to Improve HbA1c of Patients With Type 2 Diabetes in the Sikasso Region in Mali. <https://clinicaltrials.gov/show/nct01153048>. 2010.
20. Nct. Propolis Improves Glycemic Control in Subjects With Type 2 Diabetes and Chronic Periodontitis. <https://clinicaltrials.gov/show/nct02794506>. 2016.
21. Nct. Community- and mHealth-Based Integrated Management of Diabetes in Primary Healthcare in Rwanda. <https://clinicaltrials.gov/show/nct03376607>. 2017.
22. Nct. Nutrition Education Intervention for Adults With Type 2 Diabetes. <https://clinicaltrials.gov/show/nct03334773>. 2017.
23. Nct. Helium-Neon Laser Therapy Versus Infrared Laser Therapy in Treating Patients With Diabetic Foot Ulcer. <https://clinicaltrials.gov/show/nct03338517>. 2017.
24. Nct. Diabetes Self-Management Education (DSME) and Its Effect on Clinical, Psychosocial, and Behavioral Outcomes. <https://clinicaltrials.gov/show/nct03185689>. 2017.
25. Noakes TD. The Women's health initiative randomized controlled dietary modification trial: an inconvenient finding and the diet-heart hypothesis. *South african medical journal*. 2013;103(11):824- 5.
26. Orchard TJ, Sibomana L, Miller R. Evaluation of differing type 1 diabetes treatment regimens in youth in Rwanda. *Pediatric diabetes*. 2014;15:25- 6.
27. Pengpid S, Peltzer K, Skaal L. Efficacy of a church-based lifestyle intervention programme to control high normal blood pressure and/or high normal blood glucose in church members: a randomized controlled trial in Pretoria, South Africa. *BMC Public Health*. 2014;14:568.
28. Rockers PC, Wirtz VJ, Vian T, Onyango MA, Ashigbie PG, Laing R. Study protocol for a cluster-randomised controlled trial of an NCD access to medicines initiative: evaluation of Novartis Access in Kenya. *BMJ Open*. 2016;6(11):e013386.
29. Ross SM. African mango (IGOB131): a proprietary seed extract of *Irvingia gabonensis* is found to be effective in reducing body weight and improving metabolic parameters in overweight humans. *Holistic nursing practice*. 2011;25(4):215- 7.
30. Salman SA, Farghaly TA, Attallah DA, Abdel-Hafeez HA, Shaaban OM. Insulin sensitizing agent (metformin) improves clinical pregnancy rate in clomiphene citrate resistant polycystic ovarian syndrome patients with acanthosis nigricans. *Fertility and sterility*. 2014;102(3 SUPPL. 1):e139.
31. Samir Elbarbary N, Abdel Rahman Ismail E, El-Naggar AR, Hany Hamouda M, El-Hamamsy M. Role of carnosine as an adjuvant therapy for diabetic nephropathy in children and adolescents with type 1 diabetes: relation to oxidative stress, renal functional integrity

1  
2  
3 and glycaemic control. Pediatric diabetes Conference: 43rd annual meeting of the  
4 international society for pediatric and adolescent diabetes , ISPAD 2017 Austria.  
5 2017;18(Supplement 25):115.  
6

7  
8 32. Sherif EM, El Tonbary KY, Abd Aziz MM. Comparative study between the use of  
9 insulin glargine and intermediate acting insulin (NPH) in type 1 diabetic children less than  
10 eight years old. *Pediatric diabetes*. 2014;15:46.  
11

12 33. Sibomana L, Rwabufigiri B, Kaberuka V, Gishoma C, Rubanzana W, Miller RG, et al.  
13 Type 1 diabetes-related quality of life in Rwanda. *Diabetes*. 2015;64:A368.  
14

15 34. Utz B, Assarag B, Essolbi A, Barkat A, El Ansari N, Fakhir B, et al. Improving  
16 detection and initial management of gestational diabetes through the primary level of care in  
17 Morocco: protocol for a cluster randomized controlled trial. *Reproductive Health*.  
18 2017;14(1):75.  
19

20 35. van Olmen J, Ku GM, van Pelt M, Kalobu JC, Hen H, Darras C, et al. The  
21 effectiveness of text messages support for diabetes self-management: protocol of the  
22 TEXT4DSM study in the democratic Republic of Congo, Cambodia and the Philippines. *BMC*  
23 *Public Health*. 2013;13:423.  
24

25 36. Vedanthan R, Kamano JH, Lee H, Andama B, Bloomfield GS, DeLong AK, et al.  
26 Bridging Income Generation with Group Integrated Care for cardiovascular risk reduction:  
27 rationale and design of the BIGPIC study. *American heart journal*. 2017;188:175- 85.  
28

29 37. Veleba J, Janovska P, Kuda O, Horakova O, Malinska H, Kazdova L, et al. Combined  
30 intervention with pioglitazone and N-3 fatty acids in metformin-treated diabetic patients.  
31 *Obesity facts*. 2015;8:213.  
32

33 38. Viviers C, Van Rooijen AJ. Daily physical activity and diet intervention for individuals  
34 with type 2 diabetes mellitus: a randomised controlled trial. *South african journal of clinical*  
35 *nutrition*. 2010;23(3 SUPPL. 2):S35.  
36

37 39. Wargny M, Kleinebreil L, Diop SN, Ndour-Mbaye M, Ba Diop M, Balkau B, et al. SMS-  
38 based intervention in type 2 diabetes: clinical trial in Senegal. *BMJ innovations*. 2018.  
39

40 40. Zeghari L, Aboussaleh Y. Comparison of two approaches of nutritional education in  
41 the management of diabetes. *Annals of nutrition and metabolism Conference: 21st*  
42 *international congress of nutrition, ICN 2017 Argentina*. 2017;71(Supplement 2):903- 4.  
43

44 41. Zennaki A, Niar S, Naceur M, Aichaoui H, Ouzzaa K, Aoui A, et al. Effect of  
45 paramedical treatment codified on balance, quality of life and knowledge of teenagers  
46 suffering from T1DM persisting imbalance. *Pediatric diabetes ( varpagings)*. 2015;16:89.  
47  
48  
49  
50  
51  
52  
53  
54  
55  
56  
57  
58  
59  
60

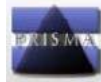

## PRISMA 2020 Checklist

1  
2  
3  
4  
5  
6  
7  
8  
9  
10  
11  
12  
13  
14  
15  
16  
17  
18  
19  
20  
21  
22  
23  
24  
25  
26  
27  
28  
29  
30  
31  
32  
33  
34  
35  
36  
37  
38  
39  
40  
41  
42  
43  
44  
45  
46  
47

| Section and Topic             | Item # | Checklist item                                                                                                                                                                                                                                                                                       | Location where item is reported        |
|-------------------------------|--------|------------------------------------------------------------------------------------------------------------------------------------------------------------------------------------------------------------------------------------------------------------------------------------------------------|----------------------------------------|
| <b>TITLE</b>                  |        |                                                                                                                                                                                                                                                                                                      |                                        |
| Title                         | 1      | Identify the report as a systematic review.                                                                                                                                                                                                                                                          | 1 (Numbers are manuscript pages)       |
| <b>ABSTRACT</b>               |        |                                                                                                                                                                                                                                                                                                      |                                        |
| Abstract                      | 2      | See the PRISMA 2020 for Abstracts checklist.                                                                                                                                                                                                                                                         | 2                                      |
| <b>INTRODUCTION</b>           |        |                                                                                                                                                                                                                                                                                                      |                                        |
| Rationale                     | 3      | Describe the rationale for the review in the context of existing knowledge.                                                                                                                                                                                                                          | 4                                      |
| Objectives                    | 4      | Provide an explicit statement of the objective(s) or question(s) the review addresses.                                                                                                                                                                                                               | 5                                      |
| <b>METHODS</b>                |        |                                                                                                                                                                                                                                                                                                      |                                        |
| Eligibility criteria          | 5      | Specify the inclusion and exclusion criteria for the review and how studies were grouped for the syntheses.                                                                                                                                                                                          | 5                                      |
| Information sources           | 6      | Specify all databases, registers, websites, organisations, reference lists and other sources searched or consulted to identify studies. Specify the date when each source was last searched or consulted.                                                                                            | 6                                      |
| Search strategy               | 7      | Present the full search strategies for all databases, registers and websites, including any filters and limits used.                                                                                                                                                                                 | Supplementary data                     |
| Selection process             | 8      | Specify the methods used to decide whether a study met the inclusion criteria of the review, including how many reviewers screened each record and each report retrieved, whether they worked independently, and if applicable, details of automation tools used in the process.                     | 6                                      |
| Data collection process       | 9      | Specify the methods used to collect data from reports, including how many reviewers collected data from each report, whether they worked independently, any processes for obtaining or confirming data from study investigators, and if applicable, details of automation tools used in the process. | 6-7                                    |
| Data items                    | 10a    | List and define all outcomes for which data were sought. Specify whether all results that were compatible with each outcome domain in each study were sought (e.g. for all measures, time points, analyses), and if not, the methods used to decide which results to collect.                        | 6                                      |
|                               | 10b    | List and define all other variables for which data were sought (e.g. participant and intervention characteristics, funding sources). Describe any assumptions made about any missing or unclear information.                                                                                         | 5-7                                    |
| Study risk of bias assessment | 11     | Specify the methods used to assess risk of bias in the included studies, including details of the tool(s) used, how many reviewers assessed each study and whether they worked independently, and if applicable, details of automation tools used in the process.                                    | 7                                      |
| Effect measures               | 12     | Specify for each outcome the effect measure(s) (e.g. risk ratio, mean difference) used in the synthesis or presentation of results.                                                                                                                                                                  | 7-8                                    |
| Synthesis methods             | 13a    | Describe the processes used to decide which studies were eligible for each synthesis (e.g. tabulating the study intervention characteristics and comparing against the planned groups for each synthesis (item #5)).                                                                                 | 6-7                                    |
|                               | 13b    | Describe any methods required to prepare the data for presentation or synthesis, such as handling of missing summary statistics, or data conversions.                                                                                                                                                | 7                                      |
|                               | 13c    | Describe any methods used to tabulate or visually display results of individual studies and syntheses.                                                                                                                                                                                               | 7                                      |
|                               | 13d    | Describe any methods used to synthesize results and provide a rationale for the choice(s). If meta-analysis was performed, describe the model(s), method(s) to identify the presence and extent of statistical heterogeneity, and software package(s) used.                                          | 7                                      |
|                               | 13e    | Describe any methods used to explore possible causes of heterogeneity among study results (e.g. subgroup analysis, meta-regression).                                                                                                                                                                 | not done due to the narrative approach |





## PRISMA 2020 Checklist

| Section and Topic             | Item # | Checklist item                                                                                                                                                                                                                                                                       | Location where item is reported                                                                                               |
|-------------------------------|--------|--------------------------------------------------------------------------------------------------------------------------------------------------------------------------------------------------------------------------------------------------------------------------------------|-------------------------------------------------------------------------------------------------------------------------------|
|                               | 13f    | Describe any sensitivity analyses conducted to assess robustness of the synthesized results.                                                                                                                                                                                         | not done due to the narrative approach                                                                                        |
| Reporting bias assessment     | 14     | Describe any methods used to assess risk of bias due to missing results in a synthesis (arising from reporting biases).                                                                                                                                                              | Not done due to the narrative approach                                                                                        |
| Certainty assessment          | 15     | Describe any methods used to assess certainty (or confidence) in the body of evidence for an outcome.                                                                                                                                                                                | Not done due to the narrative approach                                                                                        |
| <b>RESULTS</b>                |        |                                                                                                                                                                                                                                                                                      |                                                                                                                               |
| Study selection               | 16a    | Describe the results of the search and selection process, from the number of records identified in the search to the number of studies included in the review, ideally using a flow diagram.                                                                                         | 9                                                                                                                             |
|                               | 16b    | Cite studies that might appear to meet the inclusion criteria, but which were excluded, and explain why they were excluded.                                                                                                                                                          | Supplementary data, list of excluded studies                                                                                  |
| Study characteristics         | 17     | Cite each included study and present its characteristics.                                                                                                                                                                                                                            | 9-16                                                                                                                          |
| Risk of bias in studies       | 18     | Present assessments of risk of bias for each included study.                                                                                                                                                                                                                         | Supplementary Data – Table: Risk of Bias                                                                                      |
| Results of individual studies | 19     | For all outcomes, present, for each study: (a) summary statistics for each group (where appropriate) and (b) an effect estimate and its precision (e.g. confidence/credible interval), ideally using structured tables or plots.                                                     | Supplementary Data – Tables                                                                                                   |
| Results of syntheses          | 20a    | For each synthesis, briefly summarise the characteristics and risk of bias among contributing studies.                                                                                                                                                                               | 11-15                                                                                                                         |
|                               | 20b    | Present results of all statistical syntheses conducted. If meta-analysis was done, present for each the summary estimate and its precision (e.g. confidence/credible interval) and measures of statistical heterogeneity. If comparing groups, describe the direction of the effect. | Figures 3 and 4 in the results section (page 13)                                                                              |
|                               | 20c    | Present results of all investigations of possible causes of heterogeneity among study results.                                                                                                                                                                                       | Page 9 (study designs, participants, settings)<br>Pages 10 – 15 (interventions) narrative description of heterogenous studies |
|                               | 20d    | Present results of all sensitivity analyses conducted to assess the robustness of the synthesized results.                                                                                                                                                                           | Not done due to the narrative approach                                                                                        |



## PRISMA 2020 Checklist

| Section and Topic                              | Item # | Checklist item                                                                                                                                                                                                                             | Location where item is reported                                                           |
|------------------------------------------------|--------|--------------------------------------------------------------------------------------------------------------------------------------------------------------------------------------------------------------------------------------------|-------------------------------------------------------------------------------------------|
| Reporting biases                               | 21     | Present assessments of risk of bias due to missing results (arising from reporting biases) for each synthesis assessed.                                                                                                                    | Not done due to the narrative approach                                                    |
| Certainty of evidence                          | 22     | Present assessments of certainty (or confidence) in the body of evidence for each outcome assessed.                                                                                                                                        | Only for HbA1c measures: Figures 3 and 4; others not done due to narrative approach       |
| <b>DISCUSSION</b>                              |        |                                                                                                                                                                                                                                            |                                                                                           |
| Discussion                                     | 23a    | Provide a general interpretation of the results in the context of other evidence.                                                                                                                                                          | 17                                                                                        |
|                                                | 23b    | Discuss any limitations of the evidence included in the review.                                                                                                                                                                            | 21                                                                                        |
|                                                | 23c    | Discuss any limitations of the review processes used.                                                                                                                                                                                      | 21-22                                                                                     |
|                                                | 23d    | Discuss implications of the results for practice, policy, and future research.                                                                                                                                                             | 17-21                                                                                     |
| <b>OTHER INFORMATION</b>                       |        |                                                                                                                                                                                                                                            |                                                                                           |
| Registration and protocol                      | 24a    | Provide registration information for the review, including register name and registration number, or state that the review was not registered.                                                                                             | 8 + abstract                                                                              |
|                                                | 24b    | Indicate where the review protocol can be accessed, or state that a protocol was not prepared.                                                                                                                                             | 8 + abstract                                                                              |
|                                                | 24c    | Describe and explain any amendments to information provided at registration or in the protocol.                                                                                                                                            | 6                                                                                         |
| Support                                        | 25     | Describe sources of financial or non-financial support for the review, and the role of the funders or sponsors in the review.                                                                                                              | 23                                                                                        |
| Competing interests                            | 26     | Declare any competing interests of review authors.                                                                                                                                                                                         | 23                                                                                        |
| Availability of data, code and other materials | 27     | Report which of the following are publicly available and where they can be found: template data collection forms; data extracted from included studies; data used for all analyses; analytic code; any other materials used in the review. | In the supplement: search strategy for 6 databases, list of included and excluded studies |

From: Page MJ, McKenzie JE, Bossuyt PM, Boutron I, Hoffmann TC, Mulrow CD, et al. The PRISMA 2020 statement: an updated guideline for reporting systematic reviews. *BMJ* 2021;372:n71. doi: 10.1136/bmj.n71

For more information, visit: <http://www.prisma-statement.org/>
