# Supplementary material for: Randomised controlled trials on prevention, diagnosis and treatment of diabetes in African countries: a systematic review
Source: PubMed Central journal article supplement — BMJ Open. 2022 May 10;12(5):e050021. doi: 10.1136/bmjopen-2021-050021 (PMC9096485; doi:10.1136/bmjopen-2021-050021), 2022-05-10
Supplement: bmjopen-2021-050021supp001.pdf [file bmjopen-2021-050021supp001.pdf]

## Studies on patients with pre-DM

| Study name                                                  | Setting                            | Population                                                                                                                                                                                                                                                                                                                                                                                    | Intervention vs. Control                                                                                                                                                                                                                                                                                                                                                                     | Outcomes                                                          | Results                                                                                                                                                                                                                                                                                                      |
|-------------------------------------------------------------|------------------------------------|-----------------------------------------------------------------------------------------------------------------------------------------------------------------------------------------------------------------------------------------------------------------------------------------------------------------------------------------------------------------------------------------------|----------------------------------------------------------------------------------------------------------------------------------------------------------------------------------------------------------------------------------------------------------------------------------------------------------------------------------------------------------------------------------------------|-------------------------------------------------------------------|--------------------------------------------------------------------------------------------------------------------------------------------------------------------------------------------------------------------------------------------------------------------------------------------------------------|
| registration number<br>Design                               | Place, setting and time            | Inclusion / Exclusion criteria<br>Characteristics                                                                                                                                                                                                                                                                                                                                             | Description with duration                                                                                                                                                                                                                                                                                                                                                                    | Primary and secondary                                             | Longest follow-up period with intervention effects (IG vs. CG) with SD, 95%-CI or p value                                                                                                                                                                                                                    |
| <b>Strategies to enhance physical activity</b>              |                                    |                                                                                                                                                                                                                                                                                                                                                                                               |                                                                                                                                                                                                                                                                                                                                                                                              |                                                                   |                                                                                                                                                                                                                                                                                                              |
| <b>RezkAllah 2019</b><br>ACTRN126170<br>00631303<br>RCT     | Egypt, urban<br>07/2017-01/2018    | Pre-DM, 25-45 yrs, BMI of 25–30 kg/m <sup>2</sup> , HbA1C 5.7–6.4%, fasting glucose 100–125 mg/dL, sedentary lifestyle<br><br>No history of diabetes, cancer, prediabetic neuropathy, stroke, pulmonary embolism, or severe musculoskeletal problems restricting physical activity                                                                                                            | n=60<br>45 % females<br>age (yrs): 32.9±5.5<br>BMI (kg/m <sup>2</sup> ): 28.3±1.4<br><br>IG2 (n=20):<br>High-volume high intensity interval training, 40 min/session<br>vs.<br>IG1 (n=20):<br>Low-volume high intensity interval training, 25 min/session<br>Both with 90 % HR maximum, 3 times/week<br>CG (n=20):<br>No exercise intervention<br>Duration: 12 weeks                         | Primary: HbA1c<br>Other: fasting glucose                          | After 3 months<br><u>HbA1c (%)</u> :<br>Benefit for IG2 and IG1: Benefit for IG: 4.87±0.34 (-26 %) vs. 5.13±0.57 (-14.5 %) vs. 6.25±0.48 (+3.38 %) (p=0.0001)<br><u>fasting glucose (mg/dL)</u> :<br>Benefit for IG2 and IG1: 90.8±4.13 (-17.8 %) vs. 93.8±4.16 (-13.2 %) vs. 103.8±7.21 (+2.9 %) (p=0.0001) |
| <b>Strategies on nutrition</b>                              |                                    |                                                                                                                                                                                                                                                                                                                                                                                               |                                                                                                                                                                                                                                                                                                                                                                                              |                                                                   |                                                                                                                                                                                                                                                                                                              |
| <b>Krawinkel 2018</b><br>DRKS<br>00005131<br>Cross-over-RCT | Tanzania, urban<br>10/2013-03/2014 | Individuals with pre-DM age (yrs): 30 -65, FPG 5.6-6.9 mmol/l (100–125 mg/dL) on 2 days or on one day + HbA1c 5.7-7.5 %, BMI 27–35 kg/m <sup>2</sup> , BP 90/60-160/110 mmHg, waist circumference > 80/90 cm for women / men<br><br>No chronic disease, taking regular intake of medication, identified glucose-6-phosphatase-dehydrogenase deficiency, heavy alcohol consumption, pregnancy, | n=52<br>55% female<br>age (yrs): 47.5±8.7<br>HbA1c (%):5.85±0.43<br>FPG: (mmol/l): 5.34±0.49<br>BMI (kg/m <sup>2</sup> ):29.6±2.2<br><br>IG/CG (n=30):<br>started with bitter gourd supplementation (2,5 g) over 8 wks, followed by placebo over 8 wks<br>vs.<br>CG/IG (n=31):<br>first placebo over 8 wks, followed by bitter gourd over 8 wks<br>washout period: 4 wks<br>Duration 8 weeks | Primary:<br>FPG<br>Secondary:<br>HbA1c, Insulin, SBP, DBP, lipids | after 8 wks<br><u>FPG (mmol/l)</u> :<br>Benefit for IG/CG: MD 0.31 (0.08-0.54)<br><u>HbA1c: (%)</u> :<br>No differences (MD 0.05)                                                                                                                                                                            |

| Study name                                                                                                                                                                                                                                                                                                                                                                                                                           | Setting                 | Population                                        | Intervention vs. Control  | Outcomes              | Results                                                                                   |
|--------------------------------------------------------------------------------------------------------------------------------------------------------------------------------------------------------------------------------------------------------------------------------------------------------------------------------------------------------------------------------------------------------------------------------------|-------------------------|---------------------------------------------------|---------------------------|-----------------------|-------------------------------------------------------------------------------------------|
| registration number<br>Design                                                                                                                                                                                                                                                                                                                                                                                                        | Place, setting and time | Inclusion / Exclusion criteria<br>Characteristics | Description with duration | Primary and secondary | Longest follow-up period with intervention effects (IG vs. CG) with SD, 95%-CI or p value |
| lactation                                                                                                                                                                                                                                                                                                                                                                                                                            |                         |                                                   |                           |                       |                                                                                           |
| BMI: Body mass index; CG: Control group; CG/IG: Crossover from CG to IG; CI: Confidence interval; DBP: Diastolic blood pressure; DM: diabetes mellitus; FPG: fasting plasma glucose; HbA1c: haemoglobin A1c; IG/CG: cross over from IG to CG; IG: intervention group; n: number of participants; MD: mean difference; RCT: randomized controlled trial; SBP: Systolic blood pressure; SD: Standard-deviation; wks: weeks; yrs: years |                         |                                                   |                           |                       |                                                                                           |

**Supplementary Table 1:** Characteristics and results of studies on patients with pre-DM
