# Supplementary material for: Randomised controlled trials on prevention, diagnosis and treatment of diabetes in African countries: a systematic review
Source: PubMed Central journal article supplement — BMJ Open. 2022 May 10;12(5):e050021. doi: 10.1136/bmjopen-2021-050021 (PMC9096485; doi:10.1136/bmjopen-2021-050021), 2022-05-10
Supplement: bmjopen-2021-050021supp002.pdf [file bmjopen-2021-050021supp002.pdf]

## Studies on patients with DM1

| Study name                                          | Setting                                      | Population                                                                                                                                                                                                                                                       | Intervention vs. Control                                                                                                                                                                                                                                                                                                 | Outcomes                                                                                                                                     | Results                                                                                                                                                                                                                                                             |
|-----------------------------------------------------|----------------------------------------------|------------------------------------------------------------------------------------------------------------------------------------------------------------------------------------------------------------------------------------------------------------------|--------------------------------------------------------------------------------------------------------------------------------------------------------------------------------------------------------------------------------------------------------------------------------------------------------------------------|----------------------------------------------------------------------------------------------------------------------------------------------|---------------------------------------------------------------------------------------------------------------------------------------------------------------------------------------------------------------------------------------------------------------------|
| registration number<br>Design                       | Place, setting and time                      | Inclusion / Exclusion criteria<br>Characteristics                                                                                                                                                                                                                | Description with duration                                                                                                                                                                                                                                                                                                | Primary and secondary                                                                                                                        | Longest follow-up period with intervention effects (IG vs. CG) with SD, 95%-CI or p value                                                                                                                                                                           |
| <b>Educational strategies</b>                       |                                              |                                                                                                                                                                                                                                                                  |                                                                                                                                                                                                                                                                                                                          |                                                                                                                                              |                                                                                                                                                                                                                                                                     |
| <b>Malipa 2013</b><br>RCT                           | Zambia                                       | DM1, 16-19 yrs<br><br>n=40<br>55% females<br>16-17 yrs: 35 %<br>18-19 yrs: 65 %<br>Compliance: worse in IG 26.4 vs. 14.6 (p=0.001)<br>Impact of diabetes: 20.5<br>Worries about diabetes: 20.5<br>Satisfaction with life: 20.5                                   | <u>IG (n=20):</u> 1 meeting /wk over 8 wks<br><u>CG (n=20):</u> waiting list<br><u>Duration:</u> 8 wks                                                                                                                                                                                                                   | Compliance to treatment (Rating scale for compliance)<br>Quality of life (impact and worries about diabetes, satisfaction with life)         | After 2 months:<br>Compliance: better in IG (11.0 vs. 30; p<0.001)<br>Impact of diabetes: better in IG (16.8 vs. 24.2; p=0.045)<br>Worries about diabetes: better in IG (14.32 vs. 26.68; p=0.001)<br>Satisfaction with life: better in IG (28.5 vs. 12.5; p<0.001) |
| <b>Strategies to enhance physical activity</b>      |                                              |                                                                                                                                                                                                                                                                  |                                                                                                                                                                                                                                                                                                                          |                                                                                                                                              |                                                                                                                                                                                                                                                                     |
| <b>Salem 2010</b><br>RCT                            | Egypt, urban<br><br>02/2009-11/2009          | DM1 for ≥3 years, 12-18 yrs, HbA1c ≥7.5 % for ≥6 months<br><br>no significant diabetic complications limiting exercise like, uncontrolled hypertension, diabetic keto-acidosis, severe hypoglycemia within the past 3 months, patients on lipid lowering therapy | n=196<br>61.7 % female<br>age (yrs): 14.78 ± 2.31<br>HbA1c (%): 8.7±1.7<br>duration of diabetes (yrs): 4.6 ± 1.9<br><br><u>IG2 (n=73):</u> attended exercise sessions three times/week vs. <u>IG 1 (n=75):</u> attended exercise sessions once times/week vs. <u>CG (n=48):</u> no exercise<br><u>Duration:</u> 6 months | glycemic control, plasma lipids values, blood pressure, severity and frequency of hypoglycemia, anthropometric measurements and insulin dose | Change over 6 months:<br><u>HbA1c (%)</u> :<br>Benefit for IG2 and IG1: 7.8 ± 1.0 vs. 8.1 ± 1.1 vs. 8.9 ± 1.3% (p=0.2)                                                                                                                                              |
| <b>Strategies on nutrition</b>                      |                                              |                                                                                                                                                                                                                                                                  |                                                                                                                                                                                                                                                                                                                          |                                                                                                                                              |                                                                                                                                                                                                                                                                     |
| <b>Abdulrhman 2013</b><br>NCT01554566<br>Cross-over | Egypt, urban, tertiary care<br><br>01/2010 - | DM1, age > 2 yrs, HbA1c< 10 %<br><br>no renal or hepatic impairment, coexisting                                                                                                                                                                                  | n=20<br>50 % females<br>age (yrs): 11.3 ± 4.3<br>duration of diabetes (yrs): 4.7±4.5                                                                                                                                                                                                                                     | <u>IG/ CG (n=10):</u><br>Honey consumption (0.5 ml/kg body weight per day)<br>vs.                                                            | After 12 weeks: (IG/CG vs. CG/IG):<br><u>HbA1c (%)</u> :<br>▪ Benefit with CG/IG: 6.7±0.9 vs. 5.9±0.8 (p<0.01)<br>▪ no differences in change in period 1: -                                                                                                         |

| Study name<br>registration<br>number<br>Design     | Setting<br>Place,<br>setting and<br>time | Population<br>Inclusion / Exclusion criteria<br>Characteristics                                                                                                                                                                                                                                                                                                     | Intervention vs. Control<br>Description with duration                                                                                             | Outcomes<br>Primary and secondary                                                                                                                                                                                                                                                     | Results<br>Longest follow-up period with<br>intervention effects (IG vs. CG) with<br>SD, 95%-CI or p value                                                                                                                                                                                                                                                                                                               |
|----------------------------------------------------|------------------------------------------|---------------------------------------------------------------------------------------------------------------------------------------------------------------------------------------------------------------------------------------------------------------------------------------------------------------------------------------------------------------------|---------------------------------------------------------------------------------------------------------------------------------------------------|---------------------------------------------------------------------------------------------------------------------------------------------------------------------------------------------------------------------------------------------------------------------------------------|--------------------------------------------------------------------------------------------------------------------------------------------------------------------------------------------------------------------------------------------------------------------------------------------------------------------------------------------------------------------------------------------------------------------------|
| RCT                                                | 10 / 2011                                | diseases or therapies that may affect body weight or serum lipids                                                                                                                                                                                                                                                                                                   | HbA1c (%): 7.21±0.76<br>fasting glucose (mg/dl): 154.5±22.5                                                                                       | CG/IG (n=10): changed after 12 wks and received than honey<br>Duration: 12 wks.                                                                                                                                                                                                       | postprandial glucose, HbA1c, serum lipid profile<br>5.83 ± 13.66 vs. 2.94±8.82 (p=0.105)<br>Fasting glucose (mg/dl):<br>• benefit with CG/IG: 142.7 ±26.6 vs. 116.7±19.4 (p<0.01)<br>benefit with IG/CG in period 1:-21.51 ± 10.84 vs. -0.08±5.14 (p=0.001)                                                                                                                                                              |
| <b>Mohamad 2009</b><br><br>RCT                     | Egypt, urban                             | DM1, age 17 to 20 yrs<br><br>no acute metabolic complications like diabetic ketoacidosis, hypoglycaemia, cardiovascular events, renal or acute infections                                                                                                                                                                                                           | n=64<br>30 % female<br>age (yrs): 19.9±6.8<br>HbA1c (%): 9.52±2.08<br>fasting glucose (mg/dl): 228.7±13.5<br>BMI (kg/m <sup>2</sup> ): 18.82±3.01 | IG (n=27):<br>camel milk (500 ml)<br>+usual care<br>vs.<br>CG (n=27):<br>usual care for diabetes (i.e. diet, exercise, insulin mixtard)<br>Duration: 16 weeks                                                                                                                         | Not specified:<br>HbA1c, human C-peptide, lipid profile, serum insulin, anti-insulin antibodies, creatinine clearance, albumin extraction in 24 h urine, BMI, Diabetes QoL score, fasting glucose<br>After 16 wks<br>HbA1c (%):<br>Benefit for IG: 7.16±1.84 vs. 9.59±2.05<br>fasting glucose (mg/dl):<br>benefit for IG: 227.2±17.7 vs. 98.9±16.2                                                                       |
| <b>van der Hoogt 2017</b><br><br>cross-over<br>RCT | South Africa                             | DM1, age 4-17 yrs on insulin pump therapy, HbA1c>9,6% for ≥3months, BMI/age z.score -1 to < 3, total daily insulin use of >0,5 u/kg<br>no remission of diabetes, smoking, coeliac disease, cystic fibrosis, diseases or medication that are associated with delayed gastric emptying or altered digestion, glucocorticoids, oral diabetic drugs, no acute illnesses | n=32<br>41% female<br>age (yrs): 10.4±4.0<br>HbA1c (%): 8.2±0.8<br>duration of Diabetes (yrs): 3.5 (1.5-8.0)                                      | IG1 (n=22):<br>1 home-based_low fat and protein meal<br>vs.<br>IG2 (n=22):<br>1 high fat and protein meal with identical carbohydrate content<br>two meals were consumed at dinner time (18:00) under parental supervision at least 1 day apart within one month<br>Duration: 3months | primary: peak sensor glucose value post-meal, time to peak sensor glucose, time of first and largest correction bolus, total correction insulin, total meal insulin, additional insulin required ,area under the sensor glucose response curve (AUC) (≥ 8 mmol/L), duration of elevated post-prandial glucose<br>Change over 12 weeks<br>Occurance of hypoglycaemic events:<br>7 (32 %) vs. 1 patients after IG1 vs. IG2 |
| <b>Medical device</b>                              |                                          |                                                                                                                                                                                                                                                                                                                                                                     |                                                                                                                                                   |                                                                                                                                                                                                                                                                                       |                                                                                                                                                                                                                                                                                                                                                                                                                          |
| Elbarbary 2016<br><br>RCT                          | Egypt, urban<br><br>06/2014-07/2014      | DM1, adolescents and adults who wished to fast the month of Ramadan with insulin pump for ≥6 months and attending the whole                                                                                                                                                                                                                                         | n=73<br>68.3% female<br>age (yrs): 15.6±2.7<br>HbA1c (%): 7.65±0.9<br>BMI (kg/m <sup>2</sup> ):                                                   | Insulin pump therapy during Ramadan fasting<br><br>IG (n=25):<br>sensor with low glucose                                                                                                                                                                                              | Primary: hypoglycaemia<br>Other: glucose value, number of 'full fasted days', emergency hospital visit for diabetes-related<br>After 1 months:<br>Glucose value (mg/dl):<br>152.5±17.3 vs. 141±33.8 (p=0.9)<br>Complications:<br>Number of hypoglycaemic excursions:                                                                                                                                                     |

| Study name<br>registration<br>number<br>Design      | Setting<br>Place,<br>setting and<br>time   | Population<br>Inclusion / Exclusion criteria<br>Characteristics                                                                                                                                                                                                                                                                      | Intervention vs. Control<br>Description with duration                                                                                                                     | Outcomes<br>Primary and secondary                                                                                                                                                                                                                                 | Results<br>Longest follow-up period with<br>intervention effects (IG vs. CG) with<br>SD, 95%-CI or p value                                                                                                                                                                                      |
|-----------------------------------------------------|--------------------------------------------|--------------------------------------------------------------------------------------------------------------------------------------------------------------------------------------------------------------------------------------------------------------------------------------------------------------------------------------|---------------------------------------------------------------------------------------------------------------------------------------------------------------------------|-------------------------------------------------------------------------------------------------------------------------------------------------------------------------------------------------------------------------------------------------------------------|-------------------------------------------------------------------------------------------------------------------------------------------------------------------------------------------------------------------------------------------------------------------------------------------------|
|                                                     |                                            | education session 2 months<br>before fasting and committed<br>to follow-up the given<br>instructions<br><br>no diabetic ketoacidosis,<br>episodes of severe<br>hypoglycaemia or symptoms<br>of uncontrolled diabetes in<br>the last 6 months, diabetic<br>microvascular complications<br>or macrovascular disease,<br>pregnant women | 24.56±3.5<br>duration of diabetes<br>(yrs): 5.8±2.9<br>on pump therapy<br>(yrs): 1.73±0.99                                                                                | suspension activation<br>vs.<br><u>CG (n=35):</u><br>sensor without low<br>glucose suspension<br>activation<br><u>Duration:</u> 1 month                                                                                                                           | problem<br><br>3.68±1.62 vs. 6.7±2.1 (p=0.001)<br>Number of hyperglycaemic excursions:<br>17.0±4.0 vs. 23.0±7.6 (p=0.001)<br>No severe hypoglycaemic events, no<br>episodes of diabetic ketoacidosis, no<br>hyperglycaemic events associated with<br>ketosis no deaths or device-related<br>SAE |
| <b>Pharmacological Strategies</b>                   |                                            |                                                                                                                                                                                                                                                                                                                                      |                                                                                                                                                                           |                                                                                                                                                                                                                                                                   |                                                                                                                                                                                                                                                                                                 |
| <b>Elbarbary<br/>2018</b><br>NCT0292825<br><br>RCT  | Egypt,<br>urban                            | DM1, age: 9 - 18 yrs, ≥ 5 yrs<br>disease duration, active<br>diabetic nephropathy in the<br>form of microalbuminuria,<br>HbA1c ≤ 8.5 %<br><br>no infection, renal<br>impairment due to other<br>causes other than diabetes,<br>other diabetic complications,<br>hypersensitivity to carnosine                                        | n=90<br>52.3 % female<br>age (yrs): 12.85±3.1<br>HbA1c (%):7.85±1.95<br><br>Patients in both groups<br>received oral ACE-Is<br>captopril 25 mg<br><u>Duration:</u> 12 wks | <u>IG (n=45):</u><br>1 g/d carnosine<br>vs.<br><u>CG (n=45):</u><br>control/placebo group<br><br><u>Primary:</u> change in<br>tubular damage marker<br><u>Secondary:</u> urinary<br>albumin excretion (UAE),<br>oxidative stress markers<br><u>Safety:</u> any AE | After 12 wks:<br><u>HbA1c (%):</u><br>• Benefit for IG: 7.4 ±1.3 vs. 8.3±2.4<br>• change -9.88±7.12 vs. 3.89±2.28<br>(p=0.005)<br>No adverse reactions were reported                                                                                                                            |
| <b>Elbarbary<br/>2020</b><br>NCT03594240<br><br>RCT | Egypt,<br>urban<br><br>03/2017-<br>03/2018 | DM1 on insulin therapy with<br>> 5 yrs of disease duration,<br>12-18 yrs, active<br>nephropathy, HbA1c< 8.5 %,<br><br>no infections, renal<br>impairment due to other<br>causes than diabetes, other<br>diabetic complications ,                                                                                                     | n=80<br>55% female<br>age (yrs): 15.4 ± 1.6<br>HbA1c (%):7.95±0.5<br>fasting glucose<br>(mg/dl): 114.5±21.8<br>duration of diabetes<br>(years): 8.65 ± 2.65               | both groups received oral<br>angiotensin-converting-<br>enzyme inhibitors<br>(captopril)<br><br><u>IG (n=40)</u> oral vitamin B<br>complex (B1,B6,B12)<br>once daily<br>vs.                                                                                       | after 12 weeks<br><u>HbA1c (%):</u><br>Benefit for IG: 7.5±0.6 vs. 8.0±0.6<br><u>Fasting glucose (mg/dl):</u><br>107.7±14.1 vs. 116.4±17 (p=131)                                                                                                                                                |

| Study name                                                                                                                                                                                                                                                                                                                                        | Setting                 | Population                                                                                                                                          | Intervention vs. Control                               | Outcomes              | Results                                                                                   |
|---------------------------------------------------------------------------------------------------------------------------------------------------------------------------------------------------------------------------------------------------------------------------------------------------------------------------------------------------|-------------------------|-----------------------------------------------------------------------------------------------------------------------------------------------------|--------------------------------------------------------|-----------------------|-------------------------------------------------------------------------------------------|
| registration number<br>Design                                                                                                                                                                                                                                                                                                                     | Place, setting and time | Inclusion / Exclusion criteria<br>Characteristics                                                                                                   | Description with duration                              | Primary and secondary | Longest follow-up period with intervention effects (IG vs. CG) with SD, 95%-CI or p value |
|                                                                                                                                                                                                                                                                                                                                                   |                         | elevated liver enzymes, hyper-or hypothyroidism, hypertension, neoplasm, taking any vitamins or food supplements within 1 months before study start | <u>CG (n=40): placebo</u><br><u>Duration: 12 weeks</u> |                       |                                                                                           |
| BMI: Body mass index; CG: Control group; CG/IG: Crossover from CG to IG; CI: Confidence interval; DM1: Type 1 diabetes; FPG: fasting plasma glucose; HbA1c: haemoglobin A1c; IG/CG: cross over from IG to CG; IG: intervention group; n: number of participants ;RCT: randomized controlled trial; SD: Standard-deviation; wks: weeks; yrs: years |                         |                                                                                                                                                     |                                                        |                       |                                                                                           |

**Supplementary Table 2:** Characteristics and results of studies on patients with DM1
