# Supplementary material for: Randomised controlled trials on prevention, diagnosis and treatment of diabetes in African countries: a systematic review
Source: PubMed Central journal article supplement — BMJ Open. 2022 May 10;12(5):e050021. doi: 10.1136/bmjopen-2021-050021 (PMC9096485; doi:10.1136/bmjopen-2021-050021), 2022-05-10
Supplement: bmjopen-2021-050021supp003.pdf [file bmjopen-2021-050021supp003.pdf]

## RCTs mainly including patients with DM2

| Study name<br>registration<br>number<br>Design | Setting<br>Place,<br>setting and<br>time            | Inclusion / Exclusion criteria                                                             | Population<br>Characteristics                                                                                                                                                            | Intervention vs. Control<br>Description with duration                                                                                                                                                                                                                                 | Outcomes<br>Primary and secondary                                                                                                                                                                                                                                                                                                                                                              | Results<br>Longest follow-up period with<br>intervention effects (IG vs. CG) with<br>SD, 95%-CI or p value                                                                                                                                                                                                                                                                                                                                                                                                                                                           |
|------------------------------------------------|-----------------------------------------------------|--------------------------------------------------------------------------------------------|------------------------------------------------------------------------------------------------------------------------------------------------------------------------------------------|---------------------------------------------------------------------------------------------------------------------------------------------------------------------------------------------------------------------------------------------------------------------------------------|------------------------------------------------------------------------------------------------------------------------------------------------------------------------------------------------------------------------------------------------------------------------------------------------------------------------------------------------------------------------------------------------|----------------------------------------------------------------------------------------------------------------------------------------------------------------------------------------------------------------------------------------------------------------------------------------------------------------------------------------------------------------------------------------------------------------------------------------------------------------------------------------------------------------------------------------------------------------------|
| <b>Educational strategies</b>                  |                                                     |                                                                                            |                                                                                                                                                                                          |                                                                                                                                                                                                                                                                                       |                                                                                                                                                                                                                                                                                                                                                                                                |                                                                                                                                                                                                                                                                                                                                                                                                                                                                                                                                                                      |
| <b>Abaza 2017</b><br>NCT02868320<br><br>RCT    | Egypt,<br>urban,<br>tertiary<br>care,<br>03-07/2015 | DM2, mobile phone, capable<br>to read SMS or live with<br>someone who could read           | n=73<br>56 % females<br>age (yrs): 51.5±9.2<br>majority had had<br>diabetes for > 1 yr<br>hypertension: 41.1 %<br>on insulin: 19.2 %<br>DM complication:<br>80.8 %<br>HbA1c (%): 9.7±2.7 | Diabetes awareness<br>program:<br>paper-based educations<br>material plus<br><u>IG (n=34)</u> : daily messages<br>and weekly reminders<br>addressing various<br>diabetes care categories<br>vs.<br><u>CG (n=39)</u> : paper-based<br>educations material<br><u>Duration</u> : 12 wks. | <u>Primary</u> : change in Hba1C<br><u>Secondary</u> :<br>Random blood glucose<br>levels, body weight,<br>adherence of treatment<br>and medication, diabetes<br>self-efficacy and<br>knowledge, rate of<br>hospital/ER visits,<br>frequency of<br>measurements, regular<br>exercise, patients<br>confidence in healthcare<br>provider and satisfaction,<br>healthcare provider's<br>reputation | After 3 months:<br><u>HbA1c (%)</u> :<br>• No differences: 8.73 ±1.98 vs.<br>8.84±2.40, MD <sub>a</sub> : 0.290 (-0.402 to<br>0.983; p = 0.406)<br>• Benefit with IG: 47 vs. 15 % achieved<br>the targeted 1% drop (p = 0.003)<br><u>Random blood glucose</u> (mg/dl):<br>• No difference: 181±65 vs. 201±87<br>(p=0.288)<br><u>Treatment adherence (scores)</u> :<br>• Benefit with IG in SCI 3.42±0.48 vs.<br>2.52±0.49 (p<0.001) and Morisky:<br>3.76±0.55 vs. 2.74±1.07 (p<0.001)<br><u>Hospital /ER admission (%)</u> :<br>No differences: 0 vs. 10.3 (p=0.118) |
| <b>Adibe 2013</b><br><br>RCT                   | Nigeria,<br>urban,<br>tertiary care                 | DM2, age≥ 18 yrs with oral<br>hypoglycemic and / or insulin<br>therapy<br><br>no pregnancy | n=220<br>58 % females<br>age (yrs): 52.6±7.9<br>duration of diabetes<br>(yrs): 4.7±2.5,<br>60.5% with diabetes<br>> 5 yrs<br>on insulin: 13.6 %<br>hypertension: 60.5 %                  | <u>IG (n=110)</u> :<br>structured self-care<br>education and training<br>program by pharmacists<br>and nurses<br>vs.<br><u>CG (n=110)</u> : usual /<br>conventional care<br><u>Duration</u> : 12 months                                                                               | <u>Primary</u> : incremental<br>cost-utility ratio, net<br>monetary benefit<br><u>Other</u> : quality of life                                                                                                                                                                                                                                                                                  | After 12 months:<br><u>Quality of life</u> :<br>• Benefit with IG: 0.86 ± 0.12 vs. 0.64 ±<br>0.10 (p=0.0001) improved single<br>attributes except "hearing" functioning<br>of the patients<br><u>Costs</u> :<br>• benefit of \$0.76±0.15 vs. \$0.64± 0.15<br>QALY/patient and year; MD: \$ 0.12<br>(0.07 to 0.16)<br>• incremental cost-utility ratio of \$571<br>per QALY                                                                                                                                                                                           |
| <b>Adjei 2015</b>                              | Ghana,<br>urban                                     | DM                                                                                         | n=200<br>64.5% female                                                                                                                                                                    | <u>IG: (n=100)</u> :<br>electronical reminder for                                                                                                                                                                                                                                     | <u>Primary</u> : Compliance with<br>appointment dates                                                                                                                                                                                                                                                                                                                                          | After 6 months:<br><u>Adherence to appointment schedules</u>                                                                                                                                                                                                                                                                                                                                                                                                                                                                                                         |

| Study name<br>registration<br>number<br>Design     | Setting<br>Place,<br>setting and<br>time                                                   | Population<br>Inclusion / Exclusion criteria<br>Characteristics                                                                                                                                                                                                                                                                                                                                                                                                                    | Intervention vs. Control<br>Description with duration                                                                                                                                                                                                                                                                                            | Outcomes<br>Primary and secondary                                                                                                                                                                                                                                                                                                                                                                            | Results<br>Longest follow-up period with<br>intervention effects (IG vs. CG) with<br>SD, 95%-CI or p value                                                                                                                                                                                                                                                                                                                                                                                                                                                                                                                                                                                                                                                                                           |
|----------------------------------------------------|--------------------------------------------------------------------------------------------|------------------------------------------------------------------------------------------------------------------------------------------------------------------------------------------------------------------------------------------------------------------------------------------------------------------------------------------------------------------------------------------------------------------------------------------------------------------------------------|--------------------------------------------------------------------------------------------------------------------------------------------------------------------------------------------------------------------------------------------------------------------------------------------------------------------------------------------------|--------------------------------------------------------------------------------------------------------------------------------------------------------------------------------------------------------------------------------------------------------------------------------------------------------------------------------------------------------------------------------------------------------------|------------------------------------------------------------------------------------------------------------------------------------------------------------------------------------------------------------------------------------------------------------------------------------------------------------------------------------------------------------------------------------------------------------------------------------------------------------------------------------------------------------------------------------------------------------------------------------------------------------------------------------------------------------------------------------------------------------------------------------------------------------------------------------------------------|
| RCT                                                |                                                                                            | age (yrs):<br>< 50 yrs: 63 %<br>> 50 yrs: 37 %<br>fasting glucose<br>(mmol/l): 10.4±3.8                                                                                                                                                                                                                                                                                                                                                                                            | clinical appointments of<br>patients + alert system<br>for abnormal laboratory<br>results<br>vs.<br>CG: (n=100):<br>usual diabetes care,<br>paper based method<br>Duration: 6 months                                                                                                                                                             | Other: metabolic risk<br>factors, BMI                                                                                                                                                                                                                                                                                                                                                                        | (%)<br>Benefit for IG: 97.8 vs. 89.4 (p=0.010)<br>Fasting glucose (mmol/l):<br>Benefit for IG: 8.04±2.14 vs. 8.85±2.63;<br>MD 0.4 (-0.59 to -0.36, p=0.022)                                                                                                                                                                                                                                                                                                                                                                                                                                                                                                                                                                                                                                          |
| <b>Amendezo<br/>2017</b><br>NCT02032108<br><br>RCT | Rwanda,<br>urban,<br>tertiary care                                                         | DM2>3mths, age>21yrs<br><br>no pregnancy or severe co-<br>morbid illnesses.                                                                                                                                                                                                                                                                                                                                                                                                        | n=251<br>69.3% females<br>age (yrs): 50.9 ±10.9<br>BMI (kg/m <sup>2</sup> ): 27.9<br>(27.0-28.5)<br>duration of diabetes :<br><10 yrs: 73.7%, >10<br>yrs: 16.3%<br>HbA1c (%): 8.98±8.6-<br>9.3                                                                                                                                                   | IG (n=115):<br>standard care plus<br>monthly lifestyle<br>education sessions of 45<br>min duration<br>vs.<br>CG (n=108): standard<br>care<br>Duration: 12 months                                                                                                                                                                                                                                             | Primary: difference in<br>HbA1c<br>Secondary: fasting<br>glucose, systolic and<br>diastolic blood pressure,<br>BMI<br><br>after 12 months:<br>HbA1c (%):<br>Benefit for IG with median reductions<br>of -1.70 (-2.09 to -1.31) vs. -0.52 (-0.95<br>to -0.10); MD: -0.72 ( -1.14 to -0.30;<br>p< 0.001)<br>Fasting glucose (mmol/L):<br>6.9 (6.45 to 7.36) vs. 9.02 (8.18 to<br>9.87) (p<0.001)                                                                                                                                                                                                                                                                                                                                                                                                       |
| <b>Chraibi 2017</b><br>NCT01589653<br><br>RCT      | Egypt,<br>Indonesia,<br>Morocco,<br>Saudi<br>Arabia,<br>Vietnam<br><br>05/2012-<br>07/2015 | DM2 with diagnosis ≥ 12<br>months, age≥18 , currently<br>being treated with NPH<br>Insulin for ≥ 3 months +<br>metformin (1000-1500 mg)<br>for ≥ 2 months, HbA1c ≥ 7.0%<br>≤10%, BMI ≤ 40.0 kg/m <sup>2</sup><br><br>no treatment with<br>thiazolidinedione, glucagon-<br>like peptide-1 receptor<br>agonists, pramlintide within<br>the last 3 months , >1 IU/kg<br>NPH insulin daily; previous<br>use of premixed or bolus<br>insulin, > 1 severe<br>hypoglycemic episode during | n=155<br>74.9 % female<br>age (yrs): 54.5 ±10.0<br>BMI (kg/m <sup>2</sup> ):<br>29.05±4.9<br>HbA1c (%): 8.6 ±0.83<br>fasting glucose<br>(mmol/L): 8.97<br>duration of diabetes<br>(yrs): 9.5±5.8<br>African patients:<br>• Egypt: 25.75 %<br>• Morocco: 27.7 %<br>Diabetic nephropathy<br>/ neuropathy /<br>retinopathy (%): 3.2 /<br>16.1 / 3.2 | IG (n=76):<br>patient driven titration of<br>Biphasic insulin aspart 30<br>twice daily, 3 clinic visits<br>vs.<br>CG (n=79):<br>physician driven titration<br>twice daily, 6 clinic visits<br><br>Titration in both arms<br>according to the titration<br>protocol bases on self-<br>measured plasma glucose<br>values, measured twice<br>daily on 3 preceding days,<br>telephone contact<br>whenever deemed | Primary: change in HbA1c<br>Secondary: proportion of<br>patients achieving the<br>ADA target of HbA1c<br><7.0 % and the HbA1c<br>target of <6.5 % after<br>20 weeks, FPG changes,<br>hypoglycemic episodes,<br><br>Change over 5 months:<br>HbA1c (%):<br>• Decreased in both arms with non-<br>inferiority between groups: MD -0.23<br>(-0.54 to 0.08)<br>• More patients reached HbA1c <7.0%:<br>40.8 vs. 29.1 %, RR: 1.79 (0.87 to 3.65)<br>and <6.5%: 25 vs. 19 %; RR: 1.52 (0.67<br>to 3.46)<br>• More patients reached target HbA1c<br>levels without severe or minor<br>hypoglycemic episodes: <7.0%: 38 vs.<br>27.8 %, RR: 1.52 (0.61 to 3.79), <6.5%:<br>18 vs. 14.8 %; RR 1.13 (0.36 to 3.52)<br>FPG (mmol/l):<br>• Decreased in both arms with no<br>difference between groups: 0.95±0.28 |

| Study name<br>registration<br>number<br>Design           | Setting<br>Place,<br>setting and<br>time              | Population<br>Inclusion / Exclusion criteria<br>Characteristics                                                                                     | Intervention vs. Control<br>Description with duration                                                                                                            | Outcomes<br>Primary and secondary                                                                                                                                                                                                                                                 | Results<br>Longest follow-up period with<br>intervention effects (IG vs. CG) with<br>SD, 95%-CI or p value                                                                                                                                                                                                                                                                                                     |                                                                                                                             |
|----------------------------------------------------------|-------------------------------------------------------|-----------------------------------------------------------------------------------------------------------------------------------------------------|------------------------------------------------------------------------------------------------------------------------------------------------------------------|-----------------------------------------------------------------------------------------------------------------------------------------------------------------------------------------------------------------------------------------------------------------------------------|----------------------------------------------------------------------------------------------------------------------------------------------------------------------------------------------------------------------------------------------------------------------------------------------------------------------------------------------------------------------------------------------------------------|-----------------------------------------------------------------------------------------------------------------------------|
|                                                          |                                                       | the previous 12 month, impaired kidney or hepatic function, proliferative retinopathy or maculopathy requiring treatment                            | Macroangiopathy (%): 5.2<br>necessary<br><u>Duration</u> : 20 weeks                                                                                              |                                                                                                                                                                                                                                                                                   | vs. 0.67±0.28; MD: -0.28 (-1.07 to 0.52)<br><u>Costs</u><br>• Less frequent clinic visits to healthcare professionals in IG: 4.8±0.65 vs. 7.5±1.42 visits/patient<br><u>Complications</u> :<br>• hypoglycemic episodes: no difference: 608.4 vs. 789.2 / 100 patient-years of exposure; RR: 0.74 (0.44; 1.23)<br>treatment-emergent AEs: no difference: 324.2 vs. 302.2 events / 100 patient-years of exposure |                                                                                                                             |
| <b>Debussche 2018</b><br>NCT01485913<br><br>RCT          | Mali, urban, secondary care,<br><br>07/2011-02/2013   | DM2, age 30-80 yrs, HbA1c ≥ 8 %, no DM1, severe diabetes complications or concomitant illnesses that threatened their functional or vital prognosis | n=151<br>76.2% female<br>age (yrs): 52.5±9.8<br>BMI (kg/m <sup>2</sup> ):28.6±5.4                                                                                | <u>IG (n=76)</u> : peer-led structured patient education received culturally tailored structured patient education (3 courses of 4 sessions) delivered in the community by five trained peer educators vs.<br><u>CG (n=75)</u> : conventional care alone<br><u>Duration</u> :1 yr | <u>Primary</u> : HbA1c<br><u>Secondary</u> : anthropometric indicators (weight and BMI, waist circumference), SBP, DBP, anti-diabetic and anti-hypertensive treatment, knowledge score, dietary practices                                                                                                                                                                                                      | Change to 12 months<br><u>HbA1c (%)</u> :<br>• Benefit in IG: MD 1.05 % (-1.54;-0.56) vs. -0.15 % (-0.56; 0.26) (p = 0.006) |
| <b>Essien 2017</b><br><br>PACTR20130200047835<br><br>RCT | Nigeria, urban, tertiary care,<br><br>09/2013-05/2014 | DM1 or DM2, age: ≥ 18 yrs, HbA1c> 8.5 %, able to engage in moderate exercise, no eye disease that would limit the ability to read                   | n=118<br>60.2 % female<br>age (yrs): 52.7±10.5<br>BMI (kg/m <sup>2</sup> ): 28.9±7.5<br>HbA1c (%):10.7±1.6<br>type of diabetes<br>• DM1: 14.4 %<br>• DM2: 85.6 % | <u>IG: (n=59)</u> : intensive and systematic disease self-management education programme (invitation and encouragement by clinical staff to attend 12 structured teaching sessions) vs.                                                                                           | <u>Primary</u> : HbA1c<br><br>After 6 months:<br><u>HbA1c (%)</u> :<br>8.4 (8 to 8.9) vs. 10.2 (9.8 to 10.7);<br>MD <sub>a</sub> : -1.8 (-2.4 to -1.2); (p < 0.0001)                                                                                                                                                                                                                                           |                                                                                                                             |

| Study name<br>registration<br>number<br>Design               | Setting<br>Place,<br>setting and<br>time                                            | Inclusion / Exclusion criteria                                                                                                                                                                  | Population<br>Characteristics                                                                                                                                                                                                                       | Intervention vs. Control<br>Description with duration                                                                                                                                                                                                                                                                                                                                                                   | Outcomes<br>Primary and secondary                                                                                                                                             | Results<br>Longest follow-up period with<br>intervention effects (IG vs. CG) with<br>SD, 95%-CI or p value                                                                                                                                                                                                                                                                                                                                                     |
|--------------------------------------------------------------|-------------------------------------------------------------------------------------|-------------------------------------------------------------------------------------------------------------------------------------------------------------------------------------------------|-----------------------------------------------------------------------------------------------------------------------------------------------------------------------------------------------------------------------------------------------------|-------------------------------------------------------------------------------------------------------------------------------------------------------------------------------------------------------------------------------------------------------------------------------------------------------------------------------------------------------------------------------------------------------------------------|-------------------------------------------------------------------------------------------------------------------------------------------------------------------------------|----------------------------------------------------------------------------------------------------------------------------------------------------------------------------------------------------------------------------------------------------------------------------------------------------------------------------------------------------------------------------------------------------------------------------------------------------------------|
|                                                              |                                                                                     |                                                                                                                                                                                                 |                                                                                                                                                                                                                                                     | <u>CG (n=59):</u> conventional<br>disease-self-management<br>education<br><u>Duration:</u> 6 months                                                                                                                                                                                                                                                                                                                     |                                                                                                                                                                               |                                                                                                                                                                                                                                                                                                                                                                                                                                                                |
| <b>Fairall 2016</b><br>ISRCTN20283<br>604<br><br>Cluster-RCT | South Africa<br>,<br>urban/rural,<br>primary<br>care,<br><br>03/2011 –<br>11 / 2011 | age ≥ 18 yrs , clinics providing<br>service for NCD Patients with<br>DM, hypertension, chronic<br>respiratory disease or<br>depression, with self-<br>reported hypoglycaemic (in<br>case of DM) | n= 38 public sector<br>primary care clinics,<br>4393 patients,<br>n=1842 with DM<br>73 % female<br>age (yrs):median,<br>IQR): 52 (42-61) vs. 52<br>(44-62)<br>BMI (kg/m <sup>2</sup> ): 30±8<br>HbA1c (%):9 (4-17), in<br>HbA1c in DM≥ 7 %:<br>77 % | <u>IG (n=2166, 851 with<br/>DM):</u><br>Nurses were trained to<br>use a primary care<br>programme to support<br>and expand nurses' role in<br>NCD care and contains a<br>clinical management tool<br>with enhances<br>prescribing provisions<br>vs.<br><u>CG (n=2227, 991 with<br/>DM):</u><br>Nurses continued to use<br>the Lung Health and<br>HIV/AIDS approach with<br>usual training<br><u>Duration:</u> 14 months | <u>Primary (for DM):</u><br>treatment intensification<br>(addition or increase in<br>dose of metformin and/or<br>sulphonylurea, insulin,<br>ACE-inhibitor, aspirin,<br>statin | over 14 months<br><u>HbA1c (%):</u><br><ul style="list-style-type: none"> <li>• &lt;7 %: 41 vs. 38 %; RR 1.08 (0.77 to 1.52; p=0.638)</li> <li>• 7-10 %: 69 vs. 55 %; RR 1.30 (1.16 to 1.47; p&lt;0.001)</li> <li>• &gt;10 %: 71 vs. 73 %; RR 0.97 (0.81 to 1.16; p=0.703)</li> </ul> <u>Treatment intensification rates* (%):</u><br><ul style="list-style-type: none"> <li>• 57% vs. 50%, RRa: 1.11 (0.99 to 1.26) (p=0.083) for patients with DM</li> </ul> |
| <b>Hailu 2018</b><br>NCT03185689<br><br>RCT                  | Ethiopia,<br>urban,<br><br>02/2016-<br>10/2017                                      | DM2, age > 18 yrs<br><br>no DM1 or GDM, pregnant<br>women, severe cognitive or<br>physical impairment, and<br>terminally ill people                                                             | n=220<br>33 % female<br>age (yrs): 54.5±10<br>BMI (kg/m <sup>2</sup> ):25±4<br>HbA1c (%):10.5±4                                                                                                                                                     | <u>IG (n= 116):</u><br>Nurse-led disease-<br>management education:<br>6 sessions, supported<br>with illustrative pictures<br>handbooks and fliers,<br>customized to local<br>conditions by trained<br>nurses<br>vs.<br><u>CG (n=104):</u><br>usual follow-up care<br><u>Duration:</u> 9 months                                                                                                                          | <u>Primary:</u><br>patients with target<br>HbA1c ( ≤ 7 %)<br><u>Secondary:</u> systolic and<br>diastolic blood pressure,<br>fasting glucose, BMI,<br>waist circumference      | Change over 9 months:<br><u>HbA1c (%):</u><br><ul style="list-style-type: none"> <li>• No difference: 45 % vs. 50 % with target values (p=0.21), MD: 2.88% (-3.85 to -1.92) vs. 2.57% (-3.47 to -1.67)</li> <li>• Benefit with IG: 36 % vs.25 % with target values, MD: -27 ( -45 to -9; p=0.003)</li> </ul>                                                                                                                                                   |

| Study name<br>registration<br>number<br>Design             | Setting<br>Place,<br>setting and<br>time                                  | Inclusion / Exclusion criteria                                                                                                                                                                  | Population<br>Characteristics                                                                                                                                                                                | Intervention vs. Control<br>Description with duration                                                                                                                                                                                                                                                                                                                                                    | Outcomes<br>Primary and secondary                                                                                                                                                                                                                                                                                                                                      | Results<br>Longest follow-up period with<br>intervention effects (IG vs. CG) with<br>SD, 95%-CI or p value                                                                                                                                                                                                                                                                                                                                                                                                                                                                                                                            |
|------------------------------------------------------------|---------------------------------------------------------------------------|-------------------------------------------------------------------------------------------------------------------------------------------------------------------------------------------------|--------------------------------------------------------------------------------------------------------------------------------------------------------------------------------------------------------------|----------------------------------------------------------------------------------------------------------------------------------------------------------------------------------------------------------------------------------------------------------------------------------------------------------------------------------------------------------------------------------------------------------|------------------------------------------------------------------------------------------------------------------------------------------------------------------------------------------------------------------------------------------------------------------------------------------------------------------------------------------------------------------------|---------------------------------------------------------------------------------------------------------------------------------------------------------------------------------------------------------------------------------------------------------------------------------------------------------------------------------------------------------------------------------------------------------------------------------------------------------------------------------------------------------------------------------------------------------------------------------------------------------------------------------------|
| <b>Labhardt<br/>2011</b><br>NCT00744458<br><br>Cluster-RCT | Cameroon<br>rural,<br>primary<br>care,<br><br>08/2008-<br>02/2010         | newly detected adult patients<br>with DM2 and /or<br>hypertension in the<br>catchment area of nurse-led<br>health centres, staffed,<br>equipped and trained to care<br>for DM2 and hypertension | n=33 facilities, 221<br>patients<br>64% females<br>age (yrs): 59.8±12.7<br>diabetes: 15.4 %<br>Overweight (BMI 25-<br>29.9 kg/m <sup>2</sup> ): 28.5 %<br>Obesity<br>(BMI> 30 kg/m <sup>2</sup> ):<br>20.4 % | <u>IG 1 (11 centres, n=55):<br/>incentive group</u><br>free treatment for<br>1 months for patients<br>who regularly attended<br>follow up visits<br>vs.<br><u>IG 2 (11 centres, n=77):<br/>letter group: reminder<br/>letters in case of a missed<br/>follow-up visit<br/>vs.<br/>CG (11 centres, n=89):<br/>no additional<br/>intervention<br/>Duration: 12 months</u>                                  | <u>Primary:</u><br>Patient retention at 1 yr<br>(≥ 12 follow-up visits<br>within 12 months)<br><u>Secondary:</u><br>Adherence with timely<br>attendance of follow-up<br>visit schemes and<br>changes in blood pressure<br>and blood glucose levels.                                                                                                                    | After 12 months:<br><u>Retention rates (%):</u><br>• Benefit for IG1 and IG2 vs.CG: 60 vs. 65<br>vs. 29 %; MD 34 (21 to 46) with no<br>differences between IG1 and IG2; MD -<br>5 (-22 to 12)<br><u>Loss to follow-up:</u><br>• Benefit for IG1 and IG2: IG1 vs. CG: HR<br>0.44 (0.27 to 0.72; p< 0.001)<br>• IG2 vs. CG: HR 0.38 (0.24 to 0.61;<br>p<0.001)<br><u>Adherence (%):</u><br>• Benefit for IG1 and IG2: 38 vs. 35 vs.<br>10; MD 26 (14 to 42), IG1 vs CG: MD<br>28(13 to 37); IG2 vs. CG: MD 25 (13 to<br>37)<br>• no difference between IG1 and IG2:<br>MD 3 (-14 to 20)<br><u>FPG:</u><br>No differences between groups |
| <b>Mash 2014</b><br><br>Cluster RCT                        | South<br>Africa,<br>urban,<br>primary<br>care,<br><br>12/2010<br>-12/2012 | DM2 with any therapy<br>attending community health<br>centres in the working class<br>areas of Cape Town<br>Metropole<br><br>no DM1, dementia, mental<br>illness or acute illness               | n=34 public sector<br>community health<br>centres, 1570<br>patients<br>73.8% females<br>age (yrs): 56.1±11.6<br>HbA1c (%): 9.1±2.3                                                                           | <u>IG (17 health centres,<br/>n=710):</u><br>4 monthly sessions lasting<br>60 min with group<br>education about diabetes<br>topics (understanding<br>diabetes and medication,<br>living a healthy lifestyle<br>and preventing<br>complications), delivered<br>by a health promotion<br>officer vs.<br><u>CG (17 health centres,<br/>n=860):</u><br>usual care: ad hoc advice<br>during consultations and | <u>Primary:</u><br>improvement of diabetes<br>self-care activities (5 %<br>weight loss, and a 1 %<br>reduction in HbA1c level)<br><u>Secondary:</u><br>improved diabetes<br>specific self-efficacy,<br>locus of control, mean<br>blood pressure, mean<br>weight loss, mean waist<br>circumference, mean<br>HbA1c, mean total<br>cholesterol levels, quality<br>of life | After 12 months:<br><u>HbA1c (%):</u><br>No differences: 8.4±2.0 vs. 8.8±2.2;<br>MD <sub>a</sub> : 0.01 (-0.27 to 0.28; p=0.967)<br><u>Adherence (self-care activities):</u><br>No differences in scores of physical<br>activity, use of diet plan or medication,<br>foot care or frequency of smoking<br><u>Quality of life:</u><br>No differences in physical functioning,<br>role or social functioning, mental or<br>general health and pain<br><u>Costs:</u><br>Incremental cost effectiveness ratio:<br>1862 Dollar/ QALY gained                                                                                                |

| Study name<br>registration<br>number<br>Design             | Setting<br>Place,<br>setting and<br>time                                   | Population<br>Inclusion / Exclusion criteria                                                                                                                                                                                                                                                                                                                                                                                                                                                                                                                                                                      | Characteristics                                                                                                                                                                                                                                                                                                                               | Intervention vs. Control<br>Description with duration                                                                                                                                                                                                                                                                                                                                                           | Outcomes<br>Primary and secondary                                                                                                                                                                                                                                     | Results<br>Longest follow-up period with<br>intervention effects (IG vs. CG) with<br>SD, 95%-CI or p value                                                        |
|------------------------------------------------------------|----------------------------------------------------------------------------|-------------------------------------------------------------------------------------------------------------------------------------------------------------------------------------------------------------------------------------------------------------------------------------------------------------------------------------------------------------------------------------------------------------------------------------------------------------------------------------------------------------------------------------------------------------------------------------------------------------------|-----------------------------------------------------------------------------------------------------------------------------------------------------------------------------------------------------------------------------------------------------------------------------------------------------------------------------------------------|-----------------------------------------------------------------------------------------------------------------------------------------------------------------------------------------------------------------------------------------------------------------------------------------------------------------------------------------------------------------------------------------------------------------|-----------------------------------------------------------------------------------------------------------------------------------------------------------------------------------------------------------------------------------------------------------------------|-------------------------------------------------------------------------------------------------------------------------------------------------------------------|
|                                                            |                                                                            |                                                                                                                                                                                                                                                                                                                                                                                                                                                                                                                                                                                                                   |                                                                                                                                                                                                                                                                                                                                               | occasional educational<br>talks in waiting room<br><u>Duration</u> : 12 months                                                                                                                                                                                                                                                                                                                                  |                                                                                                                                                                                                                                                                       |                                                                                                                                                                   |
| <b>Muchiri 2015</b><br><br>RCT                             | South<br>Africa,<br>rural,<br>primary<br>care,<br><br>04/2010-<br>11/2011  | DM2, age 40-70 yrs attending<br>community health centres,<br>HbA1c $\geq$ 8 %, blood sugar<br>levels $\geq$ 10 mmol/l, duration<br>of diabetes $\geq$ 1 yr<br><br>no insulin therapy, pregnant<br>women, full time employed                                                                                                                                                                                                                                                                                                                                                                                       | n=82<br>86.6 % female<br>age (yrs): 59 $\pm$ 7.4<br>BMI(kg/m <sup>2</sup> ): 30.9 $\pm$ 6.9<br>HbA1c (%): 11.1 $\pm$ 2.0<br>duration of diabetes<br>(yrs): 6                                                                                                                                                                                  | <u>IG (n=41)</u> :<br>education materials+ 8<br>weekly group educational<br>sessions about diabetes<br>and nutrition, follow-up<br>sessions+vegetable<br>gardening<br><u>CG (n=41)</u> :<br>education materials<br><u>Duration</u> : 12 months                                                                                                                                                                  | <u>Primary</u> : HbA1c<br><u>Secondary</u> :<br>Other clinical outcomes<br>(BMI, blood pressure and<br>blood lipids), HbA1c,<br>dietary behaviours                                                                                                                    | over 12 months<br><u>HbA1c (%)</u> :<br>no difference: 9.8 $\pm$ 1.92 vs. 10.4 $\pm$ 1.92;<br>MD -0.63 (-0.26 to 1.50; p=0.16)                                    |
| <b>Owolabi 2019</b><br>PACTR201810<br>599931422<br><br>RCT | South Africa<br>urban/rural,<br>primary<br>care<br><br>07/2018-<br>04/2019 | DM, age $\geq$ 18 yrs, DM<br>diagnosed at least in the last<br>6 months, currently receiving<br>treatment at the selected<br>clinics, on stable medication<br>for $\geq$ 3 months prior to<br>recruitment, uncontrolled<br>glycaemic control,<br>in possession of a mobile<br>phone, able to retrieve and<br>read SMSs and willing to<br>receive SMSs<br><br>health or mental conditions<br>that could interfere with the<br>study, pregnant or planning<br>to get pregnant within the<br>next 6 months, debilitated or<br>handicapped in such a way<br>that obtaining<br>anthropometric<br>measurements could be | n=216<br>84.3 % females<br>age (yrs): 60.6 $\pm$ 11.6<br>DM2 (%): 94<br>Treated with oral pills<br>(%): 75.5<br>Duration of DM (yrs):<br>9.1 $\pm$ 7.4<br>Duration of DM<br>treatment<br>(yrs): 8.8 $\pm$ 7.2<br>Hypertension (%):<br>83.0<br>Random blood<br>glucose (mmol/L):<br>14.34 $\pm$ 3.9<br>BMI(kg/m <sup>2</sup> ): 32.2 $\pm$ 6.2 | <u>IG (n=108)</u> :<br>daily SMS text-messaging<br>SMS at an agreed time of<br>the day, according to<br>their needs, care plan and<br>goal with motivational<br>and support messages,<br>advice on lifestyle<br>behaviours (e.g. diets,<br>physical activity, smoking<br>cessation, medication and<br>appointment reminders)<br>vs.<br><u>CG (n=108)</u> :<br>usual diabetes care<br><u>Duration</u> : 6 months | <u>Primary</u> : Morning random<br>blood sugar<br><u>Secondary</u> :<br>co-morbid outcomes<br>(hypertension and<br>obesity), obtained<br>through blood pressure<br>measurement,<br>anthropometric<br>measurements (body<br>weight, BMI)<br>acceptability, feasibility | Over 6 months:<br><u>Blood glucose levels</u> (mmol/L):<br>-1.58 $\pm$ 5.29 vs. -1.95 $\pm$ 4.69; MD 0.51(-<br>0.8 to 1.82), MD <sub>a</sub> 0.26 (-0.81 to 1.32) |

| Study name<br>registration<br>number<br>Design | Setting<br>Place,<br>setting and<br>time                        | Inclusion / Exclusion criteria                                                                                                                                                                                                                                                                                                                                                   | Population<br>Characteristics                                                                                                                                                                                                                     | Intervention vs. Control<br>Description with duration                                                                                                                                                                                                                                                                                                                           | Outcomes<br>Primary and secondary                                                                                                      | Results<br>Longest follow-up period with<br>intervention effects (IG vs. CG) with<br>SD, 95%-CI or p value                                                                          |
|------------------------------------------------|-----------------------------------------------------------------|----------------------------------------------------------------------------------------------------------------------------------------------------------------------------------------------------------------------------------------------------------------------------------------------------------------------------------------------------------------------------------|---------------------------------------------------------------------------------------------------------------------------------------------------------------------------------------------------------------------------------------------------|---------------------------------------------------------------------------------------------------------------------------------------------------------------------------------------------------------------------------------------------------------------------------------------------------------------------------------------------------------------------------------|----------------------------------------------------------------------------------------------------------------------------------------|-------------------------------------------------------------------------------------------------------------------------------------------------------------------------------------|
|                                                |                                                                 | challenging                                                                                                                                                                                                                                                                                                                                                                      |                                                                                                                                                                                                                                                   |                                                                                                                                                                                                                                                                                                                                                                                 |                                                                                                                                        |                                                                                                                                                                                     |
| <b>Sodipo 2017</b><br>RCT                      | Nigeria,<br>primary<br>care,<br><br>03/2013-<br>11/2013         | DM2 ≥ 18 yrs. on antidiabetic<br>medication<br><br>no patients with<br>emergencies, chronic<br>complications such as<br>nephropathy, neuropathy<br>etc., those already using<br>glucometer                                                                                                                                                                                       | n=120<br>gender: 50% female<br>age (yrs): 59±10.95<br>HbA1c (%): 8.7±2.45<br>fasting glucose<br>(mg/dl): 152±60.9<br>duration of diabetes<br>(yrs): 50%> 3yrs                                                                                     | <u>IG (n=60):</u><br>Self-monitoring of blood<br>glucose before and after<br>meals 3 days a week for<br>12 weeks<br><u>CG (n=60):</u> non SMBG<br><u>Duration:</u> 12 wks                                                                                                                                                                                                       | HbA1C, fasting glucose                                                                                                                 | after 3 months:<br><u>HbA1c (%):</u><br>No difference: 7.2±2.0 vs.7.7±2.0 (p=<br>0.174)<br><u>fasting glucose (mg/dl):</u><br>No difference: 123.2±35.1 vs.<br>137.6±50.1 (p=0.087) |
| <b>Steyn 2013</b><br><br>Cluster-RCT           | South<br>Africa,<br>urban,<br>primary<br>care,<br><br>1999-2000 | public sector primary health<br>care clinics (CHC) with ≥ 25<br>diabetes and ≥ hypertension<br>patients<br>age ≥15yrs, a documented<br>attende at the particular<br>CHC with ≥ 4 visits during the<br>previous year for<br>hypertension or diabetes who<br>received treatment for these<br>conditions at each visit<br><br>no patients being unable to<br>answer a questionnaire | 18 community health<br>centres<br>n=1096, of them<br>n= 456 with DM<br>age (yrs): 58.3 ± 11<br>gender:74 % females<br>BMI (kg/m <sup>2</sup> ):<br>30.7 ± 6.2<br>Type of Diabetes:<br>• DM1: 5.8%<br>• DM2: 91.35%<br>uncertain DM type:<br>2.85% | <u>IG (9 clinics, n=229):</u><br>introduction of structured<br>clinical record with<br>guidelines prompts after<br>training of doctors in<br>their use and suggestions<br>to incorporate them in<br>regular patient records,<br>contact over 1 year<br>vs.<br><u>CG (9 clinics, n= 227):</u><br>usual care with passively<br>disseminated guidelines<br><u>Duration:</u> 1 year | <u>primary:</u> HbA1C in the<br>diabetes group<br><u>secondary:</u><br>uncontrolled glycaemia<br>(HbA1c ≥7%) in the<br>diabetes group. | After 3 months:<br><u>HbA1c (%):</u><br>IG: 8.8% vs. 8.8%; MDa -1.0 (-1.1 to -<br>0.9)<br><u>HbA1c ≥7% (%):</u><br>no relevant difference: 64.1 vs. 62.6;<br>MD 0.90 (0.53 to 1.53) |
| <b>Takenga 2014</b><br><br>RCT                 | Congo,<br>urban                                                 | DM2, 35-75 yrs                                                                                                                                                                                                                                                                                                                                                                   | n=40<br>20 % females<br>age (yrs): 53.3 ± 10.1<br>HbA1c (%): 8.63                                                                                                                                                                                 | <u>IG (n=20):</u><br>self-management of<br>diabetes with Mobil DIAB<br>(telemedical approach)<br>vs.<br><u>CG (n=20):</u><br>conventional therapy<br>without telemedical<br>system                                                                                                                                                                                              | <u>primary:</u> HbA1c                                                                                                                  | after 2 months:<br><u>HbA1c (%):</u><br>Benefit for IG: 6.73±1.59 vs. vs.<br>8.6±1.35 (MD -1.87 (-2.91 to -0.83)                                                                    |

| Study name<br>registration<br>number<br>Design            | Setting<br>Place,<br>setting and<br>time                          | Population<br>Inclusion / Exclusion criteria<br>Characteristics                                                                                                                                                                                                                                          | Intervention vs. Control<br>Description with duration                                                                                                                                                                                                                                                                                                                       | Outcomes<br>Primary and secondary                                                                                                                                                                                                   | Results<br>Longest follow-up period with<br>intervention effects (IG vs. CG) with<br>SD, 95%-CI or p value                                                                                                      |                                                                                                                                                                                                                                                                                                                                                                                                                                                                                                                                   |
|-----------------------------------------------------------|-------------------------------------------------------------------|----------------------------------------------------------------------------------------------------------------------------------------------------------------------------------------------------------------------------------------------------------------------------------------------------------|-----------------------------------------------------------------------------------------------------------------------------------------------------------------------------------------------------------------------------------------------------------------------------------------------------------------------------------------------------------------------------|-------------------------------------------------------------------------------------------------------------------------------------------------------------------------------------------------------------------------------------|-----------------------------------------------------------------------------------------------------------------------------------------------------------------------------------------------------------------|-----------------------------------------------------------------------------------------------------------------------------------------------------------------------------------------------------------------------------------------------------------------------------------------------------------------------------------------------------------------------------------------------------------------------------------------------------------------------------------------------------------------------------------|
| <u>Duration: 60 days</u>                                  |                                                                   |                                                                                                                                                                                                                                                                                                          |                                                                                                                                                                                                                                                                                                                                                                             |                                                                                                                                                                                                                                     |                                                                                                                                                                                                                 |                                                                                                                                                                                                                                                                                                                                                                                                                                                                                                                                   |
| <b>Tawfik 2016</b><br><br>RCT                             | Egypt,<br>urban,<br>primary<br>care,<br><br>05/2015-<br>09/2015   | DM2 for $\geq 1$ yr, 40-79 yrs<br>attending an outpatient clinic<br><br>no patients who were already<br>using a similar medication<br>chart, severe or terminal<br>health conditions, or patients<br>with behavioural health issue<br>that could make it difficult to<br>understand the<br>communication | n=255<br>53.7 % females<br>age (yrs): 55.7 $\pm$ 8.35<br>HbA1c (%): 8.14 $\pm$ 1.3<br>duration of diabetes<br>(yrs): 8.3 $\pm$ 1.3                                                                                                                                                                                                                                          | <u>IG (n=127):</u><br>comprehensive<br>cardiovascular risk<br>communication<br>vs.<br><u>CG (n=128):</u><br>standard usual care<br><u>Duration: 3 months</u>                                                                        | <u>Primary:</u> HbA1c<br><u>Secondary:</u><br>Cardiovascular risk<br>perception, diabetes self-<br>care, cardiovascular risk<br>scores                                                                          | After 3 months:<br><u>HbA1c (%):</u><br>Benefit for IG: 7.5 $\pm$ 0.8 vs. 8.12 $\pm$ 0.9;<br>MD -0.62 (-0.85 to -0.39)<br><u>controlled HbA1c (%):</u><br>32.7 vs. 29.9                                                                                                                                                                                                                                                                                                                                                           |
| <b>Thuita 2020</b><br>PACTR201910<br>518676391<br><br>RCT | Kenya<br>Secondary<br>care<br>recruitment<br>08/2016 -<br>10/2016 | DM2, 20-79 yrs with regular<br>attendance of an outpatient<br>clinic<br><br>Pregnancy, complications<br>such as renal failure,<br>congestive heart failure, or<br>stroke                                                                                                                                 | n=153<br>59.5 % females<br>age (yrs). 56 $\pm$ 11.6<br>Family history of DM<br>(%): 46.6<br>Poor glycaemic<br>control (%) with<br>HbA1c>7%: 77.8<br>DM for 1-5 yrs (%):<br>58.2 %<br>Years with DM:<br>6.7 $\pm$ 6.9<br>Oral medications (%):<br>82.4<br>BMP (kg/m <sup>2</sup> ): 27 $\pm$ 4.6<br>HbA1c (%): 8.49 $\pm$ 1.9<br>fasting glucose<br>(mmol/l): 11.0 $\pm$ 3.3 | <u>IG2 (n=51):</u><br>nutrition education<br>programme for 2 hrs<br>/week with peer-to-peer<br>support<br>vs.<br><u>IG1 (n=51):</u><br>Education programme<br>vs.<br><u>CG (n=51):</u><br>Standard care<br><u>Duration: 8 weeks</u> | <u>Primary:</u> metabolic<br>syndrome prevalence<br>(MetS)<br><u>Other:</u> anthropometry<br>and clinical data, blood<br>pressure, blood glucose<br>and lipid profile, physical<br>activity levels, food intake | After 6 months:<br><u>Metabolic syndrome prevalence:</u> lower<br>with IG2:<br>Harmonized criteria: 52.1 vs. 69.4 vs.<br>91.3 (p<0.001)<br>WHO: 58.3 vs. 77.6 vs. 89.1 (p=0.003)<br><u>HbA1c (%):</u><br>Mean change: no differences -<br>2.04 $\pm$ 2.70 vs. 1.48 $\pm$ 2.73 vs. -0.73 $\pm$ 2.71<br>High HbA1c: no differences: 47.9 vs.<br>29.0 vs. 34.8 %<br>fasting glucose (mmol/l):<br>no differences: -2.59 $\pm$ 0.66 vs. -<br>2.95 $\pm$ 0.64 vs. -1.55 $\pm$ 0.68<br>high fasting glucose: 79.2 vs. 83.7 vs.<br>91.3 % |



| Study name<br>registration<br>number<br>Design     | Setting<br>Place,<br>setting and<br>time                                  | Population<br>Inclusion / Exclusion criteria                                                                                                                                                                                                                     | Characteristics                                                                                                                                                                                                                                                                                                                                                             | Intervention vs. Control<br>Description with duration                                                                                                                                                                                                                                                                                                                                   | Outcomes<br>Primary and secondary                                                                                                                                                                                                                                                             | Results<br>Longest follow-up period with<br>intervention effects (IG vs. CG) with<br>SD, 95%-CI or p value                                                                                                                                                                                                                                                                                                                                                                                                                                     |
|----------------------------------------------------|---------------------------------------------------------------------------|------------------------------------------------------------------------------------------------------------------------------------------------------------------------------------------------------------------------------------------------------------------|-----------------------------------------------------------------------------------------------------------------------------------------------------------------------------------------------------------------------------------------------------------------------------------------------------------------------------------------------------------------------------|-----------------------------------------------------------------------------------------------------------------------------------------------------------------------------------------------------------------------------------------------------------------------------------------------------------------------------------------------------------------------------------------|-----------------------------------------------------------------------------------------------------------------------------------------------------------------------------------------------------------------------------------------------------------------------------------------------|------------------------------------------------------------------------------------------------------------------------------------------------------------------------------------------------------------------------------------------------------------------------------------------------------------------------------------------------------------------------------------------------------------------------------------------------------------------------------------------------------------------------------------------------|
| <b>Webb 2015</b><br>NCT01275040<br><br>Cluster RCT | South<br>Africa,<br>urban,<br>primary<br>care,<br><br>06/2010-<br>03/2011 | primary health_care clinics,<br>patients with clinical<br>diagnosis of DM2 or DM1_for<br>≥5yrs, age ≥ 18 yrs                                                                                                                                                     | n= 12 primary health<br>care clinics<br>n= 599<br>gender:68.5 % female<br>age (yrs): 57.8±10.5<br>HbA1c (%): 8.73±2.3<br>HbA1c ≥ 7 %: 73 %<br>BMI (kg/m <sup>2</sup> ):<br>30.8±6.7<br>Typ of diabetes:<br>• DM1: 3.7 %,<br>• DM2: 70.3 %<br>• unknown: 26 %<br>duration of Diabetes:<br>• < 5 yrs: 47.3 %<br>• 5-10 yrs: 22.0 %<br>• > 10 yrs: 20.2 %<br>• unknown: 10.5 % | <b>IG (n=328):</b><br>mobile screening team<br>visits primary care clinic<br>and provides education<br>and active screening for<br>diabetic complications<br>(foot, kidney, cardiac and<br>renal complications)<br>vs.<br><b>CG(n=273):</b><br>no mobile screening<br>team, routine care with<br>similar education for<br>patients. and health care<br>workers<br><b>Duration:</b> 1 yr | <b>Primary:</b> HbA1c, detected<br>neuropathy, nephropathy<br>and retinopathy, HbA1c<br>categories<br><b>Secondary:</b> detected<br>complications, referred<br>patients for complication<br>assessment or care, blood<br>pressure and lipid<br>control, costs, LDL<br>cholesterol, creatinine | after 12 months<br><b>HbA1c (%):</b><br>no difference: 8.54±2.11 vs. 8,76 ±2.2,<br>MD-0.22 (-0.64, 0.20)<br><b>screening rate for complications:</b> in IG<br>60% increase of screening in all<br>complication indicator groups, in both<br>groups testing of HbA1c and renal<br>complications (serum-creatinine)<br>increased , but no significant<br>difference , screening for eye<br>complications, only increased<br>significantly in IG<br>no significant difference in the<br>proportion of actions taken between IG<br>and CG (p=0.83) |
| <b>Strategies to enhance physical activity</b>     |                                                                           |                                                                                                                                                                                                                                                                  |                                                                                                                                                                                                                                                                                                                                                                             |                                                                                                                                                                                                                                                                                                                                                                                         |                                                                                                                                                                                                                                                                                               |                                                                                                                                                                                                                                                                                                                                                                                                                                                                                                                                                |
| <b>Asuako 2017</b><br><br>RCT                      | Ghana,<br>urban,<br>tertiary<br>care,<br><br>08/2015-<br>03/2016          | DM, age: 20-68 yrs, ambulant<br>patients, without diabetes<br>complications with < 150<br>minutes /wk of moderate<br>physical activity<br>no SBP > 140 or DBP> 90<br>mmHg, bilateral or unilateral<br>lower or upper limbs<br>amputation, use of insulin<br>pump | n=12<br>83% female<br>age (yrs): 83% were<br>46-55 yrs.<br>BMI (kg/m <sup>2</sup> ):25.4±4.5<br>fasting glucose<br>(mmol/l):9.33 ± 5.7<br>type of diabetes:<br>DM1: 17 %<br>DM2: 83 %<br>duration of diabetes<br>(yrs):<br>• 1-5 yrs: 25 %<br>• 6-10 yrs: 50 %<br>• 10 yrs: 25 %                                                                                            | <b>IG (n=7):</b><br>walking aerobic exercise<br>sessions without<br>treadmills (3/week)<br>vs.<br><b>CG (n=5):</b><br>only activity of daily living<br><br>Both continued regular<br>medical/clinical routines<br><b>Duration:</b> 8 weeks                                                                                                                                              | FPG, Lipid profile, body<br>weight, BMI                                                                                                                                                                                                                                                       | Change over 2 months:<br><b>FPG (mmol/l):</b><br>Benefit for IG: 6.27 ± 0.91 vs. 8.00 ±<br>0.96; MD 1.73 (-1.88 to -1.59; p<0.001)                                                                                                                                                                                                                                                                                                                                                                                                             |

| Study name<br>registration<br>number<br>Design | Setting<br>Place,<br>setting and<br>time             | Population<br>Inclusion / Exclusion criteria<br>Characteristics                                                                                                                                                                                                                    | Intervention vs. Control<br>Description with duration                                                                                                                                                     | Outcomes<br>Primary and secondary                                                                                                                                                                                                                                  | Results<br>Longest follow-up period with<br>intervention effects (IG vs. CG) with<br>SD, 95%-CI or p value                                                                                                                                                                          |
|------------------------------------------------|------------------------------------------------------|------------------------------------------------------------------------------------------------------------------------------------------------------------------------------------------------------------------------------------------------------------------------------------|-----------------------------------------------------------------------------------------------------------------------------------------------------------------------------------------------------------|--------------------------------------------------------------------------------------------------------------------------------------------------------------------------------------------------------------------------------------------------------------------|-------------------------------------------------------------------------------------------------------------------------------------------------------------------------------------------------------------------------------------------------------------------------------------|
| <b>Fayehun 2018</b>                            | Nigeria,<br>urban<br>06/2014-<br>11/2014             | DM2, age 18-64 yrs,<br>Diagnosed $\geq$ 12 months, non-<br>insulin dependent, on dietary<br>control $\pm$ hypoglycemic<br>agents, able to walk without<br>limitations<br><br>no pregnant women,<br>smokers, prescription of<br>medications that might<br>impair ability to walk    | n= 46<br>63 % female<br>age (yrs): 54 $\pm$ 7.7 (33-<br>64)<br>BMI (kg/m <sup>2</sup> ):<br>22.4 $\pm$ 3.3<br>HbA1c (%): 6.6 (5.3-<br>9.0)<br>duration of diabetes<br>(yrs): <7 yrs: 70 %,<br>>7 yrs 30 % | <u>IG (n=23):</u><br>Goal to accumulate<br>10000 steps per day<br>vs.<br><u>CG (n=23):</u><br>normal activity habits<br><u>Duration:</u> 10 weeks                                                                                                                  | <u>Primary:</u> HbA1c<br><u>Secondary:</u> step count<br><br>Change over 2.5 months:<br><u>HbA1c (%):</u><br>Benefit for IG: 6.26 (6.19 to 6.33) vs.<br>6.82 (6.69 to 6.95); MD <sub>a</sub> : -0.74 (-1.32<br>to -0.02; p=0.015)                                                   |
| <b>Maharaj 2016</b><br><br>RCT                 | Nigeria,<br>rural<br><br>07/2013-<br>06/2014         | DM2, non- insulin dependent,<br>blood glucose levels 6 -<br>13 mmol/l<br><br>no cardiac, abdominal or<br>spinal surgery $\leq$ 6 months,<br>history of fractures of lower<br>limbs, spine, weakness,<br>deformities, loss of sensation<br>in the feet, retinopathy,<br>nephropathy | n=90<br>52 % females<br>age (yrs): 39.4 $\pm$ 8.6<br>(30-58)<br>BMI (kg/m <sup>2</sup> ): 27.7 $\pm$ 5.8<br>HbA1c (%): 8.79 $\pm$ 2.11<br>duration of diabetes<br>(yrs): 2.5 $\pm$ 2.1                    | <u>IG (n=45):</u><br>rebound exercise 3<br>times/week for 20-<br>30 min, moderate<br>intensity of 40-60 % of HR<br>maximum<br>vs.<br><u>CG (n=45):</u><br>watched videos and read<br>health magazines<br><u>Duration:</u> 9 weeks                                  | After 9 weeks<br><u>HbA1c (%):</u><br>Benefit for IG: 7.12 $\pm$ 1.19 vs. 8.36 $\pm$ 1.25;<br>MD <sub>a</sub> : 0.904 (0.832 to 0.984; p=0.017)<br><u>FPG (mmol/l):</u><br>Benefit for IG: 6.92 $\pm$ 1.21 vs. 8.73 $\pm$ 1.23;<br>MD <sub>a</sub> : 0.787 (0.7345- 0.841; p=0.002) |
| <b>van Rooijen 2004</b><br><br>RCT             | South<br>Africa,<br>urban<br><br>03/2002-<br>11/2002 | black women with DM2, age<br>40-65yrs, duration of DM $\geq$ 12<br>months<br><u>no</u> chest pain on effort,<br>possible previous myocardial<br>infarction and intermittent<br>claudication, cerebro-<br>vascular incidents, arthritis,<br>retinopathy                             | n=158<br>gender:100 % females<br>age (yrs): 54-55<br>HbA1c (%): 9.35                                                                                                                                      | <u>IG (n=80):</u><br>education+ incremental<br>daily home exercise, use<br>of daily physical activity<br>records+6 fortnightly<br>supervised aerobic<br>exercise classes<br>vs.<br><u>CG(n=77):</u><br>education+ relaxation<br>exercise<br><u>Duration:</u> 12wks | Change over 3 months:<br><u>HbA1c (%):</u><br>no difference: 8.99 $\pm$ 2.59 vs. 8.26 $\pm$ 1.97                                                                                                                                                                                    |
| <b>Yan 2014</b>                                | Mozambiqu<br>e,                                      | DM2, male, age 40-70 yrs,<br>diagnosis for $\geq$ 12 months                                                                                                                                                                                                                        | n=41<br>100% male                                                                                                                                                                                         | <u>IG (n=31):</u><br>low or vigorous intensity                                                                                                                                                                                                                     | plasma glucose, HbA1c<br>Change over 3 months:<br><u>HbA1c (%):</u>                                                                                                                                                                                                                 |

| Study name<br>registration<br>number<br>Design | Setting<br>Place,<br>setting and<br>time | Population<br>Inclusion / Exclusion criteria                                                                                                                                                                                                                                                                                                                                                                                                                                                                        | Characteristics                                                                                                         | Intervention vs. Control<br>Description with duration                                                                                                                                                                                 | Outcomes<br>Primary and secondary                                                                                                          | Results<br>Longest follow-up period with<br>intervention effects (IG vs. CG) with<br>SD, 95%-CI or p value                                                                                                                                                                             |
|------------------------------------------------|------------------------------------------|---------------------------------------------------------------------------------------------------------------------------------------------------------------------------------------------------------------------------------------------------------------------------------------------------------------------------------------------------------------------------------------------------------------------------------------------------------------------------------------------------------------------|-------------------------------------------------------------------------------------------------------------------------|---------------------------------------------------------------------------------------------------------------------------------------------------------------------------------------------------------------------------------------|--------------------------------------------------------------------------------------------------------------------------------------------|----------------------------------------------------------------------------------------------------------------------------------------------------------------------------------------------------------------------------------------------------------------------------------------|
| RCT                                            | urban                                    | no known diseases other than DM2 and hypertension, no diagnosed cardiovascular diseases                                                                                                                                                                                                                                                                                                                                                                                                                             | age(yrs): 54±2.5<br>HbA1c: 8.6±0.7<br>plasma glucose (mmol/l): 9.65±1.2<br>BMI ( kg/m <sup>2</sup> ): 27.1 ± 1.0        | exercise 3-5 times/week vs.<br><u>CG(n=10):</u><br>walked 1 hour per day as part of their daily lifestyle<br><u>Duration:12 wks</u>                                                                                                   |                                                                                                                                            | reduction in both groups with no differences between groups: 7.7±0.4 vs. 7.7±0.8<br><u>Plasma glucose (mmol/l):</u><br>9.6 ± 0.7 vs. 11.1 ± 1.3                                                                                                                                        |
| <b>Pharmacological strategies</b>              |                                          |                                                                                                                                                                                                                                                                                                                                                                                                                                                                                                                     |                                                                                                                         |                                                                                                                                                                                                                                       |                                                                                                                                            |                                                                                                                                                                                                                                                                                        |
| <b>Distiller 2014</b><br>RCT                   | South Africa                             | DM2 for ≥ 1 year with total insulin requirement of >200 U/d for ≥ 3 months, BMI > 30 kg/m <sup>2</sup> , HbA1c > 7,5 %, on long-term metformin therapy (1.7–2.5 g/d)<br><br>no pregnant or with childbearing potential, endocrinopathy, chronic inflammatory or systematic autoimmune disorder, CVD, active carcinoma, chronic illness, renal dysfunction, gastroparesis, no corticosteroids, DPP-4 inhibitors, exenatide, liraglutide, no anticipated change in other concomitant medication or insulin resistance | n=28<br>50% female<br>age (yrs): 51.7 (36-71)<br>HbA1c (%): 8.95 (7.6-11.3)<br>BMI (kg/m <sup>2</sup> ): 40.8 (31.2-47) | <u>IG (n=14):</u><br>regular Insulin (500 U/ml) + metformin + exenatide (5 µg orally twice a day for 1 month and titrated to 10 µg)<br>vs.<br><u>CG (n=14):</u><br>regular Insulin (500 U/ml) +metformin<br><u>Duration: 6 months</u> | <u>Primary:</u> HbA1c<br><u>Secondary:</u> Body weight, insulin dose, hypoglycemia                                                         | Change to 6 months:<br><u>HbA1c (%):</u><br>Significant improvement in both groups<br>8.7→7.7(p=0.002) vs. 9.2→7.5 (p=0.0001)<br>With no difference between groups (MD: 0.28; p=0.80)<br><u>Complications:</u><br>Mild hypoglycaemia: 5 vs. 2 persons with 20 vs. 5 events (p ≤ 0.001) |
| <b>El-Haggag 2015</b><br>RCT                   | Egypt,<br>urban<br><br>01/2013-04/2014   | DM2, age: 45-55 yrs, obese (BMI≥30 kg/m <sup>2</sup> ), with duration 5-10 yrs, treated with glimepiride alone<br><br>no Inflammatory disease,                                                                                                                                                                                                                                                                                                                                                                      | n=48<br>79 % female<br>age (yrs): 50.1±4.6<br>HbA1c (%): 7.83±0.87<br>fasting glucose (mg/dl): 193±50                   | <u>IG1 (n=16):</u><br>glimepiride (3 mg/d) + 2 (1 mg twice/d)<br>vs.<br><u>IG2 (n=16):</u><br>glimepiride (3 mg/d) +                                                                                                                  | <u>not specified:</u><br>glycemic markers, metabolic markers, adiponectin, interleukin-6, leukotriene B4, mast cell tryptase, lipid panel, | Changes over 12 weeks:<br><u>HbA1c (%):</u><br>• Highest benefit for IG1: 7.1±0.86 vs. 8.2±0.82 vs. 8.7±0.93 (p< 0.05)<br><u>fasting glucose (mg/dl):</u><br>• Highest benefit for IG1: 199±38 vs.                                                                                     |

| Study name<br>registration<br>number<br>Design | Setting<br>Place,<br>setting and<br>time                                  | Population<br>Inclusion / Exclusion criteria                                                                                                                                                                                                                                                                                                                                                                                                                          | Characteristics                                                                                                                                     | Intervention vs. Control<br>Description with duration                                                                                                                                                                                                                | Outcomes<br>Primary and secondary                                                                                | Results<br>Longest follow-up period with<br>intervention effects (IG vs. CG) with<br>SD, 95%-CI or p value                                                                                                                                                                                                                                                                                                   |
|------------------------------------------------|---------------------------------------------------------------------------|-----------------------------------------------------------------------------------------------------------------------------------------------------------------------------------------------------------------------------------------------------------------------------------------------------------------------------------------------------------------------------------------------------------------------------------------------------------------------|-----------------------------------------------------------------------------------------------------------------------------------------------------|----------------------------------------------------------------------------------------------------------------------------------------------------------------------------------------------------------------------------------------------------------------------|------------------------------------------------------------------------------------------------------------------|--------------------------------------------------------------------------------------------------------------------------------------------------------------------------------------------------------------------------------------------------------------------------------------------------------------------------------------------------------------------------------------------------------------|
|                                                |                                                                           | severe hepatic or renal<br>disease, epilepsy<br>pregnant/lactating females                                                                                                                                                                                                                                                                                                                                                                                            | BMI (kg/m <sup>2</sup> ):<br>37.6±4.6<br>duration of diabetes<br>(yrs): 7.7 ±2.6                                                                    | ketotifen (1 mg once/d)<br>vs.<br><u>CG (n=16):</u><br>glimepiride (3 mg/d)<br>alone<br><u>Duration: 12 weeks</u>                                                                                                                                                    | BMI                                                                                                              | 207.7± 47.6 (p< 0.05)                                                                                                                                                                                                                                                                                                                                                                                        |
| <b>Malek 2015</b><br><br>RCT                   | Egypt,<br>Algeria,<br>Tunisia,<br>South Africa<br><br>03/2010-<br>05/2012 | DM2, age ≥ 18 yrs, currently<br>treated with suboptimal dose<br>of oral anti-diabetic drugs;<br>HbA1c 7-11 % (under<br>metformin-monootherapy)<br>and ≤ 10 % (under<br>combination therapy),<br>BMI≤40 kg/m <sup>2</sup><br><br>no allergies or<br>contraindications to the<br>product, pregnant or<br>breastfeeding, impaired<br>hepatic or renal function,<br>cardiovascular history,<br>uncontrolled hypertension,<br>proliferative retinopathy,<br>macular oedema | n=403<br>age (yrs): 52.8±9.6<br>59.8 % female<br>HbA1c (%): 8.65<br>BMI (kg/m <sup>2</sup> ):<br>29.7±4.5<br>duration of diabetes<br>(yrs): 7.5±5.1 | Stepwise individual<br>insulin intensification of<br><u>IG (n=200):</u><br>basal-bolus insulin<br>analogues (insulin<br>detemir +Insulin aspart)<br>vs.<br><u>CG (n=203):</u><br>thrice daily biphasic<br>insulin aspart depending<br>on HbA1c-values over<br>50 wks | <u>Primary:</u><br>HbA1c<br><u>Secondary:</u><br>patients achieving HbA1c<br>< 7.0 %, prandial plasma<br>glucose | Change over 50 weeks:<br><u>HbA1c (%):</u><br>Non-inferiority: 7.4 vs. 7.3; MD 0.1 (-<br>0.1 to 0.3 (full-analysis set), MD 0.2 (-<br>0.1 to 0.4 (per protocol)<br>40.3% and 44.9% achieved<br>HbA1c<7.0%<br><u>Hypoglycaemia (events/patient year):</u><br>9.4 vs. 9.8<br><u>Serious adverse events:</u><br>6.5 vs. 3.4 % with 1 treatment-related<br>SAE in CG<br><u>Adverse events:</u><br>58.5 vs. 63.1% |
| <b>Strategies on food supplementation</b>      |                                                                           |                                                                                                                                                                                                                                                                                                                                                                                                                                                                       |                                                                                                                                                     |                                                                                                                                                                                                                                                                      |                                                                                                                  |                                                                                                                                                                                                                                                                                                                                                                                                              |

| Study name<br>registration<br>number<br>Design | Setting<br>Place,<br>setting and<br>time                     | Population<br>Inclusion / Exclusion criteria                                                                                                                                                                                                                                                                                                                                                                                                                                                                                                   | Characteristics                                                                                                                                                                                                                      | Intervention vs. Control<br>Description with duration                                                                                                                                                                                                                                                                                                                                                              | Outcomes<br>Primary and secondary                                                                                                                                                                                                                                  | Results<br>Longest follow-up period with<br>intervention effects (IG vs. CG) with<br>SD, 95%-CI or p value                                                                                                                                                                                                                                                                                                                             |
|------------------------------------------------|--------------------------------------------------------------|------------------------------------------------------------------------------------------------------------------------------------------------------------------------------------------------------------------------------------------------------------------------------------------------------------------------------------------------------------------------------------------------------------------------------------------------------------------------------------------------------------------------------------------------|--------------------------------------------------------------------------------------------------------------------------------------------------------------------------------------------------------------------------------------|--------------------------------------------------------------------------------------------------------------------------------------------------------------------------------------------------------------------------------------------------------------------------------------------------------------------------------------------------------------------------------------------------------------------|--------------------------------------------------------------------------------------------------------------------------------------------------------------------------------------------------------------------------------------------------------------------|----------------------------------------------------------------------------------------------------------------------------------------------------------------------------------------------------------------------------------------------------------------------------------------------------------------------------------------------------------------------------------------------------------------------------------------|
| <b>Ali 2019</b><br><br>RCT                     | Egypt<br>Urban,<br>tertiary care<br><br>09/2017 –<br>04/2018 | DM2, oral antidiabetic agents<br>with no change of type and<br>dosage of antidiabetic agents<br>in the past 3 months, ≥ 30<br>years<br><br>insulin-dependence,<br>pregnancy, lactation, use of<br>Ca, multivitamins, Vitamin D<br>supplements, use of drugs<br>that affect Vitamin D status,<br>dietary Ca intake > 1500<br>mg/d, hypo- or<br>hyperthyroidism,<br>smoking, use of antiepileptic<br>drugs, sarcoidosis,<br>tuberculosis, potentially<br>terminal illness, inflammatory<br>bowel disease, liver or kidney<br>disease, malignancy | n=85<br>age (yrs): 54.6 ±2.8<br>68 % females<br>BMI (kg/m <sup>2</sup> ): 28.6±3.3<br>Diabetic duration<br>(yrs): 4.4±2.1<br>fasting glucose<br>(mg/dL): 168±54.4<br>fasting serum insulin<br>(μIU/mL): 18.1±8.3<br>HbA1c(%):8.8±1.8 | oral antidiabetic agents<br>as usual +<br><u>IG 1 (n=22):</u><br>continuous oral Vitamin<br>D3 (4000 IU/ d)<br>vs.<br><u>IG 2 (n=22):</u><br>intermittent regimen of<br>Vitamin D3 (50 000 IU/<br>week)<br>vs.<br><u>IG 3 (n=21):</u><br>single IM injection of<br>300 000 IU of Vitamin D3<br>at the start of the study<br>vs.<br><u>CG (n=20):</u> only oral<br>antidiabetic agents<br><u>Duration:</u> 3 months | Not specified: serum<br>creatinine, blood urea<br>nitrogen, total and<br>ionized Ca, serum<br>phosphorus, fasting<br>glucose, fasting<br>serum insulin, 25(OH)D3<br>levels, HbA1c                                                                                  | After 3 months:<br><u>fasting glucose</u> (mg/dL): higher<br>decrease in IG1 and IG2: -20.9±18.1 vs.<br>-23.0±37.9 vs. -3.5±6.9 vs. 1.0±5.6<br>(p<0.001)<br><u>fasting serum insulin</u> (μIU/mL): higher<br>decrease in IG1 and IG2: -4.44±5.2 vs.-<br>5.88±4.6 vs. -1.55±9.4 vs. 0.10±1.0<br>(p< 0.001)<br><u>HbA1c (%)</u> :higher decrease in IG1 and<br>IG2: -0.81±0.77 vs. -0.82±0.87 vs. -<br>0.34±1.47 vs. 0.05±0.08 (p<0.001) |
| <b>Anderson<br/>2001</b><br><br>RCT            | Tunesia,<br>urban                                            | DM2 ≥ 5y, age< 65 yrs,<br>fasting glucose > 8 mmol/l<br>and HbA1C > 7.5 %<br><br>no pregnant or lactating<br>women, receiving trace<br>element supplements in past<br>3 months, with gastric or<br>diuretic treatment, acute<br>renal, acute infection or<br>recent surgery                                                                                                                                                                                                                                                                    | n=110<br>age (yrs): 53.2 ±16.8<br>BMI (kg/m <sup>2</sup> ):<br>29.1±1.0<br>HbA1c (%):8.82±3.25<br>fasting glucose<br>(mmol/l): 11.45±0.<br>83<br>duration of diabetes<br>(months): 73.6±66                                           | <u>IG 1 (n=27):</u><br>Zinc (30 mg/d)<br>vs.<br><u>IG 2 (n=27):</u><br>Chromium (400 μg/d)<br>vs.<br><u>IG 3 (n=27):</u><br>Zinc (30 mg /d) +<br>Chromium (400 μg /d)<br>vs.<br><u>CG (n=29):</u><br>placebo<br><u>Duration:</u> 6 months                                                                                                                                                                          | Not specified:<br>HbA1C, fasting glucose<br>plasma concentrations of<br>zinc, copper, selenium,<br>urinary chromium and<br>zinc, Plasma<br>thiobarbituric acid<br>reactive substances,<br>copper-zinc-superoxid<br>dismutase, selenium -<br>glutathione peroxidase | Change over 6 months:<br><u>HbA1c (%)</u> :<br>7.7±1.6 vs. 7.4±1.4 vs. 8.1±1.6<br>CG: not reported                                                                                                                                                                                                                                                                                                                                     |
| <b>Anyanwu<br/>2016</b>                        | Nigeria,<br>urban                                            | DM2, age 35-65 yrs on oral<br>antidiabetics with vitamin D                                                                                                                                                                                                                                                                                                                                                                                                                                                                                     | n=42<br>57.6 % female                                                                                                                                                                                                                | <u>IG (n=21):</u><br>Vitamin D3 supplements                                                                                                                                                                                                                                                                                                                                                                        | <u>Primary:</u> HbA1c<br><u>Other:</u> fasting glucose,                                                                                                                                                                                                            | Changes over 12 wks:<br><u>HbA1c (%)</u> :                                                                                                                                                                                                                                                                                                                                                                                             |

| Study name<br>registration<br>number<br>Design | Setting<br>Place,<br>setting and<br>time         | Population<br>Inclusion / Exclusion criteria<br>Characteristics                                                                                                                                                                                                                                                                                                                                                                                                                                                                                                                                                                 | Intervention vs. Control<br>Description with duration                                                                                                                                       | Outcomes<br>Primary and secondary                                                                                                                                                              | Results<br>Longest follow-up period with<br>intervention effects (IG vs. CG) with<br>SD, 95%-CI or p value |                                                                                                                                                                                                                                                                                                                                                                                                            |
|------------------------------------------------|--------------------------------------------------|---------------------------------------------------------------------------------------------------------------------------------------------------------------------------------------------------------------------------------------------------------------------------------------------------------------------------------------------------------------------------------------------------------------------------------------------------------------------------------------------------------------------------------------------------------------------------------------------------------------------------------|---------------------------------------------------------------------------------------------------------------------------------------------------------------------------------------------|------------------------------------------------------------------------------------------------------------------------------------------------------------------------------------------------|------------------------------------------------------------------------------------------------------------|------------------------------------------------------------------------------------------------------------------------------------------------------------------------------------------------------------------------------------------------------------------------------------------------------------------------------------------------------------------------------------------------------------|
| RCT                                            |                                                  | deficiency and poor glycemic control (HbA1c > 6.5 %)<br><br>no patients on insulin, pregnancy, renal insufficiency, chronic liver disease or alanine transferase > 5 times upper reference limit, tuberculosis, diarrheal, or malabsorption state                                                                                                                                                                                                                                                                                                                                                                               | age (yrs): 51.8±2.05<br>HbA1c (%): 7.88<br>fasting glucose (mg/dl): 152.8±56.5                                                                                                              | (3000 IU/d)<br>vs.<br><u>CG(n=21):</u><br>placebo<br><u>Duration:</u> 12 weeks                                                                                                                 | levels of serum Vitamin D, calcium, albumin, phosphate, creatinine, and alanine transaminase               | <ul style="list-style-type: none"> <li>MD (IG vs. CG): -0.66 (-0.161 to 0.29) vs 0.38 (-0.08 to 0.84);</li> <li>MD: -1.04 (-2.09 to 0.01)</li> <li>change from poor glycemic control (HbA1c&gt;6.5 %) to normal HbA1c (%): benefit for IF: 33.3 vs. -9.1 (p&lt;0.05)<br/><u>fasting glucose (mg/dl):</u> 137.2±33.6 vs. 154±67.5<br/><u>patient adherence</u> (tablet counts, %): 62.2 vs. 59.9</li> </ul> |
| <b>El Gayar 2019</b><br><br>RCT                | Egypt, urban, outpatients<br><br>01/2017-01/2018 | DM2 for < 6 months, 30-60 yrs, HbA1c level < 9%, BMI≥30 kg/m <sup>2</sup><br><br>no insulin therapy, any injectable or oral antidiabetic medication other than metformin, no smoking, consumption of alcohol or narcotic drugs, no acute illnesses at the baseline or during the study, no pregnancy or lactation, autoimmune disorder, cardiac or renal diseases, thyroid, chronic inflammatory diseases, peptic ulcer, regular consumption of ginger or other herbal drugs, hypersensitivity to ginger, consumption of lipid lowering drugs or oral contraceptive pills or any supplements 2 months before starting the study | n=80<br>49 % female<br>age (yrs): 46.2 ± 9.1<br>HbA1c (%): 8.04±0.5<br>fasting glucose (mg/dl): 176.9±18.3<br>Fasting serum insulin (mIU/L): 19.3±3.3<br>BMI (kg/m <sup>2</sup> ): 32.3±1.4 | diet, physical activity, and metformin<br><u>IG (n=40):</u><br>ginger powder supplementation (600 mg/capsule, 3 capsules/d)<br>vs.<br><u>CG (n=40):</u><br>Placebo<br><u>Duration:</u> 8 weeks | <u>Not specified:</u> glycemic status, lipid profile and beta-cell function                                | After 8 wks:<br><u>HbA1c (%):</u><br>decrease in both groups to 6.94±0.38 vs. 7.26±0.45<br><u>Fasting serum insulin (mIU/L):</u><br>decrease in both groups to 12.86±2.59 vs. 13.21±2.08<br><u>fasting glucose (mg/dl):</u><br>decrease in both groups to 120.88±9.06 vs. 151.70±13.23                                                                                                                     |

| Study name<br>registration<br>number<br>Design | Setting<br>Place,<br>setting and<br>time                     | Population<br>Inclusion / Exclusion criteria                                                                                                                                                                                                                                                                                                                                                                                                                                                                                                                       | Characteristics                                                                                                                                         | Intervention vs. Control<br>Description with duration                                                                                                                                                                | Outcomes<br>Primary and secondary                                                                                                                                                                                                                   | Results<br>Longest follow-up period with<br>intervention effects (IG vs. CG) with<br>SD, 95%-CI or p value                                                                                                 |
|------------------------------------------------|--------------------------------------------------------------|--------------------------------------------------------------------------------------------------------------------------------------------------------------------------------------------------------------------------------------------------------------------------------------------------------------------------------------------------------------------------------------------------------------------------------------------------------------------------------------------------------------------------------------------------------------------|---------------------------------------------------------------------------------------------------------------------------------------------------------|----------------------------------------------------------------------------------------------------------------------------------------------------------------------------------------------------------------------|-----------------------------------------------------------------------------------------------------------------------------------------------------------------------------------------------------------------------------------------------------|------------------------------------------------------------------------------------------------------------------------------------------------------------------------------------------------------------|
| <b>El-Sheikh<br/>2019</b><br><br>RCT           | Egypt,<br>urban                                              | DM2 on glimepiride alone,<br>age ≥30 yrs<br><br>no insulin sensitizers,<br>steroids, NSAIDs, warfarin or<br>lipid lowering medications,<br>thyroid hormones, valproic<br>acid or suffered from: acute<br>or chronic inflammatory<br>diseases, end-stage renal<br>disease undergoing dialysis,<br>hypothyroidism epilepsy,<br>pregnant and breast-feeding<br>women                                                                                                                                                                                                  | n= 72<br>67 % female<br>age (yrs): 50.6±8.7<br>HbA1c (%):9.76±1<br><br>fasting glucose<br>(mg/dl):194.84±20.8<br>BMI (kg/m <sup>2</sup> ):<br>34.4±5.45 | <u>IG (n=38):</u><br>glimepiride 2 mg twice<br>daily + L-carnitine 1 gm<br>twice daily<br>vs.<br><u>CG (n=34):</u><br>glimepiride dose 2 mg<br>twice daily<br><u>Duration:</u> 6 months                              | HbA1c, fasting glucose,<br>PPBG, fasting insulin,<br>extracellular part of<br>insulin regulated<br>aminopeptidase, tumor<br>necrosis factor-alpha,<br>visfatin and lipid panel,<br>BMI and homeostasis<br>model assessment of<br>insulin resistance | Change over 6 months:<br><u>HbA1c (%)</u> :<br>Benefit for IG: 7.41±0.5 vs. 9.5±0.78<br>(p<0.001)<br><u>fasting glucose (mg/dl)</u> :<br>Benefit for IG: 179.6±9.3 vs.<br>192.41±27.4 (p=0.018)            |
| <b>Matter 2020</b><br>NCT03851055<br><br>RCT   | Egypt,<br>urban,<br>outpatients<br><br>08/2017 to<br>08/2018 | DM, treated with insulin, 10<br>to 18 yrs, transfusion<br>dependent beta-thalassemia<br>major<br><br>no other hemoglobinopathies<br>(e.g. a-thalassemia or sickle<br>thalassemia, disorders that<br>may affect glucose<br>homeostasis other than b-<br>TM, autoimmune diseases,<br>collagen diseases, hypo- or<br>hyperthyroidism, infections,<br>or tumours, or those who<br>were taking any vitamins or<br>food supplements < 1 month<br>before the study and<br>participating in a previous<br>investigational drug<br>study within 3 mo preceding<br>screening | n=80<br>52.5% females<br>age (yrs): 16.3±1.4<br>(range 12-18)<br>fasting glucose<br>(mg/dL): 144.5±22.4                                                 | diet schedule with<br>optimal macronutrient<br>distribution and<br>pharmacologic treatment<br><u>IG (n=40):</u><br>zinc gluconate<br>(2x20 mg/d)<br>vs.<br><u>CG (n=40):</u><br>placebo<br><u>Duration:</u> 3 months | <u>Primary:</u> fasting glucose<br><u>Secondary:</u> fructosamine,<br>fasting C-peptide, and<br>HOMA-IR<br><u>safety:</u> any AEs (e.g.<br>nausea, vomiting,<br>abdominal pain, diarrhea,<br>constipation, and<br>reduction of appetite)            | After 12 wks:<br>fasting glucose (mg/dL):<br>higher decrease with IG to 116.9±4.6<br>vs. 144.5±22.9 (p<0.001)<br><u>HbA1c (%)</u> :<br>higher in IG (no results reported)<br>no side effects were reported |
| <b>Moustafa</b>                                | Egypt,                                                       | DM2, newly diagnosed                                                                                                                                                                                                                                                                                                                                                                                                                                                                                                                                               | n=62                                                                                                                                                    | <u>IG (n=29, 21 analysed):</u>                                                                                                                                                                                       | Glycemic control,                                                                                                                                                                                                                                   | After 3 months:                                                                                                                                                                                            |

| Study name<br>registration<br>number<br>Design | Setting<br>Place,<br>setting and<br>time                           | Population<br>Inclusion / Exclusion criteria<br>Characteristics                                                                                                                                                                                                                                                        | Intervention vs. Control<br>Description with duration                                                                                                                                                          | Outcomes<br>Primary and secondary                                                                                                                                                                                                     | Results<br>Longest follow-up period with<br>intervention effects (IG vs. CG) with<br>SD, 95%-CI or p value                                                  |                                                                                                                                                                                                                                                                                                                                                                                                                                                                                                                                                                                                                                                                  |
|------------------------------------------------|--------------------------------------------------------------------|------------------------------------------------------------------------------------------------------------------------------------------------------------------------------------------------------------------------------------------------------------------------------------------------------------------------|----------------------------------------------------------------------------------------------------------------------------------------------------------------------------------------------------------------|---------------------------------------------------------------------------------------------------------------------------------------------------------------------------------------------------------------------------------------|-------------------------------------------------------------------------------------------------------------------------------------------------------------|------------------------------------------------------------------------------------------------------------------------------------------------------------------------------------------------------------------------------------------------------------------------------------------------------------------------------------------------------------------------------------------------------------------------------------------------------------------------------------------------------------------------------------------------------------------------------------------------------------------------------------------------------------------|
| <b>2019</b><br><br>RCT                         | urban,<br>outpatients<br><br>recruitment<br>02/2016-<br>03/2018    | (within a time duration ≤6<br>months), 18–60 yrs<br><br>other antidiabetic<br>medications, pregnant and<br>lactating women, major<br>organ dysfunction (hepatic<br>failure, active hepatitis, liver<br>cirrhosis or renal<br>complications), changed their<br>standard medications during<br>the 12 weeks of the study | 72% females<br>HbA1c(%): 7.51±1.4<br>fasting glucose<br>(mg/dl): 154.4±51.6<br>BMI(kg/m <sup>2</sup> ): 33.9±6.1<br>family history of DM<br>(%): 78.5<br>retinopathy/altered<br>vision (%): 53<br>GDM (%): 9.2 | nigella sativa oil capsules<br>(3x 450 mg/d)<br>vs.<br><u>CG (n=33, 23 analysed):</u><br>metformin (2000 mg/d)<br><u>Duration:</u> 3 months                                                                                           | oxidative stress markers,<br>biochemical parameters,<br>weight/BMI/waist<br>circumference, total<br>antioxidant capacity TAC                                | <u>HbA1c (%)</u> :<br>no difference: 7.01±0.83 vs. 6.55±0.72<br><u>fasting glucose (mg/dl)</u> :<br>no difference: 119.8±23.7 vs.<br>120.7±25.4<br><u>Complications</u> :<br>no differences in occurrence of chills,<br>sweating, tachycardia, lethargy/<br>weakness, polydipsia, polyuria, dry<br>skin, polyphagia, blurred vision, foot<br>problems, or tingling/numbness<br>foot problems lower in IG: 4.8% vs.<br>33.3%, (p = 0.025).                                                                                                                                                                                                                        |
| <b>Ragheb 2020</b><br>NCT03437902<br><br>RCT   | Egypt,<br>urban,<br>outpatients<br>care<br><br>02/2019-<br>05/2018 | DM2, receiving standard oral<br>hypoglycemic agents,<br>≥ 35 yrs,<br><br>no history of overt vascular<br>disease, renal or hepatic<br>failure or antioxidant<br>supplementation or insulin<br>therapy, no change of oral<br>hypoglycemic drugs                                                                         | n=70<br>age (yrs): 54.9±8.4<br>70 % females<br>BMI (kg/m <sup>2</sup> ): 32.5±5.7<br>HbA1c(%): 8.50±1.86<br>fasting glucose<br>(mg/dl): 142.8±52.6                                                             | <u>IG2 (n=20):</u><br>Rutin (60) + vitamin C<br>(160 mg) 3x daily vs.<br><u>IG1 (n=20):</u><br>Vitamin C (500 mg) 1x<br>daily<br>vs.<br><u>CG (n=13):</u><br>only usual<br>oral antidiabetic<br>treatment<br><u>Duration:</u> 8 weeks | <u>Primary:</u> HbA1c,<br>oxidative stress marker,<br>antioxidant capacity,<br>insulin resistance, lipid<br>profile<br><u>Secondary:</u><br>Quality of life | After 2 months:<br><u>HbA1c (%)</u> :<br>no difference 7.494 ± 1.72 vs. 8.504 ±<br>2.059 vs. 8.504 ± 2.059 (p=0.1882)<br><u>fasting glucose (mg/dl)</u> :<br>lower in IG2 and CG: 111.3 (IQR 93.3-<br>135.2) vs. 144 (114.8-201) vs. 113.3<br>(94-152.2) (p=0.017)<br><u>Quality of life (SF 36)</u> :<br>• Benefit of physical functioning and<br>energy domains in IG2 vs. CG<br>(p=0.0049, p=0.0253).<br>• Benefit of role limitation to physical<br>health and emotional improved in<br>IG1 vs. CG (p=0.0267, p=0.0280)<br>• no difference between groups in<br>the other domains (emotional well-<br>being, social functioning, pain and<br>general health) |



| Study name<br>registration<br>number<br>Design             | Setting<br>Place,<br>setting and<br>time             | Population<br>Inclusion / Exclusion criteria                                                                                                                                                                                                                                                                                                                              | Characteristics                                                                                                                                                                                                                                                        | Intervention vs. Control<br>Description with duration                                                                                                                                                                                                                                           | Outcomes<br>Primary and secondary                                                                                                                                                                                                 | Results<br>Longest follow-up period with<br>intervention effects (IG vs. CG) with<br>SD, 95%-CI or p value                                                                                                                                                                                |
|------------------------------------------------------------|------------------------------------------------------|---------------------------------------------------------------------------------------------------------------------------------------------------------------------------------------------------------------------------------------------------------------------------------------------------------------------------------------------------------------------------|------------------------------------------------------------------------------------------------------------------------------------------------------------------------------------------------------------------------------------------------------------------------|-------------------------------------------------------------------------------------------------------------------------------------------------------------------------------------------------------------------------------------------------------------------------------------------------|-----------------------------------------------------------------------------------------------------------------------------------------------------------------------------------------------------------------------------------|-------------------------------------------------------------------------------------------------------------------------------------------------------------------------------------------------------------------------------------------------------------------------------------------|
| <b>Rashad 2017</b><br><br>RCT                              | Egypt,<br>urban                                      | DM2, 50-62 yrs<br><br>no insulin medication,<br>allergies, recent thromboses<br>or uncontrollable<br>hypertension                                                                                                                                                                                                                                                         | n=34<br>43.3 % female<br>age (yrs): 55.5±6.15<br>HbA1c (%):6.75±1.2<br>fasting glucose<br>(mmol/l): 8.5±1.4<br>postprandial plasma<br>glucose(mmol/l):<br>15.6±3.3<br>BMI (kg/m <sup>2</sup> ):28.55±4<br>type of diabetes<br>duration of diabetes<br>(yrs): 6.1 ± 2.2 | <u>IG (n=17):</u><br>Balanites aegyptiaca<br>extract (400 mg))<br>vs.<br><u>CG: (n=17)</u><br>placebo capsules (potato<br>maltodextrin)<br><u>Duration: 8 wks</u>                                                                                                                               | glycemic markers, lipid<br>profile, FPG                                                                                                                                                                                           | Change over 8 wks:<br><u>2h postprandial plasma glucose:</u><br>benefit for IG :26.88% decrease vs. CG<br>2.6% increase<br><u>FPG (mmol/l):</u><br>benefit for IG: 7.8 ± 0.9 vs. CG: 8.5 ±<br>1.1                                                                                         |
| <b>Somanah<br/>2012</b><br>NCT01248143<br><br>RCT          | Mauritius,<br>urban/rural<br><br>11/2010-<br>03/2011 | newly diagnosed DM, age 25–<br>60 yrs fasting glucose range:<br>5.1–5.9 mmol/L<br><br>no secondary complications,<br>non-smoker or stopped for ><br>6 months , alcoholic<br>consumption < 2 standard<br>drinks/day, post-menopausal<br>women without hormone<br>replacement treatment, no<br>glucose-lowering,<br>cholesterol-lowering or anti-<br>hypertension treatment | n=127<br>47% female<br>age (yrs): range 25–60<br>HbA1c (%): 5.99±0.4<br>fasting glucose<br>(mg/dL): 93.2±8.0<br>BMI (kg/m <sup>2</sup> ): 26.6 ±<br>3.7                                                                                                                | <u>IG (n=44):</u><br>supplementation of a<br>fermented papaya<br>preparation (6g/d twice<br>daily, over 12 wks),<br>followed by a 2 week<br>wash out period with the<br>same amount of water<br>vs.<br><u>CG (n=56):</u> consumed an<br>equivalent amount of<br>water<br><u>Duration: 14wks</u> | HbA1C fasting glucose,<br>Lipid profile, diet score,<br>blood pressure, alanine<br>aminotransferase;<br>aspartate<br>aminotransferase,<br>Ferritin, c-reactive<br>protein, uric acid,<br>microalbumin/urinary<br>creatinine ratio | After 14 wks:<br><u>HbA1c (%):</u><br>no difference (p=0.448)<br><u>fasting glucose (mg/dL):</u><br><ul style="list-style-type: none"> <li>remained relatively unchanged in<br/>both genders:</li> <li>males: 96.2±17.0 vs. 87.6±11.7</li> <li>females: 95.6±15.8 vs. 94.3±5.0</li> </ul> |
| <b>Strategies on treatment of DM related complications</b> |                                                      |                                                                                                                                                                                                                                                                                                                                                                           |                                                                                                                                                                                                                                                                        |                                                                                                                                                                                                                                                                                                 |                                                                                                                                                                                                                                   |                                                                                                                                                                                                                                                                                           |

| Study name<br>registration<br>number<br>Design        | Setting<br>Place,<br>setting and<br>time                        | Population<br>Inclusion / Exclusion criteria                                                                                                                                                                                                                                                                                                                                                                                                                                                                                                                                                                                                                                               | Characteristics                                                                                                                                                                       | Intervention vs. Control<br>Description with duration                                                                                                                                                                                                                                                                                                           | Outcomes<br>Primary and secondary                                                                               | Results<br>Longest follow-up period with<br>intervention effects (IG vs. CG) with<br>SD, 95%-CI or p value                      |
|-------------------------------------------------------|-----------------------------------------------------------------|--------------------------------------------------------------------------------------------------------------------------------------------------------------------------------------------------------------------------------------------------------------------------------------------------------------------------------------------------------------------------------------------------------------------------------------------------------------------------------------------------------------------------------------------------------------------------------------------------------------------------------------------------------------------------------------------|---------------------------------------------------------------------------------------------------------------------------------------------------------------------------------------|-----------------------------------------------------------------------------------------------------------------------------------------------------------------------------------------------------------------------------------------------------------------------------------------------------------------------------------------------------------------|-----------------------------------------------------------------------------------------------------------------|---------------------------------------------------------------------------------------------------------------------------------|
| <b>El-Makaky<br/>2020</b><br>NCT03783845<br><br>RCT   | Egypt,<br>urban/rural<br><br>recruited<br>06/2015 to<br>03/2016 | DM2 for >5 yrs, 40-70 yrs,<br>HbA1c 7 to 9% at the last<br>medical evaluation, no<br>change in diabetes treatment<br>over the previous 3 months, ≥<br>6 permanent teeth excluding<br>third molars, clinical<br>attachment level and pocket<br>depth ≥4 mm in >30 % of the<br>sites, diagnosis of chronic<br>periodontitis based on the<br>presence of 4 teeth as a<br>minimum with ≥ 1 site<br><br>Pregnancy, alcoholism and<br>smoking, Presence of any<br>systemic disorders other than<br>hypertension and<br>diabetes, diabetic major<br>complications, antimicrobial<br>therapies or periodontal<br>therapies in the last 6<br>months, allergy to<br>metronidazole and<br>amoxicillin | n=88<br>56.8 % females<br>age (yrs): 52.6±6.8<br>HbA1c (%): 8.16±0.72                                                                                                                 | <u>IG (n=44):</u><br>immediate periodontal<br>therapy: one-stage<br>scaling and root planning,<br>a combination of<br>systemic antibiotics<br>(amoxicillin 500 mg and<br>metronidazole 400 mg<br>3x/day for 2 weeks), and<br>oral hygiene instructions<br>vs.<br><u>CG(n=44):</u><br>delayed periodontal<br>therapy after 3 months<br><u>Duration: 3 months</u> | <u>Primary:</u> HbA1c<br><u>Secondary:</u> not named                                                            | After 3 months:<br><u>HbA1c (%)</u> :<br>benefit for IG: 7.27±0.5 vs. 8.34±0.64:<br>MD -1.07 (-1.32 to -0.83)                   |
| <b>El-Sharkawy<br/>2016</b><br>NCT02794506<br><br>RCT | Egypt,<br>urban<br><br>06/2014-<br>03/2015.                     | DM2 >5 yrs, >20 teeth,<br>chronic moderate or severe<br>periodontitis with probing<br>depth and clinical attachment<br>level >5 mm, bleeding by<br>probing, on oral<br>hypoglycemic drug therapy<br>> 6 months,<br><br>no smoking, use of                                                                                                                                                                                                                                                                                                                                                                                                                                                  | n=50<br>34% female<br>age (yrs): 50.5 ± 7.4<br>(38 to 63)<br>HbA1c (%): 8.66 ±0.73<br>FPG (mg/dl): 183.5<br>±12.547<br>BMI (kg/m <sup>2</sup> ): 26.9±<br>3.1<br>duration of diabetes | <u>IG (n=24):</u> scaling and<br>root planing (SRP)+<br>400mg oral Propolis once<br>daily<br>vs.<br><u>CG (n=26)</u> scaling and<br>root planing<br>(SRP)+Placebo<br><u>Duration: 6 months</u>                                                                                                                                                                  | <u>Primary:</u> HbA1c<br><u>Secondary:</u> FPG,<br>serum N-(carboxymethyl)<br>lysine, periodontal<br>parameters | after 6 months<br><u>HbA1c (%)</u><br>Benefit for IG 7.75± 0.48 vs. 8.5±0.73<br>(p<0.01)<br><u>FPG(mg/dl)</u><br>Benefit for IG |

| Study name<br>registration<br>number<br>Design | Setting<br>Place,<br>setting and<br>time | Population<br>Inclusion / Exclusion criteria                                                                                                                                                                                                                                                                                                                                         | Characteristics                                                                                      | Intervention vs. Control<br>Description with duration                                                                                                                                                                                                  | Outcomes<br>Primary and secondary                                                                             | Results<br>Longest follow-up period with<br>intervention effects (IG vs. CG) with<br>SD, 95%-CI or p value                                                                                                                                                                                  |
|------------------------------------------------|------------------------------------------|--------------------------------------------------------------------------------------------------------------------------------------------------------------------------------------------------------------------------------------------------------------------------------------------------------------------------------------------------------------------------------------|------------------------------------------------------------------------------------------------------|--------------------------------------------------------------------------------------------------------------------------------------------------------------------------------------------------------------------------------------------------------|---------------------------------------------------------------------------------------------------------------|---------------------------------------------------------------------------------------------------------------------------------------------------------------------------------------------------------------------------------------------------------------------------------------------|
|                                                |                                          | antibiotics, non-steroidal or anti-inflammatory drugs within the last 3 months, periodontal therapy ≤ 1 year, retinopathy grade 3/4, pregnancy, no contraceptive drugs                                                                                                                                                                                                               | (yrs): 8.1 ± 3.9<br>hypertension: 4.5%<br>neuropathy: 1.5%<br>retinopathy: 0.5%<br>nephropathy: 0%   |                                                                                                                                                                                                                                                        |                                                                                                               |                                                                                                                                                                                                                                                                                             |
| <b>Ghoneim 2013</b><br><br>RCT                 | Egypt,<br><br>03/2010-<br>03/2012        | DM, duration ≥ 15 yrs, bilateral diabetic macular edema (≥ 6 months)<br><br>no prior treatment with intravitreal corticosteroids, peribulbar steroid injection within ≤ 6 months, pars plana vitrectomy, history of glaucoma or steroid induced IOP elevation, ischemic maculopathy, foveal tracted, IOP ≥ 23 mmHg                                                                   | n=19 (38 eyes)<br>89.5 % female<br>age (yrs): 52.3±11.4                                              | <u>IG (n=19):</u><br>one eye with 8 mg triamcinolone acetonide vs.<br><u>CG (n=19):</u><br>other eye with 4 mg of triamcinolone acetonide<br><br><u>Duration:</u> 6 months                                                                             | <u>Primary:</u> Visual acuity<br><u>Others:</u> Intraocular pressure (IOP), IOP lowering drugs, complications | after 6 months:<br><u>Complications:</u><br><ul style="list-style-type: none"> <li>no eyes with retinal detachment, vitreous haemorrhage, intraocular reaction or endophthalmitis.</li> <li>one eye in IG developed posterior subcapsular cataract.</li> </ul>                              |
| <b>Nteleki 2015</b><br><br>RCT                 | South<br>Africa,<br>urban                | DM2 with neuropathic or mixed (venous and arterial) ulcers; lower extremity ulcer; stable or worsening ulcer that has been present for ≥ 4 weeks<br><br>no acute cellulitis, osteomyelitis, or gangrene, renal, hepatic, hematologic, neurologic, or immune disease not related to diabetes; presence of malignant disease not in remission for > 5 years; use of oral or parenteral | n=7 with 14 lower extremity ulcers<br>85 % male<br>age (yrs): 62<br>duration of diabetes (yrs): 16.7 | standard podiatric management and<br><u>IG1 (n=2):</u><br>phototherapy to the regional lymphatic nodes and ulcer(s) vs.<br><u>IG2 (n=3):</u><br>phototherapy on the ulcer vs.<br><u>CG (n=2):</u><br>placebo phototherapy<br><u>Duration:</u> 12 weeks | healing rate (area and perimeter of the ulcer)                                                                | after 3 months:<br><u>Healing:</u><br><ul style="list-style-type: none"> <li>The rate of healing increased in all three groups,</li> <li>67% of ulcers received some form of phototherapeutic intervention, 40% of those ulcers resolved completely over 8 weeks</li> <li>no AEs</li> </ul> |

| Study name<br>registration<br>number<br>Design       | Setting<br>Place,<br>setting and<br>time                 | Population<br>Inclusion / Exclusion criteria<br>Characteristics                                                                                                                                                                                                                                                                                                                                                                                                                                                                                                                                                                        | Intervention vs. Control<br>Description with duration                                                                         | Outcomes<br>Primary and secondary                                                                                                                                                                                                                                                                                                                                       | Results<br>Longest follow-up period with<br>intervention effects (IG vs. CG) with<br>SD, 95%-CI or p value                                  |                                                                                                                                                                                                                                                                                                                                                                                                                                            |
|------------------------------------------------------|----------------------------------------------------------|----------------------------------------------------------------------------------------------------------------------------------------------------------------------------------------------------------------------------------------------------------------------------------------------------------------------------------------------------------------------------------------------------------------------------------------------------------------------------------------------------------------------------------------------------------------------------------------------------------------------------------------|-------------------------------------------------------------------------------------------------------------------------------|-------------------------------------------------------------------------------------------------------------------------------------------------------------------------------------------------------------------------------------------------------------------------------------------------------------------------------------------------------------------------|---------------------------------------------------------------------------------------------------------------------------------------------|--------------------------------------------------------------------------------------------------------------------------------------------------------------------------------------------------------------------------------------------------------------------------------------------------------------------------------------------------------------------------------------------------------------------------------------------|
|                                                      |                                                          | corticosteroids,<br>immunosuppressive, or<br>cytotoxic agents; known<br>infection with human<br>immunodeficiency virus or<br>presence of AIDS; other leg<br>ulcers                                                                                                                                                                                                                                                                                                                                                                                                                                                                     |                                                                                                                               |                                                                                                                                                                                                                                                                                                                                                                         |                                                                                                                                             |                                                                                                                                                                                                                                                                                                                                                                                                                                            |
| <b>Saeed 2013</b><br><br>RCT                         | Egypt,<br>urban<br><br>11/2010-<br>07/2012               | DM, intractable diffuse<br>diabetic macular edema<br>without vitreomacular<br>traction.<br>central foveal thickness $\geq 300$<br>$\mu\text{m}$<br><br>no vitreomacular traction,<br>active neovascularization of<br>proliferative diabetic<br>retinopathy, an enlarged<br>foveal avascular zone on<br>fluorescein angiography,<br>neurosensory detachment on<br>optical coherence<br>tomography, treatment for<br>diabetic macular edema<br>within $\leq 3$ months, previous<br>vitreoretinal surgery, other<br>major ocular surgery within<br>the previous 6 months, YAG<br>capsulotomy within $\leq 2$<br>months, macular pathology | n= 34 (34 eyes)<br>50% females<br>age (yrs): $55.5 \pm 8.9$<br>duration of diabetes<br>(yrs): $24 \pm 5.4$                    | <u>IG (n=15):</u><br>vitrectomy with removal<br>of the posterior hyaloid,<br>at the end of the<br>procedure injection of<br>intravitreal triamcinolone<br>acetone (IVTA, 0.1 mL,<br>40 mg/mL) +bevacizumab<br>(1.25 mg) +macular grid<br>laser photocoagulation<br>vs.<br><u>CG (n=15):</u><br>same intravitreal<br>injection combination<br><u>Duration:</u> 12 months | <u>primary:</u><br>BCVA, central foveal<br>thickness                                                                                        | Changes over 12 months<br><u>Complications:</u><br><ul style="list-style-type: none"> <li>Changes in BCVA and central foveal thickness at 3, 6, and 12 (<math>P &lt; 0.01</math>), better mean BCVA in IG at 12 months.</li> <li>Better mean <u>central foveal thickness</u> in IG at 12 months.</li> </ul> <u>Major adverse events:</u><br>development of cataracts (3/15 vs. 6/15) and elevation of intraocular pressure (7/15 vs. 2/15) |
| <b>Tsobgny-Tsague 2018</b><br>NCT02745015<br><br>RCT | Cameroon,<br>urban,<br>tertiary<br>care,<br><br>12/2014- | DM2, >11teeth, severe<br>chronic periodontitis<br>according to the 2012<br>CDC-AAP classification,<br><br>no periodontal treatment,                                                                                                                                                                                                                                                                                                                                                                                                                                                                                                    | n=34<br>56% female<br>age (yrs): $51.4 \pm 8.8$<br>HbA1c (%): $9.3 \pm 1.3$<br>BMI ( $\text{kg}/\text{m}^2$ ): $28.3 \pm 5.4$ | <u>IG (n=17):</u><br>immediate ultrasonic<br>scaling, scaling and root<br>planning +subgingival<br>10% povidone iodine<br>irrigation                                                                                                                                                                                                                                    | <u>Primary:</u> change in HbA1c<br><u>Secondary:</u> Plaque index,<br>gingival bleeding index,<br>pocket depth, clinical<br>attachment loss | Change over 3 months:<br><u>HbA1c (%):</u><br>Benefit with IG: $6.7 \pm 2.0\%$ vs. $8.1 \pm 2.6\%$ , MD: 2.2 ( $p=0.029$ )<br><u>adverse events:</u><br>1 /15 patient reported tongue                                                                                                                                                                                                                                                      |

| Study name<br>registration<br>number<br>Design                                                                                                                                                                                                                                                                                                                                                                                                                                                                                                                                                                                                                                                                                                                                                                                        | Setting<br>Place,<br>setting and<br>time   | Population<br>Inclusion / Exclusion criteria<br>Characteristics                                                                                                                                                                                                                                     | Intervention vs. Control<br>Description with duration                                                                                   | Outcomes<br>Primary and secondary                                                                                                                                                                                                                                                    | Results<br>Longest follow-up period with<br>intervention effects (IG vs. CG) with<br>SD, 95%-CI or p value                                                                                                                               |
|---------------------------------------------------------------------------------------------------------------------------------------------------------------------------------------------------------------------------------------------------------------------------------------------------------------------------------------------------------------------------------------------------------------------------------------------------------------------------------------------------------------------------------------------------------------------------------------------------------------------------------------------------------------------------------------------------------------------------------------------------------------------------------------------------------------------------------------|--------------------------------------------|-----------------------------------------------------------------------------------------------------------------------------------------------------------------------------------------------------------------------------------------------------------------------------------------------------|-----------------------------------------------------------------------------------------------------------------------------------------|--------------------------------------------------------------------------------------------------------------------------------------------------------------------------------------------------------------------------------------------------------------------------------------|------------------------------------------------------------------------------------------------------------------------------------------------------------------------------------------------------------------------------------------|
|                                                                                                                                                                                                                                                                                                                                                                                                                                                                                                                                                                                                                                                                                                                                                                                                                                       | 05/2015                                    | alteration of DM treatment 6 mths prior to the study, onset of systemic diseases or an acute condition, use of immunosuppressive medications or others drugs or presence of conditions able to alter periodontitis clinical features                                                                | duration of diabetes (months): 55.5 ± 42.6 complications: neuropathy (%): 40 nephropathy (%): 7 retinopathy (%): 7 diabetic foot (%): 3 | vs.<br><u>CG(n=17):</u><br>periodontal treatment 3 months later<br><u>Duration: 3 months</u>                                                                                                                                                                                         | irritation following chlorhexidine moth rinse in IG                                                                                                                                                                                      |
| <b>Yakoot 2019</b><br>NCT01531517<br><br>RCT                                                                                                                                                                                                                                                                                                                                                                                                                                                                                                                                                                                                                                                                                                                                                                                          | Egypt,<br>urban<br><br>07/2011-<br>07/2013 | Adult DM2 or DM1 patients, limb-threatening diabetic foot ulcerations<br><br>no life-threatening extensive gangrenous lesions that needed immediate amputations; bad general condition; shock or unstable vital signs; critically ill with severe organ/system dysfunctions or advanced malignancy. | n=119<br>gender:44.5% female<br>age (yrs): 54.7 ±8.4<br>type of diabetes:<br>• DM1: 22.9%<br>• DM2: 86.2%                               | conservative debridement of necrotic tissue and irrigation with warm normal saline and<br><u>IG (n=61):</u><br>local application of ointment composed of royal jelly and panthenol<br><u>vs.</u><br><u>CG (n=58):</u><br>local application of Panthenol<br><u>duration: 12months</u> | <u>primary:</u> complete healing<br><u>secondary:</u> reduction of infection in the ulcer site, al reaction that may be due to study drug<br><br>after 12 months rate of complete healing (%):<br>Benefit for IG: 32.4% vs. 12%; p=0.034 |
| ADA: American Diabetes Association; BCVA: Best-corrected visual acuity; BMI: Body mass index; CG: Control group; CI: Confidence interval; CHC: Community health centre; DBP: Diastolic blood pressure; DM: diabetes mellitus; DM1: Type 1 diabetes; DM2: type 2 diabetes; FPG: fasting plasma glucose; HbA1c: haemoglobin A1c; IG: intervention group; IQR: interquartile range; n: number of participants; NCD: Non-communicable disease; NPH: neutral protamine Hagedorn; MD: mean difference; MDa: adjusted mean difference; NCD: Non-communicable disease ;RCT: randomized controlled trial; RR: Relative risk; RRa: adjusted relative risk; SAE: Serious adverse events; SBP: Systolic blood pressure; SCI: Diabetes Self-Care Inventory; SD: Standard-deviation; SMBG: self-monitoring of blood glucose; wks: weeks; yrs: years |                                            |                                                                                                                                                                                                                                                                                                     |                                                                                                                                         |                                                                                                                                                                                                                                                                                      |                                                                                                                                                                                                                                          |

**Supplementary Table 3:** Characteristics and results of studies on patients with DM2
