# Supplementary material for: Randomised controlled trials on prevention, diagnosis and treatment of diabetes in African countries: a systematic review
Source: PubMed Central journal article supplement — BMJ Open. 2022 May 10;12(5):e050021. doi: 10.1136/bmjopen-2021-050021 (PMC9096485; doi:10.1136/bmjopen-2021-050021), 2022-05-10
Supplement: bmjopen-2021-050021supp004.pdf [file bmjopen-2021-050021supp004.pdf]

## RCTs on pregnant DM patients

| Study name<br>registration<br>number<br>Design  | Setting<br>Place,<br>setting and<br>time    | Population<br>Inclusion / Exclusion criteria<br>Characteristics                                                                                                                                                                                                                                                                                                                                                                                                                                                 | Intervention vs.<br>Control<br>Description with<br>duration                                                                                                                                        | Outcomes<br>Primary and secondary                                                                                                                                                                                                                                                       | Results<br>Longest follow-up period<br>with intervention effects<br>(IG vs. CG) with SD, 95%-<br>CI or p value     | Study name<br>registration number<br>Design                                                                                                                                                                                                        |
|-------------------------------------------------|---------------------------------------------|-----------------------------------------------------------------------------------------------------------------------------------------------------------------------------------------------------------------------------------------------------------------------------------------------------------------------------------------------------------------------------------------------------------------------------------------------------------------------------------------------------------------|----------------------------------------------------------------------------------------------------------------------------------------------------------------------------------------------------|-----------------------------------------------------------------------------------------------------------------------------------------------------------------------------------------------------------------------------------------------------------------------------------------|--------------------------------------------------------------------------------------------------------------------|----------------------------------------------------------------------------------------------------------------------------------------------------------------------------------------------------------------------------------------------------|
| <b>Strategies to increase physical activity</b> |                                             |                                                                                                                                                                                                                                                                                                                                                                                                                                                                                                                 |                                                                                                                                                                                                    |                                                                                                                                                                                                                                                                                         |                                                                                                                    |                                                                                                                                                                                                                                                    |
| <b>Embaby<br/>2016</b><br><br>RCT               | Egypt,<br>urban,<br><br>07/2014-<br>02/2015 | at increased risk for GDM due<br>to obesity (BMI $\geq$ 30 kg/m <sup>2</sup> ),<br>age: $>$ 25 yrs,<br>20-24th gestational wks,<br>multigravida, physically active<br>with $\geq$ 1 of the following 3<br>characteristics: history of<br>macrosomia, abnormal<br>glucose tolerance during<br>previous pregnancy or first<br>grade relative with DM2<br><br>no hypertension, GDM,<br>medications that affects<br>insulin secretion, serious<br>pulmonary disease, cardiac,<br>renal impairment and<br>malignancy | n=40<br>100% female<br>age (yrs): 29.2 $\pm$ 3.8<br>BMI (kg/m <sup>2</sup> ):28.7 $\pm$ 1.3<br>fasting glucose<br>(mmol/l): 6.5 $\pm$ 0.9<br>fasting insulin (IU/l):<br>15.78 $\pm$ 1.58           | <u>IG:</u><br>aerobic exercise program<br>(walking on treadmill)<br>three times weekly until<br>the end of 37 wks of<br>gestation + diet control.<br>vs.<br><u>CG:</u><br>diet control with usual<br>care given by<br>obstetricians and<br>midwives.<br><u>Duration:</u> appr. 4 months | Fasting plasma glucose,<br>Insulin level                                                                           | Change to 37 <sup>th</sup> week of gestation:<br><u>FPG (mmol/l)</u><br>Benefit for IG: 4.26 $\pm$ 0.67 vs. 5.07 $\pm$ 0.54<br>(p=0.0001)<br><u>Fasting insulin (IU/l):</u><br>Benefit for IG: 10.59 $\pm$ 1.10 vs.<br>12.43 $\pm$ 1.44 (p=0.0001) |
| <b>Other non-pharmacological therapies</b>      |                                             |                                                                                                                                                                                                                                                                                                                                                                                                                                                                                                                 |                                                                                                                                                                                                    |                                                                                                                                                                                                                                                                                         |                                                                                                                    |                                                                                                                                                                                                                                                    |
| <b>El-Shamy<br/>2018</b><br><br>RCT             | Egypt,<br>urban<br><br>12/2016-<br>05/2017  | GDM, age: 20-30 yrs,<br>gestational age: 24-26 wks,<br>BMI $\leq$ 30 kg/m <sup>2</sup> , singleton live<br>fetus<br><br>no high-risk pregnancy, bad<br>obstetric situations or<br>diseases, smoking, oral<br>sedatives                                                                                                                                                                                                                                                                                          | n=30<br>100% female<br>age (yrs): 24.2 $\pm$ 2.8<br>75 g OGTT (mg/dl):<br>• fasting glucose:<br>129.05 $\pm$ 0.6<br>• 2h postprandial:<br>146 $\pm$ 1.65<br>BMI (kg/m <sup>2</sup> ): 27 $\pm$ 1.5 | <u>IG (n=15):</u><br>acupressure + standard<br>antenatal care<br>vs.<br><u>CG (n=15):</u><br>standard antenatal care<br>only<br><u>Duration:</u> 12 weeks                                                                                                                               | Primary:<br>glycemic control,<br>requirement for insulin,<br>insulin resistance<br>Secondary:<br>neonatal outcomes | Change over 3 months:<br>75 g OGTT (mg/dl):<br>Fasting: 116.1 $\pm$ 0.1 vs. 118.2 $\pm$ 0.7<br>2h postprandial:<br>125.3 $\pm$ 1.2 vs. 127.3 $\pm$ 0.9<br>Complication (%):<br>5-min Apgar-Score < 7: 6.7 vs. 6.7 %                                |

|                                   |                                                   |                                                                                                                                                                                                                                                                                                                                                                              |                                                                                                                                                                                                                                   |                                                                                                                                                                                                                                                                                                                                                                                                                                                                                                                                                                                                                                                                                     |                                                                                                                                                                                                                                                                                                                                                                                                              |                                                                                                                                                                                                                                                                                                                                                                                                                                                                                                                                                                                                                                                                                                                                                                                 |
|-----------------------------------|---------------------------------------------------|------------------------------------------------------------------------------------------------------------------------------------------------------------------------------------------------------------------------------------------------------------------------------------------------------------------------------------------------------------------------------|-----------------------------------------------------------------------------------------------------------------------------------------------------------------------------------------------------------------------------------|-------------------------------------------------------------------------------------------------------------------------------------------------------------------------------------------------------------------------------------------------------------------------------------------------------------------------------------------------------------------------------------------------------------------------------------------------------------------------------------------------------------------------------------------------------------------------------------------------------------------------------------------------------------------------------------|--------------------------------------------------------------------------------------------------------------------------------------------------------------------------------------------------------------------------------------------------------------------------------------------------------------------------------------------------------------------------------------------------------------|---------------------------------------------------------------------------------------------------------------------------------------------------------------------------------------------------------------------------------------------------------------------------------------------------------------------------------------------------------------------------------------------------------------------------------------------------------------------------------------------------------------------------------------------------------------------------------------------------------------------------------------------------------------------------------------------------------------------------------------------------------------------------------|
| <b>Utz 2018</b><br>NCT02979756    | Marocco,<br>urban /<br>rural,<br>primary<br>care, | Health centres with $\geq 30$<br>monthly antenatal care<br>consultations and all<br>pregnant women with newly<br>diagnosed GDM                                                                                                                                                                                                                                               | 20 health centres<br>n= 215<br>age (yrs):27.6 $\pm$ 6.6<br>urban (%): 38.5<br>rural (%): 61.5                                                                                                                                     | 20 clinics were<br>randomized $\rightarrow$ 10 in each<br>group<br><u>IG (n=120):</u><br>first screening for<br>GDM $\rightarrow$ positive tested<br>women received<br>counselling on nutrition<br>and exercise<br><u>vs.</u><br><u>CG (n=95):</u><br>routine practice                                                                                                                                                                                                                                                                                                                                                                                                              | Primary: birthweight<br>Secondary: maternal<br>weight gain,<br>glucose control,<br>pregnancy complications.                                                                                                                                                                                                                                                                                                  | Follow-up visits:<br>7.5 $\pm$ 4.9 vs. 3.8 $\pm$ 3.3 (p=0.001)<br><br>FBG within the norm: better with IG<br><1/3 of all values: 7.6 vs. 32.6 %<br>1/3-2/3 of all values: 17.8 vs. 32.6 %<br>>2/3 of all values: 74.6 vs. 34.8 %<br><br>Macrosomia (birthweight>4000 g): 3.5<br>vs. 18.4 % (p<0.001)                                                                                                                                                                                                                                                                                                                                                                                                                                                                            |
| <b>Pharmacological strategies</b> |                                                   |                                                                                                                                                                                                                                                                                                                                                                              |                                                                                                                                                                                                                                   |                                                                                                                                                                                                                                                                                                                                                                                                                                                                                                                                                                                                                                                                                     |                                                                                                                                                                                                                                                                                                                                                                                                              |                                                                                                                                                                                                                                                                                                                                                                                                                                                                                                                                                                                                                                                                                                                                                                                 |
| <b>Ashoush 2016</b><br>RCT        | Egypt,<br>urban,<br>tertiary care                 | GDM, mothers with 26–32-<br>week GDM (oral 2-h 75 G<br>glucose tolerance test)<br>singleton pregnancies, failure<br>of satisfactory glycemic<br>control despite adequate diet<br>and exercise for $\geq 1$ wk<br><br>no fetal anomalies on<br>ultrasonography, other<br>pregnancy complications,<br>known intolerance to<br>metformin or risk factors for<br>lactic acidosis | n=95<br>100% female<br>age (yrs): 31.8 $\pm$ 3<br>HbA1c (%): 5.75 $\pm$<br>0.55<br>75g OGTT (mg/dl)<br>• fasting: 106.05 $\pm$ 4.6<br>• 1h:310.25 $\pm$ 11.6<br>• 2h:176.65 $\pm$ 9.4<br>BMI (kg/m <sup>2</sup> ): 31.2 $\pm$ 1.4 | <u>IG (n = 47):</u><br>metformin (initial total<br>dose 1000 mg/d with<br>meals, increase by 500 or<br>850 mg every 1 or 2 wks<br>toward target or up to a<br>maximum dose of<br>2500 mg/d until delivery,<br>addition of insulin if<br>needed)<br><u>vs.</u><br><u>CG (n = 48):</u><br><u>regular insulin + neutral</u><br><u>protamine Hagedorn (3:7)</u><br><u>(starting dose 0.7 units</u><br><u>/kg*d, adjusted to</u><br><u>achieve adequate</u><br><u>glycemic control at</u><br><u>increments of 1</u><br><u>unit/10 mg glucose</u><br><u>higher than the desired</u><br><u>cut-off, short action</u><br><u>insulin whenever needed)</u><br><u>Duration: until delivery</u> | Primary: successful<br>maternal glycemic control<br>Secondary: maternal BMI,<br>glycemic control<br>parameters, maternal<br>weight gained during<br>pregnancy, side effects to<br>metformin, mode of<br>delivery, gestational age<br>at delivery, neonatal<br>birthweight, macrosomia,<br>neonatal hypoglycemia,<br>neonatal death,<br>congenital anomalies,<br>admission to neonatal<br>intensive care unit | Until delivery:<br>fasting glucose during treatment<br>(mg/dl): better with IG:<br>• during the last wk: 78 $\pm$ 3.1 vs. 79.9 $\pm$ 3.7<br>(p=0.008)<br>• during the last 2 wks: 78.9 $\pm$ 3.5 vs.<br>80.8 $\pm$ 4.7 (p=0.029)<br>maternal hypoglycaemia (%):<br>no difference: 6.25 vs. 12.5 (p=0.254)<br>neonatal hypoglycaemia (%):<br>12.8 vs. 14.6 (p=0.791)<br>Maternal weight gain (Kg):<br>4.4 $\pm$ 0.6 vs. 5.1 $\pm$ 0.8 (p=0.001)<br>neonatal congenital anomalies (%):<br>2.1 vs. 2.1 p= 0.747<br>headache (%):<br>27.3 (metformin+insulin) vs. 5.6<br>(metformin monotherapy) vs. 0%<br>(insulin monotherapy)<br>neonatal ICU admission (%):<br>8.5 vs. 10.4 (p= 0.514)<br>Costs (Egyptian pounds): 89.66 $\pm$ 0.96<br>vs. 174.9 $\pm$ 11.1 (for monotherapies) |

|                                              |                 |                                                                                                                                                                                                                                                 |                                                                                                                                                                                                                     |                                                                                                                                                                                                                                                                                                                                                                                    |                                                                                                                                                                                                                                                                                                                                                                                                                                                     |                                                                                                                                                                                                                                                                                                                                                                                                                                                                                                                                                                                                                                                            |
|----------------------------------------------|-----------------|-------------------------------------------------------------------------------------------------------------------------------------------------------------------------------------------------------------------------------------------------|---------------------------------------------------------------------------------------------------------------------------------------------------------------------------------------------------------------------|------------------------------------------------------------------------------------------------------------------------------------------------------------------------------------------------------------------------------------------------------------------------------------------------------------------------------------------------------------------------------------|-----------------------------------------------------------------------------------------------------------------------------------------------------------------------------------------------------------------------------------------------------------------------------------------------------------------------------------------------------------------------------------------------------------------------------------------------------|------------------------------------------------------------------------------------------------------------------------------------------------------------------------------------------------------------------------------------------------------------------------------------------------------------------------------------------------------------------------------------------------------------------------------------------------------------------------------------------------------------------------------------------------------------------------------------------------------------------------------------------------------------|
| <b>Beyuo 2015</b><br>ACTRN126140<br>00942651 | Ghana,<br>urban | pregnant women with DM2 or GDM (plasma glucose $\geq 7$ mmol/l after an overnight fast or plasma glucose concentration $\geq 11.1$ mmol/l 2 hours after a 75 g glucose drink), 20-30 wks gestation, age: 18-45yrs, eligible for insulin therapy | n= 104<br>100% female<br>age (yrs): 33.3 $\pm$ 4.6<br>fasting glucose (mmol/l): 8<br>2HPG (mmol/l): 10.5<br>BMI (kg/m <sup>2</sup> ): 3.1 $\pm$ 6.6<br>type of diabetes:<br>GDM (%): 65.9<br>DM2 (%): 34.0          | <u>IG (n=52):</u><br>Metformin (starting with 500 mg / d, gradually increase over 2 wks to a maximum dose of 2500 mg/d, insulin was added if necessary)<br>vs.<br><u>CG (n=52):</u><br>insulin treatment (daily dose 0.3 IU/kg, titrated to achieve the glycemic targets, if necessary, admission to the ward and therapy with soluble insulin)<br><u>Duration: until delivery</u> | Primary: 2-hour post prandial blood glucose (2HPG)<br>Secondary: fasting glucose, 1HPG, maternal weight gain, pregnancy outcome and fetoneonatal outcomes.                                                                                                                                                                                                                                                                                          | Change from enrolment to delivery: glycemic control (mmol/l):<br>fasting glucose:<br>no difference: 6.42 $\pm$ 0.98 vs. 6.62 $\pm$ 1.57 (p=0.928)<br>1HPG:<br>no difference: 8.95 $\pm$ 1.27 vs. 9.62 $\pm$ 1.44 (p=0.078)<br>2HPG:<br>benefit for IG: 7.84 $\pm$ 1.43 vs. 9.05 $\pm$ 1.89 (p=0.004)                                                                                                                                                                                                                                                                                                                                                       |
| <b>Ibrahim 2014</b><br>NCT01915550           | Egypt,<br>urban | GDM or pre-existing DM, gestational age 20-34 wks with insulin resistance<br>No DM1, secondary diabetes or liver or renal impairment                                                                                                            | n=90<br>100% female<br>age (yrs): 29.8 $\pm$ 5.4<br>BMI (kg/m <sup>2</sup> ):31.83 $\pm$ 3.23<br>Gestational age: 28.7 $\pm$ 3.7 wks<br>GDM: 43.3 %<br>Pre-existing DM: 56.7 % with median duration of 4 (1-15) yrs | <u>IG (n=46):</u><br>Metformin (1500 mg, raised to 2000 mg) without increasing insulin dose<br>Patients switched to CG if treatment was not successful to control blood glucose concentrations<br><u>CG (n=44):</u><br>insulin dose was increased according to the standard protocol                                                                                               | Primary:<br>maternal glycemic control (fasting glucose $\leq 95$ mg/dl and 2-HPG $\leq 120$ mg/dl)<br>Secondary:<br>maternal bouts of hypoglycemia, need for another hospital admission for uncontrolled diabetes during pregnancy, gestational age at delivery, mode of delivery, birth weight, birth trauma, congenital anomalies, Apgar score, neonatal hypoglycemia, need for neonatal intensive care unit admission, adverse neonatal outcomes | glycemic control:<br><ul style="list-style-type: none"> <li>• better for CG: 76.1 vs. 100 % reached glycemic control (p=0.001)</li> <li>• 13 vs. 18.2 % had readmission for poor glycemic control</li> <li>• 6.5 vs. 22.7 % had bouts of maternal hypoglycaemia</li> </ul> Complications:<br><ul style="list-style-type: none"> <li>• 23.3 vs. 30.8 % had fetal macrosomia</li> <li>• 1 new-born in each group had congenital malformations</li> <li>• 7 vs. 38.5 % had neonatal hypoglycaemia</li> <li>• 18.6 vs. 41 % had NICU admission</li> <li>• 0 vs. 5.1 % had stillbirths</li> <li>• 11.6 vs. 25.6 % with respiratory distress syndrome</li> </ul> |

BMI: Body mass index; CG: Control group; CI: Confidence interval; DM: diabetes mellitus; DM2: type 2 diabetes; FPG: fasting plasma glucose; GDM: gestational diabetes; HbA1c: haemoglobin A1c; 1 / 2HPG: 1 / 2-hour post prandial blood glucose; IG: intervention group; n: number of participants; MD: mean difference; MDa: adjusted mean difference; OGTT: Oral glucose tolerance test; RCT: randomized controlled trial; RR: Relative risk; RRa: adjusted relative risk; SD: Standard-deviation; wks: weeks; yrs: years

**Supplementary Table 4:** Characteristics and results of studies on pregnant women with DM
