# Supplementary material for: Randomised controlled trials on prevention, diagnosis and treatment of diabetes in African countries: a systematic review
Source: PubMed Central journal article supplement — BMJ Open. 2022 May 10;12(5):e050021. doi: 10.1136/bmjopen-2021-050021 (PMC9096485; doi:10.1136/bmjopen-2021-050021), 2022-05-10
Supplement: bmjopen-2021-050021supp005.pdf [file bmjopen-2021-050021supp005.pdf]

## Risk of bias

| Study            | Sequence generation | Allocation concealment | Blinding of participants/personnel | Blinding of outcome assessors | Incomplete outcome data | Selective outcome reporting | Other risk of bias |
|------------------|---------------------|------------------------|------------------------------------|-------------------------------|-------------------------|-----------------------------|--------------------|
| Abaza 2017       |                     |                        |                                    |                               |                         |                             |                    |
| Abdulrhman 2013  |                     |                        |                                    |                               |                         |                             |                    |
| Adibe 2013       |                     |                        |                                    |                               |                         |                             |                    |
| Adjei 2015       |                     |                        |                                    |                               |                         |                             |                    |
| Ali 2019         |                     |                        |                                    |                               |                         |                             |                    |
| Amendezo 2017    |                     |                        |                                    |                               |                         |                             |                    |
| Anderson 2001    |                     |                        |                                    |                               |                         |                             |                    |
| Anyanwu 2016     |                     |                        |                                    |                               |                         |                             |                    |
| Ashoush 2016     |                     |                        |                                    |                               |                         |                             |                    |
| Asuako 2017      |                     |                        |                                    |                               |                         |                             |                    |
| Beyuo 2015       |                     |                        |                                    |                               |                         |                             |                    |
| Chraibi 2017     |                     |                        |                                    |                               |                         |                             |                    |
| Debussche 2018   |                     |                        |                                    |                               |                         |                             |                    |
| Distiller 2014   |                     |                        |                                    |                               |                         |                             |                    |
| Elbarbary 2016   |                     |                        |                                    |                               |                         |                             |                    |
| Elbarbary 2018   |                     |                        |                                    |                               |                         |                             |                    |
| Elbarbary 2020   |                     |                        |                                    |                               |                         |                             |                    |
| El Gayar 2019    |                     |                        |                                    |                               |                         |                             |                    |
| El-Haggar 2015   |                     |                        |                                    |                               |                         |                             |                    |
| El-Makaky 2020   |                     |                        |                                    |                               |                         |                             |                    |
| El-Shamy 2018    |                     |                        |                                    |                               |                         |                             |                    |
| El-Sharkawy 2016 |                     |                        |                                    |                               |                         |                             |                    |
| El-Sheikh 2019   |                     |                        |                                    |                               |                         |                             |                    |
| Embaby 2016      |                     |                        |                                    |                               |                         |                             |                    |
| Essien 2017      |                     |                        |                                    |                               |                         |                             |                    |
| Fairall 2016     |                     |                        |                                    |                               |                         |                             |                    |
| Fayehun 2018     |                     |                        |                                    |                               |                         |                             |                    |
| Ghoneim 2013     |                     |                        |                                    |                               |                         |                             |                    |
| Hailu 2018       |                     |                        |                                    |                               |                         |                             |                    |
| Ibrahim 2014     |                     |                        |                                    |                               |                         |                             |                    |
| Krawinkel 2018   |                     |                        |                                    |                               |                         |                             |                    |

| Study               | Sequence generation | Allocation concealment | Blinding of participants/personnel | Blinding of outcome assessors | Incomplete outcome data | Selective outcome reporting | Other risk of bias |
|---------------------|---------------------|------------------------|------------------------------------|-------------------------------|-------------------------|-----------------------------|--------------------|
| Labhardt 2011       | 😊                   | 😊                      | 😞                                  | 😊                             | 😊                       | 😊                           | 😊                  |
| Maharaj 2016        | 😊                   | 😊                      | 😞                                  | 😊                             | 😊                       | 😊                           | 😞                  |
| Malek 2015          | 😊                   | 😊                      | 😞                                  | 😊                             | 😊                       | 😊                           | 😊                  |
| Malipa 2013         | 😊                   | 😊                      | 😞                                  | 😞                             | 😊                       | 😊                           | 😞                  |
| Mash 2014           | 😊                   | 😊                      | 😞                                  | 😞                             | 😞                       | 😊                           | 😊                  |
| Matter 2020         | 😊                   | 😊                      | 😊                                  | 😊                             | 😊                       | 😞                           | 😊                  |
| Mohamad 2009        | 😊                   | 😊                      | 😞                                  | 😊                             | 😊                       | 😊                           | 😞                  |
| Moustafa 2019       | 😊                   | 😊                      | 😞                                  | 😊                             | 😞                       | 😊                           | 😞                  |
| Muchiri 2015        | 😊                   | 😊                      | 😞                                  | 😊                             | 😊                       | 😊                           | 😞                  |
| Nteleki 2015        | 😞                   | 😊                      | 😞                                  | 😊                             | 😊                       | 😊                           | 😞                  |
| Owolabi 2019        | 😊                   | 😊                      | 😞                                  | 😊                             | 😊                       | 😞                           | 😞                  |
| Rashad 2017         | 😊                   | 😊                      | 😊                                  | 😊                             | 😞                       | 😊                           | 😞                  |
| Ragheb 2020         | 😊                   | 😊                      | 😞                                  | 😞                             | 😞                       | 😊                           | 😊                  |
| RezkAllah 2019      | 😊                   | 😊                      | 😞                                  | 😊                             | 😊                       | 😊                           | 😊                  |
| Saeed 2013          | 😊                   | 😊                      | 😞                                  | 😞                             | 😞                       | 😊                           | 😞                  |
| Salem 2010          | 😊                   | 😊                      | 😞                                  | 😞                             | 😊                       | 😊                           | 😞                  |
| Sodipo 2017         | 😊                   | 😊                      | 😞                                  | 😊                             | 😞                       | 😊                           | 😊                  |
| Somanah 2012        | 😊                   | 😊                      | 😞                                  | 😊                             | 😞                       | 😞                           | 😞                  |
| Steyn 2013          | 😊                   | 😊                      | 😞                                  | 😊                             | 😞                       | 😊                           | 😊                  |
| Takenga 2014        | 😊                   | 😊                      | 😞                                  | 😊                             | 😊                       | 😊                           | 😞                  |
| Tawfik 2016         | 😊                   | 😊                      | 😊                                  | 😊                             | 😞                       | 😊                           | 😊                  |
| Thuita 2020         | 😊                   | 😊                      | 😞                                  | 😊                             | 😊                       | 😊                           | 😊                  |
| Tsobgny-Tsague 2018 | 😊                   | 😊                      | 😞                                  | 😊                             | 😞                       | 😊                           | 😊                  |
| Utz 2018            | 😊                   | 😊                      | 😞                                  | 😊                             | 😊                       | 😞                           | 😞                  |
| Van der Hoogt 2017  | 😊                   | 😊                      | 😞                                  | 😊                             | 😞                       | 😊                           | 😞                  |
| Van Rooijen 2004    | 😊                   | 😊                      | 😞                                  | 😊                             | 😊                       | 😊                           | 😞                  |
| Webb 2015           | 😊                   | 😊                      | 😊                                  | 😊                             | 😞                       | 😊                           | 😊                  |
| Yakoot 2019         | 😊                   | 😊                      | 😞                                  | 😞                             | 😊                       | 😞                           | 😞                  |
| Yan 2014            | 😊                   | 😊                      | 😞                                  | 😊                             | 😊                       | 😊                           | 😞                  |

😊: low, 😊: unclear, 😞: high risk of bias

Supplementary Table 5: Judgements on risk of bias
