# Supplementary material for: Randomised controlled trials on prevention, diagnosis and treatment of diabetes in African countries: a systematic review
Source: PubMed Central journal article supplement — BMJ Open. 2022 May 10;12(5):e050021. doi: 10.1136/bmjopen-2021-050021 (PMC9096485; doi:10.1136/bmjopen-2021-050021), 2022-05-10
Supplement: bmjopen-2021-050021supp006.pdf [file bmjopen-2021-050021supp006.pdf]

## Search strategies

### Medline (Ovid)

Search on 19.11.2018, 1470 references, Update from 2018 to Current on 20.08.2020: 541 references

| Nr.       | Searches                                                            |
|-----------|---------------------------------------------------------------------|
| 1.        | exp Diabetes Mellitus/                                              |
| 2.        | Diabetes.tw                                                         |
| <b>3.</b> | <b>or/1-2</b>                                                       |
| 4.        | Africa.tw                                                           |
| 5.        | Exp Africa/                                                         |
| 6.        | Algeria\$.tw or exp Algeria/                                        |
| 7.        | Angol\$.tw or exp Angola/                                           |
| 8.        | Benin\$.tw or exp Benin/                                            |
| 9.        | Botswan\$.tw or exp Botswana/                                       |
| 10.       | Burkina Faso.tw or exp Burkina Faso/                                |
| 11.       | Burund\$.tw or exp Burundi/                                         |
| 12.       | Cameroon\$.tw or exp Cameroon/                                      |
| 13.       | Cape Verde.tw or exp Cape Verde/                                    |
| 14.       | Central African Republic\$.tw or exp Central African Republic/      |
| 15.       | Chad\$.tw or exp Chad/                                              |
| 16.       | Comoros\$.tw or exp Comoros/                                        |
| 17.       | Cote d'Ivoire.tw or exp Cote d'Ivoire/                              |
| 18.       | Democratic Republic of Congo.tw or exp Democratic Republic of Congo |
| 19.       | Djibout\$.tw or exp Djibouti/                                       |
| 20.       | Egypt\$.tw or exp Egypt/                                            |
| 21.       | Equatorial Guinea\$.tw or exp Equatorial Guinea/                    |
| 22.       | Eritrea\$.tw or exp Eritrea/                                        |
| 23.       | Ethiop\$.tw or exp Ethiopia/                                        |
| 24.       | Gabon\$.tw or exp Gabon/                                            |
| 25.       | Gambia\$.tw or exp Gambia/                                          |
| 26.       | Ghana\$.tw or exp Ghana/                                            |
| 27.       | Guinea\$.tw or exp Guinea/                                          |
| 28.       | Guinea-Bissau.tw or exp Guinea-Bissau/                              |
| 29.       | Kenya\$.tw or exp Kenya/                                            |
| 30.       | Lesoth\$.tw or exp Lesotho/                                         |
| 31.       | Liberia\$.tw or exp Liberia/                                        |
| 32.       | Libya\$.tw or exp Libya/                                            |
| 33.       | Madagascar\$.tw or exp Madagascar/                                  |
| 34.       | Malawi\$.tw or exp Malawi/                                          |

| <b>Nr.</b> | <b>Searches</b>                              |
|------------|----------------------------------------------|
| 35.        | Mali.tw or exp Mali/                         |
| 36.        | Mauritania\$.tw or exp Mauritania/           |
| 37.        | Mauritius\$.tw or exp Mauritius/             |
| 38.        | Morocc\$.tw or exp Morocco/                  |
| 39.        | Mozambique\$.tw or exp Mozambique/           |
| 40.        | Namibia\$.tw or exp Namibia/                 |
| 41.        | Niger.tw or exp Niger/                       |
| 42.        | Nigeria\$.tw or exp Nigeria/                 |
| 43.        | Rwanda\$.tw or exp Rwanda/                   |
| 44.        | (Sao Tome and Principe).tw                   |
| 45.        | Senegal\$.tw or exp Senegal/                 |
| 46.        | Seychell\$.tw                                |
| 47.        | Sierra Leone.tw or exp Sierra Leone/         |
| 48.        | Somalia\$.tw or exp Somalia/                 |
| 49.        | South Africa\$.tw or exp South Africa.de     |
| 50.        | South Sudan.tw or exp South Sudan/           |
| 51.        | Sudan\$.tw or exp Sudan/                     |
| 52.        | Swaziland\$.tw or exp Swaziland/             |
| 53.        | Tanzania\$.tw or exp Tanzania/               |
| 54.        | Togo\$.tw or exp Togo/                       |
| 55.        | Tunisia\$.tw or exp Tunisia/                 |
| 56.        | Uganda\$.tw or exp Uganda/                   |
| 57.        | Zambia\$.tw or exp Zambia/                   |
| 58.        | Zimbabwe\$.tw or exp Zimbabwe/               |
| 59.        | Somaliland\$.tw or exp Somaliland/           |
| 60.        | Sahrawi Arab Democratic Republic.tw.         |
| 61.        | or/4-60                                      |
| 62.        | randomized controlled trial.pt.              |
| 63.        | controlled clinical trial.pt.                |
| 64.        | (randomized or randomised or randomly).ti,ab |
| 65.        | placebo.ti,ab.                               |
| 66.        | trial.ti,ab.                                 |
| 67.        | groups.ti,ab.                                |
| 68.        | or/62-67                                     |
| 69.        | 3 and 61 and 68                              |
| 70.        | exp animals/ not humans.sh.                  |
| 71.        | 69 not 70                                    |
| 72.        | 71 not (comment or editorial).pt.            |

**CENTRAL**

Search on 14.01.2019, 439 trials, Update from 2018 to Current on 20.08.2020: 244 trials

|    |                                                                                                                       |
|----|-----------------------------------------------------------------------------------------------------------------------|
| 1  | Africa, explode all trees                                                                                             |
| 2  | Algeria* or Angol* or Benin* or Botswan*                                                                              |
| 3  | (Burkina Faso) or Burund* or Cameroon* or (Cape Verde) or (Central African Republic)                                  |
| 4  | Chad* or Comoros* or Cote d'Ivoire or Congo*                                                                          |
| 5  | Djibout* or Egypt* or (Equatorial Guinea*) or Eritrea*                                                                |
| 6  | Ethiop* or Gabon* or Gambia* or Ghana* or Guinea* or Guinea-Bissau                                                    |
| 7  | Kenya* or Lesoth* or Liberia* or Libya* or Madagascar* or Malawi*                                                     |
| 8  | Mali* or Mauritania* or Mauritius* or Morocc* or Mozambique* or Namibia* or Niger*                                    |
| 9  | Nigeria* or Rwanda* or (Sao Tome and Principe) or Senegal* or Seychell*                                               |
| 10 | Sierra Leone or Somalia* or (South Africa) or (South Sudan*) or Sudan* or Swasiland                                   |
| 11 | Tanzania* or Togo* or Tunisia* or Uganda* or Zambia* or Zimbabwe* or Somaliland or (Sahrawi Arab Democratic Republic) |
| 12 | #1 or #2 or #3 or #4 or #5 or #6 or #7 or #8 or #9 or #10 or #11                                                      |
| 13 | MeSH descriptor Diabetes, this term only                                                                              |
| 14 | MESH descriptor Diabetes mellitus, explode all trees                                                                  |
| 15 | Diabetes near 3 gestation*                                                                                            |
| 16 | Latent autoimmune diabetes in adults                                                                                  |
| 17 | Prediabetes                                                                                                           |
| 18 | Insulin resistan*                                                                                                     |
| 20 | HBA1C                                                                                                                 |
| 21 | Diabet* near 3 (angiopath* or foot orfeet or retinopath*)                                                             |
| 22 | Diabet* near 3 (cardiomyopathy* or coma or ketoacido* or neuropath*)                                                  |
| 23 | #13 or #14 or #15 or #16 or #17 or #18 or #19 or #20 or #21                                                           |
| 32 | #12 and #23                                                                                                           |

**CINAHL**

Search on 20.08.2020: 19 results

(Africa\$ or Africa\$ or Algeria\$ or Angol\$ or Benin\$ or Botswan\$ or (Burkina Faso) or Burund\$ or Cameroon\$ or (Cape Verde) or (Central African Republic) or Chad\$ or Comoros\$ or Cote d'Ivoire or Congo\$ Djibout\$ or Egypt\$ or (Equatorial Guinea\$) or Eritrea\$

or Ethiop\$ or Gabon\$ or Gambia\$ or Ghana\$ or Guinea\$ or Guinea-Bissau or Kenya\$ or Lesoth\$ or Liberia\$ or Libya\$ or Madagascar\$ or Malawi\$ or Mali\$ or Mauritania\$ or Mauritius\$ or Morocco\$ or Mozambique\$ or Namibia\$ or Niger\$ or Nigeria\$ or Rwanda\$ or (Sao Tome and Principe) or Senegal\$ or Seychell\$ or Sierra Leone or Somalia\$ or (South Africa) or (South Sudan\$) or Sudan\$ or Swasiland or Tanzania\$ or Togo\$ or Tunisia\$ or Uganda\$ or Zambia\$ or Zimbabwe\$ or Somaliland or (Sahrawi Arab Democratic Republic))  
in Abstract

AND

diabetes in Abstract

AND

randomized or rct or randomized in Abstract

AND

In English

AND

Peer-reviewed

And

Humans

### **International Clinical Trials Registry Platform**

Search on 9.-10.10.2019, update on 25.08.2020 (registration January 2019 to 31.08.2020)

<http://apps.who.int/trialsearch/AdvSearch.aspx>

1. Africa or African in the Title and diabetes or diabetic or HbA1c in the condition,  
Recruitment status: all: 90 records for 90 trials (9.10.2019)
2. diabetes or diabetic or HbA1c in the condition  
Recruitment status: all  
Countries of recruitment: Algeria or Angola or Benin or Botswana or Burkina Faso or Burundi or Cameroon or Central African Republic or Chad or Congo or Cite D'ivoire: 96 record for 63 trials
3. diabetes or diabetic or HbA1c in the condition  
Recruitment status: all  
Countries of recruitment: Democratic Republic of Congo or Djibouti or Egypt or Equatorial Guinea or Eritrea or Ethiopia: 292 records for 159 trials
4. diabetes or diabetic or HbA1c in the condition  
Recruitment status: all  
Countries of recruitment: Gabon or Gambia or Ghana or Guinea or Guinea-Bissau or Kenya or Lesotho or Liberia or Lybia: 22 records for 22 trials
5. diabetes or diabetic or HbA1c in the condition

- Recruitment status: all  
Countries of recruitment: Madagascar or Malawi or Mali or Mauritania or Mauritius or Morocco or Mozambique: 96 records for 34 trials
6. diabetes or diabetic or HbA1c in the condition  
Recruitment status: all  
Countries of recruitment: Nigeria: 13 records for 13 trials
7. diabetes or diabetic or HbA1c in the condition  
Recruitment status: all  
Countries of recruitment: Namibia or Niger or Rwanda or (Sao Tome and Principe) or Senegal or Seychelles or Sierra Leone or Somalia or South Sudan or Sudan or Swaziland:  
11 records for 11 trials
8. diabetes or diabetic or HbA1c in the condition  
Recruitment status: all  
Countries of recruitment: South Africa: 1528 records for 429 trials:
9. diabetes or diabetic or HbA1c in the condition  
Recruitment status: all  
Countries of recruitment: Togo or Tunisia or Uganda or Zambia or Zimbabwe: 129 records for 50 trials

### **African Journals Online**

<https://www.ajol.info/index.php/index/search/search?query=%28diabetes+or+diabetic+or+hba1c%29+and+%28random+or+randomized+or+randomised%29&dateFromYear=2004&dateFromMonth=01&dateFromDay=1&dateToYear=2020&dateToMonth=10&dateToDay=14&autohors=>

Advanced search 14.10.2020

Titel: (diabetes or diabetic or hba1c) and (random or randomized or randomised)

30 results

### **African Index Medicus Database**

[http://indexmedicus.afro.who.int/aim/opac\\_css/index.php?lvl=search\\_result&get\\_query=4](http://indexmedicus.afro.who.int/aim/opac_css/index.php?lvl=search_result&get_query=4)

Advanced search 14.10.2020

Titel, Expression booléenne: (diabetes or diabetic or hba1c) and (random or randomized or randomised)

122 results, no potentially eligible references

## 1 List of included and excluded studies

### 1.1 List of included studies

#### **Abaza 2017**

Abaza H, Marschollek M. SMS education for the promotion of diabetes self-management in low & middle income countries: a pilot randomized controlled trial in Egypt. *BMC public health*. 2017;17(1):962.

Abaza H, Marschollek M, Schulze M. SMS Education for the Promotion of Diabetes Self-Management in Low & Middle Income Countries: A Randomized Controlled Trial in Egypt. *Studies in Health Technology & Informatics*. 2017;245:1209.

#### **Abdulrhman 2013**

Abdulrhman MM, El-Hefnawy MH, Aly RH, Shatla RH, Mamdouh RM, Mahmoud DM, et al. Metabolic effects of honey in type 1 diabetes mellitus: a randomized crossover pilot study. *Journal of Medicinal Food*. 2013;16(1):66-72.

#### **Adibe 2013**

Adibe MO, Ukwe CV, Aguwa CN. The Impact of Pharmaceutical Care Intervention on the Quality of Life of Nigerian Patients Receiving Treatment for Type 2 Diabetes. *Value in Health Regional Issues*. 2013;2(2):240-7.

Adibe MO, Aguwa CN, Ukwe CV. Cost-Utility Analysis of Pharmaceutical Care Intervention Versus Usual Care in Management of Nigerian Patients with Type 2 Diabetes. *Value in Health Regional Issues*. 2013;2(2):189-98.

#### **Adjei 2015**

Adjei DN, Agyemang C, Dasah JB, Kuranchie P, Amoah AG. The effect of electronic reminders on risk management among diabetic patients in low resourced settings. *Journal of Diabetes & its Complications*. 2015;29(6):818-21.

#### **Ali 2019**

Ali S, Ghanem Y, Sharaki O, Hewedy W, al. e. The impact of different regimens of vitamin d3 on glucose homeostasis in type 2 diabetic patients. *Asian journal of pharmaceutical and clinical research*. 2019;12(12):21- 6.

#### **Amendezo 2017**

Amendezo E, Walker Timothy D, Karamuka V, Robinson B, Kavabushi P, Ntirenganya C, et al. Effects of a lifestyle education program on glycemic control among patients with diabetes at Kigali University Hospital, Rwanda: A randomized controlled trial. *Diabetes Research & Clinical Practice*. 2017;126:129-37.

#### **Anderson 2001**

Anderson RA, Roussel AM, Zouari N, Mahjoub S, Matheau JM, Kerkeni A. Potential antioxidant effects of zinc and chromium supplementation in people with type 2 diabetes mellitus. *Journal of the American College of Nutrition*. 2001;20(3):212-8.

#### **Anyanwu 2016**

Anyanwu AC, Fasanmade OA, Odeniyi IA, Iwuala S, Coker HB, Ohwovoriole AE. Effect of Vitamin D supplementation on glycemic control in Type 2 diabetes subjects in Lagos, Nigeria. *Indian Journal of Endocrinology and Metabolism*. 2016;20(2):189-94.

#### **Ashoush 2016**

Ashoush S, El-Said M, Fathi H, Abdelnaby M. Identification of metformin poor responders, requiring supplemental insulin, during randomization of metformin versus insulin for the control of gestational diabetes mellitus. *Journal of obstetrics and gynaecology research*. 2016;42(6):640- 7.

#### **Asuako 2017**

Asuako B, Moses MO, Eghan BA, Sarpong PA. Fasting plasma glucose and lipid profiles of diabetic patients improve with aerobic exercise training. *Ghana Medical Journal*. 2017;51(3):120-7.

#### **Beyuo 2015**

Beyuo T, Obed SA, Adjepong-Yamoah KK, Bugyei KA, Oppong SA, Marfoh K. Metformin versus Insulin in the Management of Pre-Gestational Diabetes Mellitus in Pregnancy and Gestational Diabetes Mellitus at the Korle Bu Teaching Hospital: A Randomized Clinical Trial. *PLoS ONE [Electronic Resource]*. 2015;10(5):e0125712.

#### **Chraibi 2017**

Chraibi A, Al-Herz S, Nguyen BD, Soeatmadji DW, Shinde A, Lakshmivenkataraman B, et al. An RCT Investigating Patient-Driven Versus Physician-Driven Titration of BIAsp 30 in Patients with Type 2 Diabetes Uncontrolled Using NPH Insulin. *Diabetes Therapy Research, Treatment and Education of Diabetes and Related Disorders*. 2017;8(4):767-80.

#### **Debussche 2018**

Debussche X, Besancon S, Balcou-Debussche M, Ferdynus C, Delisle H, Huiart L, et al. Structured peer-led diabetes self-management and support in a low-income country: The ST2EP randomised controlled trial in Mali. *PLoS ONE*. 2018;13(1):e0191262.

#### **Distiller 2014**

Distiller LA, Nortje H, Wellmann H, Amod A, Lombard L. A 24-week, prospective, randomized, open-label, treat-to-target pilot study of obese type 2 diabetes patients with severe insulin resistance to assess the addition of exenatide on the efficacy of U-500 regular insulin plus metformin. *Endocrine practice*. 2014;20(11):1143- 50.

#### **El Gayar 2019**



El Gayar MH, Aboromia MMM, Ibrahim NA, Abdel Hafiz MH. Effects of ginger powder supplementation on glycemic status and lipid profile in newly diagnosed obese patients with type 2 diabetes mellitus. *Obesity medicine*. 2019;14.

**El-Haggag 2015**

El-Haggag SM, Farrag WF, Kotkata FA. Effect of ketotifen in obese patients with type 2 diabetes mellitus. *Journal of Diabetes & its Complications*. 2015;29(3):427-32.

**El-Makaky 2020**

El-Makaky Y, Shalaby HK. The effects of non-surgical periodontal therapy on glycemic control in diabetic patients: a randomized controlled trial. *Oral diseases*. 2020;26:822-9.

**El-Shamy 2018**

El-Shamy FF, El-Kholy SS, Labib M, Kabel AM. Ameliorative potential of acupuncture on gestational diabetes mellitus: a randomized controlled trial. *Journal of complementary and integrative medicine*. 2018; 16(1).

**El-Sheikh 2019**

El-Sheikh HM, El-Haggag SM, Elbedewy TA. Comparative study to evaluate the effect of L-carnitine plus glimepiride versus glimepiride alone on insulin resistance in type 2 diabetic patients. *Diabetes and metabolic syndrome: clinical research and reviews*. 2019;13(1):167-73.

**El- Sharkawy 2016**

El- Sharkawy HM, Anees MM, Van Dyke TE. Propolis improves periodontal status and glycemic control in patients with type 2 diabetes mellitus and chronic periodontitis: a randomized clinical trial. *Journal of periodontology*. 2016;87(12):1418-26.

**Elbarbary 2016**

Elbarbary NS. Effectiveness of the low-glucose suspend feature of insulin pump during fasting during Ramadan in type 1 diabetes mellitus. *Diabetes/metabolism research and reviews*. 2016;32(6):623- 33.

**Elbarbary 2018**

Elbarbary NS, Ismail EAR, El-Naggag AR, Hamouda MH, El-Hamamsy M. The effect of 12 weeks carnosine supplementation on renal functional integrity and oxidative stress in pediatric patients with diabetic nephropathy: a randomized placebo-controlled trial. *Pediatric diabetes*. 2018;19(3):470- 7.

**Elbarbary 2020**

Elbarbary NS, Ismail EAR, Zaki MA, Darwish YW, Ibrahim MZ, El-Hamamsy M. Vitamin B complex supplementation as a homocysteine-lowering therapy for early stage diabetic nephropathy in pediatric patients with type 1 diabetes: A randomized controlled trial. *Clinical Nutrition*. 2020;39(1):49-56.

**Embaby 2016**

Embaby H, Elsayed E, Fawzy M. Insulin Sensitivity and Plasma Glucose Response to Aerobic Exercise in Pregnant Women at Risk for Gestational Diabetes Mellitus. *Ethiopian journal of health sciences*. 2016;26(5):409- 14.

**Essien 2017**

Essien O, Otu A, Umoh V, Enang O, Hicks JP, Walley J. Intensive Patient Education Improves Glycaemic Control in Diabetes Compared to Conventional Education: A Randomised Controlled Trial in a Nigerian Tertiary Care Hospital. *PLoS ONE* 2017;12(1):e0168835.

**Fairall 2016**

Fairall LR, Folb N, Timmerman V, Lombard C, Steyn K, Bachmann MO, et al. Educational Outreach with an Integrated Clinical Tool for Nurse-Led Non-communicable Chronic Disease Management in Primary Care in South Africa: a Pragmatic Cluster Randomised Controlled Trial. *Plos medicine*. 2016;13(11):e1002178.

**Fayehun 2018**

Fayehun AF, Olowookere OO, Ogunbode AM, Adetunji AA, Esan A. Walking prescription of 10 000 steps per day in patients with type 2 diabetes mellitus: a randomised trial in Nigerian general practice. *British Journal of General Practice*. 2018;68(667):e139-e45.

**Ghoneim 2013**

Ghoneim EM, Abd El Ghany AA. Behavior of intraocular pressure after intravitreal injection of triamcinolone acetonide among egyptians. *Ophthalmology and Therapy*. 2013;2(2):121-30.

**Hailu 2018**

Hailu FB, Hjortdahl P, Moen A. Nurse-Led Diabetes Self-Management Education Improves Clinical Parameters in Ethiopia. *Frontiers in Public Health*. 2018;6:302.

**Ibrahim 2014**

Ibrahim MI, Hamdy A, Shafik A, Taha S, Anwar M, Faris M. The role of adding metformin in insulin-resistant diabetic pregnant women: a randomized controlled trial. *Archives of Gynecology & Obstetrics*. 2014;289(5):959-65.

**Krawinkel 2018**

Krawinkel MB, Ludwig C, Swai ME, Yang RY, Chun KP, Habicht SD. Bitter melon reduces elevated fasting plasma glucose levels in an intervention study among prediabetics in Tanzania. *Journal of Ethnopharmacology*. 2018;216:1-7.

**Labhardt 2011**

Labhardt ND, Balo JR, Ndam M, Manga E, Stoll B. Improved retention rates with low-cost interventions in hypertension and diabetes management in a rural African environment of nurse-led care: a cluster-randomised trial. *Tropical Medicine & International Health*. 2011;16(10):1276-84.

**Maharaj 2016**

Maharaj SS, Nuhu JM. Rebound exercise: A beneficial adjuvant for sedentary non-insulin-dependent type 2 diabetic individuals in a rural environment. *Australian Journal of Rural Health*. 2016;24(2):123-9.

**Malek 2015**

Malek R, Ajili F, Assaad-Khalil SH, Shinde A, Chen JW, Van den Berg E. Similar glucose control with basal-bolus regimen of insulin detemir plus insulin aspart and thrice-daily biphasic insulin aspart 30 in insulin-naive patients with type 2 diabetes: Results of a 50-week randomized clinical trial of stepwise insulin intensification. *Diabetes & Metabolism*. 2015;41(3):223-30.

**Marais 2018**

Marais C, Hall DR, van Wyk L, Conradie M. Randomized cross-over trial comparing the diagnosis of gestational diabetes by oral glucose tolerance test and a designed breakfast glucose profile. *International Journal of Gynaecology & Obstetrics*. 2018;141(1):85-90.

**Malipa 2013**

Malipa M, Menon J. The relationship between compliance and quality of life among adolescents with diabetes mellitus type 1. *Medical Journal of Zambia*. 2013;40(3):93-103.

**Mash 2014**

Mash RJ, Rhode H, Zwarenstein M, Rollnick S, Lombard C, Steyn K, et al. Effectiveness of a group diabetes education programme in under-served communities in South Africa: a pragmatic cluster randomized controlled trial. *Diabetic Medicine*. 2014;31(8):987-93.

Mash R, Kroukamp R, Gaziano T, Levitt N. Cost-effectiveness of a diabetes group education program delivered by health promoters with a guiding style in underserved communities in Cape Town, South Africa. *Patient Education & Counseling*. 2015;98(5):622-6.

**Matter 2020**

Matter RM, Elbarbary NS, Ismail EAR, Darwish YW, Nada AS, Banoub VP. Zinc supplementation improves glucose homeostasis in patients with  $\beta^0$ -thalassemia major complicated with diabetes mellitus: a randomized controlled trial. *Nutrition* 2020;73.

**Mohamad 2009**

Mohamad RH, Zekry ZK, Al-Mehdar HA, Salama O, El-Shaieb SE, El-Basmy AA, et al. Camel milk as an adjuvant therapy for the treatment of type 1 diabetes: verification of a traditional ethnomedical practice. *Journal of Medicinal Food*. 2009;12(2):461-5.

**Moustafa 2019**

Moustafa HAM, El Wakeel LM, Halawa MR, Sabri NA, El-Bahy AZ, Singab AN. Effect of *Nigella Sativa* oil versus metformin on glycemic control and biochemical parameters of newly diagnosed type 2 diabetes mellitus patients. *Endocrine*. 2019;65(2):286- 94.

**Muchiri 2016**

Muchiri JW, Gericke GJ, Rheeder P. Effect of a nutrition education programme on clinical status and dietary behaviours of adults with type 2 diabetes in a resource-limited setting in South Africa: a randomised controlled trial. *Public Health Nutrition*. 2016;19(1):142-55.

Muchiri JW, Gericke GJ, Rheeder P. Impact of nutrition education on diabetes knowledge and attitudes of adults with type 2 diabetes living in a resource-limited setting in South Africa: a randomised controlled trial. *Journal of Endocrinology, Metabolism and Diabetes of South Africa*. 2016;21(2):26-34.

#### **Nteleki 2015**

Nteleki B, Abrahamse H, Houeild NN. Conventional podiatric intervention and phototherapy in the treatment of diabetic ulcers. *Seminars in Vascular Surgery*. 2015;28(3-4):172-83.

#### **Owolabi 2019**

Owolabi EO, Goon DT, Ajayi AI. Efficacy, acceptability and feasibility of daily text-messaging in promoting glycaemic control and other clinical outcomes in a low-resource setting of South Africa: A randomised controlled trial. *PLoS ONE [Electronic Resource]*. 2019;14(11):e0224791.

Owolabi EO, Goon DT, Ajayi AI. Impact of mobile phone text messaging intervention on adherence among patients with diabetes in a rural setting: A randomized controlled trial. *Medicine*. 2020;99(12):1-8.

#### **Ragheb 2020**

Ragheb SR, El Wakeel LM, Nasr MS, Sabri NA. Impact of Rutin and Vitamin C combination on oxidative stress and glycemic control in patients with type 2 diabetes. *Clinical nutrition ESPEN*. 2020;35:128-35.

#### **Rashad 2017**

Rashad H, Metwally FM, Ezzat SM, Salama MM, Hasheesh A, Abdel Motaal A. Randomized double-blinded pilot clinical study of the antidiabetic activity of *Balanites aegyptiaca* and UPLC-ESI-MS/MS identification of its metabolites. *Pharmaceutical Biology*. 2017;55(1):1954-61.

#### **RezkAllah 2019**

RezkAllah SS, Takla MK. Effects of different dosages of interval training on glycemic control in people with prediabetes: a randomized controlled trial. *Diabetes spectrum*. 2019;32(2):125- 31.

#### **Saeed 2013**

Saeed AM. Combined vitrectomy and intravitreal injection versus combined laser and injection for treatment of intractable diffuse diabetic macular edema. *Clinical Ophthalmology*. 2013;7:283-97.

#### **Salem 2010**

Salem MA, Aboelasar MA, Elbarbary NS, Elhilaly RA, Refaat YM. Is exercise a therapeutic tool for improvement of cardiovascular risk factors in adolescents with type 1 diabetes mellitus? A randomised controlled trial. *Diabetology & metabolic syndrome*. 2010;2(1):47.

**Sodipo 2017**

Sodipo OO, Adedokun A, Olusola AA. Effect of self-monitoring of blood glucose on glycaemic outcome among type 2 diabetic patients. *South african family practice*. 2017;59(6):208- 13.

**Somanah 2012**

Somanah J, Aruoma OI, Gunness TK, Kowelssur S, Dambala V, Murad F, et al. Effects of a short term supplementation of a fermented papaya preparation on biomarkers of diabetes mellitus in a randomized Mauritian population. *Preventive Medicine*. 2012;54 Suppl:S90-7.

**Steyn 2013**

Steyn K, Lombard C, Gwebushe N, Fourie JM, Everett-Murphy K, Zwarenstein M, et al. Implementation of national guidelines, incorporated within structured diabetes and hypertension records at primary level care in Cape Town, South Africa: a randomised controlled trial. *Glob Health Action*. 2013;6:20796.

**Takenga 2014**

Takenga C, Berndt RD, Musongya O, Kitero J, Katoke R, Molo K, et al. An ICT-Based Diabetes Management System Tested for Health Care Delivery in the African Context. *International Journal of Telemedicine & Applications*. 2014;2014:437307.

**Tawfik 2016**

Tawfik MY, Mohamed RA. The impact of communicating cardiovascular risk in type 2 diabetics on patient risk perception, diabetes self-care, glycosylated hemoglobin, and cardiovascular risk. *Journal of public health*. 2016;24(2):153- 64.

**Thuita 2020**

Thuita AW, Kiage BN, Onyango AN, Makokha AO. Effect of a nutrition education programme on the metabolic syndrome in type 2 diabetes mellitus patients at a level 5 Hospital in Kenya: "a randomized controlled trial". *BMC Nutr*. 2020;6:30.

**Tsobgny-Tsague 2018**

Tsobgny-Tsague NF, Lontchi-Yimagou E, Nana ARN, Tankeu AT, Katte JC, Dehayem MY, et al. Effects of nonsurgical periodontal treatment on glycated haemoglobin on type 2 diabetes patients (PARODIA 1 study): a randomized controlled trial in a sub-Saharan Africa population. *BMC Oral Health*. 2018;18(1):28.

**Utz 2018**

Utz B, Assarag B, Smekens T, Ennassiri H, Lekhal T, El Ansari N, et al. Detection and initial management of gestational diabetes through primary health care services in Morocco: An effectiveness-implementation trial. *PloS one*. 2018;13(12):e0209322.

**van der Hoogt 2017**

van der Hoogt M, van Dyk JC, Dolman RC, Pieters M. Protein and fat meal content increase insulin requirement in children with type 1 diabetes - Role of duration of diabetes. *Journal of clinical and translational endocrinology*. 2017;10:15- 21.

**van Rooijen 2004**

van Rooijen AJ, Rheeder P, Eales CJ, Becker PJ. Effect of exercise versus relaxation on haemoglobin A1C in Black females with type 2 diabetes mellitus. *Qjm*. 2004;97(6):343-51.

**Webb 2015**

Webb EM, Rheeder P, Van Zyl DG. Diabetes care and complications in primary care in the Tshwane district of South Africa. *Primary care diabetes*. 2015;9(2):147-54.

Webb EM, Rheeder P, Roux P. Screening in Primary Care for Diabetic Retinopathy, Maculopathy and Visual Loss in South Africa. *Ophthalmologica*. 2016;235(3):141-9.

Webb EM, Rheeder P. A cluster-randomized trial to estimate the effect of mobile screening and treatment feedback on HbA1c and diabetes-related complications in Tshwane primary health care clinics, South Africa. *Primary care diabetes*. 2017;11(6):546-54.

**Yakoot 2019**

Yakoot M, Abdelatif M, Helmy S. Efficacy of a new local limb salvage treatment for limb-threatening diabetic foot wounds-a randomized controlled study. *Diabetes, Metabolic Syndrome and Obesity: Targets and Therapy*. 2019;12:1659.

**Yan 2014**

Yan H, Prista A, Ranadive SM, Damasceno A, Caupers P, Kanaley JA, et al. Effect of Aerobic Training on Glucose Control and Blood Pressure in T2DDM East African Males. *Isrn Endocrinology Print*. 2014;2014:864897.

## 1.2 List of excluded studies

### 1.2.1 Other design (28 references)

1. Abd El Hameed AA, Shreif HE, Mowafy HE. The role of continuing metformin therapy during pregnancy in the reduction of gestational diabetes and improving pregnancy outcomes in women with polycystic ovary syndrome. *Middle east fertility society journal*. 2011;16(3):204- 8.
2. Abdelaziz TS, Sadek KM. Effect of reducing medication regimen complexity on glycaemic control in patients with diabetes. *Romanian Journal of Internal Medicine*. 2019;57(1):23-9.
3. Agboola-Abu CF, Ohwovoriole AE, Akinlade KS. The effect of oral hypoglycaemic agents on dyslipidaemia in Nigerian patients with newly diagnosed non-insulin dependent diabetes mellitus--a prospective study. *West African Journal of Medicine*. 2000;19(2):126-31.
4. Assah FK, Atanga EN, Enoru S, Sobngwi E, Mbanya JC. Community-based peer support significantly improves metabolic control in people with Type 2 diabetes in Yaounde, Cameroon. *Diabetic Medicine*. 2015;32(7):886-9.
5. Bahramikia S, Yazdanparast R. Phytochemistry and medicinal properties of *Teucrium polium* L. (Lamiaceae). *Phytotherapy Research*. 2012;26(11):1581-93.
6. Bailey CJ, Iqbal N, T'Joen C, List JF. Dapagliflozin monotherapy in drug-naive patients with diabetes: a randomized-controlled trial of low-dose range. *Diabetes, Obesity & Metabolism*. 2012;14(10):951-9.
7. Bekkouche L, Bouchenak M, Malaisse WJ, Yahia DA. The Mediterranean diet adoption improves metabolic, oxidative, and inflammatory abnormalities in Algerian metabolic syndrome patients. *Hormon- und Stoffwechselforschung / Hormones et metabolisme [Hormone and metabolic research]*. 2014;46(4):274- 82.
8. Bello SI, Ganiyu KA, Dakop YO, Erah PO. Pharmacist's intervention in the control of blood sugar levels in randomised diabetes patients at a primary health care setting in Benin City. *Nigerian Quarterly Journal of Hospital Medicine*. 2012;22(4):245-8.
9. Brown J, Martis R, Hughes B, Rowan J, Crowther CA. Oral anti-diabetic pharmacological therapies for the treatment of women with gestational diabetes. *Cochrane Database of Systematic Reviews*. 2017;1:CD011967.
10. Chou HS, Truitt KE, Moberly JB, Merante D, Choi Y, Mun Y, et al. A 26-week, placebo- and pioglitazone-controlled monotherapy study of rivoglitazone in subjects with type 2 diabetes mellitus. *Diabetes, Obesity & Metabolism*. 2012;14(11):1000-9.
11. De Caterina R, Andersson U, Alexander JH, Al-Khatib SM, Bahit MC, Goto S, et al. History of bleeding and outcomes with apixaban versus warfarin in patients with atrial fibrillation in the Apixaban for Reduction in Stroke and Other Thromboembolic Events in Atrial Fibrillation trial. *American Heart Journal*. 2016;175:175-83.

12. De Luca G, Michael Gibson C, Bellandi F, Murphy S, Maioli M, Noc M, et al. Benefits of pharmacological facilitation with glycoprotein IIb-IIIa inhibitors in diabetic patients undergoing primary angioplasty for STEMI. A subanalysis of the EGYPT cooperation. *Journal of Thrombosis & Thrombolysis*. 2009;28(3):288-98.
13. El-Fattah AAA, Hamed MI, Sadek SE, Abu-Elhana AS. Insulin resistance in type II diabetes mellitus with liver cirrhosis. *Global journal of pharmacology*. 2013;7(2):109- 17.
14. Fullerton B, Siebenhofer A, Jeitler K, Horvath K, Semlitsch T, Berghold A, et al. Short-acting insulin analogues versus regular human insulin for adults with type 1 diabetes mellitus. *Cochrane Database of Systematic Reviews*. 2016(6):CD012161.
15. Gessler N, Labhard ND, Stolt P, Manga E, Balo JR, Boffolo A, et al. The lesson of Monsieur Nouma: effects of a culturally sensitive communication tool to improve health-seeking behavior in rural Cameroon. *Patient Education & Counseling*. 2012;87(3):343-50.
16. Ibrahim MA, Sarhan, II, Halawa MR, Afify EN, Hebah HA, Al-Gohary EA, et al. Study of the effect of vitamin D supplementation on glycemic control in type 2 diabetic prevalent hemodialysis patients. *Hemodialysis international*. 2015;19:S11- S9.
17. Jingi AM, Noubiap JJ, Essouma M, Bigna JJ, Nansseu JR, Ellong A, et al. Association of insulin treatment versus oral hypoglycaemic agents with diabetic retinopathy and its severity in type 2 diabetes patients in Cameroon, sub-Saharan Africa. *Annals of Translational Medicine*. 2016;4(20):395.
18. Kadiri A, Al-Nakhi A, El-Ghazali S, Jabbar A, Al Arouj M, Akram J, et al. Treatment of type 1 diabetes with insulin lispro during Ramadan. *Diabetes & metabolism*. 2001;27(4 Pt 1):482- 6.
19. Kamau RK, Maina FW, Kigundu C, Mati JK. The effect of low-oestrogen combined pill, progestogen-only pill and medroxyprogesterone acetate on oral glucose tolerance test. *East African Medical Journal*. 1990;67(8):550-5.
20. Moghazy AM, Shams ME, Adly OA, Abbas AH, El-Badawy MA, Elsakka DM, et al. The clinical and cost effectiveness of bee honey dressing in the treatment of diabetic foot ulcers. *Diabetes Research & Clinical Practice*. 2010;89(3):276-81.
21. Notelovitz M. Sulphonylurea therapy in the treatment of the pregnant diabetic. *South African Medical Journal Suid-Afrikaanse Tydskrif Vir Geneeskunde*. 1971;45(9):226-9.
22. Osman H, Khamis O, Elfeky M, El Amin Ali A, Abdelwahed M. Effect of short-term erythropoietin therapy on insulin resistance and serum levels of leptin and neuropeptide y in hemodialysis patients. *Indian journal of endocrinology and metabolism*. 2017;21(5):724- 30.
23. Razak A, Isaacs AA. Implementation and evaluation of a weight-reduction programme for diabetic patients at a primary health care facility in the western cape: a pilot study. *South african family practice*. 2017;59(6):189- 94.



24. Schumm-Draeger PM, Burgess L, Koranyi L, Hrubá V, Hamer-Maansson JE, de Bruin TW. Twice-daily dapagliflozin co-administered with metformin in type 2 diabetes: a 16-week randomized, placebo-controlled clinical trial. *Diabetes, Obesity & Metabolism*. 2015;17(1):42-51.
25. Speechly DP, Buffenstein R. Appetite dysfunction in obese males: evidence for role of hyperinsulinaemia in passive overconsumption with a high fat diet. *European journal of clinical nutrition*. 2000;54(3):225- 33.
26. Todowede OO, Sartorius B. Prevalence of metabolic syndrome, discrete or comorbid diabetes and hypertension in sub-Saharan Africa among people living with HIV versus HIV-negative populations: a systematic review and meta-analysis protocol. *BMJ Open*. 2017;7(7):e016602.
27. Van Olmen J, Van Pelt M, Malombo B, Ku GM, Kanda D, Heang H, et al. Process evaluation of a mobile health intervention for people with diabetes in low income countries - the implementation of the TEXT4DSM study. *Journal of Telemedicine & Telecare*. 2017;23(1):96-105.
28. Werfalli M, Raubenheimer P, Engel M, Peer N, Kalula S, Kengne AP, et al. Effectiveness of community-based peer-led diabetes self-management programmes (COMP-DSMP) for improving clinical outcomes and quality of life of adults with diabetes in primary care settings in low and middle-income countries (LMIC): a systematic review and meta-analysis. *BMJ Open*. 2015;5(7):e007635.

### **1.2.2 Other population (32 references)**

1. Ali Hassan H, El-Gezeiry D, Nafaa TM, Baghdady I. Improved responsiveness of PCOS patients to clomiphene after CYP17a inhibitor. *Journal of assisted reproduction and genetics*. 2001;18(11):608- 11.
2. Amador-Licona N, Guízar-Mendoza J, Vargas E, Sánchez-Camargo G, Zamora-Mata L. The short-term effect of a switch from glibenclamide to metformin on blood pressure and microalbuminuria in patients with type 2 diabetes mellitus. *Archives of medical research*. 2000;31(6):571- 5.
3. Ashoush S, Abou-Gamrah A, Bayoumy H, Othman N. Chromium picolinate reduces insulin resistance in polycystic ovary syndrome: randomized controlled trial. *Journal of obstetrics and gynaecology research*. 2016;42(3):279- 85.
4. Ashtary-Larky D, Ghanavati M, Lamuchi-Deli N, Payami SA, Alavi-Rad S, Boustaninejad M, et al. Rapid Weight Loss vs. slow weight loss: which is more effective on body composition and metabolic risk factors? *International journal of endocrinology and metabolism*. 2017;15(3) (no pagination).

5. Bashandy GMN, Boules NS, Taha FM. Effects of a single preoperative dose of N(2)-L-alanyl-L-glutamine on insulin resistance and plasma glutathione levels in the early postoperative period. *Egyptian journal of anaesthesia*. 2013;29(4):319- 24.
6. Bays HE, Evans JL, Maki KC, Evans M, Maquet V, Cooper R, et al. Chitin-glucan fiber effects on oxidized low-density lipoprotein: a randomized controlled trial. *European Journal of Clinical Nutrition*. 2013;67(1):2-7.
7. Belinova L, Kahleova H, Malinska H, Topolcan O, Windrichova J, Oliyarnyk O, et al. The effect of meal frequency in a reduced-energy regimen on the gastrointestinal and appetite hormones in patients with type 2 diabetes: a randomised crossover study. *Plos one*. 2017;12(4):e0174820.
8. Campbell-Tofte JI, Mølgaard P, Josefsen K, Abdallah Z, Hansen SH, Cornett C, et al. Randomized and double-blinded pilot clinical study of the safety and anti-diabetic efficacy of the Rauwolfia-Citrus tea, as used in Nigerian traditional medicine. *Journal of ethnopharmacology*. 2011;133(2):402- 11.10.
9. El-Haggag SM, Mostafa TM. Comparative clinical study between the effect of fenofibrate alone and its combination with pentoxifylline on biochemical parameters and liver stiffness in patients with non-alcoholic fatty liver disease. *Hepatology international*. 2015;9(3):471- 9.
10. Gupta V, Keshari BB, Tiwari SK, Murthy K. A comparative study of Shilajatu and Asanadi Ghana Vati in the management of Madhumeha w.s.r. to type-2 diabetes mellitus. *Ayu*. 2016;37(2):120-4.
11. Hashim HA, Lakany NE, Sherief L. Combined metformin and clomiphene citrate versus laparoscopic ovarian diathermy for ovulation induction in clomiphene-resistant women with polycystic ovary syndrome: a randomized controlled trial. *Journal of obstetrics and gynaecology research*. 2011;37(3):169- 77.
12. Home PD, Bolli GB, Mathieu C, Deerochanawong C, Landgraf W, Candelas C, et al. Modulation of insulin dose titration using a hypoglycaemia-sensitive algorithm: insulin glargine versus neutral protamine Hagedorn insulin in insulin-naive people with type 2 diabetes. *Diabetes, Obesity & Metabolism*. 2015;17(1):15-22.
13. Ismail NA, Ragab S, Abd El Baky ANE, Hamed M, Ibrahim ASA. Effect of oral curcumin administration on insulin resistance, serum resistin and fetuin-A in obese children: randomized placebo-controlled study. *Research journal of pharmaceutical, biological and chemical sciences*. 2014;5(1):887- 96.
14. Kumari J, Mehta CS, Shukla VD, Dave AR, Shingala TM. A comparative clinical study of Nyagrodhadi Ghanavati and Virechana Karma in the management of Madhumeha. *Ayu*. 2010;31(3):300-4.

15. Malin SK, Hinnerichs KR, Echtenkamp BG, Evetovich TK, Engebretsen BJ. Effect of adiposity on insulin action after acute and chronic resistance exercise in non-diabetic women. *European journal of applied physiology*. 2013;113(12):2933- 41.
16. Malin SK, Kullman EL, Scelsi AR, Haus JM, Filion J, Pagadala MR, et al. A whole-grain diet reduces peripheral insulin resistance and improves glucose kinetics in obese adults: a randomized-controlled trial. *Metabolism: clinical and experimental*. 2018;82:111- 7.
17. Malin SK, Niemi N, Solomon TP, Haus JM, Kelly KR, Filion J, et al. Exercise training with weight loss and either a high- or low-glycemic index diet reduces metabolic syndrome severity in older adults. *Annals of nutrition & metabolism*. 2012;61(2):135- 41.
18. Manaf A, Tjandrawinata RR, Malinda D. Insulin sensitizer in prediabetes: a clinical study with DLBS3233, a combined bioactive fraction of *Cinnamomum burmanii* and *Lagerstroemia speciosa*. *Drug design, development and therapy*. 2016;10:1279- 89.
19. Mendez-Del Villar M, Gonzalez-Ortiz M, Martinez-Abundis E, Perez-Rubio KG, Cortez-Navarrete M. Effect of *Irvingia gabonensis* on Metabolic Syndrome, Insulin Sensitivity, and Insulin Secretion. *Journal of Medicinal Food*. 2018;21(6):568-74.
20. Mogharnasi M, TaheriChadorneshin H, Papoli-Baravati SA, Teymuri A. Effects of upper-body resistance exercise training on serum nesfatin-1 level, insulin resistance, and body composition in obese paraplegic men. *Disability and health journal*. 2018;(no pagination).
21. Nadkarni MA, Vyas SN, Baghel MS, Ravishankar B. Randomized placebo-controlled trial of Mustadi Ghanavati in hyperlipidemia. *Ayu*. 2010;31(3):287-93.
22. Ngo-Matip ME, Pieme CA, Azabji-Kenfack M, Biapa PC, Germaine N, Heike E, et al. Effects of *Spirulina platensis* supplementation on lipid profile in HIV-infected antiretroviral naïve patients in Yaounde-Cameroon: a randomized trial study. *Lipids in health and disease*. 2014;13:191.
23. Ngondi JL, Etoundi BC, Nyangono CB, Mbofung CM, Oben JE. IGOB131, a novel seed extract of the West African plant *Irvingia gabonensis*, significantly reduces body weight and improves metabolic parameters in overweight humans in a randomized double-blind placebo controlled investigation. *Lipids in health and disease*. 2009;8:7.
24. Philis-Tsimikas A, Del Prato S, Satman I, Bhargava A, Dharmalingam M, Skjoth TV, et al. Effect of insulin degludec versus sitagliptin in patients with type 2 diabetes uncontrolled on oral antidiabetic agents. *Diabetes, Obesity & Metabolism*. 2013;15(8):760-6.
25. Pieber TR, Treichel HC, Hompesch B, Philotheou A, Mordhorst L, Gall MA, et al. Comparison of insulin detemir and insulin glargine in subjects with Type 1 diabetes using intensive insulin therapy. *Diabetic Medicine*. 2007;24(6):635-42.

26. Rizk AY, Bedaiwy MA, Al-Inany HG. N-acetyl-cysteine is a novel adjuvant to clomiphene citrate in clomiphene citrate-resistant patients with polycystic ovary syndrome. *Fertility and sterility*. 2005;83(2):367- 70.
27. Rost NS, Giugliano RP, Ruff CT, Murphy SA, Crompton AE, Norden AD, et al. Outcomes With Edoxaban Versus Warfarin in Patients With Previous Cerebrovascular Events: Findings From ENGAGE AF-TIMI 48 (Effective Anticoagulation With Factor Xa Next Generation in Atrial Fibrillation-Thrombolysis in Myocardial Infarction 48). *Stroke*. 2016;47(8):2075-82.
28. Shabana W, Teleb M, Dawod T, Abu Taha H, Abdulla A, Shahin A, et al. Outcome of alpha-blockers, with or without methylprednisolone combination, in medical expulsive therapy for lower ureteric stones: a prospective randomised study. *Arab journal of urology*. 2016;14(1):7- 11.
29. Strojek K, Yoon KH, Hruby V, Sugg J, Langkilde AM, Parikh S. Dapagliflozin Added to Glimpiride in Patients with Type 2 Diabetes Mellitus Sustains Glycemic Control and Weight Loss Over 48 Weeks: a Randomized, Double-Blind, Parallel-Group, Placebo-Controlled Trial. *Diabetes therapy*. 2014;5(1):267- 83.
30. Timmers S, De Ligt M, Phielix E, Van De Weijer T, Hansen J, Moonen-Kornips E, et al. Resveratrol as add-on therapy in subjects with well-controlled type 2 diabetes: a randomized controlled trial. *Diabetes care*. 2016;39(12):2211- 7.
31. Van Olmen J, Kegels G, Korachais C, de Man J, Van Acker K, Kalobu JC, et al. The effect of text message support on diabetes self-management in developing countries - A randomised trial. *Journal of Clinical & Translational Endocrinology*. 2017;7:33-41.
32. Vázquez C, Botella-Carretero JI, Corella D, Fiol M, Lage M, Lurbe E, et al. White fish reduces cardiovascular risk factors in patients with metabolic syndrome: the WISH-CARE study, a multicenter randomized clinical trial. *Nutrition, metabolism, and cardiovascular diseases : NMCD*. 2014;24(3):328- 35.

### **1.2.3 Other intervention (8 references)**

1. Babiker R, Elmusharaf K, Keogh MB, Saeed AM. Effect of Gum Arabic (*Acacia Senegal*) supplementation on visceral adiposity index (VAI) and blood pressure in patients with type 2 diabetes mellitus as indicators of cardiovascular disease (CVD): a randomized and placebo-controlled clinical trial. *Lipids in Health & Disease*. 2018;17(1):56.
2. Dirajlal-Fargo S, Musiime V, Cook A, Mirembe G, Kenny J, Jiang Y, et al. Insulin Resistance and Markers of Inflammation in HIV-infected Ugandan Children in the CHAPAS-3 Trial. *Pediatric infectious disease journal*. 2017;36(8):761- 7.
3. Djoumessi RN, Noubiap JJ, Kaze FF, Essouma M, Menanga AP, Kengne AP, et al. Effect of low-dose spironolactone on resistant hypertension in type 2 diabetes mellitus: a

randomized controlled trial in a sub-Saharan African population. *BMC Research Notes*. 2016;9:187.

4. Elnashar A, Fahmy M, Mansour A, Ibrahim K. N-acetyl cysteine vs. metformin in treatment of clomiphene citrate-resistant polycystic ovary syndrome: a prospective randomized controlled study. *Fertility and sterility*. 2007;88(2):406- 9.
5. Elsedek M-EA, Elgindy E. Comparison between two clomiphene citrate protocols for induction of ovulation in clomiphene resistant polycystic ovary syndrome. *Middle east fertility society journal*. 2014;19(4):243- 7.
6. Gopalan A, Paramanund J, Shaw PA, Patel D, Friedman J, Brophy C, et al. Randomised controlled trial of alternative messages to increase enrolment in a healthy food programme among individuals with diabetes. *BMJ Open*. 2016;6(11):e012009.
7. Onyechi KC, Eseadi C, Okere AU, Onuigbo LN, Umoke PC, Anyaegbunam NJ, et al. Effects of cognitive behavioral coaching on depressive symptoms in a sample of type 2 diabetic inpatients in Nigeria. *Medicine*. 2016;95(31):e4444.
8. Shehata M, Hamza M. Impact of high loading dose of atorvastatin in diabetic patients with renal dysfunction undergoing elective percutaneous coronary intervention: a randomized controlled trial. *Cardiovascular therapeutics*. 2015;33(2):35-41.

#### **1.2.4 Other comparison (1 reference)**

1. Ahmed ME, Mohammed MS, Mahadi SI. Primary wound closure of diabetic foot ulcers by debridement and stitching. *Journal of Wound Care*. 2016;25(11):650-4.

#### **1.2.5 Other outcome (7 references)**

1. Belkhadir J, el Ghomari H, Klocker N, Mikou A, Nasciri M, Sabri M. Muslims with non-insulin dependent diabetes fasting during Ramadan: treatment with glibenclamide. *BMJ*. 1993;307(6899):292-5.
2. El-Tamalawy MM, Ibrahim OM, Hassan TM, El-Barbari AA. Effect of Combination Therapy of Ezetimibe and Atorvastatin on Remnant Lipoprotein Versus Double Atorvastatin Dose in Egyptian Diabetic Patients. *Journal of Clinical Pharmacology*. 2018;58(1):34-41.
3. Hassanien M, Elawamy A, Kamel EZ, Khalifa WA, Abolfadl GM, Roushdy ASI, et al. Perineural Platelet-Rich Plasma for Diabetic Neuropathic Pain, Could It Make a Difference? *Pain Medicine*. 2020;21(4):757-65.
4. Lakhdar N, Denguezli M, Zaouali M, Zbidi A, Tabka Z, Bouassida A. Diet and diet combined with chronic aerobic exercise decreases body fat mass and alters plasma and adipose tissue inflammatory markers in obese women. *Inflammation*. 2013;36(6):1239- 47.
5. Marais C, Hall DR, van Wyk L, Conradie M. Randomized cross-over trial comparing the diagnosis of gestational diabetes by oral glucose tolerance test and a designed breakfast glucose profile. *International Journal of Gynaecology & Obstetrics*. 2018;141(1):85-90.

6. Saied GM, Kamel RM, Labib AM, Said MT, Mohamed AZ. The diabetic foot and leg: combined He-Ne and infrared low-intensity lasers improve skin blood perfusion and prevent potential complications. A prospective study on 30 Egyptian patients. *Lasers in Medical Science*. 2011;26(5):627-32.
7. Tawfik MY. The Impact of Health Education Intervention for Prevention and Early Detection of Type 2 Diabetes in Women with Gestational Diabetes. *Journal of Community Health*. 2017;42(3):500-10.

### 1.2.6

### 1.2.7 Other publications (41 references)

1. Agbozo F, Abubakari A, Narh C, Jahn A. Are we missing pregnant women with gestational diabetes? Evidence from a diagnostic accuracy study comparing glycosuria, glycated haemoglobin, random and fasting glucose to oral glucose tolerance test. *Tropical medicine and international health Conference: 10th european congress on tropical medicine and international health Belgium*. 2017;22(Supplement 1):351- 2.
2. Anyanwu AC, Fasanmade OA, Coker HB, Ohwovoriole AE. Vitamin D supplementation improves glycaemia in Vitamin D deficient nigerians with diabetes mellitus. *Endocrine reviews Conference: 96th annual meeting and expo of the endocrine society, ENDO 2014 Chicago, IL united states Conference start: 20140621 Conference end: 20140624 Conference publication: (varpagings)*. 2014;35(no pagination).
3. Aronson R, Cohen O, Conget I, Runzis S, Castaneda J, de Portu S, et al. OpT2mise: a randomized controlled trial to compare insulin pump therapy with multiple daily injections in the treatment of type 2 diabetes-research design and methods. *Diabetes Technology & Therapeutics*. 2014;16(7):414-20.
4. Azar ST, Echtay A, Wan Bebakar WM, Alaraj S, Berrah A, Omar M, et al. Efficacy and safety of liraglutide versus sulfonylurea both in combination with metformin during ramadan in subjects with type 2 diabetes (lira-ramadan): a randomized trial. *Journal of endocrinology, metabolism and diabetes of south africa Conference: 51st congress of the society for endocrinology, metabolism and diabetes of south africa, SEMDSA 2016 South africa*. 2016;21(1):14.
5. Balde N, Camara A, Sobngwi-Tambekou J, Balti EV, Tchatchoua A, Fezeu L, et al. Improving access to HbA1c in sub-Saharan Africa (IA3) cohort: cohort profile. *The Pan African Medical Journal*. 2017;27.
6. Chi CT. A Multicenter, randomized, double-blind, positive controlled clinical study to assess the efficacy and safety of Acetyl L-Carnitine in the treatment of diabetic peripheral neuropathy. *Chictr*. 2008.

7. Elnashar A, El Maghraby H, Nafee T, Guiziry D, Fourtia I. Randomized controlled trial of the effects of metformin versus combined oral contraceptives in adolescent PCOS women through a 24 months follow up period. *Human reproduction*. 2015;30:i5.
8. Evans JL, Bays H, Maki KC, Evans M, Maquet V, Cooper R, et al. Chitin-glucan fiber effects on oxidized low-density lipoprotein: a randomized controlled trial. *Circulation*. 2012;125(10 SUPPL. 1).
9. Goedecke JH, Mendham AE, Clamp L, Nono Nankam PA, Fortuin-de Smidt MC, Phiri L, et al. An Exercise Intervention to Unravel the Mechanisms Underlying Insulin Resistance in a Cohort of Black South African Women: Protocol for a Randomized Controlled Trial and Baseline Characteristics of Participants. *JMIR Research Protocols*. 2018;7(4):e75.
10. Lanasri N, Nibouche NW, Atif L, Makhoulouf L, Zeraoulia F, Hansal F, et al. Comparison of two therapeutic education methods in diabetic patients: a randomised controlled trial. *Diabetologia Conference: 54th annual meeting of the european association for the study diabetes, EASD 2018 Germany*. 2018;61(Supplement 1):S433.
11. Malin SK, Louis-Kullman E, Scelsi AR, Haus JM, Filion J, Godin JP, et al. Whole grain diet improves glucose tolerance, insulin sensitivity, and beta-cell function in overweight prediabetic adults. *Diabetes*. 2014;63:A78.
12. Malin SK, Samat A, Wolski K, Abood B, Pothier C, Bhatt DL, et al. Gastric bypass surgery enhances ghrelin suppression and improves beta-cell function and central obesity at 24 months in moderately obese adults with type 2 diabetes. *Diabetes*. 2013;62:A729.
13. Mash B, Levitt N, Steyn K, Zwarenstein M, Rollnick S. Effectiveness of a group diabetes education programme in underserved communities in South Africa: pragmatic cluster randomized control trial. *BMC Family Practice*. 2012;13:126.
14. Mwangi N, Bascaran C, Ng'ang'a M, Ramke J, Kipturgo M, Gichuhi S, et al. Feasibility of a cluster randomized controlled trial on the effectiveness of peer-led health education interventions to increase uptake of retinal examination for diabetic retinopathy in Kirinyaga, Kenya: a pilot trial. *Pilot feasibility stud*. 2020;6:102.
15. Mwangi N, Bascaran C, Ramke J, Kipturgo M, Kim M, Ng'ang'a M, et al. Peer-support to increase uptake of screening for diabetic retinopathy: process evaluation of the DURE cluster randomized trial. *Tropical Medicine & Health*. 2020;48:1.
16. Mwangi N, Ng'ang'a M, Gakuo E, Gichuhi S, Macleod D, Moorman C, et al. Effectiveness of peer support to increase uptake of retinal examination for diabetic retinopathy: study protocol for the DURE pragmatic cluster randomized clinical trial in Kirinyaga, Kenya. *BMC Public Health*. 2018;18(1):871.
17. Nassar WF, El-Ansary M, Shehab T, Abdelhameed M, Saad A, Esa W, et al. Effect of cell-free mesenchymal stem cells microvesicles (MVS) and exosomes therapy on beta-cell mass in type 1 diabetes mellitus (T1DM). *Diabetes*. 2015;64:A282.

18. Nct. The Efficacy of Specialist Collaboration and Mobile Screening for Improving the Management of Diabetes. <https://clinicaltrials.gov/show/nct01275040>. 2010.
19. Nct. Trial on an Educative Structured Intervention by Peer Educators to Improve HbA1c of Patients With Type 2 Diabetes in the Sikasso Region in Mali. <https://clinicaltrials.gov/show/nct01153048>. 2010.
20. Nct. Propolis Improves Glycemic Control in Subjects With Type 2 Diabetes and Chronic Periodontitis. <https://clinicaltrials.gov/show/nct02794506>. 2016.
21. Nct. Community- and mHealth-Based Integrated Management of Diabetes in Primary Healthcare in Rwanda. <https://clinicaltrials.gov/show/nct03376607>. 2017.
22. Nct. Nutrition Education Intervention for Adults With Type 2 Diabetes. <https://clinicaltrials.gov/show/nct03334773>. 2017.
23. Nct. Helium-Neon Laser Therapy Versus Infrared Laser Therapy in Treating Patients With Diabetic Foot Ulcer. <https://clinicaltrials.gov/show/nct03338517>. 2017.
24. Nct. Diabetes Self-Management Education (DSME) and Its Effect on Clinical, Psychosocial, and Behavioral Outcomes. <https://clinicaltrials.gov/show/nct03185689>. 2017.
25. Noakes TD. The Women's health initiative randomized controlled dietary modification trial: an inconvenient finding and the diet-heart hypothesis. *South african medical journal*. 2013;103(11):824- 5.
26. Orchard TJ, Sibomana L, Miller R. Evaluation of differing type 1 diabetes treatment regimens in youth in Rwanda. *Pediatric diabetes*. 2014;15:25- 6.
27. Pengpid S, Peltzer K, Skaal L. Efficacy of a church-based lifestyle intervention programme to control high normal blood pressure and/or high normal blood glucose in church members: a randomized controlled trial in Pretoria, South Africa. *BMC Public Health*. 2014;14:568.
28. Rockers PC, Wirtz VJ, Vian T, Onyango MA, Ashigbie PG, Laing R. Study protocol for a cluster-randomised controlled trial of an NCD access to medicines initiative: evaluation of Novartis Access in Kenya. *BMJ Open*. 2016;6(11):e013386.
29. Ross SM. African mango (IGOB131): a proprietary seed extract of *Irvingia gabonensis* is found to be effective in reducing body weight and improving metabolic parameters in overweight humans. *Holistic nursing practice*. 2011;25(4):215- 7.
30. Salman SA, Farghaly TA, Attallah DA, Abdel-Hafeez HA, Shaaban OM. Insulin sensitizing agent (metformin) improves clinical pregnancy rate in clomiphene citrate resistant polycystic ovarian syndrome patients with acanthosis nigricans. *Fertility and sterility*. 2014;102(3 SUPPL. 1):e139.
31. Samir Elbarbary N, Abdel Rahman Ismail E, El-Naggar AR, Hany Hamouda M, El-Hamamsy M. Role of carnosine as an adjuvant therapy for diabetic nephropathy in children and adolescents with type 1 diabetes: relation to oxidative stress, renal functional integrity



and glycemic control. Pediatric diabetes Conference: 43rd annual meeting of the international society for pediatric and adolescent diabetes , ISPAD 2017 Austria. 2017;18(Supplement 25):115.

32. Sherif EM, El Tonbary KY, Abd Aziz MM. Comparative study between the use of insulin glargine and intermediate acting insulin (NPH) in type 1 diabetic children less than eight years old. *Pediatric diabetes*. 2014;15:46.

33. Sibomana L, Rwabufigiri B, Kaberuka V, Gishoma C, Rubanzana W, Miller RG, et al. Type 1 diabetes-related quality of life in Rwanda. *Diabetes*. 2015;64:A368.

34. Utz B, Assarag B, Essolbi A, Barkat A, El Ansari N, Fakhir B, et al. Improving detection and initial management of gestational diabetes through the primary level of care in Morocco: protocol for a cluster randomized controlled trial. *Reproductive Health*. 2017;14(1):75.

35. van Olmen J, Ku GM, van Pelt M, Kalobu JC, Hen H, Darras C, et al. The effectiveness of text messages support for diabetes self-management: protocol of the TEXT4DSM study in the democratic Republic of Congo, Cambodia and the Philippines. *BMC Public Health*. 2013;13:423.

36. Vedanthan R, Kamano JH, Lee H, Andama B, Bloomfield GS, DeLong AK, et al. Bridging Income Generation with Group Integrated Care for cardiovascular risk reduction: rationale and design of the BIGPIC study. *American heart journal*. 2017;188:175- 85.

37. Veleba J, Janovska P, Kuda O, Horakova O, Malinska H, Kazdova L, et al. Combined intervention with pioglitazone and N-3 fatty acids in metformin-treated diabetic patients. *Obesity facts*. 2015;8:213.

38. Viviers C, Van Rooijen AJ. Daily physical activity and diet intervention for individuals with type 2 diabetes mellitus: a randomised controlled trial. *South african journal of clinical nutrition*. 2010;23(3 SUPPL. 2):S35.

39. Wargny M, Kleinebreil L, Diop SN, Ndour-Mbaye M, Ba Diop M, Balkau B, et al. SMS-based intervention in type 2 diabetes: clinical trial in Senegal. *BMJ innovations*. 2018.

40. Zeghari L, Aboussaleh Y. Comparison of two approaches of nutritional education in the management of diabetes. *Annals of nutrition and metabolism Conference: 21st international congress of nutrition, ICN 2017 Argentina*. 2017;71(Supplement 2):903- 4.

41. Zennaki A, Niar S, Naceur M, Aichaoui H, Ouzzaa K, Aoui A, et al. Effect of paramedical treatment codified on balance, quality of life and knowledge of teenagers suffering from T1DM persisting imbalance. *Pediatric diabetes ( varpagings)*. 2015;16:89.
